# Supplementary material for: Identification of key genes associated with multiple sclerosis based on gene expression data from peripheral blood mononuclear cells
Source: PeerJ. 2020 Feb 3;8:e8357. doi: 10.7717/peerj.8357 (PMC7003695; doi:10.7717/peerj.8357)
Supplement: Table S1 [file peerj-08-8357-s005.xlsx]

## Sheet: Sheet1
			DEGs between PP-MS and Healthy control
up-regulated							down-regulated
Gene symble	logFC	AveExpr	t	P.Value	adj.P.Val		Gene symble	logFC	AveExpr	t	P.Value	adj.P.Val
TNFAIP8L2	1.39156	6.44534	17.0487	8.72751e-21	1.45619e-16		SBDS	-1.64845	9.008	-15.3408	4.41292e-19	2.15721e-15
CCR2	2.88381	6.2736	16.9083	1.19155e-20	1.45619e-16		SBDSP1	-1.64845	9.008	-15.3408	4.41292e-19	2.15721e-15
GIMAP8	2.29116	5.44025	15.9803	9.8048e-20	7.9883e-16		HAUS3	-1.72108	8.37912	-14.6707	2.23877e-18	6.84002e-15
TLR7	1.08739	5.19659	15.2129	5.9933e-19	2.44147e-15		CCNL1	-1.42414	9.4793	-14.1506	8.17668e-18	1.66545e-14
DUSP7	1.46638	5.49701	14.7778	1.72121e-18	6.00998e-15		NXT1	-1.3712	8.10165	-14.0772	9.84117e-18	1.71813e-14
NLRC4	1.48728	5.10933	14.568	2.88391e-18	7.83205e-15		CXCR4	-1.11115	11.8605	-13.9809	1.25599e-17	1.9546e-14
ST8SIA4	2.1323	5.1489	14.4536	3.82968e-18	8.9936e-15		HBEGF	-2.53004	7.59389	-13.8137	1.92426e-17	2.47541e-14
CALHM2	1.35039	6.82186	14.4314	4.04752e-18	8.9936e-15		MAFF	-2.58504	8.22554	-13.3776	5.94344e-17	6.92653e-14
C14orf119	1.71021	6.97016	13.8292	1.8491e-17	2.47541e-14		BTG3	-1.8001	7.27773	-13.3724	6.02595e-17	6.92653e-14
CX3CR1	3.70364	7.96073	13.3593	6.2345e-17	6.92653e-14		DBF4	-1.61236	7.73915	-13.0145	1.54706e-16	1.45435e-13
RSBN1L	1.20945	6.02936	13.2886	7.50386e-17	7.97432e-14		G0S2	-3.73653	9.37574	-12.802	2.72918e-16	2.03819e-13
COPB2	1.60683	6.1558	13.2571	8.15006e-17	8.30016e-14		TNFAIP3	-1.92309	11.0943	-12.4412	7.24471e-16	4.42688e-13
GIMAP4	2.62714	7.93026	13.0281	1.49221e-16	1.45435e-13		GABARAPL3	-2.4363	8.34491	-12.2103	1.36493e-15	7.25254e-13
ZC3H13	1.36596	6.30198	12.998	1.61669e-16	1.46352e-13		JUN	-2.57584	8.54814	-12.1826	1.47323e-15	7.5018e-13
CETN3	2.08146	5.25671	12.8785	2.22338e-16	1.81365e-13		GABARAPL1	-2.40425	8.59909	-12.1663	1.54128e-15	7.53438e-13
TRIM5	1.23584	4.76181	12.878	2.22606e-16	1.81365e-13		PMAIP1	-1.83025	8.85435	-12.1047	1.82787e-15	8.76016e-13
RNASEL	1.19546	5.72942	12.7989	2.75183e-16	2.03819e-13		AREG	-2.57771	6.00779	-11.9981	2.45747e-15	1.13331e-12
TNFSF10	2.2887	7.42824	12.7828	2.87335e-16	2.0656e-13		GZF1	-1.97739	6.72105	-11.8816	3.40253e-15	1.40222e-12
CD180	1.1433	6.48088	12.6093	4.58751e-16	3.20366e-13		RIPK2	-1.57363	7.98445	-11.6514	6.50456e-15	2.41594e-12
ATG4C	1.22284	4.81345	12.5764	5.01471e-16	3.40471e-13		MOAP1	-1.19493	9.30194	-11.6402	6.71403e-15	2.41594e-12
RP11-732A19.1	1.31527	4.53964	12.4421	7.22729e-16	4.42688e-13		CSRNP1	-1.91396	8.15104	-11.6398	6.72138e-15	2.41594e-12
ACTL6A	2.05754	5.77403	12.2941	1.08381e-15	6.30726e-13		CCDC59	-1.06095	8.93939	-11.5499	8.67538e-15	2.90471e-12
LOC100505812	1.70891	6.55085	12.2762	1.13841e-15	6.47094e-13		SIK1	-1.93903	7.87266	-11.496	1.01127e-14	3.25228e-12
NDUFAF1	1.54382	5.14441	12.2562	1.20288e-15	6.68201e-13		PFKFB3	-2.23334	8.42046	-11.3765	1.42287e-14	4.1901e-12
TP53	1.14686	5.56984	12.2318	1.28659e-15	6.98816e-13		CLK1	-1.2926	9.77027	-11.3668	1.46304e-14	4.25709e-12
FAM114A2	1.05162	5.32484	11.9982	2.45682e-15	1.13331e-12		NR4A2	-2.76425	9.13289	-11.3483	1.54301e-14	4.43697e-12
GIMAP6	2.49407	7.58269	11.9557	2.76615e-15	1.2508e-12		DDIT4	-1.50426	9.88816	-11.2208	2.22679e-14	5.72918e-12
SEC23IP	1.03206	5.54609	11.9495	2.81457e-15	1.2508e-12		ZFP36	-1.32783	10.982	-11.0524	3.62642e-14	8.13183e-12
LOC100996412	1.83333	7.32868	11.9278	2.99037e-15	1.30519e-12		CTD-3222D19.5	-1.00281	7.24183	-10.9436	4.97865e-14	1.06744e-11
TXNDC9	1.26839	6.78272	11.8941	3.28557e-15	1.40222e-12		PTS	-1.26239	7.2002	-10.8237	7.07469e-14	1.37238e-11
CDK2AP2	1.2008	6.33045	11.8858	3.3628e-15	1.40222e-12		CD83	-2.28271	9.52873	-10.7709	8.2617e-14	1.4958e-11
CRYBG3	1.14349	5.62049	11.8775	3.44217e-15	1.40222e-12		NFIL3	-1.77063	8.41089	-10.7621	8.48014e-14	1.52406e-11
GIMAP1-GIMAP5	1.46641	7.50735	11.702	5.63756e-15	2.18719e-12		JMJD6	-1.45689	7.44331	-10.586	1.42729e-13	2.28869e-11
GIMAP5	1.46641	7.50735	11.702	5.63756e-15	2.18719e-12		SMAD7	-2.29633	7.52308	-10.5847	1.43266e-13	2.28869e-11
TLR8	2.07851	7.33337	11.6001	7.52341e-15	2.57347e-12		PIGA	-1.42297	6.53709	-10.5744	1.47697e-13	2.3141e-11
PREB	1.03887	6.48258	11.5974	7.5808e-15	2.57347e-12		SKIL	-2.51817	7.83167	-10.5702	1.49566e-13	2.32537e-11
DCP1B	1.43329	5.51762	11.5118	9.66758e-15	3.18354e-12		RP11-469M7.1	-1.53545	7.86203	-10.5664	1.5127e-13	2.32537e-11
HIBCH	1.51579	5.50822	11.5082	9.76865e-15	3.18354e-12		GRASP	-1.12964	7.51689	-10.4763	1.97804e-13	2.84396e-11
TRANK1	1.16005	6.57792	11.4235	1.2438e-14	3.89754e-12		RGS1	-2.662	8.65895	-10.392	2.54392e-13	3.53286e-11
FPGT	1.41062	4.72259	11.3929	1.35758e-14	4.12729e-12		OSM	-2.18404	7.48438	-10.3803	2.63469e-13	3.57866e-11
RMI1	1.05857	4.91162	11.3434	1.56454e-14	4.44658e-12		LOC101928927	-1.04307	7.70784	-10.3802	2.63546e-13	3.57866e-11
MED11	1.07114	6.43993	11.2992	1.77625e-14	4.93353e-12		SNHG15	-1.04307	7.70784	-10.3802	2.63546e-13	3.57866e-11
LACTB2	1.36863	5.05214	11.2694	1.93526e-14	5.31479e-12		SNORA9	-1.04307	7.70784	-10.3802	2.63546e-13	3.57866e-11
SLC38A9	1.34185	5.87947	11.2635	1.96877e-14	5.34673e-12		CTA-29F11.1	-2.42178	7.08937	-10.2817	3.54165e-13	4.39416e-11
SPOP	1.19036	7.03754	11.2213	2.2233e-14	5.72918e-12		TIPARP	-1.32736	8.85404	-10.2691	3.67837e-13	4.51792e-11
LOC283357	2.17419	5.10993	11.2073	2.31528e-14	5.8948e-12		JOSD1	-1.34775	9.27809	-10.2591	3.79115e-13	4.52016e-11
AL833181	1.35481	6.06269	11.1981	2.37725e-14	5.99019e-12		CXCL8	-4.17525	9.96771	-10.2489	3.90902e-13	4.61566e-11
CTR9	1.20638	8.02578	11.1411	2.80315e-14	6.65189e-12		C9orf38	-1.33837	4.93973	-10.2184	4.28576e-13	4.91796e-11
SAC3D1	1.16321	4.53467	11.0575	3.5733e-14	8.0869e-12		SLC2A3	-1.74272	8.98496	-10.1412	5.41076e-13	5.90401e-11
TTI1	1.10594	5.58743	10.9437	4.97804e-14	1.06744e-11		MIR6883	-1.05262	8.36816	-10.1008	6.11471e-13	6.49807e-11
SAMD9L	1.72313	5.92162	10.9344	5.11554e-14	1.08725e-11		PER1	-1.05262	8.36816	-10.1008	6.11471e-13	6.49807e-11
NIF3L1	1.25446	6.40036	10.9255	5.2494e-14	1.10299e-11		SLC2A14	-1.87981	8.75506	-9.99805	8.35356e-13	8.4721e-11
GIN1	1.14255	4.58164	10.9235	5.27986e-14	1.10299e-11		ZBTB10	-1.35682	5.68705	-9.96299	9.2947e-13	9.23501e-11
ETNK1	1.45639	6.00418	10.8914	5.80117e-14	1.16915e-11		PLAUR	-2.08142	8.68048	-9.87345	1.2217e-12	1.13109e-10
C11orf48	1.05598	7.14848	10.8902	5.82073e-14	1.16915e-11		SYAP1	-1.53602	8.35933	-9.81347	1.46799e-12	1.32892e-10
LOC102288414	1.05598	7.14848	10.8902	5.82073e-14	1.16915e-11		IDI1	-1.04401	8.46458	-9.67924	2.21793e-12	1.88231e-10
TICAM2	1.1167	5.86576	10.8306	6.93292e-14	1.35563e-11		SCML1	-1.69697	6.27706	-9.65319	2.4035e-12	2.00499e-10
MRPS28	1.10991	6.31155	10.8185	7.18301e-14	1.37946e-11		ZNF394	-1.20443	8.1066	-9.65136	2.41711e-12	2.00949e-10
LCORL	1.13955	5.51207	10.8028	7.52358e-14	1.41455e-11		RGPD1	-1.389	7.06799	-9.60378	2.79986e-12	2.23641e-10
RACGAP1	1.46485	4.5272	10.7906	7.79808e-14	1.45051e-11		RGPD2	-1.389	7.06799	-9.60378	2.79986e-12	2.23641e-10
LINC00324	1.29582	6.14555	10.7825	7.98627e-14	1.45672e-11		RP11-489E7.4	-1.38486	6.66024	-9.59688	2.86023e-12	2.27719e-10
PREPL	1.24213	5.74431	10.7528	8.71387e-14	1.55463e-11		MIR22	-1.70779	8.57173	-9.58761	2.94349e-12	2.30592e-10
VPS35	1.23126	7.25151	10.7384	9.09274e-14	1.61047e-11		MIR22HG	-1.70779	8.57173	-9.58761	2.94349e-12	2.30592e-10
RAB10	2.18374	7.85365	10.7133	9.79174e-14	1.7218e-11		PDE4B	-1.52819	8.30244	-9.58052	3.0087e-12	2.34199e-10
WDR7	1.088	5.63915	10.6807	1.07822e-13	1.85591e-11		VEGFA	-2.27223	7.57214	-9.50962	3.74816e-12	2.8408e-10
SH2D3C	1.03539	5.9563	10.6401	1.21553e-13	2.03493e-11		NFKBIA	-1.61956	10.85	-9.45513	4.43952e-12	3.2882e-10
GTF2E1	1.27748	5.8346	10.6109	1.32535e-13	2.1888e-11		ZNF331	-2.3762	8.92691	-9.45126	4.49341e-12	3.31807e-10
RP11-5C23.1	1.00751	5.34427	10.5468	1.6034e-13	2.4494e-11		HIF1A	-1.06756	11.124	-9.42482	4.87882e-12	3.5393e-10
IFI16	1.14906	8.74566	10.5194	1.73926e-13	2.59213e-11		DUSP1	-1.10257	10.9733	-9.39437	5.36436e-12	3.79908e-10
MRPS31	1.58519	6.19182	10.4932	1.8805e-13	2.76037e-11		KLHL15	-1.05113	7.35766	-9.31365	6.90209e-12	4.65326e-10
PTPN6	1.29965	8.95415	10.4789	1.96234e-13	2.83807e-11		RGPD3	-1.19947	7.69396	-9.2988	7.23025e-12	4.73785e-10
APAF1	1.02556	6.01531	10.4314	2.26142e-13	3.17664e-11		RGPD4	-1.19947	7.69396	-9.2988	7.23025e-12	4.73785e-10
DYNC1I2	1.39378	6.28288	10.3957	2.51646e-13	3.5147e-11		RGPD5	-1.19947	7.69396	-9.2988	7.23025e-12	4.73785e-10
SHQ1	1.04676	5.64401	10.3617	2.78591e-13	3.70072e-11		RGPD6	-1.19947	7.69396	-9.2988	7.23025e-12	4.73785e-10
TRIM34	1.05757	5.82772	10.3377	2.99365e-13	3.90448e-11		RGPD8	-1.19947	7.69396	-9.2988	7.23025e-12	4.73785e-10
TRIM6-TRIM34	1.05757	5.82772	10.3377	2.99365e-13	3.90448e-11		TFRC	-1.02776	7.71091	-9.28309	7.59474e-12	4.91003e-10
C5orf51	1.00397	5.33934	10.3366	3.0032e-13	3.90448e-11		SELK	-1.03328	9.5545	-9.25935	8.18099e-12	5.22088e-10
DDX60	2.18061	6.60838	10.3343	3.02437e-13	3.9112e-11		JUND	-1.0174	9.38839	-9.24788	8.48031e-12	5.38378e-10
MOSPD2	1.2103	6.42157	10.3283	3.07944e-13	3.96145e-11		FOSL2	-1.21262	7.69906	-9.21419	9.42569e-12	5.89214e-10
RNF14	1.00524	5.00942	10.3011	3.34097e-13	4.23109e-11		AK057657	-1.0671	9.91571	-9.09798	1.35862e-11	7.94433e-10
RPA4	1.13654	4.36752	10.2847	3.51003e-13	4.39416e-11		IRS2	-1.14888	9.27059	-9.01621	1.75888e-11	9.74841e-10
IRF2	2.05369	5.97483	10.2831	3.52668e-13	4.39416e-11		SLC25A33	-1.15296	7.20322	-9.00855	1.80199e-11	9.89759e-10
PPIL1	1.5107	5.21459	10.279	3.57117e-13	4.40841e-11		RIT1	-1.25109	8.54958	-8.9885	1.92003e-11	1.03369e-09
FAM217B	1.00823	6.6974	10.2606	3.77428e-13	4.52016e-11		NUPL1	-1.20881	7.9351	-8.97958	1.97501e-11	1.06095e-09
DDX58	1.00585	6.00447	10.2556	3.83139e-13	4.54596e-11		MASTL	-1.12357	5.41603	-8.88749	2.645e-11	1.33023e-09
SYNRG	1.22022	6.76921	10.2273	4.1721e-13	4.83426e-11		SLC19A2	-1.10307	5.23047	-8.86786	2.81528e-11	1.39251e-09
ZNF260	1.28129	4.65289	10.2231	4.22509e-13	4.87121e-11		BHLHE40	-1.40376	8.60743	-8.8622	2.86636e-11	1.39251e-09
OAS1	1.89157	6.25743	10.1979	4.55906e-13	5.13514e-11		CDKN1A	-1.57368	9.17816	-8.8215	3.26276e-11	1.56064e-09
NUDCD1	1.04818	5.18022	10.1846	4.74617e-13	5.29707e-11		GADD45B	-1.5428	8.17045	-8.81687	3.31116e-11	1.57454e-09
NAGK	1.35061	8.46428	10.1239	5.70116e-13	6.14608e-11		CTB-31O20.2	-1.15386	7.89119	-8.70799	4.68675e-11	2.06754e-09
C9orf69	1.16567	6.1365	10.0639	6.83953e-13	7.16996e-11		EREG	-2.46196	6.50382	-8.70535	4.7265e-11	2.07779e-09
FAM98B	1.01258	5.94594	10.0443	7.25708e-13	7.50468e-11		LINC-PINT	-1.34188	7.47395	-8.69915	4.82111e-11	2.10801e-09
GIMAP7	1.84934	8.08965	10.0434	7.27686e-13	7.50468e-11		NAMPT	-1.46772	10.5778	-8.67439	5.21867e-11	2.24964e-09
SP4	1.13116	7.26592	9.99337	8.4734e-13	8.55813e-11		TP53INP2	-1.38792	7.37409	-8.65099	5.62465e-11	2.39884e-09
IDH1	1.91565	6.04012	9.97383	8.99279e-13	8.9715e-11		SLC7A5	-2.12753	7.7159	-8.64038	5.81919e-11	2.46576e-09
MGC70870	1.09706	3.74511	9.95991	9.38255e-13	9.28454e-11		NLRP3	-1.61212	6.65405	-8.44808	1.07977e-10	4.09809e-09
PVRIG	1.09248	7.18282	9.95048	9.65599e-13	9.40286e-11		PELI1	-1.01194	9.82179	-8.42988	1.14505e-10	4.29912e-09
PCMT1	1.26448	7.8746	9.94251	9.89372e-13	9.5582e-11		ETV3	-1.12924	7.4397	-8.38234	1.33501e-10	4.88479e-09
LFNG	1.0037	6.46327	9.9181	1.06588e-12	1.0137e-10		YPEL5	-1.1415	10.8252	-8.3584	1.44247e-10	5.20779e-09
MGME1	1.14663	6.48358	9.91652	1.07103e-12	1.01466e-10		IFRD1	-1.21876	7.66337	-8.30739	1.70137e-10	5.94919e-09
COA3	1.38641	6.576	9.91062	1.09048e-12	1.02909e-10		STARD4	-1.06784	7.69335	-8.28926	1.8043e-10	6.25543e-09
SGK223	1.55035	6.20528	9.90378	1.11351e-12	1.04679e-10		PIK3IP1	-1.01484	9.15201	-8.28077	1.85469e-10	6.39384e-09
AHSA1	1.03653	7.49552	9.89372	1.14827e-12	1.07533e-10		MIR6732	-1.52221	7.62465	-8.25149	2.03943e-10	6.97172e-09
JKAMP	1.01212	6.46919	9.8748	1.21663e-12	1.13068e-10		ZC3H12A	-1.52221	7.62465	-8.25149	2.03943e-10	6.97172e-09
CYSLTR1	1.20538	6.08427	9.85771	1.28196e-12	1.1824e-10		EAF1	-1.2157	8.10253	-8.20596	2.36436e-10	7.90557e-09
SUCLA2	1.40288	5.93745	9.85199	1.3046e-12	1.1905e-10		IER3	-2.46493	9.34227	-8.19424	2.45609e-10	8.14541e-09
TMEM69	1.29845	6.89165	9.82639	1.41101e-12	1.28208e-10		PLK3	-1.14819	6.95541	-8.18927	2.49614e-10	8.24186e-09
MAT2B	1.11233	8.46058	9.76254	1.71641e-12	1.53145e-10		DDIT3	-1.5456	7.75956	-8.10427	3.29169e-10	1.03546e-08
HERC4	1.09171	5.32191	9.75352	1.76465e-12	1.56735e-10		WHAMM	-1.39516	7.69617	-8.08417	3.51462e-10	1.09016e-08
CNOT6	1.09264	6.97307	9.7169	1.97502e-12	1.70577e-10		ATF3	-1.8401	6.90436	-8.05135	3.91181e-10	1.18332e-08
PEX11B	1.25122	6.35299	9.71199	2.00511e-12	1.72567e-10		NFKBIE	-1.17971	7.23905	-8.04479	3.99642e-10	1.20444e-08
HMG20A	1.12912	6.47236	9.70829	2.02807e-12	1.7393e-10		CCNH	-1.2324	8.60712	-8.03465	4.13093e-10	1.23584e-08
LOC101927204	1.15041	5.12421	9.70537	2.04638e-12	1.74887e-10		THBD	-2.35939	6.19043	-7.98512	4.85657e-10	1.4132e-08
GALNT7	1.58339	6.24449	9.67226	2.26621e-12	1.91003e-10		SGK1	-1.67859	9.91464	-7.9715	5.07786e-10	1.45673e-08
COG6	1.24301	5.02324	9.66715	2.30222e-12	1.93371e-10		ZBTB21	-1.24712	8.12382	-7.90363	6.3415e-10	1.76135e-08
ATP6V1C1	1.17562	5.45877	9.66367	2.32705e-12	1.94787e-10		C12orf79	-1.2988	4.80314	-7.82896	8.10141e-10	2.16992e-08
DTX3L	1.22754	8.5042	9.64816	2.4411e-12	2.0175e-10		RAB20	-1.00723	7.27928	-7.82221	8.28294e-10	2.20776e-08
GOLPH3L	1.45714	6.03157	9.63067	2.57656e-12	2.12041e-10		TRIB1	-1.70528	7.54684	-7.80186	8.85568e-10	2.34508e-08
IPO8	1.13552	6.53827	9.62087	2.65575e-12	2.17825e-10		OTUD1	-1.17214	7.64774	-7.798	8.96868e-10	2.37243e-08
SLC46A2	1.12739	5.20919	9.61599	2.6961e-12	2.1893e-10		BRE-AS1	-1.87669	5.4601	-7.72085	1.15598e-09	2.93102e-08
FUNDC1	1.22103	5.5218	9.61252	2.72519e-12	2.2056e-10		DOCK4	-1.98653	5.25022	-7.6486	1.4667e-09	3.57775e-08
VPS72	1.00478	5.98056	9.60868	2.75774e-12	2.22458e-10		CD69	-1.12693	10.821	-7.5968	1.74016e-09	4.12141e-08
TSNAX	1.18324	7.96063	9.60642	2.7771e-12	2.23283e-10		ID1	-1.80661	5.96681	-7.5706	1.89748e-09	4.41697e-08
OSBPL11	1.20371	6.83302	9.58972	2.92427e-12	2.30565e-10		ARL4A	-1.34348	7.75794	-7.55297	2.01132e-09	4.64656e-08
UNG	1.11507	5.18715	9.56421	3.16457e-12	2.44773e-10		ZBTB43	-1.28184	7.24281	-7.48799	2.49366e-09	5.61752e-08
RP11-395B7.7	1.29931	6.39006	9.53986	3.41258e-12	2.62297e-10		DUSP2	-1.07401	9.23085	-7.46375	2.70208e-09	6.04246e-08
ZNF146	1.25212	6.92418	9.50392	3.81508e-12	2.87803e-10		NR4A3	-1.70008	6.15461	-7.45731	2.76031e-09	6.15427e-08
FASTKD1	1.38437	6.20258	9.46414	4.31693e-12	3.2169e-10		DNAJB1	-1.01617	9.11016	-7.26823	5.16998e-09	1.04867e-07
MINA	1.14479	5.90217	9.43598	4.71219e-12	3.46914e-10		DUSP10	-1.52141	7.25106	-7.22935	5.88378e-09	1.15977e-07
MTIF3	1.25802	5.81516	9.43068	4.79054e-12	3.5057e-10		SAMSN1	-1.23363	8.49852	-7.22762	5.91776e-09	1.16553e-07
LOC100505549	1.12828	6.05383	9.40434	5.20012e-12	3.73857e-10		ZNF791	-1.05885	8.43437	-7.07334	9.89439e-09	1.82108e-07
SLC35B3	1.34478	5.43944	9.40285	5.22438e-12	3.73857e-10		MAP3K8	-1.40269	8.31595	-7.05504	1.05175e-08	1.91442e-07
C6orf211	1.73277	6.53262	9.40184	5.2409e-12	3.73857e-10		RASGEF1B	-1.4773	5.53371	-7.05041	1.06812e-08	1.93673e-07
ARFIP1	1.63749	5.58361	9.40105	5.25371e-12	3.73857e-10		CREM	-1.71508	7.41249	-7.01212	1.21374e-08	2.15285e-07
ICAM2	1.36496	8.69018	9.38079	5.59634e-12	3.9172e-10		IER5	-1.11639	10.2905	-6.98463	1.33045e-08	2.32443e-07
ZNF623	1.00257	4.32208	9.37229	5.74665e-12	4.0017e-10		JUNB	-1.02002	10.1231	-6.91117	1.70064e-08	2.87463e-07
NEK7	1.49034	8.68359	9.34142	6.32811e-12	4.35695e-10		RANBP2	-1.01242	8.22861	-6.91004	1.70712e-08	2.88018e-07
GAPT	2.08522	6.19557	9.33991	6.35812e-12	4.36453e-10		PHACTR1	-1.76113	7.04589	-6.87192	1.93921e-08	3.20041e-07
GBP3	1.68033	6.55227	9.33534	6.44949e-12	4.39104e-10		CCL3	-2.03758	8.68758	-6.86526	1.9829e-08	3.25509e-07
CARD6	1.18216	6.35915	9.32345	6.69368e-12	4.54464e-10		CCL3L1	-2.03758	8.68758	-6.86526	1.9829e-08	3.25509e-07
CTC-444N24.11	1.20037	5.92539	9.28532	7.54182e-12	4.88958e-10		CCL3L3	-2.03758	8.68758	-6.86526	1.9829e-08	3.25509e-07
PCYOX1	1.06629	5.59719	9.28175	7.62649e-12	4.91003e-10		FCAR	-1.43225	5.86233	-6.83863	2.16768e-08	3.50645e-07
TRAPPC6B	1.43475	5.94818	9.27988	7.67127e-12	4.92129e-10		NFKB2	-1.1549	6.56194	-6.77643	2.66947e-08	4.18251e-07
PAQR8	1.10892	6.09567	9.2393	8.71172e-12	5.51637e-10		RGCC	-1.94385	8.5814	-6.75643	2.85443e-08	4.42409e-07
RIN2	1.08162	6.29392	9.21625	9.3651e-12	5.86928e-10		LINC00936	-1.34278	9.31916	-6.66237	3.91204e-08	5.76594e-07
CPOX	1.22762	5.86402	9.20314	9.7587e-12	6.05386e-10		TNFRSF21	-1.09932	5.30699	-6.59711	4.86894e-08	7.0169e-07
NACC2	1.0145	6.04975	9.18498	1.03316e-11	6.33425e-10		ADM	-2.03309	7.45246	-6.59198	4.95343e-08	7.10931e-07
AMMECR1	1.01537	5.87997	9.17923	1.05199e-11	6.41213e-10		SNX9	-1.37433	7.4158	-6.585	5.0708e-08	7.24798e-07
ISOC1	1.00248	6.54988	9.17469	1.06711e-11	6.48812e-10		PPIF	-1.93977	8.55361	-6.57508	5.24236e-08	7.44531e-07
RP11-4O1.2	1.01772	5.01637	9.14961	1.1547e-11	6.96871e-10		BCL2A1	-1.56738	10.2356	-6.38465	9.9327e-08	1.26709e-06
GTF2H1	1.13019	5.42506	9.13265	1.21802e-11	7.29675e-10		FOS	-1.52983	10.7104	-6.38377	9.9618e-08	1.27014e-06
MCM3	1.01303	6.90252	9.11871	1.27267e-11	7.55014e-10		ELL2	-1.52865	6.41931	-6.25137	1.55378e-07	1.84447e-06
MRPL51	1.04528	7.18052	9.11119	1.3032e-11	7.65693e-10		FOSB	-2.43004	8.27214	-6.18007	1.97397e-07	2.26515e-06
LOC101930324	1.243	7.32081	9.0699	1.48446e-11	8.49327e-10		GPR183	-1.37402	9.49346	-6.12921	2.34144e-07	2.62883e-06
CASP8AP2	1.49614	5.482	9.06613	1.50223e-11	8.55884e-10		PPP1R15A	-1.6083	8.22021	-6.12351	2.38666e-07	2.67345e-06
PTER	1.52695	6.65655	9.03474	1.65877e-11	9.35409e-10		ERMN	-1.01013	5.35521	-6.08528	2.71336e-07	2.98201e-06
BRI3BP	1.294	6.41428	9.03433	1.66094e-11	9.35409e-10		MXD1	-1.25393	7.85452	-6.0739	2.81905e-07	3.08568e-06
PARP1	1.10795	7.05432	9.0321	1.67269e-11	9.39861e-10		RP6-99M1.2	-1.00672	3.78167	-6.06465	2.90791e-07	3.16452e-06
DENND2D	1.38104	7.01348	9.00332	1.83204e-11	9.99524e-10		SC5D	-1.25356	6.36495	-5.98767	3.76472e-07	3.96115e-06
ZMYM6NB	1.56629	6.7735	9.00102	1.84542e-11	1.00458e-09		B3GNT5	-1.75925	6.58356	-5.91972	4.72794e-07	4.811e-06
CLCN3	1.11289	6.07895	8.99742	1.86657e-11	1.01384e-09		KBTBD8	-1.26498	6.45831	-5.88877	5.24456e-07	5.26574e-06
RNF20	1.55641	7.49201	8.96918	2.04116e-11	1.0893e-09		GAFA1	-1.12701	4.53075	-5.87681	5.45909e-07	5.45954e-06
SNX1	1.01553	6.96074	8.95455	2.138e-11	1.1238e-09		JAG1	-1.12079	5.04806	-5.85444	5.88382e-07	5.80825e-06
NUP43	1.28019	6.37557	8.95204	2.1551e-11	1.12839e-09		NINJ1	-1.20092	8.32947	-5.83816	6.21363e-07	6.07737e-06
SAMD9	1.51984	6.09553	8.94272	2.21971e-11	1.15928e-09		DUSP4	-1.37276	5.60935	-5.79977	7.06575e-07	6.80193e-06
CLOCK	1.15244	6.61309	8.94174	2.22659e-11	1.16039e-09		ICAM1	-1.05517	6.81974	-5.76402	7.96391e-07	7.55938e-06
TLR5	1.42363	6.41758	8.92724	2.33137e-11	1.21241e-09		ACSL1	-1.21507	8.9543	-5.74146	8.58817e-07	8.04878e-06
KLHL8	1.02812	6.76931	8.92566	2.34308e-11	1.21592e-09		CXCL2	-2.30207	5.46282	-5.58922	1.42813e-06	1.24799e-05
GBP1	1.59153	7.6156	8.9217	2.37276e-11	1.22871e-09		SNORD3A	-1.42804	5.88531	-5.4806	2.05104e-06	1.70923e-05
SKA2	1.27094	6.08443	8.92072	2.38014e-11	1.22992e-09		SNORD3B-1	-1.42804	5.88531	-5.4806	2.05104e-06	1.70923e-05
PIGF	1.15656	6.30899	8.91992	2.38617e-11	1.23044e-09		SNORD3B-2	-1.42804	5.88531	-5.4806	2.05104e-06	1.70923e-05
C11orf54	1.24908	6.00565	8.91417	2.4301e-11	1.24783e-09		SNORD3C	-1.42804	5.88531	-5.4806	2.05104e-06	1.70923e-05
DNAJC24	1.12366	5.27924	8.90906	2.46989e-11	1.25769e-09		SNORD3D	-1.42804	5.88531	-5.4806	2.05104e-06	1.70923e-05
TRG-AS1	1.72779	7.58761	8.89506	2.58211e-11	1.30397e-09		RAB33A	-1.01564	5.40718	-5.44533	2.30645e-06	1.89303e-05
CBR4	1.23575	6.23314	8.89138	2.61254e-11	1.31661e-09		KLF4	-1.00413	9.47875	-5.41572	2.54507e-06	2.06529e-05
GPR171	1.47069	7.05638	8.87103	2.787e-11	1.39205e-09		C15orf48	-2.69096	5.45812	-5.37829	2.88207e-06	2.30509e-05
ATF1	1.20464	6.58389	8.8705	2.79173e-11	1.39205e-09		TUBB2A	-1.04025	6.64348	-5.36053	3.05705e-06	2.42993e-05
AGL	1.27514	7.12498	8.8646	2.84455e-11	1.39251e-09		RP1-151F17.2	-1.15821	4.82037	-5.30437	3.68297e-06	2.86848e-05
P2RY14	1.48968	5.28463	8.83667	3.10891e-11	1.50174e-09		NRIP3	-1.23885	6.25483	-5.2328	4.6675e-06	3.52761e-05
DMXL1	1.65174	6.28634	8.82822	3.19367e-11	1.53359e-09		CXCL16	-1.01649	7.82226	-5.15638	6.00745e-06	4.37919e-05
SLC35A5	1.70388	6.12059	8.82528	3.22373e-11	1.54499e-09		HCAR3	-2.02418	7.79017	-5.09475	7.36018e-06	5.23993e-05
SACS	1.29115	6.22516	8.8202	3.2763e-11	1.56405e-09		PLK2	-1.4139	4.64632	-5.02127	9.37076e-06	6.48104e-05
TDRD7	1.0198	6.17271	8.80382	3.45179e-11	1.63823e-09		IL1B	-2.14789	8.27614	-4.96402	1.13054e-05	7.62067e-05
ATG16L2	1.02525	7.52132	8.76121	3.95412e-11	1.8255e-09		AX747826	-1.12127	7.27342	-4.89079	1.43636e-05	9.41004e-05
PDHB	1.12587	7.55134	8.76035	3.96497e-11	1.8255e-09		SERPINB2	-1.98064	5.626	-4.87719	1.50156e-05	9.76871e-05
RNF111	1.02865	7.26213	8.75559	4.02567e-11	1.84607e-09		THBS1	-1.28834	6.95949	-4.77524	2.09233e-05	0.000131265
HLTF	1.23291	5.85712	8.74414	4.17555e-11	1.90116e-09		TREM1	-1.18021	8.62213	-4.61727	3.48688e-05	0.000205513
ASF1A	1.36769	6.56483	8.74345	4.1847e-11	1.90116e-09		MN1	-1.05111	4.54731	-4.50045	5.07226e-05	0.000285331
C9orf41	1.14925	5.23128	8.73799	4.25843e-11	1.93107e-09		MIR155	-1.0219	4.6286	-4.4599	5.77325e-05	0.000319687
OAS2	1.05802	6.37713	8.73642	4.27974e-11	1.93714e-09		MIR155HG	-1.0219	4.6286	-4.4599	5.77325e-05	0.000319687
GIMAP1	1.44584	7.40345	8.73561	4.29083e-11	1.93857e-09		GPR84	-1.27208	5.3837	-4.34647	8.27747e-05	0.000438974
PHF6	1.24129	5.98894	8.70347	4.755e-11	2.08656e-09		CCL20	-1.42598	5.66731	-4.18656	0.000136878	0.000683189
CTBP2	1.20867	7.91385	8.68876	4.98403e-11	2.16376e-09		IFNG	-1.18396	6.1253	-4.02684	0.000224769	0.00104904
SOS1	1.19036	6.07653	8.68746	5.00479e-11	2.16508e-09		RP11-373D23.2	-1.03144	7.63394	-3.98299	0.000257253	0.0011821
LRIF1	1.71496	4.9817	8.66524	5.37379e-11	2.30837e-09		PHLDA1	-1.10996	5.79588	-3.9499	0.000284727	0.00129523
COA4	1.02168	6.59079	8.6325	5.9679e-11	2.50631e-09		HIST2H2AA3	-1.1007	10.202	-3.94378	0.000290115	0.00131534
OMA1	1.48768	6.74983	8.62526	6.10807e-11	2.54333e-09		HIST2H2AA4	-1.1007	10.202	-3.94378	0.000290115	0.00131534
CRIM1	1.21811	5.97357	8.62421	6.12865e-11	2.54756e-09		HIST1H1C	-1.12154	7.19942	-3.8993	0.000332327	0.00147632
CREB1	1.11749	7.21778	8.6074	6.46807e-11	2.65702e-09		LGALS2	-1.07584	8.38821	-3.74418	0.000531221	0.00221496
PRKAR1A	1.07714	8.54797	8.59727	6.68171e-11	2.73101e-09		PTX3	-1.14151	5.27208	-3.72225	0.000567301	0.00234675
ATP11C	1.21273	5.26589	8.59002	6.83917e-11	2.77219e-09		CXCL3	-1.34404	4.63426	-3.67261	0.000657884	0.00267198
METTL18	1.29466	5.86363	8.58393	6.97402e-11	2.81285e-09		EGR3	-1.14103	5.5297	-3.58242	0.000859213	0.00335103
FRAT2	1.21525	7.13868	8.56667	7.37168e-11	2.96835e-09		OLR1	-1.67078	4.57268	-3.57709	0.000872815	0.00339649
NOC3L	1.27018	5.78002	8.56272	7.46573e-11	2.99143e-09		PTGS2	-1.59489	6.7673	-3.56633	0.000900862	0.00348786
ST6GAL1	1.27112	7.07098	8.55615	7.62501e-11	3.0403e-09		PLAU	-1.12667	5.61532	-3.3032	0.00192733	0.00666307
PRKACB	1.50529	8.10728	8.542	7.97973e-11	3.16624e-09		IL1R2	-1.10942	6.2445	-3.14101	0.00303807	0.00978735
TRPS1	1.0014	6.41459	8.53976	8.03747e-11	3.18398e-09
XPO1	1.23407	8.29209	8.52774	8.35411e-11	3.29873e-09
UBASH3A	1.19914	5.90286	8.52546	8.41568e-11	3.31768e-09
NNT-AS1	1.28915	4.94506	8.51458	8.71564e-11	3.41391e-09
LYRM7	1.1889	6.18084	8.49494	9.28437e-11	3.61928e-09
OXR1	1.03947	5.98511	8.48355	9.63132e-11	3.73072e-09
ARL15	1.21011	6.01194	8.45463	1.05721e-10	4.03126e-09
MINPP1	1.12007	3.97311	8.43795	1.11561e-10	4.221e-09
ASXL2	1.38032	7.04995	8.43126	1.13996e-10	4.28893e-09
SUV420H1	1.20921	6.84254	8.42781	1.15271e-10	4.32126e-09
STX7	1.09948	6.05562	8.41063	1.21844e-10	4.56066e-09
RAB28	1.11679	5.58742	8.40552	1.2387e-10	4.62234e-09
P2RY13	1.79532	6.3377	8.39219	1.29323e-10	4.8071e-09
DDX60L	1.20266	6.89819	8.39198	1.29411e-10	4.8071e-09
TCL1A	1.78642	6.6168	8.37093	1.3852e-10	5.03075e-09
DCK	1.44128	7.9386	8.35069	1.47888e-10	5.32355e-09
GOLGA5	1.01753	6.92309	8.34879	1.48798e-10	5.33272e-09
ANKRD27	1.04364	7.12005	8.33998	1.53103e-10	5.46074e-09
ZNF559	1.66596	6.08498	8.33202	1.57097e-10	5.55684e-09
FGD4	1.66778	5.7275	8.32831	1.58996e-10	5.61587e-09
MRFAP1L1	1.08963	8.07711	8.24563	2.07859e-10	7.06605e-09
MNDA	2.1937	9.80776	8.23942	2.12088e-10	7.18981e-09
TMEM87B	1.19347	6.47834	8.22038	2.25613e-10	7.56439e-09
ARHGAP30	1.04481	8.64647	8.19895	2.41884e-10	8.0437e-09
TMEM260	1.22822	6.72588	8.19672	2.43638e-10	8.09102e-09
COQ5	1.1371	6.05873	8.18395	2.53965e-10	8.32092e-09
LMBRD2	1.12034	5.42991	8.17942	2.57737e-10	8.42192e-09
LINC00998	1.14773	5.65938	8.16859	2.66974e-10	8.62397e-09
TMX3	1.18764	6.32237	8.1544	2.79585e-10	8.97977e-09
PHF14	1.40471	5.5241	8.1537	2.80222e-10	8.98842e-09
MDM1	1.18936	5.5769	8.1442	2.89023e-10	9.24648e-09
CMTR2	1.33717	6.34776	8.11769	3.15087e-10	9.95006e-09
C16orf52	1.03525	5.87408	8.0969	3.37174e-10	1.05386e-08
MEF2C	1.43399	7.03558	8.07811	3.5847e-10	1.10488e-08
RPA3OS	1.27193	4.94275	8.07259	3.64979e-10	1.12164e-08
USO1	1.07154	7.10989	8.06841	3.69997e-10	1.13185e-08
LBH	1.23876	7.58351	8.06682	3.71917e-10	1.1363e-08
LOC101930115	1.0789	6.21514	8.03658	4.10492e-10	1.22956e-08
C17orf62	1.67457	6.4802	8.02178	4.30821e-10	1.27793e-08
SGMS2	1.07158	5.21936	8.0164	4.38466e-10	1.29589e-08
PYHIN1	1.52148	7.24414	7.99667	4.67662e-10	1.37222e-08
VPS36	1.18656	6.52045	7.98812	4.8093e-10	1.40609e-08
SMARCAL1	1.07497	6.06703	7.98212	4.90451e-10	1.42033e-08
TMEM106B	1.06022	7.2643	7.97207	5.06835e-10	1.45664e-08
GALK2	1.24246	5.42955	7.96441	5.197e-10	1.48376e-08
MIB1	1.10403	6.13926	7.96293	5.22229e-10	1.48768e-08
OIP5-AS1	1.24483	7.19216	7.94347	5.56568e-10	1.56972e-08
HDHD1	1.0346	6.78834	7.92319	5.94781e-10	1.66334e-08
RECQL	1.18528	7.60444	7.90976	6.21524e-10	1.73219e-08
SLC16A7	1.14731	5.84405	7.88733	6.68953e-10	1.83917e-08
MKKS	1.09052	5.77539	7.88121	6.82507e-10	1.87226e-08
RP11-747H7.3	1.52794	6.00625	7.87413	6.98538e-10	1.90981e-08
GBE1	1.01555	6.2244	7.87201	7.03399e-10	1.9188e-08
EDEM3	1.09804	6.86319	7.86203	7.26821e-10	1.97608e-08
TIGIT	1.11211	6.38854	7.82524	8.20097e-10	2.19231e-08
CTD-2292M16.8	1.00524	4.95961	7.81523	8.47515e-10	2.25653e-08
SHPRH	1.24405	5.85545	7.80306	8.82073e-10	2.34089e-08
ARHGEF3	1.08078	8.70647	7.76959	9.84679e-10	2.56857e-08
TIMMDC1	1.2746	6.98888	7.74577	1.06492e-09	2.74855e-08
CHST15	1.04755	7.27103	7.74538	1.06629e-09	2.74918e-08
ZNF217	1.10634	7.65619	7.72947	1.12363e-09	2.87578e-08
LOC284837	1.21686	6.23261	7.72274	1.14881e-09	2.92491e-08
ZNF140	1.04569	4.73939	7.7207	1.15654e-09	2.93102e-08
ANKRD17	1.12143	7.27464	7.71875	1.164e-09	2.94214e-08
TAF4	1.11288	5.95254	7.68718	1.29156e-09	3.23778e-08
STK39	1.35635	6.64252	7.67317	1.35257e-09	3.36311e-08
TRIT1	1.02067	6.39844	7.66749	1.37812e-09	3.41278e-08
NDUFA8	1.144	6.96928	7.66162	1.40509e-09	3.45506e-08
HIATL1	1.09185	6.70169	7.65892	1.41763e-09	3.47889e-08
HSD17B4	1.53062	6.10896	7.61524	1.63739e-09	3.91978e-08
PBRM1	1.02822	6.51874	7.59231	1.76616e-09	4.16683e-08
BET1	1.06725	5.88231	7.59042	1.77723e-09	4.18489e-08
DPYD	1.27198	7.44314	7.58823	1.79016e-09	4.21007e-08
RPA2	1.07157	7.52753	7.58774	1.79303e-09	4.21007e-08
UFSP2	1.02049	6.19073	7.5853	1.80751e-09	4.23984e-08
RAB27B	1.41987	6.13624	7.58239	1.825e-09	4.27651e-08
MARCH1	1.44776	6.94581	7.57254	1.88534e-09	4.40129e-08
SLC35A1	1.7352	7.85367	7.57074	1.89663e-09	4.41697e-08
MSH2	1.25644	5.8366	7.56268	1.94781e-09	4.52121e-08
PSMB8-AS1	1.25491	7.4741	7.53225	2.15395e-09	4.93409e-08
AJ420595	1.25349	5.32088	7.51442	2.28477e-09	5.19966e-08
CCR5	1.27963	7.97982	7.51407	2.28748e-09	5.20098e-08
ACADM	1.87977	6.78552	7.48981	2.47865e-09	5.59401e-08
mir-223	1.37034	6.75761	7.43611	2.9612e-09	6.5441e-08
SLAMF7	1.14961	6.45832	7.43324	2.98942e-09	6.57081e-08
CARD8	1.04314	6.93957	7.40657	3.26576e-09	7.08107e-08
ATP10D	1.66499	5.81589	7.37539	3.62167e-09	7.73784e-08
THEMIS	2.08582	6.58309	7.36633	3.73218e-09	7.93234e-08
NFE2	1.36981	6.03097	7.35503	3.87489e-09	8.20399e-08
ATL3	1.01204	6.58283	7.35488	3.87677e-09	8.20399e-08
PCNA	1.10364	7.05316	7.32758	4.24461e-09	8.89004e-08
PTGER2	1.29517	7.51496	7.32623	4.2636e-09	8.92217e-08
SLC25A20	1.01499	6.75034	7.28986	4.81132e-09	9.87391e-08
ZNF678	1.05612	4.77232	7.28261	4.92861e-09	1.00808e-07
LRRN3	1.37897	6.27825	7.28079	4.9585e-09	1.01249e-07
TRMT13	1.3452	5.94991	7.2619	5.28004e-09	1.06305e-07
SMCO4	1.49402	7.12255	7.23721	5.73179e-09	1.13807e-07
LOC101930059	1.28345	6.50135	7.23406	5.79228e-09	1.14543e-07
CRNKL1	1.10398	5.1244	7.22416	5.98621e-09	1.17806e-07
KRCC1	1.57097	6.73363	7.20718	6.33416e-09	1.23559e-07
SIRPB2	1.18336	6.38994	7.19889	6.51149e-09	1.26413e-07
ESYT1	1.22918	8.0987	7.1942	6.61405e-09	1.28099e-07
MITD1	1.28043	7.15127	7.17986	6.93742e-09	1.33621e-07
GCA	1.66967	8.46808	7.15161	7.62205e-09	1.44866e-07
CBX1	1.1868	7.32067	7.15004	7.6619e-09	1.45285e-07
GLB1	1.00246	7.65891	7.14298	7.84435e-09	1.48399e-07
TMPPE	1.00246	7.65891	7.14298	7.84435e-09	1.48399e-07
COMMD8	1.1843	8.4657	7.10833	8.80463e-09	1.64402e-07
EEA1	1.27048	4.95986	7.04333	1.09365e-08	1.97423e-07
BAZ2B	1.05919	6.30489	7.03953	1.10761e-08	1.99501e-07
GVINP1	1.39837	6.31641	7.03721	1.11621e-08	2.00541e-07
UGDH	1.05096	6.08511	7.0291	1.14686e-08	2.05509e-07
SLC27A3	1.01412	6.805	7.01611	1.19767e-08	2.12897e-07
MSANTD2	1.17131	6.27053	7.01522	1.20125e-08	2.13379e-07
PTGDR	1.41133	5.24518	7.00369	1.24841e-08	2.20211e-07
TRAPPC12	1.17482	6.28606	6.96113	1.43909e-08	2.4911e-07
ECHDC1	1.24496	6.93816	6.92835	1.60573e-08	2.74265e-07
MPLKIP	1.05735	7.28604	6.91058	1.70405e-08	2.87839e-07
ACN9	1.1578	5.42206	6.90408	1.74145e-08	2.9254e-07
SMIM14	1.2797	6.20067	6.8979	1.77784e-08	2.97629e-07
KCTD12	1.33941	9.15603	6.86672	1.97326e-08	3.24784e-07
CRYZ	1.38654	5.97033	6.79601	2.50012e-08	3.9501e-07
EOMES	1.34608	7.77404	6.78203	2.61988e-08	4.11273e-07
LCLAT1	1.10084	6.39065	6.76177	2.80379e-08	4.36777e-07
RCBTB2	1.04248	7.48177	6.75838	2.83581e-08	4.41203e-07
RB1	1.05074	6.99415	6.6911	3.55286e-08	5.32212e-07
GLTSCR1L	1.09484	7.31251	6.69106	3.55329e-08	5.32212e-07
BTN3A3	1.30429	8.61662	6.67738	3.72001e-08	5.52733e-07
BANF1	1.01468	8.17864	6.66666	3.85614e-08	5.70186e-07
DYNLL1	1.36498	9.19335	6.63399	4.30249e-08	6.27456e-07
XAF1	1.01055	7.2318	6.62123	4.4906e-08	6.51004e-07
SLAMF6	1.00808	7.41318	6.60867	4.68375e-08	6.76998e-07
ATP2B4	1.29626	7.65065	6.585	5.0707e-08	7.24798e-07
TEP1	1.03592	6.55173	6.57857	5.18133e-08	7.37116e-07
DSERG1	1.20711	7.40634	6.57019	5.32902e-08	7.5421e-07
IL6R	1.08075	7.11451	6.56931	5.34483e-08	7.56009e-07
DNAJC13	1.13189	6.09924	6.54555	5.78823e-08	8.08434e-07
SLC46A3	1.06688	6.98447	6.52792	6.14081e-08	8.4593e-07
SLC40A1	1.25176	7.26039	6.51703	6.3694e-08	8.7265e-07
LRRK2	1.65605	6.89995	6.49162	6.93625e-08	9.38216e-07
FAM198B	1.75027	7.19901	6.47635	7.30119e-08	9.78912e-07
PRF1	1.44639	9.55756	6.4667	7.54143e-08	1.0067e-06
MSRB1	1.3424	8.20108	6.44217	8.18851e-08	1.07488e-06
IPCEF1	1.16566	7.35145	6.44023	8.24195e-08	1.08016e-06
ZC3H4	1.04509	7.02344	6.41907	8.84882e-08	1.14739e-06
LOC401317	1.13684	5.79572	6.40771	9.19258e-08	1.18329e-06
CWC27	1.0433	6.3551	6.34654	1.12881e-07	1.41272e-06
HDHD2	1.69225	7.09736	6.33759	1.16324e-07	1.45142e-06
PHKB	1.07329	6.56165	6.26737	1.47251e-07	1.77209e-06
MYOF	1.06167	5.7305	6.24955	1.5633e-07	1.85193e-06
SAMD3	1.25443	6.75915	6.23659	1.63283e-07	1.91873e-06
TRAT1	1.04819	7.97087	6.2106	1.78168e-07	2.07075e-06
TBCK	1.41003	6.05865	6.18353	1.95119e-07	2.24112e-06
BLNK	1.34314	6.05125	6.1511	2.1756e-07	2.45731e-06
CD1D	1.07403	7.00309	6.09716	2.60735e-07	2.88497e-06
CACNA2D3	1.00729	5.59228	6.02173	3.35824e-07	3.5875e-06
EMG1	1.13837	7.12038	6.00167	3.59196e-07	3.80861e-06
BTN3A2	1.31107	8.83568	5.97248	3.96142e-07	4.13959e-06
AMICA1	1.04265	8.70737	5.93768	4.45164e-07	4.57381e-06
VNN1	1.24899	5.49854	5.92362	4.66642e-07	4.75542e-06
C2orf74	1.06912	5.41963	5.91942	4.73261e-07	4.81375e-06
FAM65B	1.35949	8.75664	5.90886	4.90311e-07	4.96034e-06
TMEM251	1.34686	5.86888	5.89874	5.07236e-07	5.114e-06
STEAP4	1.2932	5.73964	5.75804	8.12483e-07	7.67634e-06
TNFRSF17	1.0768	4.50469	5.68918	1.02283e-06	9.39142e-06
SAMHD1	1.19188	9.48556	5.67776	1.06264e-06	9.70232e-06
RTN1	1.17638	6.30529	5.64171	1.19863e-06	1.07564e-05
FCRL3	1.38252	6.95381	5.60032	1.3762e-06	1.20866e-05
IGSF6	1.05065	6.59339	5.57598	1.49264e-06	1.29741e-05
MEGF9	1.48097	6.8806	5.52976	1.74128e-06	1.48398e-05
WBP1L	1.09333	7.50704	5.50897	1.86616e-06	1.57881e-05
HCK	1.05543	8.97682	5.50284	1.90467e-06	1.60484e-05
CSF1R	1.16897	8.00092	5.44233	2.32955e-06	1.91006e-05
C11orf73	1.00909	6.98447	5.43967	2.35028e-06	1.92572e-05
AF520793	1.22264	7.26613	5.43235	2.40822e-06	1.96796e-05
CLEC12A	1.16321	6.66152	5.18499	5.46627e-06	4.02794e-05
MAD1L1	1.00674	6.77052	5.17567	5.63713e-06	4.13513e-05
LOC102724356	1.06115	7.9029	5.15666	6.00196e-06	4.37649e-05
NEXN	1.09817	5.56707	5.11103	6.97611e-06	5.00323e-05
PWAR6	1.10111	6.18372	5.07232	7.92387e-06	5.58947e-05
TARP	1.08387	7.96477	5.0165	9.51865e-06	6.55735e-05
A2M-AS1	1.21721	7.00449	5.011	9.6919e-06	6.6542e-05
TRGC2	1.12137	8.49237	5.00408	9.91437e-06	6.79358e-05
TRGV9	1.12137	8.49237	5.00408	9.91437e-06	6.79358e-05
FGL2	1.56853	9.62182	5.00335	9.93806e-06	6.80455e-05
MCTP1	1.11191	6.11494	4.89199	1.43073e-05	9.38287e-05
DUSP6	1.20167	8.80428	4.85172	1.63153e-05	0.000105219
VCL	1.04814	7.99819	4.74728	2.29098e-05	0.000142447
CD24	1.10777	6.27885	4.72818	2.43729e-05	0.000150473
CYP1B1	1.43244	7.04023	4.64023	3.23835e-05	0.000193053
MYBL1	1.11068	7.45846	4.56763	4.09012e-05	0.000236617
PROS1	1.21319	5.90658	4.35976	7.93628e-05	0.000423165
AKR1C3	1.01821	5.9441	4.23341	0.000118195	0.000602864
GUCY1B3	1.00105	6.01693	4.21946	0.00012348	0.000626423
HSPA1A	1.63585	7.75519	4.16636	0.000145793	0.000721349
HSPA1B	1.63585	7.75519	4.16636	0.000145793	0.000721349
CXCR2	1.29708	6.5948	3.64039	0.000723963	0.00290226
ELOVL7	1.2545	6.52846	3.6397	0.000725436	0.00290722
IFIT1	1.02112	5.93536	3.63418	0.000737396	0.00294549
LCN2	1.08785	7.47799	3.564	0.000907066	0.00350687
OLFM4	1.15847	3.94972	3.53515	0.000987148	0.00376949

## Sheet: Sheet2
			DEGs between RR-MS and Healthy control
up-regulated							down-regulated
Gene symble	logFC	AveExpr	t	P.Value	adj.P.Val		Gene symble	logFC	AveExpr	t	P.Value	adj.P.Val
DUSP7	1.40954	5.58997	14.9722	6.57435e-20	1.6069e-16		RGPD1	-1.94451	6.71334	-16.4737	1.30506e-21	1.59491e-17
TP53	1.50483	5.81861	13.5917	3.04608e-18	2.64167e-15		RGPD2	-1.94451	6.71334	-16.4737	1.30506e-21	1.59491e-17
CPSF2	1.23509	6.46987	13.4658	4.37256e-18	3.33982e-15		CTD-3222D19.5	-1.55439	6.91993	-16.2932	2.06293e-21	1.68073e-17
MRPL18	1.19902	7.4512	13.3326	6.42273e-18	4.61719e-15		MIR6883	-1.67474	8.0114	-15.8867	5.86275e-21	2.86595e-17
CCR2	2.90635	6.51519	13.1652	1.04476e-17	6.72002e-15		PER1	-1.67474	8.0114	-15.8867	5.86275e-21	2.86595e-17
NME6	1.13795	5.64902	12.9737	1.83036e-17	1.11844e-14		RP11-769O8.3	-2.5109	5.72698	-15.6106	1.20409e-20	4.90506e-17
TNFSF10	2.71303	7.7978	12.9401	2.02081e-17	1.2047e-14		RBM39	-1.01625	9.11343	-15.3936	2.13273e-20	7.44687e-17
CALHM2	1.20288	6.86584	12.9239	2.11922e-17	1.23328e-14		NUPL1	-2.49182	7.27665	-15.1891	3.6744e-20	1.12262e-16
TRIM4	1.266	7.23594	12.2429	1.62441e-16	6.40737e-14		CTNNB1	-1.63956	7.92335	-15.0133	5.88648e-20	1.59864e-16
PSMA5	1.10417	6.80154	12.2089	1.80081e-16	6.98658e-14		GSPT1	-1.39054	7.85079	-14.9358	7.25273e-20	1.61156e-16
GIMAP6	2.42552	7.75311	12.0307	3.10198e-16	1.02457e-13		MAP3K8	-2.5783	7.6889	-14.729	1.27112e-19	2.58905e-16
CYSLTR1	1.39345	6.26342	11.9207	4.3467e-16	1.37977e-13		SKIL	-3.00289	7.41725	-14.6993	1.37833e-19	2.59146e-16
NDUFAF1	1.67421	5.32551	11.8927	4.7376e-16	1.46578e-13		GOLGA4	-2.00522	8.05583	-14.5187	2.26004e-19	3.94571e-16
TNFAIP8L2	1.47898	6.59541	11.772	6.87665e-16	2.02505e-13		CXCL8	-5.36268	9.1127	-14.3789	3.32328e-19	5.41517e-16
COA3	1.48438	6.73027	11.6614	9.69412e-16	2.78757e-13		TAF9B	-1.23066	6.83138	-14.2875	4.28178e-19	6.54096e-16
TICAM2	1.27727	6.02574	11.5788	1.25348e-15	3.48154e-13		SAMD4B	-1.50591	6.9004	-14.1744	5.86613e-19	8.04493e-16
CDK2AP2	1.18622	6.42056	11.3508	2.56175e-15	6.38922e-13		GABARAPL3	-2.75873	8.00807	-14.1709	5.92458e-19	8.04493e-16
COPS5	1.14499	8.16619	11.2713	3.29163e-15	7.88766e-13		CLK1	-1.77855	9.4538	-14.1034	7.15436e-19	9.20352e-16
LOC101928429	1.58492	5.5922	11.1945	4.19752e-15	9.67885e-13		GABARAPL1	-2.67375	8.28799	-13.9839	1.0006e-18	1.22283e-15
TLR10	1.00754	5.67389	11.1447	4.91604e-15	1.09234e-12		G0S2	-4.49045	8.74564	-13.8881	1.31121e-18	1.5097e-15
ORMDL2	1.09605	7.49113	11.077	6.09674e-15	1.3305e-12		PELI1	-2.42906	9.12049	-13.8754	1.35886e-18	1.5097e-15
CHCHD1	1.13584	7.16483	11.0617	6.40141e-15	1.38463e-12		RGPD3	-1.62718	7.41045	-13.7142	2.14728e-18	1.94385e-15
ORAI3	1.06464	6.73127	11.0293	7.09785e-15	1.5218e-12		RGPD4	-1.62718	7.41045	-13.7142	2.14728e-18	1.94385e-15
TRIM34	1.13835	5.94804	10.9221	1e-14	2.03684e-12		RGPD5	-1.62718	7.41045	-13.7142	2.14728e-18	1.94385e-15
TRIM6-TRIM34	1.13835	5.94804	10.9221	1e-14	2.03684e-12		RGPD6	-1.62718	7.41045	-13.7142	2.14728e-18	1.94385e-15
TLR8	2.06209	7.49321	10.866	1.1974e-14	2.36024e-12		RGPD8	-1.62718	7.41045	-13.7142	2.14728e-18	1.94385e-15
PCMT1	1.34979	8.01354	10.8519	1.25273e-14	2.43009e-12		C9orf38	-1.40943	4.80109	-13.5818	3.13429e-18	2.64167e-15
ST8SIA4	1.92627	5.23011	10.8285	1.35056e-14	2.56148e-12		SREK1	-1.29262	6.48074	-13.5693	3.24844e-18	2.64661e-15
METTL7A	1.17683	7.68388	10.8282	1.3519e-14	2.56148e-12		PRO2852	-3.24981	8.11823	-13.4832	4.15936e-18	3.27945e-15
LMO2	1.2705	7.25688	10.766	1.65168e-14	2.96052e-12		CCNL1	-1.69084	9.24818	-13.3404	6.27921e-18	4.61719e-15
NLRC4	1.50215	5.23536	10.7645	1.6594e-14	2.96052e-12		TRAPPC10	-1.11184	7.35937	-13.2343	8.54387e-18	5.80081e-15
RAB10	2.06089	7.97539	10.722	1.90363e-14	3.32347e-12		PAPD7	-1.3646	7.74239	-13.1978	9.50114e-18	6.2764e-15
GIMAP8	2.04221	5.51544	10.6529	2.38036e-14	3.82769e-12		NR4A2	-3.52793	8.57665	-13.0909	1.29817e-17	8.13584e-15
SCD5	1.70843	5.92748	10.6461	2.43347e-14	3.88752e-12		SNRPA1	-1.32259	8.56798	-12.8644	2.52608e-17	1.43587e-14
DYNC1I2	1.45717	6.42261	10.6326	2.54233e-14	4.0012e-12		LONRF1	-1.59525	6.3805	-12.827	2.8221e-17	1.56768e-14
NDUFB3	1.05626	7.52518	10.6312	2.55338e-14	4.0012e-12		FUS	-1.32041	7.67978	-12.8184	2.8948e-17	1.57233e-14
MAT2B	1.20521	8.5906	10.6312	2.55375e-14	4.0012e-12		RP11-138A9.1	-3.61377	8.28764	-12.6518	4.74841e-17	2.51427e-14
IRF2	2.06425	6.14448	10.6164	2.67921e-14	4.09666e-12		ERMN	-1.77669	4.93867	-12.6458	4.83474e-17	2.51427e-14
ATP6V1A	1.10018	8.37981	10.5937	2.88355e-14	4.29755e-12		FAM133B	-1.53429	7.67181	-12.5646	6.16075e-17	3.07308e-14
SAC3D1	1.28287	4.6805	10.5836	2.97983e-14	4.41123e-12		FAM133DP	-1.53429	7.67181	-12.5646	6.16075e-17	3.07308e-14
PPP2CB	1.19664	6.83647	10.5427	3.4036e-14	4.89357e-12		MED26	-1.18851	7.23252	-12.5238	6.96268e-17	3.40363e-14
JKAMP	1.08201	6.58109	10.5265	3.58754e-14	5.12409e-12		ATG16L1	-1.34129	6.60964	-12.4714	8.14695e-17	3.90446e-14
TRIM5	1.27404	4.87783	10.5245	3.61065e-14	5.12409e-12		OSM	-2.3544	7.23435	-12.4369	9.03971e-17	4.16884e-14
RNASE6	1.4785	9.17758	10.5157	3.71619e-14	5.22017e-12		GRASP	-1.23872	7.37839	-12.3509	1.17153e-16	5.29951e-14
P2RY13	2.08537	6.60887	10.4838	4.12286e-14	5.59839e-12		RPS16P5	-2.87515	8.13827	-12.345	1.19251e-16	5.29951e-14
OAS1	2.36671	6.61731	10.4616	4.4332e-14	5.95364e-12		SFPQ	-1.28482	8.83373	-12.3349	1.22924e-16	5.31444e-14
COPB2	1.47357	6.22662	10.4565	4.50727e-14	6.02004e-12		TNIK	-1.13261	6.71877	-12.3322	1.23936e-16	5.31444e-14
GIMAP4	2.38377	8.0349	10.4301	4.91257e-14	6.42102e-12		NAMPT	-2.63406	9.94962	-12.3222	1.27771e-16	5.38445e-14
MRPS18B	1.01267	7.30967	10.3071	7.34768e-14	9.05488e-12		CHD2	-1.49343	7.07069	-12.2962	1.38229e-16	5.72643e-14
PTPN6	1.15559	8.99556	10.2531	8.77566e-14	1.05144e-11		TSPYL2	-1.0609	8.22332	-12.2603	1.54084e-16	6.27685e-14
VPREB3	1.09488	5.76323	10.2217	9.72754e-14	1.14308e-11		AFF4	-1.12801	6.11473	-12.2427	1.62531e-16	6.40737e-14
MNDA	2.4126	10.0798	10.1897	1.08104e-13	1.23328e-11		C8orf60	-1.87504	7.16376	-12.2037	1.82986e-16	6.98833e-14
GIMAP1	1.61152	7.59212	10.1808	1.11324e-13	1.25391e-11		TFRC	-1.30979	7.50494	-12.1376	2.23764e-16	8.41421e-14
C14orf119	1.60858	7.06312	10.1775	1.12527e-13	1.26164e-11		RHOH	-1.6465	9.01982	-12.1043	2.47699e-16	8.89826e-14
MRPL51	1.10004	7.28848	10.1752	1.13405e-13	1.26568e-11		HBEGF	-2.16784	7.54905	-12.1034	2.4839e-16	8.89826e-14
SNAPIN	1.00801	7.93251	10.1566	1.20584e-13	1.32167e-11		BTG3	-1.89761	7.09042	-12.0997	2.51199e-16	8.89826e-14
ZMYM6NB	1.63356	6.92879	10.1478	1.24144e-13	1.33742e-11		SLC26A6	-1.72004	6.32521	-12.0826	2.64673e-16	9.24164e-14
SLC25A11	1.15105	6.46549	10.1238	1.34353e-13	1.42328e-11		TRA2A	-1.55663	7.82817	-12.0617	2.82113e-16	9.71185e-14
VPS35	1.19604	7.33504	10.1183	1.36849e-13	1.44175e-11		SLC25A36	-1.11223	7.82342	-12.0454	2.96505e-16	9.96663e-14
PPIL1	1.51359	5.33725	10.1022	1.44297e-13	1.50723e-11		AP3M2	-1.33225	7.16197	-12.0441	2.9767e-16	9.96663e-14
ATP6V1C1	1.20527	5.56621	10.0906	1.49933e-13	1.55943e-11		SIK1	-1.95557	7.70961	-12.0015	3.3918e-16	1.10536e-13
CISD1	1.12831	5.33768	10.0526	1.70065e-13	1.73197e-11		TBRG1	-1.23949	7.22279	-11.9696	3.7405e-16	1.20296e-13
IDH1	1.89366	6.18444	10.0373	1.78878e-13	1.79186e-11		SPATA13	-1.15757	7.75955	-11.8499	5.40574e-16	1.6312e-13
PROSC	1.22578	6.98603	10.0284	1.84219e-13	1.83035e-11		CXorf65	-1.08869	5.82709	-11.7382	7.63691e-16	2.22216e-13
PSMB8-AS1	1.59986	7.72586	10.0083	1.96971e-13	1.91807e-11		SCML1	-1.82116	6.08636	-11.6001	1.17318e-15	3.29595e-13
RNF5P1	1.03819	7.30642	9.99024	2.09105e-13	2.02816e-11		AK026714	-3.33245	9.09892	-11.5526	1.36037e-15	3.73598e-13
ZNF146	1.30873	7.04956	9.97363	2.20969e-13	2.12635e-11		HAUS3	-1.54607	8.31738	-11.5242	1.4867e-15	4.03755e-13
NUDCD1	1.01171	5.24849	9.93395	2.52121e-13	2.37013e-11		RP11-271C24.3	-2.79733	7.44379	-11.504	1.58382e-15	4.25402e-13
DCP1B	1.20923	5.53478	9.90645	2.76286e-13	2.56497e-11		RP11-373D23.2	-2.93688	6.71743	-11.4584	1.82702e-15	4.78486e-13
CASP1	1.13317	9.76006	9.89398	2.87996e-13	2.63954e-11		ZNF331	-2.54035	8.66414	-11.4561	1.84018e-15	4.78486e-13
LPAR6	1.12967	7.16864	9.89363	2.88339e-13	2.63954e-11		SLC19A2	-1.30651	5.05282	-11.4467	1.89513e-15	4.87588e-13
OSBPL11	1.19236	6.92478	9.89013	2.91712e-13	2.65057e-11		C1orf52	-1.00612	7.45263	-11.4258	2.02378e-15	5.15264e-13
BANF1	1.31699	8.39243	9.86072	3.21766e-13	2.8703e-11		EML4	-1.29001	7.68904	-11.3422	2.63214e-15	6.49845e-13
MYC	1.14982	8.25208	9.84634	3.37577e-13	2.96801e-11		PTBP2	-1.67529	6.14679	-11.2764	3.23951e-15	7.83962e-13
AHSA1	1.09058	7.60246	9.78829	4.09799e-13	3.49001e-11		CEP95	-1.22002	6.53982	-11.1713	4.5176e-15	1.03195e-12
TRIM14	1.05697	6.01141	9.75854	4.52689e-13	3.77201e-11		JMJD6	-1.50462	7.30536	-11.1644	4.61762e-15	1.04504e-12
PPID	1.06386	7.46022	9.75112	4.64068e-13	3.83201e-11		U2AF1	-1.10334	8.57529	-11.1576	4.71875e-15	1.05812e-12
SLC46A2	1.3464	5.3956	9.72462	5.07146e-13	4.09098e-11		SRSF4	-1.37853	8.02717	-11.1297	5.15622e-15	1.13539e-12
YWHAB	1.061	10.2266	9.7169	5.20446e-13	4.17073e-11		DBF4	-1.61218	7.60966	-11.0235	7.2321e-15	1.52385e-12
KIAA0930	1.16185	7.15642	9.7041	5.43257e-13	4.28331e-11		RUNX1-IT1	-1.89819	6.95807	-10.9533	9.04928e-15	1.89045e-12
GIMAP1-GIMAP5	1.28297	7.54493	9.64425	6.64136e-13	5.02564e-11		ZBTB21	-1.62733	7.85726	-10.9284	9.8018e-15	2.0303e-12
GIMAP5	1.28297	7.54493	9.64425	6.64136e-13	5.02564e-11		MGC12488	-1.48798	5.07688	-10.8973	1.08297e-14	2.16966e-12
GAPT	2.32358	6.46742	9.6332	6.89276e-13	5.16788e-11		ZFAND6	-1.28763	8.96542	-10.8869	1.11961e-14	2.22483e-12
PDHB	1.25204	7.69701	9.62199	7.15752e-13	5.33953e-11		SCAF4	-1.50659	6.85415	-10.8304	1.34251e-14	2.56148e-12
SMIM14	1.57422	6.43236	9.61952	7.21729e-13	5.33953e-11		FLT1	-1.16253	5.73056	-10.7831	1.56326e-14	2.86675e-12
CEBPA	1.02524	7.80668	9.61714	7.2752e-13	5.35604e-11		CCDC84	-1.26986	7.82204	-10.7791	1.58345e-14	2.86687e-12
TIMMDC1	1.42577	7.15744	9.61038	7.44251e-13	5.41512e-11		IKZF5	-1.01799	7.31667	-10.7432	1.77764e-14	3.14848e-12
TFCP2	1.12841	6.51732	9.61032	7.44408e-13	5.41512e-11		HBB	-4.63555	11.287	-10.7118	1.96731e-14	3.41027e-12
GNB4	1.13273	7.01287	9.60636	7.54391e-13	5.4326e-11		HBA1	-4.50327	11.6029	-10.6895	2.1147e-14	3.58773e-12
RNF14	1.1358	5.14732	9.59094	7.9457e-13	5.64981e-11		HBA2	-4.50327	11.6029	-10.6895	2.1147e-14	3.58773e-12
GLB1	1.234	7.84076	9.58986	7.97474e-13	5.64981e-11		RLF	-1.32177	7.60427	-10.6852	2.14376e-14	3.58889e-12
TMPPE	1.234	7.84076	9.58986	7.97474e-13	5.64981e-11		CD83	-2.20608	9.37883	-10.6668	2.27535e-14	3.78225e-12
KCNE3	1.21253	6.98977	9.57385	8.41647e-13	5.89442e-11		FNIP1	-1.13638	5.58286	-10.6648	2.29021e-14	3.78225e-12
DCK	1.54431	8.0995	9.5478	9.18866e-13	6.34692e-11		ADNP2	-1.01712	7.91511	-10.6558	2.35815e-14	3.82324e-12
ECHDC1	1.55037	7.17182	9.53572	9.57071e-13	6.49798e-11		AREG	-2.31519	5.9155	-10.6264	2.59341e-14	4.03613e-12
NAGK	1.41345	8.6003	9.53458	9.60753e-13	6.50491e-11		GZF1	-1.83521	6.62436	-10.6246	2.60907e-14	4.03613e-12
TCEAL8	1.04448	6.32082	9.52868	9.80054e-13	6.59903e-11		EBLN2	-1.4189	6.76034	-10.6063	2.76798e-14	4.20218e-12
MEF2C	1.52602	7.19107	9.51161	1.03816e-12	6.9141e-11		ASXL1	-1.01863	7.25167	-10.5989	2.83579e-14	4.25229e-12
MEFV	1.54853	5.67188	9.5099	1.04417e-12	6.93464e-11		USPL1	-1.25454	6.99591	-10.5453	3.37465e-14	4.89357e-12
HVCN1	1.09531	8.19717	9.50912	1.04692e-12	6.93464e-11		RP11-182L21.5	-2.48548	6.46462	-10.5436	3.39316e-14	4.89357e-12
MKKS	1.32913	5.96741	9.50454	1.06324e-12	7.02373e-11		MGEA5	-1.22292	8.37696	-10.5232	3.62682e-14	5.12409e-12
SKA2	1.28043	6.19071	9.49952	1.08143e-12	7.0864e-11		SYTL3	-1.13651	6.67518	-10.5019	3.8868e-14	5.39072e-12
C7orf55	1.01831	6.0024	9.4942	1.10101e-12	7.17626e-11		NPIPB11	-1.66251	6.91574	-10.5016	3.89061e-14	5.39072e-12
MS4A6A	1.29045	9.0523	9.48714	1.12759e-12	7.30094e-11		GOLGA8A	-1.18278	7.64652	-10.5006	3.90376e-14	5.39072e-12
ABRACL	1.06085	9.18943	9.47215	1.18619e-12	7.60967e-11		BD495725	-1.87496	6.47789	-10.4915	4.02062e-14	5.49006e-12
PRDX3	1.25252	7.44482	9.46176	1.22859e-12	7.8201e-11		RRN3P2	-1.07143	6.8798	-10.4743	4.25253e-14	5.74257e-12
CX3CR1	2.93121	7.9204	9.45974	1.23701e-12	7.83287e-11		HIF1A	-1.17341	10.9919	-10.4453	4.67454e-14	6.17845e-12
IGKV2-28	1.04703	6.46747	9.45723	1.24753e-12	7.85881e-11		TP53INP2	-1.66035	7.14338	-10.4448	4.68217e-14	6.17845e-12
IGKV2D-28	1.04703	6.46747	9.45723	1.24753e-12	7.85881e-11		ZMYM2	-1.17834	6.25799	-10.4157	5.14981e-14	6.6953e-12
GIN1	1.2813	4.73415	9.44034	1.3209e-12	8.21514e-11		IDI1	-1.03191	8.38598	-10.4077	5.28644e-14	6.83657e-12
PTGER2	1.44308	7.68374	9.42916	1.37184e-12	8.48901e-11		LOC101060275	-1.84066	7.78483	-10.399	5.43872e-14	6.99649e-12
MRPS28	1.21241	6.44558	9.41367	1.44569e-12	8.85604e-11		IFRD1	-1.53285	7.42802	-10.387	5.65611e-14	7.23429e-12
ARHGAP30	1.08273	8.74702	9.40986	1.46444e-12	8.94665e-11		ZNF451	-1.2526	7.37007	-10.3855	5.68277e-14	7.23429e-12
CD1D	1.43525	7.24743	9.38507	1.59278e-12	9.56531e-11		RSRC2	-1.03968	8.87097	-10.3808	5.77153e-14	7.30921e-12
PRKAR1A	1.14517	8.66429	9.37616	1.64161e-12	9.81033e-11		MIR612	-2.556	9.25709	-10.3702	5.97593e-14	7.49045e-12
METTL2B	1.05079	4.96036	9.36347	1.71382e-12	1.01181e-10		NEAT1	-2.556	9.25709	-10.3702	5.97593e-14	7.49045e-12
P2RY14	1.45035	5.38713	9.35333	1.77378e-12	1.03719e-10		RORA	-1.04016	7.2228	-10.3593	6.19291e-14	7.72281e-12
C14orf142	1.25133	5.503	9.35183	1.78286e-12	1.04002e-10		LOC101929910	-1.99112	7.38753	-10.3061	7.37223e-14	9.05488e-12
MTIF3	1.16429	5.87524	9.31764	2.00232e-12	1.14615e-10		CHD1	-1.58264	9.02308	-10.2844	7.9158e-14	9.67389e-12
FUNDC1	1.33864	5.67137	9.31039	2.0522e-12	1.17053e-10		YES1	-1.32299	5.31902	-10.2793	8.0514e-14	9.79066e-12
RMI1	1.05127	4.99348	9.29956	2.12919e-12	1.20046e-10		RP11-469M7.1	-1.58966	7.71493	-10.2292	9.49225e-14	1.12082e-11
RNF20	1.49894	7.59193	9.28687	2.22302e-12	1.24052e-10		PLK3	-1.31841	6.78867	-10.1998	1.04581e-13	1.21145e-11
ARMC10	1.16032	6.67889	9.27387	2.32348e-12	1.28195e-10		LOC613037	-1.9101	7.21316	-10.1872	1.08988e-13	1.23328e-11
HDHD1	1.15998	6.92633	9.23913	2.61511e-12	1.42358e-10		NPIPB4	-1.9101	7.21316	-10.1872	1.08988e-13	1.23328e-11
ARL11	1.12419	4.85689	9.23183	2.68096e-12	1.44973e-10		NPIPB5	-1.9101	7.21316	-10.1872	1.08988e-13	1.23328e-11
TXNDC9	1.14829	6.8321	9.23083	2.69015e-12	1.4515e-10		SNORA28	-2.27338	6.85479	-10.1699	1.15395e-13	1.28204e-11
CSK	1.00587	8.70387	9.22612	2.7336e-12	1.46845e-10		AX747826	-2.03964	6.78153	-10.166	1.16891e-13	1.29279e-11
NBR1	1.09724	6.72684	9.21941	2.79684e-12	1.49258e-10		VEGFA	-2.13603	7.44914	-10.1546	1.21387e-13	1.32453e-11
PARP1	1.09344	7.137	9.21836	2.80689e-12	1.49469e-10		ZNF791	-1.44518	8.18026	-10.1467	1.24558e-13	1.33742e-11
METTL2A	1.21357	5.26758	9.21097	2.87848e-12	1.52366e-10		PRC1	-1.06073	5.01564	-10.1467	1.24581e-13	1.33742e-11
SMCO4	1.74257	7.35135	9.20385	2.94923e-12	1.55356e-10		NPIPB3	-1.74304	7.00462	-10.0816	1.54461e-13	1.59297e-11
PVRIG	1.00869	7.23395	9.20159	2.97199e-12	1.55446e-10		PFKFB3	-2.2503	8.23358	-10.0786	1.56033e-13	1.60242e-11
CORO1A	1.13463	10.4907	9.19184	3.07245e-12	1.59441e-10		RBM38	-1.3076	8.13766	-10.0456	1.74013e-13	1.76482e-11
FES	1.0479	6.04079	9.14699	3.58067e-12	1.84057e-10		ARHGEF7	-1.01687	6.30793	-10.0391	1.77832e-13	1.78871e-11
COMMD8	1.35925	8.63741	9.14601	3.59272e-12	1.84057e-10		LOC727820	-2.66572	8.69752	-10.0295	1.83571e-13	1.83035e-11
NIF3L1	1.18128	6.46915	9.14016	3.66517e-12	1.86633e-10		LOC145474	-1.61108	4.62779	-10.0224	1.87915e-13	1.85321e-11
CCT5	1.03731	7.53822	9.13669	3.70892e-12	1.88078e-10		ETV3	-1.22723	7.30609	-10.0223	1.88035e-13	1.85321e-11
DDX60	2.12321	6.7585	9.11546	3.98799e-12	1.99743e-10		NECAP1	-1.01517	7.35812	-10.0123	1.94328e-13	1.90753e-11
ZDHHC16	1.05247	6.07565	9.10972	4.06711e-12	2.02874e-10		FOSL2	-1.27885	7.57264	-10.0111	1.9512e-13	1.90765e-11
FUCA1	1.30678	6.55097	9.10687	4.10686e-12	2.0361e-10		LINC-PINT	-1.48784	7.30226	-9.97457	2.20274e-13	2.12635e-11
HSD17B4	1.62212	6.27199	9.10422	4.14424e-12	2.04221e-10		SLC2A3	-1.66607	8.87845	-9.96059	2.30753e-13	2.21179e-11
CARD16	1.21183	8.94074	9.0952	4.27408e-12	2.08102e-10		SMURF1	-1.08337	5.36456	-9.95733	2.33264e-13	2.22712e-11
ARPC5	1.14288	9.23962	9.08763	4.3862e-12	2.12713e-10		RAB12	-1.1536	7.11016	-9.94977	2.39201e-13	2.25736e-11
SPTSSA	1.18329	6.15147	9.08673	4.39974e-12	2.12947e-10		PIGA	-1.43703	6.41659	-9.9304	2.55119e-13	2.38912e-11
CECR1	1.29977	9.92674	9.0797	4.50696e-12	2.16423e-10		LOC100190986	-2.58954	7.49132	-9.87978	3.01952e-13	2.73345e-11
KCTD12	1.53128	9.3476	9.052	4.9552e-12	2.33362e-10		IRS2	-1.11972	9.19102	-9.86955	3.12423e-13	2.8178e-11
GRN	1.18626	9.41882	9.03892	5.18241e-12	2.41305e-10		C12orf79	-1.41983	4.64582	-9.86372	3.18561e-13	2.85211e-11
C1orf162	1.01901	9.63363	9.03384	5.27346e-12	2.45045e-10		REV3L	-1.10548	6.97541	-9.85193	3.31336e-13	2.94491e-11
SCOC	1.23329	6.72068	9.03052	5.33371e-12	2.46906e-10		CCNT1	-1.00909	7.70843	-9.84826	3.35421e-13	2.96801e-11
DDX58	1.15998	6.15273	9.02253	5.48185e-12	2.51856e-10		PTS	-1.34287	7.06355	-9.82742	3.59587e-13	3.13893e-11
MRPS18C	1.05468	6.13979	9.01204	5.68264e-12	2.58169e-10		AK128734	-1.39793	5.54314	-9.82447	3.63135e-13	3.15863e-11
TLR7	1.27967	5.36809	9.01066	5.70951e-12	2.58909e-10		SBDS	-1.34729	9.00729	-9.81452	3.75416e-13	3.24238e-11
PRDX1	1.06681	8.52111	8.99151	6.09721e-12	2.74453e-10		SBDSP1	-1.34729	9.00729	-9.81452	3.75416e-13	3.24238e-11
LRRC25	1.12728	7.66312	8.97434	6.46741e-12	2.88988e-10		RGS1	-2.55956	8.48986	-9.74297	4.76911e-13	3.91163e-11
LOC100505812	1.42779	6.56519	8.93029	7.52408e-12	3.24374e-10		CDC42-IT1	-1.75614	6.6896	-9.73229	4.94291e-13	4.01378e-11
LACTB2	1.35165	5.15469	8.92876	7.56379e-12	3.25483e-10		JMJD1C	-1.43813	7.9311	-9.72035	5.14464e-13	4.13636e-11
MGC70870	1.0537	3.8143	8.86561	9.39959e-12	3.89398e-10		TNFAIP3	-1.71025	11.0329	-9.71181	5.29407e-13	4.20122e-11
S100A11	1.07775	9.56725	8.86323	9.47684e-12	3.91934e-10		MAP3K2	-1.18519	8.13046	-9.70688	5.38227e-13	4.25739e-11
LRIF1	1.566	5.05434	8.85019	9.91229e-12	4.05823e-10		SLC25A37	-1.7954	7.32914	-9.68988	5.69807e-13	4.47821e-11
NDUFA8	1.2168	7.09305	8.81395	1.12314e-11	4.48557e-10		CASS4	-1.28058	4.99027	-9.687	5.75341e-13	4.50721e-11
SUCLA2	1.4188	6.05715	8.77706	1.27561e-11	4.98059e-10		LOC102725188	-2.7571	9.3452	-9.66994	6.09239e-13	4.74236e-11
MRPL15	1.04438	6.65874	8.77527	1.28356e-11	4.99737e-10		NKTR	-1.8864	7.5437	-9.66717	6.14935e-13	4.75641e-11
CETN3	1.81557	5.30764	8.77368	1.29062e-11	5.01515e-10		SLC2A14	-1.69961	8.68284	-9.65972	6.30509e-13	4.8462e-11
PCYOX1	1.05145	5.67638	8.7492	1.40448e-11	5.38061e-10		LOC100505915	-1.12466	6.29647	-9.65423	6.4225e-13	4.92096e-11
FAM198B	2.00793	7.45238	8.68768	1.73749e-11	6.47374e-10		AY940074	-1.96866	6.83613	-9.64224	6.68637e-13	5.04408e-11
MPEG1	1.49053	10.3976	8.65008	1.97913e-11	7.26333e-10		YPEL5	-1.17802	10.7175	-9.61993	7.20732e-13	5.33953e-11
BRI3BP	1.28427	6.51401	8.64853	1.9898e-11	7.29155e-10		DUSP2	-1.35947	9.01966	-9.61896	7.23093e-13	5.33953e-11
SLC25A40	1.00642	6.28114	8.64355	2.02445e-11	7.39634e-10		RNF125	-1.19505	8.91694	-9.60584	7.55701e-13	5.4326e-11
CTSC	1.03088	7.79617	8.63615	2.077e-11	7.56687e-10		CDK17	-1.02036	7.88328	-9.59355	7.87633e-13	5.64555e-11
MRPS31	1.43257	6.25243	8.63611	2.07731e-11	7.56687e-10		SRSF11	-1.24122	8.85294	-9.58294	8.16256e-13	5.74955e-11
IFI16	1.14084	8.83439	8.61136	2.26347e-11	8.10009e-10		ZBTB11	-1.07999	7.44645	-9.57647	8.34255e-13	5.85944e-11
DKFZp667J0810	1.407	6.73913	8.60808	2.28931e-11	8.16866e-10		NXT1	-1.09066	8.1142	-9.54439	9.29489e-13	6.38162e-11
IGLV1-36	1.407	6.73913	8.60808	2.28931e-11	8.16866e-10		LOC101927451	-1.14535	6.11237	-9.54011	9.42997e-13	6.43819e-11
OIP5-AS1	1.23705	7.28879	8.59228	2.41837e-11	8.59025e-10		ARNTL	-1.04268	7.58759	-9.51725	1.01859e-12	6.80231e-11
SLC35A5	1.60088	6.21244	8.59192	2.42138e-11	8.59025e-10		LOC100130429	-1.15521	5.4332	-9.49864	1.08466e-12	7.08857e-11
ICAM2	1.19712	8.72643	8.5877	2.45712e-11	8.67875e-10		LINC00936	-2.0389	8.90671	-9.48675	1.1291e-12	7.30094e-11
C6orf211	1.57812	6.6042	8.57832	2.53846e-11	8.9145e-10		RICTOR	-1.2951	8.00422	-9.46604	1.21093e-12	7.72779e-11
MARCH1	1.47437	7.07379	8.56907	2.62126e-11	9.1658e-10		LOC102725125	-1.33378	7.4094	-9.44087	1.31854e-12	8.21514e-11
GBE1	1.03643	6.31514	8.56751	2.63547e-11	9.19342e-10		SPAG9	-1.13702	6.74969	-9.44057	1.31987e-12	8.21514e-11
ACADM	1.94677	6.96589	8.56738	2.63668e-11	9.19342e-10		ITPKB	-1.2674	7.36943	-9.42206	1.40521e-12	8.67325e-11
CSF1R	1.51257	8.24518	8.56675	2.6425e-11	9.20057e-10		KLHL24	-1.245	7.54539	-9.41637	1.43252e-12	8.79741e-11
SRBD1	1.1111	6.07293	8.55209	2.78048e-11	9.58541e-10		SLC22A3	-1.5896	7.16114	-9.39939	1.51735e-12	9.14176e-11
PYCARD	1.06887	8.89468	8.54993	2.80145e-11	9.6441e-10		PDE4B	-1.41082	8.23099	-9.3724	1.66269e-12	9.889e-11
RECK	1.00633	6.51578	8.52802	3.02309e-11	1.02626e-09		SLC7A5	-2.11258	7.55147	-9.36699	1.69348e-12	1.0039e-10
NMI	1.00052	8.74437	8.52616	3.04273e-11	1.02864e-09		KRR1	-1.02016	6.78169	-9.3665	1.6963e-12	1.0039e-10
DPYD	1.33504	7.57294	8.5005	3.32668e-11	1.10627e-09		PAPD4	-1.28867	7.95934	-9.32168	1.97502e-12	1.13585e-10
GALNT7	1.31252	6.25322	8.46942	3.70663e-11	1.21771e-09		GADD45A	-1.16721	7.90496	-9.30145	2.11553e-12	1.19971e-10
HDAC1	1.02273	8.98126	8.45516	3.89532e-11	1.26783e-09		ATXN7	-1.27475	8.72431	-9.29923	2.13158e-12	1.20046e-10
COLCA1	1.33767	9.54405	8.45271	3.92867e-11	1.27522e-09		AK057657	-1.0543	9.83556	-9.29802	2.14037e-12	1.20264e-10
POT1	1.03591	6.02405	8.42473	4.331e-11	1.38912e-09		RP11-403P17.4	-1.91782	9.47212	-9.2627	2.41354e-12	1.32864e-10
TMEM69	1.32024	7.00552	8.42437	4.33637e-11	1.38912e-09		EREG	-2.32398	6.36635	-9.24396	2.57245e-12	1.40655e-10
ATF1	1.25089	6.70093	8.4219	4.37395e-11	1.39749e-09		AP1G1	-1.03961	7.04059	-9.24332	2.57808e-12	1.40655e-10
TDRD7	1.03536	6.26147	8.42086	4.38978e-11	1.40072e-09		LOC100506076	-1.3285	5.71236	-9.23409	2.66041e-12	1.44181e-10
DTX3L	1.21072	8.59548	8.41661	4.45532e-11	1.41609e-09		LOC100506123	-1.3285	5.71236	-9.23409	2.66041e-12	1.44181e-10
OPHN1	1.42412	9.83352	8.39372	4.8255e-11	1.51525e-09		DDIT4	-1.2316	9.88657	-9.22149	2.77712e-12	1.48531e-10
HIATL1	1.09992	6.79295	8.37279	5.19112e-11	1.61017e-09		CLK4	-1.00194	6.78722	-9.21391	2.84977e-12	1.51422e-10
HAUS1	1.04624	6.9018	8.32719	6.08691e-11	1.83222e-09		NDEL1	-1.10183	7.17013	-9.21081	2.88001e-12	1.52366e-10
C21orf59	1.0366	5.97654	8.32645	6.1026e-11	1.83468e-09		ID2B	-1.70785	7.2948	-9.20193	2.96859e-12	1.55446e-10
LRRN3	2.10415	6.70633	8.3187	6.27017e-11	1.87583e-09		PGF	-1.6714	8.60384	-9.14545	3.59951e-12	1.84057e-10
CBX1	1.28576	7.45933	8.30799	6.50932e-11	1.92909e-09		PMAIP1	-1.4423	8.877	-9.13707	3.70409e-12	1.88078e-10
SIRPB2	1.08591	6.4424	8.30678	6.53694e-11	1.93034e-09		RANBP2	-1.37036	7.99066	-9.13411	3.74181e-12	1.88961e-10
PRDX4	1.20502	6.47247	8.30435	6.59264e-11	1.94007e-09		BTAF1	-1.13637	7.23722	-9.11849	3.94688e-12	1.98089e-10
UGDH	1.21856	6.24288	8.30009	6.69163e-11	1.96347e-09		SLC20A1	-1.21211	8.51897	-9.10848	4.08434e-12	2.03318e-10
C4orf27	1.00302	6.29504	8.29149	6.89592e-11	2.01856e-09		CCL3	-2.61272	8.27222	-9.09557	4.26875e-12	2.08102e-10
RB1	1.1898	7.13943	8.28204	7.12762e-11	2.07656e-09		CCL3L1	-2.61272	8.27222	-9.09557	4.26875e-12	2.08102e-10
EAF2	1.25933	5.78722	8.24186	8.2035e-11	2.34789e-09		CCL3L3	-2.61272	8.27222	-9.09557	4.26875e-12	2.08102e-10
IGLV1-50	1.02342	6.37553	8.23079	8.52751e-11	2.41517e-09		GOLGA8B	-1.00837	7.36055	-9.08395	4.44189e-12	2.14139e-10
RPA2	1.14149	7.64422	8.21871	8.89593e-11	2.50789e-09		LOC101930583	-1.00837	7.36055	-9.08395	4.44189e-12	2.14139e-10
CREBL2	1.07419	7.94774	8.21534	9.00146e-11	2.52599e-09		MIR6732	-1.56935	7.4817	-9.07067	4.64834e-12	2.21471e-10
CTBP2	1.02567	7.93091	8.21191	9.11056e-11	2.5467e-09		ZC3H12A	-1.56935	7.4817	-9.07067	4.64834e-12	2.21471e-10
LILRA1	1.23487	6.70258	8.20804	9.23473e-11	2.56203e-09		DOCK4	-2.04845	5.0635	-9.06954	4.66638e-12	2.21898e-10
LBH	1.23038	7.67939	8.18297	1.00828e-10	2.75048e-09		LOC729966	-1.35771	8.49019	-9.06104	4.80425e-12	2.27129e-10
MSRB1	1.50844	8.3816	8.17961	1.0202e-10	2.77681e-09		PDE4C	-1.35771	8.49019	-9.06104	4.80425e-12	2.27129e-10
TCTN2	1.12782	6.41596	8.15986	1.09336e-10	2.93993e-09		CSRNP1	-1.69018	8.09515	-9.05719	4.86797e-12	2.29697e-10
MRPL13	1.09007	6.46868	8.14988	1.1323e-10	3.01477e-09		ZBTB43	-1.47569	7.055	-9.03888	5.1831e-12	2.41305e-10
RPAP3	1.07498	5.90826	8.13258	1.20316e-10	3.16892e-09		TSC22D2	-1.00449	6.44413	-9.01863	5.55558e-12	2.54765e-10
CASP8AP2	1.26798	5.5024	8.1266	1.22867e-10	3.22568e-09		EIF2AK3	-1.17978	7.31095	-9.0135	5.65413e-12	2.57352e-10
GOLPH3L	1.22204	6.0458	8.11844	1.26436e-10	3.30854e-09		LINC01002	-1.29535	8.30797	-8.95766	6.84866e-12	3.01613e-10
COMMD10	1.06675	6.607	8.11799	1.26637e-10	3.30854e-09		LOC100132062	-1.29535	8.30797	-8.95766	6.84866e-12	3.01613e-10
M6PR	1.09355	8.11088	8.11694	1.27106e-10	3.30854e-09		LOC100133182	-1.29535	8.30797	-8.95766	6.84866e-12	3.01613e-10
PCTP	1.03967	7.00376	8.11655	1.27279e-10	3.30952e-09		LOC100133331	-1.29535	8.30797	-8.95766	6.84866e-12	3.01613e-10
ATG4C	1.21451	4.90807	8.11498	1.27982e-10	3.32426e-09		LOC729737	-1.29535	8.30797	-8.95766	6.84866e-12	3.01613e-10
C17orf62	1.51809	6.5463	8.11082	1.29864e-10	3.366e-09		USP34	-1.1643	8.1281	-8.95031	7.02379e-12	3.07112e-10
BLNK	1.58527	6.26511	8.1105	1.30012e-10	3.36626e-09		MAFF	-2.19413	8.18884	-8.93026	7.52475e-12	3.24374e-10
SELPLG	1.04527	8.5686	8.08702	1.41187e-10	3.61728e-09		ZFP36	-1.20164	10.9305	-8.92782	7.5883e-12	3.25662e-10
OPN3	1.11101	6.57712	8.06227	1.54013e-10	3.85696e-09		CLC	-3.04056	7.5569	-8.92757	7.59459e-12	3.25662e-10
RCBTB2	1.1442	7.61004	8.03547	1.69226e-10	4.1612e-09		LINC01001	-1.15226	7.49157	-8.90857	8.10749e-12	3.45835e-10
OAS2	1.46396	6.63974	8.03008	1.72462e-10	4.22376e-09		LOC101929819	-1.15226	7.49157	-8.90857	8.10749e-12	3.45835e-10
GIMAP7	1.57824	8.11965	8.02426	1.76031e-10	4.29825e-09		PHACTR1	-1.95674	6.8188	-8.90268	8.27346e-12	3.51687e-10
TCL1A	1.79504	6.76413	8.02233	1.7723e-10	4.31889e-09		JUN	-2.25501	8.48151	-8.89161	8.59465e-12	3.63444e-10
UCP2	1.2301	9.598	8.02205	1.77407e-10	4.31891e-09		SMG1P1	-1.1367	6.48117	-8.88344	8.83984e-12	3.71637e-10
FLI1	1.06974	7.91065	8.01605	1.81185e-10	4.39775e-09		LOC101060521	-1.01235	7.01293	-8.88028	8.93645e-12	3.74015e-10
LINC00998	1.13732	5.74706	8.01476	1.82014e-10	4.41348e-09		MIAT	-1.16198	6.92112	-8.8779	9.00999e-12	3.75806e-10
HIBCH	1.16308	5.47571	7.986	2.01397e-10	4.8213e-09		FAM160B1	-1.0985	6.67682	-8.84663	1.00347e-11	4.08781e-10
STX7	1.01852	6.10855	7.98132	2.04744e-10	4.87279e-09		SMAD7	-1.96584	7.48314	-8.8371	1.03699e-11	4.19637e-10
C7orf60	1.06042	6.22356	7.96848	2.14205e-10	5.05856e-09		LOC101927166	-1.20128	8.34236	-8.83201	1.05532e-11	4.25647e-10
ETNK1	1.20045	6.00924	7.93007	2.4524e-10	5.70328e-09		JOSD1	-1.14329	9.25925	-8.82935	1.06507e-11	4.28871e-10
LINC00324	1.16714	6.19338	7.92655	2.48297e-10	5.76341e-09		CCDC152	-1.50509	8.64585	-8.80862	1.144e-11	4.55401e-10
TLR5	1.20169	6.43488	7.91949	2.54553e-10	5.89183e-09		AF007147	-1.69793	7.42283	-8.80373	1.16347e-11	4.61647e-10
SLC27A3	1.18131	6.95964	7.88119	2.91357e-10	6.61221e-09		C9orf64	-1.42233	8.83637	-8.77888	1.26762e-11	4.95731e-10
RACGAP1	1.11521	4.49194	7.87633	2.96396e-10	6.70031e-09		LOC101930306	-1.1094	6.58713	-8.75619	1.371e-11	5.26885e-10
METTL18	1.18765	5.92085	7.86046	3.13467e-10	7.00984e-09		LOC100127972	-1.82583	6.66257	-8.73183	1.49138e-11	5.67793e-10
COQ5	1.14885	6.15525	7.82852	3.50868e-10	7.70522e-09		LINC01000	-1.12817	7.7312	-8.6986	1.67306e-11	6.28156e-10
DENND2D	1.15913	7.02737	7.76045	4.46231e-10	9.53389e-09		REL	-1.15652	8.69921	-8.6962	1.68701e-11	6.3242e-10
GPR171	1.23282	7.07049	7.74588	4.69813e-10	9.91815e-09		DKFZP586I1420	-1.0493	8.71651	-8.6784	1.79423e-11	6.66482e-10
ST6GAL1	1.14656	7.11863	7.74378	4.73314e-10	9.97653e-09		HAUS2	-1.16376	8.0517	-8.67411	1.82104e-11	6.75414e-10
IGHV3-23	1.04474	6.53203	7.72906	4.98603e-10	1.04429e-08		FBXW12	-1.45129	8.26021	-8.67065	1.84303e-11	6.82536e-10
MPLKIP	1.13335	7.40426	7.71064	5.32182e-10	1.10609e-08		WDFY2	-1.01275	6.98446	-8.64784	1.99454e-11	7.29799e-10
FCRLA	1.05365	6.18378	7.66445	6.26678e-10	1.27866e-08		FAM161B	-1.27156	8.41	-8.63328	2.09776e-11	7.61866e-10
ZNF528	1.02374	4.46537	7.65113	6.56931e-10	1.3259e-08		LOC100289333	-1.40479	6.79343	-8.63018	2.12042e-11	7.66601e-10
IGKV1-37	1.01983	6.82382	7.64904	6.61826e-10	1.33139e-08		B4GALT1	-1.03131	6.4151	-8.57891	2.53323e-11	8.90897e-10
IGKV1D-37	1.01983	6.82382	7.64904	6.61826e-10	1.33139e-08		UACA	-1.23584	7.07072	-8.55776	2.72623e-11	9.4293e-10
SAMHD1	1.40354	9.67393	7.63956	6.84419e-10	1.37007e-08		ZNF160	-1.66336	7.86709	-8.55763	2.72748e-11	9.4293e-10
FPGT	1.0211	4.66553	7.63322	6.99949e-10	1.38865e-08		UBXN2A	-1.12524	9.02207	-8.54788	2.82147e-11	9.69936e-10
ATP6V1B2	1.02581	8.46147	7.63172	7.03686e-10	1.39493e-08		PLAUR	-1.73191	8.66614	-8.54544	2.8455e-11	9.7682e-10
HDHD2	1.78044	7.27192	7.61944	7.34975e-10	1.44523e-08		THAP9-AS1	-1.28078	8.09728	-8.52657	3.03835e-11	1.02858e-09
CD14	1.32506	10.1329	7.61751	7.40004e-10	1.45278e-08		BRE-AS1	-1.80703	5.33977	-8.52538	3.05091e-11	1.02998e-09
C2orf74	1.32674	5.61825	7.61655	7.42525e-10	1.45656e-08		FAM208B	-1.0277	6.5038	-8.51423	3.17152e-11	1.06417e-09
ARFIP1	1.41452	5.61764	7.61534	7.45705e-10	1.46163e-08		LOC284454	-1.56033	7.61417	-8.51322	3.18268e-11	1.06417e-09
TAF4	1.02204	6.00223	7.58922	8.18043e-10	1.58436e-08		MIR23A	-1.56033	7.61417	-8.51322	3.18268e-11	1.06417e-09
EEA1	1.24069	5.04892	7.55909	9.10239e-10	1.73271e-08		MIR24-2	-1.56033	7.61417	-8.51322	3.18268e-11	1.06417e-09
CYFIP1	1.23683	7.8904	7.53975	9.74873e-10	1.82031e-08		ARID2	-1.19671	6.95067	-8.49285	3.41641e-11	1.13302e-09
LRRC75A-AS1	1.08962	7.52112	7.51799	1.05308e-09	1.94553e-08		ATP8B1	-2.22764	7.9439	-8.46313	3.78866e-11	1.23966e-09
SNORD49A	1.08962	7.52112	7.51799	1.05308e-09	1.94553e-08		RIT1	-1.15462	8.49125	-8.42672	4.30099e-11	1.38322e-09
SNORD49B	1.08962	7.52112	7.51799	1.05308e-09	1.94553e-08		SYAP1	-1.21538	8.37618	-8.42323	4.35363e-11	1.39282e-09
SNORD65	1.08962	7.52112	7.51799	1.05308e-09	1.94553e-08		U50535	-1.87032	8.6351	-8.40994	4.56017e-11	1.44378e-09
C11orf73	1.28376	7.18573	7.51241	1.07414e-09	1.97548e-08		SGK1	-1.76923	9.7401	-8.38384	4.9947e-11	1.55715e-09
SGK223	1.39014	6.25977	7.46438	1.27378e-09	2.28821e-08		C5orf28	-1.45624	6.43865	-8.38012	5.05993e-11	1.57347e-09
MITD1	1.27718	7.25274	7.45512	1.31637e-09	2.34681e-08		IER3	-2.37916	9.18172	-8.34962	5.62831e-11	1.71686e-09
HCK	1.2268	9.13661	7.44973	1.3418e-09	2.38692e-08		NR4A3	-1.63898	6.04473	-8.3439	5.74192e-11	1.7434e-09
ZNF260	1.07939	4.66752	7.44839	1.34817e-09	2.39477e-08		SCARNA17	-1.60644	6.82573	-8.30915	6.48305e-11	1.92538e-09
ACTL6A	1.49233	5.69209	7.39383	1.63652e-09	2.83085e-08		CMBL	-1.52284	9.1145	-8.28776	6.98638e-11	2.0426e-09
TNFSF13B	1.16868	9.52062	7.38999	1.65899e-09	2.86363e-08		NFKBIZ	-1.59902	10.5631	-8.23946	8.27266e-11	2.35593e-09
LOC101928288	1.19588	5.09415	7.3841	1.69407e-09	2.90775e-08		PRR11	-1.42325	9.17122	-8.23717	8.33927e-11	2.36735e-09
FRAT2	1.02601	7.15354	7.36394	1.81994e-09	3.08909e-08		GPRASP1	-1.24134	6.78697	-8.23532	8.3933e-11	2.37992e-09
MEGF9	1.6821	7.0876	7.35047	1.9092e-09	3.2227e-08		NLN	-1.12807	7.20138	-8.22531	8.69267e-11	2.45626e-09
IGSF6	1.28879	6.782	7.29551	2.32129e-09	3.80784e-08		STARD4	-1.16476	7.56514	-8.21571	8.99007e-11	2.52599e-09
PID1	1.09276	5.45185	7.23918	2.83647e-09	4.51066e-08		FLJ38717	-1.39904	6.51301	-8.21115	9.13461e-11	2.5467e-09
GCA	1.48701	8.52234	7.22055	3.0309e-09	4.77327e-08		BC044596	-1.19645	7.23778	-8.19439	9.68712e-11	2.6496e-09
SLC35A1	1.5194	7.89869	7.20746	3.17556e-09	4.95276e-08		DLGAP4	-1.02557	7.11415	-8.15693	1.10465e-10	2.96375e-09
MINPP1	1.1312	4.06799	7.2016	3.24243e-09	5.04787e-08		SNORD89	-1.11846	8.17122	-8.07039	1.49682e-10	3.79122e-09
THEMIS	1.76196	6.60901	7.19851	3.27833e-09	5.09403e-08		SERPINB9	-1.16381	8.4762	-8.0658	1.52113e-10	3.83499e-09
MSH2	1.28173	5.94862	7.18112	3.48779e-09	5.3683e-08		RP1-151F17.2	-1.51176	4.57262	-8.06565	1.52195e-10	3.83499e-09
FGL2	1.942	9.91125	7.17208	3.60185e-09	5.51261e-08		NR1D2	-1.10973	8.65302	-8.05516	1.57908e-10	3.93033e-09
CARD6	1.05586	6.39889	7.16702	3.66731e-09	5.59974e-08		ANKRD10-IT1	-1.23921	8.28188	-8.03746	1.68044e-10	4.13629e-09
KRCC1	1.44422	6.80442	7.11315	4.44316e-09	6.61387e-08		PDE4D	-1.01726	5.96126	-8.00151	1.90696e-10	4.60122e-09
ESYT1	1.07502	8.13003	7.08029	4.99509e-09	7.32953e-08		ATF3	-1.63479	6.84631	-7.98918	1.99151e-10	4.78157e-09
GVINP1	1.28724	6.38016	7.07842	5.02845e-09	7.37248e-08		ANKRD36B	-2.11667	7.13567	-7.98242	2.0395e-10	4.86557e-09
IGKV1-17	1.24544	6.70152	7.07653	5.06248e-09	7.40477e-08		RP6-99M1.2	-1.12424	3.64936	-7.97779	2.07303e-10	4.92411e-09
RPA3OS	1.21054	5.0181	7.07482	5.09337e-09	7.44126e-08		DBT	-1.15192	7.63852	-7.9729	2.10901e-10	4.99984e-09
UBE2L6	1.04915	8.81753	7.06439	5.28633e-09	7.68641e-08		AX746823	-2.16706	6.23377	-7.97134	2.12062e-10	5.0225e-09
PHF6	1.00247	5.9842	7.06045	5.36118e-09	7.77673e-08		DUSP10	-1.54939	7.11656	-7.96916	2.13696e-10	5.0563e-09
SAMD9L	1.55527	5.98665	7.05532	5.46008e-09	7.88277e-08		RP11-319G9.3	-1.38752	5.03375	-7.9284	2.46685e-10	5.73143e-09
MS4A4A	1.02787	5.61728	6.97673	7.2257e-09	1.00518e-07		JMY	-1.13489	7.35925	-7.91605	2.57664e-10	5.95257e-09
ACN9	1.2379	5.55014	6.96775	7.4607e-09	1.032e-07		GPCPD1	-1.04689	8.19467	-7.89704	2.75523e-10	6.31148e-09
TRAPPC12	1.05148	6.32651	6.92184	8.78805e-09	1.19266e-07		BC022892	-1.08478	4.27454	-7.89607	2.76459e-10	6.32698e-09
SLC35B3	1.05727	5.42172	6.91926	8.86917e-09	1.20233e-07		CDKN1A	-1.49857	9.08457	-7.86138	3.12445e-10	6.9934e-09
C2orf76	1.01246	4.60905	6.8803	1.01916e-08	1.35089e-07		BC041025	-1.36124	5.53276	-7.85853	3.15601e-10	7.05112e-09
AIM2	1.0729	6.5095	6.86936	1.0597e-08	1.39629e-07		RGCC	-2.01478	8.39416	-7.85511	3.19433e-10	7.12027e-09
DUSP6	1.60175	9.07588	6.8617	1.08906e-08	1.42805e-07		SNX9	-1.48299	7.25783	-7.85266	3.22212e-10	7.17259e-09
XAF1	1.39855	7.48275	6.84936	1.13807e-08	1.48119e-07		MXD1	-1.65678	7.57751	-7.83447	3.43567e-10	7.59265e-09
AMICA1	1.04312	8.79136	6.83413	1.2016e-08	1.5523e-07		RIPK2	-1.13584	8.04953	-7.80801	3.77211e-10	8.25407e-09
PLAC8	1.17178	10.1205	6.82209	1.25437e-08	1.61619e-07		RASGEF1B	-1.47398	5.41645	-7.78224	4.13169e-10	8.96862e-09
ANKRD20A8P	1.08141	3.44025	6.75911	1.57036e-08	1.94936e-07		FOSB	-2.64603	7.98237	-7.77216	4.28151e-10	9.22016e-09
NEK7	1.06332	8.61653	6.74673	1.64131e-08	2.021e-07		AK057978	-1.42298	5.51844	-7.76687	4.36225e-10	9.35545e-09
OMA1	1.14461	6.71928	6.71208	1.8573e-08	2.24622e-07		RP11-158G18.1	-2.35786	6.87638	-7.75678	4.52057e-10	9.61733e-09
abParts	1.03206	7.05587	6.70588	1.89883e-08	2.29191e-07		NFIL3	-1.53598	8.37127	-7.69989	5.52808e-10	1.14409e-08
IGKV4-1	1.03206	7.05587	6.70588	1.89883e-08	2.29191e-07		HYMAI	-1.21426	5.63502	-7.69299	5.66466e-10	1.16643e-08
LOC101928620	1.17571	6.91476	6.69158	1.99826e-08	2.39536e-07		PSMD6-AS2	-1.55728	7.63297	-7.69027	5.71945e-10	1.17574e-08
POU2AF1	1.17571	6.91476	6.69158	1.99826e-08	2.39536e-07		CLTC-IT1	-1.45644	4.99849	-7.64806	6.64113e-10	1.33489e-08
PSMB9	1.11329	9.29526	6.68427	2.05104e-08	2.44782e-07		RUFY2	-1.28157	5.03576	-7.63506	6.95413e-10	1.38189e-08
EMG1	1.14236	7.2136	6.63404	2.45357e-08	2.86391e-07		PPP1R16B	-1.02014	7.90796	-7.63409	6.97794e-10	1.3855e-08
IGKC	1.0632	8.91334	6.63321	2.46086e-08	2.87105e-07		ZNF721	-1.35466	8.89685	-7.62674	7.16206e-10	1.41745e-08
TRIM22	1.03546	9.90797	6.62453	2.53825e-08	2.94447e-07		CDK13	-1.24403	7.75968	-7.61012	7.59644e-10	1.48776e-08
FIG4	1.02057	7.66313	6.6072	2.70013e-08	3.1028e-07		NFKB2	-1.10489	6.49102	-7.60277	7.79687e-10	1.52335e-08
IGK	1.08932	9.41778	6.57626	3.01523e-08	3.41119e-07		AC004951.6	-1.74177	7.07705	-7.5992	7.89594e-10	1.54024e-08
TNFRSF17	1.18949	4.64052	6.57566	3.02161e-08	3.41286e-07		AX747182	-1.74177	7.07705	-7.5992	7.89594e-10	1.54024e-08
SAMD9	1.34576	6.1415	6.57094	3.07302e-08	3.45813e-07		SAMSN1	-1.24816	8.39303	-7.59844	7.91743e-10	1.54197e-08
PRKACB	1.28587	8.13225	6.56648	3.12229e-08	3.50229e-07		MIR22	-1.71561	8.43108	-7.57881	8.48768e-10	1.63351e-08
DNAJC13	1.00545	6.13488	6.56045	3.19017e-08	3.56534e-07		MIR22HG	-1.71561	8.43108	-7.57881	8.48768e-10	1.63351e-08
LCLAT1	1.04629	6.45524	6.52535	3.61554e-08	3.9646e-07		DNAJB14	-1.10297	8.28293	-7.56698	8.85139e-10	1.69152e-08
CD27	1.13061	8.31847	6.52349	3.63963e-08	3.98565e-07		ZBTB20	-1.30136	6.9882	-7.55215	9.3291e-10	1.77036e-08
TMEM251	1.44758	6.02118	6.52204	3.65846e-08	4.00269e-07		TMEM41B	-1.17103	7.10046	-7.53702	9.84346e-10	1.83659e-08
ASF1A	1.18355	6.59417	6.51756	3.71736e-08	4.05443e-07		AK090844	-1.02171	5.82533	-7.51854	1.05104e-09	1.94553e-08
TBCK	1.34852	6.14504	6.48839	4.12486e-08	4.44924e-07		SESN2	-1.06238	7.36921	-7.47808	1.21331e-09	2.18862e-08
IGHG2	1.03078	6.81677	6.4736	4.34827e-08	4.64716e-07		THBD	-2.02034	6.14917	-7.46924	1.25199e-09	2.25174e-08
ZNF559	1.33989	6.07619	6.45741	4.60659e-08	4.8721e-07		NFKBID	-1.08883	6.35519	-7.46199	1.28463e-09	2.30366e-08
CYBRD1	1.02777	6.12209	6.45586	4.63216e-08	4.89068e-07		C17orf104	-1.06716	4.51077	-7.45566	1.31381e-09	2.34395e-08
WBP1L	1.10474	7.59989	6.41988	5.26596e-08	5.47938e-07		BHLHE40	-1.2973	8.5412	-7.43286	1.42461e-09	2.50686e-08
PRF1	1.42824	9.66585	6.41485	5.36122e-08	5.55721e-07		LOC440354	-1.80122	7.56358	-7.39074	1.65461e-09	2.85809e-08
STAT1	1.11642	8.22502	6.41413	5.3751e-08	5.56687e-07		DDIT3	-1.34726	7.72214	-7.38927	1.66324e-09	2.86894e-08
RNASE2	1.10593	8.55509	6.40022	5.6483e-08	5.81777e-07		HBD	-2.2911	6.6003	-7.37491	1.75036e-09	2.9855e-08
ANXA4	1.03691	7.68441	6.39903	5.6723e-08	5.83757e-07		FAM46C	-1.01363	8.17133	-7.35231	1.89678e-09	3.20394e-08
DYNLL1	1.20161	9.23156	6.37377	6.20646e-08	6.30763e-07		PRPF38B	-1.34283	8.11402	-7.31854	2.13871e-09	3.56092e-08
MAD1L1	1.16919	6.92248	6.36427	6.42011e-08	6.50851e-07		RINT1	-1.0189	5.69611	-7.28495	2.41013e-09	3.93602e-08
BTN3A3	1.1262	8.64351	6.34313	6.92227e-08	6.94558e-07		AF090939	-1.47743	6.23242	-7.26514	2.58615e-09	4.17508e-08
IFI35	1.26316	6.9781	6.31608	7.62231e-08	7.53964e-07		AC068039.4	-1.06905	5.57984	-7.25659	2.66606e-09	4.28709e-08
IGHA2	1.03756	7.24036	6.28472	8.52289e-08	8.29946e-07		WHAMM	-1.24894	7.64803	-7.21937	3.04375e-09	4.78734e-08
TLR4	1.22513	6.57559	6.26779	9.05247e-08	8.76627e-07		TRIB1	-1.55685	7.47474	-7.21493	3.09222e-09	4.85421e-08
TSPAN13	1.12539	7.19656	6.21228	1.10294e-07	1.04085e-06		ZNF292	-1.1816	7.82683	-7.18893	3.39216e-09	5.24178e-08
DPYSL2	1.19992	9.03934	6.16046	1.32611e-07	1.22637e-06		TIPARP	-1.09298	8.84992	-7.17749	3.53317e-09	5.4279e-08
TBC1D9	1.08225	6.51134	6.09805	1.65533e-07	1.48585e-06		ZC3H12D	-1.10457	7.28068	-7.14152	4.01611e-09	6.0519e-08
BTN3A2	1.21753	8.90011	6.08944	1.70673e-07	1.52693e-06		LOC441259	-1.53467	6.55136	-7.13296	4.14034e-09	6.22375e-08
POP5	1.02761	7.51709	6.04355	2.00875e-07	1.75475e-06		ELL2	-1.5573	6.28393	-7.13109	4.16804e-09	6.26154e-08
CYP1B1	1.58	7.21989	5.98916	2.43623e-07	2.07334e-06		GPR183	-1.31685	9.40806	-7.12471	4.26385e-09	6.38394e-08
ALDH1A1	1.3184	6.87874	5.98219	2.49718e-07	2.11711e-06		SMG1P5	-1.00298	7.64429	-7.11692	4.3839e-09	6.54959e-08
FAM65B	1.21939	8.80459	5.97809	2.53373e-07	2.14437e-06		LOC100272216	-1.98202	7.08327	-7.11031	4.48834e-09	6.66488e-08
IQGAP1	1.02884	9.19655	5.97467	2.56465e-07	2.16117e-06		GABPB1-AS1	-1.17753	6.24254	-7.07238	5.13795e-09	7.50189e-08
ATP10D	1.23682	5.76236	5.96884	2.61811e-07	2.20055e-06		CTB-31O20.2	-1.20574	7.77577	-7.05738	5.42014e-09	7.83624e-08
RTN1	1.14218	6.38486	5.89915	3.3511e-07	2.7339e-06		ATG2A	-1.01241	8.20168	-7.05309	5.5035e-09	7.93608e-08
GBP1	1.43437	7.67473	5.86996	3.71583e-07	2.99348e-06		LOC101060596	-1.1637	6.07059	-6.98708	6.96376e-09	9.72062e-08
MIR8071-1	1.18871	7.56192	5.84028	4.12692e-07	3.29318e-06		LOC102723773	-1.1637	6.07059	-6.98708	6.96376e-09	9.72062e-08
MIR8071-2	1.18871	7.56192	5.84028	4.12692e-07	3.29318e-06		SMG1P7	-1.1637	6.07059	-6.98708	6.96376e-09	9.72062e-08
IGLC1	1.088	8.2535	5.82742	4.31894e-07	3.42294e-06		ZBTB10	-1.04687	5.71362	-6.95227	7.88404e-09	1.08442e-07
IGJ	1.35529	8.83146	5.79258	4.88448e-07	3.80662e-06		CD69	-1.08289	10.7497	-6.90251	9.41534e-09	1.26729e-07
IGLV1-44	1.022	8.05073	5.78251	5.0613e-07	3.92725e-06		RP11-489E7.4	-1.23703	6.61364	-6.89196	9.77638e-09	1.3079e-07
CRYZ	1.11971	5.96501	5.70713	6.60277e-07	4.95806e-06		DEFA1	-3.50154	8.42959	-6.8746	1.04008e-08	1.37414e-07
CYAT1	1.05267	8.65707	5.66255	7.72526e-07	5.69767e-06		DEFA1B	-3.50154	8.42959	-6.8746	1.04008e-08	1.37414e-07
HPSE	1.03623	6.46513	5.64228	8.29626e-07	6.08027e-06		DEFA3	-3.50154	8.42959	-6.8746	1.04008e-08	1.37414e-07
MX2	1.13577	7.80224	5.56723	1.07998e-06	7.6713e-06		A2M-AS1	-1.96587	5.7097	-6.86017	1.09503e-08	1.4328e-07
IL32	1.1581	9.64284	5.53124	1.2253e-06	8.58132e-06		HCAR3	-2.38335	7.47037	-6.81056	1.30705e-08	1.66651e-07
LOC283357	1.18245	4.85076	5.34755	2.32834e-06	1.52449e-05		CTA-29F11.1	-1.61552	7.2475	-6.79874	1.36332e-08	1.72833e-07
LRRK2	1.23679	6.8496	5.32929	2.48123e-06	1.6125e-05		IL1A	-1.1204	4.98586	-6.79634	1.37506e-08	1.74141e-07
FCRL3	1.13037	6.95459	5.32051	2.55818e-06	1.65884e-05		DUSP4	-1.39577	5.48897	-6.78028	1.45613e-08	1.82798e-07
EPSTI1	1.07784	7.23226	5.2746	3.00093e-06	1.91269e-05		LOC399900	-1.03711	5.25316	-6.73262	1.72603e-08	2.11043e-07
CLEC12A	1.13752	6.74375	5.12926	4.96382e-06	2.99924e-05		ZNF611	-1.21242	7.20715	-6.71439	1.84202e-08	2.23438e-07
MYOF	1.03327	5.80338	5.02388	7.13454e-06	4.14013e-05		CREM	-1.58843	7.33008	-6.68152	2.07125e-08	2.46712e-07
MX1	1.20859	8.32966	4.72886	1.94884e-05	0.000100876		GOLGA6L4	-1.15778	6.28051	-6.67809	2.09677e-08	2.49025e-07
CMPK2	1.24833	7.57027	4.05041	0.000181878	0.000738082		GOLGA6L5P	-1.15778	6.28051	-6.67809	2.09677e-08	2.49025e-07
RSAD2	1.25793	5.88572	3.81259	0.0003853	0.00144598		GOLGA6L9	-1.15778	6.28051	-6.67809	2.09677e-08	2.49025e-07
IFIT1	1.37977	6.17432	3.76017	0.000453415	0.00167079		LOC102724093	-1.15778	6.28051	-6.67809	2.09677e-08	2.49025e-07
HSPA1A	1.35556	7.76401	3.6592	0.000618648	0.00221035		THBS1	-1.63378	6.70483	-6.675	2.12001e-08	2.51541e-07
HSPA1B	1.35556	7.76401	3.6592	0.000618648	0.00221035		AK055910	-1.3301	5.06298	-6.63001	2.48908e-08	2.89843e-07
TMEM176B	1.19069	7.16503	3.22832	0.00222432	0.00682057		NOTCH2NL	-1.23231	9.3531	-6.59273	2.84312e-08	3.24121e-07
							HIST2H2AA3	-1.59379	9.89786	-6.5917	2.85368e-08	3.25021e-07
							HIST2H2AA4	-1.59379	9.89786	-6.5917	2.85368e-08	3.25021e-07
							SC5D	-1.24829	6.26652	-6.54809	3.33385e-08	3.70728e-07
							UPP1	-1.00484	7.66376	-6.54504	3.37031e-08	3.74271e-07
							AC092620.2	-1.23061	5.35106	-6.5335	3.51199e-08	3.87365e-07
							PTGS2	-2.47117	6.25576	-6.5316	3.53588e-08	3.89357e-07
							MALAT1	-1.77276	9.88299	-6.51986	3.68705e-08	4.02676e-07
							CPA3	-1.11341	6.44094	-6.51042	3.81332e-08	4.14614e-07
							GADD45B	-1.16025	8.21384	-6.48434	4.18497e-08	4.49424e-07
							CXCL2	-2.26199	5.29536	-6.47523	4.323e-08	4.62622e-07
							EAF1	-1.04366	8.08011	-6.45145	4.70552e-08	4.96171e-07
							CXCL1	-1.36338	4.98814	-6.42732	5.1283e-08	5.35209e-07
							FAM185A	-1.09951	5.46542	-6.37499	6.17946e-08	6.28541e-07
							NRIP3	-1.25956	6.14622	-6.26638	9.09786e-08	8.79976e-07
							ZNF700	-1.03257	5.96103	-6.24308	9.88463e-08	9.45597e-07
							JAG1	-1.03007	4.99768	-6.24051	9.97526e-08	9.53894e-07
							NLRP3	-1.16911	6.71832	-6.21982	1.07372e-07	1.01603e-06
							RNA45S5	-1.12334	6.39598	-6.20478	1.13275e-07	1.0661e-06
							MS4A3	-1.42343	4.92629	-6.1762	1.25394e-07	1.16847e-06
							AK126278	-1.41976	6.04806	-6.16527	1.30362e-07	1.20877e-06
							HBG1	-1.97105	8.00601	-6.13911	1.43065e-07	1.30966e-06
							HBG2	-1.97105	8.00601	-6.13911	1.43065e-07	1.30966e-06
							RP4-635E18.8	-1.01477	7.46659	-6.13373	1.45827e-07	1.33294e-06
							ACSL1	-1.27207	8.83172	-6.10649	1.60647e-07	1.44784e-06
							PPIF	-1.67322	8.51435	-6.06688	1.8491e-07	1.63575e-06
							NFKBIA	-1.15353	10.9238	-6.04691	1.98492e-07	1.73641e-06
							BCL2A1	-1.33832	10.2098	-5.98632	2.46085e-07	2.08937e-06
							B3GNT5	-1.55831	6.5301	-5.98329	2.48746e-07	2.11032e-06
							MIR155	-1.16127	4.48551	-5.96355	2.66773e-07	2.23074e-06
							MIR155HG	-1.16127	4.48551	-5.96355	2.66773e-07	2.23074e-06
							FOS	-1.57068	10.5696	-5.92911	3.01385e-07	2.48531e-06
							HIST1H1C	-1.47525	6.95455	-5.89834	3.36072e-07	2.73885e-06
							ZFYVE16	-1.10369	5.72879	-5.87412	3.66144e-07	2.95649e-06
							LOC102724356	-1.61174	6.81878	-5.82844	4.30332e-07	3.41167e-06
							TAF15	-1.10901	6.65234	-5.73971	5.8864e-07	4.4807e-06
							C15orf48	-2.44074	5.35135	-5.66958	7.53641e-07	5.58197e-06
							KBTBD8	-1.04725	6.45192	-5.63597	8.48242e-07	6.19998e-06
							HNRNPU-AS1	-1.59255	6.08423	-5.6331	8.56863e-07	6.24621e-06
							FCAR	-1.04676	5.91589	-5.62373	8.85544e-07	6.44106e-06
							AF520793	-1.56738	6.14375	-5.53534	1.20779e-06	8.47812e-06
							FTX	-1.12732	6.52349	-5.49594	1.38661e-06	9.57932e-06
							TUBB2A	-1.0088	6.57365	-5.47355	1.49969e-06	1.02676e-05
							LOC100131541	-1.57973	5.94031	-5.45462	1.60233e-06	1.08911e-05
							CCL20	-1.56073	5.49377	-5.41882	1.81587e-06	1.21699e-05
							PGAP1	-1.01476	4.78614	-5.31416	2.61537e-06	1.69338e-05
							DSERG1	-1.34793	6.38551	-5.27911	2.95427e-06	1.88681e-05
							MIR29B2	-1.03813	6.11657	-5.18391	4.10952e-06	2.53074e-05
							MIR29C	-1.03813	6.11657	-5.18391	4.10952e-06	2.53074e-05
							HBM	-1.15661	5.92991	-5.04986	6.52519e-06	3.82926e-05
							ADM	-1.56641	7.49326	-5.03756	6.80702e-06	3.97366e-05
							PLK2	-1.22045	4.61734	-5.01108	7.45501e-06	4.29652e-05
							PHLDA1	-1.18456	5.67405	-4.92571	9.98606e-06	5.56369e-05
							ALAS2	-1.05798	5.12191	-4.87944	1.16935e-05	6.41841e-05
							OLR1	-1.8372	4.36561	-4.75177	1.80366e-05	9.39577e-05
							IL1B	-1.81657	8.2485	-4.6279	2.73736e-05	0.000136433
							IFNG	-1.18622	6.02917	-4.62091	2.8023e-05	0.000139272
							LTF	-1.51795	6.83879	-4.59353	3.07136e-05	0.000151108
							CXCL3	-1.37485	4.51278	-4.42162	5.43994e-05	0.000251776
							PPP1R15A	-1.17674	8.27978	-4.41282	5.60036e-05	0.000258125
							GPR84	-1.10429	5.35488	-4.33303	7.28186e-05	0.000326216
							HIST1H2BG	-1.56227	7.16366	-4.33186	7.30968e-05	0.000327243
							HIST1H2BJ	-1.92971	7.04507	-4.32886	7.38212e-05	0.000329921
							RP11-196G18.24	-1.14187	4.84621	-3.83644	0.000357673	0.00135455
							SERPINB2	-1.36968	5.73414	-3.82062	0.00037577	0.00141453
							EGR3	-1.04299	5.48091	-3.77596	0.000431772	0.00160069
							HIST2H2BE	-1.0995	7.75563	-3.67576	0.000588069	0.00211128
							GUSBP9	-1.14161	6.59489	-3.54458	0.000876127	0.00301313
							IL1R2	-1.02076	6.19414	-3.27159	0.0019632	0.00611746
							EGR1	-1.28758	8.70348	-3.14068	0.00285689	0.00845273

## Sheet: Sheet3
			DEGs between SP-MS and Healthy control
up-regulated							down-regulated
Gene symble	logFC	AveExpr	t	P.Value	adj.P.Val		Gene symble	logFC	AveExpr	t	P.Value	adj.P.Val
TNFAIP8L2	1.35271	6.38799	17.3961	1.37064e-20	3.35011e-16		SBDS	-1.45144	9.12501	-14.2604	1.5716e-17	9.60325e-14
CCR2	2.73923	6.13392	15.9041	3.45094e-19	4.21739e-15		SBDSP1	-1.45144	9.12501	-14.2604	1.5716e-17	9.60325e-14
GIMAP8	2.14884	5.32035	14.1577	2.0148e-17	9.84915e-14		HAUS3	-1.63218	8.46333	-13.5878	8.1795e-17	2.85605e-13
CD180	1.06675	6.41925	13.9853	3.06643e-17	1.24916e-13		G0S2	-3.83483	9.46389	-13.5311	9.42236e-17	2.87877e-13
CETN3	2.02254	5.17066	12.8851	4.85194e-16	1.18591e-12		NXT1	-1.28066	8.17515	-12.5201	1.25277e-15	2.21689e-12
GIMAP4	2.62629	7.84554	12.7032	7.76787e-16	1.72602e-12		DDIT4	-1.49012	9.94111	-12.4094	1.67576e-15	2.40934e-12
TLR7	1.26224	5.21847	12.6357	9.26069e-16	1.88625e-12		CCNL1	-1.22362	9.59025	-12.2822	2.34527e-15	3.14354e-12
ATG4C	1.14373	4.74844	12.4972	1.33043e-15	2.21689e-12		BTG3	-1.67973	7.37471	-11.9601	5.54503e-15	4.87493e-12
C14orf119	1.58621	6.87489	12.4681	1.4359e-15	2.21689e-12		GABARAPL3	-2.47656	8.41013	-11.792	8.73534e-15	6.65159e-12
COPB2	1.5338	6.08042	12.2667	2.44364e-15	3.14354e-12		HBEGF	-2.29921	7.75023	-11.7745	9.15901e-15	6.65159e-12
LACTB2	1.54942	5.06691	12.2373	2.64228e-15	3.22913e-12		GABARAPL1	-2.43093	8.6677	-11.6644	1.23617e-14	7.94362e-12
LOC100505812	1.73919	6.50576	12.1341	3.47835e-15	3.96065e-12		CXCL8	-4.58662	9.96822	-11.6569	1.26189e-14	7.94362e-12
MRPS14	1.0135	5.87168	12.1249	3.56494e-15	3.96065e-12		DBF4	-1.39544	7.86147	-11.0752	6.31385e-14	2.70742e-11
GIMAP1-GIMAP5	1.46253	7.45895	12.0707	4.12076e-15	4.19665e-12		GZF1	-1.88332	6.81518	-10.9456	9.09398e-14	3.58508e-11
GIMAP5	1.46253	7.45895	12.0707	4.12076e-15	4.19665e-12		MOAP1	-1.03176	9.39338	-10.7416	1.62164e-13	5.64339e-11
TNFSF10	2.48391	7.41812	12.0194	4.72803e-15	4.6225e-12		SMAD7	-2.44547	7.54842	-10.4948	3.28956e-13	1.00504e-10
RNASEL	1.12337	5.66756	11.9787	5.27454e-15	4.87493e-12		RIPK2	-1.47975	8.06554	-10.3745	4.65728e-13	1.32364e-10
MRPS28	1.30915	6.34062	11.9515	5.67617e-15	4.87493e-12		TNFAIP3	-1.64279	11.2472	-10.2989	5.79922e-13	1.61073e-10
CALHM2	1.16887	6.71946	11.8611	7.24437e-15	5.77103e-12		CSRNP1	-1.73737	8.26995	-10.2732	6.24935e-13	1.64868e-10
DUSP7	1.30221	5.39652	11.8573	7.31945e-15	5.77103e-12		NR4A2	-2.24846	9.38937	-9.83553	2.26088e-12	4.60503e-10
CX3CR1	3.531	7.78558	11.7708	9.25268e-15	6.65159e-12		MAFF	-2.11602	8.46106	-9.79153	2.57637e-12	4.97239e-10
TXNDC9	1.27405	6.74379	11.7571	9.60299e-15	6.70618e-12		JMJD6	-1.4381	7.49625	-9.76999	2.74677e-12	5.0861e-10
NDUFAF1	1.5958	5.11169	11.6972	1.13046e-14	7.67522e-12		CD83	-2.09841	9.662	-9.63537	4.10411e-12	6.56498e-10
ST8SIA4	1.96006	5.02439	11.6552	1.2675e-14	7.94362e-12		CLK1	-1.07861	9.88137	-9.63493	4.10949e-12	6.56498e-10
PPIL1	1.57814	5.18795	11.5488	1.69631e-14	1.01125e-11		JOSD1	-1.30005	9.33692	-9.56158	5.11953e-12	7.54649e-10
RSBN1L	1.17864	5.98047	11.5252	1.8097e-14	1.02867e-11		GADD45A	-1.19085	8.02858	-9.353	9.59912e-12	1.27512e-09
DCP1B	1.32033	5.43484	11.4942	1.97076e-14	1.09476e-11		PIGA	-1.26583	6.63389	-9.34543	9.82152e-12	1.29761e-09
ACTL6A	2.01383	5.69369	11.389	2.63478e-14	1.39998e-11		PTS	-1.14877	7.2777	-9.33103	1.02593e-11	1.34095e-09
NLRC4	1.33004	5.01043	11.334	3.06764e-14	1.56207e-11		RP11-469M7.1	-1.42821	7.94624	-9.30812	1.0997e-11	1.40727e-09
ZC3H13	1.21028	6.20748	11.2416	3.96606e-14	1.89388e-11		PFKFB3	-1.90589	8.59867	-9.26211	1.26449e-11	1.54533e-09
TP53	1.14757	5.5332	11.2359	4.02919e-14	1.89388e-11		C9orf38	-1.15098	5.04365	-9.25016	1.31124e-11	1.5822e-09
FAM114A2	1.04801	5.28987	11.1676	4.87567e-14	2.20687e-11		MIR22	-1.69601	8.63045	-9.22801	1.40259e-11	1.64818e-09
TLR8	2.11562	7.27862	11.1005	5.88264e-14	2.61424e-11		MIR22HG	-1.69601	8.63045	-9.22801	1.40259e-11	1.64818e-09
TRANK1	1.09303	6.51885	11.0904	6.05086e-14	2.64099e-11		IDI1	-1.02666	8.50378	-9.19414	1.5549e-11	1.78427e-09
TRIM5	1.39075	4.77243	11.0609	6.57374e-14	2.77027e-11		JUN	-2.27924	8.72733	-9.11884	1.95646e-11	2.10659e-09
GIMAP6	2.36356	7.4601	10.967	8.56044e-14	3.43007e-11		TIPARP	-1.27784	8.9128	-9.09138	2.12776e-11	2.22251e-09
RACGAP1	1.44001	4.47204	10.8511	1.18822e-13	4.53789e-11		SIK1	-1.57437	8.0535	-9.00204	2.79764e-11	2.73875e-09
MRPL18	1.00064	7.25183	10.8259	1.27606e-13	4.72567e-11		ZNF331	-2.14463	9.07854	-8.87846	4.09171e-11	3.5339e-09
HIBCH	1.47535	5.44635	10.8169	1.30932e-13	4.77647e-11		AK057657	-1.05477	9.95402	-8.83048	4.74475e-11	3.91795e-09
AL833181	1.47653	6.05871	10.8037	1.35923e-13	4.85826e-11		CTA-29F11.1	-2.24427	7.2249	-8.73975	6.28274e-11	4.875e-09
SLC38A9	1.42421	5.8631	10.8005	1.37149e-13	4.85826e-11		JUND	-1.00102	9.42642	-8.68837	7.36838e-11	5.4741e-09
MRPS31	1.63271	6.15631	10.731	1.67169e-13	5.67494e-11		HIF1A	-1.01435	11.1756	-8.66546	7.91201e-11	5.81484e-09
SPOP	1.18675	6.99811	10.7089	1.7805e-13	5.96151e-11		IRS2	-1.03082	9.34588	-8.63272	8.75992e-11	6.31593e-09
ETNK1	1.48035	5.96516	10.5596	2.73004e-13	8.66594e-11		PMAIP1	-1.52502	9.01238	-8.55167	1.12773e-10	7.63544e-09
GIN1	1.10048	4.53124	10.4843	3.39014e-13	1.02298e-10		PLAUR	-1.91147	8.80262	-8.48638	1.38293e-10	8.80246e-09
NUDCD1	1.09103	5.16045	10.4374	3.88179e-13	1.14312e-10		VEGFA	-2.15423	7.68353	-8.41165	1.74762e-10	1.0547e-08
NIF3L1	1.30428	6.37623	10.383	4.54375e-13	1.30657e-10		GRASP	-1.0007	7.5951	-8.39753	1.82679e-10	1.0917e-08
RP11-395B7.7	1.43917	6.39375	10.2827	6.07833e-13	1.64868e-10		SKIL	-2.07012	8.05823	-8.35759	2.07084e-10	1.20801e-08
CISD1	1.02995	5.17878	10.2726	6.25971e-13	1.64868e-10		MIR6732	-1.58191	7.65417	-8.33919	2.19414e-10	1.26783e-08
CHCHD1	1.01521	6.99785	10.2128	7.45209e-13	1.9173e-10		ZC3H12A	-1.58191	7.65417	-8.33919	2.19414e-10	1.26783e-08
FUNDC1	1.38105	5.53456	10.1542	8.84183e-13	2.20523e-10		SYAP1	-1.36935	8.46287	-8.29096	2.5537e-10	1.42506e-08
VPS35	1.25916	7.221	10.0953	1.05084e-12	2.59441e-10		FOSL2	-1.15894	7.75548	-8.2902	2.55979e-10	1.4252e-08
LCORL	1.11313	5.46686	10.0825	1.09087e-12	2.6663e-10		RP11-489E7.4	-1.22206	6.75766	-8.25766	2.83616e-10	1.55778e-08
WDR7	1.09078	5.60508	10.0121	1.34163e-12	3.15309e-10		RGPD3	-1.10909	7.76188	-8.22628	3.13124e-10	1.6494e-08
P2RY14	1.48371	5.23481	10.0055	1.36798e-12	3.18441e-10		RGPD4	-1.10909	7.76188	-8.22628	3.13124e-10	1.6494e-08
FPGT	1.25407	4.62637	9.95355	1.59454e-12	3.67677e-10		RGPD5	-1.10909	7.76188	-8.22628	3.13124e-10	1.6494e-08
C11orf48	1.05355	7.11376	9.9377	1.67093e-12	3.78157e-10		RGPD6	-1.10909	7.76188	-8.22628	3.13124e-10	1.6494e-08
LOC102288414	1.05355	7.11376	9.9377	1.67093e-12	3.78157e-10		RGPD8	-1.10909	7.76188	-8.22628	3.13124e-10	1.6494e-08
RP11-5C23.1	1.00897	5.31236	9.92608	1.72925e-12	3.87764e-10		SLC7A5	-2.16229	7.77298	-8.20836	3.31355e-10	1.72686e-08
FAM98B	1.01455	5.91403	9.91735	1.77446e-12	3.90732e-10		SLC2A3	-1.51879	9.11375	-8.15349	3.94098e-10	1.99019e-08
CDK2AP2	1.00668	6.22876	9.90593	1.83538e-12	3.962e-10		SLC2A14	-1.62579	8.89804	-8.13298	4.2052e-10	2.09335e-08
GTF2E1	1.15344	5.75322	9.85542	2.13144e-12	4.41492e-10		TP53INP2	-1.39377	7.4168	-8.0917	4.79264e-10	2.34222e-08
TICAM2	1.13914	5.83716	9.81782	2.3829e-12	4.774e-10		OSM	-1.90229	7.64615	-8.09008	4.81717e-10	2.34545e-08
PTER	1.63106	6.64131	9.79802	2.52718e-12	4.94155e-10		RIT1	-1.1452	8.62421	-8.06899	5.15042e-10	2.47321e-08
ARL11	1.04339	4.70416	9.78794	2.60399e-12	4.97239e-10		ZBTB10	-1.18299	5.78716	-8.05769	5.33833e-10	2.55341e-08
CYSLTR1	1.34528	6.091	9.77165	2.73322e-12	5.0861e-10		IFRD1	-1.24798	7.69304	-7.98064	6.81864e-10	3.12685e-08
MED11	1.00274	6.38327	9.76166	2.81572e-12	5.17457e-10		ETV3	-1.14459	7.47101	-7.96225	7.22961e-10	3.23637e-08
SUCLA2	1.51257	5.92801	9.72575	3.13349e-12	5.59042e-10		EAF1	-1.26053	8.12704	-7.81469	1.1574e-09	4.6759e-08
DDX60	2.46283	6.63001	9.71418	3.24344e-12	5.6904e-10		RGPD1	-1.16225	7.18633	-7.80997	1.17501e-09	4.70812e-08
RAB10	2.12013	7.76279	9.70707	3.31289e-12	5.6904e-10		RGPD2	-1.16225	7.18633	-7.80997	1.17501e-09	4.70812e-08
TRIM34	1.08325	5.80208	9.70542	3.32921e-12	5.6904e-10		NFKBIA	-1.33264	10.9954	-7.79725	1.22375e-09	4.83994e-08
TRIM6-TRIM34	1.08325	5.80208	9.70542	3.32921e-12	5.6904e-10		NFIL3	-1.46685	8.56653	-7.71573	1.58868e-09	6.05782e-08
CRYBG3	1.05846	5.55611	9.70189	3.36449e-12	5.71075e-10		WHAMM	-1.31285	7.76776	-7.66388	1.87606e-09	6.94766e-08
DYNC1I2	1.40142	6.24056	9.68307	3.55889e-12	5.99905e-10		BHLHE40	-1.34986	8.67007	-7.63658	2.04792e-09	7.43765e-08
AHSA1	1.08432	7.47773	9.66443	3.7626e-12	6.21257e-10		PDE4B	-1.29553	8.42717	-7.5854	2.41405e-09	8.46545e-08
CTR9	1.09609	7.95116	9.66225	3.78722e-12	6.21257e-10		SLC25A33	-1.00585	7.28809	-7.52223	2.95832e-09	9.88894e-08
SYNRG	1.19846	6.72292	9.64771	3.95541e-12	6.40252e-10		EREG	-2.30254	6.63476	-7.50779	3.09923e-09	1.03063e-07
LOC101927204	1.14108	5.0842	9.6284	4.19055e-12	6.651e-10		RGS1	-2.25331	8.87734	-7.46866	3.51595e-09	1.15043e-07
PCMT1	1.30865	7.84831	9.61517	4.35988e-12	6.74457e-10		ZFP36	-1.06086	11.1115	-7.45919	3.625e-09	1.17666e-07
SAMD9L	1.89658	5.92261	9.60913	4.43947e-12	6.8245e-10		NLRP3	-1.53324	6.7315	-7.45813	3.63747e-09	1.17914e-07
LOC100996412	1.60764	7.19641	9.60352	4.5147e-12	6.89677e-10		DUSP10	-1.65963	7.25504	-7.45459	3.67927e-09	1.18674e-07
ZNF260	1.16817	4.57494	9.59135	4.68235e-12	7.06456e-10		YPEL5	-1.07051	10.8849	-7.41022	4.24588e-09	1.33622e-07
COA3	1.42776	6.54488	9.58835	4.72466e-12	7.08468e-10		CCNH	-1.21215	8.65332	-7.40217	4.35775e-09	1.36379e-07
SMC1A	1.01432	6.33703	9.56121	5.12527e-12	7.54649e-10		PLK3	-1.08855	7.0117	-7.3395	5.33645e-09	1.61628e-07
IFI16	1.23688	8.73726	9.54908	5.31533e-12	7.77948e-10		IER3	-2.38215	9.4484	-7.30353	5.99524e-09	1.77404e-07
EMC2	1.03078	6.31913	9.53409	5.56005e-12	8.04135e-10		NFKBIE	-1.08869	7.30655	-7.2801	6.46788e-09	1.882e-07
TRIM56	1.05188	6.80313	9.49348	6.28212e-12	8.88904e-10		CDKN1A	-1.468	9.26309	-7.23536	7.4771e-09	2.12765e-07
LOC283357	2.00533	4.98517	9.48265	6.49035e-12	9.11707e-10		ZBTB21	-1.11706	8.20618	-7.21859	7.89527e-09	2.21819e-07
ARFIP1	1.72258	5.55863	9.45654	7.02129e-12	9.80654e-10		NR4A3	-1.75387	6.19177	-7.20445	8.2657e-09	2.29319e-07
NHLRC3	1.05902	5.61939	9.44758	7.21346e-12	9.96109e-10		DUSP2	-1.00057	9.28924	-7.16643	9.35138e-09	2.5256e-07
MOSPD2	1.12931	6.35635	9.38745	8.64923e-12	1.16156e-09		THBD	-2.28339	6.29096	-7.1271	1.0626e-08	2.7957e-07
MAT2B	1.06992	8.41104	9.32882	1.03283e-11	1.34279e-09		STARD4	-1.00066	7.74951	-7.10468	1.14294e-08	2.9593e-07
IRF2	1.96909	5.88132	9.30212	1.11988e-11	1.41116e-09		NAMPT	-1.29705	10.6805	-7.06408	1.30425e-08	3.28305e-07
IDH1	1.90588	5.97537	9.2987	1.13156e-11	1.41116e-09		DOCK4	-1.97734	5.31706	-7.05759	1.3321e-08	3.33599e-07
ATP6V1C1	1.17928	5.42218	9.28393	1.18343e-11	1.4683e-09		OTUD1	-1.12904	7.69942	-7.00323	1.58998e-08	3.8288e-07
GBP1	1.82189	7.63931	9.27848	1.20318e-11	1.47982e-09		LINC-PINT	-1.15052	7.57927	-6.9318	2.00679e-08	4.60563e-07
ZNF146	1.26652	6.88862	9.23835	1.35916e-11	1.62051e-09		GADD45B	-1.32243	8.29166	-6.92454	2.0549e-08	4.68526e-07
FASTKD1	1.38318	6.15769	9.23517	1.3724e-11	1.62836e-09		ARL4A	-1.32563	7.80692	-6.87415	2.42212e-08	5.36245e-07
C6orf211	1.75614	6.48452	9.2119	1.47307e-11	1.70638e-09		SCML1	-1.31424	6.45599	-6.81047	2.98203e-08	6.38239e-07
IPO8	1.18541	6.51799	9.16568	1.69581e-11	1.92469e-09		AREG	-1.7251	6.36774	-6.71842	4.02913e-08	8.27564e-07
PTPN6	1.23041	8.88987	9.1647	1.70089e-11	1.92469e-09		IER5	-1.04805	10.3486	-6.6124	5.70067e-08	1.10147e-06
OAS1	2.06917	6.25435	9.15339	1.76056e-11	1.97031e-09		ZBTB43	-1.20727	7.30825	-6.55917	6.78678e-08	1.27996e-06
TSNAX	1.19204	7.92545	9.13373	1.86948e-11	2.04905e-09		RANBP2	-1.00315	8.26416	-6.51502	7.84343e-08	1.44142e-06
MCM3	1.05251	6.88279	9.13129	1.88344e-11	2.05514e-09		C12orf79	-1.15874	4.8904	-6.46978	9.0975e-08	1.64225e-06
DTX3L	1.35608	8.50652	9.10886	2.01702e-11	2.14348e-09		ATF3	-1.6361	7.0298	-6.46814	9.14671e-08	1.64992e-06
METTL7A	1.12992	7.53625	9.08697	2.15663e-11	2.23357e-09		BRE-AS1	-1.70164	5.57731	-6.43656	1.01449e-07	1.80075e-06
PREPL	1.13045	5.66809	9.08275	2.18464e-11	2.25304e-09		SAMSN1	-1.15954	8.56225	-6.26503	1.78125e-07	2.90636e-06
DNAJC24	1.19835	5.2674	9.05059	2.41073e-11	2.44494e-09		DDIT3	-1.30607	7.88709	-6.24283	1.91593e-07	3.06875e-06
PVRIG	1.0258	7.12603	9.01568	2.68301e-11	2.66578e-09		ERMN	-1.02311	5.38346	-6.20801	2.14798e-07	3.38278e-06
C9orf41	1.22673	5.21952	8.98355	2.96104e-11	2.86579e-09		ATG2A	-1.09528	8.28865	-6.18656	2.30475e-07	3.59264e-06
SLC35B3	1.41847	5.42017	8.98299	2.96613e-11	2.86579e-09		SGK1	-1.42055	10.0525	-6.17339	2.40664e-07	3.72063e-06
HLTF	1.34144	5.85277	8.96821	3.10397e-11	2.96226e-09		PHACTR1	-1.69396	7.12433	-6.16854	2.44528e-07	3.76844e-06
SLFN5	1.09429	7.53074	8.96708	3.11472e-11	2.96226e-09		FOSB	-2.5398	8.31458	-6.15803	2.53113e-07	3.87146e-06
GAPT	2.11509	6.13825	8.95838	3.19912e-11	3.00496e-09		RGCC	-1.88749	8.66219	-6.13946	2.69026e-07	4.08165e-06
SLC46A2	1.03132	5.14173	8.9574	3.20879e-11	3.00496e-09		TRIB1	-1.54585	7.65347	-6.13794	2.70371e-07	4.09387e-06
GIMAP7	1.73445	7.99287	8.9528	3.25446e-11	3.036e-09		FCAR	-1.39997	5.91886	-6.12588	2.81299e-07	4.23249e-06
MTIF3	1.26152	5.77586	8.95158	3.26678e-11	3.036e-09		PPIF	-1.93867	8.61632	-6.08586	3.20797e-07	4.68954e-06
AMMECR1	1.05052	5.85875	8.95034	3.27923e-11	3.03602e-09		GPR183	-1.35717	9.5431	-6.04688	3.64606e-07	5.23294e-06
LOC100505549	1.18406	6.03569	8.9215	3.58349e-11	3.264e-09		TGIF1	-1.0339	6.13439	-6.0032	4.20829e-07	5.90805e-06
SLC35A5	1.8037	6.09826	8.90971	3.71595e-11	3.3639e-09		ELL2	-1.58073	6.45151	-5.99616	4.30676e-07	6.02207e-06
NDUFB3	1.01267	7.39218	8.8876	3.97795e-11	3.47247e-09		B3GNT5	-1.94045	6.58122	-5.98108	4.52524e-07	6.27373e-06
LINC00324	1.09684	6.03923	8.88374	4.02559e-11	3.48913e-09		MAP3K8	-1.2193	8.42064	-5.86658	6.58946e-07	8.56354e-06
C11orf54	1.32208	5.98922	8.8499	4.46857e-11	3.77927e-09		ADM	-1.99426	7.53043	-5.85081	6.93932e-07	8.95989e-06
MRPL27	1.04769	7.00209	8.84074	4.5967e-11	3.82151e-09		LINC00936	-1.22588	9.40031	-5.83178	7.38638e-07	9.43742e-06
TMEM260	1.32024	6.71631	8.80155	5.18858e-11	4.21326e-09		RASGEF1B	-1.35546	5.62079	-5.81251	7.86806e-07	9.9437e-06
DDX60L	1.51678	6.96162	8.77082	5.7062e-11	4.50027e-09		CREM	-1.42484	7.56194	-5.79899	8.22481e-07	1.03517e-05
GOLPH3L	1.29422	5.93178	8.77073	5.70773e-11	4.50027e-09		CXCL16	-1.21721	7.7897	-5.79606	8.30421e-07	1.04302e-05
PIN4	1.0723	6.41649	8.76532	5.80416e-11	4.55837e-09		GAFA1	-1.18608	4.54778	-5.74214	9.90973e-07	1.21899e-05
ZDHHC16	1.05268	5.95731	8.74587	6.16471e-11	4.80755e-09		JAG1	-1.17058	5.0679	-5.70243	1.12868e-06	1.35965e-05
OSBPL11	1.15049	6.77703	8.73745	6.32766e-11	4.87888e-09		RP6-99M1.2	-1.00434	3.81481	-5.68064	1.21219e-06	1.44435e-05
KLHL8	1.04995	6.74336	8.72574	6.56158e-11	5.01291e-09		SLC25A37	-1.07597	7.76494	-5.67487	1.23531e-06	1.46405e-05
TCL1A	2.03956	6.64165	8.72013	6.6767e-11	5.05238e-09		SNX9	-1.26146	7.49666	-5.65401	1.32264e-06	1.5465e-05
CASP8AP2	1.48276	5.42956	8.71669	6.74832e-11	5.08405e-09		TUBB2A	-1.18704	6.62921	-5.6311	1.42565e-06	1.646e-05
DMXL1	1.76987	6.27163	8.70942	6.90238e-11	5.17509e-09		PPP1R15A	-1.57435	8.28294	-5.53419	1.95734e-06	2.16339e-05
DENND2D	1.27787	6.93556	8.66419	7.94322e-11	5.81484e-09		SC5D	-1.17224	6.43167	-5.40049	3.02831e-06	3.13818e-05
CTC-444N24.11	1.17923	5.87994	8.64351	8.47079e-11	6.18039e-09		MXD1	-1.25233	7.89535	-5.40042	3.02902e-06	3.13818e-05
CPOX	1.15727	5.80169	8.63048	8.82144e-11	6.34158e-09		ID1	-1.53539	6.11303	-5.37651	3.27449e-06	3.35859e-05
RNF111	1.08883	7.24862	8.62252	9.04257e-11	6.48148e-09		DUSP4	-1.35871	5.65804	-5.36492	3.40044e-06	3.46098e-05
MRPL51	1.04544	7.14698	8.62078	9.0917e-11	6.49764e-09		THBS1	-1.54105	6.91877	-5.35405	3.52299e-06	3.56264e-05
LRRN3	1.98217	6.42996	8.61802	9.17013e-11	6.53459e-09		ACSL1	-1.17463	9.00649	-5.2969	4.24316e-06	4.18191e-05
GPR171	1.49369	7.01658	8.58727	1.0092e-10	7.12912e-09		PLIN2	-1.04195	7.76423	-5.23106	5.25545e-06	5.02951e-05
COA4	1.09587	6.58206	8.56618	1.0778e-10	7.53323e-09		CXCL2	-2.2984	5.538	-5.20692	5.68375e-06	5.37417e-05
COG6	1.13633	4.94862	8.55854	1.10379e-10	7.63544e-09		FOS	-1.27664	10.8419	-5.19284	5.94929e-06	5.60572e-05
MINPP1	1.17172	3.9539	8.55837	1.10437e-10	7.63544e-09		RP1-151F17.2	-1.21957	4.83765	-5.14854	6.86787e-06	6.31782e-05
TRAPPC6B	1.41998	5.89726	8.55582	1.11319e-10	7.63544e-09		KBTBD8	-1.1685	6.53033	-5.11997	7.5335e-06	6.82736e-05
MINA	1.12134	5.85775	8.55261	1.12443e-10	7.63544e-09		RAB33A	-1.01077	5.44141	-5.06414	9.02372e-06	7.92335e-05
OXR1	1.11209	5.9753	8.54964	1.1349e-10	7.66274e-09		BCL2A1	-1.33506	10.3614	-5.0221	1.03355e-05	8.86384e-05
ICAM2	1.32835	8.6344	8.54484	1.152e-10	7.75192e-09		NINJ1	-1.08544	8.4056	-5.00147	1.10464e-05	9.35534e-05
GALNT7	1.52828	6.17569	8.54329	1.15762e-10	7.75192e-09		SNORD3A	-1.34969	5.95667	-4.81424	2.01546e-05	0.000156387
GTF2H5	1.02617	5.4368	8.52813	1.21373e-10	8.01164e-09		SNORD3B-1	-1.34969	5.95667	-4.81424	2.01546e-05	0.000156387
HERC4	1.0235	5.26466	8.5207	1.24221e-10	8.15922e-09		SNORD3B-2	-1.34969	5.95667	-4.81424	2.01546e-05	0.000156387
GIMAP1	1.47509	7.36648	8.51624	1.25965e-10	8.23217e-09		SNORD3C	-1.34969	5.95667	-4.81424	2.01546e-05	0.000156387
SPTSSA	1.08688	5.98701	8.5133	1.27128e-10	8.26398e-09		SNORD3D	-1.34969	5.95667	-4.81424	2.01546e-05	0.000156387
NOC3L	1.30417	5.75025	8.50544	1.3029e-10	8.38039e-09		NRIP3	-1.21785	6.30147	-4.80861	2.05212e-05	0.000158727
ATP11C	1.28015	5.24883	8.48071	1.40766e-10	8.93666e-09		TREM1	-1.28758	8.62517	-4.68562	3.03786e-05	0.000220854
CREB1	1.12207	7.18335	8.47564	1.43016e-10	9.05594e-09		C15orf48	-2.50002	5.60667	-4.64927	3.4098e-05	0.000243834
SP4	1.0139	7.19146	8.46295	1.48813e-10	9.35033e-09		PLK2	-1.35395	4.71125	-4.4689	6.02834e-05	0.000397799
BFAR	1.004	7.05433	8.45888	1.50718e-10	9.38065e-09		MN1	-1.11731	4.55958	-4.46819	6.04184e-05	0.000398447
ATF1	1.22569	6.55201	8.44906	1.55426e-10	9.62606e-09		HCAR3	-1.86484	7.90701	-4.32682	9.40316e-05	0.0005837
NAGK	1.3237	8.41212	8.44717	1.56352e-10	9.62606e-09		CCL3	-1.57048	8.90487	-4.31018	9.90293e-05	0.000608925
DDX58	1.01989	5.9767	8.43527	1.6229e-10	9.94156e-09		CCL3L1	-1.57048	8.90487	-4.31018	9.90293e-05	0.000608925
ASF1A	1.29955	6.49872	8.42911	1.65455e-10	1.00758e-08		CCL3L3	-1.57048	8.90487	-4.31018	9.90293e-05	0.000608925
POT1	1.03878	5.90844	8.42776	1.66156e-10	1.00774e-08		CCL20	-1.54789	5.67353	-4.27746	0.00010963	0.000666727
CNOT6	1.05627	6.92613	8.39559	1.83793e-10	1.09301e-08		SERPINB2	-1.82411	5.74054	-4.21389	0.000133484	0.000791322
GTF2H1	1.02293	5.35387	8.37474	1.96223e-10	1.1529e-08		GPR84	-1.25385	5.43051	-4.01585	0.000244996	0.00132532
PRKACB	1.53366	8.06812	8.36032	2.05318e-10	1.20057e-08		IFNG	-1.24488	6.14356	-3.94927	0.000299817	0.0015773
AGL	1.2721	7.083	8.32386	2.3025e-10	1.31984e-08		HIST1H1C	-1.19364	7.21204	-3.78053	0.000497419	0.00242625
RP11-732A19.1	1.11744	4.43307	8.31614	2.35913e-10	1.33786e-08		PHLDA1	-1.13101	5.82472	-3.74936	0.000545685	0.00262087
PDHB	1.15564	7.52482	8.3095	2.40887e-10	1.35976e-08		OLR1	-1.82646	4.57579	-3.73179	0.000574847	0.00273834
SKA2	1.2752	6.04496	8.29896	2.4902e-10	1.3928e-08		IL1B	-1.77608	8.46602	-3.72447	0.00058743	0.00278687
NEK7	1.40695	8.60859	8.28201	2.62666e-10	1.45209e-08		EGR3	-1.22905	5.53777	-3.71284	0.000607988	0.00287269
LOC284837	1.4096	6.25614	8.24564	2.94572e-10	1.61072e-08		CXCL3	-1.40931	4.65625	-3.5889	0.000874771	0.00388536
COQ5	1.20423	6.044	8.24131	2.98623e-10	1.6256e-08		IL1R2	-1.34706	6.20293	-3.58662	0.000880587	0.00390969
TMEM69	1.24329	6.83199	8.24031	2.99569e-10	1.62712e-08		PTGS2	-1.58696	6.82114	-3.47623	0.00121226	0.00510512
DCK	1.51859	7.9174	8.23371	3.05866e-10	1.64307e-08
ZMYM6NB	1.51375	6.70608	8.21069	3.28922e-10	1.71784e-08
PEX11B	1.14227	6.27737	8.19011	3.51009e-10	1.80618e-08
TRPS1	1.03126	6.39211	8.18241	3.59654e-10	1.84678e-08
RNF20	1.52942	7.43321	8.13745	4.14606e-10	2.06812e-08
OMA1	1.4943	6.70416	8.12848	4.26545e-10	2.11903e-08
NUP43	1.26309	6.32886	8.10339	4.61822e-10	2.27578e-08
HMG20A	1.02895	6.40351	8.10018	4.66544e-10	2.29442e-08
ST6GAL1	1.28146	7.03348	8.08682	4.86726e-10	2.36512e-08
LOC101930324	1.18788	7.26294	8.08165	4.94769e-10	2.39943e-08
LRIF1	1.4927	4.85435	8.06599	5.19969e-10	2.49198e-08
GOLGA5	1.0454	6.89944	8.05041	5.46311e-10	2.60734e-08
CLOCK	1.15626	6.57729	8.04987	5.47242e-10	2.60734e-08
TLR5	1.39047	6.36104	8.01452	6.12262e-10	2.88898e-08
SLC16A7	1.22601	5.83274	8.00607	6.28926e-10	2.96189e-08
MGME1	1.01765	6.4048	8.00511	6.3084e-10	2.96479e-08
SGK223	1.47288	6.13027	7.99098	6.59812e-10	3.03712e-08
FGD4	1.70099	5.68469	7.9859	6.70573e-10	3.08085e-08
CTBP2	1.19101	7.86926	7.97897	6.85499e-10	3.13764e-08
CBR4	1.23732	6.19393	7.97817	6.87255e-10	3.13979e-08
MNDA	2.24688	9.75453	7.97009	7.05136e-10	3.19166e-08
HDHD1	1.09681	6.7753	7.96547	7.15595e-10	3.20928e-08
MSH2	1.39399	5.84091	7.94587	7.61646e-10	3.35426e-08
LYRM7	1.22303	6.15372	7.92854	8.04873e-10	3.50048e-08
MIB1	1.11216	6.10641	7.91547	8.3908e-10	3.6107e-08
PHF6	1.23524	5.94707	7.90163	8.76924e-10	3.75372e-08
LOC101929886	1.07018	6.37561	7.89859	8.85458e-10	3.77045e-08
SOS1	1.05107	5.993	7.89544	8.94404e-10	3.79531e-08
MRPS18C	1.01903	6.00955	7.87472	9.55513e-10	3.98985e-08
EDEM3	1.11382	6.83303	7.86317	9.91397e-10	4.12104e-08
PARP1	1.02296	6.99108	7.83586	1.08172e-09	4.42872e-08
XPO1	1.22736	8.25025	7.83508	1.08439e-09	4.43224e-08
STAT1	1.24555	8.14139	7.82205	1.1305e-09	4.60527e-08
NNT-AS1	1.3145	4.91186	7.80527	1.19277e-09	4.75538e-08
GBP3	1.46493	6.42826	7.80423	1.19677e-09	4.75538e-08
TMEM87B	1.19676	6.44105	7.78906	1.25625e-09	4.95246e-08
MEF2C	1.45588	6.9966	7.78818	1.2598e-09	4.95844e-08
PHF14	1.45278	5.49457	7.77677	1.30662e-09	5.12624e-08
OIP5-AS1	1.33376	7.18105	7.73035	1.51597e-09	5.85359e-08
TDRD7	1.01732	6.13913	7.7232	1.55109e-09	5.95161e-08
CARD6	1.0548	6.27976	7.70438	1.64752e-09	6.23356e-08
PIGF	1.06445	6.24188	7.70159	1.66233e-09	6.26049e-08
LMBRD2	1.08325	5.38184	7.69412	1.70261e-09	6.40232e-08
PRKAR1A	1.02115	8.49515	7.68139	1.77359e-09	6.6386e-08
METTL18	1.19176	5.78857	7.67606	1.80415e-09	6.73426e-08
RECQL	1.22055	7.57781	7.67406	1.8158e-09	6.75521e-08
SCOC	1.02741	6.51502	7.65902	1.90559e-09	7.03572e-08
STX7	1.05544	6.00597	7.65029	1.95975e-09	7.21389e-08
C16orf52	1.04863	5.84516	7.64919	1.96665e-09	7.22839e-08
SAMD9	1.62338	6.08033	7.63911	2.03137e-09	7.38852e-08
OAS2	1.27374	6.41322	7.6261	2.11802e-09	7.64676e-08
SUV420H1	1.14926	6.78419	7.61837	2.1713e-09	7.80453e-08
RPA3OS	1.32998	4.92073	7.6143	2.19987e-09	7.88404e-08
LOC101930115	1.09365	6.18525	7.60873	2.23962e-09	7.96808e-08
CRIM1	1.14141	5.90949	7.59737	2.3229e-09	8.19284e-08
TCF7L2	1.06905	6.86595	7.5932	2.35429e-09	8.29156e-08
ARHGEF3	1.10569	8.67983	7.59261	2.35873e-09	8.29527e-08
MRPL19	1.02435	5.14989	7.58672	2.40385e-09	8.44178e-08
ASXL2	1.32215	6.98668	7.58255	2.43634e-09	8.49487e-08
ECHDC1	1.406	6.95048	7.55538	2.65883e-09	9.17896e-08
P2RY13	1.67483	6.24084	7.54759	2.72638e-09	9.37247e-08
RAB28	1.07103	5.53665	7.54352	2.76236e-09	9.46952e-08
NDUFA8	1.21525	6.95566	7.54126	2.78248e-09	9.52514e-08
TRMT13	1.47289	5.94817	7.53604	2.82964e-09	9.60543e-08
LBH	1.18623	7.52662	7.53374	2.8507e-09	9.62387e-08
ZNF559	1.67297	6.03371	7.48088	3.38013e-09	1.11344e-07
ATP10D	1.74295	5.78771	7.47542	3.4401e-09	1.12863e-07
TRG-AS1	1.51028	7.46138	7.47208	3.47741e-09	1.13934e-07
TMEM106B	1.08098	7.23697	7.46179	3.59475e-09	1.16839e-07
MARCH1	1.5612	6.93614	7.4511	3.72087e-09	1.19665e-07
RIN2	1.15829	6.28407	7.44795	3.75888e-09	1.2057e-07
LINC00998	1.12031	5.61358	7.43786	3.88331e-09	1.24398e-07
BRI3BP	1.22097	6.34896	7.43066	3.9746e-09	1.26824e-07
USO1	1.01712	7.05776	7.42564	4.03964e-09	1.28564e-07
ACADM	1.98284	6.7586	7.41008	4.2478e-09	1.33622e-07
ARL15	1.12331	5.94484	7.39429	4.47008e-09	1.39359e-07
ANKRD17	1.13496	7.24299	7.38262	4.6419e-09	1.43617e-07
ACN9	1.35544	5.44908	7.36891	4.85225e-09	1.48807e-07
SIRPB2	1.23838	6.36979	7.35403	5.09144e-09	1.5593e-07
SACS	1.17093	6.14458	7.34765	5.19746e-09	1.584e-07
METTL2A	1.00103	5.06197	7.32365	5.6173e-09	1.68464e-07
MKKS	1.08193	5.73755	7.31176	5.8376e-09	1.74003e-07
TAF4	1.14129	5.926	7.30462	5.97405e-09	1.77206e-07
SHPRH	1.27823	5.82657	7.30097	6.04511e-09	1.78663e-07
LNPEP	1.03665	7.85451	7.28555	6.35479e-09	1.86016e-07
PTGER2	1.30988	7.4781	7.27601	6.55421e-09	1.89835e-07
HSD17B4	1.55696	6.06832	7.27576	6.55947e-09	1.89835e-07
KCTD12	1.45117	9.1493	7.25903	6.92488e-09	1.9866e-07
CBX1	1.28586	7.31472	7.24615	7.22024e-09	2.06406e-07
TMX3	1.15949	6.27505	7.22495	7.73395e-09	2.19042e-07
SMARCAL1	1.02785	6.01717	7.2152	7.98235e-09	2.23744e-07
PBRM1	1.03956	6.48937	7.21033	8.10953e-09	2.26064e-07
C17orf62	1.63299	6.41286	7.20585	8.22835e-09	2.28802e-07
TRAPPC8	1.00415	8.42823	7.20451	8.26406e-09	2.29319e-07
CHST15	1.02143	7.22887	7.19894	8.41502e-09	2.31883e-07
GVINP1	1.46517	6.29317	7.19615	8.49151e-09	2.3372e-07
GALK2	1.21964	5.3822	7.19261	8.58941e-09	2.35626e-07
PSMB8-AS1	1.30507	7.45006	7.1868	8.75303e-09	2.38242e-07
AJ420595	1.2481	5.27884	7.18049	8.93411e-09	2.429e-07
RPAP3	1.01804	5.76882	7.17776	9.01374e-09	2.44793e-07
PPP1R21	1.06502	6.7714	7.17061	9.22553e-09	2.49712e-07
MPLKIP	1.18384	7.29317	7.14491	1.00286e-08	2.67306e-07
CRYZ	1.57988	5.9886	7.1323	1.04479e-08	2.76972e-07
MDM1	1.12864	5.51894	7.11787	1.09497e-08	2.86545e-07
TIMMDC1	1.26026	6.94325	7.11255	1.11407e-08	2.89681e-07
PRDX4	1.01214	6.27422	7.09218	1.19033e-08	3.06575e-07
COMMD8	1.25613	8.45098	7.08171	1.23155e-08	3.14212e-07
LYST	1.01343	6.84579	7.07042	1.27764e-08	3.2428e-07
VPS36	1.13076	6.46417	7.06466	1.30179e-08	3.28025e-07
HEATR5B	1.03619	5.81178	7.05948	1.32392e-08	3.32631e-07
DSERG1	1.31642	7.40307	7.05467	1.34481e-08	3.35749e-07
DPYD	1.27725	7.40397	7.0462	1.38242e-08	3.43385e-07
MITD1	1.35776	7.13524	7.01737	1.51842e-08	3.70392e-07
EEA1	1.36708	4.95042	7.00574	1.57704e-08	3.80512e-07
SRBD1	1.04622	5.92685	6.98121	1.70825e-08	4.07346e-07
UBASH3A	1.04382	5.81384	6.95904	1.83624e-08	4.28258e-07
THEMIS	2.0042	6.48952	6.93522	1.98452e-08	4.57503e-07
MYOF	1.3177	5.77958	6.92025	2.08387e-08	4.73364e-07
JAK2	1.25066	6.39295	6.91588	2.11375e-08	4.78817e-07
RP11-747H7.3	1.41261	5.91966	6.90837	2.16616e-08	4.88425e-07
SLC35A1	1.6986	7.786	6.90265	2.20702e-08	4.9718e-07
ZNF302	1.0801	6.20457	6.85177	2.60573e-08	5.71205e-07
RPA2	1.02759	7.47879	6.84702	2.64642e-08	5.7805e-07
STK39	1.27405	6.57217	6.84506	2.66341e-08	5.81241e-07
SMIM14	1.36297	6.1866	6.82697	2.82554e-08	6.11166e-07
PCNA	1.22136	7.05594	6.79138	3.174e-08	6.75187e-07
CMTR2	1.18923	6.2567	6.76304	3.482e-08	7.30533e-07
mir-223	1.21198	6.6621	6.755	3.57479e-08	7.47697e-07
CARD8	1.0112	6.89566	6.7457	3.6851e-08	7.6787e-07
HIATL1	1.02903	6.64617	6.73037	3.87466e-08	7.99492e-07
PDHX	1.07966	6.1919	6.6918	4.39568e-08	8.88661e-07
LOC101930059	1.31167	6.46926	6.67284	4.67717e-08	9.37814e-07
AGPAT5	1.02575	6.37036	6.66463	4.80459e-08	9.59425e-07
ZSCAN29	1.0053	6.45062	6.63713	5.25708e-08	1.02467e-06
RB1	1.14146	6.98986	6.60834	5.77693e-08	1.11181e-06
IKZF2	1.00677	5.25469	6.60639	5.81397e-08	1.11721e-06
ESYT1	1.19727	8.04882	6.5806	6.32644e-08	1.20523e-06
TEP1	1.09001	6.53601	6.57301	6.48569e-08	1.23122e-06
KRCC1	1.49852	6.65959	6.55946	6.78034e-08	1.27973e-06
UGDH	1.06278	6.05517	6.54444	7.12228e-08	1.32282e-06
LRRK2	1.76085	6.88078	6.52607	7.56434e-08	1.39854e-06
SMCO4	1.42105	7.05082	6.51542	7.83314e-08	1.44061e-06
GCA	1.56707	8.38107	6.48681	8.60356e-08	1.56465e-06
ZCCHC7	1.02305	7.28346	6.43082	1.03376e-07	1.82874e-06
TRAPPC12	1.15985	6.24343	6.40434	1.12759e-07	1.9672e-06
CWC27	1.12973	6.34966	6.38267	1.21069e-07	2.09277e-06
TRAT1	1.08374	7.94874	6.33254	1.4272e-07	2.41384e-06
BTN3A3	1.29761	8.57252	6.31227	1.5254e-07	2.55718e-06
TBCK	1.55511	6.06048	6.31133	1.53008e-07	2.56327e-06
C2orf74	1.2105	5.43121	6.30936	1.54003e-07	2.57641e-06
SLC46A3	1.11683	6.96641	6.30788	1.5475e-07	2.5836e-06
CCR5	1.03459	7.85905	6.29253	1.62748e-07	2.69215e-06
IPCEF1	1.22481	7.3332	6.26039	1.80863e-07	2.93927e-06
TRIM22	1.10588	9.81437	6.251	1.86526e-07	3.01476e-06
FAM198B	1.73507	7.13781	6.24533	1.90027e-07	3.04872e-06
BANF1	1.01965	8.14764	6.22779	2.01291e-07	3.19684e-06
DYNLL1	1.32788	9.13742	6.19946	2.20918e-07	3.45912e-06
DNAJC13	1.14737	6.06789	6.19487	2.2427e-07	3.50039e-06
PLGLB1	1.07874	4.49494	6.18476	2.31844e-07	3.60646e-06
XAF1	1.39943	7.3257	6.14162	2.67129e-07	4.06043e-06
ZNF514	1.06054	5.85468	6.12559	2.81566e-07	4.23249e-06
PHKB	1.11393	6.54036	6.11	2.96353e-07	4.40468e-06
PYHIN1	1.28124	7.11716	6.10955	2.96792e-07	4.40468e-06
MSANTD2	1.11536	6.2147	6.09333	3.1303e-07	4.60077e-06
BTN3A2	1.38916	8.81892	5.99597	4.30939e-07	6.0223e-06
BLNK	1.44679	6.04176	5.98008	4.54013e-07	6.29081e-06
EAF2	1.06585	5.58267	5.97029	4.68848e-07	6.48166e-06
IFI35	1.0607	6.7702	5.94376	5.11506e-07	6.91495e-06
HDHD2	1.70746	7.04791	5.93628	5.24222e-07	7.05563e-06
PRF1	1.43283	9.50667	5.93496	5.26498e-07	7.07847e-06
LCLAT1	1.09081	6.352	5.89133	6.07556e-07	7.97524e-06
IGSF6	1.17034	6.59852	5.84568	7.05697e-07	9.08301e-06
FAM65B	1.44782	8.74165	5.84533	7.06512e-07	9.08871e-06
NFE2	1.09592	5.89793	5.80103	8.17013e-07	1.02935e-05
CD1D	1.01449	6.94922	5.75491	9.50375e-07	1.17835e-05
AF520793	1.37687	7.27696	5.74004	9.97844e-07	1.22621e-05
SAMD3	1.16941	6.69119	5.69722	1.14812e-06	1.38102e-05
SLC40A1	1.19386	7.20134	5.69484	1.15711e-06	1.3891e-05
EMG1	1.13137	7.08152	5.62413	1.45856e-06	1.68003e-05
PWAR6	1.30636	6.21504	5.60396	1.55808e-06	1.77868e-05
C11orf73	1.11972	6.98799	5.5801	1.68452e-06	1.90793e-05
SAMHD1	1.2435	9.46402	5.5665	1.76116e-06	1.97641e-05
LOC100131541	1.08139	6.9829	5.55794	1.81111e-06	2.02618e-05
STEAP4	1.25264	5.68489	5.4976	2.20586e-06	2.38988e-05
HCK	1.09303	8.95512	5.49391	2.23263e-06	2.41781e-05
MSRB1	1.21409	8.11624	5.46577	2.44745e-06	2.61797e-05
LOC102724356	1.21277	7.91806	5.42055	2.83657e-06	2.97688e-05
TMEM251	1.3123	5.81436	5.36803	3.36618e-06	3.43247e-05
MEGF9	1.48279	6.83359	5.31784	3.9638e-06	3.94315e-05
PLAC8	1.01679	9.93827	5.28403	4.42443e-06	4.34479e-05
CSF1R	1.16645	7.96253	5.25223	4.90623e-06	4.73316e-05
CD27	1.03019	8.15864	5.23665	5.16083e-06	4.94671e-05
PSMB9	1.0171	9.13875	5.22038	5.4407e-06	5.17841e-05
MS4A7	1.01704	8.34506	5.21031	5.62152e-06	5.33137e-05
FGL2	1.71115	9.61775	5.09621	8.13521e-06	7.25961e-05
RAB27B	1.01707	5.95969	5.06281	9.0626e-06	7.95076e-05
MAD1L1	1.03557	6.74752	5.01938	1.04263e-05	8.92294e-05
ATP2B4	1.05778	7.53148	4.96834	1.22902e-05	0.000102595
RNASE2	1.00253	8.39707	4.91579	1.45533e-05	0.000118216
MPEG1	1.04984	10.0867	4.86399	1.71857e-05	0.000136381
MX2	1.0076	7.63281	4.85631	1.76144e-05	0.000139105
CLEC12A	1.07506	6.59548	4.73625	2.58557e-05	0.000193537
TNFRSF17	1.06765	4.4671	4.62013	3.74007e-05	0.000264052
MX1	1.15519	8.17634	4.40297	7.41329e-05	0.000476079
CYP1B1	1.38085	6.97742	4.31526	9.74765e-05	0.000601495
GUSBP3	1.16247	6.98187	4.22444	0.000129202	0.000770047
DUSP6	1.13986	8.74556	4.17901	0.000148653	0.000868398
A2M-AS1	1.10377	6.9285	4.16665	0.000154423	0.000897174
NEXN	1.01854	5.50589	4.16396	0.000155707	0.000902877
FCRL3	1.08625	6.81308	4.04259	0.000225834	0.0012368
GUSBP9	1.1961	7.48307	4.03519	0.000230983	0.0012588
SMA5	1.09228	6.09148	3.72917	0.000579317	0.002756
HSPA1A	1.4721	7.64939	3.53064	0.00103609	0.00447897
HSPA1B	1.4721	7.64939	3.53064	0.00103609	0.00447897
KLRC1	1.15827	7.2252	3.47203	0.00122699	0.00515913
KLRC2	1.15827	7.2252	3.47203	0.00122699	0.00515913

## Sheet: Sheet4
	COMMON DEGs of 3 MS stages
up-regulated	down-regulated	others
Gene symble	Gene symble	Gene symble
DUSP7	RGPD1	A2M-AS1
TP53	RGPD2	LOC102724356
CCR2	MAP3K8	AF520793
TNFSF10	SKIL	DSERG1
CALHM2	CXCL8
GIMAP6	GABARAPL3
CYSLTR1	CLK1
NDUFAF1	GABARAPL1
TNFAIP8L2	G0S2
COA3	RGPD3
TICAM2	RGPD4
CDK2AP2	RGPD5
TRIM34	RGPD6
TRIM6-TRIM34	RGPD8
TLR8	C9orf38
PCMT1	CCNL1
ST8SIA4	NR4A2
NLRC4	ERMN
RAB10	OSM
GIMAP8	GRASP
DYNC1I2	NAMPT
MAT2B	HBEGF
IRF2	BTG3
TRIM5	SIK1
P2RY13	SCML1
OAS1	HAUS3
COPB2	ZNF331
GIMAP4	JMJD6
PTPN6	DBF4
MNDA	ZBTB21
GIMAP1	CD83
C14orf119	AREG
MRPL51	GZF1
ZMYM6NB	HIF1A
VPS35	TP53INP2
PPIL1	IDI1
ATP6V1C1	IFRD1
IDH1	RP11-469M7.1
PSMB8-AS1	PLK3
ZNF146	VEGFA
NUDCD1	PFKFB3
DCP1B	ETV3
OSBPL11	FOSL2
BANF1	LINC-PINT
AHSA1	SLC2A3
SLC46A2	PIGA
GIMAP1-GIMAP5	IRS2
GIMAP5	C12orf79
GAPT	PTS
PDHB	SBDS
SMIM14	SBDSP1
TIMMDC1	RGS1
DCK	TNFAIP3
ECHDC1	SLC2A14
NAGK	YPEL5
MEF2C	DUSP2
MKKS	NXT1
SKA2	LINC00936
CX3CR1	PDE4B
GIN1	SLC7A5
PTGER2	AK057657
MRPS28	EREG
CD1D	DDIT4
PRKAR1A	PMAIP1
P2RY14	RANBP2
MTIF3	CCL3
FUNDC1	CCL3L1
RNF20	CCL3L3
HDHD1	MIR6732
TXNDC9	ZC3H12A
PARP1	DOCK4
SMCO4	CSRNP1
PVRIG	ZBTB43
COMMD8	MAFF
NIF3L1	ZFP36
DDX60	PHACTR1
HSD17B4	JUN
KCTD12	SMAD7
DDX58	JOSD1
TLR7	PLAUR
LOC100505812	BRE-AS1
LACTB2	RIT1
LRIF1	SYAP1
NDUFA8	SGK1
SUCLA2	IER3
CETN3	NR4A3
FAM198B	STARD4
BRI3BP	RP1-151F17.2
MRPS31	ATF3
IFI16	RP6-99M1.2
OIP5-AS1	DUSP10
SLC35A5	CDKN1A
ICAM2	RGCC
C6orf211	SNX9
MARCH1	MXD1
ACADM	RIPK2
CSF1R	RASGEF1B
DPYD	FOSB
GALNT7	NFIL3
TMEM69	SAMSN1
ATF1	MIR22
TDRD7	MIR22HG
DTX3L	THBD
HIATL1	BHLHE40
LRRN3	DDIT3
CBX1	WHAMM
SIRPB2	TRIB1
UGDH	TIPARP
RB1	ELL2
RPA2	GPR183
CTBP2	ZBTB10
LBH	RP11-489E7.4
MSRB1	HCAR3
CASP8AP2	CTA-29F11.1
GOLPH3L	DUSP4
ATG4C	CREM
C17orf62	THBS1
BLNK	SC5D
OAS2	PTGS2
GIMAP7	GADD45B
TCL1A	CXCL2
LINC00998	EAF1
HIBCH	NRIP3
STX7	JAG1
ETNK1	NLRP3
LINC00324	ACSL1
TLR5	PPIF
RACGAP1	NFKBIA
METTL18	BCL2A1
COQ5	B3GNT5
DENND2D	FOS
GPR171	HIST1H1C
ST6GAL1	C15orf48
MPLKIP	KBTBD8
SAMHD1	FCAR
FPGT	TUBB2A
HDHD2	CCL20
C2orf74	ADM
ARFIP1	PLK2
TAF4	PHLDA1
EEA1	OLR1
C11orf73	IL1B
SGK223	IFNG
MITD1	CXCL3
HCK	PPP1R15A
ZNF260	GPR84
ACTL6A	SERPINB2
MEGF9	EGR3
IGSF6	IL1R2
GCA
SLC35A1
MINPP1
THEMIS
MSH2
FGL2
CARD6
KRCC1
ESYT1
GVINP1
RPA3OS
PHF6
SAMD9L
ACN9
TRAPPC12
SLC35B3
DUSP6
XAF1
NEK7
OMA1
EMG1
TNFRSF17
SAMD9
PRKACB
DNAJC13
LCLAT1
TMEM251
ASF1A
TBCK
ZNF559
PRF1
DYNLL1
MAD1L1
BTN3A3
BTN3A2
CYP1B1
FAM65B
ATP10D
GBP1
CRYZ
LOC283357
LRRK2
FCRL3
CLEC12A
MYOF
HSPA1A
HSPA1B

## Sheet: Sheet5
Shared up-regulated DEGs of each two MS stages								Unique up-regulated DEGs of different MS stage
RR&PP	RR&SP	PP&SP						RR only	PP only	SP only
Gene symble	Gene symble	Gene symble						Gene symble	Gene symble	Gene symble
DUSP7	DUSP7	TNFAIP8L2						CPSF2	SEC23IP	MRPS14
TP53	TP53	CCR2						NME6	PREB	SMC1A
CCR2	MRPL18	GIMAP8						TRIM4	TTI1	EMC2
TNFSF10	CCR2	TLR7						PSMA5	SH2D3C	TRIM56
CALHM2	TNFSF10	DUSP7						COPS5	APAF1	NHLRC3
GIMAP6	CALHM2	NLRC4						LOC101928429	SHQ1	SLFN5
CYSLTR1	GIMAP6	ST8SIA4						TLR10	C5orf51	MRPL27
NDUFAF1	CYSLTR1	CALHM2						ORMDL2	RPA4	PIN4
TNFAIP8L2	NDUFAF1	C14orf119						ORAI3	FAM217B	GTF2H5
COA3	TNFAIP8L2	CX3CR1						LMO2	C9orf69	BFAR
TICAM2	COA3	RSBN1L						SCD5	LFNG	LOC101929886
CDK2AP2	TICAM2	COPB2						ATP6V1A	VPS72	TCF7L2
TRIM34	CDK2AP2	GIMAP4						PPP2CB	UNG	MRPL19
TRIM6-TRIM34	CHCHD1	ZC3H13						RNASE6	ZNF623	LNPEP
TLR8	TRIM34	CETN3						MRPS18B	PAQR8	TRAPPC8
PCMT1	TRIM6-TRIM34	TRIM5						VPREB3	NACC2	PPP1R21
ST8SIA4	TLR8	RNASEL						SNAPIN	ISOC1	LYST
NLRC4	PCMT1	TNFSF10						SLC25A11	RP11-4O1.2	HEATR5B
RAB10	ST8SIA4	CD180						PROSC	CLCN3	JAK2
GIMAP8	METTL7A	ATG4C						RNF5P1	SNX1	ZNF302
DYNC1I2	NLRC4	RP11-732A19.1						CASP1	ATG16L2	PDHX
MAT2B	RAB10	ACTL6A						LPAR6	ANKRD27	AGPAT5
IRF2	GIMAP8	LOC100505812						MYC	MRFAP1L1	ZSCAN29
SAC3D1	DYNC1I2	NDUFAF1						TRIM14	SGMS2	IKZF2
JKAMP	NDUFB3	TP53						PPID	TIGIT	ZCCHC7
TRIM5	MAT2B	FAM114A2						YWHAB	CTD-2292M16.8	PLGLB1
P2RY13	IRF2	GIMAP6						KIAA0930	ZNF217	ZNF514
OAS1	TRIM5	LOC100996412						CEBPA	ZNF140	LOC100131541
COPB2	P2RY13	TXNDC9						TFCP2	TRIT1	MS4A7
GIMAP4	OAS1	CDK2AP2						GNB4	BET1	GUSBP3
PTPN6	COPB2	CRYBG3						KCNE3	UFSP2	GUSBP9
MNDA	GIMAP4	GIMAP1-GIMAP5						TCEAL8	SLAMF7	SMA5
GIMAP1	PTPN6	GIMAP5						MEFV	ATL3	KLRC1
C14orf119	MNDA	TLR8						HVCN1	SLC25A20	KLRC2
MRPL51	GIMAP1	DCP1B						C7orf55	ZNF678
ZMYM6NB	C14orf119	HIBCH						MS4A6A	CRNKL1
VPS35	MRPL51	TRANK1						ABRACL	BAZ2B
PPIL1	ZMYM6NB	FPGT						PRDX3	PTGDR
ATP6V1C1	VPS35	MED11						IGKV2-28	EOMES
IDH1	PPIL1	LACTB2						IGKV2D-28	GLTSCR1L
PSMB8-AS1	ATP6V1C1	SLC38A9						METTL2B	SLAMF6
ZNF146	CISD1	SPOP						C14orf142	IL6R
NUDCD1	IDH1	LOC283357						ARMC10	ZC3H4
DCP1B	PSMB8-AS1	AL833181						CSK	LOC401317
OSBPL11	ZNF146	CTR9						NBR1	CACNA2D3
BANF1	NUDCD1	SAMD9L						CORO1A	VNN1
AHSA1	DCP1B	NIF3L1						FES	TARP
SLC46A2	OSBPL11	GIN1						CCT5	TRGC2
GIMAP1-GIMAP5	BANF1	ETNK1						FUCA1	TRGV9
GIMAP5	AHSA1	C11orf48						CARD16	MCTP1
GAPT	SLC46A2	LOC102288414						ARPC5	VCL
PDHB	GIMAP1-GIMAP5	TICAM2						CECR1	CD24
SMIM14	GIMAP5	MRPS28						GRN	MYBL1
TIMMDC1	GAPT	LCORL						C1orf162	PROS1
RNF14	PDHB	RACGAP1						PRDX1	AKR1C3
GLB1	SMIM14	LINC00324						LRRC25	GUCY1B3
TMPPE	TIMMDC1	PREPL						S100A11	CXCR2
DCK	DCK	VPS35						MRPL15	ELOVL7
ECHDC1	ECHDC1	RAB10						SLC25A40	LCN2
NAGK	NAGK	WDR7						CTSC	OLFM4
MEF2C	MEF2C	GTF2E1						DKFZp667J0810
MKKS	MKKS	RP11-5C23.1						IGLV1-36
SKA2	SKA2	IFI16						PYCARD
CX3CR1	CX3CR1	MRPS31						RECK
GIN1	GIN1	PTPN6						NMI
PTGER2	PTGER2	DYNC1I2						HDAC1
MRPS28	MRPS28	TRIM34						COLCA1
ARHGAP30	CD1D	TRIM6-TRIM34						OPHN1
CD1D	PRKAR1A	DDX60						HAUS1
PRKAR1A	P2RY14	MOSPD2						C21orf59
P2RY14	MTIF3	IRF2						C4orf27
MTIF3	FUNDC1	PPIL1						IGLV1-50
FUNDC1	RNF20	DDX58						CREBL2
RMI1	HDHD1	SYNRG						LILRA1
RNF20	ARL11	ZNF260						TCTN2
HDHD1	TXNDC9	OAS1						MRPL13
TXNDC9	PARP1	NUDCD1						COMMD10
PARP1	METTL2A	NAGK						M6PR
SMCO4	SMCO4	FAM98B						PCTP
PVRIG	PVRIG	GIMAP7						SELPLG
COMMD8	COMMD8	SP4						OPN3
NIF3L1	NIF3L1	IDH1						UCP2
DDX60	DDX60	PVRIG						FLI1
HSD17B4	ZDHHC16	PCMT1						C7orf60
KCTD12	HSD17B4	MGME1						IGHV3-23
DDX58	SPTSSA	COA3						FCRLA
TLR7	KCTD12	SGK223						ZNF528
LOC100505812	SCOC	AHSA1						IGKV1-37
LACTB2	DDX58	CYSLTR1						IGKV1D-37
MGC70870	MRPS18C	SUCLA2						ATP6V1B2
LRIF1	TLR7	TMEM69						CD14
NDUFA8	LOC100505812	MAT2B						CYFIP1
SUCLA2	LACTB2	HERC4						LRRC75A-AS1
CETN3	LRIF1	CNOT6						SNORD49A
PCYOX1	NDUFA8	PEX11B						SNORD49B
FAM198B	SUCLA2	HMG20A						SNORD65
BRI3BP	CETN3	LOC101927204						TNFSF13B
MRPS31	FAM198B	GALNT7						LOC101928288
IFI16	MPEG1	COG6						PID1
OIP5-AS1	BRI3BP	ATP6V1C1						IGKV1-17
SLC35A5	MRPS31	DTX3L						UBE2L6
ICAM2	IFI16	GOLPH3L						MS4A4A
C6orf211	OIP5-AS1	IPO8						C2orf76
MARCH1	SLC35A5	SLC46A2						AIM2
GBE1	ICAM2	FUNDC1						ANKRD20A8P
ACADM	C6orf211	TSNAX						abParts
CSF1R	MARCH1	OSBPL11						IGKV4-1
DPYD	ACADM	RP11-395B7.7						LOC101928620
GALNT7	CSF1R	ZNF146						POU2AF1
TMEM69	SRBD1	FASTKD1						IGKC
ATF1	DPYD	MINA						FIG4
TDRD7	GALNT7	MTIF3						IGK
DTX3L	POT1	LOC100505549						IGHG2
HIATL1	TMEM69	SLC35B3						CYBRD1
LRRN3	ATF1	C6orf211						ANXA4
CBX1	TDRD7	ARFIP1						IGHA2
SIRPB2	DTX3L	ICAM2						TLR4
UGDH	HIATL1	NEK7						TSPAN13
RB1	LRRN3	GAPT						DPYSL2
RPA2	CBX1	GBP3						TBC1D9
CTBP2	SIRPB2	CARD6						POP5
LBH	PRDX4	CTC-444N24.11						ALDH1A1
MSRB1	UGDH	TRAPPC6B						IQGAP1
CASP8AP2	RB1	RIN2						MIR8071-1
GOLPH3L	EAF2	CPOX						MIR8071-2
ATG4C	RPA2	AMMECR1						IGLC1
C17orf62	CTBP2	GTF2H1						IGJ
BLNK	LBH	MCM3						IGLV1-44
RCBTB2	MSRB1	MRPL51						CYAT1
OAS2	RPAP3	LOC101930324						HPSE
GIMAP7	CASP8AP2	CASP8AP2						IL32
TCL1A	GOLPH3L	PTER						EPSTI1
LINC00998	ATG4C	BRI3BP						CMPK2
HIBCH	C17orf62	PARP1						RSAD2
STX7	BLNK	DENND2D						TMEM176B
ETNK1	OAS2	ZMYM6NB
LINC00324	GIMAP7	RNF20
TLR5	TCL1A	NUP43
SLC27A3	LINC00998	SAMD9
RACGAP1	HIBCH	CLOCK
METTL18	STX7	TLR5
COQ5	ETNK1	KLHL8
DENND2D	LINC00324	GBP1
GPR171	TLR5	SKA2
ST6GAL1	RACGAP1	PIGF
MPLKIP	METTL18	C11orf54
SAMHD1	COQ5	DNAJC24
FPGT	DENND2D	TRG-AS1
HDHD2	GPR171	CBR4
C2orf74	ST6GAL1	GPR171
ARFIP1	MPLKIP	ATF1
TAF4	SAMHD1	AGL
EEA1	FPGT	P2RY14
C11orf73	HDHD2	DMXL1
SGK223	C2orf74	SLC35A5
MITD1	ARFIP1	SACS
HCK	TAF4	TDRD7
ZNF260	EEA1	PDHB
ACTL6A	C11orf73	RNF111
FRAT2	SGK223	HLTF
MEGF9	MITD1	ASF1A
IGSF6	HCK	C9orf41
GCA	ZNF260	OAS2
SLC35A1	ACTL6A	GIMAP1
MINPP1	MEGF9	PHF6
THEMIS	IGSF6	CTBP2
MSH2	GCA	SOS1
FGL2	SLC35A1	LRIF1
CARD6	MINPP1	COA4
KRCC1	THEMIS	OMA1
ESYT1	MSH2	CRIM1
GVINP1	FGL2	CREB1
RPA3OS	CARD6	PRKAR1A
PHF6	KRCC1	ATP11C
SAMD9L	ESYT1	METTL18
ACN9	GVINP1	NOC3L
TRAPPC12	RPA3OS	ST6GAL1
SLC35B3	PHF6	PRKACB
DUSP6	SAMD9L	TRPS1
XAF1	ACN9	XPO1
AMICA1	TRAPPC12	UBASH3A
NEK7	SLC35B3	NNT-AS1
OMA1	DUSP6	LYRM7
EMG1	XAF1	OXR1
TNFRSF17	PLAC8	ARL15
SAMD9	NEK7	MINPP1
PRKACB	OMA1	ASXL2
DNAJC13	PSMB9	SUV420H1
LCLAT1	EMG1	STX7
TMEM251	TRIM22	RAB28
ASF1A	TNFRSF17	P2RY13
TBCK	SAMD9	DDX60L
ZNF559	PRKACB	TCL1A
WBP1L	DNAJC13	DCK
PRF1	LCLAT1	GOLGA5
DYNLL1	CD27	ZNF559
MAD1L1	TMEM251	FGD4
BTN3A3	ASF1A	MNDA
BTN3A2	TBCK	TMEM87B
CYP1B1	ZNF559	TMEM260
FAM65B	PRF1	COQ5
ATP10D	STAT1	LMBRD2
RTN1	RNASE2	LINC00998
GBP1	DYNLL1	TMX3
CRYZ	MAD1L1	PHF14
LOC283357	BTN3A3	MDM1
LRRK2	IFI35	CMTR2
FCRL3	BTN3A2	C16orf52
CLEC12A	CYP1B1	MEF2C
MYOF	FAM65B	RPA3OS
IFIT1	ATP10D	USO1
HSPA1A	GBP1	LBH
HSPA1B	CRYZ	LOC101930115
	MX2	C17orf62
	LOC283357	PYHIN1
	LRRK2	VPS36
	FCRL3	SMARCAL1
	CLEC12A	TMEM106B
	MYOF	GALK2
	MX1	MIB1
	HSPA1A	OIP5-AS1
	HSPA1B	HDHD1
		RECQL
		SLC16A7
		MKKS
		RP11-747H7.3
		EDEM3
		SHPRH
		ARHGEF3
		TIMMDC1
		CHST15
		LOC284837
		ANKRD17
		TAF4
		STK39
		NDUFA8
		HIATL1
		HSD17B4
		PBRM1
		DPYD
		RPA2
		RAB27B
		MARCH1
		SLC35A1
		MSH2
		PSMB8-AS1
		AJ420595
		CCR5
		ACADM
		mir-223
		CARD8
		ATP10D
		THEMIS
		NFE2
		PCNA
		PTGER2
		LRRN3
		TRMT13
		SMCO4
		LOC101930059
		KRCC1
		SIRPB2
		ESYT1
		MITD1
		GCA
		CBX1
		COMMD8
		EEA1
		GVINP1
		UGDH
		MSANTD2
		TRAPPC12
		ECHDC1
		MPLKIP
		ACN9
		SMIM14
		KCTD12
		CRYZ
		LCLAT1
		RB1
		BTN3A3
		BANF1
		DYNLL1
		XAF1
		ATP2B4
		TEP1
		DSERG1
		DNAJC13
		SLC46A3
		SLC40A1
		LRRK2
		FAM198B
		PRF1
		MSRB1
		IPCEF1
		CWC27
		HDHD2
		PHKB
		MYOF
		SAMD3
		TRAT1
		TBCK
		BLNK
		CD1D
		EMG1
		BTN3A2
		C2orf74
		FAM65B
		TMEM251
		STEAP4
		TNFRSF17
		SAMHD1
		FCRL3
		IGSF6
		MEGF9
		HCK
		CSF1R
		C11orf73
		AF520793
		CLEC12A
		MAD1L1
		LOC102724356
		NEXN
		PWAR6
		A2M-AS1
		FGL2
		DUSP6
		CYP1B1
		HSPA1A
		HSPA1B

## Sheet: Sheet6
Shared down-regulated DEGs of each two MS stages							Unique down-regulated DEGs of different MS stage
RR VS PP	RR VS SP	PP VS SP					RR only	PP only	SP only
Gene symble	Gene symble	Gene symble					Gene symble	Gene symble	Gene symble
RGPD1	RGPD1	SBDS					RP11-769O8.3	CXCR4	TGIF1
RGPD2	RGPD2	SBDSP1					RBM39	CCDC59	PLIN2
CTD-3222D19.5	MAP3K8	HAUS3					CTNNB1	LOC101928927
MIR6883	SKIL	CCNL1					GSPT1	SNHG15
PER1	CXCL8	NXT1					GOLGA4	SNORA9
NUPL1	GABARAPL3	HBEGF					TAF9B	ZNF394
MAP3K8	CLK1	MAFF					SAMD4B	DUSP1
SKIL	GABARAPL1	BTG3					SREK1	KLHL15
CXCL8	G0S2	DBF4					PRO2852	SELK
GABARAPL3	RGPD3	G0S2					TRAPPC10	MASTL
CLK1	RGPD4	TNFAIP3					PAPD7	PIK3IP1
GABARAPL1	RGPD5	GABARAPL3					SNRPA1	RAB20
G0S2	RGPD6	JUN					LONRF1	DNAJB1
PELI1	RGPD8	GABARAPL1					FUS	JUNB
RGPD3	C9orf38	PMAIP1					RP11-138A9.1	TNFRSF21
RGPD4	CCNL1	AREG					FAM133B	ICAM1
RGPD5	NR4A2	GZF1					FAM133DP	KLF4
RGPD6	ERMN	RIPK2					MED26	LGALS2
RGPD8	OSM	MOAP1					ATG16L1	PTX3
C9orf38	GRASP	CSRNP1					RPS16P5	PLAU
CCNL1	NAMPT	SIK1					SFPQ
NR4A2	HBEGF	PFKFB3					TNIK
ERMN	BTG3	CLK1					CHD2
OSM	SIK1	NR4A2					TSPYL2
GRASP	SCML1	DDIT4					AFF4
NAMPT	HAUS3	ZFP36					C8orf60
TFRC	ZNF331	PTS					RHOH
HBEGF	JMJD6	CD83					SLC26A6
BTG3	DBF4	NFIL3					TRA2A
SIK1	ZBTB21	JMJD6					SLC25A36
SCML1	CD83	SMAD7					AP3M2
HAUS3	AREG	PIGA					TBRG1
RP11-373D23.2	GZF1	SKIL					SPATA13
ZNF331	HIF1A	RP11-469M7.1					CXorf65
SLC19A2	TP53INP2	GRASP					AK026714
JMJD6	IDI1	RGS1					RP11-271C24.3
DBF4	IFRD1	OSM					C1orf52
ZBTB21	RP11-469M7.1	CTA-29F11.1					EML4
CD83	PLK3	TIPARP					PTBP2
AREG	VEGFA	JOSD1					CEP95
GZF1	PFKFB3	CXCL8					U2AF1
HIF1A	ETV3	C9orf38					SRSF4
TP53INP2	FOSL2	SLC2A3					RUNX1-IT1
IDI1	LINC-PINT	SLC2A14					MGC12488
IFRD1	SLC2A3	ZBTB10					ZFAND6
RP11-469M7.1	PIGA	PLAUR					SCAF4
PLK3	IRS2	SYAP1					FLT1
AX747826	C12orf79	IDI1					CCDC84
VEGFA	PTS	SCML1					IKZF5
ZNF791	SBDS	RGPD1					HBB
PFKFB3	SBDSP1	RGPD2					HBA1
ETV3	RGS1	RP11-489E7.4					HBA2
FOSL2	TNFAIP3	MIR22					RLF
LINC-PINT	SLC25A37	MIR22HG					FNIP1
SLC2A3	SLC2A14	PDE4B					ADNP2
PIGA	YPEL5	VEGFA					EBLN2
IRS2	DUSP2	NFKBIA					ASXL1
C12orf79	NXT1	ZNF331					USPL1
PTS	LINC00936	HIF1A					RP11-182L21.5
SBDS	PDE4B	RGPD3					MGEA5
SBDSP1	SLC7A5	RGPD4					SYTL3
RGS1	GADD45A	RGPD5					NPIPB11
TNFAIP3	AK057657	RGPD6					GOLGA8A
SLC2A14	EREG	RGPD8					BD495725
YPEL5	DDIT4	JUND					RRN3P2
DUSP2	PMAIP1	FOSL2					ZMYM2
NXT1	RANBP2	AK057657					LOC101060275
LINC00936	CCL3	IRS2					ZNF451
PDE4B	CCL3L1	SLC25A33					RSRC2
SLC7A5	CCL3L3	RIT1					MIR612
AK057657	MIR6732	BHLHE40					NEAT1
EREG	ZC3H12A	CDKN1A					RORA
DDIT4	DOCK4	GADD45B					LOC101929910
PMAIP1	CSRNP1	EREG					CHD1
RANBP2	ZBTB43	LINC-PINT					YES1
CCL3	MAFF	NAMPT					LOC613037
CCL3L1	ZFP36	TP53INP2					NPIPB4
CCL3L3	PHACTR1	SLC7A5					NPIPB5
MIR6732	JUN	NLRP3					SNORA28
ZC3H12A	SMAD7	ETV3					PRC1
DOCK4	JOSD1	YPEL5					NPIPB3
CSRNP1	PLAUR	IFRD1					RBM38
ZBTB43	BRE-AS1	STARD4					ARHGEF7
MAFF	RIT1	MIR6732					LOC727820
ZFP36	SYAP1	ZC3H12A					LOC145474
PHACTR1	SGK1	EAF1					NECAP1
JUN	IER3	IER3					SMURF1
SMAD7	NR4A3	PLK3					RAB12
JOSD1	STARD4	DDIT3					LOC100190986
PLAUR	RP1-151F17.2	WHAMM					REV3L
BRE-AS1	ATF3	ATF3					CCNT1
RIT1	RP6-99M1.2	NFKBIE					AK128734
SYAP1	DUSP10	CCNH					CDC42-IT1
SGK1	CDKN1A	THBD					JMJD1C
IER3	RGCC	SGK1					MAP3K2
NR4A3	SNX9	ZBTB21					CASS4
STARD4	MXD1	C12orf79					LOC102725188
RP1-151F17.2	RIPK2	TRIB1					NKTR
ATF3	RASGEF1B	OTUD1					LOC100505915
RP6-99M1.2	FOSB	BRE-AS1					AY940074
DUSP10	NFIL3	DOCK4					RNF125
CDKN1A	SAMSN1	ID1					CDK17
RGCC	MIR22	ARL4A					SRSF11
SNX9	MIR22HG	ZBTB43					ZBTB11
MXD1	THBD	DUSP2					LOC101927451
RIPK2	BHLHE40	NR4A3					ARNTL
RASGEF1B	DDIT3	DUSP10					LOC100130429
FOSB	WHAMM	SAMSN1					RICTOR
NFIL3	TRIB1	MAP3K8					LOC102725125
NFKB2	TIPARP	RASGEF1B					SPAG9
SAMSN1	ELL2	CREM					ITPKB
MIR22	GPR183	IER5					KLHL24
MIR22HG	ATG2A	RANBP2					SLC22A3
THBD	ZBTB10	PHACTR1					KRR1
BHLHE40	RP11-489E7.4	CCL3					PAPD4
DDIT3	HCAR3	CCL3L1					ATXN7
WHAMM	CTA-29F11.1	CCL3L3					RP11-403P17.4
TRIB1	DUSP4	FCAR					AP1G1
TIPARP	CREM	RGCC					LOC100506076
ELL2	THBS1	LINC00936					LOC100506123
GPR183	SC5D	ADM					CLK4
CTB-31O20.2	PTGS2	SNX9					NDEL1
ZBTB10	GADD45B	PPIF					ID2B
CD69	CXCL2	BCL2A1					PGF
RP11-489E7.4	EAF1	FOS					BTAF1
HCAR3	NRIP3	ELL2					SLC20A1
CTA-29F11.1	JAG1	FOSB					GOLGA8B
DUSP4	NLRP3	GPR183					LOC101930583
CREM	ACSL1	PPP1R15A					LOC729966
THBS1	PPIF	ERMN					PDE4C
HIST2H2AA3	NFKBIA	MXD1					TSC22D2
HIST2H2AA4	BCL2A1	RP6-99M1.2					EIF2AK3
SC5D	B3GNT5	SC5D					LINC01002
PTGS2	FOS	B3GNT5					LOC100132062
GADD45B	HIST1H1C	KBTBD8					LOC100133182
CXCL2	C15orf48	GAFA1					LOC100133331
EAF1	KBTBD8	JAG1					LOC729737
NRIP3	FCAR	NINJ1					USP34
JAG1	TUBB2A	DUSP4					CLC
NLRP3	CCL20	ACSL1					LINC01001
ACSL1	ADM	CXCL2					LOC101929819
PPIF	PLK2	SNORD3A					SMG1P1
NFKBIA	PHLDA1	SNORD3B-1					LOC101060521
BCL2A1	OLR1	SNORD3B-2					MIAT
B3GNT5	IL1B	SNORD3C					FAM160B1
MIR155	IFNG	SNORD3D					LOC101927166
MIR155HG	CXCL3	RAB33A					CCDC152
FOS	PPP1R15A	C15orf48					AF007147
HIST1H1C	GPR84	TUBB2A					C9orf64
C15orf48	SERPINB2	RP1-151F17.2					LOC101930306
KBTBD8	EGR3	NRIP3					LOC100127972
FCAR	IL1R2	CXCL16					LINC01000
TUBB2A		HCAR3					REL
CCL20		PLK2					DKFZP586I1420
ADM		IL1B					HAUS2
PLK2		SERPINB2					FBXW12
PHLDA1		THBS1					WDFY2
OLR1		TREM1					FAM161B
IL1B		MN1					LOC100289333
IFNG		GPR84					B4GALT1
CXCL3		CCL20					UACA
PPP1R15A		IFNG					ZNF160
GPR84		PHLDA1					UBXN2A
SERPINB2		HIST1H1C					THAP9-AS1
EGR3		CXCL3					FAM208B
IL1R2		EGR3					LOC284454
		OLR1					MIR23A
		PTGS2					MIR24-2
		IL1R2					ARID2
							ATP8B1
							U50535
							C5orf28
							SCARNA17
							CMBL
							NFKBIZ
							PRR11
							GPRASP1
							NLN
							FLJ38717
							BC044596
							DLGAP4
							SNORD89
							SERPINB9
							NR1D2
							ANKRD10-IT1
							PDE4D
							ANKRD36B
							DBT
							AX746823
							RP11-319G9.3
							JMY
							GPCPD1
							BC022892
							BC041025
							AK057978
							RP11-158G18.1
							HYMAI
							PSMD6-AS2
							CLTC-IT1
							RUFY2
							PPP1R16B
							ZNF721
							CDK13
							AC004951.6
							AX747182
							DNAJB14
							ZBTB20
							TMEM41B
							AK090844
							SESN2
							NFKBID
							C17orf104
							LOC440354
							HBD
							FAM46C
							PRPF38B
							RINT1
							AF090939
							AC068039.4
							ZNF292
							ZC3H12D
							LOC441259
							SMG1P5
							LOC100272216
							GABPB1-AS1
							LOC101060596
							LOC102723773
							SMG1P7
							DEFA1
							DEFA1B
							DEFA3
							A2M-AS1
							IL1A
							LOC399900
							ZNF611
							GOLGA6L4
							GOLGA6L5P
							GOLGA6L9
							LOC102724093
							AK055910
							NOTCH2NL
							UPP1
							AC092620.2
							MALAT1
							CPA3
							CXCL1
							FAM185A
							ZNF700
							RNA45S5
							MS4A3
							AK126278
							HBG1
							HBG2
							RP4-635E18.8
							ZFYVE16
							LOC102724356
							TAF15
							HNRNPU-AS1
							AF520793
							FTX
							LOC100131541
							PGAP1
							DSERG1
							MIR29B2
							MIR29C
							HBM
							ALAS2
							LTF
							HIST1H2BG
							HIST1H2BJ
							RP11-196G18.24
							HIST2H2BE
							GUSBP9
							EGR1

## Sheet: Sheet7
PP VS RR
			DEGs between PP-MS and RR-MS
up-regulated							down-regulated
Gene symble	logFC	AveExpr	t	P.Value	adj.P.Val		Gene symble	logFC	AveExpr	t	P.Value	adj.P.Val
TNIK	1.06225	6.52428	10.4421	1.48814e-12	3.63731e-08		IGHV3-23	-1.08907	6.66592	-7.48631	6.66553e-09	9.87388e-07
A2M-AS1	3.18309	5.93018	10.0912	3.81153e-12	3.7259e-08		SCD5	-1.6011	6.22134	-7.43082	7.88095e-09	1.07796e-06
LOC101930306	1.40385	6.54803	9.85728	7.1981e-12	3.7259e-08		COLCA1	-1.53127	9.65846	-7.31346	1.12418e-08	1.32938e-06
RP11-138A9.1	3.44295	7.68946	9.73544	1.00527e-11	3.7259e-08		MEFV	-1.4656	5.93226	-6.5915	1.02463e-07	6.24107e-06
RUFY2	1.79489	5.06275	9.71553	1.06184e-11	3.7259e-08		OPHN1	-1.46506	10.0242	-6.52772	1.24769e-07	7.1587e-06
TBRG1	1.10464	6.98584	9.69131	1.13509e-11	3.7259e-08		LRRC75A-AS1	-1.21307	7.62859	-6.30352	2.49726e-07	1.22234e-05
RALGAPA2	1.40105	6.10968	9.64986	1.27254e-11	3.7259e-08		SNORD49A	-1.21307	7.62859	-6.30352	2.49726e-07	1.22234e-05
NPIPB11	1.91036	6.77656	9.62263	1.37195e-11	3.7259e-08		SNORD49B	-1.21307	7.62859	-6.30352	2.49726e-07	1.22234e-05
AF520793	2.79002	6.4246	9.48481	2.01049e-11	4.48752e-08		SNORD65	-1.21307	7.62859	-6.30352	2.49726e-07	1.22234e-05
RP11-732A19.1	1.34636	4.5998	9.4341	2.31544e-11	4.48752e-08		LOC101928288	-1.31415	5.21927	-6.21233	3.31375e-07	1.50069e-05
GAPDHP62	1.25729	6.81448	9.40822	2.48882e-11	4.48752e-08		TCTN2	-1.0799	6.6004	-6.0381	5.69307e-07	2.26998e-05
PSMD6-AS2	2.20923	7.67752	9.36799	2.78488e-11	4.48752e-08		ZNF528	-1.02746	4.61311	-5.58009	2.36634e-06	6.78055e-05
LOC101060275	2.09803	7.62363	9.36668	2.79512e-11	4.48752e-08		LOC101928429	-1.07486	6.03586	-5.26479	6.29995e-06	0.000146651
SCAF4	1.62766	6.68489	9.34892	2.93758e-11	4.48752e-08		ANKRD20A8P	-1.0416	3.61455	-4.93543	1.74309e-05	0.000318021
CLC	3.60816	7.34998	9.19427	4.53579e-11	6.5214e-08		LGALS2	-1.2295	8.41381	-3.85823	0.00044422	0.00375957
FAM185A	1.74943	5.57588	9.09758	5.96045e-11	7.28427e-08
LOC102724356	2.67289	7.02588	9.04619	6.89518e-11	7.5847e-08
NSUN6	1.39805	6.36311	9.03403	7.13723e-11	7.5847e-08
KDM4C	1.1827	5.87724	8.88357	1.09567e-10	1.00895e-07
RAB11FIP3	1.08677	6.12998	8.87759	1.11454e-10	1.00895e-07
SND1-IT1	1.21339	6.42563	8.84152	1.23571e-10	1.07869e-07
MBNL2	1.41638	6.88939	8.75907	1.56543e-10	1.1957e-07
MCTP2	1.05947	5.67166	8.73542	1.67556e-10	1.23109e-07
LOC100272216	2.88177	7.16913	8.72435	1.72977e-10	1.23109e-07
KIAA0754	1.10031	5.58528	8.70037	1.85341e-10	1.23109e-07
LOC100506076	1.34731	5.52646	8.66428	2.05667e-10	1.28083e-07
LOC100506123	1.34731	5.52646	8.66428	2.05667e-10	1.28083e-07
AF007147	2.12591	7.35354	8.65769	2.09611e-10	1.28083e-07
CRIM1	1.67924	5.77709	8.63	2.27062e-10	1.30574e-07
DSERG1	2.55504	6.6919	8.59839	2.48788e-10	1.38202e-07
SLC26A6	1.29441	5.89702	8.56744	2.72112e-10	1.44846e-07
RPS6KA5	1.02024	6.97444	8.56682	2.72601e-10	1.44846e-07
RP11-319G9.3	1.8518	5.02485	8.55302	2.83719e-10	1.47546e-07
RPA4	1.18542	4.40666	8.54377	2.91438e-10	1.48403e-07
RP11-182L21.5	2.49299	6.10528	8.48257	3.48101e-10	1.69447e-07
HNRNPU-AS1	2.48706	6.2247	8.46418	3.67227e-10	1.69447e-07
AC092620.2	2.01848	5.49988	8.46408	3.67334e-10	1.69447e-07
MGC12488	1.45878	4.84772	8.46399	3.67429e-10	1.69447e-07
RP11-747H7.3	1.8424	5.91376	8.42524	4.11316e-10	1.86174e-07
CCDC84	1.09855	7.56548	8.40977	4.30282e-10	1.91217e-07
DENND1B	1.1893	6.43935	8.37599	4.74846e-10	2.03617e-07
RAB12	1.19176	6.95783	8.358	5.00471e-10	2.10906e-07
ARID2	1.39921	6.86052	8.31249	5.71704e-10	2.31513e-07
MAP3K8	1.17561	6.72845	8.30846	5.78498e-10	2.31513e-07
NOTCH2NL	1.88947	9.44721	8.29099	6.08867e-10	2.31513e-07
DLEU2L	1.22159	5.11811	8.28538	6.18952e-10	2.31513e-07
CBFA2T2	1.07429	6.25203	8.27137	6.44894e-10	2.31513e-07
LOC100631377	1.08972	5.67057	8.26981	6.47851e-10	2.31513e-07
LOC101928673	1.08972	5.67057	8.26981	6.47851e-10	2.31513e-07
RUNX1-IT1	1.85462	6.6631	8.25184	6.82917e-10	2.37925e-07
COCH	1.03862	6.81668	8.243	7.00866e-10	2.37925e-07
HCRP1	1.45189	6.32295	8.23066	7.26733e-10	2.43326e-07
MIAT	1.41537	6.85723	8.13532	9.6201e-10	3.00577e-07
RP11-271C24.3	2.56978	6.94104	8.10868	1.04065e-09	3.1402e-07
EBLN2	1.19643	6.46072	8.10435	1.05401e-09	3.14173e-07
C5orf28	1.53444	6.25886	7.98743	1.48943e-09	4.00051e-07
PWAR6	2.02318	5.71139	7.94359	1.69631e-09	4.38023e-07
MGEA5	1.1482	8.16749	7.9149	1.84717e-09	4.56046e-07
LOC101929886	1.20511	6.31011	7.90419	1.90692e-09	4.61475e-07
SLC20A1	1.14131	8.31271	7.89297	1.97161e-09	4.68949e-07
ZNF700	1.43726	5.97907	7.87812	2.06069e-09	4.83962e-07
C5orf56	1.01522	7.12129	7.84195	2.29505e-09	5.21467e-07
USP24	1.03202	6.91933	7.84062	2.30417e-09	5.21467e-07
HBB	4.49152	10.5509	7.79409	2.64713e-09	5.72576e-07
GOLGA4	1.27629	7.45969	7.79076	2.67352e-09	5.73212e-07
HBA1	4.33833	10.8775	7.77801	2.77733e-09	5.85203e-07
HBA2	4.33833	10.8775	7.77801	2.77733e-09	5.85203e-07
LOC727820	2.70125	8.32357	7.73017	3.20422e-09	6.47253e-07
MIR15A	1.03711	4.92446	7.69217	3.59027e-09	7.1929e-07
LUC7L3	1.17875	8.04554	7.68931	3.62113e-09	7.19575e-07
REV3L	1.02395	6.78023	7.67503	3.77945e-09	7.39018e-07
LOC101929910	1.91756	7.06651	7.63802	4.22312e-09	7.72724e-07
MIR612	2.40432	8.82115	7.63697	4.23636e-09	7.72724e-07
NEAT1	2.40432	8.82115	7.63697	4.23636e-09	7.72724e-07
N4BP2L2	1.22497	8.10765	7.621	4.44443e-09	7.92926e-07
RPS16P5	2.05263	7.37626	7.61842	4.47904e-09	7.93309e-07
GABPB1-AS1	1.46837	6.192	7.59663	4.78199e-09	8.40873e-07
AJ420595	1.90501	5.01544	7.58757	4.91391e-09	8.56721e-07
NPIPB3	1.69535	6.73055	7.58062	5.01768e-09	8.56721e-07
CDC42-IT1	1.68843	6.40529	7.57945	5.03537e-09	8.56721e-07
U50535	2.12419	8.46812	7.57791	5.05875e-09	8.56721e-07
LOC102725188	2.83785	8.97677	7.57007	5.1794e-09	8.6119e-07
CRIPT	1.04709	7.17084	7.56276	5.29459e-09	8.68526e-07
LCOR	1.00732	8.13159	7.55372	5.44052e-09	8.80644e-07
ZMYM2	1.08951	6.04914	7.54313	5.61685e-09	9.03204e-07
AHSA2	1.02291	6.61642	7.52799	5.87879e-09	9.19884e-07
CDC14A	1.12975	5.5008	7.52685	5.89895e-09	9.19884e-07
ZBTB20	1.53079	6.89402	7.5263	5.90875e-09	9.19884e-07
LINC00597	1.17667	4.47803	7.51769	6.064e-09	9.32178e-07
ZNF493	1.10228	6.3691	7.50965	6.21269e-09	9.49065e-07
RP11-158G18.1	2.75935	6.69982	7.48743	6.64313e-09	9.87388e-07
LOC613037	1.82756	6.90021	7.47393	6.91913e-09	1.00069e-06
NPIPB4	1.82756	6.90021	7.47393	6.91913e-09	1.00069e-06
NPIPB5	1.82756	6.90021	7.47393	6.91913e-09	1.00069e-06
PRPF38B	1.65984	8.05028	7.44408	7.57155e-09	1.07595e-06
RP5-1074L1.4	1.18339	5.08234	7.42654	7.98357e-09	1.08408e-06
HYMAI	1.37969	5.52687	7.424	8.045e-09	1.08639e-06
LOC100996412	2.26159	7.18799	7.41068	8.37554e-09	1.10514e-06
PRO2852	2.25695	7.2306	7.41041	8.38245e-09	1.10514e-06
AK025288	1.24583	5.25354	7.40552	8.50707e-09	1.10514e-06
RBM26	1.00863	6.32425	7.40511	8.51772e-09	1.10514e-06
RP11-769O8.3	1.58446	4.97479	7.40229	8.59079e-09	1.10514e-06
SRSF11	1.10196	8.61391	7.35843	9.80987e-09	1.20623e-06
SGK494	1.11655	5.11057	7.28981	1.2078e-08	1.41249e-06
DAPK1-IT1	1.46147	5.422	7.28188	1.23721e-08	1.42776e-06
USP34	1.22535	7.98375	7.28039	1.2428e-08	1.42776e-06
AC068039.4	1.4065	5.56454	7.2733	1.26984e-08	1.45035e-06
AKAP10	1.14054	6.71167	7.24347	1.39023e-08	1.5659e-06
BD495725	1.45776	6.03062	7.22736	1.46001e-08	1.61473e-06
ATXN7	1.23381	8.52135	7.16501	1.76495e-08	1.85145e-06
NAA25	1.00201	5.72399	7.15239	1.83409e-08	1.89152e-06
PTBP2	1.02739	5.63252	7.13405	1.93947e-08	1.97519e-06
HSPBAP1	1.18891	6.61523	7.11674	2.04457e-08	2.05652e-06
CEPT1	1.62268	6.19639	7.11386	2.06262e-08	2.06617e-06
DKFZP586I1420	1.00907	8.54673	7.10069	2.14715e-08	2.11649e-06
RP11-846E15.2	1.2492	6.99763	7.09314	2.19718e-08	2.13958e-06
LOC101930059	1.67092	6.35172	7.08587	2.24644e-08	2.17887e-06
ZNF451	1.00657	7.08488	7.07676	2.30976e-08	2.23143e-06
MYBL1	1.05773	7.55546	7.01968	2.7497e-08	2.5652e-06
LOC101060405	1.0566	7.17023	7.0175	2.76811e-08	2.57255e-06
RP4-635E18.8	1.06502	7.33954	7.01485	2.79062e-08	2.58365e-06
KANSL1L	1.23049	5.13108	6.98829	3.02673e-08	2.75017e-06
NKTR	1.75467	7.21372	6.97766	3.12684e-08	2.80979e-06
SLC38A9	1.05969	6.12393	6.96759	3.22467e-08	2.85229e-06
AKAP9	1.16157	6.61541	6.95692	3.33172e-08	2.898e-06
PAPD4	1.21559	7.74096	6.95448	3.35669e-08	2.90937e-06
RICTOR	1.12712	7.74536	6.93445	3.56904e-08	3.02028e-06
ASAP1-IT2	1.05767	5.04434	6.92469	3.67736e-08	3.07815e-06
TAF15	1.56425	6.68029	6.91464	3.79238e-08	3.1519e-06
RP11-97C16.1	1.16756	5.40592	6.91172	3.82655e-08	3.15975e-06
GDAP2	1.4729	6.87319	6.8889	4.10374e-08	3.32131e-06
AK096592	1.03962	7.05334	6.86893	4.36307e-08	3.46241e-06
NUPL1	1.28301	6.40958	6.85929	4.49407e-08	3.48711e-06
ANKRD36B	2.33143	6.91647	6.83448	4.8496e-08	3.69265e-06
ZCCHC7	1.13236	7.2348	6.82709	4.96089e-08	3.74904e-06
OTUD6B	1.06803	6.71636	6.82303	5.02317e-08	3.74904e-06
FAM161B	1.36972	8.26546	6.81877	5.08938e-08	3.78099e-06
OGT	1.03348	8.30728	6.80233	5.35294e-08	3.92903e-06
SLC5A3	1.21947	7.08749	6.79627	5.4537e-08	3.991e-06
PKN2	1.19606	6.5736	6.74538	6.37733e-08	4.46721e-06
LOC100131564	1.14782	7.71331	6.74532	6.3786e-08	4.46721e-06
HBD	2.40554	6.31386	6.72112	6.87172e-08	4.71794e-06
FAM133B	1.01724	7.23262	6.71082	7.09303e-08	4.84268e-06
FAM133DP	1.01724	7.23262	6.71082	7.09303e-08	4.84268e-06
RP11-373D23.2	1.90543	5.85937	6.707	7.17699e-08	4.87278e-06
AY940074	1.87264	6.50903	6.70015	7.33001e-08	4.93554e-06
LRRC37A2	1.098	6.67749	6.69684	7.40507e-08	4.97238e-06
MS4A3	2.19039	5.03827	6.68654	7.64376e-08	5.07585e-06
TRA2A	1.0251	7.37969	6.67355	7.95579e-08	5.18502e-06
SLC22A3	1.54594	6.91114	6.67117	8.01457e-08	5.19608e-06
AK026714	2.52721	8.27742	6.65501	8.42377e-08	5.43256e-06
LOC100130429	1.11661	5.24865	6.65005	8.55343e-08	5.48721e-06
SERPINB9	1.00115	8.23871	6.64067	8.80431e-08	5.61578e-06
C9orf64	1.42324	8.62932	6.60723	9.76103e-08	6.05531e-06
FTX	1.75096	6.61894	6.60492	9.83062e-08	6.08304e-06
GOLGA6L4	1.35678	6.19458	6.59011	1.02903e-07	6.24107e-06
GOLGA6L5P	1.35678	6.19458	6.59011	1.02903e-07	6.24107e-06
GOLGA6L9	1.35678	6.19458	6.59011	1.02903e-07	6.24107e-06
LOC102724093	1.35678	6.19458	6.59011	1.02903e-07	6.24107e-06
DLEU2	1.38033	5.27106	6.5659	1.10888e-07	6.61058e-06
LOC145474	1.08922	4.1754	6.56256	1.1204e-07	6.66294e-06
FLJ38717	1.26878	6.2547	6.5431	1.18978e-07	6.99054e-06
CPA3	1.15941	6.29774	6.47729	1.45815e-07	7.93767e-06
CBLB	1.05963	6.93776	6.45387	1.56765e-07	8.43975e-06
ATF7IP	1.0157	8.0821	6.44705	1.6011e-07	8.53463e-06
PGF	1.59374	8.32774	6.44565	1.60803e-07	8.54421e-06
SSBP3-AS1	1.28894	5.5112	6.41945	1.74382e-07	9.10248e-06
ZC3H12D	1.06451	7.10291	6.41757	1.75404e-07	9.10248e-06
CBR4	1.07964	6.39776	6.38618	1.93302e-07	9.92583e-06
ZNF292	1.3459	7.72297	6.33581	2.25945e-07	1.13167e-05
TMEM181	1.46924	7.88665	6.33317	2.27799e-07	1.13862e-05
WDFY2	1.02435	6.8416	6.30529	2.48363e-07	1.22234e-05
CCDC152	1.42291	8.39211	6.25584	2.89525e-07	1.37945e-05
RP11-28F1.2	1.01341	6.18896	6.22852	3.15136e-07	1.46267e-05
LINC01002	1.05829	8.02029	6.22403	3.19558e-07	1.46267e-05
LOC100132062	1.05829	8.02029	6.22403	3.19558e-07	1.46267e-05
LOC100133182	1.05829	8.02029	6.22403	3.19558e-07	1.46267e-05
LOC100133331	1.05829	8.02029	6.22403	3.19558e-07	1.46267e-05
LOC729737	1.05829	8.02029	6.22403	3.19558e-07	1.46267e-05
RAB27B	1.10246	6.40591	6.21869	3.24892e-07	1.48153e-05
LOC729966	1.23793	8.24228	6.20987	3.33906e-07	1.50509e-05
PDE4C	1.23793	8.24228	6.20987	3.33906e-07	1.50509e-05
ID2B	1.26703	6.86206	6.20581	3.38146e-07	1.51359e-05
CMBL	1.54677	8.90238	6.19177	3.53209e-07	1.56966e-05
MINOS1P1	1.5652	5.08049	6.18114	3.65061e-07	1.61353e-05
AL833181	1.55845	6.02455	6.15756	3.92786e-07	1.6992e-05
RP3-368A4.6	1.04309	5.052	6.1566	3.9396e-07	1.70127e-05
FBXW12	1.37663	8.01745	6.13078	4.26848e-07	1.8019e-05
PELI1	1.41711	8.34461	6.10677	4.59898e-07	1.9078e-05
AK090844	1.09737	5.70786	6.1007	4.68654e-07	1.93494e-05
BC041025	1.43267	5.364	6.08252	4.95893e-07	2.02686e-05
DNAJB14	1.05389	8.10163	6.02556	5.91929e-07	2.33354e-05
CLTC-IT1	1.55564	4.82743	6.00877	6.23647e-07	2.43871e-05
RP11-403P17.4	1.72404	9.1117	5.99779	6.45319e-07	2.4879e-05
DBT	1.16589	7.47635	5.99407	6.52823e-07	2.5128e-05
PRR11	1.44128	8.97118	5.98523	6.7102e-07	2.54751e-05
DIP2A	1.00341	7.00749	5.96866	7.0649e-07	2.64441e-05
AC004951.6	1.91447	6.895	5.96383	7.17179e-07	2.67623e-05
AX747182	1.91447	6.895	5.96383	7.17179e-07	2.67623e-05
FAM63A	1.07029	8.36894	5.95883	7.28417e-07	2.71402e-05
NLN	1.12593	7.03598	5.94719	7.55281e-07	2.7844e-05
CDK13	1.33588	7.61653	5.93748	7.78435e-07	2.85205e-05
DEFA1	4.26194	8.23578	5.93674	7.80235e-07	2.85205e-05
DEFA1B	4.26194	8.23578	5.93674	7.80235e-07	2.85205e-05
DEFA3	4.26194	8.23578	5.93674	7.80235e-07	2.85205e-05
ZNF160	1.65129	7.61949	5.92645	8.05587e-07	2.92139e-05
LOC100127972	1.48799	6.25553	5.90335	8.65611e-07	3.08865e-05
NPCDR1	1.0265	5.97505	5.88721	9.10191e-07	3.22419e-05
SNORA28	1.58848	6.23788	5.82886	1.09136e-06	3.7465e-05
CTC-444N24.11	1.14971	6.0264	5.79607	1.20857e-06	4.06327e-05
HAUS2	1.05756	7.83774	5.73039	1.48259e-06	4.74939e-05
LOC100289333	1.30867	6.54851	5.72871	1.49038e-06	4.74939e-05
LOC101927166	1.04091	8.10035	5.70172	1.62094e-06	5.09896e-05
UACA	1.16795	6.86221	5.65228	1.89039e-06	5.71843e-05
LOC100131541	2.20802	5.97172	5.60689	2.17708e-06	6.34694e-05
TRMT13	1.25159	6.08458	5.56217	2.50191e-06	7.10239e-05
FLJ35934	1.01821	4.58156	5.55329	2.57194e-06	7.24233e-05
ATP8B1	2.0298	7.5366	5.4722	3.30934e-06	8.79205e-05
LCN2	1.58765	7.2512	5.44066	3.65006e-06	9.54636e-05
RP11-50B3.4	1.04297	6.39877	5.425	3.83198e-06	9.85907e-05
XK	1.24932	5.22901	5.4157	3.94431e-06	0.000100972
LOC440354	1.81951	7.30852	5.33939	4.99873e-06	0.000121935
AK057978	1.37154	5.28949	5.27576	6.08944e-06	0.000142565
SCARNA17	1.00284	6.33996	5.22356	7.15853e-06	0.000160817
PTGDR	1.09056	5.5163	5.06923	1.15386e-05	0.000229663
LOC100134445	1.14227	6.99266	5.01357	1.37014e-05	0.000263485
LOC100190986	1.87512	6.816	4.97769	1.53039e-05	0.000288681
LOC101930415	1.01817	6.8563	4.95866	1.62281e-05	0.000301403
HBG1	1.94496	7.7077	4.93497	1.74556e-05	0.000318021
HBG2	1.94496	7.7077	4.93497	1.74556e-05	0.000318021
ZNF611	1.23233	7.03863	4.89151	1.99528e-05	0.000352119
ZNF721	1.20848	8.63839	4.88337	2.04579e-05	0.000359219
MSANTD2	1.04384	6.41461	4.84785	2.28165e-05	0.000391905
RNF213	1.01066	7.91061	4.73619	3.21259e-05	0.000516932
LTF	2.4175	6.99223	4.65683	4.09367e-05	0.000630769
PROS1	1.2355	5.96578	4.63467	4.37978e-05	0.000662852
BEND2	1.12936	5.56768	4.62348	4.53159e-05	0.000678239
TCN1	1.24692	5.84045	4.58479	5.09771e-05	0.00074254
PDZK1IP1	1.19202	6.5685	4.48967	6.803e-05	0.000934677
LOC441259	1.26489	6.21515	4.39043	9.18014e-05	0.00117048
NAMPT	1.16634	8.95393	4.34551	0.000105085	0.00129447
MALAT1	1.52675	9.52196	4.22697	0.00014987	0.00167419
PF4V1	1.58937	8.26326	4.22389	0.000151251	0.0016873
GUSBP9	1.85672	6.72637	4.06068	0.000245507	0.00243859
ANP32A-IT1	1.50495	5.01436	4.05672	0.000248393	0.00246097
ALAS2	1.01964	4.95165	4.03632	0.000263793	0.00257391
OLFM4	1.42623	3.86249	3.96433	0.000325939	0.0030013
AK126278	1.47324	5.8633	3.94505	0.000344872	0.00312314
SPARC	1.01923	8.22229	3.90967	0.000382434	0.0033713
CAMP	1.24832	6.49518	3.85325	0.00045069	0.00380247
ELOVL7	1.01566	6.74245	3.77461	0.000565901	0.00448937
GP1BB	1.01133	6.7686	3.58763	0.000965884	0.00664082
SEPT5	1.01133	6.7686	3.58763	0.000965884	0.00664082
DEFA4	1.4406	5.83386	3.48905	0.00127524	0.00813401
CXCL5	1.027	6.27096	3.39093	0.00167648	0.00992887

## Sheet: Sheet8
SP VS RR
			DEGs between SP-MS and RR-MS
down-regulated							up-regulated
Gene symble	logFC	AveExpr	t	P.Value	adj.P.Val		Gene symble	logFC	AveExpr	t	P.Value	adj.P.Val
LOC286437	-1.00623	6.01312	-9.95781	9.98389e-12	9.63119e-08		MEFV	1.65615	5.90969	7.26512	1.79355e-08	2.52405e-06
TNIK	-1.0375	6.47837	-9.7703	1.63335e-11	9.63119e-08		SCD5	1.65195	6.25684	7.20185	2.16041e-08	2.83897e-06
RALGAPA2	-1.48998	6.09561	-9.7088	1.92143e-11	9.63119e-08		COLCA1	1.57789	9.69318	7.04655	3.41679e-08	3.86635e-06
TBRG1	-1.20689	6.98704	-9.67273	2.114e-11	9.63119e-08		ZNF595	1.01692	4.62179	6.48911	1.80018e-07	1.17022e-05
MAP3K8	-1.35899	6.75823	-9.59242	2.6165e-11	9.63119e-08		OPHN1	1.54321	10.0445	6.42674	2.17098e-07	1.31998e-05
AF520793	-2.94426	6.38784	-9.37544	4.67487e-11	1.3317e-07		RECK	1.0385	6.68478	6.31211	3.06488e-07	1.69573e-05
NPIPB11	-1.96712	6.73271	-9.35768	4.90355e-11	1.3317e-07		LRRC75A-AS1	1.30743	7.63413	6.27102	3.46876e-07	1.84714e-05
LOC101930306	-1.42186	6.50675	-9.28619	5.94584e-11	1.36566e-07		SNORD49A	1.30743	7.63413	6.27102	3.46876e-07	1.84714e-05
DLEU2L	-1.40136	5.14493	-9.27393	6.1461e-11	1.36566e-07		SNORD49B	1.30743	7.63413	6.27102	3.46876e-07	1.84714e-05
LOC101060275	-2.15813	7.57462	-9.08648	1.02223e-10	1.93953e-07		SNORD65	1.30743	7.63413	6.27102	3.46876e-07	1.84714e-05
AP3M2	-1.03572	6.8086	-9.06169	1.09376e-10	1.93953e-07		TCTN2	1.14472	6.61267	6.06295	6.49992e-07	2.89911e-05
SCAF4	-1.67602	6.64752	-9.05598	1.11093e-10	1.93953e-07		LOC101928288	1.31946	5.26233	5.7616	1.61825e-06	6.05718e-05
A2M-AS1	-3.06965	5.77759	-8.95644	1.45875e-10	2.10337e-07		ZNF528	1.06352	4.63458	5.49915	3.58531e-06	0.000112062
GAPDHP62	-1.31378	6.79293	-8.9237	1.59595e-10	2.10337e-07		ANKRD20A8P	1.02013	3.6585	4.49275	7.40878e-05	0.00116146
RP11-769O8.3	-1.8654	5.02784	-8.88683	1.76617e-10	2.10337e-07
GOLGA4	-1.45241	7.48323	-8.85833	1.91038e-10	2.10337e-07
LOC102724356	-2.82451	6.99213	-8.83505	2.037e-10	2.10337e-07
ATG16L1	-1.1724	6.30344	-8.83046	2.06296e-10	2.10337e-07
RP11-196G18.24	-1.04033	4.60168	-8.81761	2.13745e-10	2.10337e-07
FAM185A	-1.81691	5.54165	-8.81525	2.15139e-10	2.10337e-07
KDM4C	-1.22911	5.8544	-8.78247	2.35532e-10	2.21418e-07
RUFY2	-1.77159	4.99225	-8.75662	2.52995e-10	2.29026e-07
MBNL2	-1.50323	6.874	-8.70188	2.94448e-10	2.54031e-07
ARID2	-1.54222	6.86719	-8.68402	3.09413e-10	2.54031e-07
DENND1B	-1.31238	6.4456	-8.67665	3.15817e-10	2.54031e-07
MIR15A	-1.19887	4.95072	-8.66007	3.30706e-10	2.54031e-07
PSMD6-AS2	-2.20341	7.59948	-8.65803	3.32584e-10	2.54031e-07
RP11-138A9.1	-3.29436	7.5145	-8.62948	3.60083e-10	2.66702e-07
CTNNB1	-1.06783	7.40939	-8.6075	3.82818e-10	2.69036e-07
SLC26A6	-1.37049	5.88169	-8.60523	3.85249e-10	2.69036e-07
DSERG1	-2.66434	6.64602	-8.57964	4.13744e-10	2.80909e-07
RP11-258C19.7	-1.10674	5.66848	-8.56658	4.29103e-10	2.83372e-07
C5orf28	-1.68816	6.26499	-8.55715	4.40559e-10	2.83372e-07
RP11-182L21.5	-2.6433	6.07721	-8.4554	5.8575e-10	3.58532e-07
MGC12488	-1.46649	4.80061	-8.4342	6.21661e-10	3.70601e-07
NSUN6	-1.45217	6.33583	-8.31419	8.71579e-10	4.44031e-07
CLC	-3.43781	7.16104	-8.28081	9.57756e-10	4.60826e-07
RAB12	-1.23767	6.93449	-8.27941	9.61547e-10	4.60826e-07
KIAA0754	-1.09081	5.54389	-8.256	1.02739e-09	4.73801e-07
CCDC84	-1.16525	7.55328	-8.22777	1.11286e-09	5.03713e-07
SND1-IT1	-1.21176	6.38337	-8.21052	1.16862e-09	5.19334e-07
COCH	-1.13846	6.81922	-8.19519	1.22057e-09	5.32734e-07
PWAR6	-2.22843	5.72045	-8.14758	1.39729e-09	5.77737e-07
MCTP2	-1.0042	5.61418	-8.14235	1.41822e-09	5.77737e-07
CDC42-IT1	-1.7831	6.38355	-8.1056	1.57453e-09	6.2072e-07
VPS13A	-1.0068	5.43794	-8.05899	1.7983e-09	6.6597e-07
RAB11FIP3	-1.08836	6.0933	-8.05156	1.83679e-09	6.70071e-07
ZNF493	-1.2282	6.37942	-8.01946	2.01319e-09	7.23624e-07
LOC100130429	-1.32759	5.291	-7.98702	2.20886e-09	7.71269e-07
CRIPT	-1.11239	7.15988	-7.97156	2.30877e-09	7.83763e-07
ASAP1-IT2	-1.31967	5.10822	-7.93413	2.57021e-09	8.37894e-07
ZMYM2	-1.17205	6.04331	-7.90935	2.75959e-09	8.75972e-07
NUPL1	-1.51826	6.45551	-7.9004	2.83137e-09	8.87235e-07
NPIPB3	-1.84025	6.72779	-7.84256	3.34354e-09	1.02154e-06
LOC101929910	-2.06892	7.05858	-7.82379	3.52927e-09	1.06497e-06
RPS16P5	-2.229	7.37326	-7.77141	4.10451e-09	1.13927e-06
AF007147	-2.00825	7.2356	-7.77056	4.11455e-09	1.13927e-06
LOC101929886	-1.29	6.30122	-7.76487	4.18269e-09	1.13927e-06
PAPD4	-1.35227	7.75151	-7.74731	4.40027e-09	1.15835e-06
RP11-319G9.3	-1.79825	4.94083	-7.7439	4.44383e-09	1.15835e-06
RP5-1074L1.4	-1.27034	5.07498	-7.73939	4.5022e-09	1.15835e-06
KPNA5	-1.07665	6.82672	-7.7279	4.65412e-09	1.17202e-06
USP24	-1.06731	6.89741	-7.72518	4.69084e-09	1.17202e-06
BD495725	-1.55253	6.01684	-7.7219	4.73559e-09	1.17202e-06
CRIM1	-1.60253	5.69014	-7.72106	4.74716e-09	1.17202e-06
RPS6KA5	-1.01226	6.93638	-7.71597	4.81748e-09	1.17749e-06
MGEA5	-1.17315	8.13763	-7.70697	4.9446e-09	1.18486e-06
FLJ38717	-1.46387	6.28576	-7.70292	5.00283e-09	1.18718e-06
HNRNPU-AS1	-2.44464	6.12314	-7.69408	5.13242e-09	1.19474e-06
FAM133B	-1.19408	7.26533	-7.68756	5.23024e-09	1.19474e-06
FAM133DP	-1.19408	7.26533	-7.68756	5.23024e-09	1.19474e-06
LOC613037	-1.97371	6.89338	-7.66774	5.53924e-09	1.21973e-06
NPIPB4	-1.97371	6.89338	-7.66774	5.53924e-09	1.21973e-06
NPIPB5	-1.97371	6.89338	-7.66774	5.53924e-09	1.21973e-06
RP11-846E15.2	-1.41157	7.01685	-7.65641	5.72419e-09	1.23839e-06
LUC7L3	-1.26103	8.03655	-7.65634	5.72531e-09	1.23839e-06
LOC100272216	-2.71776	7.00753	-7.62967	6.18564e-09	1.30316e-06
RP11-158G18.1	-3.0219	6.70552	-7.62399	6.28843e-09	1.30316e-06
AKAP10	-1.2634	6.71951	-7.62383	6.29133e-09	1.30316e-06
USP34	-1.35136	7.98988	-7.61213	6.50877e-09	1.32573e-06
EBLN2	-1.195	6.41912	-7.57185	7.31682e-09	1.46588e-06
PDK1	-1.20635	6.91689	-7.54919	7.81531e-09	1.52731e-06
ZBTB20	-1.65452	6.8888	-7.54393	7.93584e-09	1.52731e-06
ATXN7	-1.34036	8.51975	-7.51239	8.69918e-09	1.64826e-06
RP11-747H7.3	-1.72707	5.80645	-7.49678	9.10402e-09	1.69863e-06
N4BP2L2	-1.28184	8.08736	-7.49111	9.25577e-09	1.70736e-06
SGK494	-1.21625	5.11038	-7.47262	9.76884e-09	1.77853e-06
AC068039.4	-1.56492	5.57686	-7.46318	1.00416e-08	1.77853e-06
NOTCH2NL	-1.83842	9.36285	-7.4567	1.02332e-08	1.78657e-06
RP4-635E18.8	-1.15875	7.33883	-7.44475	1.05967e-08	1.83691e-06
CBFA2T2	-1.05008	6.20591	-7.4325	1.09826e-08	1.87719e-06
U50535	-2.21331	8.4293	-7.41522	1.15519e-08	1.96077e-06
SLC20A1	-1.15624	8.27925	-7.40025	1.20685e-08	2.00702e-06
C5orf56	-1.04314	7.09714	-7.40019	1.20707e-08	2.00702e-06
ZNF638-IT1	-1.00604	7.60805	-7.39647	1.22029e-08	2.01529e-06
AY940074	-2.09775	6.53084	-7.39404	1.229e-08	2.01605e-06
PRO2852	-2.36453	7.1943	-7.37935	1.28298e-08	2.07673e-06
HCRP1	-1.35555	6.2363	-7.36806	1.32611e-08	2.10473e-06
RBM26	-1.0587	6.30879	-7.34576	1.41562e-08	2.21799e-06
KANSL1L	-1.35511	5.1365	-7.34254	1.42905e-08	2.22313e-06
RP11-373D23.2	-2.34411	5.96172	-7.33196	1.47407e-08	2.22313e-06
ZNF451	-1.1055	7.08817	-7.32702	1.49558e-08	2.22313e-06
CBLB	-1.19462	6.95302	-7.32584	1.50076e-08	2.22313e-06
LOC100131564	-1.31241	7.73686	-7.31399	1.55382e-08	2.27006e-06
RP11-271C24.3	-2.4608	6.81119	-7.31257	1.56031e-08	2.27006e-06
MED13L	-1.01847	7.18003	-7.29611	1.63751e-08	2.36829e-06
LOC145474	-1.12128	4.15028	-7.28186	1.70751e-08	2.455e-06
REV3L	-1.03469	6.7492	-7.27983	1.71771e-08	2.45522e-06
GPRASP1	-1.11052	6.51332	-7.27057	1.76506e-08	2.50823e-06
LOC100506076	-1.27154	5.45126	-7.26255	1.80717e-08	2.52405e-06
LOC100506123	-1.27154	5.45126	-7.26255	1.80717e-08	2.52405e-06
WDFY2	-1.17815	6.86526	-7.24733	1.88983e-08	2.60967e-06
CDC14A	-1.1357	5.46431	-7.24086	1.92617e-08	2.64491e-06
CEPT1	-1.75963	6.19307	-7.22702	2.00616e-08	2.72414e-06
ZNF700	-1.44832	5.93398	-7.22182	2.0371e-08	2.75088e-06
NAA25	-1.05717	5.7107	-7.20219	2.15829e-08	2.83897e-06
AK025288	-1.32771	5.2421	-7.17275	2.3538e-08	3.02798e-06
AJ420595	-1.89962	4.94801	-7.16872	2.38197e-08	3.04817e-06
PTBP2	-1.08844	5.62061	-7.16064	2.43939e-08	3.10539e-06
LOC727820	-2.67084	8.21926	-7.1473	2.53727e-08	3.18248e-06
GDAP2	-1.57145	6.86033	-7.12945	2.67442e-08	3.27162e-06
ZNF302	-1.00642	6.31203	-7.06591	3.2266e-08	3.77462e-06
GABPB1-AS1	-1.44386	6.13225	-7.06581	3.22762e-08	3.77462e-06
SRSF11	-1.14175	8.59131	-7.06138	3.27018e-08	3.78929e-06
PKN2	-1.29602	6.57077	-7.06051	3.27859e-08	3.78929e-06
RICTOR	-1.2165	7.74086	-7.04905	3.39157e-08	3.86635e-06
MIR612	-2.37715	8.72826	-7.04678	3.41451e-08	3.86635e-06
NEAT1	-2.37715	8.72826	-7.04678	3.41451e-08	3.86635e-06
PRPF38B	-1.67936	8.00079	-7.02294	3.66412e-08	4.10818e-06
LOC102725188	-2.80463	8.86669	-7.00935	3.81459e-08	4.238e-06
RUNX1-IT1	-1.72379	6.54944	-6.98251	4.13029e-08	4.52702e-06
CCDC91	-1.11314	7.0821	-6.97898	4.17371e-08	4.55419e-06
FAM161B	-1.46929	8.25653	-6.93099	4.81236e-08	5.06999e-06
SLC22A3	-1.68868	6.91266	-6.90079	5.26393e-08	5.39576e-06
DIP2A	-1.19368	7.04581	-6.89398	5.37142e-08	5.44765e-06
OTUD6B	-1.14068	6.70749	-6.88327	5.54519e-08	5.56416e-06
BC041025	-1.55951	5.36334	-6.87889	5.61796e-08	5.56416e-06
PELI1	-1.61114	8.37016	-6.87076	5.75535e-08	5.60618e-06
SRSF4	-1.08398	7.66622	-6.85037	6.11513e-08	5.83851e-06
LINC00597	-1.06545	4.39513	-6.84797	6.15896e-08	5.8451e-06
SLC38A9	-1.14205	6.11906	-6.82676	6.56032e-08	6.09686e-06
TAF15	-1.63906	6.65522	-6.80488	7.00202e-08	6.35924e-06
AK026714	-2.71955	8.26424	-6.79566	7.19702e-08	6.44357e-06
TRA2A	-1.08844	7.36873	-6.73948	8.50951e-08	7.33192e-06
NKTR	-1.80408	7.1724	-6.7308	8.73284e-08	7.46322e-06
AKAP9	-1.21144	6.59462	-6.71952	9.03182e-08	7.62025e-06
LOC729966	-1.3998	8.26169	-6.70893	9.32187e-08	7.77628e-06
PDE4C	-1.3998	8.26169	-6.70893	9.32187e-08	7.77628e-06
LOC100131541	-2.66112	6.0692	-6.70712	9.3725e-08	7.79192e-06
HBA1	-4.03881	10.6141	-6.70038	9.56312e-08	7.8701e-06
HBA2	-4.03881	10.6141	-6.70038	9.56312e-08	7.8701e-06
HYMAI	-1.35602	5.47048	-6.67654	1.0269e-07	8.20243e-06
AMY1A	-1.06105	5.76774	-6.65161	1.10636e-07	8.54435e-06
AMY1B	-1.06105	5.76774	-6.65161	1.10636e-07	8.54435e-06
AMY1C	-1.06105	5.76774	-6.65161	1.10636e-07	8.54435e-06
AMY2A	-1.06105	5.76774	-6.65161	1.10636e-07	8.54435e-06
C9orf64	-1.5232	8.61871	-6.65107	1.10816e-07	8.54435e-06
HBB	-4.15101	10.2666	-6.6343	1.16516e-07	8.89963e-06
RP11-732A19.1	-1.14852	4.47796	-6.61389	1.23853e-07	9.34327e-06
PGF	-1.71151	8.31808	-6.58785	1.33894e-07	9.97757e-06
LOC100289333	-1.5434	6.59336	-6.58536	1.34897e-07	1.00086e-05
ZCCHC7	-1.21103	7.22602	-6.58445	1.35264e-07	1.00086e-05
PCNX	-1.17957	6.10032	-6.58276	1.35949e-07	1.00086e-05
ANKRD36B	-2.38883	6.85841	-6.57757	1.38082e-07	1.0056e-05
AC004951.6	-2.14152	6.91612	-6.56357	1.43996e-07	1.03516e-05
AX747182	-2.14152	6.91612	-6.56357	1.43996e-07	1.03516e-05
LOC101930059	-1.69914	6.30517	-6.55819	1.46336e-07	1.04632e-05
LOC100127972	-1.69062	6.28195	-6.54815	1.50804e-07	1.05918e-05
RP11-403P17.4	-1.944	9.13664	-6.54315	1.53082e-07	1.06904e-05
CCDC152	-1.56719	8.39845	-6.52906	1.5969e-07	1.09947e-05
LOC101060405	-1.00103	7.11272	-6.52666	1.6084e-07	1.10428e-05
ZNF160	-1.84742	7.63782	-6.52559	1.6136e-07	1.10475e-05
NPCDR1	-1.24518	6.02344	-6.523	1.62614e-07	1.11023e-05
AC092620.2	-1.70046	5.30902	-6.51766	1.65244e-07	1.12191e-05
AK096592	-1.0924	7.03785	-6.51184	1.68153e-07	1.13223e-05
AK090844	-1.21178	5.71395	-6.46795	1.91824e-07	1.23158e-05
DLEU2	-1.4393	5.24624	-6.46626	1.928e-07	1.23361e-05
ATF7IP	-1.07758	8.07091	-6.46176	1.95421e-07	1.23743e-05
ALMS1	-1.12651	6.76218	-6.45862	1.97276e-07	1.24595e-05
NLN	-1.25876	7.04813	-6.44729	2.041e-07	1.27586e-05
OGT	-1.05248	8.27908	-6.43726	2.10349e-07	1.30122e-05
LOC654780	-1.02163	5.85026	-6.42862	2.15878e-07	1.31853e-05
ZNF292	-1.43688	7.71158	-6.42794	2.16321e-07	1.31853e-05
LPP	-1.03212	7.19601	-6.42518	2.18123e-07	1.32292e-05
MINOS1P1	-1.61048	5.0441	-6.41071	2.27817e-07	1.36786e-05
CPA3	-1.06573	6.22214	-6.40769	2.29893e-07	1.37385e-05
AK128734	-1.05541	5.16034	-6.38761	2.44201e-07	1.43136e-05
CDK13	-1.50156	7.63404	-6.38641	2.45085e-07	1.4331e-05
CMBL	-1.67232	8.89732	-6.36596	2.60635e-07	1.49541e-05
LOC101927166	-1.19229	8.12251	-6.3634	2.6265e-07	1.49683e-05
PRR11	-1.58492	8.97664	-6.36331	2.62719e-07	1.49683e-05
RP11-28F1.2	-1.18602	6.22018	-6.35469	2.69625e-07	1.52904e-05
FTX	-1.74219	6.55551	-6.34652	2.76332e-07	1.55593e-05
MS4A3	-1.76559	4.80069	-6.32841	2.9181e-07	1.621e-05
AK057978	-1.66022	5.35281	-6.31194	3.0665e-07	1.69573e-05
RP11-97C16.1	-1.17066	5.36704	-6.29885	3.18984e-07	1.74032e-05
UACA	-1.3486	6.89121	-6.29716	3.20607e-07	1.7414e-05
DLGAP4	-1.11354	6.96303	-6.24375	3.76596e-07	1.97952e-05
FBXW12	-1.48688	8.01237	-6.23168	3.90551e-07	2.01389e-05
DBT	-1.27016	7.47622	-6.2152	4.10455e-07	2.09318e-05
HSPBAP1	-1.11641	6.54671	-6.20409	4.24438e-07	2.14785e-05
LOC100996412	-2.0359	7.0241	-6.18679	4.47176e-07	2.25497e-05
FAM63A	-1.14424	8.36049	-6.18659	4.47451e-07	2.25497e-05
FOXP1-IT1	-1.1052	5.78749	-6.16898	4.71881e-07	2.3395e-05
DNAJB14	-1.11255	8.0879	-6.15488	4.9239e-07	2.43123e-05
AX747826	-1.20227	6.09393	-6.14105	5.13385e-07	2.49466e-05
ZC3H7B	-1.00145	6.49181	-6.13105	5.29125e-07	2.54084e-05
CLTC-IT1	-1.6122	4.79567	-6.12086	5.45655e-07	2.59982e-05
HAUS2	-1.18469	7.85006	-6.11262	5.59404e-07	2.64467e-05
SRGAP2	-1.0278	6.20749	-6.10683	5.69275e-07	2.67067e-05
DAPK1-IT1	-1.32824	5.32091	-6.09309	5.93418e-07	2.73321e-05
GOLGA6L4	-1.3694	6.15285	-6.09077	5.97589e-07	2.73321e-05
GOLGA6L5P	-1.3694	6.15285	-6.09077	5.97589e-07	2.73321e-05
GOLGA6L9	-1.3694	6.15285	-6.09077	5.97589e-07	2.73321e-05
LOC102724093	-1.3694	6.15285	-6.09077	5.97589e-07	2.73321e-05
AL833181	-1.68017	6.01762	-6.0904	5.9826e-07	2.73321e-05
SLC5A3	-1.16607	7.02523	-6.06414	6.47663e-07	2.894e-05
RP11-50B3.4	-1.13676	6.39884	-6.0135	7.54807e-07	3.28859e-05
FLJ35934	-1.21621	4.62232	-6.01162	7.59119e-07	3.29691e-05
UBXN2A	-1.11563	8.81568	-6.01149	7.59414e-07	3.29691e-05
C8orf60	-1.08649	6.52447	-6.00066	7.84699e-07	3.38862e-05
ZC3H12D	-1.04124	7.05748	-5.9642	8.76202e-07	3.67343e-05
MIAT	-1.01998	6.65749	-5.95309	9.0617e-07	3.77319e-05
SSBP3-AS1	-1.28733	5.46636	-5.94987	9.15035e-07	3.80362e-05
LOC100190986	-2.23242	6.88828	-5.93847	9.47145e-07	3.92375e-05
ID2B	-1.31909	6.83849	-5.88994	1.09704e-06	4.41085e-05
AP000347.2	-1.05824	5.29487	-5.88976	1.09764e-06	4.41085e-05
ATP8B1	-2.26235	7.55587	-5.8888	1.10082e-06	4.41085e-05
TRMT13	-1.37929	6.09046	-5.79698	1.45375e-06	5.5072e-05
CBR4	-1.08121	6.36131	-5.75868	1.63264e-06	6.09268e-05
LOC440354	-2.1082	7.35647	-5.72329	1.81749e-06	6.64021e-05
SCARNA17	-1.26997	6.40769	-5.69757	1.96481e-06	7.05197e-05
ZFYVE16	-1.09867	5.52804	-5.60798	2.57783e-06	8.81221e-05
SNORA28	-1.59312	6.18514	-5.60181	2.6265e-06	8.94109e-05
RP11-395B7.7	-1.09997	6.6858	-5.59646	2.66943e-06	9.02437e-05
ANKRD10-IT1	-1.22928	8.05485	-5.58787	2.73985e-06	9.21205e-05
HBD	-1.86788	6.02574	-5.56539	2.93306e-06	9.60454e-05
DICER1	-1.01451	8.25907	-5.56341	2.95075e-06	9.6163e-05
LOC441259	-1.63622	6.31372	-5.55671	3.01133e-06	9.76165e-05
ZNF587B	-1.07328	6.59588	-5.54483	3.12174e-06	0.000100397
ZNF721	-1.41134	8.67449	-5.53717	3.19504e-06	0.000102485
ZNF611	-1.43379	7.07337	-5.52917	3.27348e-06	0.000104707
BC044596	-1.14463	7.00242	-5.51936	3.37223e-06	0.000107044
C17orf104	-1.11384	4.33637	-5.50475	3.52497e-06	0.000110742
DEFA1	-3.83222	7.92524	-5.45788	4.06299e-06	0.000123058
DEFA1B	-3.83222	7.92524	-5.45788	4.06299e-06	0.000123058
DEFA3	-3.83222	7.92524	-5.45788	4.06299e-06	0.000123058
TMEM181	-1.33636	7.78542	-5.36417	5.39693e-06	0.000153899
AK126278	-1.87835	5.96764	-5.35358	5.57281e-06	0.000157469
CTC-444N24.11	-1.12856	5.97887	-5.35066	5.62239e-06	0.000158321
ZNF83	-1.03055	6.23683	-5.32703	6.03941e-06	0.000167175
ANKRD20A9P	-1.22248	6.4281	-5.30059	6.54285e-06	0.000178085
LOC102723891	-1.22248	6.4281	-5.30059	6.54285e-06	0.000178085
LOC102725051	-1.22248	6.4281	-5.30059	6.54285e-06	0.000178085
PLGLB1	-1.06707	4.56402	-5.17425	9.58859e-06	0.000243369
SMG1P5	-1.03526	7.47594	-5.07365	1.29937e-05	0.000307218
GUSBP9	-2.33771	6.84656	-5.07276	1.30286e-05	0.000307676
LCN2	-1.16695	7.03586	-4.97657	1.74133e-05	0.000385172
RNF213	-1.13133	7.92206	-4.84028	2.62378e-05	0.000532203
LOC100134445	-1.12773	6.94791	-4.79665	2.99092e-05	0.000590501
LOC101060596	-1.06666	5.82385	-4.75754	3.36302e-05	0.000639183
LOC102723773	-1.06666	5.82385	-4.75754	3.36302e-05	0.000639183
SMG1P7	-1.06666	5.82385	-4.75754	3.36302e-05	0.000639183
ANP32A-IT1	-1.7067	5.03985	-4.72069	3.75536e-05	0.000692609
CTB-181H17.1	-1.17537	5.01142	-4.71803	3.7854e-05	0.00069566
NAMPT	-1.33701	8.97917	-4.61551	5.14185e-05	0.000875799
HIST2H2BE	-1.04361	7.53619	-4.50372	7.17148e-05	0.001136
AX746823	-1.79584	5.70144	-4.37229	0.00010583	0.00152697
HIST1H2BG	-1.07413	6.69558	-4.21066	0.000170208	0.00217244
MALAT1	-1.61544	9.50348	-4.17743	0.000187576	0.0023247
HIST1H2BJ	-1.42863	6.50585	-4.1082	0.00022953	0.0027063
GUSBP3	-1.54102	6.81473	-3.97417	0.000338413	0.00362149
LTF	-1.8171	6.67971	-3.91614	0.000399909	0.00410525
HBG1	-1.48256	7.46416	-3.91614	0.00039991	0.00410525
HBG2	-1.48256	7.46416	-3.91614	0.00039991	0.00410525
NR4A2	-1.27947	7.0814	-3.81483	0.000534327	0.00508172
