# Supplementary material for: Identification of key genes associated with multiple sclerosis based on gene expression data from peripheral blood mononuclear cells
Source: PeerJ. 2020 Feb 3;8:e8357. doi: 10.7717/peerj.8357 (PMC7003695; doi:10.7717/peerj.8357)
Supplement: Table S2 [file peerj-08-8357-s006.xlsx]

## Sheet: Sheet1
Enriched GO terms of up-regulated common DEGs
ID	Description	GeneRatio	BgRatio	pvalue	p.adjust	qvalue	geneID	Count
GO:0045088	regulation of innate immune response	17/158	350/16672	3.7961e-08	8.00355e-05	7.15447e-05	TICAM2/TLR8/NLRC4/TRIM5/PTPN6/CD1D/DDX60/DDX58/TLR7/IFI16/ICAM2/TLR5/SAMHD1/HCK/PRKACB/HSPA1A/HSPA1B	17
GO:0002218	activation of innate immune response	14/158	246/16672	9.31893e-08	8.00355e-05	7.15447e-05	TICAM2/TLR8/NLRC4/TRIM5/DDX60/DDX58/TLR7/IFI16/ICAM2/TLR5/HCK/PRKACB/HSPA1A/HSPA1B	14
GO:0045089	positive regulation of innate immune response	15/158	288/16672	1.01697e-07	8.00355e-05	7.15447e-05	TICAM2/TLR8/NLRC4/TRIM5/CD1D/DDX60/DDX58/TLR7/IFI16/ICAM2/TLR5/HCK/PRKACB/HSPA1A/HSPA1B	15
GO:0009615	response to virus	15/158	304/16672	2.04964e-07	9.51152e-05	8.50246e-05	TRIM34/TLR8/TRIM5/OAS1/BANF1/MEF2C/DDX60/DDX58/TLR7/IFI16/OAS2/SAMHD1/HCK/PRF1/GBP1	15
GO:0031349	positive regulation of defense response	17/158	396/16672	2.23488e-07	9.51152e-05	8.50246e-05	CCR2/TICAM2/TLR8/NLRC4/TRIM5/MEF2C/CD1D/DDX60/DDX58/TLR7/IFI16/ICAM2/TLR5/HCK/PRKACB/HSPA1A/HSPA1B	17
GO:0051607	defense response to virus	13/158	226/16672	2.41716e-07	9.51152e-05	8.50246e-05	TRIM34/TLR8/TRIM5/OAS1/DDX60/DDX58/TLR7/IFI16/OAS2/SAMHD1/HCK/PRF1/GBP1	13
GO:0002757	immune response-activating signal transduction	17/158	457/16672	1.631e-06	0.000550114	0.000491754	TICAM2/TLR8/TRIM5/PTPN6/MNDA/MEF2C/DDX60/DDX58/TLR7/ICAM2/TLR5/HCK/THEMIS/PRKACB/GBP1/HSPA1A/HSPA1B	17
GO:0032757	positive regulation of interleukin-8 production	6/158	42/16672	2.60642e-06	0.000769221	0.000687616	TLR8/DDX58/TLR7/TLR5/HSPA1A/HSPA1B	6
GO:0002758	innate immune response-activating signal transduction	12/158	239/16672	2.97406e-06	0.000780195	0.000697425	TICAM2/TLR8/TRIM5/DDX60/DDX58/TLR7/ICAM2/TLR5/HCK/PRKACB/HSPA1A/HSPA1B	12
GO:0002764	immune response-regulating signaling pathway	17/158	490/16672	4.16591e-06	0.000983571	0.000879226	TICAM2/TLR8/TRIM5/PTPN6/MNDA/MEF2C/DDX60/DDX58/TLR7/ICAM2/TLR5/HCK/THEMIS/PRKACB/GBP1/HSPA1A/HSPA1B	17
GO:0060333	interferon-gamma-mediated signaling pathway	7/158	85/16672	1.59678e-05	0.00308101	0.00275415	TRIM34/IRF2/TRIM5/OAS1/OAS2/HCK/GBP1	7
GO:0032677	regulation of interleukin-8 production	6/158	57/16672	1.60374e-05	0.00308101	0.00275415	TLR8/DDX58/TLR7/TLR5/HSPA1A/HSPA1B	6
GO:0002221	pattern recognition receptor signaling pathway	9/158	155/16672	1.69645e-05	0.00308101	0.00275415	TICAM2/TLR8/TRIM5/DDX60/DDX58/TLR7/TLR5/HSPA1A/HSPA1B	9
GO:0032637	interleukin-8 production	6/158	63/16672	2.86556e-05	0.00483256	0.00431989	TLR8/DDX58/TLR7/TLR5/HSPA1A/HSPA1B	6
GO:0098542	defense response to other organism	15/158	475/16672	4.68122e-05	0.00736824	0.00658656	TRIM34/TLR8/NLRC4/TRIM5/OAS1/DDX60/DDX58/TLR7/IFI16/OAS2/TLR5/SAMHD1/HCK/PRF1/GBP1	15
GO:0060337	type I interferon signaling pathway	6/158	80/16672	0.000111022	0.015419	0.0137832	IRF2/OAS1/PTPN6/OAS2/SAMHD1/XAF1	6
GO:0071357	cellular response to type I interferon	6/158	80/16672	0.000111022	0.015419	0.0137832	IRF2/OAS1/PTPN6/OAS2/SAMHD1/XAF1	6
GO:0034340	response to type I interferon	6/158	84/16672	0.000145578	0.019095	0.0170693	IRF2/OAS1/PTPN6/OAS2/SAMHD1/XAF1	6
GO:0008340	determination of adult lifespan	3/158	12/16672	0.000172548	0.0214414	0.0191667	TP53/MSH2/LRRK2	3
GO:0001819	positive regulation of cytokine production	12/158	376/16672	0.000249389	0.0294404	0.0263171	CCR2/TICAM2/TLR8/DDX60/DDX58/TLR7/IFI16/CSF1R/TLR5/CYP1B1/HSPA1A/HSPA1B	12
GO:0032727	positive regulation of interferon-alpha production	3/158	14/16672	0.000281537	0.030214	0.0270087	TLR8/DDX58/TLR7	3
GO:0035589	G-protein coupled purinergic nucleotide receptor signaling pathway	3/158	14/16672	0.000281537	0.030214	0.0270087	P2RY13/P2RY14/GPR171	3
GO:0071346	cellular response to interferon-gamma	7/158	138/16672	0.000345036	0.0354187	0.0316612	TRIM34/IRF2/TRIM5/OAS1/OAS2/HCK/GBP1	7
GO:0001774	microglial cell activation	3/158	16/16672	0.000427143	0.0420202	0.0375623	TLR8/CX3CR1/TLR7	3
GO:0002460	adaptive immune response based on somatic recombination of immune receptors built from immunoglobulin superfamily domains	9/158	238/16672	0.000449711	0.0424707	0.0379651	CCR2/TLR8/PTPN6/GAPT/MEF2C/STX7/MSH2/BTN3A3/BTN3A2	9
GO:0032647	regulation of interferon-alpha production	3/158	17/16672	0.000515076	0.0467729	0.0418108	TLR8/DDX58/TLR7	3

## Sheet: Sheet2
Enriched GO terms of up-regulated DEGs of PP-MS
ID	Description	GeneRatio	BgRatio	pvalue	p.adjust	qvalue	geneID	Count
GO:0072522	purine-containing compound biosynthetic process	37/341	247/16672	1.40583e-21	5.29043e-18	3.71925e-18	ADSL/ADSS/ADCY2/ALDOA/ADM/APLP1/ADCY5/ADORA2B/ADCY3/AK1/ADRA2A/ADRB2/APOE/ADCY7/AK4/ADRB1/ADCYAP1/ADCY8/ADCY6/ADCY1/ABCA1/AMD1/ACR/APRT/ADA/ADCYAP1R1/AMPD2/ADK/ADRB3/AMPD1/AK2/ADCY9/ADORA2A/AMPD3/ACAT1/AQP1/ATIC	37
GO:0006164	purine nucleotide biosynthetic process	36/341	236/16672	2.71583e-21	5.29043e-18	3.71925e-18	ADSL/ADSS/ADCY2/ALDOA/ADM/APLP1/ADCY5/ADORA2B/ADCY3/AK1/ADRA2A/ADRB2/APOE/ADCY7/AK4/ADRB1/ADCYAP1/ADCY8/ADCY6/ADCY1/ABCA1/ACR/APRT/ADA/ADCYAP1R1/AMPD2/ADK/ADRB3/AMPD1/AK2/ADCY9/ADORA2A/AMPD3/ACAT1/AQP1/ATIC	36
GO:0009152	purine ribonucleotide biosynthetic process	35/341	233/16672	1.6762e-20	2.17682e-17	1.53034e-17	ADSL/ADSS/ADCY2/ALDOA/ADM/APLP1/ADCY5/ADORA2B/ADCY3/AK1/ADRA2A/ADRB2/APOE/ADCY7/AK4/ADRB1/ADCYAP1/ADCY8/ADCY6/ADCY1/ABCA1/ACR/APRT/ADCYAP1R1/AMPD2/ADK/ADRB3/AMPD1/AK2/ADCY9/ADORA2A/AMPD3/ACAT1/AQP1/ATIC	35
GO:0009260	ribonucleotide biosynthetic process	35/341	246/16672	1.02743e-19	1.00072e-16	7.03518e-17	ADSL/ADSS/ADCY2/ALDOA/ADM/APLP1/ADCY5/ADORA2B/ADCY3/AK1/ADRA2A/ADRB2/APOE/ADCY7/AK4/ADRB1/ADCYAP1/ADCY8/ADCY6/ADCY1/ABCA1/ACR/APRT/ADCYAP1R1/AMPD2/ADK/ADRB3/AMPD1/AK2/ADCY9/ADORA2A/AMPD3/ACAT1/AQP1/ATIC	35
GO:0046390	ribose phosphate biosynthetic process	35/341	250/16672	1.75323e-19	1.36611e-16	9.60399e-17	ADSL/ADSS/ADCY2/ALDOA/ADM/APLP1/ADCY5/ADORA2B/ADCY3/AK1/ADRA2A/ADRB2/APOE/ADCY7/AK4/ADRB1/ADCYAP1/ADCY8/ADCY6/ADCY1/ABCA1/ACR/APRT/ADCYAP1R1/AMPD2/ADK/ADRB3/AMPD1/AK2/ADCY9/ADORA2A/AMPD3/ACAT1/AQP1/ATIC	35
GO:0006067	ethanol metabolic process	12/341	14/16672	3.88118e-19	2.52018e-16	1.77173e-16	ALDH1B1/ALDH2/ALDH1A1/ALDH3B2/ADH1C/ALDH3B1/ADH4/ADH1B/ADH7/ADH1A/ADH6/ADH5	12
GO:0030104	water homeostasis	20/341	69/16672	4.38715e-18	2.44176e-15	1.7166e-15	AQP8/AQP9/ADCY2/AQP2/AQP6/ADCY5/ADCY3/ANXA7/ALOX12B/ADCY7/AQP5/ADCY8/AQP3/ADCY6/ADCY1/ADCY9/AQP4/AQP7/AQP1/ALOX12	20
GO:0009165	nucleotide biosynthetic process	36/341	297/16672	6.43575e-18	3.13421e-15	2.2034e-15	ADSL/ADSS/ADCY2/ALDOA/ADM/APLP1/ADCY5/ADORA2B/ADCY3/AK1/ADRA2A/ADRB2/APOE/ADCY7/AK4/ADRB1/ADCYAP1/ADCY8/ADCY6/ADCY1/ABCA1/ACR/APRT/ADA/ADCYAP1R1/AMPD2/ADK/ADRB3/AMPD1/AK2/ADCY9/ADORA2A/AMPD3/ACAT1/AQP1/ATIC	36
GO:1901293	nucleoside phosphate biosynthetic process	36/341	300/16672	8.95417e-18	3.87616e-15	2.725e-15	ADSL/ADSS/ADCY2/ALDOA/ADM/APLP1/ADCY5/ADORA2B/ADCY3/AK1/ADRA2A/ADRB2/APOE/ADCY7/AK4/ADRB1/ADCYAP1/ADCY8/ADCY6/ADCY1/ABCA1/ACR/APRT/ADA/ADCYAP1R1/AMPD2/ADK/ADRB3/AMPD1/AK2/ADCY9/ADORA2A/AMPD3/ACAT1/AQP1/ATIC	36
GO:0003018	vascular process in circulatory system	26/341	155/16672	1.0216e-16	3.98015e-14	2.79811e-14	ANGPT1/ABR/ADORA1/AKT1/ADM/ADORA2B/ADRA2A/ADRA1B/ADRA2B/ADRB2/ACTA2/APOE/ATP1A2/ADRB1/ADCYAP1/ABL1/ADRA1D/ADCY6/ADRA1A/ADRA2C/AGT/ADRB3/ASIC2/ALOX12/AGTR1/AGTR2	26
GO:0050880	regulation of blood vessel size	24/341	132/16672	2.35996e-16	8.35855e-14	5.87619e-14	ADORA1/AKT1/ADM/ADORA2B/ADRA2A/ADRA1B/ADRA2B/ADRB2/ACTA2/APOE/ATP1A2/ADRB1/ADCYAP1/ABL1/ADRA1D/ADCY6/ADRA1A/ADRA2C/AGT/ADRB3/ASIC2/ALOX12/AGTR1/AGTR2	24
GO:0035150	regulation of tube size	24/341	133/16672	2.8268e-16	9.17769e-14	6.45205e-14	ADORA1/AKT1/ADM/ADORA2B/ADRA2A/ADRA1B/ADRA2B/ADRB2/ACTA2/APOE/ATP1A2/ADRB1/ADCYAP1/ABL1/ADRA1D/ADCY6/ADRA1A/ADRA2C/AGT/ADRB3/ASIC2/ALOX12/AGTR1/AGTR2	24
GO:0015850	organic hydroxy compound transport	28/341	197/16672	5.66828e-16	1.69874e-13	1.19424e-13	AQP8/AQP9/AQP2/AQP6/APOA2/ABCA2/APOC3/ALB/ADRA2A/ADRA2B/APOC1/APOE/AQP5/AQP3/APOC2/GRK2/APOA1/ABCA1/ADRA2C/ABAT/AGT/APOB/APOA4/AQP4/AQP7/AQP1/AGTR1/AGTR2	28
GO:0006069	ethanol oxidation	10/341	12/16672	7.15654e-16	1.99156e-13	1.4001e-13	ALDH1B1/ALDH2/ALDH1A1/ADH1C/ADH4/ADH1B/ADH7/ADH1A/ADH6/ADH5	10
GO:0007189	adenylate cyclase-activating G-protein coupled receptor signaling pathway	20/341	88/16672	8.20001e-16	2.12982e-13	1.49729e-13	ADCY2/ADCY5/ADORA2B/ADCY3/ADRA2A/ADRA1B/ADRA2B/ADRB2/ADCY7/ADRB1/ADCYAP1/ADCY8/ADRA1D/ADCY6/ADCY1/ADRA1A/ADRA2C/ADRB3/ADCY9/ADORA2A	20
GO:0060191	regulation of lipase activity	19/341	78/16672	1.09373e-15	2.66323e-13	1.87229e-13	RHOA/ANG/APOA2/APOH/APOC3/RHOC/ANXA1/APOC1/ABL2/APOC2/ABL1/APOA1/ADRA1A/AGT/ADCYAP1R1/ARF4/APOA4/ARL1/AGTR1	19
GO:0044282	small molecule catabolic process	35/341	335/16672	2.01612e-15	4.45335e-13	3.13078e-13	ALDH1B1/ASL/AKT1/ALDOA/ALDH3A2/AGXT/ACADM/ALDH2/ACTN3/APOE/ACAT2/ARG1/ALDOC/ACACB/ALDH1A1/ABCD1/AKT2/ALDH3B2/ABAT/ACADVL/ACAA1/ALDH3B1/ADH4/ACADSB/ADH7/ACADS/ACADL/ALDOB/AMT/ACAT1/ACOX1/ABCD2/ASPA/ADH5/AHCY	35
GO:0008015	blood circulation	42/341	484/16672	2.0575e-15	4.45335e-13	3.13078e-13	ANGPT1/ABR/ADORA1/AKT1/ADM/ASPH/ADORA2B/ATP1B1/ANK2/AR/ADRA2A/ADRA1B/ATP1B3/ADRA2B/ADRB2/ACTA2/APOE/ATP1A2/ADRB1/ADCYAP1/ABL1/GRK2/ADRA1D/ADCY6/ATP1B2/ADRA1A/ADRA2C/ADA/ATP1A4/ATP1A3/ABAT/AGT/ADRB3/ACVRL1/ADORA2A/ATP1A1/ASIC2/ALOX12/ACTC1/AGTR1/AGTR2/ADH5	42
GO:0003013	circulatory system process	42/341	488/16672	2.74632e-15	5.54029e-13	3.89491e-13	ANGPT1/ABR/ADORA1/AKT1/ADM/ASPH/ADORA2B/ATP1B1/ANK2/AR/ADRA2A/ADRA1B/ATP1B3/ADRA2B/ADRB2/ACTA2/APOE/ATP1A2/ADRB1/ADCYAP1/ABL1/GRK2/ADRA1D/ADCY6/ATP1B2/ADRA1A/ADRA2C/ADA/ATP1A4/ATP1A3/ABAT/AGT/ADRB3/ACVRL1/ADORA2A/ATP1A1/ASIC2/ALOX12/ACTC1/AGTR1/AGTR2/ADH5	42
GO:0090066	regulation of anatomical structure size	41/341	466/16672	2.84409e-15	5.54029e-13	3.89491e-13	AQP8/ADORA1/AQP9/ALOX15/AKT1/AQP2/AQP6/ADM/ADORA2B/ADRA2A/ADD2/ADRA1B/ADRA2B/ADRB2/ACTA2/ANXA7/APOE/ATP1A2/AQP5/ADRB1/ARF1/ADCYAP1/AQP3/ABL1/ADRA1D/ADCY6/ACTN2/ADRA1A/ADRA2C/AGT/ARF6/ADRB3/ARHGAP4/ADD1/AQP4/ASIC2/AQP7/AQP1/ALOX12/AGTR1/AGTR2	41
GO:0009992	cellular water homeostasis	10/341	13/16672	3.04517e-15	5.64952e-13	3.9717e-13	AQP8/AQP9/AQP2/AQP6/ANXA7/AQP5/AQP3/AQP4/AQP7/AQP1	10
GO:0009150	purine ribonucleotide metabolic process	42/341	496/16672	4.84801e-15	8.58539e-13	6.03566e-13	ADSL/ADSS/ADCY2/ALDOA/ADM/APLP1/ADCY5/ADORA2B/ADCY3/ATP1B1/AK1/ADRA2A/ADRB2/ACTN3/APOE/ADCY7/ATP1A2/AK4/ADRB1/ADCYAP1/ADCY8/ALDOC/ARNT/ADCY6/ADCY1/ABCA1/ACR/APRT/ADCYAP1R1/AMPD2/ADK/ADRB3/AMPD1/AK2/ADCY9/ADORA2A/AMPD3/ALDOB/ACAT1/AQP1/PARP1/ATIC	42
GO:0048871	multicellular organismal homeostasis	34/341	326/16672	5.4777e-15	9.27874e-13	6.52309e-13	ADORA1/ACTG1/ADCY2/ADAM8/AQP2/ADCY5/ADCY3/ALB/SERPINA3/ADRB2/ALOX12B/ADCY7/ADRB1/ADCY8/AQP3/ACP5/ACACB/ABCA4/ADCY6/ADCY1/ABAT/ACADVL/AMPD2/ACTB/ACACA/ADRB3/ACADL/ADD1/ADCY9/AKR1B1/AMPD3/AQP4/AQP1/ALOX12	34
GO:0007190	activation of adenylate cyclase activity	14/341	37/16672	6.86804e-15	1.11491e-12	7.838e-13	ADCY2/ADCY5/ADORA2B/ADCY3/ADRB2/ADCY7/ADRB1/ADCYAP1/ADCY8/ADCY6/ADCY1/ACR/ADRB3/ADCY9	14
GO:0045762	positive regulation of adenylate cyclase activity	15/341	46/16672	9.73582e-15	1.51723e-12	1.06664e-12	ADCY2/ADCY5/ADORA2B/ADCY3/ADRB2/ADCY7/ADRB1/ADCYAP1/ADCY8/ADCY6/ADCY1/ACR/ADRB3/ADCY9/ADORA2A	15
GO:0030819	positive regulation of cAMP biosynthetic process	18/341	76/16672	1.07213e-14	1.60655e-12	1.12943e-12	ADCY2/ADM/ADCY5/ADORA2B/ADCY3/ADRB2/ADCY7/ADRB1/ADCYAP1/ADCY8/ADCY6/ADCY1/ABCA1/ACR/ADCYAP1R1/ADRB3/ADCY9/ADORA2A	18
GO:0052652	cyclic purine nucleotide metabolic process	23/341	143/16672	1.61669e-14	2.33283e-12	1.64001e-12	ADCY2/ADM/APLP1/ADCY5/ADORA2B/ADCY3/ADRA2A/ADRB2/APOE/ADCY7/ADRB1/ADCYAP1/ADCY8/ADCY6/ADCY1/ABCA1/ACR/ADCYAP1R1/AMPD2/ADRB3/ADCY9/ADORA2A/AQP1	23
GO:0044057	regulation of system process	41/341	492/16672	1.81445e-14	2.52467e-12	1.77488e-12	ADORA1/AKT1/ADM/APOA2/ASPH/ADORA2B/ATP1B1/ANK2/ACPP/ADRA2A/AIF1/ADRA1B/ATP1B3/ADRA2B/ADRB2/ACTN3/ATP1A2/ADRB1/ADCYAP1/ABL1/GRK2/ADRA1D/APOA1/ADCY6/ATP1B2/ADRA1A/ADRA2C/ADA/ATP1A4/ATP1A3/ABAT/AGT/ANXA6/APOA4/ATP1A1/ASIC2/AQP1/PARP1/ALOX12/AGTR1/AGTR2	41
GO:0009190	cyclic nucleotide biosynthetic process	23/341	144/16672	1.88869e-14	2.53735e-12	1.7838e-12	ADCY2/ADM/APLP1/ADCY5/ADORA2B/ADCY3/ADRA2A/ADRB2/APOE/ADCY7/ADRB1/ADCYAP1/ADCY8/ADCY6/ADCY1/ABCA1/ACR/ADCYAP1R1/AMPD2/ADRB3/ADCY9/ADORA2A/AQP1	23
GO:0030804	positive regulation of cyclic nucleotide biosynthetic process	19/341	94/16672	4.3631e-14	5.66621e-12	3.98343e-12	ADCY2/ADM/ADCY5/ADORA2B/ADCY3/ADRB2/APOE/ADCY7/ADRB1/ADCYAP1/ADCY8/ADCY6/ADCY1/ABCA1/ACR/ADCYAP1R1/ADRB3/ADCY9/ADORA2A	19
GO:0030816	positive regulation of cAMP metabolic process	18/341	83/16672	5.61547e-14	7.05737e-12	4.96144e-12	ADCY2/ADM/ADCY5/ADORA2B/ADCY3/ADRB2/ADCY7/ADRB1/ADCYAP1/ADCY8/ADCY6/ADCY1/ABCA1/ACR/ADCYAP1R1/ADRB3/ADCY9/ADORA2A	18
GO:0030817	regulation of cAMP biosynthetic process	20/341	109/16672	6.49607e-14	7.90897e-12	5.56013e-12	ADCY2/ADM/APLP1/ADCY5/ADORA2B/ADCY3/ADRA2A/ADRB2/ADCY7/ADRB1/ADCYAP1/ADCY8/ADCY6/ADCY1/ABCA1/ACR/ADCYAP1R1/ADRB3/ADCY9/ADORA2A	20
GO:0050878	regulation of body fluid levels	40/341	495/16672	1.06723e-13	1.15235e-11	8.10122e-12	ADORA1/ACTG1/ADCY2/AKT1/RHOA/AQP2/APOH/ADCY5/ADCY3/ANXA5/ADRA2A/APLNR/ADRA2B/ANXA7/APOE/ALOX12B/ADCY7/AQP5/ADCY8/AQP3/ANXA2/ADCY6/ADCY1/RHOG/APRT/ADRA2C/ADA/ABAT/A2M/ACTB/SERPINC1/ADCY9/RHOB/ADORA2A/AQP4/ARRB2/ASIC2/AQP1/ALOX12/ARRB1	40
GO:0045981	positive regulation of nucleotide metabolic process	21/341	126/16672	1.11273e-13	1.15235e-11	8.10122e-12	ADCY2/ADM/ADCY5/ADORA2B/ADCY3/ADRB2/ACTN3/APOE/ADCY7/ADRB1/ADCYAP1/ADCY8/ARNT/ADCY6/ADCY1/ABCA1/ACR/ADCYAP1R1/ADRB3/ADCY9/ADORA2A	21
GO:1900544	positive regulation of purine nucleotide metabolic process	21/341	126/16672	1.11273e-13	1.15235e-11	8.10122e-12	ADCY2/ADM/ADCY5/ADORA2B/ADCY3/ADRB2/ACTN3/APOE/ADCY7/ADRB1/ADCYAP1/ADCY8/ARNT/ADCY6/ADCY1/ABCA1/ACR/ADCYAP1R1/ADRB3/ADCY9/ADORA2A	21
GO:0006171	cAMP biosynthetic process	20/341	112/16672	1.11518e-13	1.15235e-11	8.10122e-12	ADCY2/ADM/APLP1/ADCY5/ADORA2B/ADCY3/ADRA2A/ADRB2/ADCY7/ADRB1/ADCYAP1/ADCY8/ADCY6/ADCY1/ABCA1/ACR/ADCYAP1R1/ADRB3/ADCY9/ADORA2A	20
GO:0034308	primary alcohol metabolic process	14/341	44/16672	1.13595e-13	1.15235e-11	8.10122e-12	ALDH1B1/ALDH3A2/ALDH1A3/ALDH2/ALDH1A1/ALDH3B2/ADH1C/ALDH3B1/ADH4/ADH1B/ADH7/ADH1A/ADH6/ADH5	14
GO:0015793	glycerol transport	9/341	12/16672	1.17613e-13	1.15235e-11	8.10122e-12	AQP8/AQP9/AQP2/AQP6/AQP5/AQP3/AQP4/AQP7/AQP1	9
GO:0030810	positive regulation of nucleotide biosynthetic process	19/341	99/16672	1.18311e-13	1.15235e-11	8.10122e-12	ADCY2/ADM/ADCY5/ADORA2B/ADCY3/ADRB2/APOE/ADCY7/ADRB1/ADCYAP1/ADCY8/ADCY6/ADCY1/ABCA1/ACR/ADCYAP1R1/ADRB3/ADCY9/ADORA2A	19
GO:1900373	positive regulation of purine nucleotide biosynthetic process	19/341	99/16672	1.18311e-13	1.15235e-11	8.10122e-12	ADCY2/ADM/ADCY5/ADORA2B/ADCY3/ADRB2/APOE/ADCY7/ADRB1/ADCYAP1/ADCY8/ADCY6/ADCY1/ABCA1/ACR/ADCYAP1R1/ADRB3/ADCY9/ADORA2A	19
GO:0071825	protein-lipid complex subunit organization	13/341	36/16672	1.32116e-13	1.23208e-11	8.66169e-12	APOA2/APOC3/APOC1/APOE/ARF1/APOC2/APOA1/ABCA1/AGT/APOB/APOA4/BIN1/AGTR1	13
GO:0007187	G-protein coupled receptor signaling pathway, coupled to cyclic nucleotide second messenger	25/341	190/16672	1.32821e-13	1.23208e-11	8.66169e-12	ADORA1/ADCY2/APLP1/ADCY5/ADORA2B/ADCY3/ADRA2A/ADRA1B/ANXA1/ADRA2B/ADRB2/ADCY7/ADRB1/ADCYAP1/ADCY8/ADRA1D/ADCY6/ADCY1/ADRA1A/ADRA2C/AGT/ADRB3/ADCY9/ADORA2A/AGTR2	25
GO:0030802	regulation of cyclic nucleotide biosynthetic process	21/341	129/16672	1.80185e-13	1.63256e-11	1.14771e-11	ADCY2/ADM/APLP1/ADCY5/ADORA2B/ADCY3/ADRA2A/ADRB2/APOE/ADCY7/ADRB1/ADCYAP1/ADCY8/ADCY6/ADCY1/ABCA1/ACR/ADCYAP1R1/ADRB3/ADCY9/ADORA2A	21
GO:1903522	regulation of blood circulation	30/341	288/16672	2.44024e-13	2.16072e-11	1.51902e-11	ADORA1/AKT1/ADM/ASPH/ATP1B1/ANK2/ADRA2A/ADRA1B/ATP1B3/ADRA2B/ADRB2/ATP1A2/ADRB1/ADCYAP1/ABL1/GRK2/ADRA1D/ADCY6/ATP1B2/ADRA1A/ADRA2C/ADA/ATP1A4/ATP1A3/AGT/ATP1A1/ASIC2/ALOX12/AGTR1/AGTR2	30
GO:0030801	positive regulation of cyclic nucleotide metabolic process	19/341	103/16672	2.51713e-13	2.17927e-11	1.53206e-11	ADCY2/ADM/ADCY5/ADORA2B/ADCY3/ADRB2/APOE/ADCY7/ADRB1/ADCYAP1/ADCY8/ADCY6/ADCY1/ABCA1/ACR/ADCYAP1R1/ADRB3/ADCY9/ADORA2A	19
GO:0045761	regulation of adenylate cyclase activity	16/341	68/16672	3.70601e-13	3.13883e-11	2.20664e-11	ADCY2/ADCY5/ADORA2B/ADCY3/ADRA2A/ADRB2/ADCY7/ADRB1/ADCYAP1/ADCY8/ADCY6/ADCY1/ACR/ADRB3/ADCY9/ADORA2A	16
GO:0044242	cellular lipid catabolic process	24/341	183/16672	4.47017e-13	3.68557e-11	2.59101e-11	AKT1/ALDH3A2/APOA2/APOC3/ACADM/ADRB2/APOE/ACAT2/APOC2/ACACB/APOA1/ABCD1/AKT2/ACADVL/AADAC/ACAA1/ACADSB/APOB/APOA4/ACADS/ACADL/ACAT1/ACOX1/ABCD2	24
GO:1900371	regulation of purine nucleotide biosynthetic process	21/341	135/16672	4.54075e-13	3.68557e-11	2.59101e-11	ADCY2/ADM/APLP1/ADCY5/ADORA2B/ADCY3/ADRA2A/ADRB2/APOE/ADCY7/ADRB1/ADCYAP1/ADCY8/ADCY6/ADCY1/ABCA1/ACR/ADCYAP1R1/ADRB3/ADCY9/ADORA2A	21
GO:0030808	regulation of nucleotide biosynthetic process	21/341	136/16672	5.27125e-13	4.19118e-11	2.94647e-11	ADCY2/ADM/APLP1/ADCY5/ADORA2B/ADCY3/ADRA2A/ADRB2/APOE/ADCY7/ADRB1/ADCYAP1/ADCY8/ADCY6/ADCY1/ABCA1/ACR/ADCYAP1R1/ADRB3/ADCY9/ADORA2A	21
GO:0031281	positive regulation of cyclase activity	15/341	59/16672	5.96724e-13	4.55851e-11	3.2047e-11	ADCY2/ADCY5/ADORA2B/ADCY3/ADRB2/ADCY7/ADRB1/ADCYAP1/ADCY8/ADCY6/ADCY1/ACR/ADRB3/ADCY9/ADORA2A	15
GO:0051349	positive regulation of lyase activity	15/341	59/16672	5.96724e-13	4.55851e-11	3.2047e-11	ADCY2/ADCY5/ADORA2B/ADCY3/ADRB2/ADCY7/ADRB1/ADCYAP1/ADCY8/ADCY6/ADCY1/ACR/ADRB3/ADCY9/ADORA2A	15
GO:0006883	cellular sodium ion homeostasis	10/341	19/16672	8.81762e-13	6.48178e-11	4.55679e-11	ATP1B1/ATP12A/ATP1B3/ATP1A2/ATP1B2/ATP1A4/ATP1A3/AGT/ATP1A1/AGTR2	10
GO:0071880	adenylate cyclase-activating adrenergic receptor signaling pathway	10/341	19/16672	8.81762e-13	6.48178e-11	4.55679e-11	ADRA2A/ADRA1B/ADRA2B/ADRB2/ADRB1/ADRA1D/ADRA1A/ADRA2C/ADRB3/ADCY9	10
GO:0030814	regulation of cAMP metabolic process	20/341	125/16672	9.60982e-13	6.93331e-11	4.87422e-11	ADCY2/ADM/APLP1/ADCY5/ADORA2B/ADCY3/ADRA2A/ADRB2/ADCY7/ADRB1/ADCYAP1/ADCY8/ADCY6/ADCY1/ABCA1/ACR/ADCYAP1R1/ADRB3/ADCY9/ADORA2A	20
GO:0033700	phospholipid efflux	9/341	14/16672	1.03225e-12	7.18152e-11	5.04872e-11	APOA2/ABCA2/APOC3/APOC1/APOE/APOC2/APOA1/ABCA1/APOA4	9
GO:0046033	AMP metabolic process	9/341	14/16672	1.03225e-12	7.18152e-11	5.04872e-11	ADSL/ADSS/AK1/AK4/APRT/AMPD2/ADK/AK2/AMPD3	9
GO:0034440	lipid oxidation	18/341	99/16672	1.40452e-12	9.60001e-11	6.74896e-11	AKT1/ALDH3A2/ACADM/APOD/ACAT2/ACACB/ABCD1/AKT2/ACADVL/ACAA1/ACADSB/ADH7/ACADS/ACADL/ACAT1/ACOX1/ALOX12/ABCD2	18
GO:0050994	regulation of lipid catabolic process	14/341	52/16672	1.50788e-12	1.01288e-10	7.1207e-11	ADORA1/AKT1/APOA2/APOC3/ADRA2A/ADRB2/APOC1/APOC2/ACACB/APOA1/AKT2/AADAC/APOA4/ABCD2	14
GO:0003091	renal water homeostasis	12/341	34/16672	1.61918e-12	1.05139e-10	7.3914e-11	ADCY2/AQP2/ADCY5/ADCY3/ADCY7/ADCY8/AQP3/ADCY6/ADCY1/ADCY9/AQP4/AQP1	12
GO:0071827	plasma lipoprotein particle organization	12/341	34/16672	1.61918e-12	1.05139e-10	7.3914e-11	APOA2/APOC3/APOC1/APOE/ARF1/APOC2/APOA1/ABCA1/AGT/APOB/APOA4/AGTR1	12
GO:0009991	response to extracellular stimulus	35/341	420/16672	1.70779e-12	1.09074e-10	7.6681e-11	ACTA1/ADSL/ASS1/ALDH3A1/AKT1/AQP2/ADM/ATF4/ADORA2B/ALB/AIF1/ADRB2/APOE/ADRB1/APAF1/ADCYAP1/ASNS/ARG1/AQP3/ARSB/ACACB/ALPL/AOC1/APOA1/AES/ABCA1/ADA/ADRB3/ASCL1/SERPINC1/ALAD/ACAT1/ATF3/ASGR1/AHCY	35
GO:0007188	adenylate cyclase-modulating G-protein coupled receptor signaling pathway	22/341	164/16672	2.72598e-12	1.71297e-10	1.20425e-10	ADORA1/ADCY2/APLP1/ADCY5/ADORA2B/ADCY3/ADRA2A/ADRA1B/ADRA2B/ADRB2/ADCY7/ADRB1/ADCYAP1/ADCY8/ADRA1D/ADCY6/ADCY1/ADRA1A/ADRA2C/ADRB3/ADCY9/ADORA2A	22
GO:0009187	cyclic nucleotide metabolic process	23/341	183/16672	3.43472e-12	2.12407e-10	1.49326e-10	ADCY2/ADM/APLP1/ADCY5/ADORA2B/ADCY3/ADRA2A/ADRB2/APOE/ADCY7/ADRB1/ADCYAP1/ADCY8/ADCY6/ADCY1/ABCA1/ACR/ADCYAP1R1/AMPD2/ADRB3/ADCY9/ADORA2A/AQP1	23
GO:0006884	cell volume homeostasis	11/341	28/16672	3.51406e-12	2.13918e-10	1.50388e-10	AQP8/AQP9/AQP2/AQP6/ANXA7/AQP5/AQP3/ADD1/AQP4/AQP7/AQP1	11
GO:0010035	response to inorganic substance	36/341	455/16672	3.69151e-12	2.2036e-10	1.54916e-10	ACTA1/ACO1/ASS1/APP/AQP9/ALOX15/AANAT/AQP2/ATF4/ALOX5AP/ANXA1/ANXA7/ANK3/ARG1/AQP3/ANXA11/ABL1/APBB1/AOC1/ADCY1/FAS/APOBEC1/ADA/ABAT/APEX1/AREG/ASCL1/ALAD/APOB/APOA4/RHOB/AKR1B1/AQP1/PARP1/ATIC/ATF1	36
GO:0030799	regulation of cyclic nucleotide metabolic process	21/341	150/16672	3.73299e-12	2.2036e-10	1.54916e-10	ADCY2/ADM/APLP1/ADCY5/ADORA2B/ADCY3/ADRA2A/ADRB2/APOE/ADCY7/ADRB1/ADCYAP1/ADCY8/ADCY6/ADCY1/ABCA1/ACR/ADCYAP1R1/ADRB3/ADCY9/ADORA2A	21
GO:1901615	organic hydroxy compound metabolic process	34/341	409/16672	3.87785e-12	2.25494e-10	1.58526e-10	APP/ASIP/ALDH1B1/APOF/ALOX15/ALDH3A2/APOA2/ALDH1A3/ALDH2/APOC1/APOE/AOC2/APOA1/ABCA1/ALDH1A1/ALDH3B2/ADH1C/ABAT/ACADVL/ADCYAP1R1/ALDH3B1/ADH4/ADH1B/ADH7/APOB/APOA4/ADH1A/ACADL/AKR1B1/ADH6/ACLY/ALOX12/AGTR2/ADH5	34
GO:0036376	sodium ion export from cell	8/341	11/16672	4.41647e-12	2.53038e-10	1.77889e-10	ATP1B1/ATP12A/ATP1B3/ATP1A2/ATP1B2/ATP1A4/ATP1A3/ATP1A1	8
GO:0006066	alcohol metabolic process	28/341	282/16672	5.096e-12	2.87739e-10	2.02285e-10	APP/ALDH1B1/APOF/ALDH3A2/APOA2/ALDH1A3/ALDH2/APOC1/APOE/APOA1/ABCA1/ALDH1A1/ALDH3B2/ADH1C/ACADVL/ADCYAP1R1/ALDH3B1/ADH4/ADH1B/ADH7/APOB/APOA4/ADH1A/ACADL/AKR1B1/ADH6/ACLY/ADH5	28
GO:0065005	protein-lipid complex assembly	10/341	22/16672	5.84425e-12	3.25274e-10	2.28673e-10	APOA2/APOC3/APOC1/APOE/ARF1/APOA1/ABCA1/APOB/APOA4/BIN1	10
GO:0003014	renal system process	18/341	108/16672	6.5828e-12	3.6122e-10	2.53943e-10	ADORA1/ADCY2/AQP2/ADCY5/ADCY3/ADCY7/ADCY8/AQP3/ADCY6/ADCY1/FAS/ADRA1A/AGT/ADCY9/AQP4/AQP1/AGTR1/AGTR2	18
GO:0050891	multicellular organismal water homeostasis	14/341	58/16672	7.73906e-12	4.18769e-10	2.94401e-10	ADCY2/AQP2/ADCY5/ADCY3/ALOX12B/ADCY7/ADCY8/AQP3/ADCY6/ADCY1/ADCY9/AQP4/AQP1/ALOX12	14
GO:0046058	cAMP metabolic process	20/341	141/16672	9.61983e-12	5.13409e-10	3.60934e-10	ADCY2/ADM/APLP1/ADCY5/ADORA2B/ADCY3/ADRA2A/ADRB2/ADCY7/ADRB1/ADCYAP1/ADCY8/ADCY6/ADCY1/ABCA1/ACR/ADCYAP1R1/ADRB3/ADCY9/ADORA2A	20
GO:0031279	regulation of cyclase activity	16/341	83/16672	9.87631e-12	5.19915e-10	3.65509e-10	ADCY2/ADCY5/ADORA2B/ADCY3/ADRA2A/ADRB2/ADCY7/ADRB1/ADCYAP1/ADCY8/ADCY6/ADCY1/ACR/ADRB3/ADCY9/ADORA2A	16
GO:0016042	lipid catabolic process	28/341	290/16672	1.00086e-11	5.19915e-10	3.65509e-10	ADORA1/AKT1/ALDH3A2/APOA2/APOC3/ADRA2A/ACADM/ADRB2/APOC1/APOE/ACAT2/APOC2/ACACB/APOA1/ABCD1/AKT2/ACADVL/AADAC/ACAA1/ACADSB/APOB/APOA4/ACADS/ACADL/STS/ACAT1/ACOX1/ABCD2	28
GO:0019395	fatty acid oxidation	17/341	97/16672	1.10582e-11	5.6688e-10	3.98525e-10	AKT1/ALDH3A2/ACADM/ACAT2/ACACB/ABCD1/AKT2/ACADVL/ACAA1/ACADSB/ADH7/ACADS/ACADL/ACAT1/ACOX1/ALOX12/ABCD2	17
GO:0006869	lipid transport	29/341	313/16672	1.16622e-11	5.90078e-10	4.14834e-10	AQP9/APOF/AKT1/APOA2/APOH/ABCA2/PLIN2/APOC3/ALB/ANXA1/APOD/ABCA3/APOC1/APOE/APOC4/APOC2/ACACB/ABCA4/APOA1/ABCA1/ABCD1/AKT2/AGT/ACACA/APOB/APOA4/ABCD2/AGTR1/AGTR2	29
GO:0015791	polyol transport	9/341	17/16672	1.18727e-11	5.90628e-10	4.15221e-10	AQP8/AQP9/AQP2/AQP6/AQP5/AQP3/AQP4/AQP7/AQP1	9
GO:0051339	regulation of lyase activity	16/341	84/16672	1.19763e-11	5.90628e-10	4.15221e-10	ADCY2/ADCY5/ADORA2B/ADCY3/ADRA2A/ADRB2/ADCY7/ADRB1/ADCYAP1/ADCY8/ADCY6/ADCY1/ACR/ADRB3/ADCY9/ADORA2A	16
GO:0030007	cellular potassium ion homeostasis	8/341	12/16672	1.30142e-11	6.33791e-10	4.45564e-10	ATP1B1/ATP12A/ATP1B3/ATP1A2/ATP1B2/ATP1A4/ATP1A3/ATP1A1	8
GO:0034367	macromolecular complex remodeling	10/341	24/16672	1.70918e-11	8.01324e-10	5.63343e-10	APOA2/APOC3/APOC1/APOE/APOC2/APOA1/AGT/APOB/APOA4/AGTR1	10
GO:0034368	protein-lipid complex remodeling	10/341	24/16672	1.70918e-11	8.01324e-10	5.63343e-10	APOA2/APOC3/APOC1/APOE/APOC2/APOA1/AGT/APOB/APOA4/AGTR1	10
GO:0034369	plasma lipoprotein particle remodeling	10/341	24/16672	1.70918e-11	8.01324e-10	5.63343e-10	APOA2/APOC3/APOC1/APOE/APOC2/APOA1/AGT/APOB/APOA4/AGTR1	10
GO:0044283	small molecule biosynthetic process	36/341	480/16672	1.7277e-11	8.01324e-10	5.63343e-10	ASS1/ASL/ALOX15/ALDOA/ADM/ATF4/APOC3/AGXT/ALOX5AP/ALDH1A3/ANXA1/APOC1/APOE/ALOX12B/ASNS/APOC2/ALDOC/ACACB/APOA1/ALOX15B/ABAT/ACADVL/ADCYAP1R1/ALOX5/ACACA/APOB/APOA4/ACADL/AKR1B1/ALDOB/ACAT1/ATF3/ACLY/ALOX12/ASPA/AHCY	36
GO:1900542	regulation of purine nucleotide metabolic process	23/341	199/16672	1.98045e-11	9.07747e-10	6.3816e-10	ADCY2/ADM/APLP1/ADCY5/ADORA2B/ADCY3/ADRA2A/ADRB2/ACTN3/APOE/ADCY7/ADRB1/ADCYAP1/ADCY8/ARNT/ADCY6/ADCY1/ABCA1/ACR/ADCYAP1R1/ADRB3/ADCY9/ADORA2A	23
GO:0060193	positive regulation of lipase activity	14/341	62/16672	2.06076e-11	9.33571e-10	6.56315e-10	RHOA/ANG/APOH/RHOC/ABL2/APOC2/APOA1/ADRA1A/AGT/ADCYAP1R1/ARF4/APOA4/ARL1/AGTR1	14
GO:0010248	establishment or maintenance of transmembrane electrochemical gradient	8/341	13/16672	3.32362e-11	1.47146e-09	1.03446e-09	ATP1B1/ATP12A/ATP1B3/ATP1A2/ATP1B2/ATP1A4/ATP1A3/ATP1A1	8
GO:0071436	sodium ion export	8/341	13/16672	3.32362e-11	1.47146e-09	1.03446e-09	ATP1B1/ATP12A/ATP1B3/ATP1A2/ATP1B2/ATP1A4/ATP1A3/ATP1A1	8
GO:0006140	regulation of nucleotide metabolic process	23/341	206/16672	4.03648e-11	1.76698e-09	1.24221e-09	ADCY2/ADM/APLP1/ADCY5/ADORA2B/ADCY3/ADRA2A/ADRB2/ACTN3/APOE/ADCY7/ADRB1/ADCYAP1/ADCY8/ARNT/ADCY6/ADCY1/ABCA1/ACR/ADCYAP1R1/ADRB3/ADCY9/ADORA2A	23
GO:0071875	adrenergic receptor signaling pathway	10/341	26/16672	4.46357e-11	1.93223e-09	1.35839e-09	ADRA2A/ADRA1B/ADRA2B/ADRB2/ADRB1/ADRA1D/ADRA1A/ADRA2C/ADRB3/ADCY9	10
GO:0006631	fatty acid metabolic process	30/341	357/16672	5.86577e-11	2.51132e-09	1.7655e-09	ALOX15/AKT1/ALDH3A2/APOC3/ALOX5AP/ACADM/ANXA1/APOC1/ALOX12B/ACAT2/APOC2/ACACB/APOA1/ABCD1/ALOX15B/AKT2/ACADVL/ALOX5/ACACA/ACAA1/ACADSB/ADH7/APOA4/ACADS/ACADL/ACAT1/ACOX1/ACLY/ALOX12/ABCD2	30
GO:0055088	lipid homeostasis	18/341	123/16672	6.27914e-11	2.65908e-09	1.86937e-09	ASGR2/APOA2/ABCA2/APOC3/ACADM/APOE/APOC4/APOC2/APOA1/ABCA1/ACADVL/AMPD2/ACACA/ACADSB/APOB/APOA4/ACADS/ACADL	18
GO:0034377	plasma lipoprotein particle assembly	9/341	20/16672	7.77005e-11	3.25507e-09	2.28836e-09	APOA2/APOC3/APOC1/APOE/ARF1/APOA1/ABCA1/APOB/APOA4	9
GO:0003012	muscle system process	31/341	385/16672	8.16349e-11	3.38351e-09	2.37866e-09	ACTA1/ACTG2/ADORA1/ALDOA/ASPH/ADORA2B/ATP1B1/ANK2/ADRA2A/AIF1/ADRA1B/ARG2/ADRA2B/ADRB2/ACTA2/ACTN3/ATP1A2/GRK2/ADRA1D/ACTN2/ADRA1A/ADRA2C/ADA/ATP1A3/ABAT/AGT/ANXA6/ATP1A1/PARP1/ACTC1/AGTR2	31
GO:0006936	muscle contraction	28/341	319/16672	9.57974e-11	3.9287e-09	2.76194e-09	ACTA1/ACTG2/ADORA1/ALDOA/ASPH/ADORA2B/ATP1B1/ANK2/ADRA2A/ADRA1B/ARG2/ADRA2B/ADRB2/ACTA2/ACTN3/ATP1A2/GRK2/ADRA1D/ACTN2/ADRA1A/ADRA2C/ADA/ATP1A3/ABAT/AGT/ANXA6/ATP1A1/ACTC1	28
GO:0019229	regulation of vasoconstriction	13/341	58/16672	1.20292e-10	4.88184e-09	3.43201e-09	AKT1/ADM/ADRA2A/ADRA1B/ADRA2B/ATP1A2/ABL1/ADRA1D/ADRA1A/ADRA2C/AGT/ASIC2/AGTR1	13
GO:0010876	lipid localization	29/341	347/16672	1.41709e-10	5.69174e-09	4.00138e-09	AQP9/APOF/AKT1/APOA2/APOH/ABCA2/PLIN2/APOC3/ALB/ANXA1/APOD/ABCA3/APOC1/APOE/APOC4/APOC2/ACACB/ABCA4/APOA1/ABCA1/ABCD1/AKT2/AGT/ACACA/APOB/APOA4/ABCD2/AGTR1/AGTR2	29
GO:0006635	fatty acid beta-oxidation	14/341	71/16672	1.44479e-10	5.74378e-09	4.03796e-09	AKT1/ACADM/ACAT2/ACACB/ABCD1/AKT2/ACADVL/ACAA1/ACADSB/ACADS/ACADL/ACAT1/ACOX1/ABCD2	14
GO:0055078	sodium ion homeostasis	12/341	48/16672	1.59076e-10	6.26018e-09	4.40101e-09	ADORA1/ATP1B1/ATP12A/ATP1B3/ATP1A2/ATP1B2/ATP1A4/ATP1A3/AGT/ATP1A1/AGTR1/AGTR2	12
GO:0030258	lipid modification	25/341	262/16672	1.72448e-10	6.71856e-09	4.72325e-09	AKT1/ALDH3A2/APOA2/ACADM/APOD/APOC1/APOE/ACAT2/ACACB/APOA1/ABCD1/AKT2/AGT/ACADVL/ACAA1/ACADSB/ADH7/APOA4/ACADS/ACADL/ACAT1/ACOX1/ALOX12/ABCD2/AGTR1	25
GO:0006833	water transport	9/341	22/16672	2.21947e-10	8.56143e-09	6.01881e-09	AQP8/AQP9/AQP2/AQP6/AQP5/AQP3/AQP4/AQP7/AQP1	9
GO:0042310	vasoconstriction	14/341	74/16672	2.58949e-10	9.89085e-09	6.95342e-09	AKT1/ADM/ADRA2A/ADRA1B/ADRA2B/ACTA2/ATP1A2/ABL1/ADRA1D/ADRA1A/ADRA2C/AGT/ASIC2/AGTR1	14
GO:0007266	Rho protein signal transduction	19/341	151/16672	2.66781e-10	1.00911e-08	7.09418e-09	ABR/RHOA/ARHGDIB/APOC3/ARHGDIA/ADRA2A/APOE/ARHGAP5/ARHGAP6/ARHGDIG/APOA1/ABCA1/RHOG/ADRA1A/ARHGAP1/ARHGAP4/RHOB/ARRB1/AGTR1	19
GO:0016053	organic acid biosynthetic process	25/341	268/16672	2.79304e-10	1.04632e-08	7.35576e-09	ASS1/ASL/ALOX15/APOC3/AGXT/ALOX5AP/ALDH1A3/ANXA1/APOC1/ALOX12B/ASNS/APOC2/ACACB/APOA1/ALOX15B/ABAT/ACADVL/ALOX5/ACACA/APOA4/ACADL/ACLY/ALOX12/ASPA/AHCY	25
GO:0031960	response to corticosteroid	19/341	152/16672	2.99289e-10	1.11051e-08	7.80703e-09	ASS1/ALDH3A1/AANAT/ADM/APOA2/AGXT/AIF1/ANXA1/ABCA3/ANXA3/ADCYAP1/ARG1/ALPL/FAS/AREG/ALAD/AQP1/PARP1/AGTR2	19
GO:0009062	fatty acid catabolic process	15/341	89/16672	3.27739e-10	1.20459e-08	8.46849e-09	AKT1/ALDH3A2/ACADM/ACAT2/ACACB/ABCD1/AKT2/ACADVL/ACAA1/ACADSB/ACADS/ACADL/ACAT1/ACOX1/ABCD2	15
GO:0090257	regulation of muscle system process	21/341	190/16672	3.50906e-10	1.27769e-08	8.98236e-09	ADORA1/ADORA2B/ATP1B1/ANK2/ADRA2A/AIF1/ADRA1B/ADRA2B/ADRB2/ACTN3/ATP1A2/GRK2/ADRA1D/ADRA1A/ADRA2C/ADA/ABAT/AGT/ANXA6/ATP1A1/PARP1	21
GO:0051384	response to glucocorticoid	18/341	137/16672	3.8777e-10	1.39884e-08	9.83408e-09	ASS1/ALDH3A1/AANAT/ADM/APOA2/AGXT/AIF1/ANXA1/ABCA3/ANXA3/ADCYAP1/ARG1/ALPL/FAS/AREG/ALAD/AQP1/AGTR2	18
GO:0010872	regulation of cholesterol esterification	7/341	11/16672	4.33298e-10	1.54874e-08	1.08879e-08	APOA2/APOC1/APOE/APOA1/AGT/APOA4/AGTR1	7
GO:0019216	regulation of lipid metabolic process	25/341	274/16672	4.46182e-10	1.58029e-08	1.11097e-08	ADORA1/AKT1/APOA2/APOC3/SERPINA3/ADRA2A/ANXA1/APOD/ADRB2/APOC1/APOE/ARF1/APOC2/ACACB/APOA1/AKT2/AGT/ACADVL/AADAC/APOB/APOA4/ACADL/ATP1A1/ABCD2/AGTR1	25
GO:0046394	carboxylic acid biosynthetic process	24/341	253/16672	4.55869e-10	1.60006e-08	1.12487e-08	ASS1/ASL/ALOX15/APOC3/AGXT/ALOX5AP/ALDH1A3/ANXA1/APOC1/ALOX12B/ASNS/APOC2/ACACB/APOA1/ALOX15B/ABAT/ACADVL/ALOX5/ACACA/APOA4/ACADL/ACLY/ALOX12/ASPA	24
GO:0072329	monocarboxylic acid catabolic process	16/341	106/16672	4.60099e-10	1.60049e-08	1.12517e-08	AKT1/ALDH3A2/AGXT/ACADM/ACAT2/ACACB/ABCD1/AKT2/ACADVL/ACAA1/ACADSB/ACADS/ACADL/ACAT1/ACOX1/ABCD2	16
GO:0010038	response to metal ion	26/341	297/16672	4.86824e-10	1.67846e-08	1.17999e-08	ACTA1/ACO1/ASS1/APP/AQP9/ALOX15/AANAT/AQP2/ATF4/ALOX5AP/ANXA7/ANK3/ARG1/AQP3/ANXA11/APBB1/AOC1/ADCY1/FAS/APOBEC1/ABAT/ASCL1/ALAD/AQP1/PARP1/ATF1	26
GO:0042311	vasodilation	13/341	65/16672	5.50283e-10	1.88062e-08	1.3221e-08	ADORA1/ADM/ADORA2B/ADRB2/APOE/ADRB1/ADCYAP1/ADCY6/AGT/ADRB3/ALOX12/AGTR1/AGTR2	13
GO:0046395	carboxylic acid catabolic process	21/341	195/16672	5.6893e-10	1.92744e-08	1.35502e-08	ASL/AKT1/ALDH3A2/AGXT/ACADM/ACAT2/ARG1/ACACB/ABCD1/AKT2/ABAT/ACADVL/ACAA1/ACADSB/ACADS/ACADL/AMT/ACAT1/ACOX1/ABCD2/ASPA	21
GO:0034199	activation of protein kinase A activity	8/341	17/16672	5.84412e-10	1.96282e-08	1.37989e-08	ADCY2/ADCY5/ADCY3/ADCY7/ADCY8/ADCY6/ADCY1/ADCY9	8
GO:0048545	response to steroid hormone	29/341	369/16672	6.03936e-10	2.01105e-08	1.4138e-08	ACTA1/ASS1/ALDH3A1/AANAT/ADM/APOA2/NR0B1/ABCA2/ARNTL/AGXT/AR/AIF1/ANXA1/ABCA3/ANXA3/ATP1A2/ADCYAP1/ARG1/ALPL/ACR/FAS/ATP1A3/AREG/ALAD/ATP1A1/ARRB2/AQP1/PARP1/AGTR2	29
GO:0042493	response to drug	30/341	397/16672	7.71666e-10	2.54781e-08	1.79115e-08	ASS1/ALDH3A1/AMH/APOA2/ABCA2/PLIN2/ANXA1/APOD/ABCA3/AK4/ARG1/ABL1/ACACB/AOC1/APOA1/ADCY1/ABCA1/PARP4/ABCC6/ADRA1A/APOBEC1/ADA/ATP1A3/ABAT/ADCYAP1R1/APEX1/ALAD/ATP1A1/AQP1/ACTC1	30
GO:0006937	regulation of muscle contraction	18/341	143/16672	7.89881e-10	2.58603e-08	1.81802e-08	ADORA1/ADORA2B/ATP1B1/ANK2/ADRA2A/ADRA1B/ADRA2B/ADRB2/ACTN3/ATP1A2/GRK2/ADRA1D/ADRA1A/ADRA2C/ADA/ABAT/ANXA6/ATP1A1	18
GO:0009127	purine nucleoside monophosphate biosynthetic process	13/341	67/16672	8.19496e-10	2.61701e-08	1.8398e-08	ADSL/ADSS/ALDOA/AK1/AK4/APRT/ADA/AMPD2/ADK/AMPD1/AK2/AMPD3/ATIC	13
GO:0009168	purine ribonucleoside monophosphate biosynthetic process	13/341	67/16672	8.19496e-10	2.61701e-08	1.8398e-08	ADSL/ADSS/ALDOA/AK1/AK4/APRT/ADA/AMPD2/ADK/AMPD1/AK2/AMPD3/ATIC	13
GO:0019935	cyclic-nucleotide-mediated signaling	13/341	67/16672	8.19496e-10	2.61701e-08	1.8398e-08	ADCY2/ADM/ADCY5/ADCY3/APOE/ADCY7/ADRB1/ADCYAP1/ADCY8/ADCY6/ADCY1/ADCYAP1R1/ADCY9	13
GO:0016054	organic acid catabolic process	22/341	221/16672	9.93884e-10	3.14811e-08	2.21317e-08	ASL/AKT1/ALDH3A2/AGXT/ACADM/ACAT2/ARG1/ACACB/ABCD1/AKT2/ABAT/ACADVL/ACAA1/ACADSB/ACADS/ACADL/AMT/ACAT1/ACOX1/ABCD2/ASPA/AHCY	22
GO:0001973	adenosine receptor signaling pathway	7/341	12/16672	1.0217e-09	3.2101e-08	2.25675e-08	ADORA1/ADCY5/ADORA2B/ACPP/ADORA3/ADA/ADORA2A	7
GO:0055075	potassium ion homeostasis	8/341	18/16672	1.03329e-09	3.22055e-08	2.26409e-08	ATP1B1/ATP12A/ATP1B3/ATP1A2/ATP1B2/ATP1A4/ATP1A3/ATP1A1	8
GO:0006940	regulation of smooth muscle contraction	12/341	56/16672	1.10087e-09	3.35077e-08	2.35564e-08	ADORA1/ADORA2B/ADRA2A/ADRA1B/ADRA2B/ADRB2/ATP1A2/ADRA1D/ADRA1A/ADRA2C/ADA/ABAT	12
GO:0019933	cAMP-mediated signaling	12/341	56/16672	1.10087e-09	3.35077e-08	2.35564e-08	ADCY2/ADM/ADCY5/ADCY3/ADCY7/ADRB1/ADCYAP1/ADCY8/ADCY6/ADCY1/ADCYAP1R1/ADCY9	12
GO:0097006	regulation of plasma lipoprotein particle levels	12/341	56/16672	1.10087e-09	3.35077e-08	2.35564e-08	APOA2/APOC3/APOC1/APOE/ARF1/APOC2/APOA1/ABCA1/AGT/APOB/APOA4/AGTR1	12
GO:1903524	positive regulation of blood circulation	14/341	84/16672	1.4986e-09	4.52601e-08	3.18185e-08	AKT1/ADM/ADRA1B/ADRB1/ADCYAP1/ABL1/ADRA1D/ADRA1A/ADRA2C/ADA/AGT/ATP1A1/ALOX12/AGTR2	14
GO:0031667	response to nutrient levels	29/341	390/16672	2.17023e-09	6.50402e-08	4.57243e-08	ADSL/ASS1/ALDH3A1/AKT1/ADM/ATF4/ALB/ADRB2/APOE/ADRB1/APAF1/ADCYAP1/ASNS/ARG1/AQP3/ARSB/ACACB/ALPL/AOC1/APOA1/ABCA1/ADA/ADRB3/ASCL1/SERPINC1/ALAD/ACAT1/ATF3/AHCY	29
GO:0045833	negative regulation of lipid metabolic process	13/341	75/16672	3.52936e-09	1.04965e-07	7.37918e-08	ADORA1/AKT1/APOA2/APOC3/ADRA2A/APOD/APOC1/APOE/APOC2/ACACB/ACADVL/ACADL/ATP1A1	13
GO:0006633	fatty acid biosynthetic process	17/341	139/16672	3.67897e-09	1.08585e-07	7.63371e-08	ALOX15/APOC3/ALOX5AP/ANXA1/APOC1/ALOX12B/APOC2/ACACB/APOA1/ALOX15B/ACADVL/ALOX5/ACACA/APOA4/ACADL/ACLY/ALOX12	17
GO:0042044	fluid transport	9/341	29/16672	3.9381e-09	1.1536e-07	8.10996e-08	AQP8/AQP9/AQP2/AQP6/AQP5/AQP3/AQP4/AQP7/AQP1	9
GO:0071377	cellular response to glucagon stimulus	10/341	39/16672	4.21766e-09	1.21533e-07	8.54396e-08	ASS1/ADCY2/ADCY5/ADCY3/ADCY7/ADCY8/ARG1/ADCY6/ADCY1/ADCY9	10
GO:0034433	steroid esterification	7/341	14/16672	4.27362e-09	1.21533e-07	8.54396e-08	APOA2/APOC1/APOE/APOA1/AGT/APOA4/AGTR1	7
GO:0034434	sterol esterification	7/341	14/16672	4.27362e-09	1.21533e-07	8.54396e-08	APOA2/APOC1/APOE/APOA1/AGT/APOA4/AGTR1	7
GO:0034435	cholesterol esterification	7/341	14/16672	4.27362e-09	1.21533e-07	8.54396e-08	APOA2/APOC1/APOE/APOA1/AGT/APOA4/AGTR1	7
GO:1990267	response to transition metal nanoparticle	16/341	124/16672	4.85948e-09	1.37192e-07	9.64483e-08	ACO1/ASS1/AQP9/AANAT/AQP2/ATF4/ANK2/ARG1/ARSB/APBB1/AOC1/APOBEC1/ABAT/ALAD/AQP1/PARP1	16
GO:0032368	regulation of lipid transport	14/341	92/16672	5.13311e-09	1.43875e-07	1.01146e-07	AKT1/APOA2/ABCA2/APOC3/APOC1/APOE/APOC2/APOA1/ABCA1/AKT2/AGT/APOA4/AGTR1/AGTR2	14
GO:0072330	monocarboxylic acid biosynthetic process	19/341	180/16672	5.34441e-09	1.48049e-07	1.04081e-07	ALOX15/APOC3/AGXT/ALOX5AP/ALDH1A3/ANXA1/APOC1/ALOX12B/APOC2/ACACB/APOA1/ALOX15B/ACADVL/ALOX5/ACACA/APOA4/ACADL/ACLY/ALOX12	19
GO:0006898	receptor-mediated endocytosis	24/341	286/16672	5.35805e-09	1.48049e-07	1.04081e-07	ANGPT1/ASGR2/AP2A1/GRK3/AP2B1/ADM/ACHE/APOC3/AP2A2/ALB/ADRB2/APOC1/APOE/ARF1/APOC2/GRK2/ANXA2/APOA1/ARF6/AMBP/APOB/ARRB2/ASGR1/ARRB1	24
GO:0007588	excretion	12/341	64/16672	5.59121e-09	1.53404e-07	1.07845e-07	ADORA1/AQP9/AQP2/AQP6/ADORA2B/AQP5/AQP3/ADRA1A/AGT/AQP7/AGTR1/AGTR2	12
GO:0006939	smooth muscle contraction	14/341	94/16672	6.84317e-09	1.8644e-07	1.3107e-07	ADORA1/ADORA2B/ADRA2A/ADRA1B/ADRA2B/ADRB2/ACTA2/ATP1A2/ADRA1D/ADRA1A/ADRA2C/ADA/ABAT/AGT	14
GO:0071417	cellular response to organonitrogen compound	31/341	462/16672	6.93216e-09	1.87553e-07	1.31853e-07	ASS1/AQP8/APP/AQP9/ADCY2/AKT1/AANAT/APLP1/ADCY5/ADCY3/AIF1/ADCY7/ADCY8/ARG1/ABL1/AOC1/ADCY6/ADCY1/ACTN2/AKT2/APOBEC1/APRT/AGT/APEX1/ADCY9/AKR1B1/AHSG/AQP1/PARP1/AGTR1/AGTR2	31
GO:0033344	cholesterol efflux	10/341	41/16672	7.17219e-09	1.92709e-07	1.35478e-07	APOA2/ABCA2/APOC3/APOC1/APOE/APOC2/APOA1/ABCA1/APOB/APOA4	10
GO:0009156	ribonucleoside monophosphate biosynthetic process	13/341	80/16672	8.01334e-09	2.13559e-07	1.50135e-07	ADSL/ADSS/ALDOA/AK1/AK4/APRT/ADA/AMPD2/ADK/AMPD1/AK2/AMPD3/ATIC	13
GO:0008217	regulation of blood pressure	18/341	165/16672	8.05779e-09	2.13559e-07	1.50135e-07	ADORA1/AR/ADRA1B/ADRB2/ACTA2/ATP1A2/ADRB1/ADRA1D/ADRA1A/ABAT/AGT/ADRB3/ACVRL1/ATP1A1/ASIC2/AGTR1/AGTR2/ADH5	18
GO:0016101	diterpenoid metabolic process	14/341	96/16672	9.05602e-09	2.38394e-07	1.67594e-07	ALDH3A2/APOA2/APOC3/ALDH1A3/APOE/APOC2/ABCA4/APOA1/ALDH1A1/ADH4/ADH7/APOB/APOA4/ADH5	14
GO:1901655	cellular response to ketone	12/341	67/16672	9.6631e-09	2.52667e-07	1.77629e-07	ASS1/ADCY2/AKT1/ADCY5/ADCY3/ARG1/ADCY6/ADCY1/ACACA/AKR1B1/AQP1/AGTR2	12
GO:0071407	cellular response to organic cyclic compound	32/341	498/16672	1.10701e-08	2.87528e-07	2.02137e-07	ADAR/ASS1/AQP8/APP/AQP9/ADCY2/AKT1/AANAT/APLP1/NR0B1/ADCY5/ADCY3/ARNTL/AR/AIF1/ANXA1/ATP1A2/ADCYAP1/ARG1/ABL1/ALPL/AOC1/ADCY6/ADCY1/ABCA1/ATP1A3/APEX1/ATP1A1/ARRB2/AQP1/PARP1/AGTR2	32
GO:0001666	response to hypoxia	23/341	277/16672	1.37456e-08	3.54654e-07	2.49327e-07	ADSL/ALDH3A1/ADORA1/AKT1/ADAM8/ANG/ADM/ALAS2/ATM/BIRC2/ATP1B1/ACTN4/AGER/APAF1/ANGPT2/ARNT/ASCL2/ADA/ABAT/ACVRL1/ALAD/AQP1/AHCY	23
GO:0070482	response to oxygen levels	24/341	301/16672	1.45556e-08	3.73084e-07	2.62284e-07	ADSL/ALDH3A1/ADORA1/AKT1/ADAM8/ANG/ADM/ALAS2/ATM/BIRC2/ATP1B1/ACTN4/AGER/APAF1/ANGPT2/ARNT/ASCL2/FAS/ADA/ABAT/ACVRL1/ALAD/AQP1/AHCY	24
GO:0019932	second-messenger-mediated signaling	21/341	234/16672	1.53787e-08	3.91605e-07	2.75304e-07	ADCY2/ADM/ADCY5/ADCY3/ATP1B1/ANK2/ACTN3/APOE/ADCY7/ATP1A2/ADRB1/ADCYAP1/ADCY8/ADCY6/ADCY1/ADA/AGT/ADCYAP1R1/ADCY9/AGTR1/AGTR2	21
GO:0043691	reverse cholesterol transport	7/341	17/16672	2.29676e-08	5.81051e-07	4.08488e-07	APOA2/APOC3/APOE/APOC2/APOA1/ABCA1/APOA4	7
GO:0010817	regulation of hormone levels	30/341	460/16672	2.33755e-08	5.85255e-07	4.11443e-07	ADORA1/ACVR2B/AANAT/ADM/ADCY5/ARNTL/ALDH1A3/ADRA2A/ANXA1/ADRA2B/ASMT/ALDH9A1/ADCYAP1/SLC25A6/ARNT/ARL2/ALDH1A1/SLC25A4/ADRA2C/ABAT/AGT/ADH4/ADH7/AKR1B1/ATP1A1/AFP/ARRB1/AGTR1/AGTR2/SLC25A5	30
GO:0036293	response to decreased oxygen levels	23/341	285/16672	2.34342e-08	5.85255e-07	4.11443e-07	ADSL/ALDH3A1/ADORA1/AKT1/ADAM8/ANG/ADM/ALAS2/ATM/BIRC2/ATP1B1/ACTN4/AGER/APAF1/ANGPT2/ARNT/ASCL2/ADA/ABAT/ACVRL1/ALAD/AQP1/AHCY	23
GO:0010517	regulation of phospholipase activity	11/341	59/16672	2.59898e-08	6.44945e-07	4.53406e-07	ANG/ANXA1/ABL2/APOC2/ABL1/ADRA1A/AGT/ADCYAP1R1/ARF4/ARL1/AGTR1	11
GO:0009124	nucleoside monophosphate biosynthetic process	13/341	88/16672	2.63534e-08	6.49829e-07	4.5684e-07	ADSL/ADSS/ALDOA/AK1/AK4/APRT/ADA/AMPD2/ADK/AMPD1/AK2/AMPD3/ATIC	13
GO:0034370	triglyceride-rich lipoprotein particle remodeling	6/341	11/16672	2.96969e-08	7.23118e-07	5.08363e-07	APOA2/APOC3/APOE/APOC2/APOA1/APOA4	6
GO:0034372	very-low-density lipoprotein particle remodeling	6/341	11/16672	2.96969e-08	7.23118e-07	5.08363e-07	APOA2/APOC3/APOE/APOC2/APOA1/APOA4	6
GO:0001523	retinoid metabolic process	13/341	89/16672	3.02991e-08	7.332e-07	5.15451e-07	APOA2/APOC3/ALDH1A3/APOE/APOC2/ABCA4/APOA1/ALDH1A1/ADH4/ADH7/APOB/APOA4/ADH5	13
GO:0050996	positive regulation of lipid catabolic process	8/341	26/16672	3.19743e-08	7.68963e-07	5.40593e-07	APOA2/ADRB2/APOC2/APOA1/AKT2/AADAC/APOA4/ABCD2	8
GO:0006721	terpenoid metabolic process	14/341	106/16672	3.32709e-08	7.95235e-07	5.59062e-07	ALDH3A2/APOA2/APOC3/ALDH1A3/APOE/APOC2/ABCA4/APOA1/ALDH1A1/ADH4/ADH7/APOB/APOA4/ADH5	14
GO:0033762	response to glucagon	10/341	48/16672	3.68494e-08	8.75397e-07	6.15418e-07	ASS1/ADCY2/ADCY5/ADCY3/ADCY7/ADCY8/ARG1/ADCY6/ADCY1/ADCY9	10
GO:0006875	cellular metal ion homeostasis	30/341	473/16672	4.3564e-08	1.02864e-06	7.23148e-07	ACO1/ATOX1/APP/ADM/ALAS2/ADCY5/ATP1B1/ANK2/ADRA1B/ATP12A/ATP1B3/ANXA7/APOE/ATP1A2/ARF1/ADCYAP1/ABL2/ABL1/ADRA1D/ATP1B2/ABCB7/ADRA1A/ATP1A4/ATP1A3/AGT/ADCYAP1R1/ANXA6/ATP1A1/AGTR1/AGTR2	30
GO:0032371	regulation of sterol transport	9/341	38/16672	5.44957e-08	1.27135e-06	8.93778e-07	APOA2/ABCA2/APOC3/APOC1/APOE/APOC2/APOA1/ABCA1/APOA4	9
GO:0032374	regulation of cholesterol transport	9/341	38/16672	5.44957e-08	1.27135e-06	8.93778e-07	APOA2/ABCA2/APOC3/APOC1/APOE/APOC2/APOA1/ABCA1/APOA4	9
GO:1901652	response to peptide	28/341	425/16672	5.66189e-08	1.31302e-06	9.23073e-07	ASS1/ADCY2/AKT1/AANAT/ADM/ADCY5/ADCY3/JAG1/ANXA1/ADCY7/ADCY8/ARG1/AGRP/ADCY6/ADCY1/ACTN2/AKT2/APOBEC1/APRT/AGT/APEX1/AREG/ADCY9/AKR1B1/AHSG/PARP1/AGTR1/AGTR2	28
GO:0019217	regulation of fatty acid metabolic process	12/341	78/16672	5.72053e-08	1.31877e-06	9.27115e-07	AKT1/APOC3/ANXA1/APOC1/APOC2/ACACB/APOA1/AKT2/ACADVL/APOA4/ACADL/ABCD2	12
GO:0010107	potassium ion import	8/341	28/16672	6.13796e-08	1.40668e-06	9.88915e-07	ATP1B1/ATP12A/ATP1B3/ATP1A2/ATP1B2/ATP1A4/ATP1A3/ATP1A1	8
GO:0051051	negative regulation of transport	28/341	430/16672	7.23819e-08	1.64912e-06	1.15936e-06	ANGPT1/ABR/ADORA1/AKT1/APOA2/ATF4/APOC3/ADRA2A/ANXA1/APOD/ADRA2B/APOC1/ATP1A2/ANK3/ADCYAP1/APOC2/ANXA2/APOA1/ACTN2/AKT2/ADRA2C/ADA/ABAT/ANXA4/ARF6/ASIC1/AGTR2/SLC25A5	28
GO:0019372	lipoxygenase pathway	6/341	13/16672	1.06541e-07	2.38554e-06	1.67707e-06	ALOX15/ALOX5AP/ALOX12B/ALOX15B/ALOX5/ALOX12	6
GO:0043173	nucleotide salvage	6/341	13/16672	1.06541e-07	2.38554e-06	1.67707e-06	APRT/ADA/AMPD2/ADK/AMPD1/AMPD3	6
GO:0046040	IMP metabolic process	6/341	13/16672	1.06541e-07	2.38554e-06	1.67707e-06	ADSL/ADSS/AMPD2/AMPD1/AMPD3/ATIC	6
GO:0009167	purine ribonucleoside monophosphate metabolic process	21/341	264/16672	1.23647e-07	2.75274e-06	1.93522e-06	ADSL/ADSS/ALDOA/ATP1B1/AK1/ACTN3/ATP1A2/AK4/ADCYAP1/ALDOC/ARNT/APRT/ADA/AMPD2/ADK/AMPD1/AK2/AMPD3/ALDOB/PARP1/ATIC	21
GO:0009126	purine nucleoside monophosphate metabolic process	21/341	265/16672	1.3182e-07	2.91802e-06	2.05141e-06	ADSL/ADSS/ALDOA/ATP1B1/AK1/ACTN3/ATP1A2/AK4/ADCYAP1/ALDOC/ARNT/APRT/ADA/AMPD2/ADK/AMPD1/AK2/AMPD3/ALDOB/PARP1/ATIC	21
GO:0003073	regulation of systemic arterial blood pressure	12/341	84/16672	1.33341e-07	2.93502e-06	2.06336e-06	ADORA1/AR/ADRA1B/ADRB2/ADRB1/ADRA1D/ADRA1A/AGT/ADRB3/ASIC2/AGTR1/AGTR2	12
GO:0043434	response to peptide hormone	26/341	390/16672	1.36119e-07	2.97932e-06	2.09451e-06	ASS1/ADCY2/AKT1/AANAT/ADM/ADCY5/ADCY3/ANXA1/ADCY7/ADCY8/ARG1/AGRP/ADCY6/ADCY1/ACTN2/AKT2/APOBEC1/APRT/AGT/APEX1/AREG/ADCY9/AHSG/PARP1/AGTR1/AGTR2	26
GO:0032147	activation of protein kinase activity	22/341	292/16672	1.59953e-07	3.48143e-06	2.4475e-06	ANGPT1/ADORA1/ACVR2B/ADCY2/ADAM8/ANG/ADCY5/ADORA2B/ADCY3/ADRA2A/ADRA2B/ADRB2/ADCY7/ADCY8/ABL1/ALK/ADCY6/ADCY1/ADRA2C/AGT/ADCY9/ARRB1	22
GO:0051346	negative regulation of hydrolase activity	26/341	394/16672	1.66245e-07	3.59828e-06	2.52965e-06	RHOH/APP/AKT1/APOA2/BIRC2/APOC3/BIRC3/SERPINA3/ANXA1/APOC1/ADCYAP1/ABL1/ARL2/APOA1/BIRC5/AGT/APLP2/APCS/A2M/AMBP/SERPINC1/AHSG/ARRB2/AQP1/XIAP/ARRB1	26
GO:0050995	negative regulation of lipid catabolic process	7/341	22/16672	1.84403e-07	3.96926e-06	2.79045e-06	ADORA1/AKT1/APOA2/APOC3/ADRA2A/APOC1/ACACB	7
GO:0007193	adenylate cyclase-inhibiting G-protein coupled receptor signaling pathway	11/341	71/16672	1.91037e-07	4.08945e-06	2.87495e-06	ADORA1/ADCY2/APLP1/ADCY5/ADCY3/ADRA2A/ADCY7/ADCY8/ADCY6/ADCY1/ADCY9	11
GO:0045834	positive regulation of lipid metabolic process	14/341	122/16672	2.00434e-07	4.26716e-06	2.99988e-06	AKT1/APOA2/ANXA1/ADRB2/APOC1/APOE/APOC2/APOA1/AKT2/AGT/AADAC/APOA4/ABCD2/AGTR1	14
GO:0042312	regulation of vasodilation	9/341	44/16672	2.12718e-07	4.50408e-06	3.16643e-06	ADORA1/ADM/ADRB2/ADCYAP1/ADCY6/AGT/ALOX12/AGTR1/AGTR2	9
GO:0008202	steroid metabolic process	21/341	273/16672	2.17466e-07	4.57971e-06	3.21961e-06	APP/APOF/ADM/APOA2/NR0B1/APOC1/APOE/APOA1/ABCA1/AGT/ACADVL/ACAA1/APOB/APOA4/ACADL/STS/AKR1B1/ATP1A1/AFP/ACLY/AGTR1	21
GO:0035588	G-protein coupled purinergic receptor signaling pathway	7/341	23/16672	2.60448e-07	5.42622e-06	3.81472e-06	ADORA1/ADCY5/ADORA2B/ACPP/ADORA3/ADA/ADORA2A	7
GO:0045940	positive regulation of steroid metabolic process	7/341	23/16672	2.60448e-07	5.42622e-06	3.81472e-06	APOA2/APOC1/APOE/APOA1/AGT/APOA4/AGTR1	7
GO:0007173	epidermal growth factor receptor signaling pathway	14/341	125/16672	2.71691e-07	5.63036e-06	3.95823e-06	APP/ADORA1/AP2A1/AKT1/AP2B1/FASLG/AP2A2/ADRA2A/ADRA2B/ABL1/ADRA2C/AGT/ARF4/AREG	14
GO:0009161	ribonucleoside monophosphate metabolic process	21/341	277/16672	2.77264e-07	5.71545e-06	4.01805e-06	ADSL/ADSS/ALDOA/ATP1B1/AK1/ACTN3/ATP1A2/AK4/ADCYAP1/ALDOC/ARNT/APRT/ADA/AMPD2/ADK/AMPD1/AK2/AMPD3/ALDOB/PARP1/ATIC	21
GO:0002576	platelet degranulation	13/341	107/16672	2.80435e-07	5.75039e-06	4.04261e-06	ACTN1/APP/ALDOA/APOH/ALB/ACTN4/SERPINA3/APOA1/ACTN2/APLP2/A2M/AHSG/A1BG	13
GO:0090130	tissue migration	19/341	231/16672	2.96956e-07	5.96633e-06	4.19442e-06	ANGPT1/ACTA1/ACTG2/AKT1/RHOA/APOH/ACTA2/APOE/ANXA3/ARSB/ANGPT2/APOA1/AGT/ACVRL1/RHOB/ALOX12/ACTC1/AAMP/AGTR2	19
GO:0032890	regulation of organic acid transport	6/341	15/16672	3.00154e-07	5.96633e-06	4.19442e-06	AKT1/ATP1A2/ARG1/AKT2/ABAT/AGT	6
GO:0034375	high-density lipoprotein particle remodeling	6/341	15/16672	3.00154e-07	5.96633e-06	4.19442e-06	APOA2/APOC3/APOC1/APOE/APOA1/APOA4	6
GO:0043101	purine-containing compound salvage	6/341	15/16672	3.00154e-07	5.96633e-06	4.19442e-06	APRT/ADA/AMPD2/ADK/AMPD1/AMPD3	6
GO:0051004	regulation of lipoprotein lipase activity	6/341	15/16672	3.00154e-07	5.96633e-06	4.19442e-06	APOH/APOC3/APOC1/APOC2/APOA1/APOA4	6
GO:0060192	negative regulation of lipase activity	6/341	15/16672	3.00154e-07	5.96633e-06	4.19442e-06	APOA2/APOC3/ANXA1/APOC1/ABL1/APOA1	6
GO:0003044	regulation of systemic arterial blood pressure mediated by a chemical signal	9/341	46/16672	3.18884e-07	6.30646e-06	4.43353e-06	ADRA1B/ADRB2/ADRB1/ADRA1D/ADRA1A/AGT/ADRB3/AGTR1/AGTR2	9
GO:1901653	cellular response to peptide	22/341	304/16672	3.20857e-07	6.30679e-06	4.43377e-06	ASS1/ADCY2/AKT1/ADCY5/ADCY3/ADCY7/ADCY8/ARG1/ADCY6/ADCY1/ACTN2/AKT2/APOBEC1/APRT/AGT/APEX1/ADCY9/AKR1B1/AHSG/PARP1/AGTR1/AGTR2	22
GO:0042304	regulation of fatty acid biosynthetic process	8/341	34/16672	3.22139e-07	6.30679e-06	4.43377e-06	APOC3/ANXA1/APOC1/APOC2/APOA1/ACADVL/APOA4/ACADL	8
GO:1901657	glycosyl compound metabolic process	26/341	408/16672	3.27357e-07	6.37692e-06	4.48307e-06	ADSL/ADSS/ALDOA/ATP1B1/ACPP/AK1/ACTN3/ATP1A2/AK4/ADCYAP1/ALDOC/ARNT/AMD1/APOBEC1/APRT/ADA/AMPD2/ADK/AK2/AKR1B1/AMPD3/ALDOB/ACAT1/PARP1/ATIC/AHCY	26
GO:0019218	regulation of steroid metabolic process	11/341	75/16672	3.39752e-07	6.58543e-06	4.62966e-06	APOA2/APOC1/APOE/APOA1/AGT/ACADVL/APOB/APOA4/ACADL/ATP1A1/AGTR1	11
GO:0032369	negative regulation of lipid transport	7/341	24/16672	3.61267e-07	6.96781e-06	4.89847e-06	AKT1/APOA2/APOC3/APOC1/APOC2/AKT2/AGTR2	7
GO:0006720	isoprenoid metabolic process	14/341	128/16672	3.64982e-07	7.00478e-06	4.92447e-06	ALDH3A2/APOA2/APOC3/ALDH1A3/APOE/APOC2/ABCA4/APOA1/ALDH1A1/ADH4/ADH7/APOB/APOA4/ADH5	14
GO:0046128	purine ribonucleoside metabolic process	23/341	332/16672	3.74226e-07	7.14698e-06	5.02444e-06	ADSL/ADSS/ALDOA/ATP1B1/ACPP/AK1/ACTN3/ATP1A2/AK4/ADCYAP1/ALDOC/ARNT/AMD1/APRT/ADA/AMPD2/ADK/AK2/AMPD3/ALDOB/ACAT1/PARP1/AHCY	23
GO:0051056	regulation of small GTPase mediated signal transduction	21/341	283/16672	3.95661e-07	7.51948e-06	5.28631e-06	RHOH/ABR/RHOA/ARHGDIB/APOC3/ARHGDIA/RHOC/APOE/ARHGAP5/ARHGAP6/ARHGDIG/APOA1/ABCA1/RHOG/ADRA1A/ARF6/A2M/ARHGAP1/ARHGAP4/RHOB/ARRB1	21
GO:0015914	phospholipid transport	10/341	61/16672	4.0133e-07	7.59021e-06	5.33603e-06	APOA2/ABCA2/APOC3/APOC1/APOE/APOC2/ABCA4/APOA1/ABCA1/APOA4	10
GO:0009116	nucleoside metabolic process	25/341	386/16672	4.1075e-07	7.73083e-06	5.43489e-06	ADSL/ADSS/ALDOA/ATP1B1/ACPP/AK1/ACTN3/ATP1A2/AK4/ADCYAP1/ALDOC/ARNT/AMD1/APOBEC1/APRT/ADA/AMPD2/ADK/AK2/AMPD3/ALDOB/ACAT1/PARP1/ATIC/AHCY	25
GO:0042278	purine nucleoside metabolic process	23/341	335/16672	4.38437e-07	8.2033e-06	5.76705e-06	ADSL/ADSS/ALDOA/ATP1B1/ACPP/AK1/ACTN3/ATP1A2/AK4/ADCYAP1/ALDOC/ARNT/AMD1/APRT/ADA/AMPD2/ADK/AK2/AMPD3/ALDOB/ACAT1/PARP1/AHCY	23
GO:0009119	ribonucleoside metabolic process	24/341	361/16672	4.40064e-07	8.2033e-06	5.76705e-06	ADSL/ADSS/ALDOA/ATP1B1/ACPP/AK1/ACTN3/ATP1A2/AK4/ADCYAP1/ALDOC/ARNT/AMD1/APOBEC1/APRT/ADA/AMPD2/ADK/AK2/AMPD3/ALDOB/ACAT1/PARP1/AHCY	24
GO:0071375	cellular response to peptide hormone stimulus	21/341	287/16672	4.9867e-07	9.25151e-06	6.50395e-06	ASS1/ADCY2/AKT1/ADCY5/ADCY3/ADCY7/ADCY8/ARG1/ADCY6/ADCY1/ACTN2/AKT2/APOBEC1/APRT/AGT/APEX1/ADCY9/AHSG/PARP1/AGTR1/AGTR2	21
GO:0090662	ATP hydrolysis coupled transmembrane transport	8/341	36/16672	5.18083e-07	9.56613e-06	6.72513e-06	ATP1B1/ATP12A/ATP1B3/ATP1A2/ATP1B2/ATP1A4/ATP1A3/ATP1A1	8
GO:0010594	regulation of endothelial cell migration	13/341	113/16672	5.32386e-07	9.78385e-06	6.87819e-06	ANGPT1/AKT1/RHOA/APOH/APOE/ANXA3/ANGPT2/AGT/ACVRL1/RHOB/ALOX12/AAMP/AGTR2	13
GO:0015837	amine transport	10/341	63/16672	5.48549e-07	1.00336e-05	7.05375e-06	AQP9/ADRA2A/ADRA2B/ATP1A2/ARG1/GRK2/ADRA2C/ABAT/AGT/AGTR2	10
GO:0010518	positive regulation of phospholipase activity	9/341	49/16672	5.63393e-07	1.02569e-05	7.21076e-06	ANG/ABL2/APOC2/ADRA1A/AGT/ADCYAP1R1/ARF4/ARL1/AGTR1	9
GO:0035725	sodium ion transmembrane transport	14/341	133/16672	5.85818e-07	1.06156e-05	7.4629e-06	SHROOM2/ATP1B1/ACTN4/ATP12A/ATP1B3/ATP1A2/ANK3/ARF1/ATP1B2/ATP1A4/ATP1A3/ASIC1/ATP1A1/ASIC2	14
GO:0009123	nucleoside monophosphate metabolic process	21/341	290/16672	5.91463e-07	1.06682e-05	7.49994e-06	ADSL/ADSS/ALDOA/ATP1B1/AK1/ACTN3/ATP1A2/AK4/ADCYAP1/ALDOC/ARNT/APRT/ADA/AMPD2/ADK/AMPD1/AK2/AMPD3/ALDOB/PARP1/ATIC	21
GO:0015748	organophosphate ester transport	11/341	81/16672	7.53884e-07	1.34776e-05	9.47498e-06	APOA2/ABCA2/APOC3/APOC1/APOE/APOC2/SLC25A6/ABCA4/APOA1/ABCA1/APOA4	11
GO:0008016	regulation of heart contraction	18/341	222/16672	7.54139e-07	1.34776e-05	9.47498e-06	ADORA1/ADM/ASPH/ATP1B1/ANK2/ADRA1B/ATP1B3/ATP1A2/ADRB1/GRK2/ATP1B2/ADRA1A/ADA/ATP1A4/ATP1A3/AGT/ATP1A1/AGTR2	18
GO:0006188	IMP biosynthetic process	5/341	10/16672	8.05276e-07	1.42607e-05	1.00255e-05	ADSL/AMPD2/AMPD1/AMPD3/ATIC	5
GO:0034380	high-density lipoprotein particle assembly	5/341	10/16672	8.05276e-07	1.42607e-05	1.00255e-05	APOA2/APOE/APOA1/ABCA1/APOA4	5
GO:0042058	regulation of epidermal growth factor receptor signaling pathway	11/341	82/16672	8.54971e-07	1.50722e-05	1.0596e-05	APP/ADORA1/AP2A1/AKT1/AP2B1/FASLG/AP2A2/ADRA2A/ADRA2B/ADRA2C/AGT	11
GO:0042157	lipoprotein metabolic process	14/341	138/16672	9.19875e-07	1.61434e-05	1.1349e-05	APOA2/ATM/APOC3/ALB/APOD/APOC1/APOE/ALOX12B/APOC2/APOA1/ABCA1/APOBEC1/APOB/APOA4	14
GO:0051271	negative regulation of cellular component movement	19/341	249/16672	9.36407e-07	1.62868e-05	1.14499e-05	ACTN1/ABR/ADORA1/RHOA/ARHGDIB/APOH/ACTN4/AIF1/APOD/APOE/ANGPT2/ALOX15B/ADA/APEX1/ARHGAP4/ACVRL1/RHOB/AGTR2/ADARB1	19
GO:0060047	heart contraction	19/341	249/16672	9.36407e-07	1.62868e-05	1.14499e-05	ADORA1/ADM/ASPH/ATP1B1/ANK2/ADRA1B/ATP1B3/ATP1A2/ADRB1/GRK2/ATP1B2/ADRA1A/ADA/ATP1A4/ATP1A3/AGT/ATP1A1/ACTC1/AGTR2	19
GO:0009306	protein secretion	27/341	460/16672	9.69098e-07	1.67805e-05	1.17969e-05	ANGPT1/ACVR2B/ADAM8/ANG/ACHE/APOA2/ADCY5/ARNTL/ADRA2A/ANXA1/ARF1/ABL1/SLC25A6/APBB1/ARL2/APOA1/ABCA1/ALOX15B/SLC25A4/ARL4D/ADRA2C/ABAT/AGT/ANXA4/ARRB1/AGTR2/SLC25A5	27
GO:1903779	regulation of cardiac conduction	10/341	67/16672	9.90014e-07	1.70619e-05	1.19947e-05	ASPH/ATP1B1/ANK2/ATP1B3/ATP1A2/ATP1B2/ATP1A4/ATP1A3/AGT/ATP1A1	10
GO:0046461	neutral lipid catabolic process	8/341	39/16672	9.98487e-07	1.70619e-05	1.19947e-05	APOA2/APOC3/APOE/APOC2/APOA1/AADAC/APOB/APOA4	8
GO:0046464	acylglycerol catabolic process	8/341	39/16672	9.98487e-07	1.70619e-05	1.19947e-05	APOA2/APOC3/APOE/APOC2/APOA1/AADAC/APOB/APOA4	8
GO:1902307	positive regulation of sodium ion transmembrane transport	6/341	18/16672	1.05692e-06	1.79814e-05	1.26412e-05	ATP1B1/ACTN4/ATP1B3/ANK3/ARF1/ATP1B2	6
GO:0003015	heart process	19/341	252/16672	1.1217e-06	1.90006e-05	1.33577e-05	ADORA1/ADM/ASPH/ATP1B1/ANK2/ADRA1B/ATP1B3/ATP1A2/ADRB1/GRK2/ATP1B2/ADRA1A/ADA/ATP1A4/ATP1A3/AGT/ATP1A1/ACTC1/AGTR2	19
GO:1901184	regulation of ERBB signaling pathway	11/341	85/16672	1.23344e-06	2.0803e-05	1.46248e-05	APP/ADORA1/AP2A1/AKT1/AP2B1/FASLG/AP2A2/ADRA2A/ADRA2B/ADRA2C/AGT	11
GO:0042632	cholesterol homeostasis	10/341	69/16672	1.30916e-06	2.18905e-05	1.53893e-05	APOA2/ABCA2/APOC3/APOE/APOC2/APOA1/ABCA1/AMPD2/APOB/APOA4	10
GO:0055092	sterol homeostasis	10/341	69/16672	1.30916e-06	2.18905e-05	1.53893e-05	APOA2/ABCA2/APOC3/APOE/APOC2/APOA1/ABCA1/AMPD2/APOB/APOA4	10
GO:0030336	negative regulation of cell migration	17/341	208/16672	1.37374e-06	2.28721e-05	1.60795e-05	ABR/ADORA1/RHOA/ARHGDIB/APOH/AIF1/APOD/APOE/ANGPT2/ALOX15B/ADA/APEX1/ARHGAP4/ACVRL1/RHOB/AGTR2/ADARB1	17
GO:0034374	low-density lipoprotein particle remodeling	5/341	11/16672	1.45159e-06	2.40655e-05	1.69184e-05	APOA2/APOE/AGT/APOB/AGTR1	5
GO:0007265	Ras protein signal transduction	21/341	307/16672	1.4885e-06	2.45729e-05	1.72751e-05	ABR/RHOA/ARHGDIB/APOC3/ARHGDIA/ADRA2A/AIF1/APOE/ARHGAP5/ARHGAP6/ARHGDIG/APOA1/ABCA1/RHOG/ADRA1A/ARF6/ARHGAP1/ARHGAP4/RHOB/ARRB1/AGTR1	21
GO:0033539	fatty acid beta-oxidation using acyl-CoA dehydrogenase	6/341	19/16672	1.51821e-06	2.49576e-05	1.75456e-05	ACADM/ACADVL/ACADSB/ACADS/ACADL/ACOX1	6
GO:0008361	regulation of cell size	15/341	165/16672	1.53264e-06	2.50889e-05	1.76379e-05	AQP8/AQP9/AKT1/AQP2/AQP6/ANXA7/APOE/AQP5/AQP3/ABL1/ARHGAP4/ADD1/AQP4/AQP7/AQP1	15
GO:0051952	regulation of amine transport	9/341	55/16672	1.56531e-06	2.55164e-05	1.79384e-05	ADRA2A/ADRA2B/ATP1A2/ARG1/GRK2/ADRA2C/ABAT/AGT/AGTR2	9
GO:0007584	response to nutrient	15/341	166/16672	1.65411e-06	2.68518e-05	1.88772e-05	ADSL/ASS1/ALDH3A1/APAF1/ARG1/AQP3/ARSB/ALPL/APOA1/ABCA1/ADA/ASCL1/SERPINC1/ALAD/AHCY	15
GO:0038127	ERBB signaling pathway	14/341	146/16672	1.81642e-06	2.93643e-05	2.06435e-05	APP/ADORA1/AP2A1/AKT1/AP2B1/FASLG/AP2A2/ADRA2A/ADRA2B/ABL1/ADRA2C/AGT/ARF4/AREG	14
GO:0015909	long-chain fatty acid transport	9/341	56/16672	1.83182e-06	2.94908e-05	2.07325e-05	AKT1/PLIN2/ANXA1/APOE/ACACB/ABCD1/AKT2/ACACA/ABCD2	9
GO:0030100	regulation of endocytosis	16/341	190/16672	1.90097e-06	3.04781e-05	2.14266e-05	ANGPT1/ABR/ALOX15/APOC3/ACTN4/APOC1/ARF1/ABL2/APOC2/ABL1/ANXA2/ARF6/AHSG/ARRB2/ARRB1/BIN1	16
GO:0045932	negative regulation of muscle contraction	6/341	20/16672	2.13166e-06	3.40367e-05	2.39283e-05	ADORA1/ADORA2B/ADRB2/ATP1A2/GRK2/ADRA2C	6
GO:0042451	purine nucleoside biosynthetic process	11/341	90/16672	2.19607e-06	3.478e-05	2.44508e-05	ADSL/ADSS/ALDOA/AK1/AK4/AMD1/APRT/ADA/ADK/AK2/ACAT1	11
GO:0046129	purine ribonucleoside biosynthetic process	11/341	90/16672	2.19607e-06	3.478e-05	2.44508e-05	ADSL/ADSS/ALDOA/AK1/AK4/AMD1/APRT/ADA/ADK/AK2/ACAT1	11
GO:0030301	cholesterol transport	10/341	73/16672	2.22509e-06	3.49554e-05	2.45742e-05	APOA2/ABCA2/APOC3/APOC1/APOE/APOC2/APOA1/ABCA1/APOB/APOA4	10
GO:0043266	regulation of potassium ion transport	10/341	73/16672	2.22509e-06	3.49554e-05	2.45742e-05	ADORA1/ATF4/ATP1B1/ANK2/ADRA2A/ATP1B3/ANK3/ADCYAP1/ATP1B2/ACTN2	10
GO:0035587	purinergic receptor signaling pathway	7/341	31/16672	2.42651e-06	3.78275e-05	2.65933e-05	ADORA1/ADCY5/ADORA2B/ACPP/ADORA3/ADA/ADORA2A	7
GO:0010896	regulation of triglyceride catabolic process	5/341	12/16672	2.44675e-06	3.78275e-05	2.65933e-05	APOC3/APOC2/APOA1/AADAC/APOA4	5
GO:0019755	one-carbon compound transport	5/341	12/16672	2.44675e-06	3.78275e-05	2.65933e-05	AQP9/AQP5/AQP3/AQP7/AQP1	5
GO:0033604	negative regulation of catecholamine secretion	5/341	12/16672	2.44675e-06	3.78275e-05	2.65933e-05	ADRA2A/ADRA2B/ADRA2C/ABAT/AGTR2	5
GO:0015918	sterol transport	10/341	74/16672	2.52663e-06	3.8908e-05	2.73529e-05	APOA2/ABCA2/APOC3/APOC1/APOE/APOC2/APOA1/ABCA1/APOB/APOA4	10
GO:0007568	aging	19/341	268/16672	2.80253e-06	4.29868e-05	3.02204e-05	ASS1/ALDH3A1/AKT1/ADM/AMH/ATM/ARNTL/APOD/AMFR/APAF1/ARG1/ABL1/ADRA1A/ADA/ABAT/AGT/APEX1/ADRB3/ALOX12	19
GO:0045860	positive regulation of protein kinase activity	26/341	458/16672	2.86141e-06	4.37179e-05	3.07343e-05	ANGPT1/ADORA1/ACVR2B/ADCY2/AKT1/RHOA/ADAM8/ANG/ADCY5/ADORA2B/ADCY3/AGER/ADRA2A/ADRA2B/ADRB2/ADCY7/ADCYAP1/ADCY8/ABL1/ALK/ADCY6/ADCY1/ADRA2C/AGT/ADCY9/ARRB1	26
GO:0045822	negative regulation of heart contraction	6/341	21/16672	2.93314e-06	4.44876e-05	3.12755e-05	ADORA1/ATP1A2/GRK2/ADRA1A/ATP1A1/AGTR2	6
GO:0043542	endothelial cell migration	14/341	152/16672	2.93463e-06	4.44876e-05	3.12755e-05	ANGPT1/AKT1/RHOA/APOH/APOE/ANXA3/ANGPT2/APOA1/AGT/ACVRL1/RHOB/ALOX12/AAMP/AGTR2	14
GO:2000146	negative regulation of cell motility	17/341	220/16672	2.96473e-06	4.47697e-05	3.14738e-05	ABR/ADORA1/RHOA/ARHGDIB/APOH/AIF1/APOD/APOE/ANGPT2/ALOX15B/ADA/APEX1/ARHGAP4/ACVRL1/RHOB/AGTR2/ADARB1	17
GO:0050727	regulation of inflammatory response	20/341	295/16672	3.03872e-06	4.57098e-05	3.21347e-05	ABR/ADORA1/ADAM8/BIRC2/ADORA2B/BIRC3/AGER/ANXA1/APOD/APOE/ADCYAP1/ACP5/APOA1/ADA/AGT/APCS/A2M/AHSG/XIAP/AGTR1	20
GO:0034381	plasma lipoprotein particle clearance	7/341	32/16672	3.05177e-06	4.57297e-05	3.21487e-05	APOA2/APOC3/APOC1/APOE/APOC2/APOA1/APOB	7
GO:0006979	response to oxidative stress	23/341	376/16672	3.17692e-06	4.74226e-05	3.33388e-05	ATOX1/APP/AKT1/ATF4/NUDT2/ARNTL/AIF1/ANXA1/APOD/APOE/ARG1/ABL1/ARNT/ADA/APEX1/ALDH3B1/AREG/ALAD/APOA4/RHOB/AKR1B1/AQP1/PARP1	23
GO:0050708	regulation of protein secretion	23/341	377/16672	3.32111e-06	4.93856e-05	3.47188e-05	ANGPT1/ADAM8/ANG/ACHE/APOA2/ADCY5/ARNTL/ADRA2A/ANXA1/ARF1/ABL1/SLC25A6/APBB1/ARL2/APOA1/ALOX15B/SLC25A4/ADRA2C/ABAT/ANXA4/ARRB1/AGTR2/SLC25A5	23
GO:0051591	response to cAMP	11/341	94/16672	3.38858e-06	5.01974e-05	3.52895e-05	ASS1/AQP8/APP/ALDH3A1/AQP9/AANAT/BIRC2/AGXT/APEX1/AREG/AQP1	11
GO:0019433	triglyceride catabolic process	7/341	33/16672	3.80589e-06	5.57434e-05	3.91885e-05	APOC3/APOE/APOC2/APOA1/AADAC/APOB/APOA4	7
GO:0043268	positive regulation of potassium ion transport	7/341	33/16672	3.80589e-06	5.57434e-05	3.91885e-05	ADORA1/ATP1B1/ANK2/ADRA2A/ATP1B3/ATP1B2/ACTN2	7
GO:0045742	positive regulation of epidermal growth factor receptor signaling pathway	7/341	33/16672	3.80589e-06	5.57434e-05	3.91885e-05	ADORA1/AKT1/FASLG/ADRA2A/ADRA2B/ADRA2C/AGT	7
GO:0045055	regulated exocytosis	19/341	274/16672	3.87557e-06	5.65513e-05	3.97565e-05	ACTN1/ABR/APP/ALDOA/APOH/ADORA2B/ALB/ACTN4/SERPINA3/ADRA2A/ANXA3/ARF1/APOA1/ACTN2/APLP2/A2M/AP1G1/AHSG/A1BG	19
GO:1901018	positive regulation of potassium ion transmembrane transporter activity	5/341	13/16672	3.90938e-06	5.68319e-05	3.99537e-05	ATP1B1/ANK2/ATP1B3/ATP1B2/ACTN2	5
GO:0007565	female pregnancy	15/341	178/16672	3.95224e-06	5.69868e-05	4.00626e-05	AKT1/ARHGDIB/ADM/AR/ADCY7/ADCYAP1/ARG1/AGRP/ACVR1B/ANGPT2/ADRA2C/AGT/AMBP/STS/AKR1B1	15
GO:0044706	multi-multicellular organism process	16/341	201/16672	3.96025e-06	5.69868e-05	4.00626e-05	AKT1/ARHGDIB/ADM/AR/ADCY7/ADCYAP1/ARG1/AGRP/ACVR1B/ANGPT2/ADRA2C/AGT/ACVR2A/AMBP/STS/AKR1B1	16
GO:0006471	protein ADP-ribosylation	6/341	22/16672	3.96392e-06	5.69868e-05	4.00626e-05	ART3/ART1/PARP4/ART4/ARF4/PARP1	6
GO:0007599	hemostasis	22/341	355/16672	4.23288e-06	6.06298e-05	4.26236e-05	ACTG1/AKT1/RHOA/APOH/ANXA5/ADRA2A/ADRA2B/ANXA7/APOE/ANXA2/RHOG/ADRA2C/ABAT/A2M/ACTB/SERPINC1/RHOB/ADORA2A/ARRB2/ASIC2/ALOX12/ARRB1	22
GO:1901186	positive regulation of ERBB signaling pathway	7/341	34/16672	4.70908e-06	6.69584e-05	4.70728e-05	ADORA1/AKT1/FASLG/ADRA2A/ADRA2B/ADRA2C/AGT	7
GO:1903523	negative regulation of blood circulation	7/341	34/16672	4.70908e-06	6.69584e-05	4.70728e-05	ADORA1/ADM/ATP1A2/GRK2/ADRA1A/ATP1A1/AGTR2	7
GO:0002028	regulation of sodium ion transport	10/341	80/16672	5.1952e-06	7.36019e-05	5.17432e-05	AKT1/ATP1B1/ACTN4/ATP1B3/ADRB2/ATP1A2/ANK3/ARF1/ATP1B2/ATP1A1	10
GO:0045922	negative regulation of fatty acid metabolic process	6/341	23/16672	5.27103e-06	7.44055e-05	5.23082e-05	AKT1/APOC3/APOC1/ACACB/ACADVL/ACADL	6
GO:0010959	regulation of metal ion transport	20/341	307/16672	5.54415e-06	7.79784e-05	5.482e-05	ADORA1/AKT1/ATF4/ATP1B1/ANK2/ACTN4/ADRA2A/ATP1B3/ADRB2/ATP1A2/ANK3/ARF1/ADCYAP1/ABL1/ATP1B2/ACTN2/AGT/ADCYAP1R1/ATP1A1/ARRB2	20
GO:0030168	platelet activation	14/341	161/16672	5.76632e-06	7.99068e-05	5.61757e-05	ACTG1/AKT1/RHOA/ADRA2A/ADRA2B/APOE/RHOG/ADRA2C/ABAT/ACTB/RHOB/ARRB2/ALOX12/ARRB1	14
GO:1901654	response to ketone	14/341	161/16672	5.76632e-06	7.99068e-05	5.61757e-05	ASS1/ADCY2/AKT1/AANAT/ADCY5/ADCY3/ARG1/ADCY6/ADCY1/ACACA/AKR1B1/AQP1/PARP1/AGTR2	14
GO:0006081	cellular aldehyde metabolic process	9/341	64/16672	5.76784e-06	7.99068e-05	5.61757e-05	ALDH3A1/ALDH3A2/ALDH1A3/ALDH9A1/ALDH1A1/ALDH3B1/ADH4/ALDOB/ADH5	9
GO:0001659	temperature homeostasis	7/341	35/16672	5.7838e-06	7.99068e-05	5.61757e-05	ADORA1/ADRB2/ADRB1/ABAT/ACADVL/ADRB3/ACADL	7
GO:0010765	positive regulation of sodium ion transport	7/341	35/16672	5.7838e-06	7.99068e-05	5.61757e-05	AKT1/ATP1B1/ACTN4/ATP1B3/ANK3/ARF1/ATP1B2	7
GO:0003085	negative regulation of systemic arterial blood pressure	5/341	14/16672	5.97946e-06	8.23179e-05	5.78707e-05	ADRB2/ADRB1/ADRA1A/ADRB3/AGTR2	5
GO:0046503	glycerolipid catabolic process	8/341	49/16672	6.1254e-06	8.40301e-05	5.90744e-05	APOA2/APOC3/APOE/APOC2/APOA1/AADAC/APOB/APOA4	8
GO:0006814	sodium ion transport	16/341	208/16672	6.14743e-06	8.40364e-05	5.90789e-05	SHROOM2/AKT1/ATP1B1/ACTN4/ATP12A/ATP1B3/ADRB2/ATP1A2/ANK3/ARF1/ATP1B2/ATP1A4/ATP1A3/ASIC1/ATP1A1/ASIC2	16
GO:0055067	monovalent inorganic cation homeostasis	13/341	141/16672	6.55954e-06	8.93566e-05	6.2819e-05	ADORA1/FASLG/ATP1B1/ATP12A/ATP1B3/ATP1A2/ATP1B2/ATP1A4/ATP1A3/AGT/ATP1A1/AGTR1/AGTR2	13
GO:0008203	cholesterol metabolic process	12/341	121/16672	7.02194e-06	9.51061e-05	6.6861e-05	APP/APOF/APOA2/APOC1/APOE/APOA1/ABCA1/ACADVL/APOB/APOA4/ACADL/ACLY	12
GO:0045744	negative regulation of G-protein coupled receptor protein signaling pathway	7/341	36/16672	7.05484e-06	9.51061e-05	6.6861e-05	ADM/ADRA2A/ADRB2/GRK2/ADA/ARRB2/ARRB1	7
GO:0045777	positive regulation of blood pressure	7/341	36/16672	7.05484e-06	9.51061e-05	6.6861e-05	ADORA1/ADRA1B/ADRB1/ADRA1D/ADRA1A/AGT/ADH5	7
GO:0006813	potassium ion transport	16/341	211/16672	7.37752e-06	9.87726e-05	6.94386e-05	ADORA1/ATF4/ATP1B1/ANK2/ADRA2A/ATP12A/ATP1B3/ATP1A2/ANK3/ADCYAP1/ATP1B2/ACTN2/ATP1A4/ATP1A3/ATP1A1/AQP1	16
GO:0007162	negative regulation of cell adhesion	16/341	211/16672	7.37752e-06	9.87726e-05	6.94386e-05	ANGPT1/ASS1/ARHGDIB/ARHGDIA/ACTN4/ANXA1/APOD/ABL1/ARHGAP6/ARHGDIG/ANGPT2/APOA1/ABAT/ACVRL1/ADAM10/ALOX12	16
GO:0031348	negative regulation of defense response	13/341	143/16672	7.65693e-06	0.000102162	7.18216e-05	ADAR/ABR/ADORA1/AGER/APOD/APOE/ADCYAP1/ACP5/APOA1/ADA/APCS/A2M/ARRB2	13
GO:0046879	hormone secretion	19/341	288/16672	7.95613e-06	0.000105792	7.43735e-05	ADORA1/ACVR2B/ADM/ADCY5/ARNTL/ADRA2A/ANXA1/ADRA2B/ADCYAP1/SLC25A6/ARL2/SLC25A4/ADRA2C/ABAT/AGT/ARRB1/AGTR1/AGTR2/SLC25A5	19
GO:0010632	regulation of epithelial cell migration	14/341	166/16672	8.21838e-06	0.000108907	7.65636e-05	ANGPT1/AKT1/RHOA/APOH/APOE/ANXA3/ARSB/ANGPT2/AGT/ACVRL1/RHOB/ALOX12/AAMP/AGTR2	14
GO:0002029	desensitization of G-protein coupled receptor protein signaling pathway	5/341	15/16672	8.81911e-06	0.000114914	8.07862e-05	ADM/ADRB2/GRK2/ARRB2/ARRB1	5
GO:0006000	fructose metabolic process	5/341	15/16672	8.81911e-06	0.000114914	8.07862e-05	ALDOA/ALDOC/ALDH1A1/AKR1B1/ALDOB	5
GO:0014061	regulation of norepinephrine secretion	5/341	15/16672	8.81911e-06	0.000114914	8.07862e-05	ADRA2A/ADRA2B/ADRA2C/AGT/AGTR2	5
GO:0022401	negative adaptation of signaling pathway	5/341	15/16672	8.81911e-06	0.000114914	8.07862e-05	ADM/ADRB2/GRK2/ARRB2/ARRB1	5
GO:0051953	negative regulation of amine transport	5/341	15/16672	8.81911e-06	0.000114914	8.07862e-05	ADRA2A/ADRA2B/ADRA2C/ABAT/AGTR2	5
GO:0015908	fatty acid transport	10/341	85/16672	9.02043e-06	0.000117145	8.23549e-05	AKT1/PLIN2/ANXA1/APOE/ACACB/ABCD1/AKT2/ACACA/ABCD2/AGTR2	10
GO:0033674	positive regulation of kinase activity	26/341	489/16672	9.25483e-06	0.00011979	8.42142e-05	ANGPT1/ADORA1/ACVR2B/ADCY2/AKT1/RHOA/ADAM8/ANG/ADCY5/ADORA2B/ADCY3/AGER/ADRA2A/ADRA2B/ADRB2/ADCY7/ADCYAP1/ADCY8/ABL1/ALK/ADCY6/ADCY1/ADRA2C/AGT/ADCY9/ARRB1	26
GO:0042180	cellular ketone metabolic process	16/341	215/16672	9.35821e-06	0.000120727	8.4873e-05	AKT1/ADM/APOC3/ANXA1/APOC1/APOC2/ACACB/APOA1/AKT2/ACADVL/ADH4/APOA4/ACADL/AKR1B1/AFP/ABCD2	16
GO:0006941	striated muscle contraction	13/341	146/16672	9.60683e-06	0.000123525	8.68403e-05	ADORA1/ALDOA/ATP1B1/ANK2/ADRA1B/ARG2/ACTN3/ATP1A2/GRK2/ADRA1A/ATP1A3/ATP1A1/ACTC1	13
GO:0034329	cell junction assembly	15/341	192/16672	9.94983e-06	0.000127515	8.96449e-05	ACTN1/ACTG1/RHOA/ANK2/ACTN4/RHOC/APOD/ACTN3/ARHGAP6/ARL2/ACTN2/AGT/ACTB/ACVRL1/APC	15
GO:0046890	regulation of lipid biosynthetic process	12/341	126/16672	1.0663e-05	0.000135762	9.54429e-05	AKT1/APOC3/ANXA1/APOC1/APOE/APOC2/APOA1/ACADVL/APOB/APOA4/ACADL/ATP1A1	12
GO:1902652	secondary alcohol metabolic process	12/341	126/16672	1.0663e-05	0.000135762	9.54429e-05	APP/APOF/APOA2/APOC1/APOE/APOA1/ABCA1/ACADVL/APOB/APOA4/ACADL/ACLY	12
GO:0010644	cell communication by electrical coupling	6/341	26/16672	1.14144e-05	0.000144855	0.000101835	ATP1B1/ATP1A2/ANK3/ATP1B2/ATP1A3/ATP1A1	6
GO:0007596	blood coagulation	21/341	350/16672	1.14809e-05	0.000145226	0.000102096	ACTG1/AKT1/RHOA/APOH/ANXA5/ADRA2A/ADRA2B/APOE/ANXA2/RHOG/ADRA2C/ABAT/A2M/ACTB/SERPINC1/RHOB/ADORA2A/ARRB2/ASIC2/ALOX12/ARRB1	21
GO:0030004	cellular monovalent inorganic cation homeostasis	11/341	107/16672	1.20073e-05	0.000151393	0.000106431	FASLG/ATP1B1/ATP12A/ATP1B3/ATP1A2/ATP1B2/ATP1A4/ATP1A3/AGT/ATP1A1/AGTR2	11
GO:0046164	alcohol catabolic process	7/341	39/16672	1.23317e-05	0.000154484	0.000108604	ALDH1B1/ALDH2/APOE/ALDH3B2/ALDH3B1/ADH4/ADH7	7
GO:0050433	regulation of catecholamine secretion	7/341	39/16672	1.23317e-05	0.000154484	0.000108604	ADRA2A/ADRA2B/GRK2/ADRA2C/ABAT/AGT/AGTR2	7
GO:0048243	norepinephrine secretion	5/341	16/16672	1.26132e-05	0.000157504	0.000110728	ADRA2A/ADRA2B/ADRA2C/AGT/AGTR2	5
GO:0009914	hormone transport	19/341	298/16672	1.29114e-05	0.000160712	0.000112983	ADORA1/ACVR2B/ADM/ADCY5/ARNTL/ADRA2A/ANXA1/ADRA2B/ADCYAP1/SLC25A6/ARL2/SLC25A4/ADRA2C/ABAT/AGT/ARRB1/AGTR1/AGTR2/SLC25A5	19
GO:0046883	regulation of hormone secretion	17/341	246/16672	1.31171e-05	0.000162375	0.000114152	ADORA1/ADCY5/ARNTL/ADRA2A/ANXA1/ADRA2B/ADCYAP1/SLC25A6/ARL2/SLC25A4/ADRA2C/ABAT/AGT/ARRB1/AGTR1/AGTR2/SLC25A5	17
GO:0043271	negative regulation of ion transport	11/341	108/16672	1.31284e-05	0.000162375	0.000114152	ADORA1/AKT1/ATF4/ADRA2A/ATP1A2/ANK3/ADCYAP1/ACTN2/AKT2/ABAT/AGTR2	11
GO:0050817	coagulation	21/341	354/16672	1.36291e-05	0.000168035	0.000118131	ACTG1/AKT1/RHOA/APOH/ANXA5/ADRA2A/ADRA2B/APOE/ANXA2/RHOG/ADRA2C/ABAT/A2M/ACTB/SERPINC1/RHOB/ADORA2A/ARRB2/ASIC2/ALOX12/ARRB1	21
GO:0042455	ribonucleoside biosynthetic process	11/341	109/16672	1.43392e-05	0.000176232	0.000123894	ADSL/ADSS/ALDOA/AK1/AK4/AMD1/APRT/ADA/ADK/AK2/ACAT1	11
GO:0040013	negative regulation of locomotion	17/341	248/16672	1.45749e-05	0.000178566	0.000125534	ABR/ADORA1/RHOA/ARHGDIB/APOH/AIF1/APOD/APOE/ANGPT2/ALOX15B/ADA/APEX1/ARHGAP4/ACVRL1/RHOB/AGTR2/ADARB1	17
GO:0048259	regulation of receptor-mediated endocytosis	9/341	72/16672	1.54423e-05	0.0001886	0.000132589	ANGPT1/APOC3/APOC1/ARF1/APOC2/ANXA2/ARF6/ARRB2/ARRB1	9
GO:0042886	amide transport	18/341	276/16672	1.61048e-05	0.000196076	0.000137845	ADORA1/AQP9/ACVR2B/ADCY5/ARNTL/ADRA2A/ANXA1/ADCYAP1/AQP3/SLC25A6/ARL2/ABCA1/SLC25A4/ADRA2C/ABAT/AQP7/ARRB1/SLC25A5	18
GO:0023058	adaptation of signaling pathway	5/341	17/16672	1.75701e-05	0.000212587	0.000149452	ADM/ADRB2/GRK2/ARRB2/ARRB1	5
GO:0048261	negative regulation of receptor-mediated endocytosis	5/341	17/16672	1.75701e-05	0.000212587	0.000149452	APOC3/APOC1/APOC2/ANXA2/ARF6	5
GO:0002026	regulation of the force of heart contraction	6/341	28/16672	1.80443e-05	0.000216309	0.000152069	ADM/ATP1A2/ADRB1/GRK2/ADRA1A/ATP1A1	6
GO:0046320	regulation of fatty acid oxidation	6/341	28/16672	1.80443e-05	0.000216309	0.000152069	AKT1/ACACB/AKT2/ACADVL/ACADL/ABCD2	6
GO:0050690	regulation of defense response to virus by virus	6/341	28/16672	1.80443e-05	0.000216309	0.000152069	AP1B1/AP2A1/AP2B1/AP2A2/ARF1/AP1G1	6
GO:0052548	regulation of endopeptidase activity	21/341	363/16672	1.98429e-05	0.000237141	0.000166714	APP/AKT1/BIRC2/ASPH/FASLG/BIRC3/SERPINA3/APAF1/FAS/BIRC5/AGT/APLP2/A2M/AMBP/SERPINC1/AHSG/ARRB2/AQP1/ALOX12/XIAP/ARRB1	21
GO:0043270	positive regulation of ion transport	15/341	204/16672	2.04899e-05	0.000243747	0.000171358	ADORA1/AKT1/ATP1B1/ANK2/ACTN4/ADRA2A/ATP1B3/ANK3/ARF1/ABL1/ATP1B2/ACTN2/ABAT/ADCYAP1R1/ARRB2	15
GO:0050432	catecholamine secretion	7/341	42/16672	2.05208e-05	0.000243747	0.000171358	ADRA2A/ADRA2B/GRK2/ADRA2C/ABAT/AGT/AGTR2	7
GO:0016125	sterol metabolic process	12/341	135/16672	2.14922e-05	0.00025451	0.000178924	APP/APOF/APOA2/APOC1/APOE/APOA1/ABCA1/ACADVL/APOB/APOA4/ACADL/ACLY	12
GO:0010951	negative regulation of endopeptidase activity	16/341	231/16672	2.28802e-05	0.000270125	0.000189902	APP/AKT1/BIRC2/BIRC3/SERPINA3/BIRC5/AGT/APLP2/A2M/AMBP/SERPINC1/AHSG/ARRB2/AQP1/XIAP/ARRB1	16
GO:0050777	negative regulation of immune response	11/341	115/16672	2.38461e-05	0.000280678	0.000197321	ANGPT1/ADAR/ABR/ALOX15/APOA2/ANXA1/ADCYAP1/APOA1/A2M/AMBP/ARRB2	11
GO:0046031	ADP metabolic process	9/341	76/16672	2.40603e-05	0.000281785	0.000198099	ALDOA/AK1/ACTN3/AK4/ALDOC/ARNT/AK2/AMPD3/ALDOB	9
GO:0045776	negative regulation of blood pressure	7/341	43/16672	2.40848e-05	0.000281785	0.000198099	ADORA1/ADRB2/ADRB1/ADRA1A/ABAT/ADRB3/AGTR2	7
GO:0001655	urogenital system development	19/341	312/16672	2.44854e-05	0.000285614	0.000200791	ANGPT1/ASS1/ACVR2B/AQP2/AMH/AR/ARL3/JAG1/ANXA1/ARG2/ACTA2/ANGPT2/ALOX15B/AGT/AMPD2/AKR1B1/ACAT1/AGTR1/AGTR2	19
GO:0032535	regulation of cellular component size	20/341	340/16672	2.46748e-05	0.000286964	0.00020174	AQP8/AQP9/ALOX15/AKT1/AQP2/AQP6/ADD2/ANXA7/APOE/AQP5/ARF1/AQP3/ABL1/ACTN2/ARF6/ARHGAP4/ADD1/AQP4/AQP7/AQP1	20
GO:0015718	monocarboxylic acid transport	12/341	137/16672	2.49103e-05	0.00028884	0.000203059	AQP9/AKT1/PLIN2/ALB/ANXA1/APOE/ACACB/ABCD1/AKT2/ACACA/ABCD2/AGTR2	12
GO:0007586	digestion	13/341	160/16672	2.56898e-05	0.000296995	0.000208792	ACO1/AMY2A/APOA2/AMY1B/SERPINA3/ADRA2A/AMY2B/AMY1A/AQP5/APOA1/AMY1C/APOA4/AQP1	13
GO:0045923	positive regulation of fatty acid metabolic process	6/341	30/16672	2.74749e-05	0.000316693	0.00022264	ANXA1/APOC2/APOA1/AKT2/APOA4/ABCD2	6
GO:0046942	carboxylic acid transport	17/341	261/16672	2.81174e-05	0.000323142	0.000227174	ADORA1/AQP9/AKT1/APBA1/PLIN2/AGXT/ALB/ANXA1/APOE/ATP1A2/ACACB/ABCD1/AKT2/ABAT/ACACA/ABCD2/AGTR2	17
GO:0051048	negative regulation of secretion	14/341	186/16672	2.97861e-05	0.000341314	0.000239949	ANGPT1/ABR/ADORA1/APOA2/ADRA2A/ANXA1/ADRA2B/APOA1/ADRA2C/ADA/ABAT/ANXA4/ASIC1/AGTR2	14
GO:0006639	acylglycerol metabolic process	11/341	118/16672	3.0369e-05	0.000346972	0.000243927	ANG/APOA2/APOH/APOC3/APOC1/APOE/APOC2/APOA1/AADAC/APOB/APOA4	11
GO:0006525	arginine metabolic process	5/341	19/16672	3.19223e-05	0.000362593	0.000254909	ASS1/ASL/ARG2/ARG1/ART4	5
GO:0015874	norepinephrine transport	5/341	19/16672	3.19223e-05	0.000362593	0.000254909	ADRA2A/ADRA2B/ADRA2C/AGT/AGTR2	5
GO:0046689	response to mercury ion	4/341	10/16672	3.27605e-05	0.000368777	0.000259256	AQP9/AQP2/ALAD/AQP1	4
GO:0051006	positive regulation of lipoprotein lipase activity	4/341	10/16672	3.27605e-05	0.000368777	0.000259256	APOH/APOC2/APOA1/APOA4	4
GO:0006638	neutral lipid metabolic process	11/341	119/16672	3.28607e-05	0.000368777	0.000259256	ANG/APOA2/APOH/APOC3/APOC1/APOE/APOC2/APOA1/AADAC/APOB/APOA4	11
GO:0009163	nucleoside biosynthetic process	11/341	119/16672	3.28607e-05	0.000368777	0.000259256	ADSL/ADSS/ALDOA/AK1/AK4/AMD1/APRT/ADA/ADK/AK2/ACAT1	11
GO:0006942	regulation of striated muscle contraction	9/341	79/16672	3.29401e-05	0.000368777	0.000259256	ADORA1/ATP1B1/ANK2/ADRA1B/ACTN3/ATP1A2/GRK2/ADRA1A/ATP1A1	9
GO:0045907	positive regulation of vasoconstriction	6/341	31/16672	3.34865e-05	0.000373821	0.000262802	AKT1/ADRA1B/ABL1/ADRA1D/ADRA1A/ADRA2C	6
GO:1903531	negative regulation of secretion by cell	13/341	165/16672	3.5526e-05	0.000395128	0.000277781	ANGPT1/ABR/ADORA1/APOA2/ADRA2A/ANXA1/ADRA2B/APOA1/ADRA2C/ABAT/ANXA4/ASIC1/AGTR2	13
GO:0048771	tissue remodeling	12/341	142/16672	3.5598e-05	0.000395128	0.000277781	ABR/ACVR2B/ADAM8/AGER/JAG1/ANXA1/ADRB2/ARG1/ACP5/AGT/ACVRL1/AGTR2	12
GO:0001667	ameboidal-type cell migration	19/341	322/16672	3.77187e-05	0.000417478	0.000293493	ANGPT1/AKT1/RHOA/ARHGDIB/APOH/APOE/ANXA3/ARSB/ACVR1B/ACVR1/ANGPT2/APOA1/AGT/ARHGAP4/ACVRL1/RHOB/ALOX12/AAMP/AGTR2	19
GO:0014074	response to purine-containing compound	12/341	143/16672	3.81575e-05	0.000421137	0.000296066	ASS1/AQP8/APP/ALDH3A1/AQP9/ADSS/AANAT/BIRC2/AGXT/APEX1/AREG/AQP1	12
GO:1901659	glycosyl compound biosynthetic process	11/341	121/16672	3.83773e-05	0.000422367	0.00029693	ADSL/ADSS/ALDOA/AK1/AK4/AMD1/APRT/ADA/ADK/AK2/ACAT1	11
GO:0010466	negative regulation of peptidase activity	16/341	242/16672	4.03101e-05	0.00044239	0.000311007	APP/AKT1/BIRC2/BIRC3/SERPINA3/BIRC5/AGT/APLP2/A2M/AMBP/SERPINC1/AHSG/ARRB2/AQP1/XIAP/ARRB1	16
GO:1903792	negative regulation of anion transport	5/341	20/16672	4.18526e-05	0.000458027	0.000322	ADORA1/AKT1/AKT2/ABAT/AGTR2	5
GO:0051353	positive regulation of oxidoreductase activity	7/341	47/16672	4.38235e-05	0.000478253	0.000336219	AKT1/APOE/ABL2/ABL1/AGT/AGTR1/AGTR2	7
GO:0060627	regulation of vesicle-mediated transport	22/341	413/16672	4.4303e-05	0.000482135	0.000338948	ANGPT1/ABR/ALOX15/APOC3/ADORA2B/ACTN4/ADRA2A/ANXA1/APOC1/ARF1/ABL2/APOC2/ABL1/ANXA2/ACTN2/AKT2/ARF6/AP1G1/AHSG/ARRB2/ARRB1/BIN1	22
GO:0031623	receptor internalization	9/341	82/16672	4.44507e-05	0.000482396	0.000339132	ANGPT1/GRK3/ADM/ACHE/ARF1/GRK2/ANXA2/ARRB2/ARRB1	9
GO:0061041	regulation of wound healing	11/341	124/16672	4.81419e-05	0.000521003	0.000366273	APOH/AGER/ADRA2A/ANXA1/APOE/ANXA2/ABAT/APCS/SERPINC1/ASIC2/ALOX12	11
GO:0055090	acylglycerol homeostasis	6/341	33/16672	4.86664e-05	0.000523162	0.000367791	APOC3/APOE/APOC4/APOC2/APOA1/APOA4	6
GO:0070328	triglyceride homeostasis	6/341	33/16672	4.86664e-05	0.000523162	0.000367791	APOC3/APOE/APOC4/APOC2/APOA1/APOA4	6
GO:0052547	regulation of peptidase activity	21/341	386/16672	4.87841e-05	0.000523162	0.000367791	APP/AKT1/BIRC2/ASPH/FASLG/BIRC3/SERPINA3/APAF1/FAS/BIRC5/AGT/APLP2/A2M/AMBP/SERPINC1/AHSG/ARRB2/AQP1/ALOX12/XIAP/ARRB1	21
GO:0034330	cell junction organization	16/341	246/16672	4.90897e-05	0.000523162	0.000367791	ACTN1/ACTG1/RHOA/ANG/ANK2/ACTN4/RHOC/APOD/ACTN3/ARHGAP6/ARL2/ACTN2/AGT/ACTB/ACVRL1/APC	16
GO:0006641	triglyceride metabolic process	10/341	103/16672	4.91471e-05	0.000523162	0.000367791	APOA2/APOH/APOC3/APOC1/APOE/APOC2/APOA1/AADAC/APOB/APOA4	10
GO:0050728	negative regulation of inflammatory response	10/341	103/16672	4.91471e-05	0.000523162	0.000367791	ABR/ADORA1/AGER/APOD/APOE/ADCYAP1/ACP5/APOA1/ADA/APCS	10
GO:0034599	cellular response to oxidative stress	15/341	220/16672	4.92834e-05	0.000523183	0.000367806	AKT1/ATF4/ARNTL/AIF1/ANXA1/ARG1/ABL1/ARNT/APEX1/ALDH3B1/APOA4/RHOB/AKR1B1/AQP1/PARP1	15
GO:0071320	cellular response to cAMP	7/341	48/16672	5.04148e-05	0.000526234	0.00036995	ASS1/AQP8/APP/AQP9/AANAT/APEX1/AQP1	7
GO:0032372	negative regulation of sterol transport	4/341	11/16672	5.06513e-05	0.000526234	0.00036995	APOA2/APOC3/APOC1/APOC2	4
GO:0032375	negative regulation of cholesterol transport	4/341	11/16672	5.06513e-05	0.000526234	0.00036995	APOA2/APOC3/APOC1/APOC2	4
GO:0042759	long-chain fatty acid biosynthetic process	4/341	11/16672	5.06513e-05	0.000526234	0.00036995	ALOX15/ALOX12B/ALOX15B/ALOX12	4
GO:0045741	positive regulation of epidermal growth factor-activated receptor activity	4/341	11/16672	5.06513e-05	0.000526234	0.00036995	ADORA1/ADRA2A/ADRA2B/ADRA2C	4
GO:0051955	regulation of amino acid transport	4/341	11/16672	5.06513e-05	0.000526234	0.00036995	ATP1A2/ARG1/ABAT/AGT	4
GO:0061365	positive regulation of triglyceride lipase activity	4/341	11/16672	5.06513e-05	0.000526234	0.00036995	APOH/APOC2/APOA1/APOA4	4
GO:1901568	fatty acid derivative metabolic process	4/341	11/16672	5.06513e-05	0.000526234	0.00036995	ALOX15/ALOX5AP/ALOX5/ALOX12	4
GO:0006887	exocytosis	21/341	389/16672	5.45293e-05	0.000564838	0.00039709	ACTN1/ABR/APP/ALDOA/APOH/ADORA2B/ALB/ACTN4/SERPINA3/ADRA2A/ANXA1/ANXA3/ARF1/ANK1/APOA1/ACTN2/APLP2/A2M/AP1G1/AHSG/A1BG	21
GO:0010631	epithelial cell migration	15/341	222/16672	5.46571e-05	0.000564838	0.00039709	ANGPT1/AKT1/RHOA/APOH/APOE/ANXA3/ARSB/ANGPT2/APOA1/AGT/ACVRL1/RHOB/ALOX12/AAMP/AGTR2	15
GO:0043094	cellular metabolic compound salvage	6/341	34/16672	5.80858e-05	0.000598683	0.000420883	APRT/ADA/AMPD2/ADK/AMPD1/AMPD3	6
GO:0090132	epithelium migration	15/341	225/16672	6.36815e-05	0.000654626	0.000460212	ANGPT1/AKT1/RHOA/APOH/APOE/ANXA3/ARSB/ANGPT2/APOA1/AGT/ACVRL1/RHOB/ALOX12/AAMP/AGTR2	15
GO:0010565	regulation of cellular ketone metabolic process	12/341	151/16672	6.50464e-05	0.000666897	0.000468839	AKT1/APOC3/ANXA1/APOC1/APOC2/ACACB/APOA1/AKT2/ACADVL/APOA4/ACADL/ABCD2	12
GO:0043535	regulation of blood vessel endothelial cell migration	7/341	50/16672	6.60389e-05	0.000673528	0.0004735	ANGPT1/AKT1/RHOA/APOE/ANGPT2/ACVRL1/AGTR2	7
GO:1902305	regulation of sodium ion transmembrane transport	7/341	50/16672	6.60389e-05	0.000673528	0.0004735	ATP1B1/ACTN4/ATP1B3/ATP1A2/ANK3/ARF1/ATP1B2	7
GO:0086064	cell communication by electrical coupling involved in cardiac conduction	5/341	22/16672	6.87358e-05	0.000699203	0.00049155	ATP1B1/ATP1A2/ATP1B2/ATP1A3/ATP1A1	5
GO:0046683	response to organophosphorus	11/341	129/16672	6.91728e-05	0.000699993	0.000492105	ASS1/AQP8/APP/ALDH3A1/AQP9/AANAT/BIRC2/AGXT/APEX1/AREG/AQP1	11
GO:0071248	cellular response to metal ion	11/341	129/16672	6.91728e-05	0.000699993	0.000492105	ALOX15/AQP2/ATF4/ALOX5AP/ANK3/AOC1/ADCY1/FAS/ALAD/AQP1/PARP1	11
GO:0009144	purine nucleoside triphosphate metabolic process	16/341	254/16672	7.18382e-05	0.000723208	0.000508427	ALDOA/ATP1B1/AK1/ACTN3/ATP1A2/AK4/ADCYAP1/ALDOC/ARNT/ADA/AMPD2/ADK/AK2/AMPD3/ALDOB/PARP1	16
GO:0071496	cellular response to external stimulus	16/341	254/16672	7.18382e-05	0.000723208	0.000508427	AKT1/AQP2/ATF4/ADORA2B/ALB/AIF1/ATP1A2/ASNS/AOC1/AES/FAS/AGT/ATP1A1/ATF3/ASGR1/AQP1	16
GO:0048511	rhythmic process	18/341	310/16672	7.40829e-05	0.00074325	0.000522516	ADORA1/AANAT/ANG/AMH/ATF4/ARNTL/ANXA1/ZFHX3/ADCYAP1/AGRP/ADCY1/FAS/ADA/AHR/ARRB2/AFP/ARRB1/AHCY	18
GO:0031214	biomineral tissue development	11/341	130/16672	7.42106e-05	0.00074325	0.000522516	ASGR2/ACVR2B/ALOX15/ADRB2/ACVR1/ALPL/AMELY/AMBN/ACVR2A/AMELX/AHSG	11
GO:0000050	urea cycle	4/341	12/16672	7.47536e-05	0.00074677	0.00052499	ASS1/ASL/ARG2/ARG1	4
GO:0010657	muscle cell apoptotic process	7/341	51/16672	7.52172e-05	0.000749479	0.000526895	APOH/APAF1/ADCYAP1/AGT/ARRB2/ALOX12/ARRB1	7
GO:0071396	cellular response to lipid	24/341	490/16672	7.56461e-05	0.00075183	0.000528548	ASS1/ADCY2/AKT1/NR0B1/ADCY5/ADCY3/ARNTL/AR/ANXA1/ATP1A2/ADCYAP1/ABL2/ARG1/ABL1/ADCY6/ADCY1/ABCA1/ATP1A3/ATP1A1/ARRB2/AQP1/PARP1/ALOX12/AGTR2	24
GO:0086009	membrane repolarization	6/341	36/16672	8.12773e-05	0.000801662	0.00056358	ATP1B1/ANK2/ATP1B3/ATP1A2/ATP1B2/ATP1A1	6
GO:1900274	regulation of phospholipase C activity	6/341	36/16672	8.12773e-05	0.000801662	0.00056358	ANG/ABL2/ABL1/ADRA1A/AGT/ADCYAP1R1	6
GO:1901016	regulation of potassium ion transmembrane transporter activity	6/341	36/16672	8.12773e-05	0.000801662	0.00056358	ATP1B1/ANK2/ATP1B3/ANK3/ATP1B2/ACTN2	6
GO:0032102	negative regulation of response to external stimulus	16/341	257/16672	8.2501e-05	0.000811677	0.000570621	ABR/ADORA1/APOH/AGER/AIF1/APOD/APOE/ADCYAP1/ACP5/ANGPT2/ANXA2/APOA1/ADA/ABAT/APCS/ALOX12	16
GO:0042391	regulation of membrane potential	19/341	342/16672	8.4555e-05	0.000829789	0.000583354	ADORA1/ATP1B1/ANK2/ATP1B3/ATP1A2/ANK3/ADCYAP1/ABL1/ATP1B2/ACTN2/ADRA1A/ATP1A4/ATP1A3/ABAT/ASIC1/ATP1A1/ASIC2/PARP1/ALOX12	19
GO:0002526	acute inflammatory response	11/341	132/16672	8.52346e-05	0.000834357	0.000586565	ASS1/ADORA1/ADAM8/APOA2/SERPINA3/ADCYAP1/ACVR1/APCS/A2M/SERPINC1/AHSG	11
GO:0042445	hormone metabolic process	13/341	180/16672	8.72476e-05	0.000851922	0.000598914	AANAT/ADM/ALDH1A3/ASMT/ALDH9A1/ARNT/ALDH1A1/AGT/ADH4/ADH7/AKR1B1/ATP1A1/AFP	13
GO:0032844	regulation of homeostatic process	22/341	433/16672	8.8882e-05	0.00086571	0.000608608	ADORA1/ADAM8/ATM/ADCY5/ANK2/ADRA2A/ANXA1/ATP1A2/ANK3/ABL1/ACVR1B/ARNT/ADA/ABAT/AGT/ADCYAP1R1/ACVR2A/PARP1/ALOX12/ARRB1/AGTR1/AGTR2	22
GO:1901616	organic hydroxy compound catabolic process	7/341	53/16672	9.67013e-05	0.000939522	0.000660498	ALDH1B1/ALDH2/APOE/ALDH3B2/ALDH3B1/ADH4/ADH7	7
GO:0015711	organic anion transport	18/341	317/16672	9.84123e-05	0.000953767	0.000670513	ADORA1/AQP9/AKT1/APBA1/PLIN2/AGXT/ALB/ANXA1/APOE/ATP1A2/ACACB/ABCD1/AKT2/ABAT/ACACA/AQP1/ABCD2/AGTR2	18
GO:0023061	signal release	21/341	406/16672	0.000100024	0.000964589	0.000678121	ADORA1/ACVR2B/ADM/APBA1/ADCY5/ARNTL/ADRA2A/ANXA1/ADRA2B/ADCYAP1/SLC25A6/ARL2/SLC25A4/ADRA2C/ABAT/AGT/ASIC1/ARRB1/AGTR1/AGTR2/SLC25A5	21
GO:0048732	gland development	21/341	406/16672	0.000100024	0.000964589	0.000678121	ASS1/AKT1/NR0B1/AR/ANXA1/ARHGAP5/AK4/ADCYAP1/ASNS/ARG1/ABL1/APOA1/ALOX15B/AKT2/APRT/ADA/ARF6/AREG/ASCL1/SERPINC1/ACAT1	21
GO:0009135	purine nucleoside diphosphate metabolic process	9/341	91/16672	0.000101213	0.000971243	0.000682799	ALDOA/AK1/ACTN3/AK4/ALDOC/ARNT/AK2/AMPD3/ALDOB	9
GO:0009179	purine ribonucleoside diphosphate metabolic process	9/341	91/16672	0.000101213	0.000971243	0.000682799	ALDOA/AK1/ACTN3/AK4/ALDOC/ARNT/AK2/AMPD3/ALDOB	9
GO:0060048	cardiac muscle contraction	10/341	113/16672	0.000108033	0.00103414	0.000727017	ADORA1/ATP1B1/ANK2/ADRA1B/ATP1A2/GRK2/ADRA1A/ATP1A3/ATP1A1/ACTC1	10
GO:0051937	catecholamine transport	7/341	54/16672	0.000109178	0.00104254	0.000732923	ADRA2A/ADRA2B/GRK2/ADRA2C/ABAT/AGT/AGTR2	7
GO:1901565	organonitrogen compound catabolic process	19/341	350/16672	0.000114511	0.00109079	0.000766845	ASL/AGXT/ARG1/ARSB/ANPEP/APOBEC1/ADA/ABAT/AMBP/ACADSB/ACADL/AMPD3/ACAN/AOX1/AMT/ACAT1/ACY1/ASPA/AHCY	19
GO:0001525	angiogenesis	21/341	411/16672	0.000118669	0.00112765	0.000792755	ANGPT1/RHOA/ADAM8/ANG/ADM/APOH/FASLG/JAG1/APOD/ANXA3/ANPEP/ACVR1/ANGPT2/ANXA2/AGT/KLK3/ACVRL1/RHOB/AQP1/ALOX12/AAMP	21
GO:0043534	blood vessel endothelial cell migration	8/341	73/16672	0.000119272	0.00113062	0.000794841	ANGPT1/AKT1/RHOA/APOE/ANGPT2/APOA1/ACVRL1/AGTR2	8
GO:0009185	ribonucleoside diphosphate metabolic process	9/341	93/16672	0.000119849	0.00113333	0.000796747	ALDOA/AK1/ACTN3/AK4/ALDOC/ARNT/AK2/AMPD3/ALDOB	9
GO:0007015	actin filament organization	18/341	323/16672	0.000124612	0.00117552	0.000826407	ACTA1/ACTN1/ALOX15/RHOA/ALDOA/ANG/ACTN4/ADD2/AIF1/ARF1/ABL1/ARHGAP6/APOA1/ACTN2/ARF6/ADD1/ARRB1/ACTC1	18
GO:0010596	negative regulation of endothelial cell migration	6/341	39/16672	0.000129296	0.00121676	0.0008554	RHOA/APOH/APOE/ANGPT2/ACVRL1/AGTR2	6
GO:0007176	regulation of epidermal growth factor-activated receptor activity	5/341	25/16672	0.00013186	0.00123196	0.000866085	APP/ADORA1/ADRA2A/ADRA2B/ADRA2C	5
GO:0043537	negative regulation of blood vessel endothelial cell migration	5/341	25/16672	0.00013186	0.00123196	0.000866085	RHOA/APOE/ANGPT2/ACVRL1/AGTR2	5
GO:1901381	positive regulation of potassium ion transmembrane transport	5/341	25/16672	0.00013186	0.00123196	0.000866085	ATP1B1/ANK2/ATP1B3/ATP1B2/ACTN2	5
GO:0002790	peptide secretion	15/341	241/16672	0.000137396	0.00128061	0.000900289	ADORA1/ACVR2B/ADCY5/ARNTL/ADRA2A/ANXA1/ADCYAP1/SLC25A6/ARL2/ABCA1/SLC25A4/ADRA2C/ABAT/ARRB1/SLC25A5	15
GO:0046545	development of primary female sexual characteristics	9/341	95/16672	0.000141273	0.00131047	0.000921283	ANG/AMH/AMHR2/ADCYAP1/ACVR1B/ADCYAP1R1/ARRB2/AFP/ARRB1	9
GO:1904064	positive regulation of cation transmembrane transport	9/341	95/16672	0.000141273	0.00131047	0.000921283	ATP1B1/ANK2/ACTN4/ATP1B3/ANK3/ARF1/ABL1/ATP1B2/ACTN2	9
GO:0001976	neurological system process involved in regulation of systemic arterial blood pressure	4/341	14/16672	0.000146344	0.00134155	0.000943127	ADRA1A/AGT/ASIC2/AGTR2	4
GO:0019627	urea metabolic process	4/341	14/16672	0.000146344	0.00134155	0.000943127	ASS1/ASL/ARG2/ARG1	4
GO:0045717	negative regulation of fatty acid biosynthetic process	4/341	14/16672	0.000146344	0.00134155	0.000943127	APOC3/APOC1/ACADVL/ACADL	4
GO:0045723	positive regulation of fatty acid biosynthetic process	4/341	14/16672	0.000146344	0.00134155	0.000943127	ANXA1/APOC2/APOA1/APOA4	4
GO:0045986	negative regulation of smooth muscle contraction	4/341	14/16672	0.000146344	0.00134155	0.000943127	ADORA1/ADORA2B/ADRB2/ADRA2C	4
GO:0044708	single-organism behavior	20/341	387/16672	0.00014776	0.00135135	0.000950017	APP/ASIP/ADORA1/ADCY3/AMFR/ATP1A2/ADCYAP1/ADCY8/AGRP/ABL1/ADCY1/APRT/ADA/ARCN1/ATP1A3/ABAT/ARF4/ASIC1/ARRB2/AGTR2	20
GO:0043687	post-translational protein modification	6/341	40/16672	0.000149521	0.00136425	0.000959089	ARSD/ARSB/ARSA/ARSE/ARSF/STS	6
GO:0022037	metencephalon development	9/341	96/16672	0.000153129	0.00139391	0.000979938	ABL1/ARCN1/ABAT/PHOX2A/ASCL1/RERE/AARS/ATIC/AGTR2	9
GO:0060135	maternal process involved in female pregnancy	7/341	57/16672	0.000154662	0.00140458	0.000987441	AKT1/AR/ADCY7/ARG1/AGRP/ANGPT2/AKR1B1	7
GO:0090075	relaxation of muscle	5/341	26/16672	0.000160538	0.00145454	0.00102257	ADORA1/ADORA2B/ATP1B1/ATP1A2/ATP1A1	5
GO:0045216	cell-cell junction organization	14/341	218/16672	0.000164918	0.00149076	0.00104803	ACTN1/RHOA/ANG/ANK2/ACTN4/RHOC/APOD/ACTN3/ARHGAP6/ARL2/ACTN2/AGT/ACVRL1/APC	14
GO:0045471	response to ethanol	10/341	119/16672	0.00016619	0.00149879	0.00105367	BIRC2/ADCY7/ADCYAP1/APOBEC1/ABAT/ADCYAP1R1/ADH7/ALAD/ADH6/ACTC1	10
GO:0001974	blood vessel remodeling	6/341	41/16672	0.00017217	0.00154556	0.00108655	ABR/ACVR2B/JAG1/AGT/ACVRL1/AGTR2	6
GO:0045933	positive regulation of muscle contraction	6/341	41/16672	0.00017217	0.00154556	0.00108655	ADRA1B/ADRA1D/ADRA1A/ADA/ABAT/ATP1A1	6
GO:1903034	regulation of response to wounding	11/341	143/16672	0.000174276	0.00156087	0.00109731	APOH/AGER/ADRA2A/ANXA1/APOE/ANXA2/ABAT/APCS/SERPINC1/ASIC2/ALOX12	11
GO:0006820	anion transport	22/341	454/16672	0.000175116	0.00156122	0.00109756	ADORA1/AQP9/AKT1/AQP6/APBA1/PLIN2/AGXT/ALB/ANXA1/APOE/ATP1A2/ACACB/ABCA1/ABCD1/AKT2/ABCC6/ABAT/ACACA/ASNA1/AQP1/ABCD2/AGTR2	22
GO:0051259	protein oligomerization	22/341	454/16672	0.000175116	0.00156122	0.00109756	ADSL/ASL/ALDOA/ACHE/BIRC2/BIRC3/AR/ALOX5AP/AMFR/APAF1/ARG1/ACACB/ANXA2/ACTN2/FAS/ACACA/ANXA6/ACVRL1/ALAD/ASIC1/ACADL/ACAT1	22
GO:0048514	blood vessel morphogenesis	23/341	487/16672	0.000182114	0.0016199	0.00113881	ANGPT1/RHOA/ADAM8/ANG/ADM/APOH/FASLG/JAG1/APOD/APOE/ANXA3/ANPEP/ACVR1/ANGPT2/ANXA2/AGT/KLK3/ACVRL1/APOB/RHOB/AQP1/ALOX12/AAMP	23
GO:0045987	positive regulation of smooth muscle contraction	5/341	27/16672	0.000193745	0.00171943	0.00120879	ADRA1B/ADRA1D/ADRA1A/ADA/ABAT	5
GO:0009141	nucleoside triphosphate metabolic process	16/341	277/16672	0.000196181	0.00173709	0.0012212	ALDOA/ATP1B1/AK1/ACTN3/ATP1A2/AK4/ADCYAP1/ALDOC/ARNT/ADA/AMPD2/ADK/AK2/AMPD3/ALDOB/PARP1	16
GO:0061045	negative regulation of wound healing	7/341	60/16672	0.000214397	0.00189408	0.00133157	APOH/AGER/APOE/ANXA2/ABAT/APCS/ALOX12	7
GO:0015672	monovalent inorganic cation transport	23/341	493/16672	0.000217353	0.00191586	0.00134688	SHROOM2/ADORA1/AKT1/ATF4/ATP1B1/ANK2/ACTN4/ADRA2A/ATP12A/ATP1B3/ADRB2/ATP1A2/ANK3/ARF1/ADCYAP1/ATP1B2/ACTN2/ATP1A4/ATP1A3/ASIC1/ATP1A1/ASIC2/AQP1	23
GO:0046034	ATP metabolic process	14/341	224/16672	0.000218646	0.0019229	0.00135183	ALDOA/ATP1B1/AK1/ACTN3/ATP1A2/AK4/ADCYAP1/ALDOC/ARNT/AMPD2/AK2/AMPD3/ALDOB/PARP1	14
GO:2000273	positive regulation of receptor activity	6/341	43/16672	0.000225557	0.00197922	0.00139142	ADORA1/ADRA2A/ADRA2B/ANXA2/ACTN2/ADRA2C	6
GO:0002697	regulation of immune effector process	17/341	310/16672	0.000231247	0.00202157	0.00142119	AP1B1/ANGPT1/ABR/AP2A1/AP2B1/APOA2/BIRC2/ADORA2B/AP2A2/BIRC3/AGER/ANXA1/ARF1/APOA1/A2M/AP1G1/ARRB2	17
GO:0045909	positive regulation of vasodilation	5/341	28/16672	0.000231941	0.00202157	0.00142119	ADM/ADCYAP1/AGT/ALOX12/AGTR2	5
GO:0070266	necroptotic process	5/341	28/16672	0.000231941	0.00202157	0.00142119	BIRC2/FASLG/BIRC3/FAS/SLC25A4	5
GO:0071241	cellular response to inorganic substance	11/341	149/16672	0.000249783	0.00217222	0.0015271	ALOX15/AQP2/ATF4/ALOX5AP/ANK3/AOC1/ADCY1/FAS/ALAD/AQP1/PARP1	11
GO:0010744	positive regulation of macrophage derived foam cell differentiation	4/341	16/16672	0.0002576	0.00222037	0.00156096	ALOX15B/AGT/APOB/AGTR1	4
GO:0031998	regulation of fatty acid beta-oxidation	4/341	16/16672	0.0002576	0.00222037	0.00156096	AKT1/ACACB/AKT2/ABCD2	4
GO:0055070	copper ion homeostasis	4/341	16/16672	0.0002576	0.00222037	0.00156096	ATOX1/APP/ARF1/XIAP	4
GO:0071941	nitrogen cycle metabolic process	4/341	16/16672	0.0002576	0.00222037	0.00156096	ASS1/ASL/ARG2/ARG1	4
GO:0015833	peptide transport	15/341	256/16672	0.000265069	0.00227971	0.00160267	ADORA1/ACVR2B/ADCY5/ARNTL/ADRA2A/ANXA1/ADCYAP1/SLC25A6/ARL2/ABCA1/SLC25A4/ADRA2C/ABAT/ARRB1/SLC25A5	15
GO:0043154	negative regulation of cysteine-type endopeptidase activity involved in apoptotic process	8/341	82/16672	0.000269737	0.00230966	0.00162373	AKT1/BIRC2/BIRC3/BIRC5/ARRB2/AQP1/XIAP/ARRB1	8
GO:0050688	regulation of defense response to virus	8/341	82/16672	0.000269737	0.00230966	0.00162373	AP1B1/AP2A1/AP2B1/BIRC2/AP2A2/BIRC3/ARF1/AP1G1	8
GO:0000038	very long-chain fatty acid metabolic process	5/341	29/16672	0.000275603	0.00234956	0.00165178	ABCD1/ACADVL/ACAA1/ACOX1/ABCD2	5
GO:0010743	regulation of macrophage derived foam cell differentiation	5/341	29/16672	0.000275603	0.00234956	0.00165178	ABCA1/ALOX15B/AGT/APOB/AGTR1	5
GO:0051047	positive regulation of secretion	18/341	346/16672	0.000290505	0.00246334	0.00173177	ADORA1/ADAM8/ANG/ACHE/ADORA2B/ALOX12B/ARF1/ADCYAP1/ABL1/GRK2/APBB1/ALOX15B/ABAT/AGT/AP1G1/AQP1/ARRB1/AGTR2	18
GO:0010660	regulation of muscle cell apoptotic process	6/341	45/16672	0.000291186	0.00246334	0.00173177	APOH/ADCYAP1/AGT/ARRB2/ALOX12/ARRB1	6
GO:0051055	negative regulation of lipid biosynthetic process	6/341	45/16672	0.000291186	0.00246334	0.00173177	APOC3/APOC1/APOE/ACADVL/ACADL/ATP1A1	6
GO:0006809	nitric oxide biosynthetic process	7/341	63/16672	0.000291479	0.00246334	0.00173177	ASS1/AKT1/AIF1/ARG2/ACP5/AGT/AGTR2	7
GO:0006665	sphingolipid metabolic process	11/341	152/16672	0.00029688	0.00249815	0.00175624	ALDH3A2/ARSD/ALOX12B/ARSB/ARSA/ASAH1/ALDH3B2/ARSE/ARSF/ALDH3B1/STS	11
GO:0097305	response to alcohol	11/341	152/16672	0.00029688	0.00249815	0.00175624	BIRC2/ADCY7/ADCYAP1/ABCA1/APOBEC1/ABAT/ADCYAP1R1/ADH7/ALAD/ADH6/ACTC1	11
GO:0071383	cellular response to steroid hormone stimulus	14/341	232/16672	0.000313267	0.00263036	0.00184918	ASS1/NR0B1/ARNTL/AR/ANXA1/ATP1A2/ADCYAP1/ARG1/ATP1A3/ATP1A1/ARRB2/AQP1/PARP1/AGTR2	14
GO:0000302	response to reactive oxygen species	13/341	205/16672	0.000316953	0.00265559	0.00186692	NUDT2/ANXA1/APOD/APOE/ARG1/ABL1/ADA/APEX1/AREG/APOA4/RHOB/AKR1B1/AQP1	13
GO:0007589	body fluid secretion	8/341	84/16672	0.000318486	0.00266271	0.00187192	ADORA1/ALOX12B/AQP5/ANXA2/APRT/ADA/SERPINC1/AQP1	8
GO:0019915	lipid storage	7/341	64/16672	0.000321618	0.00268313	0.00188628	PLIN2/APOE/APOC4/ACACB/APOA1/ABCA1/APOB	7
GO:0072132	mesenchyme morphogenesis	6/341	46/16672	0.000329171	0.00274028	0.00192646	ACTA1/ACTG2/ACTA2/ACVR1/ACVRL1/ACTC1	6
GO:0031649	heat generation	4/341	17/16672	0.000331455	0.00274755	0.00193157	ADRB2/ADRB1/ABAT/ADRB3	4
GO:0043651	linoleic acid metabolic process	4/341	17/16672	0.000331455	0.00274755	0.00193157	ALOX12B/ABCD1/ALOX15B/ALOX12	4
GO:0001822	kidney development	15/341	262/16672	0.000339434	0.00280771	0.00197387	ANGPT1/ASS1/ACVR2B/AQP2/ARL3/JAG1/ARG2/ACTA2/ANGPT2/AGT/AMPD2/AKR1B1/ACAT1/AGTR1/AGTR2	15
GO:0022600	digestive system process	8/341	85/16672	0.000345426	0.00285123	0.00200446	ACO1/APOA2/SERPINA3/ADRA2A/AQP5/APOA1/APOA4/AQP1	8
GO:0034754	cellular hormone metabolic process	9/341	107/16672	0.000348046	0.00286678	0.00201539	AANAT/ADM/ALDH1A3/ASMT/ALDH1A1/ADH4/ADH7/AKR1B1/AFP	9
GO:0061337	cardiac conduction	10/341	131/16672	0.000363168	0.00298503	0.00209852	ASPH/ATP1B1/ANK2/ATP1B3/ATP1A2/ATP1B2/ATP1A4/ATP1A3/AGT/ATP1A1	10
GO:0086065	cell communication involved in cardiac conduction	6/341	47/16672	0.000370929	0.0030424	0.00213885	ATP1B1/ANK2/ATP1A2/ATP1B2/ATP1A3/ATP1A1	6
GO:0051341	regulation of oxidoreductase activity	8/341	86/16672	0.000374194	0.00306273	0.00215315	AKT1/APOE/ABL2/ABL1/AGT/ACVR2A/AGTR1/AGTR2	8
GO:0071804	cellular potassium ion transport	12/341	182/16672	0.000376424	0.00306809	0.00215692	ATP1B1/ANK2/ATP12A/ATP1B3/ATP1A2/ANK3/ATP1B2/ACTN2/ATP1A4/ATP1A3/ATP1A1/AQP1	12
GO:0071805	potassium ion transmembrane transport	12/341	182/16672	0.000376424	0.00306809	0.00215692	ATP1B1/ANK2/ATP12A/ATP1B3/ATP1A2/ANK3/ATP1B2/ACTN2/ATP1A4/ATP1A3/ATP1A1/AQP1	12
GO:0090207	regulation of triglyceride metabolic process	5/341	31/16672	0.000381333	0.00309837	0.0021782	APOC3/APOC2/APOA1/AADAC/APOA4	5
GO:0051402	neuron apoptotic process	13/341	209/16672	0.000381729	0.00309837	0.0021782	ANGPT1/APP/ADAM8/ATF4/ATM/FASLG/APOE/APAF1/ABL1/FAS/ASCL1/AARS/PARP1	13
GO:0010595	positive regulation of endothelial cell migration	7/341	66/16672	0.000389386	0.0031344	0.00220353	ANGPT1/AKT1/ANXA3/AGT/RHOB/ALOX12/AAMP	7
GO:0032414	positive regulation of ion transmembrane transporter activity	7/341	66/16672	0.000389386	0.0031344	0.00220353	ATP1B1/ANK2/ACTN4/ATP1B3/ANK3/ATP1B2/ACTN2	7
GO:0042440	pigment metabolic process	7/341	66/16672	0.000389386	0.0031344	0.00220353	ASIP/ALAS2/APRT/ADA/AMBP/ALAD/ALAS1	7
GO:0055117	regulation of cardiac muscle contraction	7/341	66/16672	0.000389386	0.0031344	0.00220353	ADORA1/ATP1B1/ANK2/ADRA1B/ATP1A2/ADRA1A/ATP1A1	7
GO:0046660	female sex differentiation	9/341	109/16672	0.000399379	0.00320821	0.00225542	ANG/AMH/AMHR2/ADCYAP1/ACVR1B/ADCYAP1R1/ARRB2/AFP/ARRB1	9
GO:0034767	positive regulation of ion transmembrane transport	9/341	110/16672	0.000427292	0.00341834	0.00240314	ATP1B1/ANK2/ACTN4/ATP1B3/ANK3/ARF1/ABL1/ATP1B2/ACTN2	9
GO:0035023	regulation of Rho protein signal transduction	9/341	110/16672	0.000427292	0.00341834	0.00240314	ABR/ARHGDIB/APOC3/ARHGDIA/APOE/APOA1/ABCA1/ADRA1A/ARRB1	9
GO:0050818	regulation of coagulation	8/341	88/16672	0.000437587	0.00349352	0.002456	APOH/ANXA5/APOE/ANXA2/ABAT/SERPINC1/ASIC2/ALOX12	8
GO:0010955	negative regulation of protein processing	5/341	32/16672	0.000444448	0.0035052	0.00246421	BIRC2/BIRC3/BIRC5/A2M/XIAP	5
GO:0015988	energy coupled proton transmembrane transport, against electrochemical gradient	5/341	32/16672	0.000444448	0.0035052	0.00246421	ATP12A/ATP1A2/ATP1A4/ATP1A3/ATP1A1	5
GO:0015991	ATP hydrolysis coupled proton transport	5/341	32/16672	0.000444448	0.0035052	0.00246421	ATP12A/ATP1A2/ATP1A4/ATP1A3/ATP1A1	5
GO:0034694	response to prostaglandin	5/341	32/16672	0.000444448	0.0035052	0.00246421	AKT1/AANAT/ADCY6/ACACA/APOB	5
GO:0050892	intestinal absorption	5/341	32/16672	0.000444448	0.0035052	0.00246421	ACO1/APOA2/ADRA2A/APOA1/APOA4	5
GO:1903318	negative regulation of protein maturation	5/341	32/16672	0.000444448	0.0035052	0.00246421	BIRC2/BIRC3/BIRC5/A2M/XIAP	5
GO:0007626	locomotory behavior	12/341	186/16672	0.000458157	0.00360602	0.00253509	APP/APBA1/ADCY5/ALDH1A3/ZFHX3/ATP1A2/ARCN1/ATP1A3/ABAT/ASTN1/APBA2/ARRB2	12
GO:0090002	establishment of protein localization to plasma membrane	10/341	135/16672	0.000461549	0.00362539	0.00254871	AKT1/ATP1B1/ANK2/AR/ANK3/ANK1/ANXA2/ACTN2/RHOG/ARF6	10
GO:0015844	monoamine transport	7/341	68/16672	0.000468118	0.00365488	0.00256944	ADRA2A/ADRA2B/GRK2/ADRA2C/ABAT/AGT/AGTR2	7
GO:0046209	nitric oxide metabolic process	7/341	68/16672	0.000468118	0.00365488	0.00256944	ASS1/AKT1/AIF1/ARG2/ACP5/AGT/AGTR2	7
GO:1903035	negative regulation of response to wounding	7/341	68/16672	0.000468118	0.00365488	0.00256944	APOH/AGER/APOE/ANXA2/ABAT/APCS/ALOX12	7
GO:0001676	long-chain fatty acid metabolic process	8/341	89/16672	0.000472403	0.00368096	0.00258777	ALOX15/ALOX12B/ABCD1/ALOX15B/ACAA1/ACADL/ACOX1/ALOX12	8
GO:0008643	carbohydrate transport	12/341	187/16672	0.000480779	0.00373875	0.0026284	AQP8/AQP9/AKT1/AQP2/AQP6/AQP5/AQP3/AKT2/AGT/AQP4/AQP7/AQP1	12
GO:0045861	negative regulation of proteolysis	16/341	301/16672	0.000494449	0.0038374	0.00269775	APP/AKT1/BIRC2/BIRC3/SERPINA3/BIRC5/AGT/APLP2/A2M/AMBP/SERPINC1/AHSG/ARRB2/AQP1/XIAP/ARRB1	16
GO:0033559	unsaturated fatty acid metabolic process	9/341	113/16672	0.000520822	0.00399247	0.00280677	ALOX15/ALOX5AP/ANXA1/ALOX12B/ABCD1/ALOX15B/ALOX5/ACOX1/ALOX12	9
GO:0046148	pigment biosynthetic process	6/341	50/16672	0.000521448	0.00399247	0.00280677	ASIP/ALAS2/APRT/ADA/ALAD/ALAS1	6
GO:0050819	negative regulation of coagulation	6/341	50/16672	0.000521448	0.00399247	0.00280677	APOH/ANXA5/APOE/ANXA2/ABAT/ALOX12	6
GO:0050885	neuromuscular process controlling balance	6/341	50/16672	0.000521448	0.00399247	0.00280677	ABR/APP/ADCY5/ALDH1A3/ABL1/AARS	6
GO:0071385	cellular response to glucocorticoid stimulus	6/341	50/16672	0.000521448	0.00399247	0.00280677	ASS1/ANXA1/ADCYAP1/ARG1/AQP1/AGTR2	6
GO:2000116	regulation of cysteine-type endopeptidase activity	13/341	216/16672	0.000522259	0.00399247	0.00280677	AKT1/BIRC2/ASPH/FASLG/BIRC3/APAF1/FAS/BIRC5/ARRB2/AQP1/ALOX12/XIAP/ARRB1	13
GO:0006144	purine nucleobase metabolic process	4/341	19/16672	0.000522629	0.00399247	0.00280677	ACPP/APRT/ADA/AOX1	4
GO:0090208	positive regulation of triglyceride metabolic process	4/341	19/16672	0.000522629	0.00399247	0.00280677	APOC2/APOA1/AADAC/APOA4	4
GO:1901617	organic hydroxy compound biosynthetic process	11/341	163/16672	0.000538598	0.00410642	0.00288687	ASIP/ALOX15/APOE/APOA1/ADCYAP1R1/APOB/APOA4/AKR1B1/ACLY/ALOX12/AGTR2	11
GO:0009132	nucleoside diphosphate metabolic process	9/341	114/16672	0.000555494	0.00421873	0.00296583	ALDOA/AK1/ACTN3/AK4/ALDOC/ARNT/AK2/AMPD3/ALDOB	9
GO:0042476	odontogenesis	9/341	114/16672	0.000555494	0.00421873	0.00296583	ACVR2B/AQP6/ADM/AQP5/AQP3/ALPL/AMBN/AMELX/AQP1	9
GO:0009894	regulation of catabolic process	22/341	494/16672	0.000558134	0.00423053	0.00297413	ADORA1/AKT1/ADAM8/APOA2/ARAF/APOC3/ADRA2A/ADRB2/APOC1/ACTN3/APOE/APAF1/APOC2/ACACB/ANXA2/ARNT/APOA1/AKT2/AADAC/APOA4/ABCD2/APC	22
GO:1901605	alpha-amino acid metabolic process	12/341	191/16672	0.000580919	0.00439468	0.00308952	ASS1/ADSS/ASL/AGXT/ARG2/ASNS/ARG1/ART4/AMT/ACAT1/ASPA/AHCY	12
GO:0072001	renal system development	15/341	276/16672	0.000585693	0.00441589	0.00310444	ANGPT1/ASS1/ACVR2B/AQP2/ARL3/JAG1/ARG2/ACTA2/ANGPT2/AGT/AMPD2/AKR1B1/ACAT1/AGTR1/AGTR2	15
GO:0009205	purine ribonucleoside triphosphate metabolic process	14/341	247/16672	0.000586957	0.00441589	0.00310444	ALDOA/ATP1B1/AK1/ACTN3/ATP1A2/AK4/ADCYAP1/ALDOC/ARNT/AMPD2/AK2/AMPD3/ALDOB/PARP1	14
GO:0042158	lipoprotein biosynthetic process	8/341	92/16672	0.000590549	0.00441589	0.00310444	APOA2/APOE/ALOX12B/APOA1/ABCA1/APOBEC1/APOB/APOA4	8
GO:0046939	nucleotide phosphorylation	8/341	92/16672	0.000590549	0.00441589	0.00310444	ALDOA/AK1/ACTN3/AK4/ALDOC/ARNT/AK2/ALDOB	8
GO:0010742	macrophage derived foam cell differentiation	5/341	34/16672	0.000593923	0.00441589	0.00310444	ABCA1/ALOX15B/AGT/APOB/AGTR1	5
GO:0010863	positive regulation of phospholipase C activity	5/341	34/16672	0.000593923	0.00441589	0.00310444	ANG/ABL2/ADRA1A/AGT/ADCYAP1R1	5
GO:0045823	positive regulation of heart contraction	5/341	34/16672	0.000593923	0.00441589	0.00310444	ADM/ADRB1/ADRA1A/ADA/ATP1A1	5
GO:0090077	foam cell differentiation	5/341	34/16672	0.000593923	0.00441589	0.00310444	ABCA1/ALOX15B/AGT/APOB/AGTR1	5
GO:0097300	programmed necrotic cell death	5/341	34/16672	0.000593923	0.00441589	0.00310444	BIRC2/FASLG/BIRC3/FAS/SLC25A4	5
GO:0051186	cofactor metabolic process	18/341	368/16672	0.000603684	0.00447991	0.00314945	ALDOA/ALAS2/ACTN3/ALDOC/ACACB/ARNT/AMD1/ACACA/AMBP/ADH4/ALAD/AKR1B1/ALDOB/ACAT1/ATIC/ACLY/AHCY/ALAS1	18
GO:0043281	regulation of cysteine-type endopeptidase activity involved in apoptotic process	12/341	192/16672	0.000608523	0.0045059	0.00316772	AKT1/BIRC2/FASLG/BIRC3/APAF1/FAS/BIRC5/ARRB2/AQP1/ALOX12/XIAP/ARRB1	12
GO:2001057	reactive nitrogen species metabolic process	7/341	71/16672	0.000609499	0.0045059	0.00316772	ASS1/AKT1/AIF1/ARG2/ACP5/AGT/AGTR2	7
GO:0034764	positive regulation of transmembrane transport	9/341	116/16672	0.000630522	0.00465249	0.00327077	ATP1B1/ANK2/ACTN4/ATP1B3/ANK3/ARF1/ABL1/ATP1B2/ACTN2	9
GO:0035812	renal sodium excretion	4/341	20/16672	0.000642823	0.00471751	0.00331648	ADORA1/AGT/AGTR1/AGTR2	4
GO:0035813	regulation of renal sodium excretion	4/341	20/16672	0.000642823	0.00471751	0.00331648	ADORA1/AGT/AGTR1/AGTR2	4
GO:0006874	cellular calcium ion homeostasis	18/341	370/16672	0.000642966	0.00471751	0.00331648	APP/ADM/ADCY5/ATP1B1/ANK2/ADRA1B/ANXA7/APOE/ATP1A2/ADCYAP1/ABL2/ABL1/ADRA1D/ADRA1A/AGT/ADCYAP1R1/ANXA6/AGTR1	18
GO:0010043	response to zinc ion	6/341	52/16672	0.00064558	0.00471891	0.00331747	ASS1/AANAT/ARG1/APOBEC1/ALAD/PARP1	6
GO:0045428	regulation of nitric oxide biosynthetic process	6/341	52/16672	0.00064558	0.00471891	0.00331747	ASS1/AKT1/AIF1/ACP5/AGT/AGTR2	6
GO:0006687	glycosphingolipid metabolic process	7/341	72/16672	0.000663497	0.00483174	0.00339679	ARSD/ARSB/ARSA/ASAH1/ARSE/ARSF/STS	7
GO:1901606	alpha-amino acid catabolic process	7/341	72/16672	0.000663497	0.00483174	0.00339679	ASL/AGXT/ARG1/AMT/ACAT1/ASPA/AHCY	7
GO:0002090	regulation of receptor internalization	5/341	35/16672	0.000681426	0.00495305	0.00348207	ANGPT1/ARF1/ANXA2/ARRB2/ARRB1	5
GO:0043393	regulation of protein binding	11/341	168/16672	0.000693459	0.00503113	0.00353696	ANGPT1/APP/ADD2/ADRB2/AMFR/ABL1/ANXA2/AES/ADD1/ARRB2/ARRB1	11
GO:0010633	negative regulation of epithelial cell migration	6/341	53/16672	0.00071565	0.00517286	0.0036366	RHOA/APOH/APOE/ANGPT2/ACVRL1/AGTR2	6
GO:0071384	cellular response to corticosteroid stimulus	6/341	53/16672	0.00071565	0.00517286	0.0036366	ASS1/ANXA1/ADCYAP1/ARG1/AQP1/AGTR2	6
GO:0030073	insulin secretion	12/341	196/16672	0.000730212	0.00525815	0.00369656	ACVR2B/ADCY5/ARNTL/ADRA2A/ANXA1/SLC25A6/ARL2/SLC25A4/ADRA2C/ABAT/ARRB1/SLC25A5	12
GO:0043410	positive regulation of MAPK cascade	21/341	471/16672	0.000731135	0.00525815	0.00369656	ANGPT1/ADORA1/ALOX15/ADAM8/ADORA2B/AR/AGER/ADRA2A/ADRA1B/ADRA2B/ADRB2/ALOX12B/ADCYAP1/ABL1/ALK/FAS/ADRA1A/ADRA2C/ADRB3/ARRB2/ARRB1	21
GO:0006805	xenobiotic metabolic process	8/341	95/16672	0.000731498	0.00525815	0.00369656	NAT1/ALDH3A1/AOC2/AOC1/AADAC/AHR/ACY1/NAT2	8
GO:0009199	ribonucleoside triphosphate metabolic process	14/341	253/16672	0.00074289	0.0053302	0.00374721	ALDOA/ATP1B1/AK1/ACTN3/ATP1A2/AK4/ADCYAP1/ALDOC/ARNT/AMPD2/AK2/AMPD3/ALDOB/PARP1	14
GO:0042542	response to hydrogen peroxide	9/341	119/16672	0.000758431	0.0054317	0.00381857	ANXA1/ARG1/ABL1/ADA/APEX1/AREG/RHOB/AKR1B1/AQP1	9
GO:0001701	in utero embryonic development	16/341	314/16672	0.000779397	0.00556527	0.00391247	ANGPT1/ADAR/AKT1/ADM/APBA1/AR/ACVR1B/ACVR1/ARNT/ASCL2/ADA/ACVRL1/APOB/ADD1/APBA2/ADAM10	16
GO:0002021	response to dietary excess	4/341	21/16672	0.000781366	0.00556527	0.00391247	ADRB2/APOE/ADRB1/ADRB3	4
GO:0046688	response to copper ion	4/341	21/16672	0.000781366	0.00556527	0.00391247	AANAT/AQP2/AOC1/AQP1	4
GO:0072659	protein localization to plasma membrane	12/341	198/16672	0.000798312	0.00567559	0.00399003	AKT1/ATP1B1/ANK2/AR/ATP1B3/ANK3/ANK1/ANXA2/ACTN2/AKT2/RHOG/ARF6	12
GO:0051017	actin filament bundle assembly	9/341	120/16672	0.000805487	0.00571617	0.00401856	ACTN1/RHOA/ACTN4/ADD2/AIF1/ARHGAP6/APOA1/ADD1/ARRB1	9
GO:0002791	regulation of peptide secretion	12/341	199/16672	0.000834303	0.00589917	0.00414721	ADORA1/ADCY5/ARNTL/ADRA2A/ADCYAP1/SLC25A6/ARL2/SLC25A4/ADRA2C/ABAT/ARRB1/SLC25A5	12
GO:0032846	positive regulation of homeostatic process	12/341	199/16672	0.000834303	0.00589917	0.00414721	ADAM8/ATM/ANXA1/ABL1/ACVR1B/ARNT/ABAT/AGT/ADCYAP1R1/ACVR2A/ARRB1/AGTR2	12
GO:2000117	negative regulation of cysteine-type endopeptidase activity	8/341	97/16672	0.000839652	0.00592624	0.00416624	AKT1/BIRC2/BIRC3/BIRC5/ARRB2/AQP1/XIAP/ARRB1	8
GO:0032411	positive regulation of transporter activity	7/341	75/16672	0.000848554	0.00596745	0.00419521	ATP1B1/ANK2/ACTN4/ATP1B3/ANK3/ATP1B2/ACTN2	7
GO:0032941	secretion by tissue	7/341	75/16672	0.000848554	0.00596745	0.00419521	ADORA1/ALOX12B/AQP5/APRT/ADA/SERPINC1/AQP1	7
GO:0032970	regulation of actin filament-based process	16/341	317/16672	0.000862113	0.00605188	0.00425456	ALOX15/RHOA/ARHGDIB/ANK2/ARHGDIA/ADD2/ATP1A2/ARF1/ABL2/ABL1/ARHGAP6/APOA1/ACTN2/ARF6/ADD1/ATP1A1	16
GO:0006690	icosanoid metabolic process	8/341	98/16672	0.000898346	0.00629489	0.0044254	ALOX15/ALOX5AP/ANXA1/ALOX12B/ALOX15B/ALOX5/ACOX1/ALOX12	8
GO:0072593	reactive oxygen species metabolic process	13/341	229/16672	0.00090042	0.00629809	0.00442765	ASS1/AKT1/BIRC2/AIF1/ARG2/ACP5/AGT/ARF4/APOA4/AOX1/ALOX12/AGTR1/AGTR2	13
GO:0090087	regulation of peptide transport	12/341	201/16672	0.00091036	0.00631859	0.00444207	ADORA1/ADCY5/ARNTL/ADRA2A/ADCYAP1/SLC25A6/ARL2/SLC25A4/ADRA2C/ABAT/ARRB1/SLC25A5	12
GO:0002739	regulation of cytokine secretion involved in immune response	3/341	10/16672	0.000914704	0.00631859	0.00444207	ANGPT1/APOA2/APOA1	3
GO:0032429	regulation of phospholipase A2 activity	3/341	10/16672	0.000914704	0.00631859	0.00444207	ANG/ANXA1/AGTR1	3
GO:0040015	negative regulation of multicellular organism growth	3/341	10/16672	0.000914704	0.00631859	0.00444207	ADRB2/ADRB1/ADRB3	3
GO:0046501	protoporphyrinogen IX metabolic process	3/341	10/16672	0.000914704	0.00631859	0.00444207	ALAS2/ALAD/ALAS1	3
GO:0070254	mucus secretion	3/341	10/16672	0.000914704	0.00631859	0.00444207	ADORA1/ALOX12B/ADA	3
GO:1990845	adaptive thermogenesis	3/341	10/16672	0.000914704	0.00631859	0.00444207	ADRB2/ADRB1/ADRB3	3
GO:0070301	cellular response to hydrogen peroxide	7/341	76/16672	0.000918543	0.00633388	0.00445282	ANXA1/ARG1/ABL1/APEX1/RHOB/AKR1B1/AQP1	7
GO:0010226	response to lithium ion	4/341	22/16672	0.000939728	0.00644574	0.00453145	ACTA1/ADCY1/FAS/ASCL1	4
GO:0010460	positive regulation of heart rate	4/341	22/16672	0.000939728	0.00644574	0.00453145	ADM/ADRB1/ADRA1A/ADA	4
GO:0090181	regulation of cholesterol metabolic process	4/341	22/16672	0.000939728	0.00644574	0.00453145	APOE/ACADVL/APOB/ACADL	4
GO:0072507	divalent inorganic cation homeostasis	19/341	415/16672	0.000949801	0.00650339	0.00457198	APP/ADM/ADCY5/ATP1B1/ANK2/ADRA1B/ANXA7/APOE/ATP1A2/ANK3/ADCYAP1/ABL2/ABL1/ADRA1D/ADRA1A/AGT/ADCYAP1R1/ANXA6/AGTR1	19
GO:0055074	calcium ion homeostasis	18/341	383/16672	0.000956026	0.00653452	0.00459387	APP/ADM/ADCY5/ATP1B1/ANK2/ADRA1B/ANXA7/APOE/ATP1A2/ADCYAP1/ABL2/ABL1/ADRA1D/ADRA1A/AGT/ADCYAP1R1/ANXA6/AGTR1	18
GO:0071466	cellular response to xenobiotic stimulus	8/341	99/16672	0.000960285	0.00655214	0.00460625	NAT1/ALDH3A1/AOC2/AOC1/AADAC/AHR/ACY1/NAT2	8
GO:0006091	generation of precursor metabolites and energy	17/341	352/16672	0.00097758	0.00665848	0.00468101	ACO1/ADSL/ASIP/AKT1/ALDOA/ACTN3/ALDOC/ARNT/AKT2/ACO2/SLC25A4/AGL/ACADVL/ADRB3/ALDOB/ACOX1/AQP7	17
GO:0061098	positive regulation of protein tyrosine kinase activity	5/341	38/16672	0.00100214	0.00680197	0.00478189	ADORA1/ADRA2A/ADRA2B/ADRA2C/AGT	5
GO:0070169	positive regulation of biomineral tissue development	5/341	38/16672	0.00100214	0.00680197	0.00478189	ACVR2B/ADRB2/ACVR1/ACVR2A/AMELX	5
GO:0008277	regulation of G-protein coupled receptor protein signaling pathway	9/341	124/16672	0.00101809	0.00688624	0.00484113	ADM/ACPP/ADRA2A/ADRB2/ADCYAP1/GRK2/ADA/ARRB2/ARRB1	9
GO:0061572	actin filament bundle organization	9/341	124/16672	0.00101809	0.00688624	0.00484113	ACTN1/RHOA/ACTN4/ADD2/AIF1/ARHGAP6/APOA1/ADD1/ARRB1	9
GO:1901379	regulation of potassium ion transmembrane transport	6/341	57/16672	0.00105648	0.00713352	0.00501497	ATP1B1/ANK2/ATP1B3/ANK3/ATP1B2/ACTN2	6
GO:0030072	peptide hormone secretion	13/341	234/16672	0.00109705	0.00739464	0.00519855	ACVR2B/ADCY5/ARNTL/ADRA2A/ANXA1/ADCYAP1/SLC25A6/ARL2/SLC25A4/ADRA2C/ABAT/ARRB1/SLC25A5	13
GO:0034695	response to prostaglandin E	4/341	23/16672	0.00111938	0.00750623	0.00527699	AKT1/AANAT/ADCY6/ACACA	4
GO:0044062	regulation of excretion	4/341	23/16672	0.00111938	0.00750623	0.00527699	ADORA1/AGT/AGTR1/AGTR2	4
GO:0071379	cellular response to prostaglandin stimulus	4/341	23/16672	0.00111938	0.00750623	0.00527699	AKT1/ADCY6/ACACA/APOB	4
GO:0009314	response to radiation	19/341	421/16672	0.00112376	0.00752262	0.00528851	APP/AKT1/AANAT/ATF4/ATM/ANXA1/ATP1A2/ASNS/AGRP/ANGPT2/ABCA4/APOBEC1/ATP1A3/ALAD/RHOB/ASIC2/AQP1/PARP1/ARRB1	19
GO:0043112	receptor metabolic process	10/341	152/16672	0.00115899	0.00774517	0.00544497	ANGPT1/GRK3/ADM/ACHE/APOE/ARF1/GRK2/ANXA2/ARRB2/ARRB1	10
GO:0060544	regulation of necroptotic process	3/341	11/16672	0.00123872	0.00824969	0.00579965	BIRC2/BIRC3/SLC25A4	3
GO:0060547	negative regulation of necrotic cell death	3/341	11/16672	0.00123872	0.00824969	0.00579965	BIRC2/BIRC3/SLC25A4	3
GO:0032924	activin receptor signaling pathway	5/341	40/16672	0.00127064	0.00841905	0.00591872	ACVR2B/ACVR1B/ACVR1/ACVR2A/ACVRL1	5
GO:0045429	positive regulation of nitric oxide biosynthetic process	5/341	40/16672	0.00127064	0.00841905	0.00591872	ASS1/AKT1/AIF1/AGT/AGTR2	5
GO:1904407	positive regulation of nitric oxide metabolic process	5/341	40/16672	0.00127064	0.00841905	0.00591872	ASS1/AKT1/AIF1/AGT/AGTR2	5
GO:0006909	phagocytosis	13/341	238/16672	0.0012791	0.00846074	0.00594803	ABR/ADORA1/ACTG1/ALOX15/AIF1/ANXA1/ANXA3/ANXA11/ABL1/ABCA1/ACTB/ADORA2A/AHSG	13
GO:0003071	renal system process involved in regulation of systemic arterial blood pressure	4/341	24/16672	0.00132181	0.00866962	0.00609487	ADORA1/AGT/AGTR1/AGTR2	4
GO:0032925	regulation of activin receptor signaling pathway	4/341	24/16672	0.00132181	0.00866962	0.00609487	ACVR2B/ACVR1B/ACVR1/ACVR2A	4
GO:0071549	cellular response to dexamethasone stimulus	4/341	24/16672	0.00132181	0.00866962	0.00609487	ASS1/ARG1/AQP1/AGTR2	4
GO:0072661	protein targeting to plasma membrane	4/341	24/16672	0.00132181	0.00866962	0.00609487	ANK2/ANK3/ANK1/ANXA2	4
GO:2000404	regulation of T cell migration	4/341	24/16672	0.00132181	0.00866962	0.00609487	ADAM8/AIF1/APOD/ADAM10	4
GO:0045765	regulation of angiogenesis	12/341	210/16672	0.0013279	0.00869494	0.00611267	RHOA/ADM/APOH/FASLG/ANXA3/ANGPT2/AGT/KLK3/ACVRL1/RHOB/AQP1/ALOX12	12
GO:0072503	cellular divalent inorganic cation homeostasis	18/341	395/16672	0.00135264	0.00884207	0.00621611	APP/ADM/ADCY5/ATP1B1/ANK2/ADRA1B/ANXA7/APOE/ATP1A2/ADCYAP1/ABL2/ABL1/ADRA1D/ADRA1A/AGT/ADCYAP1R1/ANXA6/AGTR1	18
GO:0002683	negative regulation of immune system process	17/341	363/16672	0.00136413	0.00890226	0.00625842	ANGPT1/ADAR/ABR/ADORA1/ALOX15/APOA2/ATM/ANXA1/APOD/ADCYAP1/APOA1/FAS/ADA/APCS/A2M/AMBP/ARRB2	17
GO:1990778	protein localization to cell periphery	12/341	211/16672	0.00138276	0.00899199	0.00632151	AKT1/ATP1B1/ANK2/AR/ATP1B3/ANK3/ANK1/ANXA2/ACTN2/AKT2/RHOG/ARF6	12
GO:0032835	glomerulus development	6/341	60/16672	0.0013848	0.00899199	0.00632151	ANGPT1/JAG1/ACTA2/ANGPT2/AMPD2/AGTR2	6
GO:0046889	positive regulation of lipid biosynthetic process	6/341	60/16672	0.0013848	0.00899199	0.00632151	AKT1/ANXA1/APOE/APOC2/APOA1/APOA4	6
GO:0045806	negative regulation of endocytosis	5/341	41/16672	0.0014232	0.00922595	0.00648598	APOC3/APOC1/APOC2/ANXA2/ARF6	5
GO:0045137	development of primary sexual characteristics	12/341	213/16672	0.00149811	0.00969539	0.00681601	ANG/AMH/NR0B1/AMHR2/AR/ADCYAP1/ACVR1B/ADCYAP1R1/ACVR2A/ARRB2/AFP/ARRB1	12
GO:1901216	positive regulation of neuron death	6/341	61/16672	0.00150991	0.00975557	0.00685831	ATF4/ATM/FASLG/ABL1/ASCL1/PARP1	6
GO:0035637	multicellular organismal signaling	11/341	185/16672	0.00152148	0.00981407	0.00689944	ASPH/ATP1B1/ANK2/ATP1B3/ATP1A2/ANK3/ATP1B2/ATP1A4/ATP1A3/AGT/ATP1A1	11
GO:0007202	activation of phospholipase C activity	4/341	25/16672	0.00154846	0.00995513	0.00699861	ANG/ADRA1A/AGT/ADCYAP1R1	4
GO:0032365	intracellular lipid transport	4/341	25/16672	0.00154846	0.00995513	0.00699861	ABCA2/ACACB/ABCA1/ACACA	4
GO:0009410	response to xenobiotic stimulus	8/341	107/16672	0.00158861	0.0101811	0.0071575	NAT1/ALDH3A1/AOC2/AOC1/AADAC/AHR/ACY1/NAT2	8
GO:0034260	negative regulation of GTPase activity	5/341	42/16672	0.00158884	0.0101811	0.0071575	RHOH/ADCYAP1/ARL2/ARRB2/ARRB1	5
GO:0002031	G-protein coupled receptor internalization	3/341	12/16672	0.00162671	0.0103557	0.0072802	ADM/ARRB2/ARRB1	3
GO:0038166	angiotensin-activated signaling pathway	3/341	12/16672	0.00162671	0.0103557	0.0072802	ACTN2/AGTR1/AGTR2	3
GO:0051775	response to redox state	3/341	12/16672	0.00162671	0.0103557	0.0072802	ARHGDIB/ARNTL/ADH5	3
GO:1904181	positive regulation of membrane depolarization	3/341	12/16672	0.00162671	0.0103557	0.0072802	ANK3/PARP1/ALOX12	3
GO:0030193	regulation of blood coagulation	7/341	84/16672	0.00165645	0.0104935	0.00737712	APOH/APOE/ANXA2/ABAT/SERPINC1/ASIC2/ALOX12	7
GO:1900046	regulation of hemostasis	7/341	84/16672	0.00165645	0.0104935	0.00737712	APOH/APOE/ANXA2/ABAT/SERPINC1/ASIC2/ALOX12	7
GO:1903409	reactive oxygen species biosynthetic process	7/341	84/16672	0.00165645	0.0104935	0.00737712	ASS1/AKT1/AIF1/ARG2/ACP5/AGT/AGTR2	7
GO:0031329	regulation of cellular catabolic process	17/341	370/16672	0.00167206	0.0105752	0.00743455	AKT1/ADAM8/ARAF/APOC3/ADRA2A/ADRB2/APOE/APAF1/APOC2/ACACB/ANXA2/ARNT/APOA1/AKT2/AADAC/APOA4/ABCD2	17
GO:0031099	regeneration	10/341	160/16672	0.00170405	0.0107601	0.00756452	ADM/APOA2/ANXA1/APOD/APOE/ANXA3/ANGPT2/APOA1/APOA4/ATIC	10
GO:0042446	hormone biosynthetic process	6/341	63/16672	0.00178575	0.0112522	0.00791047	AANAT/ADM/ASMT/ARNT/AKR1B1/ATP1A1	6
GO:0001935	endothelial cell proliferation	8/341	109/16672	0.00178776	0.0112522	0.00791047	AKT1/ANG/APOH/APOE/ARG1/ARNT/APOA1/ACVRL1	8
GO:0032148	activation of protein kinase B activity	4/341	26/16672	0.00180081	0.0112958	0.00794114	ANG/ADRA2A/ADRA2B/ADRA2C	4
GO:0043267	negative regulation of potassium ion transport	4/341	26/16672	0.00180081	0.0112958	0.00794114	ATF4/ANK3/ADCYAP1/ACTN2	4
GO:0016051	carbohydrate biosynthetic process	11/341	189/16672	0.00180339	0.0112958	0.00794114	AP2A1/AKT1/ALDOA/ATF4/ALDOC/AKT2/AGL/ADCYAP1R1/AKR1B1/ALDOB/ATF3	11
GO:0048872	homeostasis of number of cells	12/341	218/16672	0.00182161	0.0113916	0.00800848	ADAR/AKT1/ALAS2/ANXA1/ABL1/ACVR1B/ARNT/FAS/ADA/ACVR2A/ADD1/AMPD3	12
GO:0048608	reproductive structure development	18/341	406/16672	0.00183128	0.0114338	0.00803813	AKT1/ANG/ADM/AMH/NR0B1/AMHR2/BIRC2/AR/ANXA1/ADCYAP1/ARNT/ASCL2/ALOX15B/ADA/ACVR2A/ARRB2/AFP/ARRB1	18
GO:0051262	protein tetramerization	9/341	135/16672	0.00184523	0.0115024	0.00808638	ADSL/ASL/ALDOA/ACHE/ACACB/ANXA2/ACTN2/ACACA/ACADL	9
GO:0050663	cytokine secretion	10/341	162/16672	0.00186854	0.0116291	0.00817543	ANGPT1/APOA2/ANXA1/ABL1/APOA1/ABCA1/ALOX15B/AGT/ANXA4/AGTR2	10
GO:0007623	circadian rhythm	11/341	190/16672	0.00188015	0.0116827	0.00821311	ADORA1/AANAT/ATF4/ARNTL/ZFHX3/AGRP/ADCY1/FAS/ADA/AHR/AHCY	11
GO:0002027	regulation of heart rate	7/341	86/16672	0.00189815	0.0117571	0.00826539	ADM/ANK2/ADRB1/ADRA1A/ADA/AGT/AGTR2	7
GO:0006165	nucleoside diphosphate phosphorylation	7/341	86/16672	0.00189815	0.0117571	0.00826539	ALDOA/AK1/ACTN3/AK4/ALDOC/ARNT/ALDOB	7
GO:0008652	cellular amino acid biosynthetic process	6/341	64/16672	0.00193721	0.011961	0.00840874	ASS1/ASL/AGXT/ASNS/ABAT/ASPA	6
GO:0061097	regulation of protein tyrosine kinase activity	6/341	64/16672	0.00193721	0.011961	0.00840874	APP/ADORA1/ADRA2A/ADRA2B/ADRA2C/AGT	6
GO:0051592	response to calcium ion	8/341	111/16672	0.00200613	0.0123669	0.00869411	ALOX15/AANAT/ALOX5AP/ANXA7/AQP3/ANXA11/ADCY1/APOBEC1	8
GO:0021549	cerebellum development	7/341	87/16672	0.00202881	0.0124673	0.00876467	ABL1/ARCN1/ABAT/RERE/AARS/ATIC/AGTR2	7
GO:0048013	ephrin receptor signaling pathway	7/341	87/16672	0.00202881	0.0124673	0.00876467	AP2A1/ACTG1/RHOA/AP2B1/AP2A2/ACTB/ADAM10	7
GO:0061458	reproductive system development	18/341	410/16672	0.00203757	0.0125014	0.00878867	AKT1/ANG/ADM/AMH/NR0B1/AMHR2/BIRC2/AR/ANXA1/ADCYAP1/ARNT/ASCL2/ALOX15B/ADA/ACVR2A/ARRB2/AFP/ARRB1	18
GO:0007204	positive regulation of cytosolic calcium ion concentration	13/341	251/16672	0.00205304	0.0125035	0.00879019	ADM/ADCY5/ANK2/ADRA1B/ATP1A2/ADCYAP1/ABL2/ABL1/ADRA1D/ADRA1A/AGT/ADCYAP1R1/AGTR1	13
GO:0070997	neuron death	14/341	282/16672	0.00207935	0.0125035	0.00879019	ANGPT1/APP/AKT1/ADAM8/ATF4/ATM/FASLG/APOE/APAF1/ABL1/FAS/ASCL1/AARS/PARP1	14
GO:0010656	negative regulation of muscle cell apoptotic process	4/341	27/16672	0.0020803	0.0125035	0.00879019	APOH/ADCYAP1/ARRB2/ALOX12	4
GO:0042454	ribonucleoside catabolic process	4/341	27/16672	0.0020803	0.0125035	0.00879019	APOBEC1/ADA/AMPD3/AHCY	4
GO:0002374	cytokine secretion involved in immune response	3/341	13/16672	0.00208286	0.0125035	0.00879019	ANGPT1/APOA2/APOA1	3
GO:0002674	negative regulation of acute inflammatory response	3/341	13/16672	0.00208286	0.0125035	0.00879019	ADORA1/ADCYAP1/APCS	3
GO:0006531	aspartate metabolic process	3/341	13/16672	0.00208286	0.0125035	0.00879019	ASS1/ADSS/ASPA	3
GO:0006878	cellular copper ion homeostasis	3/341	13/16672	0.00208286	0.0125035	0.00879019	ATOX1/APP/ARF1	3
GO:0009437	carnitine metabolic process	3/341	13/16672	0.00208286	0.0125035	0.00879019	ACADM/ALDH9A1/ACADL	3
GO:0033197	response to vitamin E	3/341	13/16672	0.00208286	0.0125035	0.00879019	ARG1/ADA/ALAD	3
GO:0033540	fatty acid beta-oxidation using acyl-CoA oxidase	3/341	13/16672	0.00208286	0.0125035	0.00879019	ABCD1/ACAA1/ACOX1	3
GO:0036109	alpha-linolenic acid metabolic process	3/341	13/16672	0.00208286	0.0125035	0.00879019	ABCD1/ACAA1/ACOX1	3
GO:0072350	tricarboxylic acid metabolic process	3/341	13/16672	0.00208286	0.0125035	0.00879019	ACO1/ACO2/ACLY	3
GO:2000651	positive regulation of sodium ion transmembrane transporter activity	3/341	13/16672	0.00208286	0.0125035	0.00879019	ATP1B1/ACTN4/ANK3	3
GO:0034766	negative regulation of ion transmembrane transport	6/341	65/16672	0.00209819	0.0125569	0.00882772	AKT1/ADRA2A/ATP1A2/ANK3/ACTN2/AKT2	6
GO:1903426	regulation of reactive oxygen species biosynthetic process	6/341	65/16672	0.00209819	0.0125569	0.00882772	ASS1/AKT1/AIF1/ACP5/AGT/AGTR2	6
GO:2000021	regulation of ion homeostasis	11/341	193/16672	0.00212653	0.012707	0.00893322	ADORA1/ANK2/ATP1A2/ANK3/ABL1/AGT/ADCYAP1R1/PARP1/ALOX12/AGTR1/AGTR2	11
GO:0030902	hindbrain development	9/341	138/16672	0.00214547	0.0128006	0.00899899	ABL1/ARCN1/ABAT/PHOX2A/ASCL1/RERE/AARS/ATIC/AGTR2	9
GO:0043525	positive regulation of neuron apoptotic process	5/341	45/16672	0.00217086	0.0129125	0.00907766	ATF4/ATM/FASLG/ABL1/ASCL1	5
GO:0050710	negative regulation of cytokine secretion	5/341	45/16672	0.00217086	0.0129125	0.00907766	ANGPT1/APOA2/ANXA1/APOA1/ANXA4	5
GO:0090276	regulation of peptide hormone secretion	11/341	194/16672	0.00221426	0.0131505	0.00924503	ADCY5/ARNTL/ADRA2A/ADCYAP1/SLC25A6/ARL2/SLC25A4/ADRA2C/ABAT/ARRB1/SLC25A5	11
GO:0009895	negative regulation of catabolic process	9/341	140/16672	0.00236638	0.0140326	0.00986515	ADORA1/AKT1/APOA2/APOC3/ADRA2A/APOC1/ACTN3/ACACB/ANXA2	9
GO:0071868	cellular response to monoamine stimulus	4/341	28/16672	0.00238836	0.01412	0.00992655	APP/APLP1/ABL1/ADCY6	4
GO:0071870	cellular response to catecholamine stimulus	4/341	28/16672	0.00238836	0.01412	0.00992655	APP/APLP1/ABL1/ADCY6	4
GO:0070265	necrotic cell death	5/341	46/16672	0.00239545	0.0141404	0.00994094	BIRC2/FASLG/BIRC3/FAS/SLC25A4	5
GO:0050796	regulation of insulin secretion	10/341	168/16672	0.00244037	0.0143838	0.010112	ADCY5/ARNTL/ADRA2A/SLC25A6/ARL2/SLC25A4/ADRA2C/ABAT/ARRB1/SLC25A5	10
GO:1903532	positive regulation of secretion by cell	15/341	319/16672	0.00246999	0.0145364	0.0102193	ADAM8/ANG/ACHE/ADORA2B/ARF1/ADCYAP1/ABL1/GRK2/APBB1/ALOX15B/ABAT/AGT/AP1G1/ARRB1/AGTR2	15
GO:0030048	actin filament-based movement	8/341	115/16672	0.0025056	0.0147237	0.010351	ACTA1/ANK2/ACTN4/ACTN3/ATP1A2/ACTN2/ATP1A1/ACTC1	8
GO:0009896	positive regulation of catabolic process	15/341	320/16672	0.00254463	0.0149306	0.0104964	AKT1/ADAM8/APOA2/ADRA2A/ADRB2/ACTN3/APOE/APOC2/ARNT/APOA1/AKT2/AADAC/APOA4/ABCD2/APC	15
GO:0006520	cellular amino acid metabolic process	14/341	289/16672	0.0026016	0.0151277	0.010635	ASS1/ADSS/ASL/ATF4/AGXT/ARG2/ASNS/ARG1/ART4/ABAT/AMT/AARS/ACY1/ASPA	14
GO:0051260	protein homooligomerization	13/341	258/16672	0.00260862	0.0151277	0.010635	ALDOA/ALOX5AP/APAF1/ARG1/ACACB/ACTN2/FAS/ACACA/ANXA6/ALAD/ASIC1/ACADL/ACAT1	13
GO:0010984	regulation of lipoprotein particle clearance	3/341	14/16672	0.00261099	0.0151277	0.010635	APOC3/APOC1/APOC2	3
GO:0030299	intestinal cholesterol absorption	3/341	14/16672	0.00261099	0.0151277	0.010635	APOA2/APOA1/APOA4	3
GO:0032691	negative regulation of interleukin-1 beta production	3/341	14/16672	0.00261099	0.0151277	0.010635	ACP5/APOA1/ARRB2	3
GO:0032717	negative regulation of interleukin-8 production	3/341	14/16672	0.00261099	0.0151277	0.010635	ANXA1/ANXA4/ARRB1	3
GO:0060712	spongiotrophoblast layer development	3/341	14/16672	0.00261099	0.0151277	0.010635	AKT1/ADM/ASCL2	3
GO:0098856	intestinal lipid absorption	3/341	14/16672	0.00261099	0.0151277	0.010635	APOA2/APOA1/APOA4	3
GO:0007043	cell-cell junction assembly	7/341	91/16672	0.00262237	0.0151277	0.010635	RHOA/ANK2/ACTN4/RHOC/ARL2/AGT/APC	7
GO:0008585	female gonad development	7/341	91/16672	0.00262237	0.0151277	0.010635	ANG/AMH/AMHR2/ADCYAP1/ARRB2/AFP/ARRB1	7
GO:0030195	negative regulation of blood coagulation	5/341	47/16672	0.00263647	0.0151277	0.010635	APOH/APOE/ANXA2/ABAT/ALOX12	5
GO:0031102	neuron projection regeneration	5/341	47/16672	0.00263647	0.0151277	0.010635	ADM/APOD/APOE/APOA1/APOA4	5
GO:0070231	T cell apoptotic process	5/341	47/16672	0.00263647	0.0151277	0.010635	AKT1/ADAM8/FASLG/FAS/ADA	5
GO:1900047	negative regulation of hemostasis	5/341	47/16672	0.00263647	0.0151277	0.010635	APOH/APOE/ANXA2/ABAT/ALOX12	5
GO:1903428	positive regulation of reactive oxygen species biosynthetic process	5/341	47/16672	0.00263647	0.0151277	0.010635	ASS1/AKT1/AIF1/AGT/AGTR2	5
GO:0006643	membrane lipid metabolic process	11/341	199/16672	0.00269806	0.0154583	0.0108674	ALDH3A2/ARSD/ALOX12B/ARSB/ARSA/ASAH1/ALDH3B2/ARSE/ARSF/ALDH3B1/STS	11
GO:0042168	heme metabolic process	4/341	29/16672	0.0027264	0.0155749	0.0109494	ALAS2/AMBP/ALAD/ALAS1	4
GO:0042572	retinol metabolic process	4/341	29/16672	0.0027264	0.0155749	0.0109494	ALDH1A3/ALDH1A1/ADH4/ADH7	4
GO:0030522	intracellular receptor signaling pathway	13/341	260/16672	0.00278822	0.0158814	0.0111649	ALOX15/NR0B1/BIRC2/ARNTL/BIRC3/ACTN4/AR/ARNT/ALOX15B/AHR/ARRB2/PARP1/XIAP	13
GO:0051604	protein maturation	13/341	260/16672	0.00278822	0.0158814	0.0111649	ADAM8/APOH/BIRC2/ASPH/BIRC3/BIRC5/AGA/AGT/A2M/AEBP1/ADAM10/PARP1/XIAP	13
GO:0007045	cell-substrate adherens junction assembly	6/341	69/16672	0.00284491	0.0161571	0.0113587	ACTN1/APOD/ACTN3/ARHGAP6/ACTN2/ACVRL1	6
GO:0048041	focal adhesion assembly	6/341	69/16672	0.00284491	0.0161571	0.0113587	ACTN1/APOD/ACTN3/ARHGAP6/ACTN2/ACVRL1	6
GO:0001936	regulation of endothelial cell proliferation	7/341	93/16672	0.00296509	0.0167907	0.0118041	AKT1/ANG/APOH/APOE/ARG1/ARNT/ACVRL1	7
GO:0070252	actin-mediated cell contraction	7/341	93/16672	0.00296509	0.0167907	0.0118041	ACTA1/ANK2/ACTN3/ATP1A2/ACTN2/ATP1A1/ACTC1	7
GO:1901342	regulation of vasculature development	12/341	232/16672	0.00304368	0.0172107	0.0120994	RHOA/ADM/APOH/FASLG/ANXA3/ANGPT2/AGT/KLK3/ACVRL1/RHOB/AQP1/ALOX12	12
GO:0009064	glutamine family amino acid metabolic process	6/341	70/16672	0.00305921	0.0172485	0.0121259	ASS1/ASL/ARG2/ASNS/ARG1/ART4	6
GO:0071260	cellular response to mechanical stimulus	6/341	70/16672	0.00305921	0.0172485	0.0121259	AKT1/ATP1A2/FAS/AGT/ATP1A1/AQP1	6
GO:0010039	response to iron ion	4/341	30/16672	0.00309581	0.0174142	0.0122424	ACO1/APBB1/ABAT/ALAD	4
GO:0010469	regulation of receptor activity	8/341	119/16672	0.00309755	0.0174142	0.0122424	APP/ADORA1/AGER/ADRA2A/ADRA2B/ANXA2/ACTN2/ADRA2C	8
GO:0001894	tissue homeostasis	11/341	203/16672	0.00314369	0.0176227	0.012389	ACTG1/ADAM8/ALB/SERPINA3/ADRB2/ACP5/ABCA4/ACTB/ACACA/ADD1/AKR1B1	11
GO:1904062	regulation of cation transmembrane transport	11/341	203/16672	0.00314369	0.0176227	0.012389	ATP1B1/ANK2/ACTN4/ADRA2A/ATP1B3/ATP1A2/ANK3/ARF1/ABL1/ATP1B2/ACTN2	11
GO:0016485	protein processing	12/341	233/16672	0.00315166	0.0176421	0.0124026	ADAM8/APOH/BIRC2/ASPH/BIRC3/BIRC5/AGT/A2M/AEBP1/ADAM10/PARP1/XIAP	12
GO:0034390	smooth muscle cell apoptotic process	3/341	15/16672	0.00321465	0.0177902	0.0125068	APOH/ARRB2/ARRB1	3
GO:0034391	regulation of smooth muscle cell apoptotic process	3/341	15/16672	0.00321465	0.0177902	0.0125068	APOH/ARRB2/ARRB1	3
GO:0035930	corticosteroid hormone secretion	3/341	15/16672	0.00321465	0.0177902	0.0125068	AGT/AGTR1/AGTR2	3
GO:0043090	amino acid import	3/341	15/16672	0.00321465	0.0177902	0.0125068	ATP1A2/ARG1/AGT	3
GO:0051044	positive regulation of membrane protein ectodomain proteolysis	3/341	15/16672	0.00321465	0.0177902	0.0125068	ADAM8/ADRA2A/APOE	3
GO:0051895	negative regulation of focal adhesion assembly	3/341	15/16672	0.00321465	0.0177902	0.0125068	APOD/ARHGAP6/ACVRL1	3
GO:0061154	endothelial tube morphogenesis	3/341	15/16672	0.00321465	0.0177902	0.0125068	RHOA/ACVRL1/RHOB	3
GO:2000846	regulation of corticosteroid hormone secretion	3/341	15/16672	0.00321465	0.0177902	0.0125068	AGT/AGTR1/AGTR2	3
GO:0008306	associative learning	6/341	71/16672	0.00328534	0.0180795	0.0127101	APP/ADCY3/ATP1A2/ABL1/ATP1A3/ASIC1	6
GO:0031100	animal organ regeneration	6/341	71/16672	0.00328534	0.0180795	0.0127101	ADM/APOA2/ANXA3/ANGPT2/APOA1/ATIC	6
GO:0034763	negative regulation of transmembrane transport	6/341	71/16672	0.00328534	0.0180795	0.0127101	AKT1/ADRA2A/ATP1A2/ANK3/ACTN2/AKT2	6
GO:2000377	regulation of reactive oxygen species metabolic process	9/341	147/16672	0.00328549	0.0180795	0.0127101	ASS1/AKT1/BIRC2/AIF1/ACP5/AGT/ARF4/AGTR1/AGTR2	9
GO:0051235	maintenance of location	14/341	297/16672	0.00332615	0.0182774	0.0128493	AKT1/PLIN2/ANK2/ALB/APOE/ATP1A2/APOC4/ANK3/ABL1/ACACB/ARL2/APOA1/ABCA1/APOB	14
GO:0002698	negative regulation of immune effector process	7/341	95/16672	0.00334108	0.0183336	0.0128888	ANGPT1/ABR/APOA2/ANXA1/APOA1/A2M/ARRB2	7
GO:0019318	hexose metabolic process	12/341	235/16672	0.00337693	0.0185042	0.0130088	AKT1/ALDOA/ATF4/APOD/ACTN3/ALDOC/ACACB/ALDH1A1/AKT2/AKR1B1/ALDOB/ATF3	12
GO:0043900	regulation of multi-organism process	16/341	363/16672	0.00341164	0.0186682	0.013124	AP1B1/ADAR/AP2A1/ARHGDIB/AP2B1/BIRC2/AP2A2/BIRC3/CRISP1/APOE/ARF1/ACVR1B/ADA/APCS/AP1G1/ADARB1	16
GO:0032496	response to lipopolysaccharide	14/341	298/16672	0.00342732	0.0187277	0.0131658	ASS1/ABR/AKT1/ADM/FASLG/ARG1/ABL1/ACP5/ALPL/ABCA1/FAS/ALAD/APOB/ADH5	14
GO:0006695	cholesterol biosynthetic process	5/341	50/16672	0.0034648	0.0188795	0.0132726	APOE/APOA1/APOB/APOA4/ACLY	5
GO:0086001	cardiac muscle cell action potential	5/341	50/16672	0.0034648	0.0188795	0.0132726	ATP1B1/ANK2/ATP1A2/ANK3/ATP1A1	5
GO:0006007	glucose catabolic process	4/341	31/16672	0.00349796	0.0189542	0.0133251	ALDOA/ACTN3/ALDOC/ALDOB	4
GO:0071548	response to dexamethasone	4/341	31/16672	0.00349796	0.0189542	0.0133251	ASS1/ARG1/AQP1/AGTR2	4
GO:0071867	response to monoamine	4/341	31/16672	0.00349796	0.0189542	0.0133251	APP/APLP1/ABL1/ADCY6	4
GO:0071869	response to catecholamine	4/341	31/16672	0.00349796	0.0189542	0.0133251	APP/APLP1/ABL1/ADCY6	4
GO:0016525	negative regulation of angiogenesis	6/341	72/16672	0.00352369	0.0190671	0.0134044	RHOA/APOH/FASLG/ANGPT2/AGT/KLK3	6
GO:0001889	liver development	8/341	122/16672	0.00360881	0.0194736	0.0136902	ASS1/ANXA1/AK4/ASNS/ARG1/ADA/ARF6/ACAT1	8
GO:0002262	myeloid cell homeostasis	8/341	122/16672	0.00360881	0.0194736	0.0136902	ADAR/ALAS2/ANXA1/ACVR1B/ARNT/ACVR2A/ADD1/AMPD3	8
GO:0045666	positive regulation of neuron differentiation	14/341	300/16672	0.0036372	0.0195996	0.0137788	RHOA/ARHGDIA/ADRA2B/APOE/ARF1/ADCYAP1/ABL2/ARSB/ABL1/APBB1/ATOH1/ADRA2C/ASCL1/ATF1	14
GO:0042594	response to starvation	9/341	150/16672	0.00375645	0.0202143	0.014211	ADSL/ADM/ATF4/ALB/ADCYAP1/ASNS/AOC1/ACAT1/ATF3	9
GO:0010812	negative regulation of cell-substrate adhesion	5/341	51/16672	0.00377826	0.0202756	0.0142541	ACTN4/APOD/ARHGAP6/ANGPT2/ACVRL1	5
GO:1902653	secondary alcohol biosynthetic process	5/341	51/16672	0.00377826	0.0202756	0.0142541	APOE/APOA1/APOB/APOA4/ACLY	5
GO:0006152	purine nucleoside catabolic process	3/341	16/16672	0.00389705	0.0207417	0.0145817	ADA/AMPD3/AHCY	3
GO:0010544	negative regulation of platelet activation	3/341	16/16672	0.00389705	0.0207417	0.0145817	APOE/ABAT/ALOX12	3
GO:0046130	purine ribonucleoside catabolic process	3/341	16/16672	0.00389705	0.0207417	0.0145817	ADA/AMPD3/AHCY	3
GO:0071380	cellular response to prostaglandin E stimulus	3/341	16/16672	0.00389705	0.0207417	0.0145817	AKT1/ADCY6/ACACA	3
GO:1903392	negative regulation of adherens junction organization	3/341	16/16672	0.00389705	0.0207417	0.0145817	APOD/ARHGAP6/ACVRL1	3
GO:1904385	cellular response to angiotensin	3/341	16/16672	0.00389705	0.0207417	0.0145817	ACTN2/AGTR1/AGTR2	3
GO:0006694	steroid biosynthetic process	9/341	151/16672	0.00392468	0.0208602	0.0146651	ADM/NR0B1/APOE/APOA1/APOB/APOA4/AKR1B1/ATP1A1/ACLY	9
GO:2000249	regulation of actin cytoskeleton reorganization	4/341	32/16672	0.00393418	0.0208822	0.0146805	ARHGDIB/ARHGDIA/ABL2/ABL1	4
GO:0007200	phospholipase C-activating G-protein coupled receptor signaling pathway	7/341	98/16672	0.00397194	0.021054	0.0148013	ADRA2A/ADRA1B/ADRA1D/ACTN2/ADRA1A/AGT/AGTR1	7
GO:2000181	negative regulation of blood vessel morphogenesis	6/341	74/16672	0.00403864	0.0213785	0.0150294	RHOA/APOH/FASLG/ANGPT2/AGT/KLK3	6
GO:0030968	endoplasmic reticulum unfolded protein response	8/341	125/16672	0.00418312	0.0220832	0.0155248	ATF4/AMFR/ASNS/ACADVL/ADD1/ASNA1/AARS/ATF3	8
GO:0061008	hepaticobiliary system development	8/341	125/16672	0.00418312	0.0220832	0.0155248	ASS1/ANXA1/AK4/ASNS/ARG1/ADA/ARF6/ACAT1	8
GO:0030282	bone mineralization	7/341	99/16672	0.00420108	0.0221481	0.0155704	ASGR2/ACVR2B/ALOX15/ADRB2/ACVR1/ACVR2A/AHSG	7
GO:0051480	regulation of cytosolic calcium ion concentration	13/341	273/16672	0.00421769	0.0222055	0.0156108	ADM/ADCY5/ANK2/ADRA1B/ATP1A2/ADCYAP1/ABL2/ABL1/ADRA1D/ADRA1A/AGT/ADCYAP1R1/AGTR1	13
GO:0002686	negative regulation of leukocyte migration	4/341	33/16672	0.00440577	0.0231021	0.0162411	ABR/ADORA1/APOD/ADA	4
GO:0044058	regulation of digestive system process	4/341	33/16672	0.00440577	0.0231021	0.0162411	APOA2/APOA1/APOA4/AQP1	4
GO:0098801	regulation of renal system process	4/341	33/16672	0.00440577	0.0231021	0.0162411	ADORA1/AGT/AGTR1/AGTR2	4
GO:0019320	hexose catabolic process	5/341	53/16672	0.00446526	0.0233826	0.0164383	ALDOA/ACTN3/ALDOC/ALDH1A1/ALDOB	5
GO:0030879	mammary gland development	8/341	127/16672	0.00460344	0.0240615	0.0169156	AKT1/AR/ARHGAP5/ARG1/AKT2/APRT/AREG/SERPINC1	8
GO:0070167	regulation of biomineral tissue development	6/341	76/16672	0.00460726	0.0240615	0.0169156	ACVR2B/ADRB2/ACVR1/ACVR2A/AMELX/AHSG	6
GO:0006577	amino-acid betaine metabolic process	3/341	17/16672	0.00466111	0.0242776	0.0170676	ACADM/ALDH9A1/ACADL	3
GO:0055119	relaxation of cardiac muscle	3/341	17/16672	0.00466111	0.0242776	0.0170676	ATP1B1/ATP1A2/ATP1A1	3
GO:0034614	cellular response to reactive oxygen species	8/341	128/16672	0.0048254	0.0250664	0.017622	ANXA1/ARG1/ABL1/APEX1/APOA4/RHOB/AKR1B1/AQP1	8
GO:0034620	cellular response to unfolded protein	8/341	128/16672	0.0048254	0.0250664	0.017622	ATF4/AMFR/ASNS/ACADVL/ADD1/ASNA1/AARS/ATF3	8
GO:0001541	ovarian follicle development	5/341	54/16672	0.00484014	0.0251094	0.0176523	ANG/AMH/ADCYAP1/ARRB2/ARRB1	5
GO:0040017	positive regulation of locomotion	17/341	411/16672	0.00488994	0.0253341	0.0178102	ANGPT1/AKT1/ADAM8/ACTN4/AGER/ADRA2A/AIF1/ANXA3/ACVR1B/ACVR1/AKT2/AGT/RHOB/ADAM10/ALOX12/APC/AAMP	17
GO:0060840	artery development	6/341	77/16672	0.00491268	0.0253576	0.0178268	ACVR2B/AP2B1/JAG1/APOE/ACVRL1/APOB	6
GO:0006084	acetyl-CoA metabolic process	4/341	34/16672	0.00491401	0.0253576	0.0178268	ACACB/ACACA/ACAT1/ACLY	4
GO:0030501	positive regulation of bone mineralization	4/341	34/16672	0.00491401	0.0253576	0.0178268	ACVR2B/ADRB2/ACVR1/ACVR2A	4
GO:0046165	alcohol biosynthetic process	7/341	102/16672	0.00494879	0.0255033	0.0179292	APOE/APOA1/ADCYAP1R1/APOB/APOA4/AKR1B1/ACLY	7
GO:0002237	response to molecule of bacterial origin	14/341	311/16672	0.00498714	0.025667	0.0180443	ASS1/ABR/AKT1/ADM/FASLG/ARG1/ABL1/ACP5/ALPL/ABCA1/FAS/ALAD/APOB/ADH5	14
GO:0005996	monosaccharide metabolic process	12/341	247/16672	0.00501682	0.0257857	0.0181277	AKT1/ALDOA/ATF4/APOD/ACTN3/ALDOC/ACACB/ALDH1A1/AKT2/AKR1B1/ALDOB/ATF3	12
GO:0031668	cellular response to extracellular stimulus	10/341	186/16672	0.00503601	0.0258502	0.0181731	AQP2/ATF4/ADORA2B/ALB/AIF1/ASNS/AOC1/AES/ATF3/ASGR1	10
GO:0071214	cellular response to abiotic stimulus	13/341	279/16672	0.00505236	0.0259	0.0182081	ADSS/AKT1/AQP2/ATF4/ATM/ATP1A2/FAS/AGT/ASCL1/ASIC1/RHOB/ATP1A1/AQP1	13
GO:0010634	positive regulation of epithelial cell migration	7/341	103/16672	0.005219	0.0266701	0.0187495	ANGPT1/AKT1/ANXA3/AGT/RHOB/ALOX12/AAMP	7
GO:0034101	erythrocyte homeostasis	7/341	103/16672	0.005219	0.0266701	0.0187495	ADAR/ALAS2/ACVR1B/ARNT/ACVR2A/ADD1/AMPD3	7
GO:0008154	actin polymerization or depolymerization	10/341	187/16672	0.00522688	0.0266701	0.0187495	ALOX15/ANG/ADD2/AIF1/ARF1/ABL1/ARHGAP6/ACTN2/ARF6/ADD1	10
GO:0009066	aspartate family amino acid metabolic process	5/341	55/16672	0.00523682	0.0266701	0.0187495	ASS1/ADSS/ASNS/ASPA/AHCY	5
GO:0043297	apical junction assembly	5/341	55/16672	0.00523682	0.0266701	0.0187495	RHOA/ACTN4/RHOC/ARL2/APC	5
GO:0002831	regulation of response to biotic stimulus	8/341	130/16672	0.00529385	0.0269254	0.018929	AP1B1/AP2A1/AP2B1/BIRC2/AP2A2/BIRC3/ARF1/AP1G1	8
GO:0043523	regulation of neuron apoptotic process	10/341	188/16672	0.00542338	0.0275123	0.0193416	ANGPT1/ADAM8/ATF4/ATM/FASLG/APOE/ABL1/ASCL1/AARS/PARP1	10
GO:0046578	regulation of Ras protein signal transduction	10/341	188/16672	0.00542338	0.0275123	0.0193416	ABR/ARHGDIB/APOC3/ARHGDIA/APOE/APOA1/ABCA1/ADRA1A/ARF6/ARRB1	10
GO:0042698	ovulation cycle	7/341	104/16672	0.00550013	0.0276609	0.0194461	ANG/AMH/ANXA1/ADCYAP1/ARRB2/AFP/ARRB1	7
GO:0006925	inflammatory cell apoptotic process	3/341	18/16672	0.00550947	0.0276609	0.0194461	FASLG/ANXA1/FAS	3
GO:0035357	peroxisome proliferator activated receptor signaling pathway	3/341	18/16672	0.00550947	0.0276609	0.0194461	ALOX15/ACTN4/ALOX15B	3
GO:0070207	protein homotrimerization	3/341	18/16672	0.00550947	0.0276609	0.0194461	ALOX5AP/ARG1/ASIC1	3
GO:0086012	membrane depolarization during cardiac muscle cell action potential	3/341	18/16672	0.00550947	0.0276609	0.0194461	ANK2/ATP1A2/ANK3	3
GO:0098739	import across plasma membrane	3/341	18/16672	0.00550947	0.0276609	0.0194461	ATP1B1/ATP1A2/ATP1A1	3
GO:1990776	response to angiotensin	3/341	18/16672	0.00550947	0.0276609	0.0194461	ACTN2/AGTR1/AGTR2	3
GO:2000831	regulation of steroid hormone secretion	3/341	18/16672	0.00550947	0.0276609	0.0194461	AGT/AGTR1/AGTR2	3
GO:0034333	adherens junction assembly	6/341	79/16672	0.0055678	0.0279178	0.0196266	ACTN1/APOD/ACTN3/ARHGAP6/ACTN2/ACVRL1	6
GO:0016126	sterol biosynthetic process	5/341	56/16672	0.00565597	0.0283235	0.0199118	APOE/APOA1/APOB/APOA4/ACLY	5
GO:0032956	regulation of actin cytoskeleton organization	13/341	283/16672	0.00567899	0.0284023	0.0199672	ALOX15/RHOA/ARHGDIB/ARHGDIA/ADD2/ARF1/ABL2/ABL1/ARHGAP6/APOA1/ACTN2/ARF6/ADD1	13
GO:0030041	actin filament polymerization	9/341	160/16672	0.00571813	0.0285613	0.020079	ALOX15/ANG/ADD2/AIF1/ARF1/ABL1/ARHGAP6/ARF6/ADD1	9
GO:0045807	positive regulation of endocytosis	7/341	105/16672	0.00579247	0.0288956	0.020314	ANGPT1/ABR/ACTN4/ARF1/AHSG/ARRB2/ARRB1	7
GO:0050792	regulation of viral process	12/341	252/16672	0.00586449	0.0292175	0.0205403	AP1B1/ADAR/AP2A1/AP2B1/BIRC2/AP2A2/BIRC3/APOE/ARF1/APCS/AP1G1/ADARB1	12
GO:0070613	regulation of protein processing	6/341	80/16672	0.00591828	0.0294102	0.0206758	ADAM8/BIRC2/BIRC3/BIRC5/A2M/XIAP	6
GO:1901343	negative regulation of vasculature development	6/341	80/16672	0.00591828	0.0294102	0.0206758	RHOA/APOH/FASLG/ANGPT2/AGT/KLK3	6
GO:0006778	porphyrin-containing compound metabolic process	4/341	36/16672	0.0060454	0.0299655	0.0210662	ALAS2/AMBP/ALAD/ALAS1	4
GO:0046717	acid secretion	4/341	36/16672	0.0060454	0.0299655	0.0210662	AQP9/APBA1/AGXT/ABAT	4
GO:0032410	negative regulation of transporter activity	5/341	57/16672	0.00609823	0.0301889	0.0212233	APOA2/ADRA2A/ATP1A2/ANK3/ACTN2	5
GO:0030335	positive regulation of cell migration	16/341	386/16672	0.00611464	0.0302318	0.0212534	ANGPT1/AKT1/ADAM8/ACTN4/ADRA2A/AIF1/ANXA3/ACVR1B/ACVR1/AKT2/AGT/RHOB/ADAM10/ALOX12/APC/AAMP	16
GO:0032409	regulation of transporter activity	10/341	192/16672	0.00626785	0.03095	0.0217583	APOA2/ATP1B1/ANK2/ACTN4/ADRA2A/ATP1B3/ATP1A2/ANK3/ATP1B2/ACTN2	10
GO:0009063	cellular amino acid catabolic process	6/341	81/16672	0.00628458	0.0309541	0.0217612	ASL/AGXT/ARG1/ABAT/AMT/ASPA	6
GO:1903317	regulation of protein maturation	6/341	81/16672	0.00628458	0.0309541	0.0217612	ADAM8/BIRC2/BIRC3/BIRC5/A2M/XIAP	6
GO:0072006	nephron development	8/341	134/16672	0.00633423	0.0311593	0.0219055	ANGPT1/JAG1/ACTA2/ANGPT2/AGT/AMPD2/ACAT1/AGTR2	8
GO:0007597	blood coagulation, intrinsic pathway	3/341	19/16672	0.0064445	0.0315821	0.0222027	APOH/A2M/SERPINC1	3
GO:0007620	copulation	3/341	19/16672	0.0064445	0.0315821	0.0222027	ADA/ABAT/ACVR2A	3
GO:0034104	negative regulation of tissue remodeling	3/341	19/16672	0.0064445	0.0315821	0.0222027	ABR/AGER/AGT	3
GO:0009612	response to mechanical stimulus	10/341	193/16672	0.00649415	0.0317854	0.0223457	ACTA1/AKT1/ATP1A2/ASNS/ANGPT2/FAS/AGT/ATP1A1/ASIC2/AQP1	10
GO:0060249	anatomical structure homeostasis	15/341	355/16672	0.0066006	0.0322659	0.0226834	ACTG1/ALDOA/ADAM8/ATM/ALB/SERPINA3/ADRB2/ACP5/ABCA4/ACTB/ACACA/APEX1/ADD1/AKR1B1/PARP1	15
GO:0019319	hexose biosynthetic process	6/341	82/16672	0.00666709	0.0323257	0.0227255	ALDOA/ATF4/ALDOC/AKR1B1/ALDOB/ATF3	6
GO:0022602	ovulation cycle process	6/341	82/16672	0.00666709	0.0323257	0.0227255	ANG/AMH/ADCYAP1/ARRB2/AFP/ARRB1	6
GO:0006734	NADH metabolic process	4/341	37/16672	0.00667091	0.0323257	0.0227255	ALDOA/ACTN3/ALDOC/ALDOB	4
GO:0007618	mating	4/341	37/16672	0.00667091	0.0323257	0.0227255	APP/ADA/ABAT/ACVR2A	4
GO:0009112	nucleobase metabolic process	4/341	37/16672	0.00667091	0.0323257	0.0227255	ACPP/APRT/ADA/AOX1	4
GO:0009164	nucleoside catabolic process	4/341	37/16672	0.00667091	0.0323257	0.0227255	APOBEC1/ADA/AMPD3/AHCY	4
GO:0072678	T cell migration	4/341	37/16672	0.00667091	0.0323257	0.0227255	ADAM8/AIF1/APOD/ADAM10	4
GO:0048660	regulation of smooth muscle cell proliferation	7/341	108/16672	0.00673934	0.0326167	0.0229301	AKT1/ANG/AIF1/APOD/AGT/AKR1B1/ALOX12	7
GO:0030534	adult behavior	8/341	136/16672	0.00690923	0.0333975	0.0234789	APP/ASIP/ATP1A2/AGRP/ARCN1/ATP1A3/ABAT/ARRB2	8
GO:0051098	regulation of binding	13/341	290/16672	0.00692404	0.0334276	0.0235001	ANGPT1/APP/AGER/ADD2/ADRB2/AMFR/ABL1/ANXA2/AES/ADD1/ARRB2/PARP1/ARRB1	13
GO:0045926	negative regulation of growth	11/341	226/16672	0.00698139	0.0336211	0.0236362	ADRB2/ADRB1/ACVR1B/APBB2/APBB1/ALOX15B/AGT/ADRB3/ARHGAP4/ACVRL1/AGTR2	11
GO:0051607	defense response to virus	11/341	226/16672	0.00698139	0.0336211	0.0236362	AP1B1/ADAR/AP2A1/AP2B1/BIRC2/AP2A2/BIRC3/ARF1/APOBEC1/AP1G1/ADARB1	11
GO:0046365	monosaccharide catabolic process	5/341	59/16672	0.00705466	0.033932	0.0238547	ALDOA/ACTN3/ALDOC/ALDH1A1/ALDOB	5
GO:2000379	positive regulation of reactive oxygen species metabolic process	6/341	83/16672	0.00706622	0.0339457	0.0238644	ASS1/AKT1/AIF1/AGT/AGTR1/AGTR2	6
GO:0032781	positive regulation of ATPase activity	4/341	38/16672	0.00733782	0.0351638	0.0247207	ATP1B1/ATP1B3/ATP1B2/ALDOB	4
GO:2000401	regulation of lymphocyte migration	4/341	38/16672	0.00733782	0.0351638	0.0247207	ADAM8/AIF1/APOD/ADAM10	4
GO:0003158	endothelium development	7/341	110/16672	0.00743151	0.0352921	0.0248109	ACVR2B/RHOA/JAG1/ACVR1/ACVRL1/RHOB/ALOX12	7
GO:0048659	smooth muscle cell proliferation	7/341	110/16672	0.00743151	0.0352921	0.0248109	AKT1/ANG/AIF1/APOD/AGT/AKR1B1/ALOX12	7
GO:0006006	glucose metabolic process	10/341	197/16672	0.00746352	0.0352921	0.0248109	AKT1/ALDOA/ATF4/APOD/ACTN3/ALDOC/ACACB/AKT2/ALDOB/ATF3	10
GO:0003159	morphogenesis of an endothelium	3/341	20/16672	0.00746832	0.0352921	0.0248109	RHOA/ACVRL1/RHOB	3
GO:0006783	heme biosynthetic process	3/341	20/16672	0.00746832	0.0352921	0.0248109	ALAS2/ALAD/ALAS1	3
GO:0032692	negative regulation of interleukin-1 production	3/341	20/16672	0.00746832	0.0352921	0.0248109	ACP5/APOA1/ARRB2	3
GO:0035929	steroid hormone secretion	3/341	20/16672	0.00746832	0.0352921	0.0248109	AGT/AGTR1/AGTR2	3
GO:0036499	PERK-mediated unfolded protein response	3/341	20/16672	0.00746832	0.0352921	0.0248109	ATF4/ASNS/ATF3	3
GO:0060004	reflex	3/341	20/16672	0.00746832	0.0352921	0.0248109	ALDH1A3/ADRA1A/ASCL1	3
GO:1901889	negative regulation of cell junction assembly	3/341	20/16672	0.00746832	0.0352921	0.0248109	APOD/ARHGAP6/ACVRL1	3
GO:2000406	positive regulation of T cell migration	3/341	20/16672	0.00746832	0.0352921	0.0248109	ADAM8/AIF1/ADAM10	3
GO:0033273	response to vitamin	6/341	84/16672	0.00748235	0.0352921	0.0248109	ARG1/AQP3/ALPL/ADA/ASCL1/ALAD	6
GO:0044070	regulation of anion transport	6/341	84/16672	0.00748235	0.0352921	0.0248109	ADORA1/AKT1/ATP1A2/AKT2/ABAT/AGTR2	6
GO:0048678	response to axon injury	5/341	60/16672	0.0075701	0.0356628	0.0250715	AIF1/APOD/ARG1/APOA1/ARF4	5
GO:0001503	ossification	15/341	361/16672	0.00764949	0.0359933	0.0253038	ADAR/ASGR2/ACVR2B/ALOX15/AKT1/RHOA/ACHE/JAG1/ADRB2/ACVR1/ALPL/ACVR2A/AREG/AMELX/AHSG	15
GO:0007009	plasma membrane organization	12/341	261/16672	0.00767363	0.0360633	0.0253531	AKT1/ATP1B1/ANK2/AR/ATP1B3/ANK3/ANK1/ANXA2/ACTN2/AKT2/RHOG/ARF6	12
GO:0035264	multicellular organism growth	8/341	139/16672	0.00784462	0.0368225	0.0258867	APP/APBA1/AR/ADRB2/ADRB1/ADRB3/ADD1/APBA2	8
GO:0007044	cell-substrate junction assembly	6/341	85/16672	0.00791589	0.0370677	0.0260591	ACTN1/APOD/ACTN3/ARHGAP6/ACTN2/ACVRL1	6
GO:0046916	cellular transition metal ion homeostasis	6/341	85/16672	0.00791589	0.0370677	0.0260591	ACO1/ATOX1/APP/ALAS2/ARF1/ABCB7	6
GO:0006509	membrane protein ectodomain proteolysis	4/341	39/16672	0.00804723	0.0375473	0.0263963	ADAM8/ADRA2A/APOE/ADAM10	4
GO:0030049	muscle filament sliding	4/341	39/16672	0.00804723	0.0375473	0.0263963	ACTA1/ACTN3/ACTN2/ACTC1	4
GO:0033275	actin-myosin filament sliding	4/341	39/16672	0.00804723	0.0375473	0.0263963	ACTA1/ACTN3/ACTN2/ACTC1	4
GO:0033143	regulation of intracellular steroid hormone receptor signaling pathway	5/341	61/16672	0.00811119	0.0377553	0.0265426	NR0B1/ARNTL/AR/ARRB2/PARP1	5
GO:0055006	cardiac cell development	5/341	61/16672	0.00811119	0.0377553	0.0265426	JAG1/ACTN2/AGT/ACTC1/AGTR2	5
GO:0007548	sex differentiation	12/341	263/16672	0.0081296	0.0377958	0.026571	ANG/AMH/NR0B1/AMHR2/AR/ADCYAP1/ACVR1B/ADCYAP1R1/ACVR2A/ARRB2/AFP/ARRB1	12
GO:0015849	organic acid transport	8/341	140/16672	0.00817663	0.0379692	0.0266929	AQP9/AKT1/ALB/ATP1A2/ARG1/AKT2/ABAT/AGT	8
GO:2000147	positive regulation of cell motility	16/341	399/16672	0.0082834	0.0384192	0.0270093	ANGPT1/AKT1/ADAM8/ACTN4/ADRA2A/AIF1/ANXA3/ACVR1B/ACVR1/AKT2/AGT/RHOB/ADAM10/ALOX12/APC/AAMP	16
GO:0001101	response to acid chemical	12/341	264/16672	0.0083654	0.0386699	0.0271855	ASS1/AQP2/ASNS/ABL2/ARG1/AQP3/ABCA1/ASCL1/ALAD/AKR1B1/AARS/AQP1	12
GO:0031532	actin cytoskeleton reorganization	6/341	86/16672	0.00836722	0.0386699	0.0271855	RHOA/ARHGDIB/ARHGDIA/ANXA1/ABL2/ABL1	6
GO:0046364	monosaccharide biosynthetic process	6/341	86/16672	0.00836722	0.0386699	0.0271855	ALDOA/ATF4/ALDOC/AKR1B1/ALDOB/ATF3	6
GO:0035967	cellular response to topologically incorrect protein	8/341	141/16672	0.00851908	0.0392012	0.0275591	ATF4/AMFR/ASNS/ACADVL/ADD1/ASNA1/AARS/ATF3	8
GO:0001649	osteoblast differentiation	10/341	201/16672	0.00854112	0.0392012	0.0275591	ADAR/ACVR2B/AKT1/ACHE/JAG1/ACVR1/ALPL/ACVR2A/AREG/AMELX	10
GO:0055076	transition metal ion homeostasis	7/341	113/16672	0.00856654	0.0392012	0.0275591	ACO1/ATOX1/APP/ALAS2/ARF1/ABCB7/XIAP	7
GO:0010884	positive regulation of lipid storage	3/341	21/16672	0.00858282	0.0392012	0.0275591	APOC4/ACACB/APOB	3
GO:0030325	adrenal gland development	3/341	21/16672	0.00858282	0.0392012	0.0275591	NR0B1/APOA1/ASCL1	3
GO:0042401	cellular biogenic amine biosynthetic process	3/341	21/16672	0.00858282	0.0392012	0.0275591	AANAT/ASMT/AMD1	3
GO:0051000	positive regulation of nitric-oxide synthase activity	3/341	21/16672	0.00858282	0.0392012	0.0275591	AKT1/APOE/AGTR2	3
GO:0051043	regulation of membrane protein ectodomain proteolysis	3/341	21/16672	0.00858282	0.0392012	0.0275591	ADAM8/ADRA2A/APOE	3
GO:0051882	mitochondrial depolarization	3/341	21/16672	0.00858282	0.0392012	0.0275591	ABL1/PARP1/ALOX12	3
GO:0051954	positive regulation of amine transport	3/341	21/16672	0.00858282	0.0392012	0.0275591	GRK2/ABAT/AGT	3
GO:0031331	positive regulation of cellular catabolic process	12/341	265/16672	0.00860652	0.0392634	0.0276028	AKT1/ADAM8/ADRA2A/ADRB2/APOE/APOC2/ARNT/APOA1/AKT2/AADAC/APOA4/ABCD2	12
GO:0051289	protein homotetramerization	5/341	62/16672	0.00867853	0.0395457	0.0278012	ALDOA/ACACB/ACTN2/ACACA/ACADL	5
GO:0044273	sulfur compound catabolic process	4/341	40/16672	0.00880019	0.0400064	0.0281251	ARSB/ACAN/ACAT1/AHCY	4
GO:2000649	regulation of sodium ion transmembrane transporter activity	4/341	40/16672	0.00880019	0.0400064	0.0281251	ATP1B1/ACTN4/ATP1A2/ANK3	4
GO:0050707	regulation of cytokine secretion	8/341	142/16672	0.00887216	0.0402867	0.0283221	ANGPT1/APOA2/ANXA1/ABL1/APOA1/ALOX15B/ANXA4/AGTR2	8
GO:0031589	cell-substrate adhesion	13/341	301/16672	0.00930849	0.0422187	0.0296804	ANGPT1/ACTN1/ALOX15/ACTN4/APOD/ACTN3/ABL1/ARHGAP6/ANGPT2/ARL2/APOA1/ACTN2/ACVRL1	13
GO:0032412	regulation of ion transmembrane transporter activity	9/341	173/16672	0.00935327	0.0423725	0.0297885	ATP1B1/ANK2/ACTN4/ADRA2A/ATP1B3/ATP1A2/ANK3/ATP1B2/ACTN2	9
GO:0009409	response to cold	4/341	41/16672	0.0095977	0.0434293	0.0305315	ADM/ADRB2/ADRB1/ADRB3	4
GO:0002092	positive regulation of receptor internalization	3/341	22/16672	0.00978962	0.0439912	0.0309265	ANGPT1/ARRB2/ARRB1	3
GO:0002719	negative regulation of cytokine production involved in immune response	3/341	22/16672	0.00978962	0.0439912	0.0309265	ANGPT1/APOA2/APOA1	3
GO:0009309	amine biosynthetic process	3/341	22/16672	0.00978962	0.0439912	0.0309265	AANAT/ASMT/AMD1	3
GO:0010882	regulation of cardiac muscle contraction by calcium ion signaling	3/341	22/16672	0.00978962	0.0439912	0.0309265	ATP1B1/ANK2/ATP1A2	3
GO:0060359	response to ammonium ion	3/341	22/16672	0.00978962	0.0439912	0.0309265	ASS1/ADSS/GRK2	3
GO:0072012	glomerulus vasculature development	3/341	22/16672	0.00978962	0.0439912	0.0309265	ANGPT1/ACTA2/ANGPT2	3
GO:0006664	glycolipid metabolic process	7/341	116/16672	0.00982411	0.0440953	0.0309997	ARSD/ARSB/ARSA/ASAH1/ARSE/ARSF/STS	7
GO:0048857	neural nucleus development	5/341	64/16672	0.0098944	0.0443597	0.0311855	RHOA/ALDH1A3/PHOX2A/ACTB/ASCL1	5
GO:0055001	muscle cell development	8/341	145/16672	0.00999714	0.0447688	0.0314732	ACTA1/ACTG1/ADM/ANK2/ACTN2/AGT/ACTC1/AGTR2	8
GO:1905330	regulation of morphogenesis of an epithelium	9/341	175/16672	0.0100397	0.0448922	0.0315599	AP2A1/RHOA/AP2B1/AP2A2/AR/ABL1/AGT/ARRB2/AGTR2	9
GO:0050714	positive regulation of protein secretion	10/341	206/16672	0.0100518	0.0448922	0.0315599	ADAM8/ANG/ACHE/ARF1/ABL1/APBB1/ALOX15B/ABAT/ARRB1/AGTR2	10
GO:0009615	response to virus	13/341	304/16672	0.0100593	0.0448922	0.0315599	AP1B1/ADAR/AP2A1/AP2B1/BIRC2/AP2A2/BIRC3/ACTA2/ARF1/APOBEC1/AP1G1/APOB/ADARB1	13
GO:0051272	positive regulation of cellular component movement	16/341	409/16672	0.0103388	0.046087	0.0323999	ANGPT1/AKT1/ADAM8/ACTN4/ADRA2A/AIF1/ANXA3/ACVR1B/ACVR1/AKT2/AGT/RHOB/ADAM10/ALOX12/APC/AAMP	16
GO:0016052	carbohydrate catabolic process	8/341	146/16672	0.0103947	0.0462479	0.032513	AMY2A/ALDOA/ACTN3/ALDOC/ARNT/ALDH1A1/AGL/ALDOB	8
GO:0016049	cell growth	18/341	481/16672	0.0103987	0.0462479	0.032513	ACTA1/APP/AKT1/ALCAM/AR/APOE/ABL1/ACVR1B/APBB2/APBB1/ADRA1A/AGT/ARHGAP4/ACVRL1/ADAM10/ALOX12/AGTR1/AGTR2	18
GO:0010883	regulation of lipid storage	4/341	42/16672	0.0104407	0.0463821	0.0326073	APOC4/ACACB/ABCA1/APOB	4
GO:1901607	alpha-amino acid biosynthetic process	5/341	65/16672	0.0105441	0.0467878	0.0328926	ASS1/ASL/AGXT/ASNS/AHCY	5
GO:0050769	positive regulation of neurogenesis	15/341	375/16672	0.0106178	0.0470612	0.0330848	RHOA/ARHGDIA/ADRA2B/APOE/ARF1/ADCYAP1/ABL2/ARSB/ABL1/APBB1/ATOH1/ADRA2C/ASCL1/ATF1/BIN1	15
GO:0008406	gonad development	10/341	208/16672	0.01071	0.0474151	0.0333336	ANG/AMH/NR0B1/AMHR2/AR/ADCYAP1/ACVR2A/ARRB2/AFP/ARRB1	10
GO:0034332	adherens junction organization	7/341	118/16672	0.0107341	0.0474151	0.0333336	ACTN1/ANG/APOD/ACTN3/ARHGAP6/ACTN2/ACVRL1	7
GO:1903509	liposaccharide metabolic process	7/341	118/16672	0.0107341	0.0474151	0.0333336	ARSD/ARSB/ARSA/ASAH1/ARSE/ARSF/STS	7
GO:0002685	regulation of leukocyte migration	8/341	147/16672	0.0108039	0.0476691	0.0335121	ABR/ADORA1/ADAM8/AIF1/ANXA1/APOD/ADA/ADAM10	8
GO:0048193	Golgi vesicle transport	13/341	307/16672	0.0108565	0.0478099	0.0336111	AP2A1/ANK2/ARL3/ANK3/ARF1/ANK1/ARCN1/ARF4/AREG/AP1G1/ARF5/ARF3/ARL1	13
GO:0001819	positive regulation of cytokine production	15/341	376/16672	0.0108603	0.0478099	0.0336111	ADAM8/APOA2/ATF4/BIRC2/ADORA2B/BIRC3/AGER/ADRA2A/ANXA1/ADCYAP1/ABL1/ARNT/ALOX15B/AGT/AGTR2	15
GO:0043903	regulation of symbiosis, encompassing mutualism through parasitism	12/341	274/16672	0.0110291	0.0484386	0.0340531	AP1B1/ADAR/AP2A1/AP2B1/BIRC2/AP2A2/BIRC3/APOE/ARF1/APCS/AP1G1/ADARB1	12
GO:0071559	response to transforming growth factor beta	10/341	209/16672	0.0110511	0.0484386	0.0340531	RHOA/AMHR2/ZFHX3/APAF1/ARG1/ABL1/ACVR1/ACVRL1/ARRB2/PARP1	10
GO:0003081	regulation of systemic arterial blood pressure by renin-angiotensin	3/341	23/16672	0.0110902	0.0484386	0.0340531	AGT/AGTR1/AGTR2	3
GO:0007530	sex determination	3/341	23/16672	0.0110902	0.0484386	0.0340531	AMH/NR0B1/AR	3
GO:0034110	regulation of homotypic cell-cell adhesion	3/341	23/16672	0.0110902	0.0484386	0.0340531	ANK3/ABAT/ALOX12	3
GO:0043576	regulation of respiratory gaseous exchange	3/341	23/16672	0.0110902	0.0484386	0.0340531	ADORA1/ATP1A2/PHOX2A	3
GO:0045648	positive regulation of erythrocyte differentiation	3/341	23/16672	0.0110902	0.0484386	0.0340531	ACVR1B/ARNT/ACVR2A	3
GO:0046486	glycerolipid metabolic process	15/341	377/16672	0.0111072	0.0484587	0.0340672	ALOX15/ANG/APOA2/ATM/APOH/APOC3/APOC1/APOE/ARF1/APOC2/APOA1/AADAC/APOB/APOA4/ARF3	15
GO:0022898	regulation of transmembrane transporter activity	9/341	178/16672	0.0111397	0.0485463	0.0341288	ATP1B1/ANK2/ACTN4/ADRA2A/ATP1B3/ATP1A2/ANK3/ATP1B2/ACTN2	9
GO:0030856	regulation of epithelial cell differentiation	7/341	119/16672	0.0112114	0.0487972	0.0343052	ARNTL/AQP3/ATOH1/ALOX15B/ASCL1/ACVRL1/ALOX12	7
GO:0045913	positive regulation of carbohydrate metabolic process	5/341	66/16672	0.0112224	0.0487972	0.0343052	AKT1/ACTN3/ARNT/AKT2/ADCYAP1R1	5
GO:0048512	circadian behavior	4/341	43/16672	0.0113302	0.0491565	0.0345578	ADORA1/ZFHX3/ADA/AHCY	4
GO:1901658	glycosyl compound catabolic process	4/341	43/16672	0.0113302	0.0491565	0.0345578	APOBEC1/ADA/AMPD3/AHCY	4
GO:0007611	learning or memory	10/341	210/16672	0.0114004	0.0494061	0.0347333	APP/ADCY3/AMFR/ATP1A2/ADCY8/ABL1/ADCY1/ATP1A3/ARF4/ASIC1	10
GO:0019886	antigen processing and presentation of exogenous peptide antigen via MHC class II	6/341	92/16672	0.0114704	0.049654	0.0349075	AP1B1/AP2A1/AP2B1/AP2A2/ARF1/AP1G1	6

## Sheet: Sheet3
Enriched GO terms of up-regultd DEGs of RR-MS
ID	Description	GeneRatio	BgRatio	pvalue	p.adjust	qvalue	geneID	Count
GO:0072522	purine-containing compound biosynthetic process	36/320	247/16672	1.51734e-21	5.69155e-18	4.02655e-18	ADCY3/ACR/APLP1/ADCY5/APRT/AK4/ADORA2A/ADRA2A/AK1/ADCY8/AMPD1/ADM/ADSS/ABCA1/ADK/AK2/ADRB2/ACAT1/AQP1/ADA/AMD1/ADORA2B/ADSL/ADCY1/ADCY7/ALDOA/ADRB1/ADCY9/ADRB3/ADCY2/ADCYAP1/ADCY6/AMPD3/ADCYAP1R1/AMPD2/APOE	36
GO:0006164	purine nucleotide biosynthetic process	35/320	236/16672	3.16525e-21	5.93642e-18	4.19978e-18	ADCY3/ACR/APLP1/ADCY5/APRT/AK4/ADORA2A/ADRA2A/AK1/ADCY8/AMPD1/ADM/ADSS/ABCA1/ADK/AK2/ADRB2/ACAT1/AQP1/ADA/ADORA2B/ADSL/ADCY1/ADCY7/ALDOA/ADRB1/ADCY9/ADRB3/ADCY2/ADCYAP1/ADCY6/AMPD3/ADCYAP1R1/AMPD2/APOE	35
GO:0009152	purine ribonucleotide biosynthetic process	34/320	233/16672	2.04753e-20	2.56009e-17	1.81116e-17	ADCY3/ACR/APLP1/ADCY5/APRT/AK4/ADORA2A/ADRA2A/AK1/ADCY8/AMPD1/ADM/ADSS/ABCA1/ADK/AK2/ADRB2/ACAT1/AQP1/ADORA2B/ADSL/ADCY1/ADCY7/ALDOA/ADRB1/ADCY9/ADRB3/ADCY2/ADCYAP1/ADCY6/AMPD3/ADCYAP1R1/AMPD2/APOE	34
GO:0009260	ribonucleotide biosynthetic process	34/320	246/16672	1.19681e-19	1.1223e-16	7.93986e-17	ADCY3/ACR/APLP1/ADCY5/APRT/AK4/ADORA2A/ADRA2A/AK1/ADCY8/AMPD1/ADM/ADSS/ABCA1/ADK/AK2/ADRB2/ACAT1/AQP1/ADORA2B/ADSL/ADCY1/ADCY7/ALDOA/ADRB1/ADCY9/ADRB3/ADCY2/ADCYAP1/ADCY6/AMPD3/ADCYAP1R1/AMPD2/APOE	34
GO:0006067	ethanol metabolic process	12/320	14/16672	1.79099e-19	1.2592e-16	8.90838e-17	ALDH2/ADH1B/ALDH3B2/ALDH3B1/ADH5/ADH1A/ADH6/ALDH1A1/ADH7/ADH1C/ADH4/ALDH1B1	12
GO:0046390	ribose phosphate biosynthetic process	34/320	250/16672	2.01419e-19	1.2592e-16	8.90838e-17	ADCY3/ACR/APLP1/ADCY5/APRT/AK4/ADORA2A/ADRA2A/AK1/ADCY8/AMPD1/ADM/ADSS/ABCA1/ADK/AK2/ADRB2/ACAT1/AQP1/ADORA2B/ADSL/ADCY1/ADCY7/ALDOA/ADRB1/ADCY9/ADRB3/ADCY2/ADCYAP1/ADCY6/AMPD3/ADCYAP1R1/AMPD2/APOE	34
GO:0030104	water homeostasis	20/320	69/16672	1.25766e-18	6.73926e-16	4.76776e-16	ADCY3/ALOX12B/ADCY5/AQP6/ADCY8/AQP5/AQP8/AQP1/AQP7/ADCY1/AQP4/ADCY7/AQP2/AQP9/ALOX12/ADCY9/AQP3/ANXA7/ADCY2/ADCY6	20
GO:0009165	nucleotide biosynthetic process	35/320	297/16672	6.19707e-18	2.90565e-15	2.05563e-15	ADCY3/ACR/APLP1/ADCY5/APRT/AK4/ADORA2A/ADRA2A/AK1/ADCY8/AMPD1/ADM/ADSS/ABCA1/ADK/AK2/ADRB2/ACAT1/AQP1/ADA/ADORA2B/ADSL/ADCY1/ADCY7/ALDOA/ADRB1/ADCY9/ADRB3/ADCY2/ADCYAP1/ADCY6/AMPD3/ADCYAP1R1/AMPD2/APOE	35
GO:1901293	nucleoside phosphate biosynthetic process	35/320	300/16672	8.55565e-18	3.56581e-15	2.52267e-15	ADCY3/ACR/APLP1/ADCY5/APRT/AK4/ADORA2A/ADRA2A/AK1/ADCY8/AMPD1/ADM/ADSS/ABCA1/ADK/AK2/ADRB2/ACAT1/AQP1/ADA/ADORA2B/ADSL/ADCY1/ADCY7/ALDOA/ADRB1/ADCY9/ADRB3/ADCY2/ADCYAP1/ADCY6/AMPD3/ADCYAP1R1/AMPD2/APOE	35
GO:0015850	organic hydroxy compound transport	28/320	197/16672	1.09183e-16	4.09544e-14	2.89736e-14	APOC1/AQP6/APOC2/ADRA2B/ADRA2A/AQP5/AGTR1/AGTR2/ABAT/APOB/AQP8/ABCA2/ABCA1/AQP1/AQP7/APOA4/GRK2/AQP4/APOA1/APOC3/ADRA2C/AQP2/APOA2/ALB/AQP9/AGT/AQP3/APOE	28
GO:0003018	vascular process in circulatory system	25/320	155/16672	2.37465e-16	7.52025e-14	5.32028e-14	ADRA1B/ABR/ADRA2B/ADRA2A/AGTR1/AGTR2/ADRA1A/ACTA2/ADM/ADRB2/AKT1/ADORA2B/ANGPT1/ADORA1/ADRA2C/ADRA1D/ALOX12/ADRB1/AGT/ASIC2/ADRB3/ADCYAP1/ADCY6/ABL1/APOE	25
GO:0007189	adenylate cyclase-activating G-protein coupled receptor signaling pathway	20/320	88/16672	2.40584e-16	7.52025e-14	5.32028e-14	ADCY3/ADRA1B/ADCY5/ADORA2A/ADRA2B/ADRA2A/ADCY8/ADRA1A/ADRB2/ADORA2B/ADCY1/ADCY7/ADRA2C/ADRA1D/ADRB1/ADCY9/ADRB3/ADCY2/ADCYAP1/ADCY6	20
GO:0044282	small molecule catabolic process	35/320	335/16672	2.80691e-16	8.09901e-14	5.72973e-14	ALDH2/ARG1/ALDOC/ACADS/ASL/AMT/ABAT/ACADSB/ACAT1/ALDH3B2/ABCD1/AKT1/ALDH3B1/ACTN3/ALDOB/ACAT2/ABCD2/AKT2/ALDOA/ACADVL/ACAA1/ADH5/ACADM/ALDH1A1/ADH7/ACOX1/ADH4/ASPA/ACADL/ACACB/AGXT/AHCY/ALDH1B1/ALDH3A2/APOE	35
GO:0060191	regulation of lipase activity	19/320	78/16672	3.39463e-16	9.09519e-14	6.43449e-14	ANG/ARL1/APOC1/APOC2/ANXA1/AGTR1/ADRA1A/APOA4/APOA1/APOC3/APOA2/RHOA/AGT/ABL2/RHOC/ARF4/ABL1/APOH/ADCYAP1R1	19
GO:0006069	ethanol oxidation	10/320	12/16672	3.76562e-16	9.41657e-14	6.66185e-14	ALDH2/ADH1B/ADH5/ADH1A/ADH6/ALDH1A1/ADH7/ADH1C/ADH4/ALDH1B1	10
GO:0050880	regulation of blood vessel size	23/320	132/16672	6.70997e-16	1.57307e-13	1.11288e-13	ADRA1B/ADRA2B/ADRA2A/AGTR1/AGTR2/ADRA1A/ACTA2/ADM/ADRB2/AKT1/ADORA2B/ADORA1/ADRA2C/ADRA1D/ALOX12/ADRB1/AGT/ASIC2/ADRB3/ADCYAP1/ADCY6/ABL1/APOE	23
GO:0035150	regulation of tube size	23/320	133/16672	7.97389e-16	1.68812e-13	1.19428e-13	ADRA1B/ADRA2B/ADRA2A/AGTR1/AGTR2/ADRA1A/ACTA2/ADM/ADRB2/AKT1/ADORA2B/ADORA1/ADRA2C/ADRA1D/ALOX12/ADRB1/AGT/ASIC2/ADRB3/ADCYAP1/ADCY6/ABL1/APOE	23
GO:0048871	multicellular organismal homeostasis	34/320	326/16672	8.10084e-16	1.68812e-13	1.19428e-13	ADCY3/ACTG1/ALOX12B/ADCY5/ADCY8/AKR1B1/ABAT/ADAM8/ADRB2/AQP1/ACACA/ADORA1/ADCY1/ACP5/AQP4/ADCY7/ABCA4/ACADVL/AQP2/ALB/ALOX12/ADRB1/ADCY9/AQP3/ADD1/ADRB3/SERPINA3/ADCY2/ACTB/ADCY6/ACADL/ACACB/AMPD3/AMPD2	34
GO:0009992	cellular water homeostasis	10/320	13/16672	1.60418e-15	3.12555e-13	2.2112e-13	AQP6/AQP5/AQP8/AQP1/AQP7/AQP4/AQP2/AQP9/AQP3/ANXA7	10
GO:0090066	regulation of anatomical structure size	40/320	466/16672	1.66652e-15	3.12555e-13	2.2112e-13	ADRA1B/ARF1/AQP6/ADRA2B/ADRA2A/AQP5/AGTR1/AGTR2/ADRA1A/ACTA2/ADM/AQP8/ADRB2/AQP1/AKT1/AQP7/ADORA2B/ADORA1/AQP4/ACTN2/ADRA2C/AQP2/ADRA1D/ARHGAP4/ADD2/AQP9/ALOX12/ADRB1/ARF6/AGT/ASIC2/AQP3/ANXA7/ADD1/ADRB3/ADCYAP1/ADCY6/ABL1/ALOX15/APOE	40
GO:0007190	activation of adenylate cyclase activity	14/320	37/16672	2.84775e-15	5.08663e-13	3.59859e-13	ADCY3/ACR/ADCY5/ADCY8/ADRB2/ADORA2B/ADCY1/ADCY7/ADRB1/ADCY9/ADRB3/ADCY2/ADCYAP1/ADCY6	14
GO:0030819	positive regulation of cAMP biosynthetic process	18/320	76/16672	3.55389e-15	6.05938e-13	4.28677e-13	ADCY3/ACR/ADCY5/ADORA2A/ADCY8/ADM/ABCA1/ADRB2/ADORA2B/ADCY1/ADCY7/ADRB1/ADCY9/ADRB3/ADCY2/ADCYAP1/ADCY6/ADCYAP1R1	18
GO:0045762	positive regulation of adenylate cyclase activity	15/320	46/16672	3.81455e-15	6.22103e-13	4.40113e-13	ADCY3/ACR/ADCY5/ADORA2A/ADCY8/ADRB2/ADORA2B/ADCY1/ADCY7/ADRB1/ADCY9/ADRB3/ADCY2/ADCYAP1/ADCY6	15
GO:0052652	cyclic purine nucleotide metabolic process	23/320	143/16672	4.1272e-15	6.45048e-13	4.56346e-13	ADCY3/ACR/APLP1/ADCY5/ADORA2A/ADRA2A/ADCY8/ADM/ABCA1/ADRB2/AQP1/ADORA2B/ADCY1/ADCY7/ADRB1/ADCY9/ADRB3/ADCY2/ADCYAP1/ADCY6/ADCYAP1R1/AMPD2/APOE	23
GO:0009190	cyclic nucleotide biosynthetic process	23/320	144/16672	4.8275e-15	7.24318e-13	5.12426e-13	ADCY3/ACR/APLP1/ADCY5/ADORA2A/ADRA2A/ADCY8/ADM/ABCA1/ADRB2/AQP1/ADORA2B/ADCY1/ADCY7/ADRB1/ADCY9/ADRB3/ADCY2/ADCYAP1/ADCY6/ADCYAP1R1/AMPD2/APOE	23
GO:0030804	positive regulation of cyclic nucleotide biosynthetic process	19/320	94/16672	1.3808e-14	1.99206e-12	1.40931e-12	ADCY3/ACR/ADCY5/ADORA2A/ADCY8/ADM/ABCA1/ADRB2/ADORA2B/ADCY1/ADCY7/ADRB1/ADCY9/ADRB3/ADCY2/ADCYAP1/ADCY6/ADCYAP1R1/APOE	19
GO:0030816	positive regulation of cAMP metabolic process	18/320	83/16672	1.87726e-14	2.60801e-12	1.84506e-12	ADCY3/ACR/ADCY5/ADORA2A/ADCY8/ADM/ABCA1/ADRB2/ADORA2B/ADCY1/ADCY7/ADRB1/ADCY9/ADRB3/ADCY2/ADCYAP1/ADCY6/ADCYAP1R1	18
GO:0030817	regulation of cAMP biosynthetic process	20/320	109/16672	1.95535e-14	2.61947e-12	1.85317e-12	ADCY3/ACR/APLP1/ADCY5/ADORA2A/ADRA2A/ADCY8/ADM/ABCA1/ADRB2/ADORA2B/ADCY1/ADCY7/ADRB1/ADCY9/ADRB3/ADCY2/ADCYAP1/ADCY6/ADCYAP1R1	20
GO:0007187	G-protein coupled receptor signaling pathway, coupled to cyclic nucleotide second messenger	25/320	190/16672	3.12778e-14	3.86354e-12	2.7333e-12	ADCY3/APLP1/ADRA1B/ADCY5/ANXA1/ADORA2A/ADRA2B/ADRA2A/ADCY8/AGTR2/ADRA1A/ADRB2/ADORA2B/ADORA1/ADCY1/ADCY7/ADRA2C/ADRA1D/ADRB1/AGT/ADCY9/ADRB3/ADCY2/ADCYAP1/ADCY6	25
GO:0045981	positive regulation of nucleotide metabolic process	21/320	126/16672	3.19301e-14	3.86354e-12	2.7333e-12	ADCY3/ACR/ARNT/ADCY5/ADORA2A/ADCY8/ADM/ABCA1/ADRB2/ACTN3/ADORA2B/ADCY1/ADCY7/ADRB1/ADCY9/ADRB3/ADCY2/ADCYAP1/ADCY6/ADCYAP1R1/APOE	21
GO:1900544	positive regulation of purine nucleotide metabolic process	21/320	126/16672	3.19301e-14	3.86354e-12	2.7333e-12	ADCY3/ACR/ARNT/ADCY5/ADORA2A/ADCY8/ADM/ABCA1/ADRB2/ACTN3/ADORA2B/ADCY1/ADCY7/ADRB1/ADCY9/ADRB3/ADCY2/ADCYAP1/ADCY6/ADCYAP1R1/APOE	21
GO:0006171	cAMP biosynthetic process	20/320	112/16672	3.36906e-14	3.94917e-12	2.79388e-12	ADCY3/ACR/APLP1/ADCY5/ADORA2A/ADRA2A/ADCY8/ADM/ABCA1/ADRB2/ADORA2B/ADCY1/ADCY7/ADRB1/ADCY9/ADRB3/ADCY2/ADCYAP1/ADCY6/ADCYAP1R1	20
GO:0030810	positive regulation of nucleotide biosynthetic process	19/320	99/16672	3.76704e-14	4.15594e-12	2.94016e-12	ADCY3/ACR/ADCY5/ADORA2A/ADCY8/ADM/ABCA1/ADRB2/ADORA2B/ADCY1/ADCY7/ADRB1/ADCY9/ADRB3/ADCY2/ADCYAP1/ADCY6/ADCYAP1R1/APOE	19
GO:1900373	positive regulation of purine nucleotide biosynthetic process	19/320	99/16672	3.76704e-14	4.15594e-12	2.94016e-12	ADCY3/ACR/ADCY5/ADORA2A/ADCY8/ADM/ABCA1/ADRB2/ADORA2B/ADCY1/ADCY7/ADRB1/ADCY9/ADRB3/ADCY2/ADCYAP1/ADCY6/ADCYAP1R1/APOE	19
GO:0034308	primary alcohol metabolic process	14/320	44/16672	4.74962e-14	5.09023e-12	3.60114e-12	ALDH2/ALDH1A3/ADH1B/ALDH3B2/ALDH3B1/ADH5/ADH1A/ADH6/ALDH1A1/ADH7/ADH1C/ADH4/ALDH1B1/ALDH3A2	14
GO:0030802	regulation of cyclic nucleotide biosynthetic process	21/320	129/16672	5.18944e-14	5.40711e-12	3.82532e-12	ADCY3/ACR/APLP1/ADCY5/ADORA2A/ADRA2A/ADCY8/ADM/ABCA1/ADRB2/ADORA2B/ADCY1/ADCY7/ADRB1/ADCY9/ADRB3/ADCY2/ADCYAP1/ADCY6/ADCYAP1R1/APOE	21
GO:0071825	protein-lipid complex subunit organization	13/320	36/16672	5.85187e-14	5.93253e-12	4.19703e-12	APOC1/ARF1/APOC2/AGTR1/APOB/ABCA1/APOA4/APOA1/APOC3/APOA2/AGT/BIN1/APOE	13
GO:0050878	regulation of body fluid levels	39/320	495/16672	6.33314e-14	6.25147e-12	4.42267e-12	ADCY3/ACTG1/ALOX12B/ADCY5/APRT/ANXA2/ADORA2A/ANXA5/ADRA2B/ADRA2A/ARRB2/ADCY8/AQP5/A2M/ABAT/AQP1/ADA/AKT1/RHOB/ADORA1/ARRB1/ADCY1/AQP4/ADCY7/ADRA2C/AQP2/RHOA/ALOX12/ASIC2/ADCY9/AQP3/ANXA7/ADCY2/APLNR/ACTB/RHOG/ADCY6/APOH/APOE	39
GO:0015793	glycerol transport	9/320	12/16672	6.61387e-14	6.3373e-12	4.48339e-12	AQP6/AQP5/AQP8/AQP1/AQP7/AQP4/AQP2/AQP9/AQP3	9
GO:0009150	purine ribonucleotide metabolic process	39/320	496/16672	6.75798e-14	6.3373e-12	4.48339e-12	ADCY3/ACR/ARNT/APLP1/ADCY5/ALDOC/APRT/AK4/PARP1/ADORA2A/ADRA2A/AK1/ADCY8/AMPD1/ADM/ADSS/ABCA1/ADK/AK2/ADRB2/ACAT1/AQP1/ACTN3/ALDOB/ADORA2B/ADSL/ADCY1/ADCY7/ALDOA/ADRB1/ADCY9/ADRB3/ADCY2/ADCYAP1/ADCY6/AMPD3/ADCYAP1R1/AMPD2/APOE	39
GO:0030801	positive regulation of cyclic nucleotide metabolic process	19/320	103/16672	8.05359e-14	7.36806e-12	5.21261e-12	ADCY3/ACR/ADCY5/ADORA2A/ADCY8/ADM/ABCA1/ADRB2/ADORA2B/ADCY1/ADCY7/ADRB1/ADCY9/ADRB3/ADCY2/ADCYAP1/ADCY6/ADCYAP1R1/APOE	19
GO:0044242	cellular lipid catabolic process	24/320	183/16672	1.11858e-13	9.99002e-12	7.06755e-12	ACADS/APOC2/ACADSB/APOB/ADRB2/ACAT1/ABCD1/AKT1/APOA4/ACAT2/ABCD2/APOA1/APOC3/AKT2/ACADVL/ACAA1/APOA2/ACADM/ACOX1/ACADL/ACACB/AADAC/ALDH3A2/APOE	24
GO:1900371	regulation of purine nucleotide biosynthetic process	21/320	135/16672	1.31739e-13	1.14919e-11	8.13008e-12	ADCY3/ACR/APLP1/ADCY5/ADORA2A/ADRA2A/ADCY8/ADM/ABCA1/ADRB2/ADORA2B/ADCY1/ADCY7/ADRB1/ADCY9/ADRB3/ADCY2/ADCYAP1/ADCY6/ADCYAP1R1/APOE	21
GO:0045761	regulation of adenylate cyclase activity	16/320	68/16672	1.39351e-13	1.18797e-11	8.40441e-12	ADCY3/ACR/ADCY5/ADORA2A/ADRA2A/ADCY8/ADRB2/ADORA2B/ADCY1/ADCY7/ADRB1/ADCY9/ADRB3/ADCY2/ADCYAP1/ADCY6	16
GO:0030808	regulation of nucleotide biosynthetic process	21/320	136/16672	1.5312e-13	1.27634e-11	9.02958e-12	ADCY3/ACR/APLP1/ADCY5/ADORA2A/ADRA2A/ADCY8/ADM/ABCA1/ADRB2/ADORA2B/ADCY1/ADCY7/ADRB1/ADCY9/ADRB3/ADCY2/ADCYAP1/ADCY6/ADCYAP1R1/APOE	21
GO:0031281	positive regulation of cyclase activity	15/320	59/16672	2.37473e-13	1.89524e-11	1.3408e-11	ADCY3/ACR/ADCY5/ADORA2A/ADCY8/ADRB2/ADORA2B/ADCY1/ADCY7/ADRB1/ADCY9/ADRB3/ADCY2/ADCYAP1/ADCY6	15
GO:0051349	positive regulation of lyase activity	15/320	59/16672	2.37473e-13	1.89524e-11	1.3408e-11	ADCY3/ACR/ADCY5/ADORA2A/ADCY8/ADRB2/ADORA2B/ADCY1/ADCY7/ADRB1/ADCY9/ADRB3/ADCY2/ADCYAP1/ADCY6	15
GO:0030814	regulation of cAMP metabolic process	20/320	125/16672	2.94955e-13	2.30495e-11	1.63066e-11	ADCY3/ACR/APLP1/ADCY5/ADORA2A/ADRA2A/ADCY8/ADM/ABCA1/ADRB2/ADORA2B/ADCY1/ADCY7/ADRB1/ADCY9/ADRB3/ADCY2/ADCYAP1/ADCY6/ADCYAP1R1	20
GO:0071880	adenylate cyclase-activating adrenergic receptor signaling pathway	10/320	19/16672	4.67763e-13	3.58077e-11	2.53326e-11	ADRA1B/ADRA2B/ADRA2A/ADRA1A/ADRB2/ADRA2C/ADRA1D/ADRB1/ADCY9/ADRB3	10
GO:0034440	lipid oxidation	18/320	99/16672	4.78723e-13	3.59138e-11	2.54076e-11	ACADS/ACADSB/ACAT1/ABCD1/AKT1/ACAT2/ABCD2/AKT2/APOD/ACADVL/ACAA1/ALOX12/ACADM/ADH7/ACOX1/ACADL/ACACB/ALDH3A2	18
GO:0033700	phospholipid efflux	9/320	14/16672	5.81821e-13	4.19694e-11	2.96917e-11	APOC1/APOC2/ABCA2/ABCA1/APOA4/APOA1/APOC3/APOA2/APOE	9
GO:0046033	AMP metabolic process	9/320	14/16672	5.81821e-13	4.19694e-11	2.96917e-11	APRT/AK4/AK1/ADSS/ADK/AK2/ADSL/AMPD3/AMPD2	9
GO:1901615	organic hydroxy compound metabolic process	34/320	409/16672	6.36511e-13	4.42146e-11	3.12801e-11	ALDH2/APOC1/ALDH1A3/AKR1B1/ACLY/AGTR2/ABAT/APOB/ABCA1/ADH1B/APOF/ALDH3B2/APP/ALDH3B1/APOA4/APOA1/ACADVL/APOA2/ADH5/ALOX12/ADH1A/ADH6/ALDH1A1/ADH7/ADH1C/ASIP/AOC2/ADH4/ACADL/ALOX15/ALDH1B1/ALDH3A2/ADCYAP1R1/APOE	34
GO:0050994	regulation of lipid catabolic process	14/320	52/16672	6.36521e-13	4.42146e-11	3.12801e-11	APOC1/APOC2/ADRA2A/ADRB2/AKT1/APOA4/ADORA1/ABCD2/APOA1/APOC3/AKT2/APOA2/ACACB/AADAC	14
GO:0007188	adenylate cyclase-modulating G-protein coupled receptor signaling pathway	22/320	164/16672	7.65027e-13	5.03458e-11	3.56176e-11	ADCY3/APLP1/ADRA1B/ADCY5/ADORA2A/ADRA2B/ADRA2A/ADCY8/ADRA1A/ADRB2/ADORA2B/ADORA1/ADCY1/ADCY7/ADRA2C/ADRA1D/ADRB1/ADCY9/ADRB3/ADCY2/ADCYAP1/ADCY6	22
GO:0003091	renal water homeostasis	12/320	34/16672	7.65052e-13	5.03458e-11	3.56176e-11	ADCY3/ADCY5/ADCY8/AQP1/ADCY1/AQP4/ADCY7/AQP2/ADCY9/AQP3/ADCY2/ADCY6	12
GO:0071827	plasma lipoprotein particle organization	12/320	34/16672	7.65052e-13	5.03458e-11	3.56176e-11	APOC1/ARF1/APOC2/AGTR1/APOB/ABCA1/APOA4/APOA1/APOC3/APOA2/AGT/APOE	12
GO:0009187	cyclic nucleotide metabolic process	23/320	183/16672	9.20975e-13	5.95617e-11	4.21375e-11	ADCY3/ACR/APLP1/ADCY5/ADORA2A/ADRA2A/ADCY8/ADM/ABCA1/ADRB2/AQP1/ADORA2B/ADCY1/ADCY7/ADRB1/ADCY9/ADRB3/ADCY2/ADCYAP1/ADCY6/ADCYAP1R1/AMPD2/APOE	23
GO:0006066	alcohol metabolic process	28/320	282/16672	1.09083e-12	6.89596e-11	4.87862e-11	ALDH2/APOC1/ALDH1A3/AKR1B1/ACLY/APOB/ABCA1/ADH1B/APOF/ALDH3B2/APP/ALDH3B1/APOA4/APOA1/ACADVL/APOA2/ADH5/ADH1A/ADH6/ALDH1A1/ADH7/ADH1C/ADH4/ACADL/ALDH1B1/ALDH3A2/ADCYAP1R1/APOE	28
GO:0030799	regulation of cyclic nucleotide metabolic process	21/320	150/16672	1.10306e-12	6.89596e-11	4.87862e-11	ADCY3/ACR/APLP1/ADCY5/ADORA2A/ADRA2A/ADCY8/ADM/ABCA1/ADRB2/ADORA2B/ADCY1/ADCY7/ADRB1/ADCY9/ADRB3/ADCY2/ADCYAP1/ADCY6/ADCYAP1R1/APOE	21
GO:0006884	cell volume homeostasis	11/320	28/16672	1.76251e-12	1.0838e-10	7.66747e-11	AQP6/AQP5/AQP8/AQP1/AQP7/AQP4/AQP2/AQP9/AQP3/ANXA7/ADD1	11
GO:0016042	lipid catabolic process	28/320	290/16672	2.16379e-12	1.30909e-10	9.26132e-11	STS/APOC1/ACADS/APOC2/ADRA2A/ACADSB/APOB/ADRB2/ACAT1/ABCD1/AKT1/APOA4/ADORA1/ACAT2/ABCD2/APOA1/APOC3/AKT2/ACADVL/ACAA1/APOA2/ACADM/ACOX1/ACADL/ACACB/AADAC/ALDH3A2/APOE	28
GO:0003014	renal system process	18/320	108/16672	2.26829e-12	1.35053e-10	9.55448e-11	ADCY3/ADCY5/ADCY8/AGTR1/AGTR2/ADRA1A/AQP1/ADORA1/ADCY1/AQP4/ADCY7/AQP2/AGT/ADCY9/AQP3/FAS/ADCY2/ADCY6	18
GO:0006869	lipid transport	29/320	313/16672	2.41871e-12	1.41759e-10	1.00289e-10	APOC1/APOC2/ANXA1/AGTR1/AGTR2/APOB/ABCA2/ABCA1/ABCA3/APOF/ABCD1/AKT1/ACACA/APOA4/ABCD2/APOA1/APOC3/AKT2/APOD/ABCA4/APOA2/ALB/AQP9/AGT/APOC4/ACACB/APOH/PLIN2/APOE	29
GO:0046058	cAMP metabolic process	20/320	141/16672	3.0107e-12	1.73741e-10	1.22915e-10	ADCY3/ACR/APLP1/ADCY5/ADORA2A/ADRA2A/ADCY8/ADM/ABCA1/ADRB2/ADORA2B/ADCY1/ADCY7/ADRB1/ADCY9/ADRB3/ADCY2/ADCYAP1/ADCY6/ADCYAP1R1	20
GO:0065005	protein-lipid complex assembly	10/320	22/16672	3.11114e-12	1.76816e-10	1.2509e-10	APOC1/ARF1/APOB/ABCA1/APOA4/APOA1/APOC3/APOA2/BIN1/APOE	10
GO:0050891	multicellular organismal water homeostasis	14/320	58/16672	3.29033e-12	1.8421e-10	1.30321e-10	ADCY3/ALOX12B/ADCY5/ADCY8/AQP1/ADCY1/AQP4/ADCY7/AQP2/ALOX12/ADCY9/AQP3/ADCY2/ADCY6	14
GO:0031279	regulation of cyclase activity	16/320	83/16672	3.78121e-12	2.08578e-10	1.47561e-10	ADCY3/ACR/ADCY5/ADORA2A/ADRA2A/ADCY8/ADRB2/ADORA2B/ADCY1/ADCY7/ADRB1/ADCY9/ADRB3/ADCY2/ADCYAP1/ADCY6	16
GO:0019395	fatty acid oxidation	17/320	97/16672	4.02406e-12	2.18757e-10	1.54762e-10	ACADS/ACADSB/ACAT1/ABCD1/AKT1/ACAT2/ABCD2/AKT2/ACADVL/ACAA1/ALOX12/ACADM/ADH7/ACOX1/ACADL/ACACB/ALDH3A2	17
GO:0051339	regulation of lyase activity	16/320	84/16672	4.59072e-12	2.45997e-10	1.74033e-10	ADCY3/ACR/ADCY5/ADORA2A/ADRA2A/ADCY8/ADRB2/ADORA2B/ADCY1/ADCY7/ADRB1/ADCY9/ADRB3/ADCY2/ADCYAP1/ADCY6	16
GO:1900542	regulation of purine nucleotide metabolic process	23/320	199/16672	5.41558e-12	2.8611e-10	2.02412e-10	ADCY3/ACR/ARNT/APLP1/ADCY5/ADORA2A/ADRA2A/ADCY8/ADM/ABCA1/ADRB2/ACTN3/ADORA2B/ADCY1/ADCY7/ADRB1/ADCY9/ADRB3/ADCY2/ADCYAP1/ADCY6/ADCYAP1R1/APOE	23
GO:0015791	polyol transport	9/320	17/16672	6.71513e-12	3.4984e-10	2.47498e-10	AQP6/AQP5/AQP8/AQP1/AQP7/AQP4/AQP2/AQP9/AQP3	9
GO:0060193	positive regulation of lipase activity	14/320	62/16672	8.80336e-12	4.50112e-10	3.18436e-10	ANG/ARL1/APOC2/AGTR1/ADRA1A/APOA4/APOA1/RHOA/AGT/ABL2/RHOC/ARF4/APOH/ADCYAP1R1	14
GO:0034367	macromolecular complex remodeling	10/320	24/16672	9.11983e-12	4.50112e-10	3.18436e-10	APOC1/APOC2/AGTR1/APOB/APOA4/APOA1/APOC3/APOA2/AGT/APOE	10
GO:0034368	protein-lipid complex remodeling	10/320	24/16672	9.11983e-12	4.50112e-10	3.18436e-10	APOC1/APOC2/AGTR1/APOB/APOA4/APOA1/APOC3/APOA2/AGT/APOE	10
GO:0034369	plasma lipoprotein particle remodeling	10/320	24/16672	9.11983e-12	4.50112e-10	3.18436e-10	APOC1/APOC2/AGTR1/APOB/APOA4/APOA1/APOC3/APOA2/AGT/APOE	10
GO:0006140	regulation of nucleotide metabolic process	23/320	206/16672	1.11329e-11	5.42334e-10	3.8368e-10	ADCY3/ACR/ARNT/APLP1/ADCY5/ADORA2A/ADRA2A/ADCY8/ADM/ABCA1/ADRB2/ACTN3/ADORA2B/ADCY1/ADCY7/ADRB1/ADCY9/ADRB3/ADCY2/ADCYAP1/ADCY6/ADCYAP1R1/APOE	23
GO:0006631	fatty acid metabolic process	30/320	357/16672	1.19781e-11	5.76024e-10	4.07515e-10	ALOX12B/APOC1/ACADS/APOC2/ANXA1/ACLY/ALOX5AP/ACADSB/ALOX5/ACAT1/ABCD1/AKT1/ACACA/APOA4/ACAT2/ABCD2/APOA1/APOC3/AKT2/ACADVL/ACAA1/ALOX12/ACADM/ADH7/ACOX1/ACADL/ACACB/ALOX15/ALOX15B/ALDH3A2	30
GO:0055088	lipid homeostasis	18/320	123/16672	2.20326e-11	1.04613e-09	7.40094e-10	ACADS/APOC2/ACADSB/APOB/ABCA2/ABCA1/ACACA/APOA4/APOA1/APOC3/ACADVL/APOA2/ACADM/APOC4/ASGR2/ACADL/AMPD2/APOE	18
GO:0071875	adrenergic receptor signaling pathway	10/320	26/16672	2.38722e-11	1.11931e-09	7.91865e-10	ADRA1B/ADRA2B/ADRA2A/ADRA1A/ADRB2/ADRA2C/ADRA1D/ADRB1/ADCY9/ADRB3	10
GO:0010876	lipid localization	29/320	347/16672	3.0659e-11	1.41978e-09	1.00444e-09	APOC1/APOC2/ANXA1/AGTR1/AGTR2/APOB/ABCA2/ABCA1/ABCA3/APOF/ABCD1/AKT1/ACACA/APOA4/ABCD2/APOA1/APOC3/AKT2/APOD/ABCA4/APOA2/ALB/AQP9/AGT/APOC4/ACACB/APOH/PLIN2/APOE	29
GO:0034377	plasma lipoprotein particle assembly	9/320	20/16672	4.4099e-11	2.00555e-09	1.41885e-09	APOC1/ARF1/APOB/ABCA1/APOA4/APOA1/APOC3/APOA2/APOE	9
GO:0030258	lipid modification	25/320	262/16672	4.43777e-11	2.00555e-09	1.41885e-09	APOC1/ACADS/AGTR1/ACADSB/ACAT1/ABCD1/AKT1/APOA4/ACAT2/ABCD2/APOA1/AKT2/APOD/ACADVL/ACAA1/APOA2/ALOX12/AGT/ACADM/ADH7/ACOX1/ACADL/ACACB/ALDH3A2/APOE	25
GO:0006635	fatty acid beta-oxidation	14/320	71/16672	6.23848e-11	2.78578e-09	1.97083e-09	ACADS/ACADSB/ACAT1/ABCD1/AKT1/ACAT2/ABCD2/AKT2/ACADVL/ACAA1/ACADM/ACOX1/ACADL/ACACB	14
GO:0008015	blood circulation	34/320	484/16672	6.74882e-11	2.97821e-09	2.10697e-09	ADRA1B/ABR/ADORA2A/ADRA2B/ADRA2A/AGTR1/AGTR2/ADRA1A/ABAT/ACTA2/ADM/ADRB2/ADA/AKT1/ADORA2B/ANGPT1/ADORA1/GRK2/ADRA2C/ANK2/ADRA1D/ADH5/ALOX12/ADRB1/AGT/ASIC2/AR/ADRB3/ADCYAP1/ADCY6/ACVRL1/ABL1/ACTC1/APOE	34
GO:0003013	circulatory system process	34/320	488/16672	8.41946e-11	3.67225e-09	2.59797e-09	ADRA1B/ABR/ADORA2A/ADRA2B/ADRA2A/AGTR1/AGTR2/ADRA1A/ABAT/ACTA2/ADM/ADRB2/ADA/AKT1/ADORA2B/ANGPT1/ADORA1/GRK2/ADRA2C/ANK2/ADRA1D/ADH5/ALOX12/ADRB1/AGT/ASIC2/AR/ADRB3/ADCYAP1/ADCY6/ACVRL1/ABL1/ACTC1/APOE	34
GO:0007266	Rho protein signal transduction	19/320	151/16672	9.04757e-11	3.90086e-09	2.7597e-09	ARHGDIG/ABR/ARHGDIA/ADRA2A/ARHGAP1/AGTR1/ADRA1A/ABCA1/RHOB/ARRB1/ARHGAP6/APOA1/APOC3/ARHGAP5/ARHGAP4/RHOA/ARHGDIB/RHOG/APOE	19
GO:0006833	water transport	9/320	22/16672	1.26256e-10	5.38166e-09	3.80731e-09	AQP6/AQP5/AQP8/AQP1/AQP7/AQP4/AQP2/AQP9/AQP3	9
GO:0009062	fatty acid catabolic process	15/320	89/16672	1.35193e-10	5.69784e-09	4.03099e-09	ACADS/ACADSB/ACAT1/ABCD1/AKT1/ACAT2/ABCD2/AKT2/ACADVL/ACAA1/ACADM/ACOX1/ACADL/ACACB/ALDH3A2	15
GO:0009991	response to extracellular stimulus	31/320	420/16672	1.45364e-10	6.05845e-09	4.28611e-09	ARG1/AOC1/ASGR1/APAF1/ALPL/ADM/ABCA1/ADRB2/ACAT1/ADA/AKT1/ADORA2B/ADSL/APOA1/AQP2/ASCL1/ALB/ADRB1/ACTA1/AQP3/ASNS/ADRB3/ALDH3A1/ADCYAP1/ARSB/ALAD/ACACB/AIF1/AHCY/APOE/AES	31
GO:0046395	carboxylic acid catabolic process	21/320	195/16672	1.77595e-10	7.32042e-09	5.17891e-09	ARG1/ACADS/ASL/AMT/ABAT/ACADSB/ACAT1/ABCD1/AKT1/ACAT2/ABCD2/AKT2/ACADVL/ACAA1/ACADM/ACOX1/ASPA/ACADL/ACACB/AGXT/ALDH3A2	21
GO:0072329	monocarboxylic acid catabolic process	16/320	106/16672	1.81081e-10	7.383e-09	5.22318e-09	ACADS/ACADSB/ACAT1/ABCD1/AKT1/ACAT2/ABCD2/AKT2/ACADVL/ACAA1/ACADM/ACOX1/ACADL/ACACB/AGXT/ALDH3A2	16
GO:0044283	small molecule biosynthetic process	33/320	480/16672	2.29818e-10	9.26933e-09	6.55768e-09	ALOX12B/ALDOC/APOC1/APOC2/ALDH1A3/ANXA1/ASL/AKR1B1/ACLY/ABAT/ALOX5AP/ADM/APOB/ALOX5/ACAT1/ACACA/ALDOB/APOA4/APOA1/APOC3/ALDOA/ACADVL/ALOX12/ASNS/ASPA/ACADL/ACACB/ALOX15/ALOX15B/AGXT/AHCY/ADCYAP1R1/APOE	33
GO:0010035	response to inorganic substance	32/320	455/16672	2.47294e-10	9.86809e-09	6.98128e-09	ARG1/AOC1/ANXA1/PARP1/AREG/AKR1B1/ABAT/ALOX5AP/APOB/AQP1/ADA/APP/RHOB/ANK3/APOA4/ADCY1/AQP2/ASCL1/ACO1/AQP9/ACTA1/AQP3/ANXA7/FAS/ANXA11/AANAT/APEX1/ALAD/APBB1/APOBEC1/ABL1/ALOX15	32
GO:0042311	vasodilation	13/320	65/16672	2.52263e-10	9.9604e-09	7.04659e-09	AGTR1/AGTR2/ADM/ADRB2/ADORA2B/ADORA1/ALOX12/ADRB1/AGT/ADRB3/ADCYAP1/ADCY6/APOE	13
GO:0010872	regulation of cholesterol esterification	7/320	11/16672	2.77795e-10	1.08543e-08	7.67896e-09	APOC1/AGTR1/APOA4/APOA1/APOA2/AGT/APOE	7
GO:0016054	organic acid catabolic process	22/320	221/16672	2.99056e-10	1.15645e-08	8.18144e-09	ARG1/ACADS/ASL/AMT/ABAT/ACADSB/ACAT1/ABCD1/AKT1/ACAT2/ABCD2/AKT2/ACADVL/ACAA1/ACADM/ACOX1/ASPA/ACADL/ACACB/AGXT/AHCY/ALDH3A2	22
GO:0034199	activation of protein kinase A activity	8/320	17/16672	3.53147e-10	1.35169e-08	9.56267e-09	ADCY3/ADCY5/ADCY8/ADCY1/ADCY7/ADCY9/ADCY2/ADCY6	8
GO:0019935	cyclic-nucleotide-mediated signaling	13/320	67/16672	3.76566e-10	1.42677e-08	1.00938e-08	ADCY3/ADCY5/ADCY8/ADM/ADCY1/ADCY7/ADRB1/ADCY9/ADCY2/ADCYAP1/ADCY6/ADCYAP1R1/APOE	13
GO:0016053	organic acid biosynthetic process	24/320	268/16672	4.07677e-10	1.5292e-08	1.08185e-08	ALOX12B/APOC1/APOC2/ALDH1A3/ANXA1/ASL/ACLY/ABAT/ALOX5AP/ALOX5/ACACA/APOA4/APOA1/APOC3/ACADVL/ALOX12/ASNS/ASPA/ACADL/ACACB/ALOX15/ALOX15B/AGXT/AHCY	24
GO:0044057	regulation of system process	33/320	492/16672	4.34396e-10	1.61329e-08	1.14134e-08	ACPP/ADRA1B/PARP1/ADRA2B/ADRA2A/AGTR1/AGTR2/ADRA1A/ABAT/ADM/ADRB2/AQP1/ADA/AKT1/ACTN3/ADORA2B/APOA4/ADORA1/GRK2/APOA1/ADRA2C/APOA2/ANK2/ADRA1D/ALOX12/ADRB1/AGT/ASIC2/ANXA6/ADCYAP1/ADCY6/AIF1/ABL1	33
GO:0019933	cAMP-mediated signaling	12/320	56/16672	5.33807e-10	1.94399e-08	1.3753e-08	ADCY3/ADCY5/ADCY8/ADM/ADCY1/ADCY7/ADRB1/ADCY9/ADCY2/ADCYAP1/ADCY6/ADCYAP1R1	12
GO:0097006	regulation of plasma lipoprotein particle levels	12/320	56/16672	5.33807e-10	1.94399e-08	1.3753e-08	APOC1/ARF1/APOC2/AGTR1/APOB/ABCA1/APOA4/APOA1/APOC3/APOA2/AGT/APOE	12
GO:0019216	regulation of lipid metabolic process	24/320	274/16672	6.40267e-10	2.30927e-08	1.63372e-08	APOC1/ARF1/APOC2/ANXA1/ADRA2A/AGTR1/APOB/ADRB2/AKT1/APOA4/ADORA1/ABCD2/APOA1/APOC3/AKT2/APOD/ACADVL/APOA2/AGT/SERPINA3/ACADL/ACACB/AADAC/APOE	24
GO:0001973	adenosine receptor signaling pathway	7/320	12/16672	6.55761e-10	2.34263e-08	1.65732e-08	ACPP/ADCY5/ADORA2A/ADA/ADORA2B/ADORA1/ADORA3	7
GO:0046394	carboxylic acid biosynthetic process	23/320	253/16672	7.11212e-10	2.51675e-08	1.7805e-08	ALOX12B/APOC1/APOC2/ALDH1A3/ANXA1/ASL/ACLY/ABAT/ALOX5AP/ALOX5/ACACA/APOA4/APOA1/APOC3/ACADVL/ALOX12/ASNS/ASPA/ACADL/ACACB/ALOX15/ALOX15B/AGXT	23
GO:0031960	response to corticosteroid	18/320	152/16672	7.80737e-10	2.73696e-08	1.93629e-08	ARG1/ANXA1/PARP1/AREG/ALPL/AGTR2/ADM/ABCA3/AQP1/ANXA3/APOA2/FAS/AANAT/ALDH3A1/ADCYAP1/ALAD/AIF1/AGXT	18
GO:0019229	regulation of vasoconstriction	12/320	58/16672	8.23762e-10	2.86105e-08	2.02408e-08	ADRA1B/ADRA2B/ADRA2A/AGTR1/ADRA1A/ADM/AKT1/ADRA2C/ADRA1D/AGT/ASIC2/ABL1	12
GO:0051384	response to glucocorticoid	17/320	137/16672	1.12189e-09	3.86075e-08	2.73133e-08	ARG1/ANXA1/AREG/ALPL/AGTR2/ADM/ABCA3/AQP1/ANXA3/APOA2/FAS/AANAT/ALDH3A1/ADCYAP1/ALAD/AIF1/AGXT	17
GO:0042310	vasoconstriction	13/320	74/16672	1.3769e-09	4.69523e-08	3.32169e-08	ADRA1B/ADRA2B/ADRA2A/AGTR1/ADRA1A/ACTA2/ADM/AKT1/ADRA2C/ADRA1D/AGT/ASIC2/ABL1	13
GO:0006633	fatty acid biosynthetic process	17/320	139/16672	1.40816e-09	4.75858e-08	3.36651e-08	ALOX12B/APOC1/APOC2/ANXA1/ACLY/ALOX5AP/ALOX5/ACACA/APOA4/APOA1/APOC3/ACADVL/ALOX12/ACADL/ACACB/ALOX15/ALOX15B	17
GO:0006898	receptor-mediated endocytosis	24/320	286/16672	1.52161e-09	5.09604e-08	3.60525e-08	APOC1/ANXA2/AMBP/ARF1/ASGR1/APOC2/ARRB2/ADM/APOB/ADRB2/ANGPT1/ARRB1/AP2A2/GRK2/ACHE/APOA1/APOC3/ALB/ARF6/AP2A1/GRK3/ASGR2/AP2B1/APOE	24
GO:0072330	monocarboxylic acid biosynthetic process	19/320	180/16672	1.87722e-09	6.23137e-08	4.40845e-08	ALOX12B/APOC1/APOC2/ALDH1A3/ANXA1/ACLY/ALOX5AP/ALOX5/ACACA/APOA4/APOA1/APOC3/ACADVL/ALOX12/ACADL/ACACB/ALOX15/ALOX15B/AGXT	19
GO:0042044	fluid transport	9/320	29/16672	2.2583e-09	7.41201e-08	5.2437e-08	AQP6/AQP5/AQP8/AQP1/AQP7/AQP4/AQP2/AQP9/AQP3	9
GO:0032368	regulation of lipid transport	14/320	92/16672	2.27241e-09	7.41201e-08	5.2437e-08	APOC1/APOC2/AGTR1/AGTR2/ABCA2/ABCA1/AKT1/APOA4/APOA1/APOC3/AKT2/APOA2/AGT/APOE	14
GO:0007588	excretion	12/320	64/16672	2.73675e-09	8.66546e-08	6.13047e-08	AQP6/AQP5/AGTR1/AGTR2/ADRA1A/AQP7/ADORA2B/ADORA1/AQP2/AQP9/AGT/AQP3	12
GO:0034433	steroid esterification	7/320	14/16672	2.74911e-09	8.66546e-08	6.13047e-08	APOC1/AGTR1/APOA4/APOA1/APOA2/AGT/APOE	7
GO:0034434	sterol esterification	7/320	14/16672	2.74911e-09	8.66546e-08	6.13047e-08	APOC1/AGTR1/APOA4/APOA1/APOA2/AGT/APOE	7
GO:0034435	cholesterol esterification	7/320	14/16672	2.74911e-09	8.66546e-08	6.13047e-08	APOC1/AGTR1/APOA4/APOA1/APOA2/AGT/APOE	7
GO:0033344	cholesterol efflux	10/320	41/16672	3.90313e-09	1.22005e-07	8.63139e-08	APOC1/APOC2/APOB/ABCA2/ABCA1/APOA4/APOA1/APOC3/APOA2/APOE	10
GO:0016101	diterpenoid metabolic process	14/320	96/16672	4.02813e-09	1.24872e-07	8.8342e-08	APOC2/ALDH1A3/APOB/APOA4/APOA1/APOC3/ABCA4/APOA2/ADH5/ALDH1A1/ADH7/ADH4/ALDH3A2/APOE	14
GO:0009127	purine nucleoside monophosphate biosynthetic process	12/320	67/16672	4.7465e-09	1.44749e-07	1.02404e-07	APRT/AK4/AK1/AMPD1/ADSS/ADK/AK2/ADA/ADSL/ALDOA/AMPD3/AMPD2	12
GO:0009168	purine ribonucleoside monophosphate biosynthetic process	12/320	67/16672	4.7465e-09	1.44749e-07	1.02404e-07	APRT/AK4/AK1/AMPD1/ADSS/ADK/AK2/ADA/ADSL/ALDOA/AMPD3/AMPD2	12
GO:0071417	cellular response to organonitrogen compound	30/320	462/16672	5.99642e-09	1.81392e-07	1.28327e-07	ADCY3/ARG1/APLP1/ADCY5/AOC1/APRT/PARP1/ADCY8/AKR1B1/AGTR1/AGTR2/AQP8/AQP1/AKT1/APP/ADCY1/ADCY7/ACTN2/AKT2/AQP9/AGT/ADCY9/ADCY2/AANAT/APEX1/APOBEC1/ADCY6/AIF1/ABL1/AHSG	30
GO:1903524	positive regulation of blood circulation	13/320	84/16672	6.93132e-09	2.07995e-07	1.47148e-07	ADRA1B/AGTR2/ADRA1A/ADM/ADA/AKT1/ADRA2C/ADRA1D/ALOX12/ADRB1/AGT/ADCYAP1/ABL1	13
GO:0006940	regulation of smooth muscle contraction	11/320	56/16672	7.56935e-09	2.25338e-07	1.59418e-07	ADRA1B/ADRA2B/ADRA2A/ADRA1A/ABAT/ADRB2/ADA/ADORA2B/ADORA1/ADRA2C/ADRA1D	11
GO:0010517	regulation of phospholipase activity	11/320	59/16672	1.35161e-08	3.99204e-07	2.82421e-07	ANG/ARL1/APOC2/ANXA1/AGTR1/ADRA1A/AGT/ABL2/ARF4/ABL1/ADCYAP1R1	11
GO:0042493	response to drug	27/320	397/16672	1.36325e-08	3.99496e-07	2.82628e-07	ARG1/AOC1/PARP4/ANXA1/AK4/ADRA1A/ABAT/ABCA2/ABCA1/ABCA3/AQP1/ADA/ABCC6/ADCY1/APOA1/APOD/APOA2/AMH/ALDH3A1/APEX1/ALAD/APOBEC1/ACACB/ABL1/PLIN2/ADCYAP1R1/ACTC1	27
GO:0001523	retinoid metabolic process	13/320	89/16672	1.42888e-08	4.15484e-07	2.93938e-07	APOC2/ALDH1A3/APOB/APOA4/APOA1/APOC3/ABCA4/APOA2/ADH5/ALDH1A1/ADH7/ADH4/APOE	13
GO:0043691	reverse cholesterol transport	7/320	17/16672	1.4824e-08	4.27731e-07	3.02603e-07	APOC2/ABCA1/APOA4/APOA1/APOC3/APOA2/APOE	7
GO:0006721	terpenoid metabolic process	14/320	106/16672	1.49752e-08	4.28794e-07	3.03355e-07	APOC2/ALDH1A3/APOB/APOA4/APOA1/APOC3/ABCA4/APOA2/ADH5/ALDH1A1/ADH7/ADH4/ALDH3A2/APOE	14
GO:0010038	response to metal ion	23/320	297/16672	1.55053e-08	4.40609e-07	3.11714e-07	ARG1/AOC1/PARP1/ABAT/ALOX5AP/AQP1/APP/ANK3/ADCY1/AQP2/ASCL1/ACO1/AQP9/ACTA1/AQP3/ANXA7/FAS/ANXA11/AANAT/ALAD/APBB1/APOBEC1/ALOX15	23
GO:0045833	negative regulation of lipid metabolic process	12/320	75/16672	1.80249e-08	5.08356e-07	3.59642e-07	APOC1/APOC2/ADRA2A/AKT1/ADORA1/APOC3/APOD/ACADVL/APOA2/ACADL/ACACB/APOE	12
GO:0050996	positive regulation of lipid catabolic process	8/320	26/16672	1.95195e-08	5.46402e-07	3.86557e-07	APOC2/ADRB2/APOA4/ABCD2/APOA1/AKT2/APOA2/AADAC	8
GO:0034370	triglyceride-rich lipoprotein particle remodeling	6/320	11/16672	2.03328e-08	5.60798e-07	3.96742e-07	APOC2/APOA4/APOA1/APOC3/APOA2/APOE	6
GO:0034372	very-low-density lipoprotein particle remodeling	6/320	11/16672	2.03328e-08	5.60798e-07	3.96742e-07	APOC2/APOA4/APOA1/APOC3/APOA2/APOE	6
GO:0010817	regulation of hormone levels	29/320	460/16672	2.09335e-08	5.7315e-07	4.05481e-07	SLC25A6/SLC25A5/ARNT/ADCY5/ASMT/ALDH1A3/ANXA1/ADRA2B/ADRA2A/AKR1B1/AGTR1/AGTR2/ABAT/ADM/ADORA1/ARRB1/ADRA2C/SLC25A4/ARL2/AGT/ACVR2B/ALDH9A1/ALDH1A1/ADH7/AANAT/ADCYAP1/ADH4/AFP/ARNTL	29
GO:0090257	regulation of muscle system process	18/320	190/16672	2.78514e-08	7.57034e-07	5.35571e-07	ADRA1B/PARP1/ADRA2B/ADRA2A/ADRA1A/ABAT/ADRB2/ADA/ACTN3/ADORA2B/ADORA1/GRK2/ADRA2C/ANK2/ADRA1D/AGT/ANXA6/AIF1	18
GO:0006939	smooth muscle contraction	13/320	94/16672	2.80889e-08	7.57996e-07	5.36252e-07	ADRA1B/ADRA2B/ADRA2A/ADRA1A/ABAT/ACTA2/ADRB2/ADA/ADORA2B/ADORA1/ADRA2C/ADRA1D/AGT	13
GO:0019217	regulation of fatty acid metabolic process	12/320	78/16672	2.84635e-08	7.62619e-07	5.39523e-07	APOC1/APOC2/ANXA1/AKT1/APOA4/ABCD2/APOA1/APOC3/AKT2/ACADVL/ACADL/ACACB	12
GO:0003012	muscle system process	26/320	385/16672	2.94988e-08	7.84752e-07	5.55181e-07	ADRA1B/PARP1/ADRA2B/ADRA2A/AGTR2/ADRA1A/ABAT/ACTA2/ADRB2/ADA/ACTN3/ADORA2B/ADORA1/ACTG2/GRK2/ACTN2/ADRA2C/ALDOA/ANK2/ADRA1D/AGT/ACTA1/ANXA6/ARG2/AIF1/ACTC1	26
GO:0032371	regulation of sterol transport	9/320	38/16672	3.15743e-08	8.28218e-07	5.85931e-07	APOC1/APOC2/ABCA2/ABCA1/APOA4/APOA1/APOC3/APOA2/APOE	9
GO:0032374	regulation of cholesterol transport	9/320	38/16672	3.15743e-08	8.28218e-07	5.85931e-07	APOC1/APOC2/ABCA2/ABCA1/APOA4/APOA1/APOC3/APOA2/APOE	9
GO:0009156	ribonucleoside monophosphate biosynthetic process	12/320	80/16672	3.81529e-08	9.93831e-07	7.03096e-07	APRT/AK4/AK1/AMPD1/ADSS/ADK/AK2/ADA/ADSL/ALDOA/AMPD3/AMPD2	12
GO:0071377	cellular response to glucagon stimulus	9/320	39/16672	4.03596e-08	1.04406e-06	7.38631e-07	ADCY3/ARG1/ADCY5/ADCY8/ADCY1/ADCY7/ADCY9/ADCY2/ADCY6	9
GO:1903522	regulation of blood circulation	22/320	288/16672	4.10479e-08	1.05459e-06	7.46083e-07	ADRA1B/ADRA2B/ADRA2A/AGTR1/AGTR2/ADRA1A/ADM/ADRB2/ADA/AKT1/ADORA1/GRK2/ADRA2C/ANK2/ADRA1D/ALOX12/ADRB1/AGT/ASIC2/ADCYAP1/ADCY6/ABL1	22
GO:0048545	response to steroid hormone	25/320	369/16672	5.16338e-08	1.31754e-06	9.32107e-07	ACR/ARG1/ANXA1/PARP1/AREG/ARRB2/ALPL/AGTR2/ADM/ABCA2/ABCA3/AQP1/NR0B1/ANXA3/APOA2/ACTA1/AR/FAS/AANAT/ALDH3A1/ADCYAP1/ALAD/AIF1/AGXT/ARNTL	25
GO:0032147	activation of protein kinase activity	22/320	292/16672	5.2477e-08	1.33001e-06	9.40928e-07	ADCY3/ANG/ADCY5/ADRA2B/ADRA2A/ADCY8/ADAM8/ADRB2/ADORA2B/ANGPT1/ADORA1/ARRB1/ADCY1/ADCY7/ADRA2C/AGT/ADCY9/ACVR2B/ALK/ADCY2/ADCY6/ABL1	22
GO:1901655	cellular response to ketone	11/320	67/16672	5.41341e-08	1.3628e-06	9.64125e-07	ADCY3/ARG1/ADCY5/AKR1B1/AGTR2/AQP1/AKT1/ACACA/ADCY1/ADCY2/ADCY6	11
GO:1901652	response to peptide	27/320	425/16672	5.61853e-08	1.40501e-06	9.93987e-07	ADCY3/ARG1/ADCY5/APRT/ANXA1/PARP1/AREG/ADCY8/AKR1B1/AGTR1/AGTR2/ADM/AKT1/ADCY1/ADCY7/ACTN2/AKT2/JAG1/AGT/ADCY9/AGRP/ADCY2/AANAT/APEX1/APOBEC1/ADCY6/AHSG	27
GO:0006936	muscle contraction	23/320	319/16672	5.8265e-08	1.44736e-06	1.02395e-06	ADRA1B/ADRA2B/ADRA2A/ADRA1A/ABAT/ACTA2/ADRB2/ADA/ACTN3/ADORA2B/ADORA1/ACTG2/GRK2/ACTN2/ADRA2C/ALDOA/ANK2/ADRA1D/AGT/ACTA1/ANXA6/ARG2/ACTC1	23
GO:0003073	regulation of systemic arterial blood pressure	12/320	84/16672	6.68134e-08	1.6488e-06	1.16646e-06	ADRA1B/AGTR1/AGTR2/ADRA1A/ADRB2/ADORA1/ADRA1D/ADRB1/AGT/ASIC2/AR/ADRB3	12
GO:0019372	lipoxygenase pathway	6/320	13/16672	7.31063e-08	1.78066e-06	1.25975e-06	ALOX12B/ALOX5AP/ALOX5/ALOX12/ALOX15/ALOX15B	6
GO:0043173	nucleotide salvage	6/320	13/16672	7.31063e-08	1.78066e-06	1.25975e-06	APRT/AMPD1/ADK/ADA/AMPD3/AMPD2	6
GO:0070482	response to oxygen levels	22/320	301/16672	8.97446e-08	2.17182e-06	1.53648e-06	ACTN4/ANG/ARNT/APAF1/ANGPT2/BIRC2/ABAT/ADM/ADAM8/AQP1/ADA/AKT1/ADORA1/ADSL/ASCL2/ALAS2/FAS/ALDH3A1/ALAD/ACVRL1/AGER/AHCY	22
GO:0045834	positive regulation of lipid metabolic process	14/320	122/16672	9.19368e-08	2.21061e-06	1.56392e-06	APOC1/APOC2/ANXA1/AGTR1/ADRB2/AKT1/APOA4/ABCD2/APOA1/AKT2/APOA2/AGT/AADAC/APOE	14
GO:0001666	response to hypoxia	21/320	277/16672	9.56121e-08	2.28434e-06	1.61608e-06	ACTN4/ANG/ARNT/APAF1/ANGPT2/BIRC2/ABAT/ADM/ADAM8/AQP1/ADA/AKT1/ADORA1/ADSL/ASCL2/ALAS2/ALDH3A1/ALAD/ACVRL1/AGER/AHCY	21
GO:0007193	adenylate cyclase-inhibiting G-protein coupled receptor signaling pathway	11/320	71/16672	1.00744e-07	2.39172e-06	1.69205e-06	ADCY3/APLP1/ADCY5/ADRA2A/ADCY8/ADORA1/ADCY1/ADCY7/ADCY9/ADCY2/ADCY6	11
GO:0006937	regulation of muscle contraction	15/320	143/16672	1.06499e-07	2.51244e-06	1.77745e-06	ADRA1B/ADRA2B/ADRA2A/ADRA1A/ABAT/ADRB2/ADA/ACTN3/ADORA2B/ADORA1/GRK2/ADRA2C/ANK2/ADRA1D/ANXA6	15
GO:0090130	tissue migration	19/320	231/16672	1.1092e-07	2.60039e-06	1.83967e-06	ANGPT2/AGTR2/ACTA2/AKT1/RHOB/ANGPT1/ACTG2/APOA1/ANXA3/RHOA/ALOX12/AGT/ACTA1/AAMP/ARSB/ACVRL1/APOH/ACTC1/APOE	19
GO:1990267	response to transition metal nanoparticle	14/320	124/16672	1.12987e-07	2.62549e-06	1.85743e-06	ARG1/AOC1/PARP1/ABAT/AQP1/AQP2/ANK2/ACO1/AQP9/AANAT/ARSB/ALAD/APBB1/APOBEC1	14
GO:0009124	nucleoside monophosphate biosynthetic process	12/320	88/16672	1.13391e-07	2.62549e-06	1.85743e-06	APRT/AK4/AK1/AMPD1/ADSS/ADK/AK2/ADA/ADSL/ALDOA/AMPD3/AMPD2	12
GO:0050995	negative regulation of lipid catabolic process	7/320	22/16672	1.19685e-07	2.75414e-06	1.94844e-06	APOC1/ADRA2A/AKT1/ADORA1/APOC3/APOA2/ACACB	7
GO:0008217	regulation of blood pressure	16/320	165/16672	1.20416e-07	2.75414e-06	1.94844e-06	ADRA1B/AGTR1/AGTR2/ADRA1A/ABAT/ACTA2/ADRB2/ADORA1/ADRA1D/ADH5/ADRB1/AGT/ASIC2/AR/ADRB3/ACVRL1	16
GO:0042312	regulation of vasodilation	9/320	44/16672	1.24094e-07	2.82108e-06	1.9958e-06	AGTR1/AGTR2/ADM/ADRB2/ADORA1/ALOX12/AGT/ADCYAP1/ADCY6	9
GO:0007173	epidermal growth factor receptor signaling pathway	14/320	125/16672	1.25064e-07	2.82599e-06	1.99927e-06	AREG/ADRA2B/ADRA2A/AKT1/APP/ADORA1/AP2A2/ADRA2C/AGT/FASLG/AP2A1/ARF4/ABL1/AP2B1	14
GO:0002576	platelet degranulation	13/320	107/16672	1.35079e-07	3.03402e-06	2.14645e-06	ACTN4/A2M/ACTN1/APP/APOA1/ACTN2/ALDOA/ALB/APLP2/SERPINA3/A1BG/APOH/AHSG	13
GO:0019932	second-messenger-mediated signaling	19/320	234/16672	1.35911e-07	3.03453e-06	2.14681e-06	ADCY3/ADCY5/ADCY8/AGTR1/AGTR2/ADM/ADA/ACTN3/ADCY1/ADCY7/ANK2/ADRB1/AGT/ADCY9/ADCY2/ADCYAP1/ADCY6/ADCYAP1R1/APOE	19
GO:0051056	regulation of small GTPase mediated signal transduction	21/320	283/16672	1.37434e-07	3.05039e-06	2.15803e-06	ARHGDIG/ABR/RHOH/ARHGDIA/ARHGAP1/A2M/ADRA1A/ABCA1/RHOB/ARRB1/ARHGAP6/APOA1/APOC3/ARHGAP5/ARHGAP4/RHOA/ARF6/RHOC/ARHGDIB/RHOG/APOE	21
GO:0031667	response to nutrient levels	25/320	390/16672	1.49847e-07	3.287e-06	2.32542e-06	ARG1/AOC1/APAF1/ALPL/ADM/ABCA1/ADRB2/ACAT1/ADA/AKT1/ADSL/APOA1/ASCL1/ALB/ADRB1/AQP3/ASNS/ADRB3/ALDH3A1/ADCYAP1/ARSB/ALAD/ACACB/AHCY/APOE	25
GO:0043434	response to peptide hormone	25/320	390/16672	1.49847e-07	3.287e-06	2.32542e-06	ADCY3/ARG1/ADCY5/APRT/ANXA1/PARP1/AREG/ADCY8/AGTR1/AGTR2/ADM/AKT1/ADCY1/ADCY7/ACTN2/AKT2/AGT/ADCY9/AGRP/ADCY2/AANAT/APEX1/APOBEC1/ADCY6/AHSG	25
GO:0036293	response to decreased oxygen levels	21/320	285/16672	1.54751e-07	3.37483e-06	2.38756e-06	ACTN4/ANG/ARNT/APAF1/ANGPT2/BIRC2/ABAT/ADM/ADAM8/AQP1/ADA/AKT1/ADORA1/ADSL/ASCL2/ALAS2/ALDH3A1/ALAD/ACVRL1/AGER/AHCY	21
GO:0006720	isoprenoid metabolic process	14/320	128/16672	1.68602e-07	3.6273e-06	2.56617e-06	APOC2/ALDH1A3/APOB/APOA4/APOA1/APOC3/ABCA4/APOA2/ADH5/ALDH1A1/ADH7/ADH4/ALDH3A2/APOE	14
GO:0035588	G-protein coupled purinergic receptor signaling pathway	7/320	23/16672	1.69229e-07	3.6273e-06	2.56617e-06	ACPP/ADCY5/ADORA2A/ADA/ADORA2B/ADORA1/ADORA3	7
GO:0045940	positive regulation of steroid metabolic process	7/320	23/16672	1.69229e-07	3.6273e-06	2.56617e-06	APOC1/AGTR1/APOA4/APOA1/APOA2/AGT/APOE	7
GO:0051346	negative regulation of hydrolase activity	25/320	394/16672	1.8191e-07	3.87695e-06	2.74279e-06	APOC1/BIRC3/AMBP/APCS/ANXA1/RHOH/ARRB2/A2M/BIRC2/XIAP/AQP1/AKT1/APP/BIRC5/ARRB1/APOA1/APOC3/APOA2/ARL2/APLP2/AGT/SERPINA3/ADCYAP1/ABL1/AHSG	25
GO:0003044	regulation of systemic arterial blood pressure mediated by a chemical signal	9/320	46/16672	1.86454e-07	3.95134e-06	2.79542e-06	ADRA1B/AGTR1/AGTR2/ADRA1A/ADRB2/ADRA1D/ADRB1/AGT/ADRB3	9
GO:0042304	regulation of fatty acid biosynthetic process	8/320	34/16672	1.98443e-07	4.1818e-06	2.95846e-06	APOC1/APOC2/ANXA1/APOA4/APOA1/APOC3/ACADVL/ACADL	8
GO:0034375	high-density lipoprotein particle remodeling	6/320	15/16672	2.0641e-07	4.25409e-06	3.0096e-06	APOC1/APOA4/APOA1/APOC3/APOA2/APOE	6
GO:0043101	purine-containing compound salvage	6/320	15/16672	2.0641e-07	4.25409e-06	3.0096e-06	APRT/AMPD1/ADK/ADA/AMPD3/AMPD2	6
GO:0051004	regulation of lipoprotein lipase activity	6/320	15/16672	2.0641e-07	4.25409e-06	3.0096e-06	APOC1/APOC2/APOA4/APOA1/APOC3/APOH	6
GO:0060192	negative regulation of lipase activity	6/320	15/16672	2.0641e-07	4.25409e-06	3.0096e-06	APOC1/ANXA1/APOA1/APOC3/APOA2/ABL1	6
GO:0015914	phospholipid transport	10/320	61/16672	2.23502e-07	4.58117e-06	3.241e-06	APOC1/APOC2/ABCA2/ABCA1/APOA4/APOA1/APOC3/ABCA4/APOA2/APOE	10
GO:0032369	negative regulation of lipid transport	7/320	24/16672	2.34999e-07	4.79066e-06	3.3892e-06	APOC1/APOC2/AGTR2/AKT1/APOC3/AKT2/APOA2	7
GO:0010594	regulation of endothelial cell migration	13/320	113/16672	2.58248e-07	5.23616e-06	3.70438e-06	ANGPT2/AGTR2/AKT1/RHOB/ANGPT1/ANXA3/RHOA/ALOX12/AGT/AAMP/ACVRL1/APOH/APOE	13
GO:0051051	negative regulation of transport	26/320	430/16672	2.6264e-07	5.29657e-06	3.74711e-06	SLC25A5/APOC1/ANXA2/APOC2/ANXA1/ABR/ADRA2B/ADRA2A/AGTR2/ABAT/ADA/AKT1/ANXA4/ANK3/ANGPT1/ADORA1/APOA1/APOC3/ACTN2/AKT2/APOD/ADRA2C/APOA2/ARF6/ASIC1/ADCYAP1	26
GO:0033762	response to glucagon	9/320	48/16672	2.74422e-07	5.50457e-06	3.89427e-06	ADCY3/ARG1/ADCY5/ADCY8/ADCY1/ADCY7/ADCY9/ADCY2/ADCY6	9
GO:0009306	protein secretion	27/320	460/16672	2.77117e-07	5.52908e-06	3.91161e-06	ANG/SLC25A6/SLC25A5/ADCY5/ARF1/ANXA1/ADRA2A/AGTR2/ABAT/ABCA1/ADAM8/ANXA4/ANGPT1/ARRB1/ACHE/APOA1/ADRA2C/SLC25A4/APOA2/ARL2/AGT/ACVR2B/ARL4D/APBB1/ABL1/ALOX15B/ARNTL	27
GO:0010518	positive regulation of phospholipase activity	9/320	49/16672	3.30548e-07	6.56023e-06	4.64111e-06	ANG/ARL1/APOC2/AGTR1/ADRA1A/AGT/ABL2/ARF4/ADCYAP1R1	9
GO:0008202	steroid metabolic process	20/320	273/16672	3.37268e-07	6.65839e-06	4.71055e-06	STS/APOC1/AKR1B1/ACLY/AGTR1/ADM/APOB/ABCA1/APOF/APP/NR0B1/APOA4/APOA1/ACADVL/ACAA1/APOA2/AGT/ACADL/AFP/APOE	20
GO:0051271	negative regulation of cellular component movement	19/320	249/16672	3.57418e-07	7.01923e-06	4.96583e-06	ACTN4/ANGPT2/ABR/AGTR2/ACTN1/ADA/RHOB/ADORA1/APOD/ARHGAP4/RHOA/ARHGDIB/APEX1/ADARB1/ACVRL1/AIF1/APOH/ALOX15B/APOE	19
GO:0071407	cellular response to organic cyclic compound	28/320	498/16672	3.9634e-07	7.74308e-06	5.47792e-06	ADCY3/ARG1/APLP1/ADCY5/AOC1/ANXA1/PARP1/ARRB2/ALPL/AGTR2/AQP8/ABCA1/AQP1/AKT1/APP/ADAR/NR0B1/ADCY1/AQP9/AR/ADCY2/AANAT/APEX1/ADCYAP1/ADCY6/AIF1/ABL1/ARNTL	28
GO:0015748	organophosphate ester transport	11/320	81/16672	4.02197e-07	7.8168e-06	5.53007e-06	SLC25A6/APOC1/APOC2/ABCA2/ABCA1/APOA4/APOA1/APOC3/ABCA4/APOA2/APOE	11
GO:1901653	cellular response to peptide	21/320	304/16672	4.52988e-07	8.75855e-06	6.19633e-06	ADCY3/ARG1/ADCY5/APRT/PARP1/ADCY8/AKR1B1/AGTR1/AGTR2/AKT1/ADCY1/ADCY7/ACTN2/AKT2/AGT/ADCY9/ADCY2/APEX1/APOBEC1/ADCY6/AHSG	21
GO:0042058	regulation of epidermal growth factor receptor signaling pathway	11/320	82/16672	4.56655e-07	8.78417e-06	6.21445e-06	ADRA2B/ADRA2A/AKT1/APP/ADORA1/AP2A2/ADRA2C/AGT/FASLG/AP2A1/AP2B1	11
GO:0007265	Ras protein signal transduction	21/320	307/16672	5.32253e-07	1.01861e-05	7.20628e-06	ARHGDIG/ABR/ARHGDIA/ADRA2A/ARHGAP1/AGTR1/ADRA1A/ABCA1/RHOB/ARRB1/ARHGAP6/APOA1/APOC3/ARHGAP5/ARHGAP4/RHOA/ARF6/ARHGDIB/RHOG/AIF1/APOE	21
GO:0030336	negative regulation of cell migration	17/320	208/16672	5.71044e-07	1.0873e-05	7.69223e-06	ANGPT2/ABR/AGTR2/ADA/RHOB/ADORA1/APOD/ARHGAP4/RHOA/ARHGDIB/APEX1/ADARB1/ACVRL1/AIF1/APOH/ALOX15B/APOE	17
GO:0034380	high-density lipoprotein particle assembly	5/320	10/16672	5.88021e-07	1.11397e-05	7.88092e-06	ABCA1/APOA4/APOA1/APOA2/APOE	5
GO:0046461	neutral lipid catabolic process	8/320	39/16672	6.1856e-07	1.16011e-05	8.20731e-06	APOC2/APOB/APOA4/APOA1/APOC3/APOA2/AADAC/APOE	8
GO:0046464	acylglycerol catabolic process	8/320	39/16672	6.1856e-07	1.16011e-05	8.20731e-06	APOC2/APOB/APOA4/APOA1/APOC3/APOA2/AADAC/APOE	8
GO:1901184	regulation of ERBB signaling pathway	11/320	85/16672	6.61092e-07	1.23371e-05	8.72801e-06	ADRA2B/ADRA2A/AKT1/APP/ADORA1/AP2A2/ADRA2C/AGT/FASLG/AP2A1/AP2B1	11
GO:0008361	regulation of cell size	15/320	165/16672	6.91934e-07	1.28487e-05	9.08998e-06	AQP6/AQP5/AQP8/AQP1/AKT1/AQP7/AQP4/AQP2/ARHGAP4/AQP9/AQP3/ANXA7/ADD1/ABL1/APOE	15
GO:0042632	cholesterol homeostasis	10/320	69/16672	7.358e-07	1.35294e-05	9.57148e-06	APOC2/APOB/ABCA2/ABCA1/APOA4/APOA1/APOC3/APOA2/AMPD2/APOE	10
GO:0055092	sterol homeostasis	10/320	69/16672	7.358e-07	1.35294e-05	9.57148e-06	APOC2/APOB/ABCA2/ABCA1/APOA4/APOA1/APOC3/APOA2/AMPD2/APOE	10
GO:0071375	cellular response to peptide hormone stimulus	20/320	287/16672	7.45414e-07	1.36393e-05	9.64923e-06	ADCY3/ARG1/ADCY5/APRT/PARP1/ADCY8/AGTR1/AGTR2/AKT1/ADCY1/ADCY7/ACTN2/AKT2/AGT/ADCY9/ADCY2/APEX1/APOBEC1/ADCY6/AHSG	20
GO:0030100	regulation of endocytosis	16/320	190/16672	8.26968e-07	1.5058e-05	1.0653e-05	ACTN4/APOC1/ANXA2/ARF1/APOC2/ABR/ARRB2/ANGPT1/ARRB1/APOC3/ARF6/ABL2/ABL1/ALOX15/AHSG/BIN1	16
GO:0038127	ERBB signaling pathway	14/320	146/16672	8.57051e-07	1.55304e-05	1.09872e-05	AREG/ADRA2B/ADRA2A/AKT1/APP/ADORA1/AP2A2/ADRA2C/AGT/FASLG/AP2A1/ARF4/ABL1/AP2B1	14
GO:0045860	positive regulation of protein kinase activity	26/320	458/16672	8.74355e-07	1.57678e-05	1.11551e-05	ADCY3/ANG/ADCY5/ADRA2B/ADRA2A/ADCY8/ADAM8/ADRB2/AKT1/ADORA2B/ANGPT1/ADORA1/ARRB1/ADCY1/ADCY7/ADRA2C/RHOA/AGT/ADCY9/ACVR2B/ALK/ADCY2/ADCYAP1/ADCY6/ABL1/AGER	26
GO:0033539	fatty acid beta-oxidation using acyl-CoA dehydrogenase	6/320	19/16672	1.04861e-06	1.88198e-05	1.33143e-05	ACADS/ACADSB/ACADVL/ACADM/ACOX1/ACADL	6
GO:0034374	low-density lipoprotein particle remodeling	5/320	11/16672	1.06109e-06	1.89532e-05	1.34086e-05	AGTR1/APOB/APOA2/AGT/APOE	5
GO:0015909	long-chain fatty acid transport	9/320	56/16672	1.08334e-06	1.92587e-05	1.36248e-05	ANXA1/ABCD1/AKT1/ACACA/ABCD2/AKT2/ACACB/PLIN2/APOE	9
GO:0050708	regulation of protein secretion	23/320	377/16672	1.12852e-06	1.99674e-05	1.41261e-05	ANG/SLC25A6/SLC25A5/ADCY5/ARF1/ANXA1/ADRA2A/AGTR2/ABAT/ADAM8/ANXA4/ANGPT1/ARRB1/ACHE/APOA1/ADRA2C/SLC25A4/APOA2/ARL2/APBB1/ABL1/ALOX15B/ARNTL	23
GO:0050727	regulation of inflammatory response	20/320	295/16672	1.14583e-06	2.01785e-05	1.42755e-05	BIRC3/APCS/ANXA1/ABR/A2M/AGTR1/BIRC2/XIAP/ADAM8/ADA/ADORA2B/ADORA1/ACP5/APOA1/APOD/AGT/ADCYAP1/AGER/AHSG/APOE	20
GO:0042451	purine nucleoside biosynthetic process	11/320	90/16672	1.18385e-06	2.0654e-05	1.46119e-05	APRT/AK4/AK1/ADSS/ADK/AK2/ACAT1/ADA/AMD1/ADSL/ALDOA	11
GO:0046129	purine ribonucleoside biosynthetic process	11/320	90/16672	1.18385e-06	2.0654e-05	1.46119e-05	APRT/AK4/AK1/ADSS/ADK/AK2/ACAT1/ADA/AMD1/ADSL/ALDOA	11
GO:2000146	negative regulation of cell motility	17/320	220/16672	1.25012e-06	2.17092e-05	1.53584e-05	ANGPT2/ABR/AGTR2/ADA/RHOB/ADORA1/APOD/ARHGAP4/RHOA/ARHGDIB/APEX1/ADARB1/ACVRL1/AIF1/APOH/ALOX15B/APOE	17
GO:0030301	cholesterol transport	10/320	73/16672	1.25634e-06	2.17167e-05	1.53637e-05	APOC1/APOC2/APOB/ABCA2/ABCA1/APOA4/APOA1/APOC3/APOA2/APOE	10
GO:0043542	endothelial cell migration	14/320	152/16672	1.39445e-06	2.39934e-05	1.69744e-05	ANGPT2/AGTR2/AKT1/RHOB/ANGPT1/APOA1/ANXA3/RHOA/ALOX12/AGT/AAMP/ACVRL1/APOH/APOE	14
GO:0015918	sterol transport	10/320	74/16672	1.42823e-06	2.44625e-05	1.73062e-05	APOC1/APOC2/APOB/ABCA2/ABCA1/APOA4/APOA1/APOC3/APOA2/APOE	10
GO:0045055	regulated exocytosis	19/320	274/16672	1.52426e-06	2.59886e-05	1.83859e-05	ACTN4/ARF1/ABR/ADRA2A/A2M/ACTN1/AP1G1/APP/ADORA2B/APOA1/ACTN2/ALDOA/ANXA3/ALB/APLP2/SERPINA3/A1BG/APOH/AHSG	19
GO:0035587	purinergic receptor signaling pathway	7/320	31/16672	1.59072e-06	2.6999e-05	1.91007e-05	ACPP/ADCY5/ADORA2A/ADA/ADORA2B/ADORA1/ADORA3	7
GO:0019218	regulation of steroid metabolic process	10/320	75/16672	1.62026e-06	2.73766e-05	1.93679e-05	APOC1/AGTR1/APOB/APOA4/APOA1/ACADVL/APOA2/AGT/ACADL/APOE	10
GO:0044706	multi-multicellular organism process	16/320	201/16672	1.74539e-06	2.93585e-05	2.077e-05	STS/ARG1/AMBP/ANGPT2/AKR1B1/ADM/AKT1/ADCY7/ADRA2C/AGT/AR/ARHGDIB/AGRP/ADCYAP1/ACVR2A/ACVR1B	16
GO:0010896	regulation of triglyceride catabolic process	5/320	12/16672	1.79044e-06	2.97166e-05	2.10233e-05	APOC2/APOA4/APOA1/APOC3/AADAC	5
GO:0019755	one-carbon compound transport	5/320	12/16672	1.79044e-06	2.97166e-05	2.10233e-05	AQP5/AQP1/AQP7/AQP9/AQP3	5
GO:0033604	negative regulation of catecholamine secretion	5/320	12/16672	1.79044e-06	2.97166e-05	2.10233e-05	ADRA2B/ADRA2A/AGTR2/ABAT/ADRA2C	5
GO:0007565	female pregnancy	15/320	178/16672	1.81186e-06	2.99397e-05	2.11811e-05	STS/ARG1/AMBP/ANGPT2/AKR1B1/ADM/AKT1/ADCY7/ADRA2C/AGT/AR/ARHGDIB/AGRP/ADCYAP1/ACVR1B	15
GO:0046128	purine ribonucleoside metabolic process	21/320	332/16672	1.88437e-06	3.10012e-05	2.19321e-05	ACPP/ARNT/ALDOC/APRT/AK4/PARP1/AK1/ADSS/ADK/AK2/ACAT1/ADA/AMD1/ACTN3/ALDOB/ADSL/ALDOA/ADCYAP1/AHCY/AMPD3/AMPD2	21
GO:0009119	ribonucleoside metabolic process	22/320	361/16672	1.9751e-06	3.2352e-05	2.28878e-05	ACPP/ARNT/ALDOC/APRT/AK4/PARP1/AK1/ADSS/ADK/AK2/ACAT1/ADA/AMD1/ACTN3/ALDOB/ADSL/ALDOA/ADCYAP1/APOBEC1/AHCY/AMPD3/AMPD2	22
GO:0034381	plasma lipoprotein particle clearance	7/320	32/16672	2.00283e-06	3.26636e-05	2.31082e-05	APOC1/APOC2/APOB/APOA1/APOC3/APOA2/APOE	7
GO:0042278	purine nucleoside metabolic process	21/320	335/16672	2.17358e-06	3.52948e-05	2.49697e-05	ACPP/ARNT/ALDOC/APRT/AK4/PARP1/AK1/ADSS/ADK/AK2/ACAT1/ADA/AMD1/ACTN3/ALDOB/ADSL/ALDOA/ADCYAP1/AHCY/AMPD3/AMPD2	21
GO:0019433	triglyceride catabolic process	7/320	33/16672	2.50051e-06	4.0255e-05	2.84788e-05	APOC2/APOB/APOA4/APOA1/APOC3/AADAC/APOE	7
GO:0045742	positive regulation of epidermal growth factor receptor signaling pathway	7/320	33/16672	2.50051e-06	4.0255e-05	2.84788e-05	ADRA2B/ADRA2A/AKT1/ADORA1/ADRA2C/AGT/FASLG	7
GO:0042157	lipoprotein metabolic process	13/320	138/16672	2.58383e-06	4.14187e-05	2.93021e-05	ALOX12B/APOC1/APOC2/APOB/ABCA1/APOA4/APOA1/APOC3/APOD/APOA2/ALB/APOBEC1/APOE	13
GO:0006471	protein ADP-ribosylation	6/320	22/16672	2.74678e-06	4.38433e-05	3.10174e-05	ART3/ART4/PARP4/PARP1/ARF4/ART1	6
GO:0030168	platelet activation	14/320	161/16672	2.76903e-06	4.40112e-05	3.11362e-05	ACTG1/ADRA2B/ADRA2A/ARRB2/ABAT/AKT1/RHOB/ARRB1/ADRA2C/RHOA/ALOX12/ACTB/RHOG/APOE	14
GO:0046040	IMP metabolic process	5/320	13/16672	2.86377e-06	4.5325e-05	3.20656e-05	AMPD1/ADSS/ADSL/AMPD3/AMPD2	5
GO:0033674	positive regulation of kinase activity	26/320	489/16672	2.9372e-06	4.62917e-05	3.27496e-05	ADCY3/ANG/ADCY5/ADRA2B/ADRA2A/ADCY8/ADAM8/ADRB2/AKT1/ADORA2B/ANGPT1/ADORA1/ARRB1/ADCY1/ADCY7/ADRA2C/RHOA/AGT/ADCY9/ACVR2B/ALK/ADCY2/ADCYAP1/ADCY6/ABL1/AGER	26
GO:0015837	amine transport	9/320	63/16672	3.00829e-06	4.72138e-05	3.34019e-05	ARG1/ADRA2B/ADRA2A/AGTR2/ABAT/GRK2/ADRA2C/AQP9/AGT	9
GO:1901186	positive regulation of ERBB signaling pathway	7/320	34/16672	3.09735e-06	4.84089e-05	3.42474e-05	ADRA2B/ADRA2A/AKT1/ADORA1/ADRA2C/AGT/FASLG	7
GO:0046879	hormone secretion	19/320	288/16672	3.18195e-06	4.95248e-05	3.50368e-05	SLC25A6/SLC25A5/ADCY5/ANXA1/ADRA2B/ADRA2A/AGTR1/AGTR2/ABAT/ADM/ADORA1/ARRB1/ADRA2C/SLC25A4/ARL2/AGT/ACVR2B/ADCYAP1/ARNTL	19
GO:0006081	cellular aldehyde metabolic process	9/320	64/16672	3.44218e-06	5.33537e-05	3.77457e-05	ALDH1A3/ALDH3B1/ALDOB/ADH5/ALDH9A1/ALDH1A1/ALDH3A1/ADH4/ALDH3A2	9
GO:0009167	purine ribonucleoside monophosphate metabolic process	18/320	264/16672	3.65646e-06	5.62112e-05	3.97672e-05	ARNT/ALDOC/APRT/AK4/PARP1/AK1/AMPD1/ADSS/ADK/AK2/ADA/ACTN3/ALDOB/ADSL/ALDOA/ADCYAP1/AMPD3/AMPD2	18
GO:0045922	negative regulation of fatty acid metabolic process	6/320	23/16672	3.6565e-06	5.62112e-05	3.97672e-05	APOC1/AKT1/APOC3/ACADVL/ACADL/ACACB	6
GO:0008203	cholesterol metabolic process	12/320	121/16672	3.6732e-06	5.62374e-05	3.97857e-05	APOC1/ACLY/APOB/ABCA1/APOF/APP/APOA4/APOA1/ACADVL/APOA2/ACADL/APOE	12
GO:0001659	temperature homeostasis	7/320	35/16672	3.80844e-06	5.80709e-05	4.10829e-05	ABAT/ADRB2/ADORA1/ACADVL/ADRB1/ADRB3/ACADL	7
GO:0046503	glycerolipid catabolic process	8/320	49/16672	3.8375e-06	5.80819e-05	4.10906e-05	APOC2/APOB/APOA4/APOA1/APOC3/APOA2/AADAC/APOE	8
GO:0031348	negative regulation of defense response	13/320	143/16672	3.84665e-06	5.80819e-05	4.10906e-05	APCS/ABR/ARRB2/A2M/ADA/ADAR/ADORA1/ACP5/APOA1/APOD/ADCYAP1/AGER/APOE	13
GO:0009126	purine nucleoside monophosphate metabolic process	18/320	265/16672	3.85561e-06	5.80819e-05	4.10906e-05	ARNT/ALDOC/APRT/AK4/PARP1/AK1/AMPD1/ADSS/ADK/AK2/ADA/ACTN3/ALDOB/ADSL/ALDOA/ADCYAP1/AMPD3/AMPD2	18
GO:0010632	regulation of epithelial cell migration	14/320	166/16672	3.96969e-06	5.95613e-05	4.21373e-05	ANGPT2/AGTR2/AKT1/RHOB/ANGPT1/ANXA3/RHOA/ALOX12/AGT/AAMP/ARSB/ACVRL1/APOH/APOE	14
GO:0042180	cellular ketone metabolic process	16/320	215/16672	4.19319e-06	6.2664e-05	4.43323e-05	APOC1/APOC2/ANXA1/AKR1B1/ADM/AKT1/APOA4/ABCD2/APOA1/APOC3/AKT2/ACADVL/ADH4/ACADL/AFP/ACACB	16
GO:1901657	glycosyl compound metabolic process	23/320	408/16672	4.27823e-06	6.36811e-05	4.50519e-05	ACPP/ARNT/ALDOC/APRT/AK4/PARP1/AK1/AKR1B1/ADSS/ADK/AK2/ACAT1/ADA/AMD1/ACTN3/ALDOB/ADSL/ALDOA/ADCYAP1/APOBEC1/AHCY/AMPD3/AMPD2	23
GO:0003085	negative regulation of systemic arterial blood pressure	5/320	14/16672	4.38483e-06	6.50099e-05	4.59919e-05	AGTR2/ADRA1A/ADRB2/ADRB1/ADRB3	5
GO:0034329	cell junction assembly	15/320	192/16672	4.63713e-06	6.81408e-05	4.82069e-05	ACTN4/ACTG1/APC/ACTN1/ACTN3/ARHGAP6/ACTN2/APOD/ANK2/RHOA/ARL2/AGT/RHOC/ACTB/ACVRL1	15
GO:0045744	negative regulation of G-protein coupled receptor protein signaling pathway	7/320	36/16672	4.65051e-06	6.81408e-05	4.82069e-05	ADRA2A/ARRB2/ADM/ADRB2/ADA/ARRB1/GRK2	7
GO:0045777	positive regulation of blood pressure	7/320	36/16672	4.65051e-06	6.81408e-05	4.82069e-05	ADRA1B/ADRA1A/ADORA1/ADRA1D/ADH5/ADRB1/AGT	7
GO:0015908	fatty acid transport	10/320	85/16672	5.16348e-06	7.53627e-05	5.33161e-05	ANXA1/AGTR2/ABCD1/AKT1/ACACA/ABCD2/AKT2/ACACB/PLIN2/APOE	10
GO:0009914	hormone transport	19/320	298/16672	5.22572e-06	7.59755e-05	5.37497e-05	SLC25A6/SLC25A5/ADCY5/ANXA1/ADRA2B/ADRA2A/AGTR1/AGTR2/ABAT/ADM/ADORA1/ARRB1/ADRA2C/SLC25A4/ARL2/AGT/ACVR2B/ADCYAP1/ARNTL	19
GO:0007599	hemostasis	21/320	355/16672	5.38718e-06	7.80206e-05	5.51965e-05	ACTG1/ANXA2/ADORA2A/ANXA5/ADRA2B/ADRA2A/ARRB2/A2M/ABAT/AKT1/RHOB/ARRB1/ADRA2C/RHOA/ALOX12/ASIC2/ANXA7/ACTB/RHOG/APOH/APOE	21
GO:1902652	secondary alcohol metabolic process	12/320	126/16672	5.61023e-06	8.09383e-05	5.72606e-05	APOC1/ACLY/APOB/ABCA1/APOF/APP/APOA4/APOA1/ACADVL/APOA2/ACADL/APOE	12
GO:0046883	regulation of hormone secretion	17/320	246/16672	5.70422e-06	8.19791e-05	5.7997e-05	SLC25A6/SLC25A5/ADCY5/ANXA1/ADRA2B/ADRA2A/AGTR1/AGTR2/ABAT/ADORA1/ARRB1/ADRA2C/SLC25A4/ARL2/AGT/ADCYAP1/ARNTL	17
GO:0009116	nucleoside metabolic process	22/320	386/16672	5.83056e-06	8.34749e-05	5.90552e-05	ACPP/ARNT/ALDOC/APRT/AK4/PARP1/AK1/ADSS/ADK/AK2/ACAT1/ADA/AMD1/ACTN3/ALDOB/ADSL/ALDOA/ADCYAP1/APOBEC1/AHCY/AMPD3/AMPD2	22
GO:0040013	negative regulation of locomotion	17/320	248/16672	6.35318e-06	9.02755e-05	6.38664e-05	ANGPT2/ABR/AGTR2/ADA/RHOB/ADORA1/APOD/ARHGAP4/RHOA/ARHGDIB/APEX1/ADARB1/ACVRL1/AIF1/APOH/ALOX15B/APOE	17
GO:0002029	desensitization of G-protein coupled receptor protein signaling pathway	5/320	15/16672	6.47404e-06	9.02755e-05	6.38664e-05	ARRB2/ADM/ADRB2/ARRB1/GRK2	5
GO:0006000	fructose metabolic process	5/320	15/16672	6.47404e-06	9.02755e-05	6.38664e-05	ALDOC/AKR1B1/ALDOB/ALDOA/ALDH1A1	5
GO:0014061	regulation of norepinephrine secretion	5/320	15/16672	6.47404e-06	9.02755e-05	6.38664e-05	ADRA2B/ADRA2A/AGTR2/ADRA2C/AGT	5
GO:0022401	negative adaptation of signaling pathway	5/320	15/16672	6.47404e-06	9.02755e-05	6.38664e-05	ARRB2/ADM/ADRB2/ARRB1/GRK2	5
GO:0032890	regulation of organic acid transport	5/320	15/16672	6.47404e-06	9.02755e-05	6.38664e-05	ARG1/ABAT/AKT1/AKT2/AGT	5
GO:0051953	negative regulation of amine transport	5/320	15/16672	6.47404e-06	9.02755e-05	6.38664e-05	ADRA2B/ADRA2A/AGTR2/ABAT/ADRA2C	5
GO:0042886	amide transport	18/320	276/16672	6.78889e-06	9.43154e-05	6.67244e-05	SLC25A6/SLC25A5/ADCY5/ANXA1/ADRA2A/ABAT/ABCA1/AQP7/ADORA1/ARRB1/ADRA2C/SLC25A4/ARL2/AQP9/ACVR2B/AQP3/ADCYAP1/ARNTL	18
GO:0009161	ribonucleoside monophosphate metabolic process	18/320	277/16672	7.13615e-06	9.87738e-05	6.98785e-05	ARNT/ALDOC/APRT/AK4/PARP1/AK1/AMPD1/ADSS/ADK/AK2/ADA/ACTN3/ALDOB/ADSL/ALDOA/ADCYAP1/AMPD3/AMPD2	18
GO:0042455	ribonucleoside biosynthetic process	11/320	109/16672	7.90078e-06	0.000108955	7.70816e-05	APRT/AK4/AK1/ADSS/ADK/AK2/ACAT1/ADA/AMD1/ADSL/ALDOA	11
GO:0046164	alcohol catabolic process	7/320	39/16672	8.15594e-06	0.000111653	7.89901e-05	ALDH2/ALDH3B2/ALDH3B1/ADH7/ADH4/ALDH1B1/APOE	7
GO:0050433	regulation of catecholamine secretion	7/320	39/16672	8.15594e-06	0.000111653	7.89901e-05	ADRA2B/ADRA2A/AGTR2/ABAT/GRK2/ADRA2C/AGT	7
GO:0048243	norepinephrine secretion	5/320	16/16672	9.26909e-06	0.000126386	8.9413e-05	ADRA2B/ADRA2A/AGTR2/ADRA2C/AGT	5
GO:0048259	regulation of receptor-mediated endocytosis	9/320	72/16672	9.29952e-06	0.000126386	8.9413e-05	APOC1/ANXA2/ARF1/APOC2/ARRB2/ANGPT1/ARRB1/APOC3/ARF6	9
GO:0051952	regulation of amine transport	8/320	55/16672	9.37525e-06	0.000126955	8.98158e-05	ARG1/ADRA2B/ADRA2A/AGTR2/ABAT/GRK2/ADRA2C/AGT	8
GO:0032535	regulation of cellular component size	20/320	340/16672	9.81966e-06	0.000132495	9.37348e-05	ARF1/AQP6/AQP5/AQP8/AQP1/AKT1/AQP7/AQP4/ACTN2/AQP2/ARHGAP4/ADD2/AQP9/ARF6/AQP3/ANXA7/ADD1/ABL1/ALOX15/APOE	20
GO:0016125	sterol metabolic process	12/320	135/16672	1.1426e-05	0.000153616	0.000108677	APOC1/ACLY/APOB/ABCA1/APOF/APP/APOA4/APOA1/ACADVL/APOA2/ACADL/APOE	12
GO:0046320	regulation of fatty acid oxidation	6/320	28/16672	1.25853e-05	0.000167998	0.000118852	AKT1/ABCD2/AKT2/ACADVL/ACADL/ACACB	6
GO:0050690	regulation of defense response to virus by virus	6/320	28/16672	1.25853e-05	0.000167998	0.000118852	ARF1/AP1G1/AP2A2/AP1B1/AP2A1/AP2B1	6
GO:0051591	response to cAMP	10/320	94/16672	1.28122e-05	0.00017042	0.000120565	AREG/BIRC2/AQP8/AQP1/APP/AQP9/AANAT/ALDH3A1/APEX1/AGXT	10
GO:0023058	adaptation of signaling pathway	5/320	17/16672	1.29253e-05	0.000170439	0.000120579	ARRB2/ADM/ADRB2/ARRB1/GRK2	5
GO:0048261	negative regulation of receptor-mediated endocytosis	5/320	17/16672	1.29253e-05	0.000170439	0.000120579	APOC1/ANXA2/APOC2/APOC3/ARF6	5
GO:0006979	response to oxidative stress	21/320	376/16672	1.29499e-05	0.000170439	0.000120579	ARNT/ARG1/NUDT2/ANXA1/PARP1/AREG/AKR1B1/AQP1/ADA/AKT1/APP/ALDH3B1/RHOB/APOA4/APOD/APEX1/ALAD/AIF1/ABL1/APOE/ARNTL	21
GO:0007586	digestion	13/320	160/16672	1.31632e-05	0.000172641	0.000122137	AMY1C/AMY2A/ADRA2A/AQP5/AMY1A/AQP1/AMY1B/APOA4/APOA1/APOA2/ACO1/SERPINA3/AMY2B	13
GO:0050777	negative regulation of immune response	11/320	115/16672	1.32297e-05	0.00017288	0.000122306	AMBP/ANXA1/ABR/ARRB2/A2M/ADAR/ANGPT1/APOA1/APOA2/ADCYAP1/ALOX15	11
GO:0015718	monocarboxylic acid transport	12/320	137/16672	1.32737e-05	0.00017288	0.000122306	ANXA1/AGTR2/ABCD1/AKT1/ACACA/ABCD2/AKT2/ALB/AQP9/ACACB/PLIN2/APOE	12
GO:0009123	nucleoside monophosphate metabolic process	18/320	290/16672	1.33514e-05	0.000173292	0.000122597	ARNT/ALDOC/APRT/AK4/PARP1/AK1/AMPD1/ADSS/ADK/AK2/ADA/ACTN3/ALDOB/ADSL/ALDOA/ADCYAP1/AMPD3/AMPD2	18
GO:0050432	catecholamine secretion	7/320	42/16672	1.36169e-05	0.000176128	0.000124603	ADRA2B/ADRA2A/AGTR2/ABAT/GRK2/ADRA2C/AGT	7
GO:1901654	response to ketone	13/320	161/16672	1.40762e-05	0.000181443	0.000128364	ADCY3/ARG1/ADCY5/PARP1/AKR1B1/AGTR2/AQP1/AKT1/ACACA/ADCY1/ADCY2/AANAT/ADCY6	13
GO:0007162	negative regulation of cell adhesion	15/320	211/16672	1.44977e-05	0.000186236	0.000131754	ACTN4/ARHGDIG/ANGPT2/ANXA1/ARHGDIA/ABAT/ANGPT1/ARHGAP6/APOA1/APOD/ALOX12/ADAM10/ARHGDIB/ACVRL1/ABL1	15
GO:0046031	ADP metabolic process	9/320	76/16672	1.45548e-05	0.000186331	0.000131822	ARNT/ALDOC/AK4/AK1/AK2/ACTN3/ALDOB/ALDOA/AMPD3	9
GO:0051048	negative regulation of secretion	14/320	186/16672	1.47272e-05	0.000187897	0.00013293	ANXA1/ABR/ADRA2B/ADRA2A/AGTR2/ABAT/ADA/ANXA4/ANGPT1/ADORA1/APOA1/ADRA2C/APOA2/ASIC1	14
GO:0007596	blood coagulation	20/320	350/16672	1.49908e-05	0.000190612	0.00013485	ACTG1/ANXA2/ADORA2A/ANXA5/ADRA2B/ADRA2A/ARRB2/A2M/ABAT/AKT1/RHOB/ARRB1/ADRA2C/RHOA/ALOX12/ASIC2/ACTB/RHOG/APOH/APOE	20
GO:0001667	ameboidal-type cell migration	19/320	322/16672	1.57086e-05	0.000199065	0.00014083	ANGPT2/ACVR1/AGTR2/AKT1/RHOB/ANGPT1/APOA1/ANXA3/ARHGAP4/RHOA/ALOX12/AGT/ARHGDIB/AAMP/ARSB/ACVRL1/APOH/ACVR1B/APOE	19
GO:0045776	negative regulation of blood pressure	7/320	43/16672	1.59995e-05	0.000202067	0.000142955	AGTR2/ADRA1A/ABAT/ADRB2/ADORA1/ADRB1/ADRB3	7
GO:0060627	regulation of vesicle-mediated transport	22/320	413/16672	1.6823e-05	0.000211755	0.000149808	ACTN4/APOC1/ANXA2/ARF1/APOC2/ANXA1/ABR/ADRA2A/ARRB2/AP1G1/ADORA2B/ANGPT1/ARRB1/APOC3/ACTN2/AKT2/ARF6/ABL2/ABL1/ALOX15/AHSG/BIN1	22
GO:0006639	acylglycerol metabolic process	11/320	118/16672	1.69065e-05	0.000212094	0.000150048	ANG/APOC1/APOC2/APOB/APOA4/APOA1/APOC3/APOA2/AADAC/APOH/APOE	11
GO:0007568	aging	17/320	268/16672	1.75421e-05	0.000219335	0.000155171	ARG1/APAF1/AMFR/ADRA1A/ABAT/ADM/ADA/AKT1/APOD/ALOX12/AGT/AMH/ADRB3/ALDH3A1/APEX1/ABL1/ARNTL	17
GO:0050817	coagulation	20/320	354/16672	1.76683e-05	0.000220179	0.000155768	ACTG1/ANXA2/ADORA2A/ANXA5/ADRA2B/ADRA2A/ARRB2/A2M/ABAT/AKT1/RHOB/ARRB1/ADRA2C/RHOA/ALOX12/ASIC2/ACTB/RHOG/APOH/APOE	20
GO:1903531	negative regulation of secretion by cell	13/320	165/16672	1.8309e-05	0.00022598	0.000159872	ANXA1/ABR/ADRA2B/ADRA2A/AGTR2/ABAT/ANXA4/ANGPT1/ADORA1/APOA1/ADRA2C/APOA2/ASIC1	13
GO:0006638	neutral lipid metabolic process	11/320	119/16672	1.83145e-05	0.00022598	0.000159872	ANG/APOC1/APOC2/APOB/APOA4/APOA1/APOC3/APOA2/AADAC/APOH/APOE	11
GO:0009163	nucleoside biosynthetic process	11/320	119/16672	1.83145e-05	0.00022598	0.000159872	APRT/AK4/AK1/ADSS/ADK/AK2/ACAT1/ADA/AMD1/ADSL/ALDOA	11
GO:0048771	tissue remodeling	12/320	142/16672	1.90783e-05	0.000234631	0.000165992	ARG1/ANXA1/ABR/AGTR2/ADAM8/ADRB2/ACP5/JAG1/AGT/ACVR2B/ACVRL1/AGER	12
GO:0045923	positive regulation of fatty acid metabolic process	6/320	30/16672	1.92043e-05	0.00023541	0.000166543	APOC2/ANXA1/APOA4/ABCD2/APOA1/AKT2	6
GO:0007584	response to nutrient	13/320	166/16672	1.95273e-05	0.00023859	0.000168793	ARG1/APAF1/ALPL/ABCA1/ADA/ADSL/APOA1/ASCL1/AQP3/ALDH3A1/ARSB/ALAD/AHCY	13
GO:1901659	glycosyl compound biosynthetic process	11/320	121/16672	2.14381e-05	0.000261085	0.000184708	APRT/AK4/AK1/ADSS/ADK/AK2/ACAT1/ADA/AMD1/ADSL/ALDOA	11
GO:0006887	exocytosis	21/320	389/16672	2.15171e-05	0.0002612	0.000184788	ACTN4/ANK1/ARF1/ANXA1/ABR/ADRA2A/A2M/ACTN1/AP1G1/APP/ADORA2B/APOA1/ACTN2/ALDOA/ANXA3/ALB/APLP2/SERPINA3/A1BG/APOH/AHSG	21
GO:0034330	cell junction organization	16/320	246/16672	2.28129e-05	0.000276036	0.000195285	ACTN4/ANG/ACTG1/APC/ACTN1/ACTN3/ARHGAP6/ACTN2/APOD/ANK2/RHOA/ARL2/AGT/RHOC/ACTB/ACVRL1	16
GO:0045907	positive regulation of vasoconstriction	6/320	31/16672	2.34316e-05	0.000282611	0.000199936	ADRA1B/ADRA1A/AKT1/ADRA2C/ADRA1D/ABL1	6
GO:0015874	norepinephrine transport	5/320	19/16672	2.35331e-05	0.000282926	0.000200159	ADRA2B/ADRA2A/AGTR2/ADRA2C/AGT	5
GO:0006188	IMP biosynthetic process	4/320	10/16672	2.55322e-05	0.000304035	0.000215093	AMPD1/ADSL/AMPD3/AMPD2	4
GO:0046689	response to mercury ion	4/320	10/16672	2.55322e-05	0.000304035	0.000215093	AQP1/AQP2/AQP9/ALAD	4
GO:0051006	positive regulation of lipoprotein lipase activity	4/320	10/16672	2.55322e-05	0.000304035	0.000215093	APOC2/APOA4/APOA1/APOH	4
GO:0010631	epithelial cell migration	15/320	222/16672	2.63836e-05	0.00031318	0.000221563	ANGPT2/AGTR2/AKT1/RHOB/ANGPT1/APOA1/ANXA3/RHOA/ALOX12/AGT/AAMP/ARSB/ACVRL1/APOH/APOE	15
GO:0031623	receptor internalization	9/320	82/16672	2.70717e-05	0.000320335	0.000226624	ANXA2/ARF1/ARRB2/ADM/ANGPT1/ARRB1/GRK2/ACHE/GRK3	9
GO:0006641	triglyceride metabolic process	10/320	103/16672	2.87144e-05	0.000337642	0.000238868	APOC1/APOC2/APOB/APOA4/APOA1/APOC3/APOA2/AADAC/APOH/APOE	10
GO:0050728	negative regulation of inflammatory response	10/320	103/16672	2.87144e-05	0.000337642	0.000238868	APCS/ABR/ADA/ADORA1/ACP5/APOA1/APOD/ADCYAP1/AGER/APOE	10
GO:0051353	positive regulation of oxidoreductase activity	7/320	47/16672	2.92401e-05	0.000342748	0.000242481	AGTR1/AGTR2/AKT1/AGT/ABL2/ABL1/APOE	7
GO:0090132	epithelium migration	15/320	225/16672	3.08476e-05	0.000358682	0.000253753	ANGPT2/AGTR2/AKT1/RHOB/ANGPT1/APOA1/ANXA3/RHOA/ALOX12/AGT/AAMP/ARSB/ACVRL1/APOH/APOE	15
GO:0045932	negative regulation of muscle contraction	5/320	20/16672	3.08862e-05	0.000358682	0.000253753	ADRB2/ADORA2B/ADORA1/GRK2/ADRA2C	5
GO:1903792	negative regulation of anion transport	5/320	20/16672	3.08862e-05	0.000358682	0.000253753	AGTR2/ABAT/AKT1/ADORA1/AKT2	5
GO:0046890	regulation of lipid biosynthetic process	11/320	126/16672	3.13366e-05	0.000362789	0.000256659	APOC1/APOC2/ANXA1/APOB/AKT1/APOA4/APOA1/APOC3/ACADVL/ACADL/APOE	11
GO:0055090	acylglycerol homeostasis	6/320	33/16672	3.4127e-05	0.000392669	0.000277798	APOC2/APOA4/APOA1/APOC3/APOC4/APOE	6
GO:0070328	triglyceride homeostasis	6/320	33/16672	3.4127e-05	0.000392669	0.000277798	APOC2/APOA4/APOA1/APOC3/APOC4/APOE	6
GO:0010565	regulation of cellular ketone metabolic process	12/320	151/16672	3.52231e-05	0.000404043	0.000285844	APOC1/APOC2/ANXA1/AKT1/APOA4/ABCD2/APOA1/APOC3/AKT2/ACADVL/ACADL/ACACB	12
GO:0001655	urogenital system development	18/320	312/16672	3.53774e-05	0.000404575	0.000286221	ANGPT2/ANXA1/AKR1B1/AGTR1/AGTR2/ACTA2/ACAT1/ARL3/ANGPT1/AQP2/JAG1/AGT/ACVR2B/AR/AMH/ARG2/ALOX15B/AMPD2	18
GO:0032102	negative regulation of response to external stimulus	16/320	257/16672	3.8837e-05	0.000442457	0.000313021	ANXA2/APCS/ANGPT2/ABR/ABAT/ADA/ADORA1/ACP5/APOA1/APOD/ALOX12/ADCYAP1/AIF1/APOH/AGER/APOE	16
GO:0032372	negative regulation of sterol transport	4/320	11/16672	3.95156e-05	0.000442457	0.000313021	APOC1/APOC2/APOC3/APOA2	4
GO:0032375	negative regulation of cholesterol transport	4/320	11/16672	3.95156e-05	0.000442457	0.000313021	APOC1/APOC2/APOC3/APOA2	4
GO:0042759	long-chain fatty acid biosynthetic process	4/320	11/16672	3.95156e-05	0.000442457	0.000313021	ALOX12B/ALOX12/ALOX15/ALOX15B	4
GO:0045741	positive regulation of epidermal growth factor-activated receptor activity	4/320	11/16672	3.95156e-05	0.000442457	0.000313021	ADRA2B/ADRA2A/ADORA1/ADRA2C	4
GO:0061365	positive regulation of triglyceride lipase activity	4/320	11/16672	3.95156e-05	0.000442457	0.000313021	APOC2/APOA4/APOA1/APOH	4
GO:1901568	fatty acid derivative metabolic process	4/320	11/16672	3.95156e-05	0.000442457	0.000313021	ALOX5AP/ALOX5/ALOX12/ALOX15	4
GO:0023061	signal release	21/320	406/16672	4.02783e-05	0.000449654	0.000318113	SLC25A6/SLC25A5/ADCY5/ANXA1/ADRA2B/ADRA2A/APBA1/AGTR1/AGTR2/ABAT/ADM/ADORA1/ARRB1/ADRA2C/SLC25A4/ARL2/AGT/ACVR2B/ASIC1/ADCYAP1/ARNTL	21
GO:0043094	cellular metabolic compound salvage	6/320	34/16672	4.07762e-05	0.000453862	0.000321089	APRT/AMPD1/ADK/ADA/AMPD3/AMPD2	6
GO:0010951	negative regulation of endopeptidase activity	15/320	231/16672	4.18151e-05	0.000463431	0.000327859	BIRC3/AMBP/ARRB2/A2M/BIRC2/XIAP/AQP1/AKT1/APP/BIRC5/ARRB1/APLP2/AGT/SERPINA3/AHSG	15
GO:0031214	biomineral tissue development	11/320	130/16672	4.1883e-05	0.000463431	0.000327859	AMBN/ALPL/ACVR1/ADRB2/AMELX/ACVR2B/AMELY/ACVR2A/ASGR2/ALOX15/AHSG	11
GO:0043535	regulation of blood vessel endothelial cell migration	7/320	50/16672	4.42078e-05	0.000487716	0.00034504	ANGPT2/AGTR2/AKT1/ANGPT1/RHOA/ACVRL1/APOE	7
GO:0046942	carboxylic acid transport	16/320	261/16672	4.67586e-05	0.000514345	0.000363879	ANXA1/APBA1/AGTR2/ABAT/ABCD1/AKT1/ACACA/ADORA1/ABCD2/AKT2/ALB/AQP9/ACACB/AGXT/PLIN2/APOE	16
GO:0001525	angiogenesis	21/320	411/16672	4.80721e-05	0.000527246	0.000373006	ANG/ANXA2/ANGPT2/ACVR1/ADM/ADAM8/AQP1/RHOB/ANGPT1/ANPEP/APOD/ANXA3/RHOA/ALOX12/JAG1/AGT/FASLG/AAMP/KLK3/ACVRL1/APOH	21
GO:1901565	organonitrogen compound catabolic process	19/320	350/16672	4.92997e-05	0.000539135	0.000381416	ACY1/ARG1/AMBP/AOX1/ASL/AMT/ABAT/ACADSB/ACAT1/ADA/ANPEP/ACAN/ARSB/ASPA/APOBEC1/ACADL/AGXT/AHCY/AMPD3	19
GO:0010657	muscle cell apoptotic process	7/320	51/16672	5.04071e-05	0.000549643	0.00038885	APAF1/ARRB2/ARRB1/ALOX12/AGT/ADCYAP1/APOH	7
GO:0007015	actin filament organization	18/320	323/16672	5.55318e-05	0.000603768	0.000427142	ACTN4/ANG/ARF1/ACTN1/ARRB1/ARHGAP6/APOA1/ACTN2/ALDOA/RHOA/ADD2/ARF6/ACTA1/ADD1/AIF1/ABL1/ALOX15/ACTC1	18
GO:1900274	regulation of phospholipase C activity	6/320	36/16672	5.71795e-05	0.000619885	0.000438544	ANG/ADRA1A/AGT/ABL2/ABL1/ADCYAP1R1	6
GO:0009135	purine nucleoside diphosphate metabolic process	9/320	91/16672	6.22665e-05	0.000671154	0.000474815	ARNT/ALDOC/AK4/AK1/AK2/ACTN3/ALDOB/ALDOA/AMPD3	9
GO:0009179	purine ribonucleoside diphosphate metabolic process	9/320	91/16672	6.22665e-05	0.000671154	0.000474815	ARNT/ALDOC/AK4/AK1/AK2/ACTN3/ALDOB/ALDOA/AMPD3	9
GO:1901616	organic hydroxy compound catabolic process	7/320	53/16672	6.49466e-05	0.000698037	0.000493833	ALDH2/ALDH3B2/ALDH3B1/ADH7/ADH4/ALDH1B1/APOE	7
GO:0002790	peptide secretion	15/320	241/16672	6.78063e-05	0.00072669	0.000514104	SLC25A6/SLC25A5/ADCY5/ANXA1/ADRA2A/ABAT/ABCA1/ADORA1/ARRB1/ADRA2C/SLC25A4/ARL2/ACVR2B/ADCYAP1/ARNTL	15
GO:0051259	protein oligomerization	22/320	454/16672	6.98398e-05	0.000746351	0.000528014	ARG1/ANXA2/BIRC3/APAF1/ASL/AMFR/BIRC2/ALOX5AP/ACAT1/ACACA/ADSL/ACHE/ACTN2/ALDOA/AR/ANXA6/FAS/ASIC1/ALAD/ACADL/ACACB/ACVRL1	22
GO:0048514	blood vessel morphogenesis	23/320	487/16672	7.06568e-05	0.000752937	0.000532673	ANG/ANXA2/ANGPT2/ACVR1/ADM/APOB/ADAM8/AQP1/RHOB/ANGPT1/ANPEP/APOD/ANXA3/RHOA/ALOX12/JAG1/AGT/FASLG/AAMP/KLK3/ACVRL1/APOH/APOE	23
GO:0010466	negative regulation of peptidase activity	15/320	242/16672	7.10548e-05	0.000755033	0.000534156	BIRC3/AMBP/ARRB2/A2M/BIRC2/XIAP/AQP1/AKT1/APP/BIRC5/ARRB1/APLP2/AGT/SERPINA3/AHSG	15
GO:0051937	catecholamine transport	7/320	54/16672	7.34063e-05	0.000777816	0.000550274	ADRA2B/ADRA2A/AGTR2/ABAT/GRK2/ADRA2C/AGT	7
GO:0009185	ribonucleoside diphosphate metabolic process	9/320	93/16672	7.38966e-05	0.000780806	0.000552389	ARNT/ALDOC/AK4/AK1/AK2/ACTN3/ALDOB/ALDOA/AMPD3	9
GO:0043534	blood vessel endothelial cell migration	8/320	73/16672	7.67458e-05	0.000808633	0.000572076	ANGPT2/AGTR2/AKT1/ANGPT1/APOA1/RHOA/ACVRL1/APOE	8
GO:0052548	regulation of endopeptidase activity	19/320	363/16672	8.01627e-05	0.00084227	0.000595873	BIRC3/AMBP/APAF1/ARRB2/A2M/BIRC2/XIAP/AQP1/AKT1/APP/BIRC5/ARRB1/APLP2/ALOX12/AGT/FASLG/FAS/SERPINA3/AHSG	19
GO:0045216	cell-cell junction organization	14/320	218/16672	8.46234e-05	0.000886655	0.000627273	ACTN4/ANG/APC/ACTN1/ACTN3/ARHGAP6/ACTN2/APOD/ANK2/RHOA/ARL2/AGT/RHOC/ACVRL1	14
GO:0046545	development of primary female sexual characteristics	9/320	95/16672	8.73011e-05	0.000912163	0.000645319	ANG/ARRB2/ARRB1/AMHR2/AMH/ADCYAP1/AFP/ACVR1B/ADCYAP1R1	9
GO:0010596	negative regulation of endothelial cell migration	6/320	39/16672	9.12548e-05	0.000950824	0.000672671	ANGPT2/AGTR2/RHOA/ACVRL1/APOH/APOE	6
GO:0034599	cellular response to oxidative stress	14/320	220/16672	9.32924e-05	0.000969363	0.000685786	ARNT/ARG1/ANXA1/PARP1/AKR1B1/AQP1/AKT1/ALDH3B1/RHOB/APOA4/APEX1/AIF1/ABL1/ARNTL	14
GO:0007176	regulation of epidermal growth factor-activated receptor activity	5/320	25/16672	9.78218e-05	0.00101083	0.000715119	ADRA2B/ADRA2A/APP/ADORA1/ADRA2C	5
GO:0043537	negative regulation of blood vessel endothelial cell migration	5/320	25/16672	9.78218e-05	0.00101083	0.000715119	ANGPT2/AGTR2/RHOA/ACVRL1/APOE	5
GO:0045471	response to ethanol	10/320	119/16672	9.88674e-05	0.00101882	0.000720777	BIRC2/ABAT/ADCY7/ADH6/ADH7/ADCYAP1/ALAD/APOBEC1/ADCYAP1R1/ACTC1	10
GO:0014074	response to purine-containing compound	11/320	143/16672	9.98217e-05	0.00102584	0.00072574	AREG/BIRC2/AQP8/ADSS/AQP1/APP/AQP9/AANAT/ALDH3A1/APEX1/AGXT	11
GO:0060135	maternal process involved in female pregnancy	7/320	57/16672	0.000104329	0.00106923	0.000756437	ARG1/ANGPT2/AKR1B1/AKT1/ADCY7/AR/AGRP	7
GO:0043687	post-translational protein modification	6/320	40/16672	0.000105642	0.00107974	0.000763874	ARSD/STS/ARSA/ARSF/ARSE/ARSB	6
GO:0002697	regulation of immune effector process	17/320	310/16672	0.000108426	0.00110518	0.000781868	BIRC3/ARF1/ANXA1/ABR/ARRB2/A2M/BIRC2/AP1G1/ADORA2B/ANGPT1/AP2A2/APOA1/APOA2/AP1B1/AP2A1/AGER/AP2B1	17
GO:0001976	neurological system process involved in regulation of systemic arterial blood pressure	4/320	14/16672	0.000114518	0.00115472	0.00081692	AGTR2/ADRA1A/AGT/ASIC2	4
GO:0045717	negative regulation of fatty acid biosynthetic process	4/320	14/16672	0.000114518	0.00115472	0.00081692	APOC1/APOC3/ACADVL/ACADL	4
GO:0045723	positive regulation of fatty acid biosynthetic process	4/320	14/16672	0.000114518	0.00115472	0.00081692	APOC2/ANXA1/APOA4/APOA1	4
GO:0045986	negative regulation of smooth muscle contraction	4/320	14/16672	0.000114518	0.00115472	0.00081692	ADRB2/ADORA2B/ADORA1/ADRA2C	4
GO:0001974	blood vessel remodeling	6/320	41/16672	0.000121775	0.00122461	0.000866361	ABR/AGTR2/JAG1/AGT/ACVR2B/ACVRL1	6
GO:0051047	positive regulation of secretion	18/320	346/16672	0.000133005	0.00133145	0.000941946	ANG/ALOX12B/ARF1/AGTR2/ABAT/ADAM8/AP1G1/AQP1/ADORA2B/ADORA1/ARRB1/GRK2/ACHE/AGT/ADCYAP1/APBB1/ABL1/ALOX15B	18
GO:0015833	peptide transport	15/320	256/16672	0.000133109	0.00133145	0.000941946	SLC25A6/SLC25A5/ADCY5/ANXA1/ADRA2A/ABAT/ABCA1/ADORA1/ARRB1/ADRA2C/SLC25A4/ARL2/ACVR2B/ADCYAP1/ARNTL	15
GO:0061041	regulation of wound healing	10/320	124/16672	0.000139383	0.0013905	0.000983722	ANXA2/APCS/ANXA1/ADRA2A/ABAT/ALOX12/ASIC2/APOH/AGER/APOE	10
GO:0015711	organic anion transport	17/320	317/16672	0.000141881	0.00141166	0.000998695	ANXA1/APBA1/AGTR2/ABAT/AQP1/ABCD1/AKT1/ACACA/ADORA1/ABCD2/AKT2/ALB/AQP9/ACACB/AGXT/PLIN2/APOE	17
GO:0045987	positive regulation of smooth muscle contraction	5/320	27/16672	0.000144033	0.00142928	0.00101116	ADRA1B/ADRA1A/ABAT/ADA/ADRA1D	5
GO:0061045	negative regulation of wound healing	7/320	60/16672	0.000145096	0.00143603	0.00101594	ANXA2/APCS/ABAT/ALOX12/APOH/AGER/APOE	7
GO:2000273	positive regulation of receptor activity	6/320	43/16672	0.000159877	0.00157816	0.00111648	ANXA2/ADRA2B/ADRA2A/ADORA1/ACTN2/ADRA2C	6
GO:0000302	response to reactive oxygen species	13/320	205/16672	0.000171042	0.0016817	0.00118974	ARG1/NUDT2/ANXA1/AREG/AKR1B1/AQP1/ADA/RHOB/APOA4/APOD/APEX1/ABL1/APOE	13
GO:0006665	sphingolipid metabolic process	11/320	152/16672	0.000171788	0.0016817	0.00118974	ARSD/STS/ARSA/ALOX12B/ARSF/ALDH3B2/ALDH3B1/ASAH1/ARSE/ARSB/ALDH3A2	11
GO:0097305	response to alcohol	11/320	152/16672	0.000171788	0.0016817	0.00118974	BIRC2/ABAT/ABCA1/ADCY7/ADH6/ADH7/ADCYAP1/ALAD/APOBEC1/ADCYAP1R1/ACTC1	11
GO:0045909	positive regulation of vasodilation	5/320	28/16672	0.000172609	0.0016817	0.00118974	AGTR2/ADM/ALOX12/AGT/ADCYAP1	5
GO:0070266	necroptotic process	5/320	28/16672	0.000172609	0.0016817	0.00118974	BIRC3/BIRC2/SLC25A4/FASLG/FAS	5
GO:0043154	negative regulation of cysteine-type endopeptidase activity involved in apoptotic process	8/320	82/16672	0.000175295	0.00169904	0.00120201	BIRC3/ARRB2/BIRC2/XIAP/AQP1/AKT1/BIRC5/ARRB1	8
GO:0050688	regulation of defense response to virus	8/320	82/16672	0.000175295	0.00169904	0.00120201	BIRC3/ARF1/BIRC2/AP1G1/AP2A2/AP1B1/AP2A1/AP2B1	8
GO:0052547	regulation of peptidase activity	19/320	386/16672	0.000178149	0.00172226	0.00121843	BIRC3/AMBP/APAF1/ARRB2/A2M/BIRC2/XIAP/AQP1/AKT1/APP/BIRC5/ARRB1/APLP2/ALOX12/AGT/FASLG/FAS/SERPINA3/AHSG	19
GO:0042445	hormone metabolic process	12/320	180/16672	0.000190548	0.0018374	0.00129988	ARNT/ASMT/ALDH1A3/AKR1B1/ADM/AGT/ALDH9A1/ALDH1A1/ADH7/AANAT/ADH4/AFP	12
GO:0046683	response to organophosphorus	10/320	129/16672	0.000193096	0.00185243	0.00131052	AREG/BIRC2/AQP8/AQP1/APP/AQP9/AANAT/ALDH3A1/APEX1/AGXT	10
GO:0071248	cellular response to metal ion	10/320	129/16672	0.000193096	0.00185243	0.00131052	AOC1/PARP1/ALOX5AP/AQP1/ANK3/ADCY1/AQP2/FAS/ALAD/ALOX15	10
GO:0006820	anion transport	21/320	454/16672	0.000193881	0.00185523	0.0013125	AQP6/ASNA1/ANXA1/APBA1/AGTR2/ABAT/ABCA1/AQP1/ABCD1/AKT1/ACACA/ABCC6/ADORA1/ABCD2/AKT2/ALB/AQP9/ACACB/AGXT/PLIN2/APOE	21
GO:0010744	positive regulation of macrophage derived foam cell differentiation	4/320	16/16672	0.000201986	0.00192297	0.00136042	AGTR1/APOB/AGT/ALOX15B	4
GO:0031998	regulation of fatty acid beta-oxidation	4/320	16/16672	0.000201986	0.00192297	0.00136042	AKT1/ABCD2/AKT2/ACACB	4
GO:0000038	very long-chain fatty acid metabolic process	5/320	29/16672	0.000205316	0.0019448	0.00137587	ABCD1/ABCD2/ACADVL/ACAA1/ACOX1	5
GO:0010743	regulation of macrophage derived foam cell differentiation	5/320	29/16672	0.000205316	0.0019448	0.00137587	AGTR1/APOB/ABCA1/AGT/ALOX15B	5
GO:0010660	regulation of muscle cell apoptotic process	6/320	45/16672	0.000206837	0.00195427	0.00138257	ARRB2/ARRB1/ALOX12/AGT/ADCYAP1/APOH	6
GO:0034754	cellular hormone metabolic process	9/320	107/16672	0.000217972	0.0020543	0.00145334	ASMT/ALDH1A3/AKR1B1/ADM/ALDH1A1/ADH7/AANAT/ADH4/AFP	9
GO:0019915	lipid storage	7/320	64/16672	0.000218608	0.00205513	0.00145392	APOB/ABCA1/APOA1/APOC4/ACACB/PLIN2/APOE	7
GO:0022600	digestive system process	8/320	85/16672	0.000225224	0.00211204	0.00149419	ADRA2A/AQP5/AQP1/APOA4/APOA1/APOA2/ACO1/SERPINA3	8
GO:0009894	regulation of catabolic process	22/320	494/16672	0.00023344	0.00217864	0.0015413	ARNT/APOC1/ANXA2/APAF1/APOC2/ADRA2A/APC/ADAM8/ADRB2/AKT1/ACTN3/APOA4/ADORA1/ABCD2/APOA1/APOC3/AKT2/APOA2/ARAF/ACACB/AADAC/APOE	22
GO:0043271	negative regulation of ion transport	9/320	108/16672	0.00023385	0.00217864	0.0015413	ADRA2A/AGTR2/ABAT/AKT1/ANK3/ADORA1/ACTN2/AKT2/ADCYAP1	9
GO:0072132	mesenchyme morphogenesis	6/320	46/16672	0.000234068	0.00217864	0.0015413	ACVR1/ACTA2/ACTG2/ACTA1/ACVRL1/ACTC1	6
GO:0051341	regulation of oxidoreductase activity	8/320	86/16672	0.00024425	0.00226778	0.00160436	AGTR1/AGTR2/AKT1/AGT/ABL2/ACVR2A/ABL1/APOE	8
GO:0046660	female sex differentiation	9/320	109/16672	0.000250676	0.00232169	0.0016425	ANG/ARRB2/ARRB1/AMHR2/AMH/ADCYAP1/AFP/ACVR1B/ADCYAP1R1	9
GO:0031649	heat generation	4/320	17/16672	0.000260158	0.00239767	0.00169626	ABAT/ADRB2/ADRB1/ADRB3	4
GO:0043651	linoleic acid metabolic process	4/320	17/16672	0.000260158	0.00239767	0.00169626	ALOX12B/ABCD1/ALOX12/ALOX15B	4
GO:0010595	positive regulation of endothelial cell migration	7/320	66/16672	0.000265245	0.0024326	0.00172097	AKT1/RHOB/ANGPT1/ANXA3/ALOX12/AGT/AAMP	7
GO:0042440	pigment metabolic process	7/320	66/16672	0.000265245	0.0024326	0.00172097	APRT/AMBP/ADA/ALAS1/ALAS2/ASIP/ALAD	7
GO:0035023	regulation of Rho protein signal transduction	9/320	110/16672	0.000268494	0.00245639	0.0017378	ABR/ARHGDIA/ADRA1A/ABCA1/ARRB1/APOA1/APOC3/ARHGDIB/APOE	9
GO:0008643	carbohydrate transport	12/320	187/16672	0.000271259	0.00247565	0.00175142	AQP6/AQP5/AQP8/AQP1/AKT1/AQP7/AQP4/AKT2/AQP2/AQP9/AGT/AQP3	12
GO:0032844	regulation of homeostatic process	20/320	433/16672	0.000279805	0.00254744	0.00180222	ARNT/ADCY5/ANXA1/PARP1/ADRA2A/AGTR1/AGTR2/ABAT/ADAM8/ADA/ANK3/ADORA1/ARRB1/ANK2/ALOX12/AGT/ACVR2A/ABL1/ACVR1B/ADCYAP1R1	20
GO:0090207	regulation of triglyceride metabolic process	5/320	31/16672	0.000284674	0.0025855	0.00182914	APOC2/APOA4/APOA1/APOC3/AADAC	5
GO:0071320	cellular response to cAMP	6/320	48/16672	0.000296953	0.00269051	0.00190343	AQP8/AQP1/APP/AQP9/AANAT/APEX1	6
GO:0001676	long-chain fatty acid metabolic process	8/320	89/16672	0.000309371	0.00279626	0.00197825	ALOX12B/ABCD1/ACAA1/ALOX12/ACOX1/ACADL/ALOX15/ALOX15B	8
GO:1901617	organic hydroxy compound biosynthetic process	11/320	163/16672	0.000315546	0.00284522	0.00201288	AKR1B1/ACLY/AGTR2/APOB/APOA4/APOA1/ALOX12/ASIP/ALOX15/ADCYAP1R1/APOE	11
GO:0043410	positive regulation of MAPK cascade	21/320	471/16672	0.000318002	0.0028605	0.00202369	ALOX12B/ADRA1B/ADRA2B/ADRA2A/ARRB2/ADRA1A/ADAM8/ADRB2/ADORA2B/ANGPT1/ADORA1/ARRB1/ADRA2C/ALK/AR/ADRB3/FAS/ADCYAP1/ABL1/ALOX15/AGER	21
GO:0015844	monoamine transport	7/320	68/16672	0.000319567	0.00286085	0.00202394	ADRA2B/ADRA2A/AGTR2/ABAT/GRK2/ADRA2C/AGT	7
GO:1903035	negative regulation of response to wounding	7/320	68/16672	0.000319567	0.00286085	0.00202394	ANXA2/APCS/ABAT/ALOX12/APOH/AGER/APOE	7
GO:0033559	unsaturated fatty acid metabolic process	9/320	113/16672	0.000328353	0.00293251	0.00207463	ALOX12B/ANXA1/ALOX5AP/ALOX5/ABCD1/ALOX12/ACOX1/ALOX15/ALOX15B	9
GO:0010955	negative regulation of protein processing	5/320	32/16672	0.000332137	0.00293831	0.00207874	BIRC3/A2M/BIRC2/XIAP/BIRC5	5
GO:0034694	response to prostaglandin	5/320	32/16672	0.000332137	0.00293831	0.00207874	APOB/AKT1/ACACA/AANAT/ADCY6	5
GO:0050892	intestinal absorption	5/320	32/16672	0.000332137	0.00293831	0.00207874	ADRA2A/APOA4/APOA1/APOA2/ACO1	5
GO:1903318	negative regulation of protein maturation	5/320	32/16672	0.000332137	0.00293831	0.00207874	BIRC3/A2M/BIRC2/XIAP/BIRC5	5
GO:0006875	cellular metal ion homeostasis	21/320	473/16672	0.00033642	0.00296511	0.0020977	ADRA1B/ADCY5/ARF1/AGTR1/AGTR2/ADRA1A/ADM/APP/ANK2/ADRA1D/ACO1/ALAS2/AGT/ABL2/ANXA7/ANXA6/ADCYAP1/ABCB7/ABL1/ADCYAP1R1/APOE	21
GO:0048732	gland development	19/320	406/16672	0.000336747	0.00296511	0.0020977	ARG1/APRT/ANXA1/AK4/AREG/ACAT1/ADA/AKT1/NR0B1/APOA1/AKT2/ARHGAP5/ASCL1/ARF6/ASNS/AR/ADCYAP1/ABL1/ALOX15B	19
GO:0048511	rhythmic process	16/320	310/16672	0.000340307	0.00298945	0.00211491	ANG/ANXA1/ARRB2/ADA/ADORA1/ARRB1/ADCY1/AHR/AMH/AGRP/FAS/AANAT/ADCYAP1/AFP/AHCY/ARNTL	16
GO:0043281	regulation of cysteine-type endopeptidase activity involved in apoptotic process	12/320	192/16672	0.000345282	0.00302605	0.00214081	BIRC3/APAF1/ARRB2/BIRC2/XIAP/AQP1/AKT1/BIRC5/ARRB1/ALOX12/FASLG/FAS	12
GO:0009132	nucleoside diphosphate metabolic process	9/320	114/16672	0.0003506	0.00305837	0.00216368	ARNT/ALDOC/AK4/AK1/AK2/ACTN3/ALDOB/ALDOA/AMPD3	9
GO:0042476	odontogenesis	9/320	114/16672	0.0003506	0.00305837	0.00216368	AMBN/AQP6/ALPL/AQP5/ADM/AQP1/AMELX/ACVR2B/AQP3	9
GO:0046148	pigment biosynthetic process	6/320	50/16672	0.000372376	0.00322582	0.00228214	APRT/ADA/ALAS1/ALAS2/ASIP/ALAD	6
GO:0050819	negative regulation of coagulation	6/320	50/16672	0.000372376	0.00322582	0.00228214	ANXA2/ANXA5/ABAT/ALOX12/APOH/APOE	6
GO:0050885	neuromuscular process controlling balance	6/320	50/16672	0.000372376	0.00322582	0.00228214	ADCY5/ALDH1A3/ABR/APP/AARS/ABL1	6
GO:0042158	lipoprotein biosynthetic process	8/320	92/16672	0.000388015	0.00334585	0.00236706	ALOX12B/APOB/ABCA1/APOA4/APOA1/APOA2/APOBEC1/APOE	8
GO:0046939	nucleotide phosphorylation	8/320	92/16672	0.000388015	0.00334585	0.00236706	ARNT/ALDOC/AK4/AK1/AK2/ACTN3/ALDOB/ALDOA	8
GO:0001701	in utero embryonic development	16/320	314/16672	0.000392026	0.00337268	0.00238604	ARNT/APBA1/ACVR1/ADM/APOB/ADA/AKT1/ADAR/ANGPT1/APBA2/ASCL2/ADAM10/AR/ADD1/ACVRL1/ACVR1B	16
GO:0043393	regulation of protein binding	11/320	168/16672	0.000408562	0.00350408	0.002479	ANXA2/ARRB2/AMFR/ADRB2/APP/ANGPT1/ARRB1/ADD2/ADD1/ABL1/AES	11
GO:0006144	purine nucleobase metabolic process	4/320	19/16672	0.000411035	0.00350408	0.002479	ACPP/APRT/AOX1/ADA	4
GO:0006525	arginine metabolic process	4/320	19/16672	0.000411035	0.00350408	0.002479	ARG1/ART4/ASL/ARG2	4
GO:0090208	positive regulation of triglyceride metabolic process	4/320	19/16672	0.000411035	0.00350408	0.002479	APOC2/APOA4/APOA1/AADAC	4
GO:0009144	purine nucleoside triphosphate metabolic process	14/320	254/16672	0.000412864	0.00351169	0.00248438	ARNT/ALDOC/AK4/PARP1/AK1/ADK/AK2/ADA/ACTN3/ALDOB/ALDOA/ADCYAP1/AMPD3/AMPD2	14
GO:0030073	insulin secretion	12/320	196/16672	0.000416207	0.00353211	0.00249883	SLC25A6/SLC25A5/ADCY5/ANXA1/ADRA2A/ABAT/ARRB1/ADRA2C/SLC25A4/ARL2/ACVR2B/ARNTL	12
GO:1903034	regulation of response to wounding	10/320	143/16672	0.000443195	0.00372389	0.00263451	ANXA2/APCS/ANXA1/ADRA2A/ABAT/ALOX12/ASIC2/APOH/AGER/APOE	10
GO:0010742	macrophage derived foam cell differentiation	5/320	34/16672	0.000444762	0.00372389	0.00263451	AGTR1/APOB/ABCA1/AGT/ALOX15B	5
GO:0010863	positive regulation of phospholipase C activity	5/320	34/16672	0.000444762	0.00372389	0.00263451	ANG/ADRA1A/AGT/ABL2/ADCYAP1R1	5
GO:0090077	foam cell differentiation	5/320	34/16672	0.000444762	0.00372389	0.00263451	AGTR1/APOB/ABCA1/AGT/ALOX15B	5
GO:0097300	programmed necrotic cell death	5/320	34/16672	0.000444762	0.00372389	0.00263451	BIRC3/BIRC2/SLC25A4/FASLG/FAS	5
GO:1903523	negative regulation of blood circulation	5/320	34/16672	0.000444762	0.00372389	0.00263451	AGTR2/ADRA1A/ADM/ADORA1/GRK2	5
GO:0006687	glycosphingolipid metabolic process	7/320	72/16672	0.000454907	0.0037919	0.00268262	ARSD/STS/ARSA/ARSF/ASAH1/ARSE/ARSB	7
GO:1901606	alpha-amino acid catabolic process	7/320	72/16672	0.000454907	0.0037919	0.00268262	ARG1/ASL/AMT/ACAT1/ASPA/AGXT/AHCY	7
GO:0002791	regulation of peptide secretion	12/320	199/16672	0.00047715	0.00396849	0.00280755	SLC25A6/SLC25A5/ADCY5/ADRA2A/ABAT/ADORA1/ARRB1/ADRA2C/SLC25A4/ARL2/ADCYAP1/ARNTL	12
GO:0006091	generation of precursor metabolites and energy	17/320	352/16672	0.000481304	0.00398402	0.00281853	ARNT/ALDOC/ACO2/AKT1/AQP7/ACTN3/ALDOB/ADSL/AKT2/ALDOA/ACADVL/SLC25A4/ACO1/ACOX1/ADRB3/ASIP/AGL	17
GO:0042542	response to hydrogen peroxide	9/320	119/16672	0.000481335	0.00398402	0.00281853	ARG1/ANXA1/AREG/AKR1B1/AQP1/ADA/RHOB/APEX1/ABL1	9
GO:0006805	xenobiotic metabolic process	8/320	95/16672	0.000482203	0.00398402	0.00281853	ACY1/AOC1/NAT2/AHR/NAT1/ALDH3A1/AOC2/AADAC	8
GO:0035812	renal sodium excretion	4/320	20/16672	0.000506073	0.00416289	0.00294508	AGTR1/AGTR2/ADORA1/AGT	4
GO:0035813	regulation of renal sodium excretion	4/320	20/16672	0.000506073	0.00416289	0.00294508	AGTR1/AGTR2/ADORA1/AGT	4
GO:0002090	regulation of receptor internalization	5/320	35/16672	0.000510819	0.00418975	0.00296408	ANXA2/ARF1/ARRB2/ANGPT1/ARRB1	5
GO:0051017	actin filament bundle assembly	9/320	120/16672	0.000511763	0.00418975	0.00296408	ACTN4/ACTN1/ARRB1/ARHGAP6/APOA1/RHOA/ADD2/ADD1/AIF1	9
GO:0010633	negative regulation of epithelial cell migration	6/320	53/16672	0.000512689	0.00418975	0.00296408	ANGPT2/AGTR2/RHOA/ACVRL1/APOH/APOE	6
GO:0044708	single-organism behavior	18/320	387/16672	0.000516482	0.00421157	0.00297952	ADCY3/APRT/ARCN1/ARRB2/ADCY8/AMFR/AGTR2/ABAT/ADA/APP/ADORA1/ADCY1/ARF4/AGRP/ASIC1/ASIP/ADCYAP1/ABL1	18
GO:0090087	regulation of peptide transport	12/320	201/16672	0.000521824	0.0042459	0.00300381	SLC25A6/SLC25A5/ADCY5/ADRA2A/ABAT/ADORA1/ARRB1/ADRA2C/SLC25A4/ARL2/ADCYAP1/ARNTL	12
GO:2000117	negative regulation of cysteine-type endopeptidase activity	8/320	97/16672	0.000554707	0.00450369	0.00318619	BIRC3/ARRB2/BIRC2/XIAP/AQP1/AKT1/BIRC5/ARRB1	8
GO:0001822	kidney development	14/320	262/16672	0.0005622	0.00455467	0.00322225	ANGPT2/AKR1B1/AGTR1/AGTR2/ACTA2/ACAT1/ARL3/ANGPT1/AQP2/JAG1/AGT/ACVR2B/ARG2/AMPD2	14
GO:0006690	icosanoid metabolic process	8/320	98/16672	0.00059413	0.00480294	0.00339789	ALOX12B/ANXA1/ALOX5AP/ALOX5/ALOX12/ACOX1/ALOX15/ALOX15B	8
GO:0043270	positive regulation of ion transport	12/320	204/16672	0.000595406	0.00480294	0.00339789	ACTN4/ARF1/ADRA2A/ARRB2/ABAT/AKT1/ANK3/ADORA1/ACTN2/ANK2/ABL1/ADCYAP1R1	12
GO:0030072	peptide hormone secretion	13/320	234/16672	0.000611884	0.00491428	0.00347666	SLC25A6/SLC25A5/ADCY5/ANXA1/ADRA2A/ABAT/ARRB1/ADRA2C/SLC25A4/ARL2/ACVR2B/ADCYAP1/ARNTL	13
GO:0071241	cellular response to inorganic substance	10/320	149/16672	0.000612516	0.00491428	0.00347666	AOC1/PARP1/ALOX5AP/AQP1/ANK3/ADCY1/AQP2/FAS/ALAD/ALOX15	10
GO:0002021	response to dietary excess	4/320	21/16672	0.000615759	0.00491428	0.00347666	ADRB2/ADRB1/ADRB3/APOE	4
GO:0045822	negative regulation of heart contraction	4/320	21/16672	0.000615759	0.00491428	0.00347666	AGTR2/ADRA1A/ADORA1/GRK2	4
GO:0046688	response to copper ion	4/320	21/16672	0.000615759	0.00491428	0.00347666	AOC1/AQP1/AQP2/AANAT	4
GO:0070301	cellular response to hydrogen peroxide	7/320	76/16672	0.000632491	0.0050371	0.00356355	ARG1/ANXA1/AKR1B1/AQP1/RHOB/APEX1/ABL1	7
GO:0071466	cellular response to xenobiotic stimulus	8/320	99/16672	0.000635787	0.00505262	0.00357453	ACY1/AOC1/NAT2/AHR/NAT1/ALDH3A1/AOC2/AADAC	8
GO:0008277	regulation of G-protein coupled receptor protein signaling pathway	9/320	124/16672	0.000649694	0.00514135	0.0036373	ACPP/ADRA2A/ARRB2/ADM/ADRB2/ADA/ARRB1/GRK2/ADCYAP1	9
GO:0061572	actin filament bundle organization	9/320	124/16672	0.000649694	0.00514135	0.0036373	ACTN4/ACTN1/ARRB1/ARHGAP6/APOA1/RHOA/ADD2/ADD1/AIF1	9
GO:0043112	receptor metabolic process	10/320	152/16672	0.000715388	0.00564746	0.00399536	ANXA2/ARF1/ARRB2/ADM/ANGPT1/ARRB1/GRK2/ACHE/GRK3/APOE	10
GO:0006909	phagocytosis	13/320	238/16672	0.00071666	0.00564746	0.00399536	ACTG1/ANXA1/ABR/ADORA2A/ABCA1/ADORA1/ANXA3/ANXA11/ACTB/AIF1/ABL1/ALOX15/AHSG	13
GO:0010226	response to lithium ion	4/320	22/16672	0.000741299	0.00580504	0.00410683	ADCY1/ASCL1/ACTA1/FAS	4
GO:0010460	positive regulation of heart rate	4/320	22/16672	0.000741299	0.00580504	0.00410683	ADRA1A/ADM/ADA/ADRB1	4
GO:0090181	regulation of cholesterol metabolic process	4/320	22/16672	0.000741299	0.00580504	0.00410683	APOB/ACADVL/ACADL/APOE	4
GO:0045861	negative regulation of proteolysis	15/320	301/16672	0.000743889	0.00581318	0.0041126	BIRC3/AMBP/ARRB2/A2M/BIRC2/XIAP/AQP1/AKT1/APP/BIRC5/ARRB1/APLP2/AGT/SERPINA3/AHSG	15
GO:0061098	positive regulation of protein tyrosine kinase activity	5/320	38/16672	0.00075357	0.00584575	0.00413564	ADRA2B/ADRA2A/ADORA1/ADRA2C/AGT	5
GO:0070169	positive regulation of biomineral tissue development	5/320	38/16672	0.00075357	0.00584575	0.00413564	ACVR1/ADRB2/AMELX/ACVR2B/ACVR2A	5
GO:0002739	regulation of cytokine secretion involved in immune response	3/320	10/16672	0.000760524	0.00584575	0.00413564	ANGPT1/APOA1/APOA2	3
GO:0032429	regulation of phospholipase A2 activity	3/320	10/16672	0.000760524	0.00584575	0.00413564	ANG/ANXA1/AGTR1	3
GO:0040015	negative regulation of multicellular organism growth	3/320	10/16672	0.000760524	0.00584575	0.00413564	ADRB2/ADRB1/ADRB3	3
GO:0046501	protoporphyrinogen IX metabolic process	3/320	10/16672	0.000760524	0.00584575	0.00413564	ALAS1/ALAS2/ALAD	3
GO:0070254	mucus secretion	3/320	10/16672	0.000760524	0.00584575	0.00413564	ALOX12B/ADA/ADORA1	3
GO:1990845	adaptive thermogenesis	3/320	10/16672	0.000760524	0.00584575	0.00413564	ADRB2/ADRB1/ADRB3	3
GO:0045765	regulation of angiogenesis	12/320	210/16672	0.000768908	0.0058981	0.00417268	ANGPT2/ADM/AQP1/RHOB/ANXA3/RHOA/ALOX12/AGT/FASLG/KLK3/ACVRL1/APOH	12
GO:0051186	cofactor metabolic process	17/320	368/16672	0.000791712	0.00606064	0.00428766	ARNT/ALDOC/AMBP/AKR1B1/ACLY/ACAT1/AMD1/ACACA/ACTN3/ALDOB/ALAS1/ALDOA/ALAS2/ADH4/ALAD/ACACB/AHCY	17
GO:0031329	regulation of cellular catabolic process	17/320	370/16672	0.000840503	0.00642104	0.00454263	ARNT/ANXA2/APAF1/APOC2/ADRA2A/ADAM8/ADRB2/AKT1/APOA4/ABCD2/APOA1/APOC3/AKT2/ARAF/ACACB/AADAC/APOE	17
GO:0045137	development of primary sexual characteristics	12/320	213/16672	0.000870393	0.00663586	0.00469461	ANG/ARRB2/NR0B1/ARRB1/AMHR2/AR/AMH/ADCYAP1/ACVR2A/AFP/ACVR1B/ADCYAP1R1	12
GO:0034695	response to prostaglandin E	4/320	23/16672	0.000883901	0.00669801	0.00473858	AKT1/ACACA/AANAT/ADCY6	4
GO:0044062	regulation of excretion	4/320	23/16672	0.000883901	0.00669801	0.00473858	AGTR1/AGTR2/ADORA1/AGT	4
GO:0071379	cellular response to prostaglandin stimulus	4/320	23/16672	0.000883901	0.00669801	0.00473858	APOB/AKT1/ACACA/ADCY6	4
GO:0048608	reproductive structure development	18/320	406/16672	0.000899081	0.0067993	0.00481024	ANG/ARNT/ANXA1/ARRB2/BIRC2/ADM/ADA/AKT1/NR0B1/ARRB1/ASCL2/AMHR2/AR/AMH/ADCYAP1/ACVR2A/AFP/ALOX15B	18
GO:0072001	renal system development	14/320	276/16672	0.000934302	0.00705144	0.00498862	ANGPT2/AKR1B1/AGTR1/AGTR2/ACTA2/ACAT1/ARL3/ANGPT1/AQP2/JAG1/AGT/ACVR2B/ARG2/AMPD2	14
GO:0032924	activin receptor signaling pathway	5/320	40/16672	0.000957445	0.0072116	0.00510192	ACVR1/ACVR2B/ACVR2A/ACVRL1/ACVR1B	5
GO:0009141	nucleoside triphosphate metabolic process	14/320	277/16672	0.000967386	0.00727187	0.00514456	ARNT/ALDOC/AK4/PARP1/AK1/ADK/AK2/ADA/ACTN3/ALDOB/ALDOA/ADCYAP1/AMPD3/AMPD2	14
GO:2000116	regulation of cysteine-type endopeptidase activity	12/320	216/16672	0.00098282	0.00737312	0.00521619	BIRC3/APAF1/ARRB2/BIRC2/XIAP/AQP1/AKT1/BIRC5/ARRB1/ALOX12/FASLG/FAS	12
GO:0032835	glomerulus development	6/320	60/16672	0.000999433	0.00746788	0.00528323	ANGPT2/AGTR2/ACTA2/ANGPT1/JAG1/AMPD2	6
GO:0046889	positive regulation of lipid biosynthetic process	6/320	60/16672	0.000999433	0.00746788	0.00528323	APOC2/ANXA1/AKT1/APOA4/APOA1/APOE	6
GO:0061458	reproductive system development	18/320	410/16672	0.00100499	0.00749447	0.00530204	ANG/ARNT/ANXA1/ARRB2/BIRC2/ADM/ADA/AKT1/NR0B1/ARRB1/ASCL2/AMHR2/AR/AMH/ADCYAP1/ACVR2A/AFP/ALOX15B	18
GO:0002526	acute inflammatory response	9/320	132/16672	0.0010169	0.00756821	0.00535421	APCS/A2M/ACVR1/ADAM8/ADORA1/APOA2/SERPINA3/ADCYAP1/AHSG	9
GO:0051955	regulation of amino acid transport	3/320	11/16672	0.0010309	0.00762705	0.00539584	ARG1/ABAT/AGT	3
GO:0060544	regulation of necroptotic process	3/320	11/16672	0.0010309	0.00762705	0.00539584	BIRC3/BIRC2/SLC25A4	3
GO:0060547	negative regulation of necrotic cell death	3/320	11/16672	0.0010309	0.00762705	0.00539584	BIRC3/BIRC2/SLC25A4	3
GO:0003071	renal system process involved in regulation of systemic arterial blood pressure	4/320	24/16672	0.00104478	0.00766923	0.00542568	AGTR1/AGTR2/ADORA1/AGT	4
GO:0032925	regulation of activin receptor signaling pathway	4/320	24/16672	0.00104478	0.00766923	0.00542568	ACVR1/ACVR2B/ACVR2A/ACVR1B	4
GO:0072661	protein targeting to plasma membrane	4/320	24/16672	0.00104478	0.00766923	0.00542568	ANXA2/ANK1/ANK3/ANK2	4
GO:2000404	regulation of T cell migration	4/320	24/16672	0.00104478	0.00766923	0.00542568	ADAM8/APOD/ADAM10/AIF1	4
GO:0009410	response to xenobiotic stimulus	8/320	107/16672	0.00106097	0.00777284	0.00549898	ACY1/AOC1/NAT2/AHR/NAT1/ALDH3A1/AOC2/AADAC	8
GO:0048872	homeostasis of number of cells	12/320	218/16672	0.00106429	0.00778198	0.00550544	ARNT/ANXA1/ADA/AKT1/ADAR/ALAS2/ADD1/FAS/ACVR2A/ABL1/ACVR1B/AMPD3	12
GO:0045806	negative regulation of endocytosis	5/320	41/16672	0.00107351	0.0078189	0.00553157	APOC1/ANXA2/APOC2/APOC3/ARF6	5
GO:0045933	positive regulation of muscle contraction	5/320	41/16672	0.00107351	0.0078189	0.00553157	ADRA1B/ADRA1A/ABAT/ADA/ADRA1D	5
GO:0007589	body fluid secretion	7/320	84/16672	0.00115043	0.00836288	0.0059164	ALOX12B/APRT/ANXA2/AQP5/AQP1/ADA/ADORA1	7
GO:0050663	cytokine secretion	10/320	162/16672	0.00116618	0.00846099	0.00598581	ANXA1/AGTR2/ABCA1/ANXA4/ANGPT1/APOA1/APOA2/AGT/ABL1/ALOX15B	10
GO:1901605	alpha-amino acid metabolic process	11/320	191/16672	0.00118453	0.00857759	0.0060683	ARG1/ART4/ASL/AMT/ADSS/ACAT1/ASNS/ASPA/ARG2/AGXT/AHCY	11
GO:0051262	protein tetramerization	9/320	135/16672	0.00119183	0.00859719	0.00608217	ANXA2/ASL/ACACA/ADSL/ACHE/ACTN2/ALDOA/ACADL/ACACB	9
GO:0090002	establishment of protein localization to plasma membrane	9/320	135/16672	0.00119183	0.00859719	0.00608217	ANXA2/ANK1/AKT1/ANK3/ACTN2/ANK2/ARF6/AR/RHOG	9
GO:0001935	endothelial cell proliferation	8/320	109/16672	0.00119656	0.00861478	0.00609461	ANG/ARNT/ARG1/AKT1/APOA1/ACVRL1/APOH/APOE	8
GO:0034260	negative regulation of GTPase activity	5/320	42/16672	0.00119969	0.00862074	0.00609883	RHOH/ARRB2/ARRB1/ARL2/ADCYAP1	5
GO:0007202	activation of phospholipase C activity	4/320	25/16672	0.00122516	0.00877015	0.00620453	ANG/ADRA1A/AGT/ADCYAP1R1	4
GO:0032365	intracellular lipid transport	4/320	25/16672	0.00122516	0.00877015	0.00620453	ABCA2/ABCA1/ACACA/ACACB	4
GO:0006809	nitric oxide biosynthetic process	6/320	63/16672	0.00129287	0.00923728	0.00653501	AGTR2/AKT1/ACP5/AGT/ARG2/AIF1	6
GO:0071396	cellular response to lipid	20/320	490/16672	0.00130619	0.00931464	0.00658974	ADCY3/ARG1/ADCY5/ANXA1/PARP1/ARRB2/AGTR2/ABCA1/AQP1/AKT1/NR0B1/ADCY1/ALOX12/ABL2/AR/ADCY2/ADCYAP1/ADCY6/ABL1/ARNTL	20
GO:0002027	regulation of heart rate	7/320	86/16672	0.00132111	0.00938536	0.00663977	AGTR2/ADRA1A/ADM/ADA/ANK2/ADRB1/AGT	7
GO:0006165	nucleoside diphosphate phosphorylation	7/320	86/16672	0.00132111	0.00938536	0.00663977	ARNT/ALDOC/AK4/AK1/ACTN3/ALDOB/ALDOA	7
GO:1903532	positive regulation of secretion by cell	15/320	319/16672	0.00133326	0.00945382	0.0066882	ANG/ARF1/AGTR2/ABAT/ADAM8/AP1G1/ADORA2B/ARRB1/GRK2/ACHE/AGT/ADCYAP1/APBB1/ABL1/ALOX15B	15
GO:0090276	regulation of peptide hormone secretion	11/320	194/16672	0.00134298	0.00946536	0.00669637	SLC25A6/SLC25A5/ADCY5/ADRA2A/ABAT/ARRB1/ADRA2C/SLC25A4/ARL2/ADCYAP1/ARNTL	11
GO:0046034	ATP metabolic process	12/320	224/16672	0.00134308	0.00946536	0.00669637	ARNT/ALDOC/AK4/PARP1/AK1/AK2/ACTN3/ALDOB/ALDOA/ADCYAP1/AMPD3/AMPD2	12
GO:0051592	response to calcium ion	8/320	111/16672	0.00134562	0.00946536	0.00669637	ALOX5AP/ADCY1/AQP3/ANXA7/ANXA11/AANAT/APOBEC1/ALOX15	8
GO:0000050	urea cycle	3/320	12/16672	0.00135508	0.00946536	0.00669637	ARG1/ASL/ARG2	3
GO:0002031	G-protein coupled receptor internalization	3/320	12/16672	0.00135508	0.00946536	0.00669637	ARRB2/ADM/ARRB1	3
GO:0038166	angiotensin-activated signaling pathway	3/320	12/16672	0.00135508	0.00946536	0.00669637	AGTR1/AGTR2/ACTN2	3
GO:0051775	response to redox state	3/320	12/16672	0.00135508	0.00946536	0.00669637	ADH5/ARHGDIB/ARNTL	3
GO:1904181	positive regulation of membrane depolarization	3/320	12/16672	0.00135508	0.00946536	0.00669637	PARP1/ANK3/ALOX12	3
GO:0009896	positive regulation of catabolic process	15/320	320/16672	0.00137512	0.00958747	0.00678276	ARNT/APOC2/ADRA2A/APC/ADAM8/ADRB2/AKT1/ACTN3/APOA4/ABCD2/APOA1/AKT2/APOA2/AADAC/APOE	15
GO:0061097	regulation of protein tyrosine kinase activity	6/320	64/16672	0.00140401	0.00977073	0.00691241	ADRA2B/ADRA2A/APP/ADORA1/ADRA2C/AGT	6
GO:0048013	ephrin receptor signaling pathway	7/320	87/16672	0.00141355	0.00981896	0.00694653	ACTG1/AP2A2/RHOA/ADAM10/AP2A1/ACTB/AP2B1	7
GO:0032148	activation of protein kinase B activity	4/320	26/16672	0.00142623	0.00988873	0.00699589	ANG/ADRA2B/ADRA2A/ADRA2C	4
GO:0051260	protein homooligomerization	13/320	258/16672	0.00149487	0.0103455	0.00731902	ARG1/APAF1/ALOX5AP/ACAT1/ACACA/ACTN2/ALDOA/ANXA6/FAS/ASIC1/ALAD/ACADL/ACACB	13
GO:0050818	regulation of coagulation	7/320	88/16672	0.00151097	0.0104377	0.00738425	ANXA2/ANXA5/ABAT/ALOX12/ASIC2/APOH/APOE	7
GO:0050796	regulation of insulin secretion	10/320	168/16672	0.00153316	0.0105715	0.00747891	SLC25A6/SLC25A5/ADCY5/ADRA2A/ABAT/ARRB1/ADRA2C/SLC25A4/ARL2/ARNTL	10
GO:0009895	negative regulation of catabolic process	9/320	140/16672	0.0015368	0.0105771	0.00748291	APOC1/ANXA2/ADRA2A/AKT1/ACTN3/ADORA1/APOC3/APOA2/ACACB	9
GO:0030522	intracellular receptor signaling pathway	13/320	260/16672	0.00160137	0.0110014	0.00778304	ACTN4/ARNT/BIRC3/PARP1/ARRB2/BIRC2/XIAP/NR0B1/AHR/AR/ALOX15/ALOX15B/ARNTL	13
GO:0072593	reactive oxygen species metabolic process	12/320	229/16672	0.00161925	0.0111039	0.00785554	AOX1/AGTR1/AGTR2/BIRC2/AKT1/APOA4/ACP5/ALOX12/AGT/ARF4/ARG2/AIF1	12
GO:0050710	negative regulation of cytokine secretion	5/320	45/16672	0.0016442	0.0111867	0.00791415	ANXA1/ANXA4/ANGPT1/APOA1/APOA2	5
GO:0051055	negative regulation of lipid biosynthetic process	5/320	45/16672	0.0016442	0.0111867	0.00791415	APOC1/APOC3/ACADVL/ACADL/APOE	5
GO:0006643	membrane lipid metabolic process	11/320	199/16672	0.0016455	0.0111867	0.00791415	ARSD/STS/ARSA/ALOX12B/ARSF/ALDH3B2/ALDH3B1/ASAH1/ARSE/ARSB/ALDH3A2	11
GO:0032846	positive regulation of homeostatic process	11/320	199/16672	0.0016455	0.0111867	0.00791415	ARNT/ANXA1/AGTR2/ABAT/ADAM8/ARRB1/AGT/ACVR2A/ABL1/ACVR1B/ADCYAP1R1	11
GO:0010656	negative regulation of muscle cell apoptotic process	4/320	27/16672	0.00164923	0.0111867	0.00791415	ARRB2/ALOX12/ADCYAP1/APOH	4
GO:0042454	ribonucleoside catabolic process	4/320	27/16672	0.00164923	0.0111867	0.00791415	ADA/APOBEC1/AHCY/AMPD3	4
GO:0002374	cytokine secretion involved in immune response	3/320	13/16672	0.00173669	0.0116327	0.00822967	ANGPT1/APOA1/APOA2	3
GO:0002674	negative regulation of acute inflammatory response	3/320	13/16672	0.00173669	0.0116327	0.00822967	APCS/ADORA1/ADCYAP1	3
GO:0009437	carnitine metabolic process	3/320	13/16672	0.00173669	0.0116327	0.00822967	ALDH9A1/ACADM/ACADL	3
GO:0033197	response to vitamin E	3/320	13/16672	0.00173669	0.0116327	0.00822967	ARG1/ADA/ALAD	3
GO:0033540	fatty acid beta-oxidation using acyl-CoA oxidase	3/320	13/16672	0.00173669	0.0116327	0.00822967	ABCD1/ACAA1/ACOX1	3
GO:0036109	alpha-linolenic acid metabolic process	3/320	13/16672	0.00173669	0.0116327	0.00822967	ABCD1/ACAA1/ACOX1	3
GO:0072350	tricarboxylic acid metabolic process	3/320	13/16672	0.00173669	0.0116327	0.00822967	ACLY/ACO2/ACO1	3
GO:1901342	regulation of vasculature development	12/320	232/16672	0.00180631	0.0120775	0.00854434	ANGPT2/ADM/AQP1/RHOB/ANXA3/RHOA/ALOX12/AGT/FASLG/KLK3/ACVRL1/APOH	12
GO:0002683	negative regulation of immune system process	16/320	363/16672	0.00181506	0.0120788	0.00854529	AMBP/APCS/ANXA1/ABR/ARRB2/A2M/ADA/ADAR/ANGPT1/ADORA1/APOA1/APOD/APOA2/FAS/ADCYAP1/ALOX15	16
GO:0043900	regulation of multi-organism process	16/320	363/16672	0.00181506	0.0120788	0.00854529	BIRC3/ARF1/APCS/CRISP1/BIRC2/AP1G1/ADA/ADAR/AP2A2/AP1B1/AP2A1/ARHGDIB/ADARB1/ACVR1B/AP2B1/APOE	16
GO:0070265	necrotic cell death	5/320	46/16672	0.00181617	0.0120788	0.00854529	BIRC3/BIRC2/SLC25A4/FASLG/FAS	5
GO:0007043	cell-cell junction assembly	7/320	91/16672	0.00183491	0.0121603	0.00860294	ACTN4/APC/ANK2/RHOA/ARL2/AGT/RHOC	7
GO:0008585	female gonad development	7/320	91/16672	0.00183491	0.0121603	0.00860294	ANG/ARRB2/ARRB1/AMHR2/AMH/ADCYAP1/AFP	7
GO:0002026	regulation of the force of heart contraction	4/320	28/16672	0.00189533	0.0124945	0.00883937	ADRA1A/ADM/GRK2/ADRB1	4
GO:0071868	cellular response to monoamine stimulus	4/320	28/16672	0.00189533	0.0124945	0.00883937	APLP1/APP/ADCY6/ABL1	4
GO:0071870	cellular response to catecholamine stimulus	4/320	28/16672	0.00189533	0.0124945	0.00883937	APLP1/APP/ADCY6/ABL1	4
GO:0046209	nitric oxide metabolic process	6/320	68/16672	0.00192288	0.0126507	0.0089499	AGTR2/AKT1/ACP5/AGT/ARG2/AIF1	6
GO:0001894	tissue homeostasis	11/320	203/16672	0.00192577	0.0126507	0.0089499	ACTG1/AKR1B1/ADAM8/ADRB2/ACACA/ACP5/ABCA4/ALB/ADD1/SERPINA3/ACTB	11
GO:0030195	negative regulation of blood coagulation	5/320	47/16672	0.00200095	0.0130531	0.00923458	ANXA2/ABAT/ALOX12/APOH/APOE	5
GO:0031102	neuron projection regeneration	5/320	47/16672	0.00200095	0.0130531	0.00923458	ADM/APOA4/APOA1/APOD/APOE	5
GO:0070231	T cell apoptotic process	5/320	47/16672	0.00200095	0.0130531	0.00923458	ADAM8/ADA/AKT1/FASLG/FAS	5
GO:1900047	negative regulation of hemostasis	5/320	47/16672	0.00200095	0.0130531	0.00923458	ANXA2/ABAT/ALOX12/APOH/APOE	5
GO:0006941	striated muscle contraction	9/320	146/16672	0.0020521	0.0133636	0.00945423	ADRA1B/ADRA1A/ACTN3/ADORA1/GRK2/ALDOA/ANK2/ARG2/ACTC1	9
GO:0007045	cell-substrate adherens junction assembly	6/320	69/16672	0.00207269	0.013451	0.00951603	ACTN1/ACTN3/ARHGAP6/ACTN2/APOD/ACVRL1	6
GO:0048041	focal adhesion assembly	6/320	69/16672	0.00207269	0.013451	0.00951603	ACTN1/ACTN3/ARHGAP6/ACTN2/APOD/ACVRL1	6
GO:0001936	regulation of endothelial cell proliferation	7/320	93/16672	0.00207912	0.0134694	0.00952909	ANG/ARNT/ARG1/AKT1/ACVRL1/APOH/APOE	7
GO:0010469	regulation of receptor activity	8/320	119/16672	0.00209569	0.0135533	0.00958844	ANXA2/ADRA2B/ADRA2A/APP/ADORA1/ACTN2/ADRA2C/AGER	8
GO:0042168	heme metabolic process	4/320	29/16672	0.00216573	0.0138774	0.00981771	AMBP/ALAS1/ALAS2/ALAD	4
GO:0042572	retinol metabolic process	4/320	29/16672	0.00216573	0.0138774	0.00981771	ALDH1A3/ALDH1A1/ADH7/ADH4	4
GO:0010984	regulation of lipoprotein particle clearance	3/320	14/16672	0.00217909	0.0138774	0.00981771	APOC1/APOC2/APOC3	3
GO:0019627	urea metabolic process	3/320	14/16672	0.00217909	0.0138774	0.00981771	ARG1/ASL/ARG2	3
GO:0030299	intestinal cholesterol absorption	3/320	14/16672	0.00217909	0.0138774	0.00981771	APOA4/APOA1/APOA2	3
GO:0032691	negative regulation of interleukin-1 beta production	3/320	14/16672	0.00217909	0.0138774	0.00981771	ARRB2/ACP5/APOA1	3
GO:0032717	negative regulation of interleukin-8 production	3/320	14/16672	0.00217909	0.0138774	0.00981771	ANXA1/ANXA4/ARRB1	3
GO:0060712	spongiotrophoblast layer development	3/320	14/16672	0.00217909	0.0138774	0.00981771	ADM/AKT1/ASCL2	3
GO:0098856	intestinal lipid absorption	3/320	14/16672	0.00217909	0.0138774	0.00981771	APOA4/APOA1/APOA2	3
GO:0006874	cellular calcium ion homeostasis	16/320	370/16672	0.00219959	0.0139842	0.00989324	ADRA1B/ADCY5/AGTR1/ADRA1A/ADM/APP/ANK2/ADRA1D/AGT/ABL2/ANXA7/ANXA6/ADCYAP1/ABL1/ADCYAP1R1/APOE	16
GO:0002698	negative regulation of immune effector process	7/320	95/16672	0.00234775	0.0149009	0.0105418	ANXA1/ABR/ARRB2/A2M/ANGPT1/APOA1/APOA2	7
GO:2001057	reactive nitrogen species metabolic process	6/320	71/16672	0.00239857	0.0151977	0.0107518	AGTR2/AKT1/ACP5/AGT/ARG2/AIF1	6
GO:0051402	neuron apoptotic process	11/320	209/16672	0.00241804	0.0152952	0.0108208	APAF1/PARP1/ADAM8/APP/ANGPT1/ASCL1/FASLG/FAS/AARS/ABL1/APOE	11
GO:0002262	myeloid cell homeostasis	8/320	122/16672	0.00244947	0.0154679	0.010943	ARNT/ANXA1/ADAR/ALAS2/ADD1/ACVR2A/ACVR1B/AMPD3	8
GO:0010039	response to iron ion	4/320	30/16672	0.00246161	0.0155185	0.0109787	ABAT/ACO1/ALAD/APBB1	4
GO:0022037	metencephalon development	7/320	96/16672	0.00249171	0.0156819	0.0110943	ARCN1/AGTR2/ABAT/ASCL1/AARS/PHOX2A/ABL1	7
GO:0010959	regulation of metal ion transport	14/320	307/16672	0.00253031	0.0158981	0.0112473	ACTN4/ARF1/ADRA2A/ARRB2/ADRB2/AKT1/ANK3/ADORA1/ACTN2/ANK2/AGT/ADCYAP1/ABL1/ADCYAP1R1	14
GO:0016525	negative regulation of angiogenesis	6/320	72/16672	0.00257527	0.0161317	0.0114125	ANGPT2/RHOA/AGT/FASLG/KLK3/APOH	6
GO:0040017	positive regulation of locomotion	17/320	411/16672	0.00257608	0.0161317	0.0114125	ACTN4/ADRA2A/ACVR1/APC/ADAM8/AKT1/RHOB/ANGPT1/AKT2/ANXA3/ALOX12/ADAM10/AGT/AAMP/AIF1/AGER/ACVR1B	17
GO:0006695	cholesterol biosynthetic process	5/320	50/16672	0.00263767	0.0164624	0.0116465	ACLY/APOB/APOA4/APOA1/APOE	5
GO:0071385	cellular response to glucocorticoid stimulus	5/320	50/16672	0.00263767	0.0164624	0.0116465	ARG1/ANXA1/AGTR2/AQP1/ADCYAP1	5
GO:0034390	smooth muscle cell apoptotic process	3/320	15/16672	0.00268542	0.0165674	0.0117208	ARRB2/ARRB1/APOH	3
GO:0034391	regulation of smooth muscle cell apoptotic process	3/320	15/16672	0.00268542	0.0165674	0.0117208	ARRB2/ARRB1/APOH	3
GO:0035930	corticosteroid hormone secretion	3/320	15/16672	0.00268542	0.0165674	0.0117208	AGTR1/AGTR2/AGT	3
GO:0051044	positive regulation of membrane protein ectodomain proteolysis	3/320	15/16672	0.00268542	0.0165674	0.0117208	ADRA2A/ADAM8/APOE	3
GO:0051895	negative regulation of focal adhesion assembly	3/320	15/16672	0.00268542	0.0165674	0.0117208	ARHGAP6/APOD/ACVRL1	3
GO:0061154	endothelial tube morphogenesis	3/320	15/16672	0.00268542	0.0165674	0.0117208	RHOB/RHOA/ACVRL1	3
GO:2000846	regulation of corticosteroid hormone secretion	3/320	15/16672	0.00268542	0.0165674	0.0117208	AGTR1/AGTR2/AGT	3
GO:0043266	regulation of potassium ion transport	6/320	73/16672	0.00276156	0.0170092	0.0120333	ADRA2A/ANK3/ADORA1/ACTN2/ANK2/ADCYAP1	6
GO:0006007	glucose catabolic process	4/320	31/16672	0.00278411	0.0170641	0.0120722	ALDOC/ACTN3/ALDOB/ALDOA	4
GO:0071867	response to monoamine	4/320	31/16672	0.00278411	0.0170641	0.0120722	APLP1/APP/ADCY6/ABL1	4
GO:0071869	response to catecholamine	4/320	31/16672	0.00278411	0.0170641	0.0120722	APLP1/APP/ADCY6/ABL1	4
GO:0007200	phospholipase C-activating G-protein coupled receptor signaling pathway	7/320	98/16672	0.00279992	0.017133	0.0121209	ADRA1B/ADRA2A/AGTR1/ADRA1A/ACTN2/ADRA1D/AGT	7
GO:0072507	divalent inorganic cation homeostasis	17/320	415/16672	0.00284507	0.0173809	0.0122963	ADRA1B/ADCY5/AGTR1/ADRA1A/ADM/APP/ANK3/ANK2/ADRA1D/AGT/ABL2/ANXA7/ANXA6/ADCYAP1/ABL1/ADCYAP1R1/APOE	17
GO:0010812	negative regulation of cell-substrate adhesion	5/320	51/16672	0.00287923	0.0175325	0.0124035	ACTN4/ANGPT2/ARHGAP6/APOD/ACVRL1	5
GO:1902653	secondary alcohol biosynthetic process	5/320	51/16672	0.00287923	0.0175325	0.0124035	ACLY/APOB/APOA4/APOA1/APOE	5
GO:2000181	negative regulation of blood vessel morphogenesis	6/320	74/16672	0.00295776	0.0179815	0.0127212	ANGPT2/RHOA/AGT/FASLG/KLK3/APOH	6
GO:0030282	bone mineralization	7/320	99/16672	0.00296458	0.0179938	0.0127299	ACVR1/ADRB2/ACVR2B/ACVR2A/ASGR2/ALOX15/AHSG	7
GO:0009205	purine ribonucleoside triphosphate metabolic process	12/320	247/16672	0.00302722	0.0183443	0.0129778	ARNT/ALDOC/AK4/PARP1/AK1/AK2/ACTN3/ALDOB/ALDOA/ADCYAP1/AMPD3/AMPD2	12
GO:0055074	calcium ion homeostasis	16/320	383/16672	0.00309446	0.0187215	0.0132447	ADRA1B/ADCY5/AGTR1/ADRA1A/ADM/APP/ANK2/ADRA1D/AGT/ABL2/ANXA7/ANXA6/ADCYAP1/ABL1/ADCYAP1R1/APOE	16
GO:2000249	regulation of actin cytoskeleton reorganization	4/320	32/16672	0.0031344	0.0188838	0.0133595	ARHGDIA/ABL2/ARHGDIB/ABL1	4
GO:0010043	response to zinc ion	5/320	52/16672	0.00313639	0.0188838	0.0133595	ARG1/PARP1/AANAT/ALAD/APOBEC1	5
GO:0045428	regulation of nitric oxide biosynthetic process	5/320	52/16672	0.00313639	0.0188838	0.0133595	AGTR2/AKT1/ACP5/AGT/AIF1	5
GO:0032941	secretion by tissue	6/320	75/16672	0.00316421	0.0190207	0.0134564	ALOX12B/APRT/AQP5/AQP1/ADA/ADORA1	6
GO:0006152	purine nucleoside catabolic process	3/320	16/16672	0.00325852	0.0193397	0.0136821	ADA/AHCY/AMPD3	3
GO:0010544	negative regulation of platelet activation	3/320	16/16672	0.00325852	0.0193397	0.0136821	ABAT/ALOX12/APOE	3
GO:0046130	purine ribonucleoside catabolic process	3/320	16/16672	0.00325852	0.0193397	0.0136821	ADA/AHCY/AMPD3	3
GO:0055070	copper ion homeostasis	3/320	16/16672	0.00325852	0.0193397	0.0136821	ARF1/XIAP/APP	3
GO:0071380	cellular response to prostaglandin E stimulus	3/320	16/16672	0.00325852	0.0193397	0.0136821	AKT1/ACACA/ADCY6	3
GO:0071941	nitrogen cycle metabolic process	3/320	16/16672	0.00325852	0.0193397	0.0136821	ARG1/ASL/ARG2	3
GO:1903392	negative regulation of adherens junction organization	3/320	16/16672	0.00325852	0.0193397	0.0136821	ARHGAP6/APOD/ACVRL1	3
GO:1904385	cellular response to angiotensin	3/320	16/16672	0.00325852	0.0193397	0.0136821	AGTR1/AGTR2/ACTN2	3
GO:0034614	cellular response to reactive oxygen species	8/320	128/16672	0.00329632	0.0195332	0.0138189	ARG1/ANXA1/AKR1B1/AQP1/RHOB/APOA4/APEX1/ABL1	8
GO:0030335	positive regulation of cell migration	16/320	386/16672	0.00333891	0.0197543	0.0139754	ACTN4/ADRA2A/ACVR1/APC/ADAM8/AKT1/RHOB/ANGPT1/AKT2/ANXA3/ALOX12/ADAM10/AGT/AAMP/AIF1/ACVR1B	16
GO:0032956	regulation of actin cytoskeleton organization	13/320	283/16672	0.00334642	0.0197676	0.0139848	ARF1/ARHGDIA/ARHGAP6/APOA1/ACTN2/RHOA/ADD2/ARF6/ABL2/ARHGDIB/ADD1/ABL1/ALOX15	13
GO:0008154	actin polymerization or depolymerization	10/320	187/16672	0.00335273	0.0197737	0.0139891	ANG/ARF1/ARHGAP6/ACTN2/ADD2/ARF6/ADD1/AIF1/ABL1/ALOX15	10
GO:0032970	regulation of actin filament-based process	14/320	317/16672	0.00337581	0.0198786	0.0140633	ARF1/ARHGDIA/ARHGAP6/APOA1/ACTN2/ANK2/RHOA/ADD2/ARF6/ABL2/ARHGDIB/ADD1/ABL1/ALOX15	14
GO:0070167	regulation of biomineral tissue development	6/320	76/16672	0.00338121	0.0198792	0.0140637	ACVR1/ADRB2/AMELX/ACVR2B/ACVR2A/AHSG	6
GO:0019320	hexose catabolic process	5/320	53/16672	0.00340969	0.019984	0.0141379	ALDOC/ACTN3/ALDOB/ALDOA/ALDH1A1	5
GO:0071384	cellular response to corticosteroid stimulus	5/320	53/16672	0.00340969	0.019984	0.0141379	ARG1/ANXA1/AGTR2/AQP1/ADCYAP1	5
GO:0007204	positive regulation of cytosolic calcium ion concentration	12/320	251/16672	0.00344647	0.0201681	0.0142681	ADRA1B/ADCY5/AGTR1/ADRA1A/ADM/ANK2/ADRA1D/AGT/ABL2/ADCYAP1/ABL1/ADCYAP1R1	12
GO:0046578	regulation of Ras protein signal transduction	10/320	188/16672	0.00348256	0.0203475	0.014395	ABR/ARHGDIA/ADRA1A/ABCA1/ARRB1/APOA1/APOC3/ARF6/ARHGDIB/APOE	10
GO:0046165	alcohol biosynthetic process	7/320	102/16672	0.00350328	0.0203701	0.014411	AKR1B1/ACLY/APOB/APOA4/APOA1/ADCYAP1R1/APOE	7
GO:0002686	negative regulation of leukocyte migration	4/320	33/16672	0.00351358	0.0203701	0.014411	ABR/ADA/ADORA1/APOD	4
GO:0043268	positive regulation of potassium ion transport	4/320	33/16672	0.00351358	0.0203701	0.014411	ADRA2A/ADORA1/ACTN2/ANK2	4
GO:0044058	regulation of digestive system process	4/320	33/16672	0.00351358	0.0203701	0.014411	AQP1/APOA4/APOA1/APOA2	4
GO:0098801	regulation of renal system process	4/320	33/16672	0.00351358	0.0203701	0.014411	AGTR1/AGTR2/ADORA1/AGT	4
GO:0050792	regulation of viral process	12/320	252/16672	0.0035583	0.0205975	0.0145719	BIRC3/ARF1/APCS/BIRC2/AP1G1/ADAR/AP2A2/AP1B1/AP2A1/ADARB1/AP2B1/APOE	12
GO:0060840	artery development	6/320	77/16672	0.0036091	0.0208594	0.0147572	APOB/JAG1/ACVR2B/ACVRL1/AP2B1/APOE	6
GO:0002831	regulation of response to biotic stimulus	8/320	130/16672	0.00362405	0.0209136	0.0147955	BIRC3/ARF1/BIRC2/AP1G1/AP2A2/AP1B1/AP2A1/AP2B1	8
GO:0009199	ribonucleoside triphosphate metabolic process	12/320	253/16672	0.00367303	0.0211636	0.0149724	ARNT/ALDOC/AK4/PARP1/AK1/AK2/ACTN3/ALDOB/ALDOA/ADCYAP1/AMPD3/AMPD2	12
GO:0010634	positive regulation of epithelial cell migration	7/320	103/16672	0.00369846	0.0212195	0.015012	AKT1/RHOB/ANGPT1/ANXA3/ALOX12/AGT/AAMP	7
GO:0034101	erythrocyte homeostasis	7/320	103/16672	0.00369846	0.0212195	0.015012	ARNT/ADAR/ALAS2/ADD1/ACVR2A/ACVR1B/AMPD3	7
GO:0001541	ovarian follicle development	5/320	54/16672	0.0036997	0.0212195	0.015012	ANG/ARRB2/ARRB1/AMH/ADCYAP1	5
GO:0071496	cellular response to external stimulus	12/320	254/16672	0.00379073	0.0216659	0.0153278	AOC1/ASGR1/AQP1/AKT1/ADORA2B/AQP2/ALB/AGT/ASNS/FAS/AIF1/AES	12
GO:0030041	actin filament polymerization	9/320	160/16672	0.00379485	0.0216659	0.0153278	ANG/ARF1/ARHGAP6/ADD2/ARF6/ADD1/AIF1/ABL1/ALOX15	9
GO:0031099	regeneration	9/320	160/16672	0.00379485	0.0216659	0.0153278	ANGPT2/ANXA1/ADM/APOA4/APOA1/APOD/ANXA3/APOA2/APOE	9
GO:0006577	amino-acid betaine metabolic process	3/320	17/16672	0.00390102	0.0222088	0.0157119	ALDH9A1/ACADM/ACADL	3
GO:0042698	ovulation cycle	7/320	104/16672	0.00390179	0.0222088	0.0157119	ANG/ANXA1/ARRB2/ARRB1/AMH/ADCYAP1/AFP	7
GO:0006084	acetyl-CoA metabolic process	4/320	34/16672	0.00392275	0.0222269	0.0157247	ACLY/ACAT1/ACACA/ACACB	4
GO:0030501	positive regulation of bone mineralization	4/320	34/16672	0.00392275	0.0222269	0.0157247	ACVR1/ADRB2/ACVR2B/ACVR2A	4
GO:0045823	positive regulation of heart contraction	4/320	34/16672	0.00392275	0.0222269	0.0157247	ADRA1A/ADM/ADA/ADRB1	4
GO:0043297	apical junction assembly	5/320	55/16672	0.00400697	0.0226699	0.0160381	ACTN4/APC/RHOA/ARL2/RHOC	5
GO:0006942	regulation of striated muscle contraction	6/320	79/16672	0.00409885	0.02312	0.0163565	ADRA1B/ADRA1A/ACTN3/ADORA1/GRK2/ANK2	6
GO:0034333	adherens junction assembly	6/320	79/16672	0.00409885	0.02312	0.0163565	ACTN1/ACTN3/ARHGAP6/ACTN2/APOD/ACVRL1	6
GO:0051098	regulation of binding	13/320	290/16672	0.00411184	0.023133	0.0163657	ANXA2/PARP1/ARRB2/AMFR/ADRB2/APP/ANGPT1/ARRB1/ADD2/ADD1/ABL1/AGER/AES	13
GO:0045807	positive regulation of endocytosis	7/320	105/16672	0.00411349	0.023133	0.0163657	ACTN4/ARF1/ABR/ARRB2/ANGPT1/ARRB1/AHSG	7
GO:0072503	cellular divalent inorganic cation homeostasis	16/320	395/16672	0.00416966	0.0234138	0.0165643	ADRA1B/ADCY5/AGTR1/ADRA1A/ADM/APP/ANK2/ADRA1D/AGT/ABL2/ANXA7/ANXA6/ADCYAP1/ABL1/ADCYAP1R1/APOE	16
GO:2000021	regulation of ion homeostasis	10/320	193/16672	0.00419284	0.0235087	0.0166315	PARP1/AGTR1/AGTR2/ANK3/ADORA1/ANK2/ALOX12/AGT/ABL1/ADCYAP1R1	10
GO:0001503	ossification	15/320	361/16672	0.00432911	0.0242169	0.0171325	AREG/ALPL/ACVR1/ADRB2/AKT1/AMELX/ADAR/ACHE/RHOA/JAG1/ACVR2B/ACVR2A/ASGR2/ALOX15/AHSG	15
GO:0016126	sterol biosynthetic process	5/320	56/16672	0.00433206	0.0242169	0.0171325	ACLY/APOB/APOA4/APOA1/APOE	5
GO:0072006	nephron development	8/320	134/16672	0.00435477	0.0242454	0.0171526	ANGPT2/AGTR2/ACTA2/ACAT1/ANGPT1/JAG1/AGT/AMPD2	8
GO:0070613	regulation of protein processing	6/320	80/16672	0.00436137	0.0242454	0.0171526	BIRC3/A2M/BIRC2/XIAP/ADAM8/BIRC5	6
GO:1901343	negative regulation of vasculature development	6/320	80/16672	0.00436137	0.0242454	0.0171526	ANGPT2/RHOA/AGT/FASLG/KLK3/APOH	6
GO:0010765	positive regulation of sodium ion transport	4/320	35/16672	0.004363	0.0242454	0.0171526	ACTN4/ARF1/AKT1/ANK3	4
GO:0045926	negative regulation of growth	11/320	226/16672	0.00438606	0.0243015	0.0171923	AGTR2/ADRB2/ARHGAP4/ADRB1/AGT/ADRB3/APBB2/APBB1/ACVRL1/ALOX15B/ACVR1B	11
GO:0051607	defense response to virus	11/320	226/16672	0.00438606	0.0243015	0.0171923	BIRC3/ARF1/BIRC2/AP1G1/ADAR/AP2A2/AP1B1/AP2A1/ADARB1/APOBEC1/AP2B1	11
GO:0051604	protein maturation	12/320	260/16672	0.00456229	0.0252406	0.0178567	BIRC3/PARP1/A2M/BIRC2/XIAP/ADAM8/BIRC5/ADAM10/AGT/AGA/APOH/AEBP1	12
GO:2000147	positive regulation of cell motility	16/320	399/16672	0.00458975	0.0252732	0.0178798	ACTN4/ADRA2A/ACVR1/APC/ADAM8/AKT1/RHOB/ANGPT1/AKT2/ANXA3/ALOX12/ADAM10/AGT/AAMP/AIF1/ACVR1B	16
GO:0006925	inflammatory cell apoptotic process	3/320	18/16672	0.00461533	0.0252732	0.0178798	ANXA1/FASLG/FAS	3
GO:0035357	peroxisome proliferator activated receptor signaling pathway	3/320	18/16672	0.00461533	0.0252732	0.0178798	ACTN4/ALOX15/ALOX15B	3
GO:0070207	protein homotrimerization	3/320	18/16672	0.00461533	0.0252732	0.0178798	ARG1/ALOX5AP/ASIC1	3
GO:1902307	positive regulation of sodium ion transmembrane transport	3/320	18/16672	0.00461533	0.0252732	0.0178798	ACTN4/ARF1/ANK3	3
GO:1990776	response to angiotensin	3/320	18/16672	0.00461533	0.0252732	0.0178798	AGTR1/AGTR2/ACTN2	3
GO:2000831	regulation of steroid hormone secretion	3/320	18/16672	0.00461533	0.0252732	0.0178798	AGTR1/AGTR2/AGT	3
GO:0009063	cellular amino acid catabolic process	6/320	81/16672	0.0046361	0.025313	0.0179079	ARG1/ASL/AMT/ABAT/ASPA/AGXT	6
GO:1903317	regulation of protein maturation	6/320	81/16672	0.0046361	0.025313	0.0179079	BIRC3/A2M/BIRC2/XIAP/ADAM8/BIRC5	6
GO:0048660	regulation of smooth muscle cell proliferation	7/320	108/16672	0.004801	0.0261752	0.0185179	ANG/AKR1B1/AKT1/APOD/ALOX12/AGT/AIF1	7
GO:0006778	porphyrin-containing compound metabolic process	4/320	36/16672	0.00483538	0.0262862	0.0185965	AMBP/ALAS1/ALAS2/ALAD	4
GO:0046717	acid secretion	4/320	36/16672	0.00483538	0.0262862	0.0185965	APBA1/ABAT/AQP9/AGXT	4
GO:0022602	ovulation cycle process	6/320	82/16672	0.00492335	0.0267257	0.0189074	ANG/ARRB2/ARRB1/AMH/ADCYAP1/AFP	6
GO:0007548	sex differentiation	12/320	263/16672	0.00499265	0.0270628	0.0191458	ANG/ARRB2/NR0B1/ARRB1/AMHR2/AR/AMH/ADCYAP1/ACVR2A/AFP/ACVR1B/ADCYAP1R1	12
GO:0072659	protein localization to plasma membrane	10/320	198/16672	0.00501294	0.0270951	0.0191687	ANXA2/ANK1/AKT1/ANK3/ACTN2/AKT2/ANK2/ARF6/AR/RHOG	10
GO:0051235	maintenance of location	13/320	297/16672	0.00501307	0.0270951	0.0191687	APOB/ABCA1/AKT1/ANK3/APOA1/ANK2/ALB/ARL2/APOC4/ACACB/ABL1/PLIN2/APOE	13
GO:0032496	response to lipopolysaccharide	13/320	298/16672	0.00515385	0.027816	0.0196787	ARG1/ABR/ALPL/ADM/APOB/ABCA1/AKT1/ACP5/ADH5/FASLG/FAS/ALAD/ABL1	13
GO:0031331	positive regulation of cellular catabolic process	12/320	265/16672	0.00529713	0.0284975	0.0201609	ARNT/APOC2/ADRA2A/ADAM8/ADRB2/AKT1/APOA4/ABCD2/APOA1/AKT2/AADAC/APOE	12
GO:0003158	endothelium development	7/320	110/16672	0.00530519	0.0284975	0.0201609	ACVR1/RHOB/RHOA/ALOX12/JAG1/ACVR2B/ACVRL1	7
GO:0048659	smooth muscle cell proliferation	7/320	110/16672	0.00530519	0.0284975	0.0201609	ANG/AKR1B1/AKT1/APOD/ALOX12/AGT/AIF1	7
GO:0006734	NADH metabolic process	4/320	37/16672	0.00534091	0.0284975	0.0201609	ALDOC/ACTN3/ALDOB/ALDOA	4
GO:0007618	mating	4/320	37/16672	0.00534091	0.0284975	0.0201609	ABAT/ADA/APP/ACVR2A	4
GO:0009112	nucleobase metabolic process	4/320	37/16672	0.00534091	0.0284975	0.0201609	ACPP/APRT/AOX1/ADA	4
GO:0009164	nucleoside catabolic process	4/320	37/16672	0.00534091	0.0284975	0.0201609	ADA/APOBEC1/AHCY/AMPD3	4
GO:0072678	T cell migration	4/320	37/16672	0.00534091	0.0284975	0.0201609	ADAM8/APOD/ADAM10/AIF1	4
GO:0007620	copulation	3/320	19/16672	0.00540364	0.0287504	0.0203398	ABAT/ADA/ACVR2A	3
GO:0034104	negative regulation of tissue remodeling	3/320	19/16672	0.00540364	0.0287504	0.0203398	ABR/AGT/AGER	3
GO:0046365	monosaccharide catabolic process	5/320	59/16672	0.00541974	0.0287657	0.0203506	ALDOC/ACTN3/ALDOB/ALDOA/ALDH1A1	5
GO:0035264	multicellular organism growth	8/320	139/16672	0.00542184	0.0287657	0.0203506	APBA1/ADRB2/APP/APBA2/ADRB1/AR/ADD1/ADRB3	8
GO:0016485	protein processing	11/320	233/16672	0.00549755	0.0291262	0.0206056	BIRC3/PARP1/A2M/BIRC2/XIAP/ADAM8/BIRC5/ADAM10/AGT/APOH/AEBP1	11
GO:0030193	regulation of blood coagulation	6/320	84/16672	0.00553678	0.0291692	0.020636	ANXA2/ABAT/ALOX12/ASIC2/APOH/APOE	6
GO:0033273	response to vitamin	6/320	84/16672	0.00553678	0.0291692	0.020636	ARG1/ALPL/ADA/ASCL1/AQP3/ALAD	6
GO:1900046	regulation of hemostasis	6/320	84/16672	0.00553678	0.0291692	0.020636	ANXA2/ABAT/ALOX12/ASIC2/APOH/APOE	6
GO:1903409	reactive oxygen species biosynthetic process	6/320	84/16672	0.00553678	0.0291692	0.020636	AGTR2/AKT1/ACP5/AGT/ARG2/AIF1	6
GO:0016049	cell growth	18/320	481/16672	0.00556183	0.0292217	0.0206732	ALCAM/AGTR1/AGTR2/ADRA1A/AKT1/APP/ARHGAP4/ALOX12/ADAM10/AGT/ACTA1/AR/APBB2/APBB1/ACVRL1/ABL1/ACVR1B/APOE	18
GO:0001649	osteoblast differentiation	10/320	201/16672	0.00556232	0.0292217	0.0206732	AREG/ALPL/ACVR1/AKT1/AMELX/ADAR/ACHE/JAG1/ACVR2B/ACVR2A	10
GO:0031589	cell-substrate adhesion	13/320	301/16672	0.00559534	0.029354	0.0207668	ACTN4/ANGPT2/ACTN1/ACTN3/ANGPT1/ARHGAP6/APOA1/ACTN2/APOD/ARL2/ACVRL1/ABL1/ALOX15	13
GO:0051272	positive regulation of cellular component movement	16/320	409/16672	0.00579311	0.0303491	0.0214708	ACTN4/ADRA2A/ACVR1/APC/ADAM8/AKT1/RHOB/ANGPT1/AKT2/ANXA3/ALOX12/ADAM10/AGT/AAMP/AIF1/ACVR1B	16
GO:0048678	response to axon injury	5/320	60/16672	0.00582159	0.0304558	0.0215463	ARG1/APOA1/APOD/ARF4/AIF1	5
GO:0007044	cell-substrate junction assembly	6/320	85/16672	0.00586361	0.0306329	0.0216716	ACTN1/ACTN3/ARHGAP6/ACTN2/APOD/ACVRL1	6
GO:2000401	regulation of lymphocyte migration	4/320	38/16672	0.0058806	0.0306789	0.0217041	ADAM8/APOD/ADAM10/AIF1	4
GO:0009615	response to virus	13/320	304/16672	0.00606661	0.0316053	0.0223595	BIRC3/ARF1/BIRC2/ACTA2/APOB/AP1G1/ADAR/AP2A2/AP1B1/AP2A1/ADARB1/APOBEC1/AP2B1	13
GO:0050707	regulation of cytokine secretion	8/320	142/16672	0.00615151	0.0320032	0.022641	ANXA1/AGTR2/ANXA4/ANGPT1/APOA1/APOA2/ABL1/ALOX15B	8
GO:0031532	actin cytoskeleton reorganization	6/320	86/16672	0.0062043	0.0321627	0.0227539	ANXA1/ARHGDIA/RHOA/ABL2/ARHGDIB/ABL1	6
GO:0033143	regulation of intracellular steroid hormone receptor signaling pathway	5/320	61/16672	0.00624398	0.0321627	0.0227539	PARP1/ARRB2/NR0B1/AR/ARNTL	5
GO:0055006	cardiac cell development	5/320	61/16672	0.00624398	0.0321627	0.0227539	AGTR2/ACTN2/JAG1/AGT/ACTC1	5
GO:0003159	morphogenesis of an endothelium	3/320	20/16672	0.00626792	0.0321627	0.0227539	RHOB/RHOA/ACVRL1	3
GO:0006783	heme biosynthetic process	3/320	20/16672	0.00626792	0.0321627	0.0227539	ALAS1/ALAS2/ALAD	3
GO:0032692	negative regulation of interleukin-1 production	3/320	20/16672	0.00626792	0.0321627	0.0227539	ARRB2/ACP5/APOA1	3
GO:0035929	steroid hormone secretion	3/320	20/16672	0.00626792	0.0321627	0.0227539	AGTR1/AGTR2/AGT	3
GO:0060004	reflex	3/320	20/16672	0.00626792	0.0321627	0.0227539	ALDH1A3/ADRA1A/ASCL1	3
GO:1901889	negative regulation of cell junction assembly	3/320	20/16672	0.00626792	0.0321627	0.0227539	ARHGAP6/APOD/ACVRL1	3
GO:2000406	positive regulation of T cell migration	3/320	20/16672	0.00626792	0.0321627	0.0227539	ADAM8/ADAM10/AIF1	3
GO:0006509	membrane protein ectodomain proteolysis	4/320	39/16672	0.00645541	0.0329894	0.0233387	ADRA2A/ADAM8/ADAM10/APOE	4
GO:0030049	muscle filament sliding	4/320	39/16672	0.00645541	0.0329894	0.0233387	ACTN3/ACTN2/ACTA1/ACTC1	4
GO:0033275	actin-myosin filament sliding	4/320	39/16672	0.00645541	0.0329894	0.0233387	ACTN3/ACTN2/ACTA1/ACTC1	4
GO:0048193	Golgi vesicle transport	13/320	307/16672	0.00656903	0.0335244	0.0237172	ARL1/ANK1/ARF1/ARCN1/AREG/AP1G1/ARL3/ANK3/ARF5/ANK2/AP2A1/ARF3/ARF4	13
GO:0050714	positive regulation of protein secretion	10/320	206/16672	0.00658145	0.0335421	0.0237297	ANG/ARF1/AGTR2/ABAT/ADAM8/ARRB1/ACHE/APBB1/ABL1/ALOX15B	10
GO:0051480	regulation of cytosolic calcium ion concentration	12/320	273/16672	0.0066661	0.0339275	0.0240023	ADRA1B/ADCY5/AGTR1/ADRA1A/ADM/ANK2/ADRA1D/AGT/ABL2/ADCYAP1/ABL1/ADCYAP1R1	12
GO:0051289	protein homotetramerization	5/320	62/16672	0.00668743	0.0339899	0.0240465	ACACA/ACTN2/ALDOA/ACADL/ACACB	5
GO:1905330	regulation of morphogenesis of an epithelium	9/320	175/16672	0.00677076	0.0343669	0.0243132	ARRB2/AGTR2/AP2A2/RHOA/AGT/AP2A1/AR/ABL1/AP2B1	9
GO:0043903	regulation of symbiosis, encompassing mutualism through parasitism	12/320	274/16672	0.00685522	0.0347486	0.0245832	BIRC3/ARF1/APCS/BIRC2/AP1G1/ADAR/AP2A2/AP1B1/AP2A1/ADARB1/AP2B1/APOE	12
GO:0055001	muscle cell development	8/320	145/16672	0.00695349	0.0351991	0.024902	ACTG1/AGTR2/ADM/ACTN2/ANK2/AGT/ACTA1/ACTC1	8
GO:0008406	gonad development	10/320	208/16672	0.0070275	0.0355258	0.0251331	ANG/ARRB2/NR0B1/ARRB1/AMHR2/AR/AMH/ADCYAP1/ACVR2A/AFP	10
GO:0006664	glycolipid metabolic process	7/320	116/16672	0.00705724	0.0355304	0.0251363	ARSD/STS/ARSA/ARSF/ASAH1/ARSE/ARSB	7
GO:0044273	sulfur compound catabolic process	4/320	40/16672	0.00706629	0.0355304	0.0251363	ACAT1/ACAN/ARSB/AHCY	4
GO:0045429	positive regulation of nitric oxide biosynthetic process	4/320	40/16672	0.00706629	0.0355304	0.0251363	AGTR2/AKT1/AGT/AIF1	4
GO:1904407	positive regulation of nitric oxide metabolic process	4/320	40/16672	0.00706629	0.0355304	0.0251363	AGTR2/AKT1/AGT/AIF1	4
GO:0042446	hormone biosynthetic process	5/320	63/16672	0.00715248	0.035868	0.0253752	ARNT/ASMT/AKR1B1/ADM/AANAT	5
GO:0010884	positive regulation of lipid storage	3/320	21/16672	0.00720994	0.035868	0.0253752	APOB/APOC4/ACACB	3
GO:0030325	adrenal gland development	3/320	21/16672	0.00720994	0.035868	0.0253752	NR0B1/APOA1/ASCL1	3
GO:0042401	cellular biogenic amine biosynthetic process	3/320	21/16672	0.00720994	0.035868	0.0253752	ASMT/AMD1/AANAT	3
GO:0051000	positive regulation of nitric-oxide synthase activity	3/320	21/16672	0.00720994	0.035868	0.0253752	AGTR2/AKT1/APOE	3
GO:0051043	regulation of membrane protein ectodomain proteolysis	3/320	21/16672	0.00720994	0.035868	0.0253752	ADRA2A/ADAM8/APOE	3
GO:0051882	mitochondrial depolarization	3/320	21/16672	0.00720994	0.035868	0.0253752	PARP1/ALOX12/ABL1	3
GO:0051954	positive regulation of amine transport	3/320	21/16672	0.00720994	0.035868	0.0253752	ABAT/GRK2/AGT	3
GO:0016052	carbohydrate catabolic process	8/320	146/16672	0.00723763	0.0359581	0.0254389	ARNT/AMY2A/ALDOC/ACTN3/ALDOB/ALDOA/ALDH1A1/AGL	8
GO:0002237	response to molecule of bacterial origin	13/320	311/16672	0.00728982	0.0361695	0.0255885	ARG1/ABR/ALPL/ADM/APOB/ABCA1/AKT1/ACP5/ADH5/FASLG/FAS/ALAD/ABL1	13
GO:0002685	regulation of leukocyte migration	8/320	147/16672	0.00753044	0.0372647	0.0263633	ANXA1/ABR/ADAM8/ADA/ADORA1/APOD/ADAM10/AIF1	8
GO:2000377	regulation of reactive oxygen species metabolic process	8/320	147/16672	0.00753044	0.0372647	0.0263633	AGTR1/AGTR2/BIRC2/AKT1/ACP5/AGT/ARF4/AIF1	8
GO:0008652	cellular amino acid biosynthetic process	5/320	64/16672	0.00763964	0.0377056	0.0266752	ASL/ABAT/ASNS/ASPA/AGXT	5
GO:0048857	neural nucleus development	5/320	64/16672	0.00763964	0.0377056	0.0266752	ALDH1A3/ASCL1/RHOA/ACTB/PHOX2A	5
GO:0009409	response to cold	4/320	41/16672	0.00771416	0.0379869	0.0268742	ADM/ADRB2/ADRB1/ADRB3	4
GO:0034332	adherens junction organization	7/320	118/16672	0.00772701	0.0379869	0.0268742	ANG/ACTN1/ACTN3/ARHGAP6/ACTN2/APOD/ACVRL1	7
GO:1903509	liposaccharide metabolic process	7/320	118/16672	0.00772701	0.0379869	0.0268742	ARSD/STS/ARSA/ARSF/ASAH1/ARSE/ARSB	7
GO:1990778	protein localization to cell periphery	10/320	211/16672	0.00774008	0.0380014	0.0268845	ANXA2/ANK1/AKT1/ANK3/ACTN2/AKT2/ANK2/ARF6/AR/RHOG	10
GO:1904951	positive regulation of establishment of protein localization	18/320	498/16672	0.00785259	0.0385033	0.0272396	ANG/ARF1/PARP1/AGTR2/ABAT/ADAM8/AKT1/ANK3/ACTL6A/ARRB1/ACHE/AKT2/RHOA/ARF6/RHOG/APBB1/ABL1/ALOX15B	18
GO:2000027	regulation of organ morphogenesis	11/320	245/16672	0.00790916	0.0387301	0.0274	ARRB2/ACVR1/AGTR2/AMELX/AP2A2/RHOA/AGT/AP2A1/AR/ABL1/AP2B1	11
GO:0001818	negative regulation of cytokine production	10/320	212/16672	0.0079896	0.039073	0.0276426	ANXA1/ARRB2/ANXA4/ANGPT1/ARRB1/ACP5/APOA1/APOD/APOA2/AGER	10
GO:0034766	negative regulation of ion transmembrane transport	5/320	65/16672	0.00814942	0.0397509	0.0281222	ADRA2A/AKT1/ANK3/ACTN2/AKT2	5
GO:1903426	regulation of reactive oxygen species biosynthetic process	5/320	65/16672	0.00814942	0.0397509	0.0281222	AGTR2/AKT1/ACP5/AGT/AIF1	5
GO:0002092	positive regulation of receptor internalization	3/320	22/16672	0.00823131	0.0399426	0.0282578	ARRB2/ANGPT1/ARRB1	3
GO:0002719	negative regulation of cytokine production involved in immune response	3/320	22/16672	0.00823131	0.0399426	0.0282578	ANGPT1/APOA1/APOA2	3
GO:0009309	amine biosynthetic process	3/320	22/16672	0.00823131	0.0399426	0.0282578	ASMT/AMD1/AANAT	3
GO:0072012	glomerulus vasculature development	3/320	22/16672	0.00823131	0.0399426	0.0282578	ANGPT2/ACTA2/ANGPT1	3
GO:0010883	regulation of lipid storage	4/320	42/16672	0.0083999	0.040708	0.0287993	APOB/ABCA1/APOC4/ACACB	4
GO:0045766	positive regulation of angiogenesis	7/320	120/16672	0.0084426	0.0408622	0.0289084	ANGPT2/ADM/AQP1/RHOB/ANXA3/ALOX12/ACVRL1	7
GO:0070997	neuron death	12/320	282/16672	0.00852512	0.0412084	0.0291533	APAF1/PARP1/ADAM8/AKT1/APP/ANGPT1/ASCL1/FASLG/FAS/AARS/ABL1/APOE	12
GO:0019886	antigen processing and presentation of exogenous peptide antigen via MHC class II	6/320	92/16672	0.00855768	0.0413126	0.029227	ARF1/AP1G1/AP2A2/AP1B1/AP2A1/AP2B1	6
GO:0045913	positive regulation of carbohydrate metabolic process	5/320	66/16672	0.00868232	0.0418604	0.0296146	ARNT/AKT1/ACTN3/AKT2/ADCYAP1R1	5
GO:0006694	steroid biosynthetic process	8/320	151/16672	0.00879166	0.0423331	0.029949	AKR1B1/ACLY/ADM/APOB/NR0B1/APOA4/APOA1/APOE	8
GO:0060047	heart contraction	11/320	249/16672	0.00887374	0.0426736	0.0301899	ADRA1B/AGTR2/ADRA1A/ADM/ADA/ADORA1/GRK2/ANK2/ADRB1/AGT/ACTC1	11
GO:0060249	anatomical structure homeostasis	14/320	355/16672	0.00892232	0.0428523	0.0303163	ACTG1/PARP1/AKR1B1/ADAM8/ADRB2/ACACA/ACP5/ALDOA/ABCA4/ALB/ADD1/SERPINA3/APEX1/ACTB	14
GO:1901658	glycosyl compound catabolic process	4/320	43/16672	0.00912435	0.0437665	0.0309631	ADA/APOBEC1/AHCY/AMPD3	4
GO:0001889	liver development	7/320	122/16672	0.00920579	0.0440902	0.0311921	ARG1/ANXA1/AK4/ACAT1/ADA/ARF6/ASNS	7
GO:0001938	positive regulation of endothelial cell proliferation	5/320	67/16672	0.00923885	0.0440902	0.0311921	ANG/ARNT/ARG1/AKT1/ACVRL1	5
GO:0006096	glycolytic process	5/320	67/16672	0.00923885	0.0440902	0.0311921	ARNT/ALDOC/ACTN3/ALDOB/ALDOA	5
GO:0046470	phosphatidylcholine metabolic process	5/320	67/16672	0.00923885	0.0440902	0.0311921	APOC1/APOA4/ACHE/APOA1/APOA2	5
GO:0003081	regulation of systemic arterial blood pressure by renin-angiotensin	3/320	23/16672	0.00933342	0.044316	0.0313518	AGTR1/AGTR2/AGT	3
GO:0007530	sex determination	3/320	23/16672	0.00933342	0.044316	0.0313518	NR0B1/AR/AMH	3
GO:0034110	regulation of homotypic cell-cell adhesion	3/320	23/16672	0.00933342	0.044316	0.0313518	ABAT/ANK3/ALOX12	3
GO:0045648	positive regulation of erythrocyte differentiation	3/320	23/16672	0.00933342	0.044316	0.0313518	ARNT/ACVR2A/ACVR1B	3
GO:0003015	heart process	11/320	252/16672	0.00965511	0.0457855	0.0323914	ADRA1B/AGTR2/ADRA1A/ADM/ADA/ADORA1/GRK2/ANK2/ADRB1/AGT/ACTC1	11
GO:0006757	ATP generation from ADP	5/320	68/16672	0.00981948	0.0462724	0.0327359	ARNT/ALDOC/ACTN3/ALDOB/ALDOA	5
GO:0014812	muscle cell migration	5/320	68/16672	0.00981948	0.0462724	0.0327359	ANXA1/AGT/AAMP/APEX1/AIF1	5
GO:0030500	regulation of bone mineralization	5/320	68/16672	0.00981948	0.0462724	0.0327359	ACVR1/ADRB2/ACVR2B/ACVR2A/AHSG	5
GO:0032642	regulation of chemokine production	5/320	68/16672	0.00981948	0.0462724	0.0327359	ADORA2B/APOD/ADCYAP1/ALOX15B/AGER	5
GO:0070227	lymphocyte apoptotic process	5/320	68/16672	0.00981948	0.0462724	0.0327359	ADAM8/ADA/AKT1/FASLG/FAS	5
GO:0030218	erythrocyte differentiation	6/320	95/16672	0.00994772	0.0467593	0.0330803	ARNT/ADAR/ALAS2/ADD1/ACVR2A/ACVR1B	6
GO:1904064	positive regulation of cation transmembrane transport	6/320	95/16672	0.00994772	0.0467593	0.0330803	ACTN4/ARF1/ANK3/ACTN2/ANK2/ABL1	6
GO:0031032	actomyosin structure organization	8/320	155/16672	0.0102046	0.0479066	0.033892	ACTG1/ARRB1/ARHGAP6/APOA1/ACTN2/RHOA/ACTA1/ACTC1	8
GO:0006520	cellular amino acid metabolic process	12/320	289/16672	0.0102332	0.047981	0.0339447	ACY1/ARG1/ART4/ASL/AMT/ABAT/ADSS/ASNS/ASPA/ARG2/AARS/AGXT	12
GO:0048661	positive regulation of smooth muscle cell proliferation	5/320	69/16672	0.0104247	0.0485254	0.0343298	AKR1B1/AKT1/ALOX12/AGT/AIF1	5
GO:0061008	hepaticobiliary system development	7/320	125/16672	0.0104437	0.0485254	0.0343298	ARG1/ANXA1/AK4/ACAT1/ADA/ARF6/ASNS	7
GO:0002495	antigen processing and presentation of peptide antigen via MHC class II	6/320	96/16672	0.0104448	0.0485254	0.0343298	ARF1/AP1G1/AP2A2/AP1B1/AP2A1/AP2B1	6
GO:0050905	neuromuscular process	6/320	96/16672	0.0104448	0.0485254	0.0343298	ADCY5/ALDH1A3/ABR/APP/AARS/ABL1	6
GO:0006779	porphyrin-containing compound biosynthetic process	3/320	24/16672	0.0105175	0.0485254	0.0343298	ALAS1/ALAS2/ALAD	3
GO:0007263	nitric oxide mediated signal transduction	3/320	24/16672	0.0105175	0.0485254	0.0343298	AGTR2/AGT/APOE	3
GO:0010939	regulation of necrotic cell death	3/320	24/16672	0.0105175	0.0485254	0.0343298	BIRC3/BIRC2/SLC25A4	3
GO:0042554	superoxide anion generation	3/320	24/16672	0.0105175	0.0485254	0.0343298	ACP5/ALOX12/AGT	3
GO:0061437	renal system vasculature development	3/320	24/16672	0.0105175	0.0485254	0.0343298	ANGPT2/ACTA2/ANGPT1	3
GO:0061440	kidney vasculature development	3/320	24/16672	0.0105175	0.0485254	0.0343298	ANGPT2/ACTA2/ANGPT1	3
GO:0071549	cellular response to dexamethasone stimulus	3/320	24/16672	0.0105175	0.0485254	0.0343298	ARG1/AGTR2/AQP1	3
GO:1900087	positive regulation of G1/S transition of mitotic cell cycle	3/320	24/16672	0.0105175	0.0485254	0.0343298	ANXA1/APEX1/AIF1	3
GO:2000191	regulation of fatty acid transport	3/320	24/16672	0.0105175	0.0485254	0.0343298	AGTR2/AKT1/AKT2	3
GO:0098542	defense response to other organism	17/320	475/16672	0.0105587	0.0486555	0.0344218	ANG/BIRC3/ARF1/BIRC2/ADM/AP1G1/APP/ADAR/AP2A2/ACP5/ANXA3/AP1B1/AP2A1/KLK3/ADARB1/APOBEC1/AP2B1	17
GO:0008016	regulation of heart contraction	10/320	222/16672	0.0108393	0.0498876	0.0352935	ADRA1B/AGTR2/ADRA1A/ADM/ADA/ADORA1/GRK2/ANK2/ADRB1/AGT	10

## Sheet: Sheet4
Enriched GO terms of up-regultd DEGs of SP-MS
ID	Description	GeneRatio	BgRatio	pvalue	p.adjust	qvalue	geneID	Count
GO:0072522	purine-containing compound biosynthetic process	36/327	247/16672	3.16872e-21	1.1927e-17	8.43546e-18	AK4/ADCY3/APRT/AMD1/ADK/ADRB1/ADCY5/ADCYAP1R1/ADORA2B/ADCY1/ADORA2A/AK2/ADA/ADRB3/AMPD3/ADRB2/ADRA2A/ADCY9/ACR/ABCA1/ADCY8/ADSL/ADM/ALDOA/ADCYAP1/AMPD2/APOE/ADCY6/ADCY7/ACAT1/AQP1/AK1/ADSS/APLP1/AMPD1/ADCY2	36
GO:0006164	purine nucleotide biosynthetic process	35/327	236/16672	6.47924e-21	1.21939e-17	8.62421e-18	AK4/ADCY3/APRT/ADK/ADRB1/ADCY5/ADCYAP1R1/ADORA2B/ADCY1/ADORA2A/AK2/ADA/ADRB3/AMPD3/ADRB2/ADRA2A/ADCY9/ACR/ABCA1/ADCY8/ADSL/ADM/ALDOA/ADCYAP1/AMPD2/APOE/ADCY6/ADCY7/ACAT1/AQP1/AK1/ADSS/APLP1/AMPD1/ADCY2	35
GO:0009152	purine ribonucleotide biosynthetic process	34/327	233/16672	4.09492e-20	5.13776e-17	3.6337e-17	AK4/ADCY3/APRT/ADK/ADRB1/ADCY5/ADCYAP1R1/ADORA2B/ADCY1/ADORA2A/AK2/ADRB3/AMPD3/ADRB2/ADRA2A/ADCY9/ACR/ABCA1/ADCY8/ADSL/ADM/ALDOA/ADCYAP1/AMPD2/APOE/ADCY6/ADCY7/ACAT1/AQP1/AK1/ADSS/APLP1/AMPD1/ADCY2	34
GO:0006067	ethanol metabolic process	12/327	14/16672	2.3307e-19	1.79209e-16	1.26746e-16	ADH7/ADH1B/ADH1C/ALDH1B1/ALDH1A1/ALDH2/ADH5/ALDH3B1/ADH1A/ADH6/ALDH3B2/ADH4	12
GO:0009260	ribonucleotide biosynthetic process	34/327	246/16672	2.38056e-19	1.79209e-16	1.26746e-16	AK4/ADCY3/APRT/ADK/ADRB1/ADCY5/ADCYAP1R1/ADORA2B/ADCY1/ADORA2A/AK2/ADRB3/AMPD3/ADRB2/ADRA2A/ADCY9/ACR/ABCA1/ADCY8/ADSL/ADM/ALDOA/ADCYAP1/AMPD2/APOE/ADCY6/ADCY7/ACAT1/AQP1/AK1/ADSS/APLP1/AMPD1/ADCY2	34
GO:0046390	ribose phosphate biosynthetic process	34/327	250/16672	3.99973e-19	2.50916e-16	1.77462e-16	AK4/ADCY3/APRT/ADK/ADRB1/ADCY5/ADCYAP1R1/ADORA2B/ADCY1/ADORA2A/AK2/ADRB3/AMPD3/ADRB2/ADRA2A/ADCY9/ACR/ABCA1/ADCY8/ADSL/ADM/ALDOA/ADCYAP1/AMPD2/APOE/ADCY6/ADCY7/ACAT1/AQP1/AK1/ADSS/APLP1/AMPD1/ADCY2	34
GO:0030104	water homeostasis	20/327	69/16672	1.92578e-18	1.03552e-15	7.32376e-16	ADCY3/ADCY5/ADCY1/ALOX12B/AQP6/AQP8/AQP7/ALOX12/AQP3/ADCY9/AQP2/ADCY8/AQP5/AQP4/AQP9/ADCY6/ANXA7/ADCY7/AQP1/ADCY2	20
GO:0009165	nucleotide biosynthetic process	35/327	297/16672	1.23655e-17	5.81796e-15	4.11478e-15	AK4/ADCY3/APRT/ADK/ADRB1/ADCY5/ADCYAP1R1/ADORA2B/ADCY1/ADORA2A/AK2/ADA/ADRB3/AMPD3/ADRB2/ADRA2A/ADCY9/ACR/ABCA1/ADCY8/ADSL/ADM/ALDOA/ADCYAP1/AMPD2/APOE/ADCY6/ADCY7/ACAT1/AQP1/AK1/ADSS/APLP1/AMPD1/ADCY2	35
GO:1901293	nucleoside phosphate biosynthetic process	35/327	300/16672	1.70503e-17	7.13081e-15	5.0433e-15	AK4/ADCY3/APRT/ADK/ADRB1/ADCY5/ADCYAP1R1/ADORA2B/ADCY1/ADORA2A/AK2/ADA/ADRB3/AMPD3/ADRB2/ADRA2A/ADCY9/ACR/ABCA1/ADCY8/ADSL/ADM/ALDOA/ADCYAP1/AMPD2/APOE/ADCY6/ADCY7/ACAT1/AQP1/AK1/ADSS/APLP1/AMPD1/ADCY2	35
GO:0015850	organic hydroxy compound transport	28/327	197/16672	1.91683e-16	7.21496e-14	5.10281e-14	APOC1/APOA1/APOC2/ALB/APOC3/ABCA2/ABAT/ADRA2B/AGTR1/ADRA2C/AQP6/AQP8/ADRA2A/AQP7/AQP3/APOA4/AQP2/ABCA1/APOB/AQP5/AQP4/AGT/AQP9/APOE/APOA2/AQP1/GRK2/AGTR2	28
GO:0007189	adenylate cyclase-activating G-protein coupled receptor signaling pathway	20/327	88/16672	3.65556e-16	1.2387e-13	8.76075e-14	ADRA1B/ADCY3/ADRA1A/ADRB1/ADCY5/ADORA2B/ADCY1/ADORA2A/ADRA1D/ADRA2B/ADRA2C/ADRB3/ADRB2/ADRA2A/ADCY9/ADCY8/ADCYAP1/ADCY6/ADCY7/ADCY2	20
GO:0003018	vascular process in circulatory system	25/327	155/16672	3.94909e-16	1.2387e-13	8.76075e-14	ADRA1B/ABL1/ADRA1A/ANGPT1/ADRB1/AKT1/ABR/ADORA2B/ADRA1D/ADRA2B/AGTR1/ADRA2C/ADORA1/ADRB3/ADRB2/ADRA2A/ALOX12/ASIC2/AGT/ADM/ADCYAP1/APOE/ADCY6/ACTA2/AGTR2	25
GO:0006069	ethanol oxidation	10/327	12/16672	4.68609e-16	1.3568e-13	9.59605e-14	ADH7/ADH1B/ADH1C/ALDH1B1/ALDH1A1/ALDH2/ADH5/ADH1A/ADH6/ADH4	10
GO:0060191	regulation of lipase activity	19/327	78/16672	5.05958e-16	1.3603e-13	9.62081e-14	ABL1/APOC1/APOA1/ADRA1A/APOC2/APOC3/ADCYAP1R1/AGTR1/RHOA/ANG/ABL2/RHOC/ANXA1/APOA4/APOH/ARL1/AGT/ARF4/APOA2	19
GO:0044282	small molecule catabolic process	35/327	335/16672	5.51234e-16	1.38323e-13	9.78296e-14	ACAT2/ADH7/ACADSB/ASL/ACTN3/AKT1/ABCD1/ABAT/ALDH3A2/ABCD2/AMT/ACADVL/ACOX1/ALDH1B1/ARG1/ALDH1A1/ALDH2/ADH5/AKT2/ALDOB/AHCY/ACADL/ALDOA/ALDH3B1/APOE/AGXT/ASPA/ACADS/ACAA1/ACADM/ACACB/ACAT1/ALDOC/ALDH3B2/ADH4	35
GO:0050880	regulation of blood vessel size	23/327	132/16672	1.07443e-15	2.5276e-13	1.78766e-13	ADRA1B/ABL1/ADRA1A/ADRB1/AKT1/ADORA2B/ADRA1D/ADRA2B/AGTR1/ADRA2C/ADORA1/ADRB3/ADRB2/ADRA2A/ALOX12/ASIC2/AGT/ADM/ADCYAP1/APOE/ADCY6/ACTA2/AGTR2	23
GO:0035150	regulation of tube size	23/327	133/16672	1.27629e-15	2.82587e-13	1.99861e-13	ADRA1B/ABL1/ADRA1A/ADRB1/AKT1/ADORA2B/ADRA1D/ADRA2B/AGTR1/ADRA2C/ADORA1/ADRB3/ADRB2/ADRA2A/ALOX12/ASIC2/AGT/ADM/ADCYAP1/APOE/ADCY6/ACTA2/AGTR2	23
GO:0048871	multicellular organismal homeostasis	34/327	326/16672	1.55831e-15	3.25859e-13	2.30466e-13	ACP5/ADCY3/ALB/ACTB/ADRB1/ADCY5/ACTG1/ABAT/ADCY1/ACADVL/ADAM8/ALOX12B/ADORA1/ADRB3/ACACA/ABCA4/AMPD3/ADRB2/ALOX12/AQP3/ADCY9/AKR1B1/AQP2/ADCY8/ACADL/AQP4/AMPD2/SERPINA3/ADCY6/ACACB/ADCY7/ADD1/AQP1/ADCY2	34
GO:0009992	cellular water homeostasis	10/327	13/16672	1.99552e-15	3.95324e-13	2.79594e-13	AQP6/AQP8/AQP7/AQP3/AQP2/AQP5/AQP4/AQP9/ANXA7/AQP1	10
GO:0090066	regulation of anatomical structure size	40/327	466/16672	3.50421e-15	6.59492e-13	4.66428e-13	ADRA1B/ABL1/ADRA1A/ADRB1/AKT1/ADORA2B/ARF1/ADRA1D/ADRA2B/AGTR1/ACTN2/ADRA2C/ADORA1/ADRB3/ADRB2/AQP6/AQP8/ADRA2A/AQP7/ALOX12/AQP3/ARF6/AQP2/ASIC2/AQP5/ALOX15/AQP4/AGT/ADM/ADCYAP1/AQP9/APOE/ARHGAP4/ADD2/ADCY6/ANXA7/ADD1/AQP1/ACTA2/AGTR2	40
GO:0007190	activation of adenylate cyclase activity	14/327	37/16672	3.84423e-15	6.89032e-13	4.87321e-13	ADCY3/ADRB1/ADCY5/ADORA2B/ADCY1/ADRB3/ADRB2/ADCY9/ACR/ADCY8/ADCYAP1/ADCY6/ADCY7/ADCY2	14
GO:0030819	positive regulation of cAMP biosynthetic process	18/327	76/16672	5.17943e-15	8.59183e-13	6.07661e-13	ADCY3/ADRB1/ADCY5/ADCYAP1R1/ADORA2B/ADCY1/ADORA2A/ADRB3/ADRB2/ADCY9/ACR/ABCA1/ADCY8/ADM/ADCYAP1/ADCY6/ADCY7/ADCY2	18
GO:0045762	positive regulation of adenylate cyclase activity	15/327	46/16672	5.25005e-15	8.59183e-13	6.07661e-13	ADCY3/ADRB1/ADCY5/ADORA2B/ADCY1/ADORA2A/ADRB3/ADRB2/ADCY9/ACR/ADCY8/ADCYAP1/ADCY6/ADCY7/ADCY2	15
GO:0052652	cyclic purine nucleotide metabolic process	23/327	143/16672	6.57898e-15	1.0318e-12	7.29747e-13	ADCY3/ADRB1/ADCY5/ADCYAP1R1/ADORA2B/ADCY1/ADORA2A/ADRB3/ADRB2/ADRA2A/ADCY9/ACR/ABCA1/ADCY8/ADM/ADCYAP1/AMPD2/APOE/ADCY6/ADCY7/AQP1/APLP1/ADCY2	23
GO:0009190	cyclic nucleotide biosynthetic process	23/327	144/16672	7.69213e-15	1.15813e-12	8.19091e-13	ADCY3/ADRB1/ADCY5/ADCYAP1R1/ADORA2B/ADCY1/ADORA2A/ADRB3/ADRB2/ADRA2A/ADCY9/ACR/ABCA1/ADCY8/ADM/ADCYAP1/AMPD2/APOE/ADCY6/ADCY7/AQP1/APLP1/ADCY2	23
GO:0030804	positive regulation of cyclic nucleotide biosynthetic process	19/327	94/16672	2.04472e-14	2.96013e-12	2.09357e-12	ADCY3/ADRB1/ADCY5/ADCYAP1R1/ADORA2B/ADCY1/ADORA2A/ADRB3/ADRB2/ADCY9/ACR/ABCA1/ADCY8/ADM/ADCYAP1/APOE/ADCY6/ADCY7/ADCY2	19
GO:0050878	regulation of body fluid levels	40/327	495/16672	2.63119e-14	3.66748e-12	2.59384e-12	ARRB2/ADCY3/APRT/ACTB/ADCY5/AKT1/SERPINC1/ACTG1/ABAT/ADCY1/ADORA2A/ADA/ADRA2B/ADRA2C/ALOX12B/ADORA1/RHOA/ADRA2A/ARRB1/ALOX12/AQP3/ADCY9/RHOG/ANXA5/AQP2/ASIC2/APOH/ADCY8/A2M/AQP5/AQP4/ANXA2/RHOB/APOE/ADCY6/ANXA7/ADCY7/AQP1/ADCY2/APLNR	40
GO:0030816	positive regulation of cAMP metabolic process	18/327	83/16672	2.7282e-14	3.66748e-12	2.59384e-12	ADCY3/ADRB1/ADCY5/ADCYAP1R1/ADORA2B/ADCY1/ADORA2A/ADRB3/ADRB2/ADCY9/ACR/ABCA1/ADCY8/ADM/ADCYAP1/ADCY6/ADCY7/ADCY2	18
GO:0030817	regulation of cAMP biosynthetic process	20/327	109/16672	2.94582e-14	3.82347e-12	2.70416e-12	ADCY3/ADRB1/ADCY5/ADCYAP1R1/ADORA2B/ADCY1/ADORA2A/ADRB3/ADRB2/ADRA2A/ADCY9/ACR/ABCA1/ADCY8/ADM/ADCYAP1/ADCY6/ADCY7/APLP1/ADCY2	20
GO:0045981	positive regulation of nucleotide metabolic process	21/327	126/16672	4.89018e-14	5.84815e-12	4.13613e-12	ADCY3/ADRB1/ADCY5/ACTN3/ADCYAP1R1/ADORA2B/ADCY1/ADORA2A/ADRB3/ADRB2/ADCY9/ACR/ABCA1/ADCY8/ADM/ADCYAP1/ARNT/APOE/ADCY6/ADCY7/ADCY2	21
GO:1900544	positive regulation of purine nucleotide metabolic process	21/327	126/16672	4.89018e-14	5.84815e-12	4.13613e-12	ADCY3/ADRB1/ADCY5/ACTN3/ADCYAP1R1/ADORA2B/ADCY1/ADORA2A/ADRB3/ADRB2/ADCY9/ACR/ABCA1/ADCY8/ADM/ADCYAP1/ARNT/APOE/ADCY6/ADCY7/ADCY2	21
GO:0006171	cAMP biosynthetic process	20/327	112/16672	5.06944e-14	5.84815e-12	4.13613e-12	ADCY3/ADRB1/ADCY5/ADCYAP1R1/ADORA2B/ADCY1/ADORA2A/ADRB3/ADRB2/ADRA2A/ADCY9/ACR/ABCA1/ADCY8/ADM/ADCYAP1/ADCY6/ADCY7/APLP1/ADCY2	20
GO:0007187	G-protein coupled receptor signaling pathway, coupled to cyclic nucleotide second messenger	25/327	190/16672	5.12723e-14	5.84815e-12	4.13613e-12	ADRA1B/ADCY3/ADRA1A/ADRB1/ADCY5/ADORA2B/ADCY1/ADORA2A/ADRA1D/ADRA2B/ADRA2C/ADORA1/ADRB3/ADRB2/ADRA2A/ADCY9/ANXA1/ADCY8/AGT/ADCYAP1/ADCY6/ADCY7/APLP1/ADCY2/AGTR2	25
GO:0030810	positive regulation of nucleotide biosynthetic process	19/327	99/16672	5.56707e-14	5.98698e-12	4.23432e-12	ADCY3/ADRB1/ADCY5/ADCYAP1R1/ADORA2B/ADCY1/ADORA2A/ADRB3/ADRB2/ADCY9/ACR/ABCA1/ADCY8/ADM/ADCYAP1/APOE/ADCY6/ADCY7/ADCY2	19
GO:1900373	positive regulation of purine nucleotide biosynthetic process	19/327	99/16672	5.56707e-14	5.98698e-12	4.23432e-12	ADCY3/ADRB1/ADCY5/ADCYAP1R1/ADORA2B/ADCY1/ADORA2A/ADRB3/ADRB2/ADCY9/ACR/ABCA1/ADCY8/ADM/ADCYAP1/APOE/ADCY6/ADCY7/ADCY2	19
GO:0034308	primary alcohol metabolic process	14/327	44/16672	6.39374e-14	6.68501e-12	4.728e-12	ADH7/ADH1B/ALDH3A2/ADH1C/ALDH1B1/ALDH1A1/ALDH2/ADH5/ALDH1A3/ALDH3B1/ADH1A/ADH6/ALDH3B2/ADH4	14
GO:0071825	protein-lipid complex subunit organization	13/327	36/16672	7.72381e-14	7.76577e-12	5.49237e-12	APOC1/BIN1/APOA1/APOC2/APOC3/ARF1/AGTR1/APOA4/ABCA1/APOB/AGT/APOE/APOA2	13
GO:0030802	regulation of cyclic nucleotide biosynthetic process	21/327	129/16672	7.93807e-14	7.76577e-12	5.49237e-12	ADCY3/ADRB1/ADCY5/ADCYAP1R1/ADORA2B/ADCY1/ADORA2A/ADRB3/ADRB2/ADRA2A/ADCY9/ACR/ABCA1/ADCY8/ADM/ADCYAP1/APOE/ADCY6/ADCY7/APLP1/ADCY2	21
GO:0015793	glycerol transport	9/327	12/16672	8.04636e-14	7.76577e-12	5.49237e-12	AQP6/AQP8/AQP7/AQP3/AQP2/AQP5/AQP4/AQP9/AQP1	9
GO:0030801	positive regulation of cyclic nucleotide metabolic process	19/327	103/16672	1.18826e-13	1.11815e-11	7.90819e-12	ADCY3/ADRB1/ADCY5/ADCYAP1R1/ADORA2B/ADCY1/ADORA2A/ADRB3/ADRB2/ADCY9/ACR/ABCA1/ADCY8/ADM/ADCYAP1/APOE/ADCY6/ADCY7/ADCY2	19
GO:0009150	purine ribonucleotide metabolic process	39/327	496/16672	1.36865e-13	1.25649e-11	8.88659e-12	AK4/PARP1/ADCY3/APRT/ADK/ADRB1/ADCY5/ACTN3/ADCYAP1R1/ADORA2B/ADCY1/ADORA2A/AK2/ADRB3/AMPD3/ADRB2/ADRA2A/ADCY9/ALDOB/ACR/ABCA1/ADCY8/ADSL/ADM/ALDOA/ADCYAP1/ARNT/AMPD2/APOE/ADCY6/ADCY7/ACAT1/AQP1/AK1/ADSS/ALDOC/APLP1/AMPD1/ADCY2	39
GO:0044242	cellular lipid catabolic process	24/327	183/16672	1.79595e-13	1.60951e-11	1.13833e-11	ACAT2/APOA1/APOC2/ACADSB/APOC3/AADAC/AKT1/ABCD1/ALDH3A2/ABCD2/ACADVL/ACOX1/ADRB2/AKT2/APOA4/APOB/ACADL/APOE/APOA2/ACADS/ACAA1/ACADM/ACACB/ACAT1	24
GO:0045761	regulation of adenylate cyclase activity	16/327	68/16672	1.94538e-13	1.70288e-11	1.20437e-11	ADCY3/ADRB1/ADCY5/ADORA2B/ADCY1/ADORA2A/ADRB3/ADRB2/ADRA2A/ADCY9/ACR/ADCY8/ADCYAP1/ADCY6/ADCY7/ADCY2	16
GO:1900371	regulation of purine nucleotide biosynthetic process	21/327	135/16672	2.01024e-13	1.71967e-11	1.21624e-11	ADCY3/ADRB1/ADCY5/ADCYAP1R1/ADORA2B/ADCY1/ADORA2A/ADRB3/ADRB2/ADRA2A/ADCY9/ACR/ABCA1/ADCY8/ADM/ADCYAP1/APOE/ADCY6/ADCY7/APLP1/ADCY2	21
GO:0030808	regulation of nucleotide biosynthetic process	21/327	136/16672	2.33554e-13	1.95355e-11	1.38166e-11	ADCY3/ADRB1/ADCY5/ADCYAP1R1/ADORA2B/ADCY1/ADORA2A/ADRB3/ADRB2/ADRA2A/ADCY9/ACR/ABCA1/ADCY8/ADM/ADCYAP1/APOE/ADCY6/ADCY7/APLP1/ADCY2	21
GO:0031281	positive regulation of cyclase activity	15/327	59/16672	3.25146e-13	2.60394e-11	1.84165e-11	ADCY3/ADRB1/ADCY5/ADORA2B/ADCY1/ADORA2A/ADRB3/ADRB2/ADCY9/ACR/ADCY8/ADCYAP1/ADCY6/ADCY7/ADCY2	15
GO:0051349	positive regulation of lyase activity	15/327	59/16672	3.25146e-13	2.60394e-11	1.84165e-11	ADCY3/ADRB1/ADCY5/ADORA2B/ADCY1/ADORA2A/ADRB3/ADRB2/ADCY9/ACR/ADCY8/ADCYAP1/ADCY6/ADCY7/ADCY2	15
GO:0030814	regulation of cAMP metabolic process	20/327	125/16672	4.41484e-13	3.46197e-11	2.44849e-11	ADCY3/ADRB1/ADCY5/ADCYAP1R1/ADORA2B/ADCY1/ADORA2A/ADRB3/ADRB2/ADRA2A/ADCY9/ACR/ABCA1/ADCY8/ADM/ADCYAP1/ADCY6/ADCY7/APLP1/ADCY2	20
GO:0071880	adenylate cyclase-activating adrenergic receptor signaling pathway	10/327	19/16672	5.80524e-13	4.45937e-11	3.15391e-11	ADRA1B/ADRA1A/ADRB1/ADRA1D/ADRA2B/ADRA2C/ADRB3/ADRB2/ADRA2A/ADCY9	10
GO:0034440	lipid oxidation	18/327	99/16672	6.91241e-13	5.11971e-11	3.62094e-11	ACAT2/ADH7/ACADSB/AKT1/ABCD1/ALDH3A2/ABCD2/ACADVL/ACOX1/ALOX12/AKT2/ACADL/APOD/ACADS/ACAA1/ACADM/ACACB/ACAT1	18
GO:0033700	phospholipid efflux	9/327	14/16672	7.07293e-13	5.11971e-11	3.62094e-11	APOC1/APOA1/APOC2/APOC3/ABCA2/APOA4/ABCA1/APOE/APOA2	9
GO:0046033	AMP metabolic process	9/327	14/16672	7.07293e-13	5.11971e-11	3.62094e-11	AK4/APRT/ADK/AK2/AMPD3/ADSL/AMPD2/AK1/ADSS	9
GO:0050994	regulation of lipid catabolic process	14/327	52/16672	8.54137e-13	6.06599e-11	4.2902e-11	APOC1/APOA1/APOC2/APOC3/AADAC/AKT1/ABCD2/ADORA1/ADRB2/ADRA2A/AKT2/APOA4/APOA2/ACACB	14
GO:0003091	renal water homeostasis	12/327	34/16672	9.87788e-13	6.76006e-11	4.78108e-11	ADCY3/ADCY5/ADCY1/AQP3/ADCY9/AQP2/ADCY8/AQP4/ADCY6/ADCY7/AQP1/ADCY2	12
GO:0071827	plasma lipoprotein particle organization	12/327	34/16672	9.87788e-13	6.76006e-11	4.78108e-11	APOC1/APOA1/APOC2/APOC3/ARF1/AGTR1/APOA4/ABCA1/APOB/AGT/APOE/APOA2	12
GO:0007188	adenylate cyclase-modulating G-protein coupled receptor signaling pathway	22/327	164/16672	1.18099e-12	7.80926e-11	5.52313e-11	ADRA1B/ADCY3/ADRA1A/ADRB1/ADCY5/ADORA2B/ADCY1/ADORA2A/ADRA1D/ADRA2B/ADRA2C/ADORA1/ADRB3/ADRB2/ADRA2A/ADCY9/ADCY8/ADCYAP1/ADCY6/ADCY7/APLP1/ADCY2	22
GO:1901615	organic hydroxy compound metabolic process	34/327	409/16672	1.18259e-12	7.80926e-11	5.52313e-11	APOC1/APOA1/ADH7/ADH1B/ADCYAP1R1/ASIP/ABAT/ALDH3A2/ADH1C/ACLY/ACADVL/ALDH1B1/ALDH1A1/ALDH2/ALOX12/ADH5/ALDH1A3/AKR1B1/APOA4/ABCA1/APOB/ACADL/ALOX15/APP/APOF/ALDH3B1/APOE/APOA2/AOC2/ADH1A/ADH6/ALDH3B2/ADH4/AGTR2	34
GO:0009187	cyclic nucleotide metabolic process	23/327	183/16672	1.44425e-12	9.37268e-11	6.62887e-11	ADCY3/ADRB1/ADCY5/ADCYAP1R1/ADORA2B/ADCY1/ADORA2A/ADRB3/ADRB2/ADRA2A/ADCY9/ACR/ABCA1/ADCY8/ADM/ADCYAP1/AMPD2/APOE/ADCY6/ADCY7/AQP1/APLP1/ADCY2	23
GO:0030799	regulation of cyclic nucleotide metabolic process	21/327	150/16672	1.67294e-12	1.06728e-10	7.54838e-11	ADCY3/ADRB1/ADCY5/ADCYAP1R1/ADORA2B/ADCY1/ADORA2A/ADRB3/ADRB2/ADRA2A/ADCY9/ACR/ABCA1/ADCY8/ADM/ADCYAP1/APOE/ADCY6/ADCY7/APLP1/ADCY2	21
GO:0006066	alcohol metabolic process	28/327	282/16672	1.84891e-12	1.15988e-10	8.2033e-11	APOC1/APOA1/ADH7/ADH1B/ADCYAP1R1/ALDH3A2/ADH1C/ACLY/ACADVL/ALDH1B1/ALDH1A1/ALDH2/ADH5/ALDH1A3/AKR1B1/APOA4/ABCA1/APOB/ACADL/APP/APOF/ALDH3B1/APOE/APOA2/ADH1A/ADH6/ALDH3B2/ADH4	28
GO:0006884	cell volume homeostasis	11/327	28/16672	2.22973e-12	1.37586e-10	9.7308e-11	AQP6/AQP8/AQP7/AQP3/AQP2/AQP5/AQP4/AQP9/ANXA7/ADD1/AQP1	11
GO:0009991	response to extracellular stimulus	34/327	420/16672	2.49734e-12	1.51613e-10	1.07229e-10	ASNS/APAF1/APOA1/ASS1/ALB/ADRB1/ASGR1/AKT1/SERPINC1/ADORA2B/AES/ADA/ADRB3/ARG1/ADRB2/AQP3/AQP2/ABCA1/AHCY/AOC1/ARSB/AIF1/ADSL/ADM/ADCYAP1/APOE/ALAD/ATF3/ALDH3A1/ASCL1/ACACB/ACTA1/ACAT1/ALPL	34
GO:0003014	renal system process	18/327	108/16672	3.26337e-12	1.94974e-10	1.37896e-10	ADCY3/ADRA1A/ADCY5/ADCY1/AGTR1/ADORA1/AQP3/ADCY9/AQP2/ADCY8/AQP4/AGT/ADCY6/ADCY7/FAS/AQP1/ADCY2/AGTR2	18
GO:0016042	lipid catabolic process	28/327	290/16672	3.6554e-12	2.14983e-10	1.52048e-10	ACAT2/APOC1/APOA1/APOC2/ACADSB/APOC3/AADAC/AKT1/ABCD1/ALDH3A2/ABCD2/ACADVL/ACOX1/ADORA1/ADRB2/ADRA2A/AKT2/APOA4/APOB/ACADL/APOE/APOA2/ACADS/ACAA1/ACADM/ACACB/ACAT1/STS	28
GO:0065005	protein-lipid complex assembly	10/327	22/16672	3.85663e-12	2.23329e-10	1.5795e-10	APOC1/BIN1/APOA1/APOC3/ARF1/APOA4/ABCA1/APOB/APOE/APOA2	10
GO:0006869	lipid transport	29/327	313/16672	4.14525e-12	2.36405e-10	1.67198e-10	APOC1/APOA1/APOC2/ALB/APOC3/ABCA2/AKT1/ABCD1/ABCD2/AGTR1/ACACA/ABCA4/APOC4/AKT2/ANXA1/APOA4/APOH/ABCA1/APOB/ABCA3/AGT/APOF/APOD/AQP9/APOE/APOA2/PLIN2/ACACB/AGTR2	29
GO:0050891	multicellular organismal water homeostasis	14/327	58/16672	4.40474e-12	2.47454e-10	1.75013e-10	ADCY3/ADCY5/ADCY1/ALOX12B/ALOX12/AQP3/ADCY9/AQP2/ADCY8/AQP4/ADCY6/ADCY7/AQP1/ADCY2	14
GO:0046058	cAMP metabolic process	20/327	141/16672	4.47721e-12	2.47827e-10	1.75276e-10	ADCY3/ADRB1/ADCY5/ADCYAP1R1/ADORA2B/ADCY1/ADORA2A/ADRB3/ADRB2/ADRA2A/ADCY9/ACR/ABCA1/ADCY8/ADM/ADCYAP1/ADCY6/ADCY7/APLP1/ADCY2	20
GO:0031279	regulation of cyclase activity	16/327	83/16672	5.24703e-12	2.86229e-10	2.02437e-10	ADCY3/ADRB1/ADCY5/ADORA2B/ADCY1/ADORA2A/ADRB3/ADRB2/ADRA2A/ADCY9/ACR/ADCY8/ADCYAP1/ADCY6/ADCY7/ADCY2	16
GO:0019395	fatty acid oxidation	17/327	97/16672	5.68221e-12	3.05541e-10	2.16095e-10	ACAT2/ADH7/ACADSB/AKT1/ABCD1/ALDH3A2/ABCD2/ACADVL/ACOX1/ALOX12/AKT2/ACADL/ACADS/ACAA1/ACADM/ACACB/ACAT1	17
GO:0051339	regulation of lyase activity	16/327	84/16672	6.3678e-12	3.37583e-10	2.38757e-10	ADCY3/ADRB1/ADCY5/ADORA2B/ADCY1/ADORA2A/ADRB3/ADRB2/ADRA2A/ADCY9/ACR/ADCY8/ADCYAP1/ADCY6/ADCY7/ADCY2	16
GO:0015791	polyol transport	9/327	17/16672	8.15388e-12	4.26267e-10	3.01479e-10	AQP6/AQP8/AQP7/AQP3/AQP2/AQP5/AQP4/AQP9/AQP1	9
GO:1900542	regulation of purine nucleotide metabolic process	23/327	199/16672	8.43719e-12	4.35035e-10	3.07681e-10	ADCY3/ADRB1/ADCY5/ACTN3/ADCYAP1R1/ADORA2B/ADCY1/ADORA2A/ADRB3/ADRB2/ADRA2A/ADCY9/ACR/ABCA1/ADCY8/ADM/ADCYAP1/ARNT/APOE/ADCY6/ADCY7/APLP1/ADCY2	23
GO:0034367	macromolecular complex remodeling	10/327	24/16672	1.12964e-11	5.59468e-10	3.95686e-10	APOC1/APOA1/APOC2/APOC3/AGTR1/APOA4/APOB/AGT/APOE/APOA2	10
GO:0034368	protein-lipid complex remodeling	10/327	24/16672	1.12964e-11	5.59468e-10	3.95686e-10	APOC1/APOA1/APOC2/APOC3/AGTR1/APOA4/APOB/AGT/APOE/APOA2	10
GO:0034369	plasma lipoprotein particle remodeling	10/327	24/16672	1.12964e-11	5.59468e-10	3.95686e-10	APOC1/APOA1/APOC2/APOC3/AGTR1/APOA4/APOB/AGT/APOE/APOA2	10
GO:0060193	positive regulation of lipase activity	14/327	62/16672	1.17663e-11	5.75172e-10	4.06793e-10	APOA1/ADRA1A/APOC2/ADCYAP1R1/AGTR1/RHOA/ANG/ABL2/RHOC/APOA4/APOH/ARL1/AGT/ARF4	14
GO:0006140	regulation of nucleotide metabolic process	23/327	206/16672	1.7295e-11	8.34595e-10	5.90271e-10	ADCY3/ADRB1/ADCY5/ACTN3/ADCYAP1R1/ADORA2B/ADCY1/ADORA2A/ADRB3/ADRB2/ADRA2A/ADCY9/ACR/ABCA1/ADCY8/ADM/ADCYAP1/ARNT/APOE/ADCY6/ADCY7/APLP1/ADCY2	23
GO:0006631	fatty acid metabolic process	30/327	357/16672	2.06461e-11	9.83695e-10	6.95723e-10	ACAT2/APOC1/APOA1/APOC2/ADH7/ACADSB/APOC3/AKT1/ABCD1/ALDH3A2/ABCD2/ACLY/ACADVL/ACOX1/ALOX12B/ALOX5AP/ACACA/ALOX12/ALOX15B/ALOX5/AKT2/ANXA1/APOA4/ACADL/ALOX15/ACADS/ACAA1/ACADM/ACACB/ACAT1	30
GO:0044283	small molecule biosynthetic process	35/327	480/16672	2.26281e-11	1.06397e-09	7.525e-10	APOC1/ASNS/APOA1/APOC2/ASS1/APOC3/ASL/ADCYAP1R1/ABAT/ACLY/ACADVL/ALOX12B/ALOX5AP/ACACA/ALOX12/ALOX15B/ALDH1A3/ALOX5/ANXA1/ALDOB/AKR1B1/APOA4/AHCY/APOB/ACADL/ALOX15/ADM/ALDOA/APOE/ATF3/AGXT/ASPA/ACACB/ACAT1/ALDOC	35
GO:0010035	response to inorganic substance	34/327	455/16672	2.28964e-11	1.06397e-09	7.525e-10	ABL1/PARP1/ACO1/AANAT/ASS1/ABAT/APEX1/ADCY1/ADA/ALOX5AP/ARG1/APBB1/AQP3/ANXA1/ANK3/ANXA11/AKR1B1/APOA4/AQP2/ATF1/AOC1/APOB/ALOX15/APP/RHOB/AQP9/ALAD/ASCL1/AREG/ANXA7/ACTA1/FAS/AQP1/APOBEC1	34
GO:0008015	blood circulation	35/327	484/16672	2.85103e-11	1.30869e-09	9.25579e-10	ADRA1B/ABL1/ADRA1A/ANGPT1/ADRB1/AKT1/ABAT/ABR/ADORA2B/ADORA2A/ADRA1D/AR/ADA/ADRA2B/AGTR1/ADRA2C/ADORA1/ADRB3/ACTC1/ADRB2/ACVRL1/ADRA2A/ALOX12/ADH5/ASIC2/ANK2/ASPH/AGT/ADM/ADCYAP1/APOE/ADCY6/ACTA2/GRK2/AGTR2	35
GO:0071875	adrenergic receptor signaling pathway	10/327	26/16672	2.95466e-11	1.33992e-09	9.47666e-10	ADRA1B/ADRA1A/ADRB1/ADRA1D/ADRA2B/ADRA2C/ADRB3/ADRB2/ADRA2A/ADCY9	10
GO:0055088	lipid homeostasis	18/327	123/16672	3.1507e-11	1.41182e-09	9.98513e-10	ASGR2/APOA1/APOC2/ACADSB/APOC3/ABCA2/ACADVL/ACACA/APOC4/APOA4/ABCA1/APOB/ACADL/AMPD2/APOE/APOA2/ACADS/ACADM	18
GO:0003013	circulatory system process	35/327	488/16672	3.58291e-11	1.5866e-09	1.12213e-09	ADRA1B/ABL1/ADRA1A/ANGPT1/ADRB1/AKT1/ABAT/ABR/ADORA2B/ADORA2A/ADRA1D/AR/ADA/ADRA2B/AGTR1/ADRA2C/ADORA1/ADRB3/ACTC1/ADRB2/ACVRL1/ADRA2A/ALOX12/ADH5/ASIC2/ANK2/ASPH/AGT/ADM/ADCYAP1/APOE/ADCY6/ACTA2/GRK2/AGTR2	35
GO:0010876	lipid localization	29/327	347/16672	5.1809e-11	2.26755e-09	1.60373e-09	APOC1/APOA1/APOC2/ALB/APOC3/ABCA2/AKT1/ABCD1/ABCD2/AGTR1/ACACA/ABCA4/APOC4/AKT2/ANXA1/APOA4/APOH/ABCA1/APOB/ABCA3/AGT/APOF/APOD/AQP9/APOE/APOA2/PLIN2/ACACB/AGTR2	29
GO:0034377	plasma lipoprotein particle assembly	9/327	20/16672	5.34858e-11	2.31403e-09	1.63661e-09	APOC1/APOA1/APOC3/ARF1/APOA4/ABCA1/APOB/APOE/APOA2	9
GO:0030258	lipid modification	25/327	262/16672	7.06261e-11	3.02087e-09	2.13652e-09	ACAT2/APOC1/APOA1/ADH7/ACADSB/AKT1/ABCD1/ALDH3A2/ABCD2/ACADVL/AGTR1/ACOX1/ALOX12/AKT2/APOA4/ACADL/AGT/APOD/APOE/APOA2/ACADS/ACAA1/ACADM/ACACB/ACAT1	25
GO:0006635	fatty acid beta-oxidation	14/327	71/16672	8.30842e-11	3.51381e-09	2.48516e-09	ACAT2/ACADSB/AKT1/ABCD1/ABCD2/ACADVL/ACOX1/AKT2/ACADL/ACADS/ACAA1/ACADM/ACACB/ACAT1	14
GO:0016053	organic acid biosynthetic process	25/327	268/16672	1.14954e-10	4.80763e-09	3.40022e-09	APOC1/ASNS/APOA1/APOC2/ASS1/APOC3/ASL/ABAT/ACLY/ACADVL/ALOX12B/ALOX5AP/ACACA/ALOX12/ALOX15B/ALDH1A3/ALOX5/ANXA1/APOA4/AHCY/ACADL/ALOX15/AGXT/ASPA/ACACB	25
GO:0007266	Rho protein signal transduction	19/327	151/16672	1.30926e-10	5.41543e-09	3.83008e-09	APOA1/ADRA1A/APOC3/ARHGAP6/ARHGDIB/ABR/AGTR1/RHOA/ADRA2A/ARRB1/RHOG/ARHGAP5/ARHGDIA/ABCA1/ARHGDIG/RHOB/APOE/ARHGAP4/ARHGAP1	19
GO:0031960	response to corticosteroid	19/327	152/16672	1.46998e-10	6.01413e-09	4.25352e-09	PARP1/AANAT/ASS1/ARG1/ANXA1/AIF1/ABCA3/ADM/ADCYAP1/ANXA3/ALAD/APOA2/AGXT/ALDH3A1/AREG/FAS/AQP1/ALPL/AGTR2	19
GO:0006833	water transport	9/327	22/16672	1.53013e-10	6.19292e-09	4.37997e-09	AQP6/AQP8/AQP7/AQP3/AQP2/AQP5/AQP4/AQP9/AQP1	9
GO:0009062	fatty acid catabolic process	15/327	89/16672	1.82904e-10	7.32395e-09	5.1799e-09	ACAT2/ACADSB/AKT1/ABCD1/ALDH3A2/ABCD2/ACADVL/ACOX1/AKT2/ACADL/ACADS/ACAA1/ACADM/ACACB/ACAT1	15
GO:0044057	regulation of system process	34/327	492/16672	1.88018e-10	7.44948e-09	5.26867e-09	ADRA1B/ABL1/PARP1/APOA1/ADRA1A/ADRB1/ACTN3/AKT1/ABAT/ADORA2B/ADRA1D/ADA/ADRA2B/AGTR1/ADRA2C/ADORA1/ADRB2/ADRA2A/ALOX12/ANXA6/APOA4/ASIC2/ANK2/AIF1/ASPH/AGT/ADM/ADCYAP1/APOA2/ACPP/ADCY6/AQP1/GRK2/AGTR2	34
GO:0046394	carboxylic acid biosynthetic process	24/327	253/16672	1.93965e-10	7.60505e-09	5.3787e-09	APOC1/ASNS/APOA1/APOC2/ASS1/APOC3/ASL/ABAT/ACLY/ACADVL/ALOX12B/ALOX5AP/ACACA/ALOX12/ALOX15B/ALDH1A3/ALOX5/ANXA1/APOA4/ACADL/ALOX15/AGXT/ASPA/ACACB	24
GO:0051384	response to glucocorticoid	18/327	137/16672	1.96778e-10	7.63582e-09	5.40046e-09	AANAT/ASS1/ARG1/ANXA1/AIF1/ABCA3/ADM/ADCYAP1/ANXA3/ALAD/APOA2/AGXT/ALDH3A1/AREG/FAS/AQP1/ALPL/AGTR2	18
GO:0072329	monocarboxylic acid catabolic process	16/327	106/16672	2.48978e-10	9.5628e-09	6.76333e-09	ACAT2/ACADSB/AKT1/ABCD1/ALDH3A2/ABCD2/ACADVL/ACOX1/AKT2/ACADL/AGXT/ACADS/ACAA1/ACADM/ACACB/ACAT1	16
GO:0046395	carboxylic acid catabolic process	21/327	195/16672	2.64466e-10	1.0055e-08	7.11147e-09	ACAT2/ACADSB/ASL/AKT1/ABCD1/ABAT/ALDH3A2/ABCD2/AMT/ACADVL/ACOX1/ARG1/AKT2/ACADL/AGXT/ASPA/ACADS/ACAA1/ACADM/ACACB/ACAT1	21
GO:0010872	regulation of cholesterol esterification	7/327	11/16672	3.23205e-10	1.21654e-08	8.60407e-09	APOC1/APOA1/AGTR1/APOA4/AGT/APOE/APOA2	7
GO:0042311	vasodilation	13/327	65/16672	3.29166e-10	1.22671e-08	8.67599e-09	ADRB1/ADORA2B/AGTR1/ADORA1/ADRB3/ADRB2/ALOX12/AGT/ADM/ADCYAP1/APOE/ADCY6/AGTR2	13
GO:0034199	activation of protein kinase A activity	8/327	17/16672	4.19259e-10	1.54715e-08	1.09423e-08	ADCY3/ADCY5/ADCY1/ADCY9/ADCY8/ADCY6/ADCY7/ADCY2	8
GO:0016054	organic acid catabolic process	22/327	221/16672	4.51059e-10	1.64834e-08	1.16579e-08	ACAT2/ACADSB/ASL/AKT1/ABCD1/ABAT/ALDH3A2/ABCD2/AMT/ACADVL/ACOX1/ARG1/AKT2/AHCY/ACADL/AGXT/ASPA/ACADS/ACAA1/ACADM/ACACB/ACAT1	22
GO:0019935	cyclic-nucleotide-mediated signaling	13/327	67/16672	4.90977e-10	1.77696e-08	1.25676e-08	ADCY3/ADRB1/ADCY5/ADCYAP1R1/ADCY1/ADCY9/ADCY8/ADM/ADCYAP1/APOE/ADCY6/ADCY7/ADCY2	13
GO:0019933	cAMP-mediated signaling	12/327	56/16672	6.83294e-10	2.42634e-08	1.71604e-08	ADCY3/ADRB1/ADCY5/ADCYAP1R1/ADCY1/ADCY9/ADCY8/ADM/ADCYAP1/ADCY6/ADCY7/ADCY2	12
GO:0097006	regulation of plasma lipoprotein particle levels	12/327	56/16672	6.83294e-10	2.42634e-08	1.71604e-08	APOC1/APOA1/APOC2/APOC3/ARF1/AGTR1/APOA4/ABCA1/APOB/AGT/APOE/APOA2	12
GO:0001973	adenosine receptor signaling pathway	7/327	12/16672	7.62671e-10	2.68289e-08	1.89749e-08	ADCY5/ADORA2B/ADORA2A/ADA/ADORA1/ADORA3/ACPP	7
GO:0019216	regulation of lipid metabolic process	24/327	274/16672	9.90373e-10	3.45163e-08	2.44118e-08	APOC1/APOA1/APOC2/APOC3/AADAC/AKT1/ABCD2/ARF1/ACADVL/AGTR1/ADORA1/ADRB2/ADRA2A/AKT2/ANXA1/APOA4/APOB/ACADL/AGT/APOD/APOE/SERPINA3/APOA2/ACACB	24
GO:0010038	response to metal ion	25/327	297/16672	1.00773e-09	3.4799e-08	2.46117e-08	PARP1/ACO1/AANAT/ASS1/ABAT/ADCY1/ALOX5AP/ARG1/APBB1/AQP3/ANK3/ANXA11/AQP2/ATF1/AOC1/ALOX15/APP/AQP9/ALAD/ASCL1/ANXA7/ACTA1/FAS/AQP1/APOBEC1	25
GO:0019229	regulation of vasoconstriction	12/327	58/16672	1.05362e-09	3.6053e-08	2.54987e-08	ADRA1B/ABL1/ADRA1A/AKT1/ADRA1D/ADRA2B/AGTR1/ADRA2C/ADRA2A/ASIC2/AGT/ADM	12
GO:0042310	vasoconstriction	13/327	74/16672	1.7903e-09	6.07088e-08	4.29366e-08	ADRA1B/ABL1/ADRA1A/AKT1/ADRA1D/ADRA2B/AGTR1/ADRA2C/ADRA2A/ASIC2/AGT/ADM/ACTA2	13
GO:0006633	fatty acid biosynthetic process	17/327	139/16672	1.95519e-09	6.57085e-08	4.64726e-08	APOC1/APOA1/APOC2/APOC3/ACLY/ACADVL/ALOX12B/ALOX5AP/ACACA/ALOX12/ALOX15B/ALOX5/ANXA1/APOA4/ACADL/ALOX15/ACACB	17
GO:0006898	receptor-mediated endocytosis	24/327	286/16672	2.34213e-09	7.80157e-08	5.5177e-08	ARRB2/APOC1/ASGR2/APOA1/ANGPT1/APOC2/ALB/APOC3/ASGR1/ARF1/AP2B1/ADRB2/ARRB1/AP2A1/ARF6/AMBP/APOB/ANXA2/ADM/APOE/ACHE/AP2A2/GRK2/GRK3	24
GO:0071417	cellular response to organonitrogen compound	31/327	462/16672	2.54183e-09	8.3925e-08	5.93563e-08	ABL1/PARP1/ADCY3/APRT/AANAT/ASS1/ADCY5/AKT1/APEX1/ADCY1/AHSG/AGTR1/ACTN2/ARG1/AQP8/AKT2/ADCY9/AKR1B1/ADCY8/AOC1/AIF1/AGT/APP/AQP9/ADCY6/ADCY7/AQP1/APLP1/APOBEC1/ADCY2/AGTR2	31
GO:0072330	monocarboxylic acid biosynthetic process	19/327	180/16672	2.6849e-09	8.78779e-08	6.2152e-08	APOC1/APOA1/APOC2/APOC3/ACLY/ACADVL/ALOX12B/ALOX5AP/ACACA/ALOX12/ALOX15B/ALDH1A3/ALOX5/ANXA1/APOA4/ACADL/ALOX15/AGXT/ACACB	19
GO:0042044	fluid transport	9/327	29/16672	2.72958e-09	8.857e-08	6.26415e-08	AQP6/AQP8/AQP7/AQP3/AQP2/AQP5/AQP4/AQP9/AQP1	9
GO:0071377	cellular response to glucagon stimulus	10/327	39/16672	2.82008e-09	9.07247e-08	6.41654e-08	ADCY3/ASS1/ADCY5/ADCY1/ARG1/ADCY9/ADCY8/ADCY6/ADCY7/ADCY2	10
GO:0032368	regulation of lipid transport	14/327	92/16672	3.00134e-09	9.57378e-08	6.77109e-08	APOC1/APOA1/APOC2/APOC3/ABCA2/AKT1/AGTR1/AKT2/APOA4/ABCA1/AGT/APOE/APOA2/AGTR2	14
GO:0034433	steroid esterification	7/327	14/16672	3.19492e-09	9.93857e-08	7.0291e-08	APOC1/APOA1/AGTR1/APOA4/AGT/APOE/APOA2	7
GO:0034434	sterol esterification	7/327	14/16672	3.19492e-09	9.93857e-08	7.0291e-08	APOC1/APOA1/AGTR1/APOA4/AGT/APOE/APOA2	7
GO:0034435	cholesterol esterification	7/327	14/16672	3.19492e-09	9.93857e-08	7.0291e-08	APOC1/APOA1/AGTR1/APOA4/AGT/APOE/APOA2	7
GO:0007588	excretion	12/327	64/16672	3.49219e-09	1.07743e-07	7.62015e-08	ADRA1A/ADORA2B/AGTR1/ADORA1/AQP6/AQP7/AQP3/AQP2/AQP5/AGT/AQP9/AGTR2	12
GO:0031667	response to nutrient levels	28/327	390/16672	3.56181e-09	1.08997e-07	7.70887e-08	ASNS/APAF1/APOA1/ASS1/ALB/ADRB1/AKT1/SERPINC1/ADA/ADRB3/ARG1/ADRB2/AQP3/ABCA1/AHCY/AOC1/ARSB/ADSL/ADM/ADCYAP1/APOE/ALAD/ATF3/ALDH3A1/ASCL1/ACACB/ACAT1/ALPL	28
GO:0033344	cholesterol efflux	10/327	41/16672	4.803e-09	1.45794e-07	1.03114e-07	APOC1/APOA1/APOC2/APOC3/ABCA2/APOA4/ABCA1/APOB/APOE/APOA2	10
GO:0042493	response to drug	28/327	397/16672	5.27201e-09	1.58681e-07	1.12228e-07	PARP4/ABL1/AK4/APOA1/ADRA1A/ASS1/ABCA2/ADCYAP1R1/ABAT/APEX1/ADCY1/ABCC6/AMH/ADA/ARG1/ACTC1/ANXA1/ABCA1/AOC1/ABCA3/APOD/ALAD/APOA2/ALDH3A1/PLIN2/ACACB/AQP1/APOBEC1	28
GO:0016101	diterpenoid metabolic process	14/327	96/16672	5.31185e-09	1.58681e-07	1.12228e-07	APOA1/APOC2/ADH7/APOC3/ALDH3A2/ABCA4/ALDH1A1/ADH5/ALDH1A3/APOA4/APOB/APOE/APOA2/ADH4	14
GO:0009127	purine nucleoside monophosphate biosynthetic process	12/327	67/16672	6.04961e-09	1.76517e-07	1.24843e-07	AK4/APRT/ADK/AK2/ADA/AMPD3/ADSL/ALDOA/AMPD2/AK1/ADSS/AMPD1	12
GO:0009168	purine ribonucleoside monophosphate biosynthetic process	12/327	67/16672	6.04961e-09	1.76517e-07	1.24843e-07	AK4/APRT/ADK/AK2/ADA/AMPD3/ADSL/ALDOA/AMPD2/AK1/ADSS/AMPD1	12
GO:1901655	cellular response to ketone	12/327	67/16672	6.04961e-09	1.76517e-07	1.24843e-07	ADCY3/ASS1/ADCY5/AKT1/ADCY1/ARG1/ACACA/AKR1B1/ADCY6/AQP1/ADCY2/AGTR2	12
GO:1903524	positive regulation of blood circulation	13/327	84/16672	8.977e-09	2.59919e-07	1.83829e-07	ADRA1B/ABL1/ADRA1A/ADRB1/AKT1/ADRA1D/ADA/ADRA2C/ALOX12/AGT/ADM/ADCYAP1/AGTR2	13
GO:0006940	regulation of smooth muscle contraction	11/327	56/16672	9.47205e-09	2.72159e-07	1.92486e-07	ADRA1B/ADRA1A/ABAT/ADORA2B/ADRA1D/ADA/ADRA2B/ADRA2C/ADORA1/ADRB2/ADRA2A	11
GO:0003012	muscle system process	27/327	385/16672	1.12902e-08	3.21942e-07	2.27695e-07	ADRA1B/PARP1/ARG2/ADRA1A/ACTN3/ABAT/ADORA2B/ADRA1D/ADA/ADRA2B/ACTN2/ADRA2C/ACTG2/ADORA1/ACTC1/ADRB2/ADRA2A/ANXA6/ANK2/AIF1/ASPH/AGT/ALDOA/ACTA1/ACTA2/GRK2/AGTR2	27
GO:1903522	regulation of blood circulation	23/327	288/16672	1.30459e-08	3.69208e-07	2.61124e-07	ADRA1B/ABL1/ADRA1A/ADRB1/AKT1/ADRA1D/ADA/ADRA2B/AGTR1/ADRA2C/ADORA1/ADRB2/ADRA2A/ALOX12/ASIC2/ANK2/ASPH/AGT/ADM/ADCYAP1/ADCY6/GRK2/AGTR2	23
GO:0010517	regulation of phospholipase activity	11/327	59/16672	1.6894e-08	4.74544e-07	3.35623e-07	ABL1/ADRA1A/APOC2/ADCYAP1R1/AGTR1/ANG/ABL2/ANXA1/ARL1/AGT/ARF4	11
GO:0043691	reverse cholesterol transport	7/327	17/16672	1.72088e-08	4.79806e-07	3.39345e-07	APOA1/APOC2/APOC3/APOA4/ABCA1/APOE/APOA2	7
GO:0001523	retinoid metabolic process	13/327	89/16672	1.84697e-08	5.11175e-07	3.61531e-07	APOA1/APOC2/ADH7/APOC3/ABCA4/ALDH1A1/ADH5/ALDH1A3/APOA4/APOB/APOE/APOA2/ADH4	13
GO:0048545	response to steroid hormone	26/327	369/16672	1.93728e-08	5.32256e-07	3.76441e-07	ARRB2/NR0B1/PARP1/AANAT/ASS1/ARNTL/ABCA2/AR/ARG1/ANXA1/ACR/AIF1/ABCA3/ADM/ADCYAP1/ANXA3/ALAD/APOA2/AGXT/ALDH3A1/AREG/ACTA1/FAS/AQP1/ALPL/AGTR2	26
GO:0006721	terpenoid metabolic process	14/327	106/16672	1.96699e-08	5.36502e-07	3.79444e-07	APOA1/APOC2/ADH7/APOC3/ALDH3A2/ABCA4/ALDH1A1/ADH5/ALDH1A3/APOA4/APOB/APOE/APOA2/ADH4	14
GO:0006936	muscle contraction	24/327	319/16672	1.99221e-08	5.39474e-07	3.81545e-07	ADRA1B/ARG2/ADRA1A/ACTN3/ABAT/ADORA2B/ADRA1D/ADA/ADRA2B/ACTN2/ADRA2C/ACTG2/ADORA1/ACTC1/ADRB2/ADRA2A/ANXA6/ANK2/ASPH/AGT/ALDOA/ACTA1/ACTA2/GRK2	24
GO:1990267	response to transition metal nanoparticle	15/327	124/16672	2.05896e-08	5.53565e-07	3.91511e-07	PARP1/ACO1/AANAT/ASS1/ABAT/ARG1/APBB1/AQP2/ANK2/AOC1/ARSB/AQP9/ALAD/AQP1/APOBEC1	15
GO:0045833	negative regulation of lipid metabolic process	12/327	75/16672	2.29018e-08	6.00501e-07	4.24707e-07	APOC1/APOC2/APOC3/AKT1/ACADVL/ADORA1/ADRA2A/ACADL/APOD/APOE/APOA2/ACACB	12
GO:0050996	positive regulation of lipid catabolic process	8/327	26/16672	2.30951e-08	6.00501e-07	4.24707e-07	APOA1/APOC2/AADAC/ABCD2/ADRB2/AKT2/APOA4/APOA2	8
GO:1901652	response to peptide	28/327	425/16672	2.31176e-08	6.00501e-07	4.24707e-07	PARP1/ADCY3/APRT/AANAT/ASS1/ADCY5/AKT1/AGRP/APEX1/ADCY1/AHSG/AGTR1/ACTN2/ARG1/AKT2/ADCY9/ANXA1/AKR1B1/ADCY8/AGT/ADM/JAG1/AREG/ADCY6/ADCY7/APOBEC1/ADCY2/AGTR2	28
GO:0034370	triglyceride-rich lipoprotein particle remodeling	6/327	11/16672	2.3133e-08	6.00501e-07	4.24707e-07	APOA1/APOC2/APOC3/APOA4/APOE/APOA2	6
GO:0034372	very-low-density lipoprotein particle remodeling	6/327	11/16672	2.3133e-08	6.00501e-07	4.24707e-07	APOA1/APOC2/APOC3/APOA4/APOE/APOA2	6
GO:0033762	response to glucagon	10/327	48/16672	2.48103e-08	6.39631e-07	4.52382e-07	ADCY3/ASS1/ADCY5/ADCY1/ARG1/ADCY9/ADCY8/ADCY6/ADCY7/ADCY2	10
GO:0010817	regulation of hormone levels	29/327	460/16672	3.3758e-08	8.64388e-07	6.11342e-07	AANAT/SLC25A6/ADH7/ARNTL/ACVR2B/ADCY5/AFP/ABAT/ADRA2B/AGTR1/ADRA2C/SLC25A4/ADORA1/ALDH1A1/ASMT/ADRA2A/ARRB1/ALDH1A3/ANXA1/ARL2/AKR1B1/SLC25A5/ALDH9A1/AGT/ADM/ADCYAP1/ARNT/ADH4/AGTR2	29
GO:0019217	regulation of fatty acid metabolic process	12/327	78/16672	3.61225e-08	9.15394e-07	6.47417e-07	APOC1/APOA1/APOC2/APOC3/AKT1/ABCD2/ACADVL/AKT2/ANXA1/APOA4/ACADL/ACACB	12
GO:0006939	smooth muscle contraction	13/327	94/16672	3.62364e-08	9.15394e-07	6.47417e-07	ADRA1B/ADRA1A/ABAT/ADORA2B/ADRA1D/ADA/ADRA2B/ADRA2C/ADORA1/ADRB2/ADRA2A/AGT/ACTA2	13
GO:0032371	regulation of sterol transport	9/327	38/16672	3.80325e-08	9.48042e-07	6.70507e-07	APOC1/APOA1/APOC2/APOC3/ABCA2/APOA4/ABCA1/APOE/APOA2	9
GO:0032374	regulation of cholesterol transport	9/327	38/16672	3.80325e-08	9.48042e-07	6.70507e-07	APOC1/APOA1/APOC2/APOC3/ABCA2/APOA4/ABCA1/APOE/APOA2	9
GO:0090257	regulation of muscle system process	18/327	190/16672	3.87705e-08	9.60081e-07	6.79022e-07	ADRA1B/PARP1/ADRA1A/ACTN3/ABAT/ADORA2B/ADRA1D/ADA/ADRA2B/ADRA2C/ADORA1/ADRB2/ADRA2A/ANXA6/ANK2/AIF1/AGT/GRK2	18
GO:0009156	ribonucleoside monophosphate biosynthetic process	12/327	80/16672	4.83814e-08	1.19024e-06	8.41806e-07	AK4/APRT/ADK/AK2/ADA/AMPD3/ADSL/ALDOA/AMPD2/AK1/ADSS/AMPD1	12
GO:0043434	response to peptide hormone	26/327	390/16672	5.9161e-08	1.44599e-06	1.02268e-06	PARP1/ADCY3/APRT/AANAT/ASS1/ADCY5/AKT1/AGRP/APEX1/ADCY1/AHSG/AGTR1/ACTN2/ARG1/AKT2/ADCY9/ANXA1/ADCY8/AGT/ADM/AREG/ADCY6/ADCY7/APOBEC1/ADCY2/AGTR2	26
GO:0051346	negative regulation of hydrolase activity	26/327	394/16672	7.24918e-08	1.76038e-06	1.24504e-06	ARRB2/ABL1/APOC1/APOA1/APOC3/BIRC5/AKT1/SERPINC1/BIRC2/AHSG/ARRB1/AMBP/ANXA1/ARL2/APLP2/A2M/AGT/APP/ADCYAP1/SERPINA3/APOA2/RHOH/XIAP/BIRC3/AQP1/APCS	26
GO:0032147	activation of protein kinase activity	22/327	292/16672	7.69001e-08	1.85546e-06	1.31228e-06	ABL1/ADCY3/ANGPT1/ACVR2B/ADCY5/ADORA2B/ADCY1/ALK/ADRA2B/ADAM8/ADRA2C/ADORA1/ANG/ADRB2/ADRA2A/ARRB1/ADCY9/ADCY8/AGT/ADCY6/ADCY7/ADCY2	22
GO:0019372	lipoxygenase pathway	6/327	13/16672	8.31135e-08	1.98e-06	1.40036e-06	ALOX12B/ALOX5AP/ALOX12/ALOX15B/ALOX5/ALOX15	6
GO:0043173	nucleotide salvage	6/327	13/16672	8.31135e-08	1.98e-06	1.40036e-06	APRT/ADK/ADA/AMPD3/AMPD2/AMPD1	6
GO:0003073	regulation of systemic arterial blood pressure	12/327	84/16672	8.45935e-08	2.00258e-06	1.41633e-06	ADRA1B/ADRA1A/ADRB1/ADRA1D/AR/AGTR1/ADORA1/ADRB3/ADRB2/ASIC2/AGT/AGTR2	12
GO:0045834	positive regulation of lipid metabolic process	14/327	122/16672	1.2e-07	2.823e-06	1.99658e-06	APOC1/APOA1/APOC2/AADAC/AKT1/ABCD2/AGTR1/ADRB2/AKT2/ANXA1/APOA4/AGT/APOE/APOA2	14
GO:0007193	adenylate cyclase-inhibiting G-protein coupled receptor signaling pathway	11/327	71/16672	1.25338e-07	2.93026e-06	2.07244e-06	ADCY3/ADCY5/ADCY1/ADORA1/ADRA2A/ADCY9/ADCY8/ADCY6/ADCY7/APLP1/ADCY2	11
GO:0070482	response to oxygen levels	22/327	301/16672	1.31034e-07	3.04452e-06	2.15325e-06	APAF1/AKT1/ABAT/BIRC2/ADA/ADAM8/ADORA1/ANG/ACVRL1/ANGPT2/ALAS2/ACTN4/AHCY/ASCL2/ADSL/ADM/ARNT/ALAD/AGER/ALDH3A1/FAS/AQP1	22
GO:0001666	response to hypoxia	21/327	277/16672	1.37731e-07	3.18049e-06	2.24942e-06	APAF1/AKT1/ABAT/BIRC2/ADA/ADAM8/ADORA1/ANG/ACVRL1/ANGPT2/ALAS2/ACTN4/AHCY/ASCL2/ADSL/ADM/ARNT/ALAD/AGER/ALDH3A1/AQP1	21
GO:0050995	negative regulation of lipid catabolic process	7/327	22/16672	1.38681e-07	3.1829e-06	2.25112e-06	APOC1/APOC3/AKT1/ADORA1/ADRA2A/APOA2/ACACB	7
GO:0006937	regulation of muscle contraction	15/327	143/16672	1.41032e-07	3.21723e-06	2.2754e-06	ADRA1B/ADRA1A/ACTN3/ABAT/ADORA2B/ADRA1D/ADA/ADRA2B/ADRA2C/ADORA1/ADRB2/ADRA2A/ANXA6/ANK2/GRK2	15
GO:0009124	nucleoside monophosphate biosynthetic process	12/327	88/16672	1.43343e-07	3.25026e-06	2.29876e-06	AK4/APRT/ADK/AK2/ADA/AMPD3/ADSL/ALDOA/AMPD2/AK1/ADSS/AMPD1	12
GO:0042312	regulation of vasodilation	9/327	44/16672	1.49136e-07	3.36136e-06	2.37734e-06	AGTR1/ADORA1/ADRB2/ALOX12/AGT/ADM/ADCYAP1/ADCY6/AGTR2	9
GO:0090130	tissue migration	19/327	231/16672	1.55425e-07	3.46919e-06	2.4536e-06	APOA1/ANGPT1/AKT1/ACTG2/RHOA/ACTC1/ACVRL1/ANGPT2/ALOX12/APOH/ARSB/AGT/AAMP/RHOB/APOE/ANXA3/ACTA1/ACTA2/AGTR2	19
GO:1901653	cellular response to peptide	22/327	304/16672	1.55763e-07	3.46919e-06	2.4536e-06	PARP1/ADCY3/APRT/ASS1/ADCY5/AKT1/APEX1/ADCY1/AHSG/AGTR1/ACTN2/ARG1/AKT2/ADCY9/AKR1B1/ADCY8/AGT/ADCY6/ADCY7/APOBEC1/ADCY2/AGTR2	22
GO:0008217	regulation of blood pressure	16/327	165/16672	1.61722e-07	3.58072e-06	2.53248e-06	ADRA1B/ADRA1A/ADRB1/ABAT/ADRA1D/AR/AGTR1/ADORA1/ADRB3/ADRB2/ACVRL1/ADH5/ASIC2/AGT/ACTA2/AGTR2	16
GO:0007173	epidermal growth factor receptor signaling pathway	14/327	125/16672	1.63046e-07	3.58892e-06	2.53828e-06	ABL1/AKT1/ADRA2B/ADRA2C/ADORA1/AP2B1/ADRA2A/AP2A1/FASLG/AGT/ARF4/APP/AREG/AP2A2	14
GO:0002576	platelet degranulation	13/327	107/16672	1.73375e-07	3.79409e-06	2.68339e-06	APOA1/ALB/AHSG/ACTN2/ACTN1/APOH/ACTN4/APLP2/A2M/APP/ALDOA/SERPINA3/A1BG	13
GO:0071407	cellular response to organic cyclic compound	29/327	498/16672	1.84588e-07	4.01612e-06	2.84042e-06	ARRB2/ABL1/NR0B1/PARP1/ADCY3/AANAT/ASS1/ARNTL/ADCY5/AKT1/APEX1/ADCY1/AR/ARG1/AQP8/ANXA1/ABCA1/AOC1/AIF1/APP/ADCYAP1/AQP9/ADCY6/ADAR/AQP1/APLP1/ALPL/ADCY2/AGTR2	29
GO:0019932	second-messenger-mediated signaling	19/327	234/16672	1.90213e-07	4.11472e-06	2.91016e-06	ADCY3/ADRB1/ADCY5/ACTN3/ADCYAP1R1/ADCY1/ADA/AGTR1/ADCY9/ANK2/ADCY8/AGT/ADM/ADCYAP1/APOE/ADCY6/ADCY7/ADCY2/AGTR2	19
GO:0035588	G-protein coupled purinergic receptor signaling pathway	7/327	23/16672	1.96016e-07	4.19206e-06	2.96485e-06	ADCY5/ADORA2B/ADORA2A/ADA/ADORA1/ADORA3/ACPP	7
GO:0045940	positive regulation of steroid metabolic process	7/327	23/16672	1.96016e-07	4.19206e-06	2.96485e-06	APOC1/APOA1/AGTR1/APOA4/AGT/APOE/APOA2	7
GO:0051056	regulation of small GTPase mediated signal transduction	21/327	283/16672	1.97498e-07	4.19991e-06	2.9704e-06	APOA1/ADRA1A/APOC3/ARHGAP6/ARHGDIB/ABR/RHOA/RHOC/ARRB1/ARF6/RHOG/ARHGAP5/ARHGDIA/ABCA1/A2M/ARHGDIG/RHOB/APOE/ARHGAP4/RHOH/ARHGAP1	21
GO:0006720	isoprenoid metabolic process	14/327	128/16672	2.19548e-07	4.64259e-06	3.28349e-06	APOA1/APOC2/ADH7/APOC3/ALDH3A2/ABCA4/ALDH1A1/ADH5/ALDH1A3/APOA4/APOB/APOE/APOA2/ADH4	14
GO:0036293	response to decreased oxygen levels	21/327	285/16672	2.22203e-07	4.67247e-06	3.30463e-06	APAF1/AKT1/ABAT/BIRC2/ADA/ADAM8/ADORA1/ANG/ACVRL1/ANGPT2/ALAS2/ACTN4/AHCY/ASCL2/ADSL/ADM/ARNT/ALAD/AGER/ALDH3A1/AQP1	21
GO:0003044	regulation of systemic arterial blood pressure mediated by a chemical signal	9/327	46/16672	2.23908e-07	4.68217e-06	3.31149e-06	ADRA1B/ADRA1A/ADRB1/ADRA1D/AGTR1/ADRB3/ADRB2/AGT/AGTR2	9
GO:0042304	regulation of fatty acid biosynthetic process	8/327	34/16672	2.34087e-07	4.77101e-06	3.37431e-06	APOC1/APOA1/APOC2/APOC3/ACADVL/ANXA1/APOA4/ACADL	8
GO:0034375	high-density lipoprotein particle remodeling	6/327	15/16672	2.34494e-07	4.77101e-06	3.37431e-06	APOC1/APOA1/APOC3/APOA4/APOE/APOA2	6
GO:0043101	purine-containing compound salvage	6/327	15/16672	2.34494e-07	4.77101e-06	3.37431e-06	APRT/ADK/ADA/AMPD3/AMPD2/AMPD1	6
GO:0051004	regulation of lipoprotein lipase activity	6/327	15/16672	2.34494e-07	4.77101e-06	3.37431e-06	APOC1/APOA1/APOC2/APOC3/APOA4/APOH	6
GO:0060192	negative regulation of lipase activity	6/327	15/16672	2.34494e-07	4.77101e-06	3.37431e-06	ABL1/APOC1/APOA1/APOC3/ANXA1/APOA2	6
GO:0071375	cellular response to peptide hormone stimulus	21/327	287/16672	2.4972e-07	5.05348e-06	3.5741e-06	PARP1/ADCY3/APRT/ASS1/ADCY5/AKT1/APEX1/ADCY1/AHSG/AGTR1/ACTN2/ARG1/AKT2/ADCY9/ADCY8/AGT/ADCY6/ADCY7/APOBEC1/ADCY2/AGTR2	21
GO:0032369	negative regulation of lipid transport	7/327	24/16672	2.72095e-07	5.46428e-06	3.86463e-06	APOC1/APOC2/APOC3/AKT1/AKT2/APOA2/AGTR2	7
GO:0015914	phospholipid transport	10/327	61/16672	2.72924e-07	5.46428e-06	3.86463e-06	APOC1/APOA1/APOC2/APOC3/ABCA2/ABCA4/APOA4/ABCA1/APOE/APOA2	10
GO:0010594	regulation of endothelial cell migration	13/327	113/16672	3.30688e-07	6.58576e-06	4.65781e-06	ANGPT1/AKT1/RHOA/ACVRL1/ANGPT2/ALOX12/APOH/AGT/AAMP/RHOB/APOE/ANXA3/AGTR2	13
GO:0010518	positive regulation of phospholipase activity	9/327	49/16672	3.96496e-07	7.85479e-06	5.55534e-06	ADRA1A/APOC2/ADCYAP1R1/AGTR1/ANG/ABL2/ARL1/AGT/ARF4	9
GO:0051051	negative regulation of transport	26/327	430/16672	3.99466e-07	7.87221e-06	5.56765e-06	APOC1/APOA1/ANGPT1/APOC2/APOC3/AKT1/ABAT/ABR/ADA/ADRA2B/ACTN2/ADRA2C/ADORA1/ANXA4/ADRA2A/AKT2/ARF6/ANXA1/ANK3/SLC25A5/ANXA2/ASIC1/ADCYAP1/APOD/APOA2/AGTR2	26
GO:0009306	protein secretion	27/327	460/16672	4.26238e-07	8.35605e-06	5.90985e-06	ABL1/APOA1/ANGPT1/SLC25A6/ARNTL/ACVR2B/ADCY5/ARL4D/ABAT/ARF1/ADAM8/ADRA2C/SLC25A4/ANG/APBB1/ANXA4/ADRA2A/ARRB1/ALOX15B/ANXA1/ARL2/ABCA1/SLC25A5/AGT/APOA2/ACHE/AGTR2	27
GO:0008202	steroid metabolic process	20/327	273/16672	4.75515e-07	9.27378e-06	6.55892e-06	NR0B1/APOC1/APOA1/AFP/ACLY/ACADVL/AGTR1/AKR1B1/APOA4/ABCA1/APOB/ACADL/AGT/ADM/APP/APOF/APOE/APOA2/ACAA1/STS	20
GO:0051271	negative regulation of cellular component movement	19/327	249/16672	4.97225e-07	9.6214e-06	6.80478e-06	ARHGDIB/ABR/APEX1/ADARB1/ADA/ADORA1/RHOA/ACVRL1/ANGPT2/ACTN1/ALOX15B/APOH/ACTN4/AIF1/RHOB/APOD/APOE/ARHGAP4/AGTR2	19
GO:0015748	organophosphate ester transport	11/327	81/16672	4.98452e-07	9.6214e-06	6.80478e-06	APOC1/APOA1/APOC2/SLC25A6/APOC3/ABCA2/ABCA4/APOA4/ABCA1/APOE/APOA2	11
GO:0042058	regulation of epidermal growth factor receptor signaling pathway	11/327	82/16672	5.65724e-07	1.08642e-05	7.68376e-06	AKT1/ADRA2B/ADRA2C/ADORA1/AP2B1/ADRA2A/AP2A1/FASLG/AGT/APP/AP2A2	11
GO:0034380	high-density lipoprotein particle assembly	5/327	10/16672	6.54491e-07	1.25051e-05	8.84429e-06	APOA1/APOA4/ABCA1/APOE/APOA2	5
GO:0046461	neutral lipid catabolic process	8/327	39/16672	7.28295e-07	1.37754e-05	9.74271e-06	APOA1/APOC2/APOC3/AADAC/APOA4/APOB/APOE/APOA2	8
GO:0046464	acylglycerol catabolic process	8/327	39/16672	7.28295e-07	1.37754e-05	9.74271e-06	APOA1/APOC2/APOC3/AADAC/APOA4/APOB/APOE/APOA2	8
GO:0007265	Ras protein signal transduction	21/327	307/16672	7.57504e-07	1.42562e-05	1.00828e-05	APOA1/ADRA1A/APOC3/ARHGAP6/ARHGDIB/ABR/AGTR1/RHOA/ADRA2A/ARRB1/ARF6/RHOG/ARHGAP5/ARHGDIA/ABCA1/AIF1/ARHGDIG/RHOB/APOE/ARHGAP4/ARHGAP1	21
GO:0030336	negative regulation of cell migration	17/327	208/16672	7.7136e-07	1.44448e-05	1.02161e-05	ARHGDIB/ABR/APEX1/ADARB1/ADA/ADORA1/RHOA/ACVRL1/ANGPT2/ALOX15B/APOH/AIF1/RHOB/APOD/APOE/ARHGAP4/AGTR2	17
GO:1901184	regulation of ERBB signaling pathway	11/327	85/16672	8.18044e-07	1.52432e-05	1.07808e-05	AKT1/ADRA2B/ADRA2C/ADORA1/AP2B1/ADRA2A/AP2A1/FASLG/AGT/APP/AP2A2	11
GO:0042632	cholesterol homeostasis	10/327	69/16672	8.95758e-07	1.65276e-05	1.16892e-05	APOA1/APOC2/APOC3/ABCA2/APOA4/ABCA1/APOB/AMPD2/APOE/APOA2	10
GO:0055092	sterol homeostasis	10/327	69/16672	8.95758e-07	1.65276e-05	1.16892e-05	APOA1/APOC2/APOC3/ABCA2/APOA4/ABCA1/APOB/AMPD2/APOE/APOA2	10
GO:0008361	regulation of cell size	15/327	165/16672	9.08379e-07	1.66787e-05	1.17961e-05	ABL1/AKT1/AQP6/AQP8/AQP7/AQP3/AQP2/AQP5/AQP4/AQP9/APOE/ARHGAP4/ANXA7/ADD1/AQP1	15
GO:0007584	response to nutrient	15/327	166/16672	9.81148e-07	1.79274e-05	1.26792e-05	APAF1/APOA1/ASS1/SERPINC1/ADA/ARG1/AQP3/ABCA1/AHCY/ARSB/ADSL/ALAD/ALDH3A1/ASCL1/ALPL	15
GO:0030100	regulation of endocytosis	16/327	190/16672	1.09971e-06	1.99966e-05	1.41427e-05	ARRB2/ABL1/APOC1/BIN1/ANGPT1/APOC2/APOC3/ABR/ARF1/AHSG/ABL2/ARRB1/ARF6/ACTN4/ALOX15/ANXA2	16
GO:0038127	ERBB signaling pathway	14/327	146/16672	1.10817e-06	2.00536e-05	1.4183e-05	ABL1/AKT1/ADRA2B/ADRA2C/ADORA1/AP2B1/ADRA2A/AP2A1/FASLG/AGT/ARF4/APP/AREG/AP2A2	14
GO:0034374	low-density lipoprotein particle remodeling	5/327	11/16672	1.18062e-06	2.12625e-05	1.5038e-05	AGTR1/APOB/AGT/APOE/APOA2	5
GO:0033539	fatty acid beta-oxidation using acyl-CoA dehydrogenase	6/327	19/16672	1.18955e-06	2.13213e-05	1.50796e-05	ACADSB/ACADVL/ACOX1/ACADL/ACADS/ACADM	6
GO:0015909	long-chain fatty acid transport	9/327	56/16672	1.29603e-06	2.31197e-05	1.63515e-05	AKT1/ABCD1/ABCD2/ACACA/AKT2/ANXA1/APOE/PLIN2/ACACB	9
GO:0045860	positive regulation of protein kinase activity	26/327	458/16672	1.31473e-06	2.33427e-05	1.65093e-05	ABL1/ADCY3/ANGPT1/ACVR2B/ADCY5/AKT1/ADORA2B/ADCY1/ALK/ADRA2B/ADAM8/ADRA2C/ADORA1/RHOA/ANG/ADRB2/ADRA2A/ARRB1/ADCY9/ADCY8/AGT/ADCYAP1/AGER/ADCY6/ADCY7/ADCY2	26
GO:0042451	purine nucleoside biosynthetic process	11/327	90/16672	1.46209e-06	2.57164e-05	1.8188e-05	AK4/APRT/AMD1/ADK/AK2/ADA/ADSL/ALDOA/ACAT1/AK1/ADSS	11
GO:0046129	purine ribonucleoside biosynthetic process	11/327	90/16672	1.46209e-06	2.57164e-05	1.8188e-05	AK4/APRT/AMD1/ADK/AK2/ADA/ADSL/ALDOA/ACAT1/AK1/ADSS	11
GO:0030301	cholesterol transport	10/327	73/16672	1.52712e-06	2.67353e-05	1.89086e-05	APOC1/APOA1/APOC2/APOC3/ABCA2/APOA4/ABCA1/APOB/APOE/APOA2	10
GO:0050727	regulation of inflammatory response	20/327	295/16672	1.60132e-06	2.79044e-05	1.97355e-05	ACP5/APOA1/ABR/ADORA2B/BIRC2/AHSG/ADA/AGTR1/ADAM8/ADORA1/ANXA1/A2M/AGT/ADCYAP1/APOD/APOE/AGER/XIAP/BIRC3/APCS	20
GO:0050708	regulation of protein secretion	23/327	377/16672	1.63532e-06	2.83657e-05	2.00618e-05	ABL1/APOA1/ANGPT1/SLC25A6/ARNTL/ADCY5/ABAT/ARF1/ADAM8/ADRA2C/SLC25A4/ANG/APBB1/ANXA4/ADRA2A/ARRB1/ALOX15B/ANXA1/ARL2/SLC25A5/APOA2/ACHE/AGTR2	23
GO:2000146	negative regulation of cell motility	17/327	220/16672	1.68062e-06	2.90177e-05	2.05229e-05	ARHGDIB/ABR/APEX1/ADARB1/ADA/ADORA1/RHOA/ACVRL1/ANGPT2/ALOX15B/APOH/AIF1/RHOB/APOD/APOE/ARHGAP4/AGTR2	17
GO:0015918	sterol transport	10/327	74/16672	1.73539e-06	2.98266e-05	2.1095e-05	APOC1/APOA1/APOC2/APOC3/ABCA2/APOA4/ABCA1/APOB/APOE/APOA2	10
GO:0043542	endothelial cell migration	14/327	152/16672	1.7988e-06	3.07758e-05	2.17663e-05	APOA1/ANGPT1/AKT1/RHOA/ACVRL1/ANGPT2/ALOX12/APOH/AGT/AAMP/RHOB/APOE/ANXA3/AGTR2	14
GO:0035587	purinergic receptor signaling pathway	7/327	31/16672	1.83706e-06	3.12882e-05	2.21287e-05	ADCY5/ADORA2B/ADORA2A/ADA/ADORA1/ADORA3/ACPP	7
GO:0019218	regulation of steroid metabolic process	10/327	75/16672	1.96798e-06	3.33143e-05	2.35617e-05	APOC1/APOA1/ACADVL/AGTR1/APOA4/APOB/ACADL/AGT/APOE/APOA2	10
GO:0010896	regulation of triglyceride catabolic process	5/327	12/16672	1.99142e-06	3.33143e-05	2.35617e-05	APOA1/APOC2/APOC3/AADAC/APOA4	5
GO:0019755	one-carbon compound transport	5/327	12/16672	1.99142e-06	3.33143e-05	2.35617e-05	AQP7/AQP3/AQP5/AQP9/AQP1	5
GO:0033604	negative regulation of catecholamine secretion	5/327	12/16672	1.99142e-06	3.33143e-05	2.35617e-05	ABAT/ADRA2B/ADRA2C/ADRA2A/AGTR2	5
GO:0045055	regulated exocytosis	19/327	274/16672	2.0994e-06	3.49652e-05	2.47293e-05	APOA1/ALB/ABR/ADORA2B/ARF1/AHSG/ACTN2/ADRA2A/ACTN1/APOH/ACTN4/APLP2/A2M/APP/ALDOA/AP1G1/ANXA3/SERPINA3/A1BG	19
GO:0007599	hemostasis	22/327	355/16672	2.14125e-06	3.55052e-05	2.51112e-05	ARRB2/ACTB/AKT1/SERPINC1/ACTG1/ABAT/ADORA2A/ADRA2B/ADRA2C/RHOA/ADRA2A/ARRB1/ALOX12/RHOG/ANXA5/ASIC2/APOH/A2M/ANXA2/RHOB/APOE/ANXA7	22
GO:0051591	response to cAMP	11/327	94/16672	2.26299e-06	3.73592e-05	2.64224e-05	AANAT/ASS1/APEX1/BIRC2/AQP8/APP/AQP9/AGXT/ALDH3A1/AREG/AQP1	11
GO:0044706	multi-multicellular organism process	16/327	201/16672	2.31096e-06	3.78387e-05	2.67616e-05	ACVR1B/ARHGDIB/AKT1/AGRP/AR/ADRA2C/ARG1/ANGPT2/AMBP/AKR1B1/AGT/ADM/ADCYAP1/ADCY7/STS/ACVR2A	16
GO:0034381	plasma lipoprotein particle clearance	7/327	32/16672	2.31214e-06	3.78387e-05	2.67616e-05	APOC1/APOA1/APOC2/APOC3/APOB/APOE/APOA2	7
GO:0007565	female pregnancy	15/327	178/16672	2.36651e-06	3.85608e-05	2.72723e-05	ACVR1B/ARHGDIB/AKT1/AGRP/AR/ADRA2C/ARG1/ANGPT2/AMBP/AKR1B1/AGT/ADM/ADCYAP1/ADCY7/STS	15
GO:0046128	purine ribonucleoside metabolic process	21/327	332/16672	2.65502e-06	4.30754e-05	3.04652e-05	AK4/PARP1/APRT/AMD1/ADK/ACTN3/AK2/ADA/AMPD3/ALDOB/AHCY/ADSL/ALDOA/ADCYAP1/ARNT/AMPD2/ACPP/ACAT1/AK1/ADSS/ALDOC	21
GO:0009119	ribonucleoside metabolic process	22/327	361/16672	2.81474e-06	4.54708e-05	3.21594e-05	AK4/PARP1/APRT/AMD1/ADK/ACTN3/AK2/ADA/AMPD3/ALDOB/AHCY/ADSL/ALDOA/ADCYAP1/ARNT/AMPD2/ACPP/ACAT1/AK1/ADSS/ALDOC/APOBEC1	22
GO:0019433	triglyceride catabolic process	7/327	33/16672	2.88562e-06	4.6219e-05	3.26886e-05	APOA1/APOC2/APOC3/AADAC/APOA4/APOB/APOE	7
GO:0045742	positive regulation of epidermal growth factor receptor signaling pathway	7/327	33/16672	2.88562e-06	4.6219e-05	3.26886e-05	AKT1/ADRA2B/ADRA2C/ADORA1/ADRA2A/FASLG/AGT	7
GO:0042278	purine nucleoside metabolic process	21/327	335/16672	3.05882e-06	4.87855e-05	3.45038e-05	AK4/PARP1/APRT/AMD1/ADK/ACTN3/AK2/ADA/AMPD3/ALDOB/AHCY/ADSL/ALDOA/ADCYAP1/ARNT/AMPD2/ACPP/ACAT1/AK1/ADSS/ALDOC	21
GO:0006471	protein ADP-ribosylation	6/327	22/16672	3.11258e-06	4.94336e-05	3.49621e-05	ART1/PARP4/PARP1/ART3/ART4/ARF4	6
GO:0046040	IMP metabolic process	5/327	13/16672	3.18412e-06	5.03572e-05	3.56154e-05	AMPD3/ADSL/AMPD2/ADSS/AMPD1	5
GO:0042157	lipoprotein metabolic process	13/327	138/16672	3.27653e-06	5.1602e-05	3.64957e-05	APOC1/APOA1/APOC2/ALB/APOC3/ALOX12B/APOA4/ABCA1/APOB/APOD/APOE/APOA2/APOBEC1	13
GO:0030168	platelet activation	14/327	161/16672	3.55943e-06	5.55742e-05	3.93051e-05	ARRB2/ACTB/AKT1/ACTG1/ABAT/ADRA2B/ADRA2C/RHOA/ADRA2A/ARRB1/ALOX12/RHOG/RHOB/APOE	14
GO:1901654	response to ketone	14/327	161/16672	3.55943e-06	5.55742e-05	3.93051e-05	PARP1/ADCY3/AANAT/ASS1/ADCY5/AKT1/ADCY1/ARG1/ACACA/AKR1B1/ADCY6/AQP1/ADCY2/AGTR2	14
GO:1901186	positive regulation of ERBB signaling pathway	7/327	34/16672	3.57305e-06	5.55742e-05	3.93051e-05	AKT1/ADRA2B/ADRA2C/ADORA1/ADRA2A/FASLG/AGT	7
GO:0015837	amine transport	9/327	63/16672	3.58941e-06	5.55989e-05	3.93226e-05	ABAT/ADRA2B/ADRA2C/ARG1/ADRA2A/AGT/AQP9/GRK2/AGTR2	9
GO:0006081	cellular aldehyde metabolic process	9/327	64/16672	4.10555e-06	6.33332e-05	4.47927e-05	ALDH3A2/ALDH1A1/ADH5/ALDH1A3/ALDOB/ALDH9A1/ALDH3B1/ALDH3A1/ADH4	9
GO:0045922	negative regulation of fatty acid metabolic process	6/327	23/16672	4.14196e-06	6.3634e-05	4.50054e-05	APOC1/APOC3/AKT1/ACADVL/ACADL/ACACB	6
GO:0007162	negative regulation of cell adhesion	16/327	211/16672	4.33912e-06	6.61897e-05	4.68129e-05	ABL1/APOA1/ANGPT1/ASS1/ARHGAP6/ARHGDIB/ABAT/ADAM10/ACVRL1/ANGPT2/ALOX12/ANXA1/ARHGDIA/ACTN4/ARHGDIG/APOD	16
GO:0046879	hormone secretion	19/327	288/16672	4.35819e-06	6.61897e-05	4.68129e-05	SLC25A6/ARNTL/ACVR2B/ADCY5/ABAT/ADRA2B/AGTR1/ADRA2C/SLC25A4/ADORA1/ADRA2A/ARRB1/ANXA1/ARL2/SLC25A5/AGT/ADM/ADCYAP1/AGTR2	19
GO:0033674	positive regulation of kinase activity	26/327	489/16672	4.36106e-06	6.61897e-05	4.68129e-05	ABL1/ADCY3/ANGPT1/ACVR2B/ADCY5/AKT1/ADORA2B/ADCY1/ALK/ADRA2B/ADAM8/ADRA2C/ADORA1/RHOA/ANG/ADRB2/ADRA2A/ARRB1/ADCY9/ADCY8/AGT/ADCYAP1/AGER/ADCY6/ADCY7/ADCY2	26
GO:0001659	temperature homeostasis	7/327	35/16672	4.39174e-06	6.63875e-05	4.69529e-05	ADRB1/ABAT/ACADVL/ADORA1/ADRB3/ADRB2/ACADL	7
GO:0046503	glycerolipid catabolic process	8/327	49/16672	4.50142e-06	6.77734e-05	4.7933e-05	APOA1/APOC2/APOC3/AADAC/APOA4/APOB/APOE/APOA2	8
GO:0008203	cholesterol metabolic process	12/327	121/16672	4.58444e-06	6.87484e-05	4.86226e-05	APOC1/APOA1/ACLY/ACADVL/APOA4/ABCA1/APOB/ACADL/APP/APOF/APOE/APOA2	12
GO:0031348	negative regulation of defense response	13/327	143/16672	4.86843e-06	7.25068e-05	5.12808e-05	ACP5/ARRB2/APOA1/ABR/ADA/ADORA1/A2M/ADCYAP1/APOD/APOE/AGER/ADAR/APCS	13
GO:0003085	negative regulation of systemic arterial blood pressure	5/327	14/16672	4.8736e-06	7.25068e-05	5.12808e-05	ADRA1A/ADRB1/ADRB3/ADRB2/AGTR2	5
GO:0009167	purine ribonucleoside monophosphate metabolic process	18/327	264/16672	4.94199e-06	7.32349e-05	5.17957e-05	AK4/PARP1/APRT/ADK/ACTN3/AK2/ADA/AMPD3/ALDOB/ADSL/ALDOA/ADCYAP1/ARNT/AMPD2/AK1/ADSS/ALDOC/AMPD1	18
GO:0010632	regulation of epithelial cell migration	14/327	166/16672	5.09286e-06	7.51746e-05	5.31676e-05	ANGPT1/AKT1/RHOA/ACVRL1/ANGPT2/ALOX12/APOH/ARSB/AGT/AAMP/RHOB/APOE/ANXA3/AGTR2	14
GO:0009126	purine nucleoside monophosphate metabolic process	18/327	265/16672	5.20909e-06	7.65899e-05	5.41685e-05	AK4/PARP1/APRT/ADK/ACTN3/AK2/ADA/AMPD3/ALDOB/ADSL/ALDOA/ADCYAP1/ARNT/AMPD2/AK1/ADSS/ALDOC/AMPD1	18
GO:0045744	negative regulation of G-protein coupled receptor protein signaling pathway	7/327	36/16672	5.3608e-06	7.82095e-05	5.5314e-05	ARRB2/ADA/ADRB2/ADRA2A/ARRB1/ADM/GRK2	7
GO:0045777	positive regulation of blood pressure	7/327	36/16672	5.3608e-06	7.82095e-05	5.5314e-05	ADRA1B/ADRA1A/ADRB1/ADRA1D/ADORA1/ADH5/AGT	7
GO:0042180	cellular ketone metabolic process	16/327	215/16672	5.52142e-06	8.02418e-05	5.67514e-05	APOC1/APOA1/APOC2/APOC3/AKT1/AFP/ABCD2/ACADVL/AKT2/ANXA1/AKR1B1/APOA4/ACADL/ADM/ACACB/ADH4	16
GO:0034329	cell junction assembly	15/327	192/16672	6.02346e-06	8.72012e-05	6.16734e-05	ACTB/ARHGAP6/ACTN3/ACTG1/ACTN2/RHOA/ACVRL1/RHOC/ACTN1/ARL2/ANK2/ACTN4/AGT/APC/APOD	15
GO:0007596	blood coagulation	21/327	350/16672	6.04783e-06	8.72186e-05	6.16857e-05	ARRB2/ACTB/AKT1/SERPINC1/ACTG1/ABAT/ADORA2A/ADRA2B/ADRA2C/RHOA/ADRA2A/ARRB1/ALOX12/RHOG/ANXA5/ASIC2/APOH/A2M/ANXA2/RHOB/APOE	21
GO:0007568	aging	18/327	268/16672	6.09019e-06	8.74942e-05	6.18806e-05	ABL1/APAF1/ADRA1A/ASS1/ARNTL/AKT1/ABAT/APEX1/AMH/ADA/ADRB3/ARG1/ALOX12/AGT/ADM/APOD/ALDH3A1/AMFR	18
GO:1901657	glycosyl compound metabolic process	23/327	408/16672	6.12236e-06	8.76219e-05	6.1971e-05	AK4/PARP1/APRT/AMD1/ADK/ACTN3/AK2/ADA/AMPD3/ALDOB/AKR1B1/AHCY/ADSL/ALDOA/ADCYAP1/ARNT/AMPD2/ACPP/ACAT1/AK1/ADSS/ALDOC/APOBEC1	23
GO:0015908	fatty acid transport	10/327	85/16672	6.24775e-06	8.90777e-05	6.30006e-05	AKT1/ABCD1/ABCD2/ACACA/AKT2/ANXA1/APOE/PLIN2/ACACB/AGTR2	10
GO:1902652	secondary alcohol metabolic process	12/327	126/16672	6.98852e-06	9.92633e-05	7.02044e-05	APOC1/APOA1/ACLY/ACADVL/APOA4/ABCA1/APOB/ACADL/APP/APOF/APOE/APOA2	12
GO:0009914	hormone transport	19/327	298/16672	7.12902e-06	9.9304e-05	7.02332e-05	SLC25A6/ARNTL/ACVR2B/ADCY5/ABAT/ADRA2B/AGTR1/ADRA2C/SLC25A4/ADORA1/ADRA2A/ARRB1/ANXA1/ARL2/SLC25A5/AGT/ADM/ADCYAP1/AGTR2	19
GO:0002029	desensitization of G-protein coupled receptor protein signaling pathway	5/327	15/16672	7.19315e-06	9.9304e-05	7.02332e-05	ARRB2/ADRB2/ARRB1/ADM/GRK2	5
GO:0006000	fructose metabolic process	5/327	15/16672	7.19315e-06	9.9304e-05	7.02332e-05	ALDH1A1/ALDOB/AKR1B1/ALDOA/ALDOC	5
GO:0014061	regulation of norepinephrine secretion	5/327	15/16672	7.19315e-06	9.9304e-05	7.02332e-05	ADRA2B/ADRA2C/ADRA2A/AGT/AGTR2	5
GO:0022401	negative adaptation of signaling pathway	5/327	15/16672	7.19315e-06	9.9304e-05	7.02332e-05	ARRB2/ADRB2/ARRB1/ADM/GRK2	5
GO:0032890	regulation of organic acid transport	5/327	15/16672	7.19315e-06	9.9304e-05	7.02332e-05	AKT1/ABAT/ARG1/AKT2/AGT	5
GO:0051953	negative regulation of amine transport	5/327	15/16672	7.19315e-06	9.9304e-05	7.02332e-05	ABAT/ADRA2B/ADRA2C/ADRA2A/AGTR2	5
GO:0050817	coagulation	21/327	354/16672	7.20245e-06	9.9304e-05	7.02332e-05	ARRB2/ACTB/AKT1/SERPINC1/ACTG1/ABAT/ADORA2A/ADRA2B/ADRA2C/RHOA/ADRA2A/ARRB1/ALOX12/RHOG/ANXA5/ASIC2/APOH/A2M/ANXA2/RHOB/APOE	21
GO:0046883	regulation of hormone secretion	17/327	246/16672	7.59014e-06	0.000104267	7.37436e-05	SLC25A6/ARNTL/ADCY5/ABAT/ADRA2B/AGTR1/ADRA2C/SLC25A4/ADORA1/ADRA2A/ARRB1/ANXA1/ARL2/SLC25A5/AGT/ADCYAP1/AGTR2	17
GO:0009116	nucleoside metabolic process	22/327	386/16672	8.22605e-06	0.000112592	7.96313e-05	AK4/PARP1/APRT/AMD1/ADK/ACTN3/AK2/ADA/AMPD3/ALDOB/AHCY/ADSL/ALDOA/ADCYAP1/ARNT/AMPD2/ACPP/ACAT1/AK1/ADSS/ALDOC/APOBEC1	22
GO:0040013	negative regulation of locomotion	17/327	248/16672	8.44698e-06	0.000115197	8.14737e-05	ARHGDIB/ABR/APEX1/ADARB1/ADA/ADORA1/RHOA/ACVRL1/ANGPT2/ALOX15B/APOH/AIF1/RHOB/APOD/APOE/ARHGAP4/AGTR2	17
GO:0042886	amide transport	18/327	276/16672	9.13217e-06	0.000124092	8.77646e-05	SLC25A6/ARNTL/ACVR2B/ADCY5/ABAT/ADRA2C/SLC25A4/ADORA1/ADRA2A/ARRB1/AQP7/AQP3/ANXA1/ARL2/ABCA1/SLC25A5/ADCYAP1/AQP9	18
GO:0046164	alcohol catabolic process	7/327	39/16672	9.39127e-06	0.000126698	8.96077e-05	ADH7/ALDH1B1/ALDH2/ALDH3B1/APOE/ALDH3B2/ADH4	7
GO:0050433	regulation of catecholamine secretion	7/327	39/16672	9.39127e-06	0.000126698	8.96077e-05	ABAT/ADRA2B/ADRA2C/ADRA2A/AGT/GRK2/AGTR2	7
GO:0009161	ribonucleoside monophosphate metabolic process	18/327	277/16672	9.59548e-06	0.000128991	9.12292e-05	AK4/PARP1/APRT/ADK/ACTN3/AK2/ADA/AMPD3/ALDOB/ADSL/ALDOA/ADCYAP1/ARNT/AMPD2/AK1/ADSS/ALDOC/AMPD1	18
GO:0042455	ribonucleoside biosynthetic process	11/327	109/16672	9.68686e-06	0.000129756	9.17702e-05	AK4/APRT/AMD1/ADK/AK2/ADA/ADSL/ALDOA/ACAT1/AK1/ADSS	11
GO:0048243	norepinephrine secretion	5/327	16/16672	1.0295e-05	0.000137413	9.7186e-05	ADRA2B/ADRA2C/ADRA2A/AGT/AGTR2	5
GO:0052548	regulation of endopeptidase activity	21/327	363/16672	1.0562e-05	0.000140478	9.93535e-05	ARRB2/APAF1/BIRC5/AKT1/SERPINC1/BIRC2/AHSG/ARRB1/ALOX12/AMBP/FASLG/APLP2/ASPH/A2M/AGT/APP/SERPINA3/XIAP/FAS/BIRC3/AQP1	21
GO:0051952	regulation of amine transport	8/327	55/16672	1.09727e-05	0.000145427	0.000102854	ABAT/ADRA2B/ADRA2C/ARG1/ADRA2A/AGT/GRK2/AGTR2	8
GO:0048259	regulation of receptor-mediated endocytosis	9/327	72/16672	1.10583e-05	0.000146048	0.000103293	ARRB2/APOC1/ANGPT1/APOC2/APOC3/ARF1/ARRB1/ARF6/ANXA2	9
GO:0032535	regulation of cellular component size	20/327	340/16672	1.34785e-05	0.000177388	0.000125459	ABL1/AKT1/ARF1/ACTN2/AQP6/AQP8/AQP7/AQP3/ARF6/AQP2/AQP5/ALOX15/AQP4/AQP9/APOE/ARHGAP4/ADD2/ANXA7/ADD1/AQP1	20
GO:0010951	negative regulation of endopeptidase activity	16/327	231/16672	1.36702e-05	0.000178669	0.000126364	ARRB2/BIRC5/AKT1/SERPINC1/BIRC2/AHSG/ARRB1/AMBP/APLP2/A2M/AGT/APP/SERPINA3/XIAP/BIRC3/AQP1	16
GO:0001655	urogenital system development	19/327	312/16672	1.36707e-05	0.000178669	0.000126364	ARG2/ANGPT1/ASS1/ACVR2B/AMH/AR/AGTR1/ANGPT2/ALOX15B/ANXA1/AKR1B1/AQP2/AGT/AMPD2/JAG1/ARL3/ACAT1/ACTA2/AGTR2	19
GO:0016125	sterol metabolic process	12/327	135/16672	1.41838e-05	0.000184067	0.000130182	APOC1/APOA1/ACLY/ACADVL/APOA4/ABCA1/APOB/ACADL/APP/APOF/APOE/APOA2	12
GO:0046320	regulation of fatty acid oxidation	6/327	28/16672	1.42305e-05	0.000184067	0.000130182	AKT1/ABCD2/ACADVL/AKT2/ACADL/ACACB	6
GO:0050690	regulation of defense response to virus by virus	6/327	28/16672	1.42305e-05	0.000184067	0.000130182	ARF1/AP2B1/AP2A1/AP1B1/AP1G1/AP2A2	6
GO:0023058	adaptation of signaling pathway	5/327	17/16672	1.43509e-05	0.000184358	0.000130388	ARRB2/ADRB2/ARRB1/ADM/GRK2	5
GO:0048261	negative regulation of receptor-mediated endocytosis	5/327	17/16672	1.43509e-05	0.000184358	0.000130388	APOC1/APOC2/APOC3/ARF6/ANXA2	5
GO:0050432	catecholamine secretion	7/327	42/16672	1.56621e-05	0.000200518	0.000141817	ABAT/ADRA2B/ADRA2C/ADRA2A/AGT/GRK2/AGTR2	7
GO:0050777	negative regulation of immune response	11/327	115/16672	1.61833e-05	0.000206487	0.000146039	ARRB2/APOA1/ANGPT1/ABR/AMBP/ANXA1/A2M/ALOX15/ADCYAP1/APOA2/ADAR	11
GO:0015718	monocarboxylic acid transport	12/327	137/16672	1.64648e-05	0.00020937	0.000148078	ALB/AKT1/ABCD1/ABCD2/ACACA/AKT2/ANXA1/AQP9/APOE/PLIN2/ACACB/AGTR2	12
GO:0007586	digestion	13/327	160/16672	1.65504e-05	0.00020975	0.000148347	ACO1/APOA1/AMY2B/AMY2A/AMY1A/ADRA2A/APOA4/AQP5/SERPINA3/APOA2/AMY1C/AQP1/AMY1B	13
GO:0046031	ADP metabolic process	9/327	76/16672	1.72816e-05	0.000218281	0.00015438	AK4/ACTN3/AK2/AMPD3/ALDOB/ALDOA/ARNT/AK1/ALDOC	9
GO:0009123	nucleoside monophosphate metabolic process	18/327	290/16672	1.78606e-05	0.000224841	0.00015902	AK4/PARP1/APRT/ADK/ACTN3/AK2/ADA/AMPD3/ALDOB/ADSL/ALDOA/ADCYAP1/ARNT/AMPD2/AK1/ADSS/ALDOC/AMPD1	18
GO:0006979	response to oxidative stress	21/327	376/16672	1.79272e-05	0.000224927	0.000159081	ABL1/PARP1/ARNTL/AKT1/APEX1/ADA/ARG1/ANXA1/AKR1B1/APOA4/AIF1/APP/NUDT2/ALDH3B1/RHOB/ARNT/APOD/APOE/ALAD/AREG/AQP1	21
GO:0045776	negative regulation of blood pressure	7/327	43/16672	1.83958e-05	0.000230039	0.000162696	ADRA1A/ADRB1/ABAT/ADORA1/ADRB3/ADRB2/AGTR2	7
GO:0051048	negative regulation of secretion	14/327	186/16672	1.87476e-05	0.000233662	0.000165258	APOA1/ANGPT1/ABAT/ABR/ADA/ADRA2B/ADRA2C/ADORA1/ANXA4/ADRA2A/ANXA1/ASIC1/APOA2/AGTR2	14
GO:0006639	acylglycerol metabolic process	11/327	118/16672	2.06572e-05	0.000256613	0.000181491	APOC1/APOA1/APOC2/APOC3/AADAC/ANG/APOA4/APOH/APOB/APOE/APOA2	11
GO:0001667	ameboidal-type cell migration	19/327	322/16672	2.12267e-05	0.00026282	0.000185881	ACVR1B/APOA1/ANGPT1/ARHGDIB/AKT1/RHOA/ACVRL1/ANGPT2/ALOX12/APOH/ARSB/AGT/AAMP/RHOB/APOE/ARHGAP4/ANXA3/ACVR1/AGTR2	19
GO:0045923	positive regulation of fatty acid metabolic process	6/327	30/16672	2.16991e-05	0.000267788	0.000189394	APOA1/APOC2/ABCD2/AKT2/ANXA1/APOA4	6
GO:0006638	neutral lipid metabolic process	11/327	119/16672	2.23692e-05	0.000274259	0.000193971	APOC1/APOA1/APOC2/APOC3/AADAC/ANG/APOA4/APOH/APOB/APOE/APOA2	11
GO:0009163	nucleoside biosynthetic process	11/327	119/16672	2.23692e-05	0.000274259	0.000193971	AK4/APRT/AMD1/ADK/AK2/ADA/ADSL/ALDOA/ACAT1/AK1/ADSS	11
GO:1903531	negative regulation of secretion by cell	13/327	165/16672	2.29759e-05	0.000280783	0.000198585	APOA1/ANGPT1/ABAT/ABR/ADRA2B/ADRA2C/ADORA1/ANXA4/ADRA2A/ANXA1/ASIC1/APOA2/AGTR2	13
GO:0060627	regulation of vesicle-mediated transport	22/327	413/16672	2.3479e-05	0.000286003	0.000202277	ARRB2/ABL1/APOC1/BIN1/ANGPT1/APOC2/APOC3/ABR/ADORA2B/ARF1/AHSG/ACTN2/ABL2/ADRA2A/ARRB1/AKT2/ARF6/ANXA1/ACTN4/ALOX15/ANXA2/AP1G1	22
GO:0048771	tissue remodeling	12/327	142/16672	2.36195e-05	0.000286786	0.000202831	ACP5/ACVR2B/ABR/ADAM8/ARG1/ADRB2/ACVRL1/ANXA1/AGT/JAG1/AGER/AGTR2	12
GO:0010466	negative regulation of peptidase activity	16/327	242/16672	2.42923e-05	0.000294007	0.000207938	ARRB2/BIRC5/AKT1/SERPINC1/BIRC2/AHSG/ARRB1/AMBP/APLP2/A2M/AGT/APP/SERPINA3/XIAP/BIRC3/AQP1	16
GO:0014074	response to purine-containing compound	12/327	143/16672	2.53371e-05	0.00030567	0.000216186	AANAT/ASS1/APEX1/BIRC2/AQP8/APP/AQP9/AGXT/ALDH3A1/AREG/AQP1/ADSS	12
GO:0006525	arginine metabolic process	5/327	19/16672	2.61103e-05	0.000312643	0.000221118	ART4/ARG2/ASS1/ASL/ARG1	5
GO:0015874	norepinephrine transport	5/327	19/16672	2.61103e-05	0.000312643	0.000221118	ADRA2B/ADRA2C/ADRA2A/AGT/AGTR2	5
GO:1901659	glycosyl compound biosynthetic process	11/327	121/16672	2.61643e-05	0.000312643	0.000221118	AK4/APRT/AMD1/ADK/AK2/ADA/ADSL/ALDOA/ACAT1/AK1/ADSS	11
GO:0052547	regulation of peptidase activity	21/327	386/16672	2.64476e-05	0.000314252	0.000222256	ARRB2/APAF1/BIRC5/AKT1/SERPINC1/BIRC2/AHSG/ARRB1/ALOX12/AMBP/FASLG/APLP2/ASPH/A2M/AGT/APP/SERPINA3/XIAP/FAS/BIRC3/AQP1	21
GO:0045907	positive regulation of vasoconstriction	6/327	31/16672	2.6466e-05	0.000314252	0.000222256	ADRA1B/ABL1/ADRA1A/AKT1/ADRA1D/ADRA2C	6
GO:0006188	IMP biosynthetic process	4/327	10/16672	2.77951e-05	0.00032694	0.00023123	AMPD3/ADSL/AMPD2/AMPD1	4
GO:0046689	response to mercury ion	4/327	10/16672	2.77951e-05	0.00032694	0.00023123	AQP2/AQP9/ALAD/AQP1	4
GO:0051006	positive regulation of lipoprotein lipase activity	4/327	10/16672	2.77951e-05	0.00032694	0.00023123	APOA1/APOC2/APOA4/APOH	4
GO:0006887	exocytosis	21/327	389/16672	2.9633e-05	0.000346894	0.000245342	APOA1/ALB/ABR/ADORA2B/ANK1/ARF1/AHSG/ACTN2/ADRA2A/ACTN1/ANXA1/APOH/ACTN4/APLP2/A2M/APP/ALDOA/AP1G1/ANXA3/SERPINA3/A1BG	21
GO:0034330	cell junction organization	16/327	246/16672	2.96758e-05	0.000346894	0.000245342	ACTB/ARHGAP6/ACTN3/ACTG1/ACTN2/RHOA/ANG/ACVRL1/RHOC/ACTN1/ARL2/ANK2/ACTN4/AGT/APC/APOD	16
GO:0031623	receptor internalization	9/327	82/16672	3.20712e-05	0.000373733	0.000264325	ARRB2/ANGPT1/ARF1/ARRB1/ANXA2/ADM/ACHE/GRK2/GRK3	9
GO:0061041	regulation of wound healing	11/327	124/16672	3.28965e-05	0.000382168	0.00027029	SERPINC1/ABAT/ADRA2A/ALOX12/ANXA1/ASIC2/APOH/ANXA2/APOE/AGER/APCS	11
GO:0051353	positive regulation of oxidoreductase activity	7/327	47/16672	3.35703e-05	0.000388795	0.000274977	ABL1/AKT1/AGTR1/ABL2/AGT/APOE/AGTR2	7
GO:0010631	epithelial cell migration	15/327	222/16672	3.38721e-05	0.000391088	0.000276599	APOA1/ANGPT1/AKT1/RHOA/ACVRL1/ANGPT2/ALOX12/APOH/ARSB/AGT/AAMP/RHOB/APOE/ANXA3/AGTR2	15
GO:0045932	negative regulation of muscle contraction	5/327	20/16672	3.42566e-05	0.000393116	0.000278033	ADORA2B/ADRA2C/ADORA1/ADRB2/GRK2	5
GO:1903792	negative regulation of anion transport	5/327	20/16672	3.42566e-05	0.000393116	0.000278033	AKT1/ABAT/ADORA1/AKT2/AGTR2	5
GO:0006641	triglyceride metabolic process	10/327	103/16672	3.45078e-05	0.000393598	0.000278374	APOC1/APOA1/APOC2/APOC3/AADAC/APOA4/APOH/APOB/APOE/APOA2	10
GO:0050728	negative regulation of inflammatory response	10/327	103/16672	3.45078e-05	0.000393598	0.000278374	ACP5/APOA1/ABR/ADA/ADORA1/ADCYAP1/APOD/APOE/AGER/APCS	10
GO:0046890	regulation of lipid biosynthetic process	11/327	126/16672	3.81723e-05	0.00043408	0.000307005	APOC1/APOA1/APOC2/APOC3/AKT1/ACADVL/ANXA1/APOA4/APOB/ACADL/APOE	11
GO:0055090	acylglycerol homeostasis	6/327	33/16672	3.85187e-05	0.000435388	0.00030793	APOA1/APOC2/APOC3/APOC4/APOA4/APOE	6
GO:0070328	triglyceride homeostasis	6/327	33/16672	3.85187e-05	0.000435388	0.00030793	APOA1/APOC2/APOC3/APOC4/APOA4/APOE	6
GO:0071320	cellular response to cAMP	7/327	48/16672	3.86477e-05	0.000435539	0.000308036	AANAT/ASS1/APEX1/AQP8/APP/AQP9/AQP1	7
GO:0090132	epithelium migration	15/327	225/16672	3.95569e-05	0.000444455	0.000314342	APOA1/ANGPT1/AKT1/RHOA/ACVRL1/ANGPT2/ALOX12/APOH/ARSB/AGT/AAMP/RHOB/APOE/ANXA3/AGTR2	15
GO:0032372	negative regulation of sterol transport	4/327	11/16672	4.30034e-05	0.000474676	0.000335717	APOC1/APOC2/APOC3/APOA2	4
GO:0032375	negative regulation of cholesterol transport	4/327	11/16672	4.30034e-05	0.000474676	0.000335717	APOC1/APOC2/APOC3/APOA2	4
GO:0042759	long-chain fatty acid biosynthetic process	4/327	11/16672	4.30034e-05	0.000474676	0.000335717	ALOX12B/ALOX12/ALOX15B/ALOX15	4
GO:0045741	positive regulation of epidermal growth factor-activated receptor activity	4/327	11/16672	4.30034e-05	0.000474676	0.000335717	ADRA2B/ADRA2C/ADORA1/ADRA2A	4
GO:0061365	positive regulation of triglyceride lipase activity	4/327	11/16672	4.30034e-05	0.000474676	0.000335717	APOA1/APOC2/APOA4/APOH	4
GO:1901568	fatty acid derivative metabolic process	4/327	11/16672	4.30034e-05	0.000474676	0.000335717	ALOX5AP/ALOX12/ALOX5/ALOX15	4
GO:0010565	regulation of cellular ketone metabolic process	12/327	151/16672	4.34572e-05	0.000478283	0.000338268	APOC1/APOA1/APOC2/APOC3/AKT1/ABCD2/ACADVL/AKT2/ANXA1/APOA4/ACADL/ACACB	12
GO:0043094	cellular metabolic compound salvage	6/327	34/16672	4.6007e-05	0.00050487	0.000357072	APRT/ADK/ADA/AMPD3/AMPD2/AMPD1	6
GO:0046683	response to organophosphorus	11/327	129/16672	4.74474e-05	0.000519163	0.00036718	AANAT/ASS1/APEX1/BIRC2/AQP8/APP/AQP9/AGXT/ALDH3A1/AREG/AQP1	11
GO:0032102	negative regulation of response to external stimulus	16/327	257/16672	5.03038e-05	0.000548822	0.000388157	ACP5/APOA1/ABAT/ABR/ADA/ADORA1/ANGPT2/ALOX12/APOH/AIF1/ANXA2/ADCYAP1/APOD/APOE/AGER/APCS	16
GO:0043535	regulation of blood vessel endothelial cell migration	7/327	50/16672	5.0699e-05	0.000551535	0.000390076	ANGPT1/AKT1/RHOA/ACVRL1/ANGPT2/APOE/AGTR2	7
GO:0031214	biomineral tissue development	11/327	130/16672	5.09416e-05	0.000552577	0.000390813	AMBN/ASGR2/ACVR2B/AHSG/ADRB2/AMELY/ALOX15/ACVR1/AMELX/ALPL/ACVR2A	11
GO:0023061	signal release	21/327	406/16672	5.50962e-05	0.000594218	0.000420263	SLC25A6/ARNTL/ACVR2B/ADCY5/ABAT/APBA1/ADRA2B/AGTR1/ADRA2C/SLC25A4/ADORA1/ADRA2A/ARRB1/ANXA1/ARL2/SLC25A5/AGT/ASIC1/ADM/ADCYAP1/AGTR2	21
GO:0048732	gland development	21/327	406/16672	5.50962e-05	0.000594218	0.000420263	ABL1/NR0B1/AK4/ASNS/APRT/APOA1/ASS1/AKT1/SERPINC1/AR/ADA/ARG1/ALOX15B/AKT2/ARF6/ANXA1/ARHGAP5/ADCYAP1/ASCL1/AREG/ACAT1	21
GO:0010657	muscle cell apoptotic process	7/327	51/16672	5.77875e-05	0.000621463	0.000439533	ARRB2/APAF1/ARRB1/ALOX12/APOH/AGT/ADCYAP1	7
GO:0002526	acute inflammatory response	11/327	132/16672	5.85979e-05	0.000628383	0.000444427	ASS1/SERPINC1/AHSG/ADAM8/ADORA1/A2M/ADCYAP1/SERPINA3/APOA2/ACVR1/APCS	11
GO:0046942	carboxylic acid transport	16/327	261/16672	6.04698e-05	0.000646615	0.000457321	ALB/AKT1/ABCD1/ABAT/ABCD2/APBA1/ADORA1/ACACA/AKT2/ANXA1/AQP9/APOE/AGXT/PLIN2/ACACB/AGTR2	16
GO:0000050	urea cycle	4/327	12/16672	6.35093e-05	0.000677193	0.000478948	ARG2/ASS1/ASL/ARG1	4
GO:1900274	regulation of phospholipase C activity	6/327	36/16672	6.44683e-05	0.000685477	0.000484806	ABL1/ADRA1A/ADCYAP1R1/ANG/ABL2/AGT	6
GO:0001525	angiogenesis	21/327	411/16672	6.56265e-05	0.000695826	0.000492126	ANGPT1/ANPEP/ADAM8/RHOA/ANG/ACVRL1/ANGPT2/ALOX12/FASLG/APOH/KLK3/AGT/ANXA2/ADM/AAMP/RHOB/JAG1/APOD/ANXA3/ACVR1/AQP1	21
GO:1901565	organonitrogen compound catabolic process	19/327	350/16672	6.58836e-05	0.000696589	0.000492666	ACY1/ACADSB/ASL/ABAT/AMT/ADA/ANPEP/ARG1/AMPD3/AOX1/AMBP/AHCY/ARSB/ACADL/AGXT/ASPA/ACAN/ACAT1/APOBEC1	19
GO:0007015	actin filament organization	18/327	323/16672	7.33266e-05	0.000770809	0.000545158	ABL1/APOA1/ARHGAP6/ARF1/ACTN2/RHOA/ANG/ACTC1/ARRB1/ACTN1/ARF6/ACTN4/AIF1/ALOX15/ALDOA/ADD2/ACTA1/ADD1	18
GO:0009135	purine nucleoside diphosphate metabolic process	9/327	91/16672	7.35176e-05	0.000770809	0.000545158	AK4/ACTN3/AK2/AMPD3/ALDOB/ALDOA/ARNT/AK1/ALDOC	9
GO:0009179	purine ribonucleoside diphosphate metabolic process	9/327	91/16672	7.35176e-05	0.000770809	0.000545158	AK4/ACTN3/AK2/AMPD3/ALDOB/ALDOA/ARNT/AK1/ALDOC	9
GO:1901616	organic hydroxy compound catabolic process	7/327	53/16672	7.44016e-05	0.00077791	0.00055018	ADH7/ALDH1B1/ALDH2/ALDH3B1/APOE/ALDH3B2/ADH4	7
GO:0051937	catecholamine transport	7/327	54/16672	8.40621e-05	0.000876482	0.000619896	ABAT/ADRA2B/ADRA2C/ADRA2A/AGT/GRK2/AGTR2	7
GO:0002790	peptide secretion	15/327	241/16672	8.64117e-05	0.000898491	0.000635461	SLC25A6/ARNTL/ACVR2B/ADCY5/ABAT/ADRA2C/SLC25A4/ADORA1/ADRA2A/ARRB1/ANXA1/ARL2/ABCA1/SLC25A5/ADCYAP1	15
GO:0009185	ribonucleoside diphosphate metabolic process	9/327	93/16672	8.71842e-05	0.000904025	0.000639376	AK4/ACTN3/AK2/AMPD3/ALDOB/ALDOA/ARNT/AK1/ALDOC	9
GO:0043534	blood vessel endothelial cell migration	8/327	73/16672	8.92251e-05	0.000922646	0.000652546	APOA1/ANGPT1/AKT1/RHOA/ACVRL1/ANGPT2/APOE/AGTR2	8
GO:0051259	protein oligomerization	22/327	454/16672	9.58886e-05	0.000988835	0.000699358	APAF1/ASL/BIRC2/AR/ACTN2/ALOX5AP/ARG1/ACACA/ACVRL1/ANXA6/ACADL/ANXA2/ASIC1/ADSL/ALDOA/ALAD/ACHE/ACACB/FAS/BIRC3/ACAT1/AMFR	22
GO:0048514	blood vessel morphogenesis	23/327	487/16672	9.79556e-05	0.00100739	0.000712481	ANGPT1/ANPEP/ADAM8/RHOA/ANG/ACVRL1/ANGPT2/ALOX12/FASLG/APOH/APOB/KLK3/AGT/ANXA2/ADM/AAMP/RHOB/JAG1/APOD/APOE/ANXA3/ACVR1/AQP1	23
GO:0010596	negative regulation of endothelial cell migration	6/327	39/16672	0.000102777	0.00105272	0.000744538	RHOA/ACVRL1/ANGPT2/APOH/APOE/AGTR2	6
GO:0046545	development of primary female sexual characteristics	9/327	95/16672	0.000102922	0.00105272	0.000744538	ARRB2/ACVR1B/AFP/ADCYAP1R1/AMH/ANG/ARRB1/ADCYAP1/AMHR2	9
GO:0045216	cell-cell junction organization	14/327	218/16672	0.000106399	0.00108533	0.000767602	ARHGAP6/ACTN3/ACTN2/RHOA/ANG/ACVRL1/RHOC/ACTN1/ARL2/ANK2/ACTN4/AGT/APC/APOD	14
GO:0007176	regulation of epidermal growth factor-activated receptor activity	5/327	25/16672	0.000108307	0.00109883	0.000777154	ADRA2B/ADRA2C/ADORA1/ADRA2A/APP	5
GO:0043537	negative regulation of blood vessel endothelial cell migration	5/327	25/16672	0.000108307	0.00109883	0.000777154	RHOA/ACVRL1/ANGPT2/APOE/AGTR2	5
GO:0034599	cellular response to oxidative stress	14/327	220/16672	0.000117208	0.00118595	0.000838766	ABL1/PARP1/ARNTL/AKT1/APEX1/ARG1/ANXA1/AKR1B1/APOA4/AIF1/ALDH3B1/RHOB/ARNT/AQP1	14
GO:0045471	response to ethanol	10/327	119/16672	0.000118101	0.00119177	0.000842888	ADH7/ADCYAP1R1/ABAT/BIRC2/ACTC1/ADCYAP1/ALAD/ADCY7/ADH6/APOBEC1	10
GO:0043687	post-translational protein modification	6/327	40/16672	0.000118939	0.00119702	0.000846597	ARSA/ARSD/ARSE/ARSB/ARSF/STS	6
GO:0060135	maternal process involved in female pregnancy	7/327	57/16672	0.000119343	0.00119789	0.000847212	AKT1/AGRP/AR/ARG1/ANGPT2/AKR1B1/ADCY7	7
GO:1903034	regulation of response to wounding	11/327	143/16672	0.000120815	0.00120943	0.000855376	SERPINC1/ABAT/ADRA2A/ALOX12/ANXA1/ASIC2/APOH/ANXA2/APOE/AGER/APCS	11
GO:0001976	neurological system process involved in regulation of systemic arterial blood pressure	4/327	14/16672	0.000124499	0.00122996	0.000869896	ADRA1A/ASIC2/AGT/AGTR2	4
GO:0019627	urea metabolic process	4/327	14/16672	0.000124499	0.00122996	0.000869896	ARG2/ASS1/ASL/ARG1	4
GO:0045717	negative regulation of fatty acid biosynthetic process	4/327	14/16672	0.000124499	0.00122996	0.000869896	APOC1/APOC3/ACADVL/ACADL	4
GO:0045723	positive regulation of fatty acid biosynthetic process	4/327	14/16672	0.000124499	0.00122996	0.000869896	APOA1/APOC2/ANXA1/APOA4	4
GO:0045986	negative regulation of smooth muscle contraction	4/327	14/16672	0.000124499	0.00122996	0.000869896	ADORA2B/ADRA2C/ADORA1/ADRB2	4
GO:0001974	blood vessel remodeling	6/327	41/16672	0.000137053	0.00135044	0.000955102	ACVR2B/ABR/ACVRL1/AGT/JAG1/AGTR2	6
GO:0002697	regulation of immune effector process	17/327	310/16672	0.000140693	0.00137909	0.000975366	ARRB2/APOA1/ANGPT1/ABR/ADORA2B/BIRC2/ARF1/AP2B1/AP2A1/ANXA1/A2M/AP1B1/AP1G1/APOA2/AGER/AP2A2/BIRC3	17
GO:0048511	rhythmic process	17/327	310/16672	0.000140693	0.00137909	0.000975366	ARRB2/AANAT/AHR/ARNTL/AFP/AGRP/ADCY1/AMH/ADA/ADORA1/ANG/ARRB1/ANXA1/AHCY/ADCYAP1/ZFHX3/FAS	17
GO:0045987	positive regulation of smooth muscle contraction	5/327	27/16672	0.00015936	0.001558	0.0011019	ADRA1B/ADRA1A/ABAT/ADRA1D/ADA	5
GO:0061045	negative regulation of wound healing	7/327	60/16672	0.000165797	0.00161674	0.00114344	ABAT/ALOX12/APOH/ANXA2/APOE/AGER/APCS	7
GO:0015833	peptide transport	15/327	256/16672	0.000168651	0.00164032	0.00116012	SLC25A6/ARNTL/ACVR2B/ADCY5/ABAT/ADRA2C/SLC25A4/ADORA1/ADRA2A/ARRB1/ANXA1/ARL2/ABCA1/SLC25A5/ADCYAP1	15
GO:0051047	positive regulation of secretion	18/327	346/16672	0.000174049	0.00168846	0.00119417	ABL1/ABAT/ADORA2B/ARF1/ADAM8/ALOX12B/ADORA1/ANG/APBB1/ARRB1/ALOX15B/AGT/ADCYAP1/AP1G1/ACHE/AQP1/GRK2/AGTR2	18
GO:2000273	positive regulation of receptor activity	6/327	43/16672	0.000179807	0.00173983	0.0012305	ADRA2B/ACTN2/ADRA2C/ADORA1/ADRA2A/ANXA2	6
GO:0015711	organic anion transport	17/327	317/16672	0.000183604	0.00177201	0.00125326	ALB/AKT1/ABCD1/ABAT/ABCD2/APBA1/ADORA1/ACACA/AKT2/ANXA1/AQP9/APOE/AGXT/PLIN2/ACACB/AQP1/AGTR2	17
GO:0045909	positive regulation of vasodilation	5/327	28/16672	0.00019091	0.00183312	0.00129648	ALOX12/AGT/ADM/ADCYAP1/AGTR2	5
GO:0070266	necroptotic process	5/327	28/16672	0.00019091	0.00183312	0.00129648	BIRC2/SLC25A4/FASLG/FAS/BIRC3	5
GO:0043154	negative regulation of cysteine-type endopeptidase activity involved in apoptotic process	8/327	82/16672	0.000203125	0.00194051	0.00137244	ARRB2/BIRC5/AKT1/BIRC2/ARRB1/XIAP/BIRC3/AQP1	8
GO:0050688	regulation of defense response to virus	8/327	82/16672	0.000203125	0.00194051	0.00137244	BIRC2/ARF1/AP2B1/AP2A1/AP1B1/AP1G1/AP2A2/BIRC3	8
GO:0006665	sphingolipid metabolic process	11/327	152/16672	0.00020721	0.00196954	0.00139297	ARSA/ALDH3A2/ALOX12B/ARSD/ARSE/ARSB/ARSF/ASAH1/ALDH3B1/STS/ALDH3B2	11
GO:0097305	response to alcohol	11/327	152/16672	0.00020721	0.00196954	0.00139297	ADH7/ADCYAP1R1/ABAT/BIRC2/ACTC1/ABCA1/ADCYAP1/ALAD/ADCY7/ADH6/APOBEC1	11
GO:0000302	response to reactive oxygen species	13/327	205/16672	0.000211369	0.00200401	0.00141735	ABL1/APEX1/ADA/ARG1/ANXA1/AKR1B1/APOA4/NUDT2/RHOB/APOD/APOE/AREG/AQP1	13
GO:0001822	kidney development	15/327	262/16672	0.000216967	0.00205191	0.00145123	ARG2/ANGPT1/ASS1/ACVR2B/AGTR1/ANGPT2/AKR1B1/AQP2/AGT/AMPD2/JAG1/ARL3/ACAT1/ACTA2/AGTR2	15
GO:0010744	positive regulation of macrophage derived foam cell differentiation	4/327	16/16672	0.000219443	0.00205981	0.00145681	AGTR1/ALOX15B/APOB/AGT	4
GO:0031998	regulation of fatty acid beta-oxidation	4/327	16/16672	0.000219443	0.00205981	0.00145681	AKT1/ABCD2/AKT2/ACACB	4
GO:0071941	nitrogen cycle metabolic process	4/327	16/16672	0.000219443	0.00205981	0.00145681	ARG2/ASS1/ASL/ARG1	4
GO:0006809	nitric oxide biosynthetic process	7/327	63/16672	0.000225896	0.00211498	0.00149583	ACP5/ARG2/ASS1/AKT1/AIF1/AGT/AGTR2	7
GO:0000038	very long-chain fatty acid metabolic process	5/327	29/16672	0.000227006	0.00211498	0.00149583	ABCD1/ABCD2/ACADVL/ACOX1/ACAA1	5
GO:0010743	regulation of macrophage derived foam cell differentiation	5/327	29/16672	0.000227006	0.00211498	0.00149583	AGTR1/ALOX15B/ABCA1/APOB/AGT	5
GO:0071248	cellular response to metal ion	10/327	129/16672	0.000229797	0.0021357	0.00151048	PARP1/ADCY1/ALOX5AP/ANK3/AQP2/AOC1/ALOX15/ALAD/FAS/AQP1	10
GO:0010660	regulation of muscle cell apoptotic process	6/327	45/16672	0.000232455	0.00215028	0.0015208	ARRB2/ARRB1/ALOX12/APOH/AGT/ADCYAP1	6
GO:0042445	hormone metabolic process	12/327	180/16672	0.000232509	0.00215028	0.0015208	AANAT/ADH7/AFP/ALDH1A1/ASMT/ALDH1A3/AKR1B1/ALDH9A1/AGT/ADM/ARNT/ADH4	12
GO:0007589	body fluid secretion	8/327	84/16672	0.000240187	0.00221584	0.00156716	APRT/SERPINC1/ADA/ALOX12B/ADORA1/AQP5/ANXA2/AQP1	8
GO:0019915	lipid storage	7/327	64/16672	0.000249434	0.00229553	0.00162352	APOA1/APOC4/ABCA1/APOB/APOE/PLIN2/ACACB	7
GO:0034754	cellular hormone metabolic process	9/327	107/16672	0.000255832	0.00234866	0.0016611	AANAT/ADH7/AFP/ALDH1A1/ASMT/ALDH1A3/AKR1B1/ADM/ADH4	9
GO:0006820	anion transport	21/327	454/16672	0.000260209	0.00238169	0.00168446	ALB/AKT1/ABCD1/ABAT/ASNA1/ABCD2/APBA1/ABCC6/ADORA1/ACACA/AQP6/AKT2/ANXA1/ABCA1/AQP9/APOE/AGXT/PLIN2/ACACB/AQP1/AGTR2	21
GO:0022600	digestive system process	8/327	85/16672	0.000260695	0.00238169	0.00168446	ACO1/APOA1/ADRA2A/APOA4/AQP5/SERPINA3/APOA2/AQP1	8
GO:0072132	mesenchyme morphogenesis	6/327	46/16672	0.000262965	0.00239661	0.00169502	ACTG2/ACTC1/ACVRL1/ACVR1/ACTA1/ACTA2	6
GO:0043271	negative regulation of ion transport	9/327	108/16672	0.000274366	0.00249448	0.00176423	AKT1/ABAT/ACTN2/ADORA1/ADRA2A/AKT2/ANK3/ADCYAP1/AGTR2	9
GO:0031649	heat generation	4/327	17/16672	0.000282548	0.00255097	0.00180418	ADRB1/ABAT/ADRB3/ADRB2	4
GO:0043651	linoleic acid metabolic process	4/327	17/16672	0.000282548	0.00255097	0.00180418	ABCD1/ALOX12B/ALOX12/ALOX15B	4
GO:0051341	regulation of oxidoreductase activity	8/327	86/16672	0.000282613	0.00255097	0.00180418	ABL1/AKT1/AGTR1/ABL2/AGT/APOE/ACVR2A/AGTR2	8
GO:0046660	female sex differentiation	9/327	109/16672	0.000293998	0.00264739	0.00187238	ARRB2/ACVR1B/AFP/ADCYAP1R1/AMH/ANG/ARRB1/ADCYAP1/AMHR2	9
GO:0010595	positive regulation of endothelial cell migration	7/327	66/16672	0.00030243	0.00271034	0.0019169	ANGPT1/AKT1/ALOX12/AGT/AAMP/RHOB/ANXA3	7
GO:0042440	pigment metabolic process	7/327	66/16672	0.00030243	0.00271034	0.0019169	APRT/ASIP/ADA/ALAS2/AMBP/ALAS1/ALAD	7
GO:0045861	negative regulation of proteolysis	16/327	301/16672	0.000311948	0.00278901	0.00197254	ARRB2/BIRC5/AKT1/SERPINC1/BIRC2/AHSG/ARRB1/AMBP/APLP2/A2M/AGT/APP/SERPINA3/XIAP/BIRC3/AQP1	16
GO:0090207	regulation of triglyceride metabolic process	5/327	31/16672	0.000314529	0.00280042	0.00198061	APOA1/APOC2/APOC3/AADAC/APOA4	5
GO:0035023	regulation of Rho protein signal transduction	9/327	110/16672	0.000314779	0.00280042	0.00198061	APOA1/ADRA1A/APOC3/ARHGDIB/ABR/ARRB1/ARHGDIA/ABCA1/APOE	9
GO:0009894	regulation of catabolic process	22/327	494/16672	0.000315456	0.00280042	0.00198061	APOC1/APAF1/APOA1/ARAF/APOC2/APOC3/AADAC/ACTN3/AKT1/ABCD2/ADAM8/ADORA1/ADRB2/ADRA2A/AKT2/APOA4/ANXA2/APC/ARNT/APOE/APOA2/ACACB	22
GO:0008643	carbohydrate transport	12/327	187/16672	0.000330116	0.00292366	0.00206777	AKT1/AQP6/AQP8/AQP7/AQP3/AKT2/AQP2/AQP5/AQP4/AGT/AQP9/AQP1	12
GO:0050818	regulation of coagulation	8/327	88/16672	0.000330974	0.00292438	0.00206828	SERPINC1/ABAT/ALOX12/ANXA5/ASIC2/APOH/ANXA2/APOE	8
GO:2000116	regulation of cysteine-type endopeptidase activity	13/327	216/16672	0.000351209	0.0030959	0.00218959	ARRB2/APAF1/BIRC5/AKT1/BIRC2/ARRB1/ALOX12/FASLG/ASPH/XIAP/FAS/BIRC3/AQP1	13
GO:0001676	long-chain fatty acid metabolic process	8/327	89/16672	0.000357569	0.0031446	0.00222403	ABCD1/ACOX1/ALOX12B/ALOX12/ALOX15B/ACADL/ALOX15/ACAA1	8
GO:0015844	monoamine transport	7/327	68/16672	0.000364104	0.00317424	0.00224499	ABAT/ADRA2B/ADRA2C/ADRA2A/AGT/GRK2/AGTR2	7
GO:0046209	nitric oxide metabolic process	7/327	68/16672	0.000364104	0.00317424	0.00224499	ACP5/ARG2/ASS1/AKT1/AIF1/AGT/AGTR2	7
GO:1903035	negative regulation of response to wounding	7/327	68/16672	0.000364104	0.00317424	0.00224499	ABAT/ALOX12/APOH/ANXA2/APOE/AGER/APCS	7
GO:0010955	negative regulation of protein processing	5/327	32/16672	0.000366842	0.00317424	0.00224499	BIRC5/BIRC2/A2M/XIAP/BIRC3	5
GO:0034694	response to prostaglandin	5/327	32/16672	0.000366842	0.00317424	0.00224499	AANAT/AKT1/ACACA/APOB/ADCY6	5
GO:0050892	intestinal absorption	5/327	32/16672	0.000366842	0.00317424	0.00224499	ACO1/APOA1/ADRA2A/APOA4/APOA2	5
GO:1903318	negative regulation of protein maturation	5/327	32/16672	0.000366842	0.00317424	0.00224499	BIRC5/BIRC2/A2M/XIAP/BIRC3	5
GO:0032844	regulation of homeostatic process	20/327	433/16672	0.000370184	0.0031958	0.00226025	ABL1/PARP1/ACVR1B/ADCY5/ADCYAP1R1/ABAT/ADA/AGTR1/ADAM8/ADORA1/ADRA2A/ARRB1/ALOX12/ANXA1/ANK3/ANK2/AGT/ARNT/ACVR2A/AGTR2	20
GO:0072001	renal system development	15/327	276/16672	0.000378423	0.00325731	0.00230375	ARG2/ANGPT1/ASS1/ACVR2B/AGTR1/ANGPT2/AKR1B1/AQP2/AGT/AMPD2/JAG1/ARL3/ACAT1/ACTA2/AGTR2	15
GO:1901617	organic hydroxy compound biosynthetic process	11/327	163/16672	0.000379039	0.00325731	0.00230375	APOA1/ADCYAP1R1/ASIP/ACLY/ALOX12/AKR1B1/APOA4/APOB/ALOX15/APOE/AGTR2	11
GO:0033559	unsaturated fatty acid metabolic process	9/327	113/16672	0.000384531	0.00329698	0.00233181	ABCD1/ACOX1/ALOX12B/ALOX5AP/ALOX12/ALOX15B/ALOX5/ANXA1/ALOX15	9
GO:1901605	alpha-amino acid metabolic process	12/327	191/16672	0.00040008	0.00342251	0.00242058	ASNS/ART4/ARG2/ASS1/ASL/AMT/ARG1/AHCY/AGXT/ASPA/ACAT1/ADSS	12
GO:0009132	nucleoside diphosphate metabolic process	9/327	114/16672	0.000410433	0.00349518	0.00247198	AK4/ACTN3/AK2/AMPD3/ALDOB/ALDOA/ARNT/AK1/ALDOC	9
GO:0042476	odontogenesis	9/327	114/16672	0.000410433	0.00349518	0.00247198	AMBN/ACVR2B/AQP6/AQP3/AQP5/ADM/AMELX/AQP1/ALPL	9
GO:0046148	pigment biosynthetic process	6/327	50/16672	0.000417754	0.00352562	0.00249351	APRT/ASIP/ADA/ALAS2/ALAS1/ALAD	6
GO:0050819	negative regulation of coagulation	6/327	50/16672	0.000417754	0.00352562	0.00249351	ABAT/ALOX12/ANXA5/APOH/ANXA2/APOE	6
GO:0050885	neuromuscular process controlling balance	6/327	50/16672	0.000417754	0.00352562	0.00249351	ABL1/ADCY5/ABR/AARS/ALDH1A3/APP	6
GO:0071385	cellular response to glucocorticoid stimulus	6/327	50/16672	0.000417754	0.00352562	0.00249351	ASS1/ARG1/ANXA1/ADCYAP1/AQP1/AGTR2	6
GO:0043281	regulation of cysteine-type endopeptidase activity involved in apoptotic process	12/327	192/16672	0.000419408	0.00353166	0.00249778	ARRB2/APAF1/BIRC5/AKT1/BIRC2/ARRB1/ALOX12/FASLG/XIAP/FAS/BIRC3/AQP1	12
GO:0043410	positive regulation of MAPK cascade	21/327	471/16672	0.000423941	0.00356186	0.00251914	ADRA1B/ARRB2/ABL1/ADRA1A/ANGPT1/ADORA2B/ALK/AR/ADRA2B/ADAM8/ADRA2C/ALOX12B/ADORA1/ADRB3/ADRB2/ADRA2A/ARRB1/ALOX15/ADCYAP1/AGER/FAS	21
GO:0006144	purine nucleobase metabolic process	4/327	19/16672	0.000446111	0.00372362	0.00263355	APRT/ADA/AOX1/ACPP	4
GO:0090208	positive regulation of triglyceride metabolic process	4/327	19/16672	0.000446111	0.00372362	0.00263355	APOA1/APOC2/AADAC/APOA4	4
GO:0042158	lipoprotein biosynthetic process	8/327	92/16672	0.000447975	0.00372362	0.00263355	APOA1/ALOX12B/APOA4/ABCA1/APOB/APOE/APOA2/APOBEC1	8
GO:0046939	nucleotide phosphorylation	8/327	92/16672	0.000447975	0.00372362	0.00263355	AK4/ACTN3/AK2/ALDOB/ALDOA/ARNT/AK1/ALDOC	8
GO:0006875	cellular metal ion homeostasis	21/327	473/16672	0.000448141	0.00372362	0.00263355	ADRA1B/ABL1/ACO1/ADRA1A/ADCY5/ADCYAP1R1/ARF1/ADRA1D/AGTR1/ABL2/ABCB7/ALAS2/ANXA6/ANK2/AGT/ADM/APP/ADCYAP1/APOE/ANXA7/AGTR2	21
GO:2001057	reactive nitrogen species metabolic process	7/327	71/16672	0.000475097	0.00393891	0.00278581	ACP5/ARG2/ASS1/AKT1/AIF1/AGT/AGTR2	7
GO:0043393	regulation of protein binding	11/327	168/16672	0.000489853	0.00401681	0.0028409	ARRB2/ABL1/ANGPT1/AES/ADRB2/ARRB1/ANXA2/APP/ADD2/ADD1/AMFR	11
GO:0010742	macrophage derived foam cell differentiation	5/327	34/16672	0.000490896	0.00401681	0.0028409	AGTR1/ALOX15B/ABCA1/APOB/AGT	5
GO:0010863	positive regulation of phospholipase C activity	5/327	34/16672	0.000490896	0.00401681	0.0028409	ADRA1A/ADCYAP1R1/ANG/ABL2/AGT	5
GO:0090077	foam cell differentiation	5/327	34/16672	0.000490896	0.00401681	0.0028409	AGTR1/ALOX15B/ABCA1/APOB/AGT	5
GO:0097300	programmed necrotic cell death	5/327	34/16672	0.000490896	0.00401681	0.0028409	BIRC2/SLC25A4/FASLG/FAS/BIRC3	5
GO:1903523	negative regulation of blood circulation	5/327	34/16672	0.000490896	0.00401681	0.0028409	ADRA1A/ADORA1/ADM/GRK2/AGTR2	5
GO:0001701	in utero embryonic development	16/327	314/16672	0.000496668	0.00405523	0.00286808	ACVR1B/ANGPT1/AKT1/APBA1/AR/ADA/ADAM10/ACVRL1/ASCL2/APOB/ADM/ARNT/ACVR1/ADAR/APBA2/ADD1	16
GO:0030073	insulin secretion	12/327	196/16672	0.000504797	0.00411268	0.00290871	SLC25A6/ARNTL/ACVR2B/ADCY5/ABAT/ADRA2C/SLC25A4/ADRA2A/ARRB1/ANXA1/ARL2/SLC25A5	12
GO:0009144	purine nucleoside triphosphate metabolic process	14/327	254/16672	0.000511988	0.00416225	0.00294377	AK4/PARP1/ADK/ACTN3/AK2/ADA/AMPD3/ALDOB/ALDOA/ADCYAP1/ARNT/AMPD2/AK1/ALDOC	14
GO:0006687	glycosphingolipid metabolic process	7/327	72/16672	0.000517559	0.00417453	0.00295245	ARSA/ARSD/ARSE/ARSB/ARSF/ASAH1/STS	7
GO:1901606	alpha-amino acid catabolic process	7/327	72/16672	0.000517559	0.00417453	0.00295245	ASL/AMT/ARG1/AHCY/AGXT/ASPA/ACAT1	7
GO:0010043	response to zinc ion	6/327	52/16672	0.000517934	0.00417453	0.00295245	PARP1/AANAT/ASS1/ARG1/ALAD/APOBEC1	6
GO:0045428	regulation of nitric oxide biosynthetic process	6/327	52/16672	0.000517934	0.00417453	0.00295245	ACP5/ASS1/AKT1/AIF1/AGT/AGTR2	6
GO:0035812	renal sodium excretion	4/327	20/16672	0.000549075	0.00440665	0.00311662	AGTR1/ADORA1/AGT/AGTR2	4
GO:0035813	regulation of renal sodium excretion	4/327	20/16672	0.000549075	0.00440665	0.00311662	AGTR1/ADORA1/AGT/AGTR2	4
GO:0006805	xenobiotic metabolic process	8/327	95/16672	0.000556109	0.0044536	0.00314983	ACY1/NAT1/AHR/AADAC/AOC1/ALDH3A1/AOC2/NAT2	8
GO:0042542	response to hydrogen peroxide	9/327	119/16672	0.000562441	0.00449454	0.00317878	ABL1/APEX1/ADA/ARG1/ANXA1/AKR1B1/RHOB/AREG/AQP1	9
GO:0002090	regulation of receptor internalization	5/327	35/16672	0.000563609	0.00449454	0.00317878	ARRB2/ANGPT1/ARF1/ARRB1/ANXA2	5
GO:0010633	negative regulation of epithelial cell migration	6/327	53/16672	0.000574555	0.0045625	0.00322685	RHOA/ACVRL1/ANGPT2/APOH/APOE/AGTR2	6
GO:0071384	cellular response to corticosteroid stimulus	6/327	53/16672	0.000574555	0.0045625	0.00322685	ASS1/ARG1/ANXA1/ADCYAP1/AQP1/AGTR2	6
GO:0002791	regulation of peptide secretion	12/327	199/16672	0.000578058	0.00458065	0.00323969	SLC25A6/ARNTL/ADCY5/ABAT/ADRA2C/SLC25A4/ADORA1/ADRA2A/ARRB1/ARL2/SLC25A5/ADCYAP1	12
GO:0051017	actin filament bundle assembly	9/327	120/16672	0.000597776	0.00472695	0.00334316	APOA1/ARHGAP6/RHOA/ARRB1/ACTN1/ACTN4/AIF1/ADD2/ADD1	9
GO:0072593	reactive oxygen species metabolic process	13/327	229/16672	0.000611507	0.0048254	0.00341278	ACP5/ARG2/ASS1/AKT1/BIRC2/AGTR1/AOX1/ALOX12/APOA4/AIF1/AGT/ARF4/AGTR2	13
GO:0006091	generation of precursor metabolites and energy	17/327	352/16672	0.000614439	0.00483839	0.00342197	ACO1/ACTN3/AKT1/ASIP/ACADVL/ACOX1/SLC25A4/ADRB3/AQP7/AKT2/ALDOB/ADSL/ALDOA/ARNT/ACO2/AGL/ALDOC	17
GO:0090087	regulation of peptide transport	12/327	201/16672	0.000631704	0.00496395	0.00351077	SLC25A6/ARNTL/ADCY5/ABAT/ADRA2C/SLC25A4/ADORA1/ADRA2A/ARRB1/ARL2/SLC25A5/ADCYAP1	12
GO:2000117	negative regulation of cysteine-type endopeptidase activity	8/327	97/16672	0.00063926	0.00501286	0.00354537	ARRB2/BIRC5/AKT1/BIRC2/ARRB1/XIAP/BIRC3/AQP1	8
GO:0032941	secretion by tissue	7/327	75/16672	0.00066334	0.00518314	0.0036658	APRT/SERPINC1/ADA/ALOX12B/ADORA1/AQP5/AQP1	7
GO:0044708	single-organism behavior	18/327	387/16672	0.000665152	0.00518314	0.0036658	ARRB2/ABL1/ADCY3/APRT/ASIP/ABAT/AGRP/ADCY1/ADA/ADORA1/ADCY8/ARF4/ASIC1/APP/ADCYAP1/ARCN1/AMFR/AGTR2	18
GO:0002021	response to dietary excess	4/327	21/16672	0.000667859	0.00518314	0.0036658	ADRB1/ADRB3/ADRB2/APOE	4
GO:0045822	negative regulation of heart contraction	4/327	21/16672	0.000667859	0.00518314	0.0036658	ADRA1A/ADORA1/GRK2/AGTR2	4
GO:0046688	response to copper ion	4/327	21/16672	0.000667859	0.00518314	0.0036658	AANAT/AQP2/AOC1/AQP1	4
GO:0006690	icosanoid metabolic process	8/327	98/16672	0.000684443	0.00530091	0.00374909	ACOX1/ALOX12B/ALOX5AP/ALOX12/ALOX15B/ALOX5/ANXA1/ALOX15	8
GO:0071396	cellular response to lipid	21/327	490/16672	0.00070737	0.00546723	0.00386672	ARRB2/ABL1/NR0B1/PARP1/ADCY3/ASS1/ARNTL/ADCY5/AKT1/ADCY1/AR/ABL2/ARG1/ALOX12/ANXA1/ABCA1/ADCYAP1/ADCY6/AQP1/ADCY2/AGTR2	21
GO:0070301	cellular response to hydrogen peroxide	7/327	76/16672	0.000718567	0.00554183	0.00391948	ABL1/APEX1/ARG1/ANXA1/AKR1B1/RHOB/AQP1	7
GO:0043270	positive regulation of ion transport	12/327	204/16672	0.000719966	0.00554183	0.00391948	ARRB2/ABL1/AKT1/ADCYAP1R1/ABAT/ARF1/ACTN2/ADORA1/ADRA2A/ANK3/ANK2/ACTN4	12
GO:0071241	cellular response to inorganic substance	10/327	149/16672	0.000723531	0.0055579	0.00393085	PARP1/ADCY1/ALOX5AP/ANK3/AQP2/AOC1/ALOX15/ALAD/FAS/AQP1	10
GO:0071466	cellular response to xenobiotic stimulus	8/327	99/16672	0.000732165	0.00561277	0.00396966	ACY1/NAT1/AHR/AADAC/AOC1/ALDH3A1/AOC2/NAT2	8
GO:0030072	peptide hormone secretion	13/327	234/16672	0.000747863	0.00572146	0.00404653	SLC25A6/ARNTL/ACVR2B/ADCY5/ABAT/ADRA2C/SLC25A4/ADRA2A/ARRB1/ANXA1/ARL2/SLC25A5/ADCYAP1	13
GO:0008277	regulation of G-protein coupled receptor protein signaling pathway	9/327	124/16672	0.000757775	0.00577381	0.00408355	ARRB2/ADA/ADRB2/ADRA2A/ARRB1/ADM/ADCYAP1/ACPP/GRK2	9
GO:0061572	actin filament bundle organization	9/327	124/16672	0.000757775	0.00577381	0.00408355	APOA1/ARHGAP6/RHOA/ARRB1/ACTN1/ACTN4/AIF1/ADD2/ADD1	9
GO:0010226	response to lithium ion	4/327	22/16672	0.000803752	0.00606052	0.00428633	ADCY1/ASCL1/ACTA1/FAS	4
GO:0010460	positive regulation of heart rate	4/327	22/16672	0.000803752	0.00606052	0.00428633	ADRA1A/ADRB1/ADA/ADM	4
GO:0090181	regulation of cholesterol metabolic process	4/327	22/16672	0.000803752	0.00606052	0.00428633	ACADVL/APOB/ACADL/APOE	4
GO:0002739	regulation of cytokine secretion involved in immune response	3/327	10/16672	0.000809894	0.00606052	0.00428633	APOA1/ANGPT1/APOA2	3
GO:0032429	regulation of phospholipase A2 activity	3/327	10/16672	0.000809894	0.00606052	0.00428633	AGTR1/ANG/ANXA1	3
GO:0040015	negative regulation of multicellular organism growth	3/327	10/16672	0.000809894	0.00606052	0.00428633	ADRB1/ADRB3/ADRB2	3
GO:0046501	protoporphyrinogen IX metabolic process	3/327	10/16672	0.000809894	0.00606052	0.00428633	ALAS2/ALAS1/ALAD	3
GO:0070254	mucus secretion	3/327	10/16672	0.000809894	0.00606052	0.00428633	ADA/ALOX12B/ADORA1	3
GO:1990845	adaptive thermogenesis	3/327	10/16672	0.000809894	0.00606052	0.00428633	ADRB1/ADRB3/ADRB2	3
GO:0061098	positive regulation of protein tyrosine kinase activity	5/327	38/16672	0.000830587	0.00619075	0.00437844	ADRA2B/ADRA2C/ADORA1/ADRA2A/AGT	5
GO:0070169	positive regulation of biomineral tissue development	5/327	38/16672	0.000830587	0.00619075	0.00437844	ACVR2B/ADRB2/ACVR1/AMELX/ACVR2A	5
GO:0043112	receptor metabolic process	10/327	152/16672	0.00084411	0.00627911	0.00444093	ARRB2/ANGPT1/ARF1/ARRB1/ANXA2/ADM/APOE/ACHE/GRK2/GRK3	10
GO:0006909	phagocytosis	13/327	238/16672	0.000874601	0.00649309	0.00459227	ABL1/ACTB/ACTG1/ABR/ADORA2A/AHSG/ADORA1/ANXA1/ANXA11/ABCA1/AIF1/ALOX15/ANXA3	13
GO:0045765	regulation of angiogenesis	12/327	210/16672	0.000927673	0.00687355	0.00486135	RHOA/ACVRL1/ANGPT2/ALOX12/FASLG/APOH/KLK3/AGT/ADM/RHOB/ANXA3/AQP1	12
GO:0034695	response to prostaglandin E	4/327	23/16672	0.00095805	0.00705695	0.00499106	AANAT/AKT1/ACACA/ADCY6	4
GO:0044062	regulation of excretion	4/327	23/16672	0.00095805	0.00705695	0.00499106	AGTR1/ADORA1/AGT/AGTR2	4
GO:0071379	cellular response to prostaglandin stimulus	4/327	23/16672	0.00095805	0.00705695	0.00499106	AKT1/ACACA/APOB/ADCY6	4
GO:0051186	cofactor metabolic process	17/327	368/16672	0.00100449	0.0073846	0.00522279	AMD1/ACTN3/ACLY/ACACA/ALAS2/AMBP/ALDOB/AKR1B1/ALAS1/AHCY/ALDOA/ARNT/ALAD/ACACB/ACAT1/ALDOC/ADH4	17
GO:0045137	development of primary sexual characteristics	12/327	213/16672	0.00104893	0.00769265	0.00544066	ARRB2/NR0B1/ACVR1B/AFP/ADCYAP1R1/AMH/AR/ANG/ARRB1/ADCYAP1/AMHR2/ACVR2A	12
GO:0032924	activin receptor signaling pathway	5/327	40/16672	0.00105457	0.00769265	0.00544066	ACVR1B/ACVR2B/ACVRL1/ACVR1/ACVR2A	5
GO:0045429	positive regulation of nitric oxide biosynthetic process	5/327	40/16672	0.00105457	0.00769265	0.00544066	ASS1/AKT1/AIF1/AGT/AGTR2	5
GO:1904407	positive regulation of nitric oxide metabolic process	5/327	40/16672	0.00105457	0.00769265	0.00544066	ASS1/AKT1/AIF1/AGT/AGTR2	5
GO:0031329	regulation of cellular catabolic process	17/327	370/16672	0.00106558	0.0077579	0.00548681	APAF1/APOA1/ARAF/APOC2/APOC3/AADAC/AKT1/ABCD2/ADAM8/ADRB2/ADRA2A/AKT2/APOA4/ANXA2/ARNT/APOE/ACACB	17
GO:0051955	regulation of amino acid transport	3/327	11/16672	0.00109748	0.00794405	0.00561847	ABAT/ARG1/AGT	3
GO:0060544	regulation of necroptotic process	3/327	11/16672	0.00109748	0.00794405	0.00561847	BIRC2/SLC25A4/BIRC3	3
GO:0060547	negative regulation of necrotic cell death	3/327	11/16672	0.00109748	0.00794405	0.00561847	BIRC2/SLC25A4/BIRC3	3
GO:0032835	glomerulus development	6/327	60/16672	0.00111727	0.00805636	0.0056979	ANGPT1/ANGPT2/AMPD2/JAG1/ACTA2/AGTR2	6
GO:0046889	positive regulation of lipid biosynthetic process	6/327	60/16672	0.00111727	0.00805636	0.0056979	APOA1/APOC2/AKT1/ANXA1/APOA4/APOE	6
GO:0003071	renal system process involved in regulation of systemic arterial blood pressure	4/327	24/16672	0.00113205	0.00808546	0.00571847	AGTR1/ADORA1/AGT/AGTR2	4
GO:0032925	regulation of activin receptor signaling pathway	4/327	24/16672	0.00113205	0.00808546	0.00571847	ACVR1B/ACVR2B/ACVR1/ACVR2A	4
GO:0071549	cellular response to dexamethasone stimulus	4/327	24/16672	0.00113205	0.00808546	0.00571847	ASS1/ARG1/AQP1/AGTR2	4
GO:0072661	protein targeting to plasma membrane	4/327	24/16672	0.00113205	0.00808546	0.00571847	ANK1/ANK3/ANK2/ANXA2	4
GO:2000404	regulation of T cell migration	4/327	24/16672	0.00113205	0.00808546	0.00571847	ADAM10/ADAM8/AIF1/APOD	4
GO:0048608	reproductive structure development	18/327	406/16672	0.0011494	0.00819385	0.00579514	ARRB2/NR0B1/AKT1/AFP/BIRC2/AMH/AR/ADA/ANG/ARRB1/ALOX15B/ANXA1/ASCL2/ADM/ADCYAP1/ARNT/AMHR2/ACVR2A	18
GO:0045806	negative regulation of endocytosis	5/327	41/16672	0.00118201	0.00839447	0.00593702	APOC1/APOC2/APOC3/ARF6/ANXA2	5
GO:0045933	positive regulation of muscle contraction	5/327	41/16672	0.00118201	0.00839447	0.00593702	ADRA1B/ADRA1A/ABAT/ADRA1D/ADA	5
GO:0009141	nucleoside triphosphate metabolic process	14/327	277/16672	0.0011892	0.00842968	0.00596193	AK4/PARP1/ADK/ACTN3/AK2/ADA/AMPD3/ALDOB/ALDOA/ADCYAP1/ARNT/AMPD2/AK1/ALDOC	14
GO:0009410	response to xenobiotic stimulus	8/327	107/16672	0.00121826	0.00861944	0.00609613	ACY1/NAT1/AHR/AADAC/AOC1/ALDH3A1/AOC2/NAT2	8
GO:0048872	homeostasis of number of cells	12/327	218/16672	0.00128021	0.00904071	0.00639408	ABL1/ACVR1B/AKT1/ADA/AMPD3/ALAS2/ANXA1/ARNT/ADAR/FAS/ADD1/ACVR2A	12
GO:0061458	reproductive system development	18/327	410/16672	0.00128282	0.00904219	0.00639512	ARRB2/NR0B1/AKT1/AFP/BIRC2/AMH/AR/ADA/ANG/ARRB1/ALOX15B/ANXA1/ASCL2/ADM/ADCYAP1/ARNT/AMHR2/ACVR2A	18
GO:0030193	regulation of blood coagulation	7/327	84/16672	0.00130325	0.0091349	0.0064607	SERPINC1/ABAT/ALOX12/ASIC2/APOH/ANXA2/APOE	7
GO:1900046	regulation of hemostasis	7/327	84/16672	0.00130325	0.0091349	0.0064607	SERPINC1/ABAT/ALOX12/ASIC2/APOH/ANXA2/APOE	7
GO:1903409	reactive oxygen species biosynthetic process	7/327	84/16672	0.00130325	0.0091349	0.0064607	ACP5/ARG2/ASS1/AKT1/AIF1/AGT/AGTR2	7
GO:0034260	negative regulation of GTPase activity	5/327	42/16672	0.00132048	0.00923846	0.00653394	ARRB2/ARRB1/ARL2/ADCYAP1/RHOH	5
GO:0007202	activation of phospholipase C activity	4/327	25/16672	0.00132705	0.00925002	0.00654212	ADRA1A/ADCYAP1R1/ANG/AGT	4
GO:0032365	intracellular lipid transport	4/327	25/16672	0.00132705	0.00925002	0.00654212	ABCA2/ACACA/ABCA1/ACACB	4
GO:0050663	cytokine secretion	10/327	162/16672	0.00137094	0.00953476	0.0067435	ABL1/APOA1/ANGPT1/ANXA4/ALOX15B/ANXA1/ABCA1/AGT/APOA2/AGTR2	10
GO:0001935	endothelial cell proliferation	8/327	109/16672	0.00137296	0.00953476	0.0067435	APOA1/AKT1/ANG/ARG1/ACVRL1/APOH/ARNT/APOE	8
GO:0051262	protein tetramerization	9/327	135/16672	0.00138451	0.00957957	0.0067752	ASL/ACTN2/ACACA/ACADL/ANXA2/ADSL/ALDOA/ACHE/ACACB	9
GO:0090002	establishment of protein localization to plasma membrane	9/327	135/16672	0.00138451	0.00957957	0.0067752	AKT1/ANK1/AR/ACTN2/ARF6/RHOG/ANK3/ANK2/ANXA2	9
GO:0002031	G-protein coupled receptor internalization	3/327	12/16672	0.00144213	0.00990546	0.00700568	ARRB2/ARRB1/ADM	3
GO:0038166	angiotensin-activated signaling pathway	3/327	12/16672	0.00144213	0.00990546	0.00700568	AGTR1/ACTN2/AGTR2	3
GO:0051775	response to redox state	3/327	12/16672	0.00144213	0.00990546	0.00700568	ARNTL/ARHGDIB/ADH5	3
GO:1904181	positive regulation of membrane depolarization	3/327	12/16672	0.00144213	0.00990546	0.00700568	PARP1/ALOX12/ANK3	3
GO:0002027	regulation of heart rate	7/327	86/16672	0.00149554	0.0102349	0.00723871	ADRA1A/ADRB1/ADA/ANK2/AGT/ADM/AGTR2	7
GO:0006165	nucleoside diphosphate phosphorylation	7/327	86/16672	0.00149554	0.0102349	0.00723871	AK4/ACTN3/ALDOB/ALDOA/ARNT/AK1/ALDOC	7
GO:0051592	response to calcium ion	8/327	111/16672	0.00154289	0.0105306	0.00744781	AANAT/ADCY1/ALOX5AP/AQP3/ANXA11/ALOX15/ANXA7/APOBEC1	8
GO:0032148	activation of protein kinase B activity	4/327	26/16672	0.00154434	0.0105306	0.00744781	ADRA2B/ADRA2C/ANG/ADRA2A	4
GO:0008652	cellular amino acid biosynthetic process	6/327	64/16672	0.00156735	0.0106489	0.0075315	ASNS/ASS1/ASL/ABAT/AGXT/ASPA	6
GO:0061097	regulation of protein tyrosine kinase activity	6/327	64/16672	0.00156735	0.0106489	0.0075315	ADRA2B/ADRA2C/ADORA1/ADRA2A/AGT/APP	6
GO:0071496	cellular response to external stimulus	13/327	254/16672	0.00157631	0.0106905	0.0075609	ASNS/ALB/ASGR1/AKT1/ADORA2B/AES/AQP2/AOC1/AIF1/AGT/ATF3/FAS/AQP1	13
GO:0090276	regulation of peptide hormone secretion	11/327	194/16672	0.00159466	0.0107955	0.00763517	SLC25A6/ARNTL/ADCY5/ABAT/ADRA2C/SLC25A4/ADRA2A/ARRB1/ARL2/SLC25A5/ADCYAP1	11
GO:0048013	ephrin receptor signaling pathway	7/327	87/16672	0.00159963	0.0108097	0.00764519	ACTB/ACTG1/ADAM10/AP2B1/RHOA/AP2A1/AP2A2	7
GO:0046034	ATP metabolic process	12/327	224/16672	0.00161194	0.0108734	0.00769024	AK4/PARP1/ACTN3/AK2/AMPD3/ALDOB/ALDOA/ADCYAP1/ARNT/AMPD2/AK1/ALDOC	12
GO:1903532	positive regulation of secretion by cell	15/327	319/16672	0.001649	0.0111035	0.00785299	ABL1/ABAT/ADORA2B/ARF1/ADAM8/ANG/APBB1/ARRB1/ALOX15B/AGT/ADCYAP1/AP1G1/ACHE/GRK2/AGTR2	15
GO:1903426	regulation of reactive oxygen species biosynthetic process	6/327	65/16672	0.00169878	0.0114069	0.00806757	ACP5/ASS1/AKT1/AIF1/AGT/AGTR2	6
GO:0009896	positive regulation of catabolic process	15/327	320/16672	0.00170012	0.0114069	0.00806757	APOA1/APOC2/AADAC/ACTN3/AKT1/ABCD2/ADAM8/ADRB2/ADRA2A/AKT2/APOA4/APC/ARNT/APOE/APOA2	15
GO:0009895	negative regulation of catabolic process	9/327	140/16672	0.00178201	0.011914	0.00842624	APOC1/APOC3/ACTN3/AKT1/ADORA1/ADRA2A/ANXA2/APOA2/ACACB	9
GO:0010656	negative regulation of muscle cell apoptotic process	4/327	27/16672	0.0017852	0.011914	0.00842624	ARRB2/ALOX12/APOH/ADCYAP1	4
GO:0042454	ribonucleoside catabolic process	4/327	27/16672	0.0017852	0.011914	0.00842624	ADA/AMPD3/AHCY/APOBEC1	4
GO:0050796	regulation of insulin secretion	10/327	168/16672	0.00179839	0.0119808	0.00847346	SLC25A6/ARNTL/ADCY5/ABAT/ADRA2C/SLC25A4/ADRA2A/ARRB1/ARL2/SLC25A5	10
GO:0050710	negative regulation of cytokine secretion	5/327	45/16672	0.0018079	0.0119987	0.00848612	APOA1/ANGPT1/ANXA4/ANXA1/APOA2	5
GO:0051055	negative regulation of lipid biosynthetic process	5/327	45/16672	0.0018079	0.0119987	0.00848612	APOC1/APOC3/ACADVL/ACADL/APOE	5
GO:0051260	protein homooligomerization	13/327	258/16672	0.00181064	0.0119987	0.00848612	APAF1/ACTN2/ALOX5AP/ARG1/ACACA/ANXA6/ACADL/ASIC1/ALDOA/ALAD/ACACB/FAS/ACAT1	13
GO:0002374	cytokine secretion involved in immune response	3/327	13/16672	0.00184768	0.0120741	0.00853944	APOA1/ANGPT1/APOA2	3
GO:0002674	negative regulation of acute inflammatory response	3/327	13/16672	0.00184768	0.0120741	0.00853944	ADORA1/ADCYAP1/APCS	3
GO:0006531	aspartate metabolic process	3/327	13/16672	0.00184768	0.0120741	0.00853944	ASS1/ASPA/ADSS	3
GO:0009437	carnitine metabolic process	3/327	13/16672	0.00184768	0.0120741	0.00853944	ALDH9A1/ACADL/ACADM	3
GO:0033197	response to vitamin E	3/327	13/16672	0.00184768	0.0120741	0.00853944	ADA/ARG1/ALAD	3
GO:0033540	fatty acid beta-oxidation using acyl-CoA oxidase	3/327	13/16672	0.00184768	0.0120741	0.00853944	ABCD1/ACOX1/ACAA1	3
GO:0036109	alpha-linolenic acid metabolic process	3/327	13/16672	0.00184768	0.0120741	0.00853944	ABCD1/ACOX1/ACAA1	3
GO:0072350	tricarboxylic acid metabolic process	3/327	13/16672	0.00184768	0.0120741	0.00853944	ACO1/ACLY/ACO2	3
GO:0030522	intracellular receptor signaling pathway	13/327	260/16672	0.00193819	0.0126217	0.00892676	ARRB2/NR0B1/PARP1/AHR/ARNTL/BIRC2/AR/ALOX15B/ACTN4/ALOX15/ARNT/XIAP/BIRC3	13
GO:0051604	protein maturation	13/327	260/16672	0.00193819	0.0126217	0.00892676	PARP1/AEBP1/BIRC5/BIRC2/ADAM10/ADAM8/APOH/ASPH/A2M/AGT/XIAP/AGA/BIRC3	13
GO:0006643	membrane lipid metabolic process	11/327	199/16672	0.00195027	0.0126566	0.00895141	ARSA/ALDH3A2/ALOX12B/ARSD/ARSE/ARSB/ARSF/ASAH1/ALDH3B1/STS/ALDH3B2	11
GO:0032846	positive regulation of homeostatic process	11/327	199/16672	0.00195027	0.0126566	0.00895141	ABL1/ACVR1B/ADCYAP1R1/ABAT/ADAM8/ARRB1/ANXA1/AGT/ARNT/ACVR2A/AGTR2	11
GO:0070265	necrotic cell death	5/327	46/16672	0.0019963	0.012933	0.00914693	BIRC2/SLC25A4/FASLG/FAS/BIRC3	5
GO:0002026	regulation of the force of heart contraction	4/327	28/16672	0.00205092	0.0132186	0.00934891	ADRA1A/ADRB1/ADM/GRK2	4
GO:0071868	cellular response to monoamine stimulus	4/327	28/16672	0.00205092	0.0132186	0.00934891	ABL1/APP/ADCY6/APLP1	4
GO:0071870	cellular response to catecholamine stimulus	4/327	28/16672	0.00205092	0.0132186	0.00934891	ABL1/APP/ADCY6/APLP1	4
GO:0007043	cell-cell junction assembly	7/327	91/16672	0.00207349	0.0133185	0.00941955	RHOA/RHOC/ARL2/ANK2/ACTN4/AGT/APC	7
GO:0008585	female gonad development	7/327	91/16672	0.00207349	0.0133185	0.00941955	ARRB2/AFP/AMH/ANG/ARRB1/ADCYAP1/AMHR2	7
GO:1901342	regulation of vasculature development	12/327	232/16672	0.00216145	0.0138598	0.00980239	RHOA/ACVRL1/ANGPT2/ALOX12/FASLG/APOH/KLK3/AGT/ADM/RHOB/ANXA3/AQP1	12
GO:0030195	negative regulation of blood coagulation	5/327	47/16672	0.00219866	0.0139793	0.00988692	ABAT/ALOX12/APOH/ANXA2/APOE	5
GO:0031102	neuron projection regeneration	5/327	47/16672	0.00219866	0.0139793	0.00988692	APOA1/APOA4/ADM/APOD/APOE	5
GO:0070231	T cell apoptotic process	5/327	47/16672	0.00219866	0.0139793	0.00988692	AKT1/ADA/ADAM8/FASLG/FAS	5
GO:1900047	negative regulation of hemostasis	5/327	47/16672	0.00219866	0.0139793	0.00988692	ABAT/ALOX12/APOH/ANXA2/APOE	5
GO:1903428	positive regulation of reactive oxygen species biosynthetic process	5/327	47/16672	0.00219866	0.0139793	0.00988692	ASS1/AKT1/AIF1/AGT/AGTR2	5
GO:0016485	protein processing	12/327	233/16672	0.00223979	0.0142168	0.0100549	PARP1/AEBP1/BIRC5/BIRC2/ADAM10/ADAM8/APOH/ASPH/A2M/AGT/XIAP/BIRC3	12
GO:0002683	negative regulation of immune system process	16/327	363/16672	0.00225684	0.0142769	0.0100974	ARRB2/APOA1/ANGPT1/ABR/ADA/ADORA1/AMBP/ANXA1/A2M/ALOX15/ADCYAP1/APOD/APOA2/ADAR/FAS/APCS	16
GO:0043900	regulation of multi-organism process	16/327	363/16672	0.00225684	0.0142769	0.0100974	ACVR1B/ARHGDIB/ADARB1/BIRC2/ARF1/ADA/AP2B1/CRISP1/AP2A1/AP1B1/APOE/AP1G1/ADAR/AP2A2/BIRC3/APCS	16
GO:0001894	tissue homeostasis	11/327	203/16672	0.00227909	0.0143934	0.0101798	ACP5/ALB/ACTB/ACTG1/ADAM8/ACACA/ABCA4/ADRB2/AKR1B1/SERPINA3/ADD1	11
GO:0007045	cell-substrate adherens junction assembly	6/327	69/16672	0.00230979	0.014443	0.0102149	ARHGAP6/ACTN3/ACTN2/ACVRL1/ACTN1/APOD	6
GO:0048041	focal adhesion assembly	6/327	69/16672	0.00230979	0.014443	0.0102149	ARHGAP6/ACTN3/ACTN2/ACVRL1/ACTN1/APOD	6
GO:0010984	regulation of lipoprotein particle clearance	3/327	14/16672	0.00231764	0.014443	0.0102149	APOC1/APOC2/APOC3	3
GO:0030299	intestinal cholesterol absorption	3/327	14/16672	0.00231764	0.014443	0.0102149	APOA1/APOA4/APOA2	3
GO:0032691	negative regulation of interleukin-1 beta production	3/327	14/16672	0.00231764	0.014443	0.0102149	ACP5/ARRB2/APOA1	3
GO:0032717	negative regulation of interleukin-8 production	3/327	14/16672	0.00231764	0.014443	0.0102149	ANXA4/ARRB1/ANXA1	3
GO:0060712	spongiotrophoblast layer development	3/327	14/16672	0.00231764	0.014443	0.0102149	AKT1/ASCL2/ADM	3
GO:0098856	intestinal lipid absorption	3/327	14/16672	0.00231764	0.014443	0.0102149	APOA1/APOA4/APOA2	3
GO:0042168	heme metabolic process	4/327	29/16672	0.00234275	0.0145467	0.0102882	ALAS2/AMBP/ALAS1/ALAD	4
GO:0042572	retinol metabolic process	4/327	29/16672	0.00234275	0.0145467	0.0102882	ADH7/ALDH1A1/ALDH1A3/ADH4	4
GO:0001936	regulation of endothelial cell proliferation	7/327	93/16672	0.0023478	0.0145467	0.0102882	AKT1/ANG/ARG1/ACVRL1/APOH/ARNT/APOE	7
GO:0032496	response to lipopolysaccharide	14/327	298/16672	0.00234973	0.0145467	0.0102882	ACP5/ABL1/ASS1/AKT1/ABR/ARG1/ADH5/FASLG/ABCA1/APOB/ADM/ALAD/FAS/ALPL	14
GO:0006941	striated muscle contraction	9/327	146/16672	0.00237435	0.014675	0.0103789	ADRA1B/ARG2/ADRA1A/ACTN3/ADORA1/ACTC1/ANK2/ALDOA/GRK2	9
GO:0010469	regulation of receptor activity	8/327	119/16672	0.00239601	0.0147845	0.0104564	ADRA2B/ACTN2/ADRA2C/ADORA1/ADRA2A/ANXA2/APP/AGER	8
GO:0009064	glutamine family amino acid metabolic process	6/327	70/16672	0.00248551	0.0152941	0.0108168	ASNS/ART4/ARG2/ASS1/ASL/ARG1	6
GO:2000377	regulation of reactive oxygen species metabolic process	9/327	147/16672	0.00248672	0.0152941	0.0108168	ACP5/ASS1/AKT1/BIRC2/AGTR1/AIF1/AGT/ARF4/AGTR2	9
GO:0002698	negative regulation of immune effector process	7/327	95/16672	0.00264926	0.0162673	0.0115051	ARRB2/APOA1/ANGPT1/ABR/ANXA1/A2M/APOA2	7
GO:0010039	response to iron ion	4/327	30/16672	0.00266193	0.0163184	0.0115413	ACO1/ABAT/APBB1/ALAD	4
GO:0006874	cellular calcium ion homeostasis	16/327	370/16672	0.0027277	0.0166944	0.0118072	ADRA1B/ABL1/ADRA1A/ADCY5/ADCYAP1R1/ADRA1D/AGTR1/ABL2/ANXA6/ANK2/AGT/ADM/APP/ADCYAP1/APOE/ANXA7	16
GO:0001889	liver development	8/327	122/16672	0.00279747	0.017066	0.01207	AK4/ASNS/ASS1/ADA/ARG1/ARF6/ANXA1/ACAT1	8
GO:0002262	myeloid cell homeostasis	8/327	122/16672	0.00279747	0.017066	0.01207	ACVR1B/AMPD3/ALAS2/ANXA1/ARNT/ADAR/ADD1/ACVR2A	8
GO:0022037	metencephalon development	7/327	96/16672	0.00281072	0.017119	0.0121075	ABL1/ABAT/AARS/PHOX2A/ASCL1/ARCN1/AGTR2	7
GO:0034390	smooth muscle cell apoptotic process	3/327	15/16672	0.00285526	0.0171686	0.0121426	ARRB2/ARRB1/APOH	3
GO:0034391	regulation of smooth muscle cell apoptotic process	3/327	15/16672	0.00285526	0.0171686	0.0121426	ARRB2/ARRB1/APOH	3
GO:0035930	corticosteroid hormone secretion	3/327	15/16672	0.00285526	0.0171686	0.0121426	AGTR1/AGT/AGTR2	3
GO:0051044	positive regulation of membrane protein ectodomain proteolysis	3/327	15/16672	0.00285526	0.0171686	0.0121426	ADAM8/ADRA2A/APOE	3
GO:0051895	negative regulation of focal adhesion assembly	3/327	15/16672	0.00285526	0.0171686	0.0121426	ARHGAP6/ACVRL1/APOD	3
GO:0061154	endothelial tube morphogenesis	3/327	15/16672	0.00285526	0.0171686	0.0121426	RHOA/ACVRL1/RHOB	3
GO:2000846	regulation of corticosteroid hormone secretion	3/327	15/16672	0.00285526	0.0171686	0.0121426	AGTR1/AGT/AGTR2	3
GO:0051402	neuron apoptotic process	11/327	209/16672	0.00285535	0.0171686	0.0121426	ABL1/PARP1/APAF1/ANGPT1/AARS/ADAM8/FASLG/APP/APOE/ASCL1/FAS	11
GO:0016525	negative regulation of angiogenesis	6/327	72/16672	0.00286686	0.0172103	0.0121721	RHOA/ANGPT2/FASLG/APOH/KLK3/AGT	6
GO:0006695	cholesterol biosynthetic process	5/327	50/16672	0.00289534	0.0173536	0.0122734	APOA1/ACLY/APOA4/APOB/APOE	5
GO:0006007	glucose catabolic process	4/327	31/16672	0.00300969	0.0179248	0.0126774	ACTN3/ALDOB/ALDOA/ALDOC	4
GO:0071548	response to dexamethasone	4/327	31/16672	0.00300969	0.0179248	0.0126774	ASS1/ARG1/AQP1/AGTR2	4
GO:0071867	response to monoamine	4/327	31/16672	0.00300969	0.0179248	0.0126774	ABL1/APP/ADCY6/APLP1	4
GO:0071869	response to catecholamine	4/327	31/16672	0.00300969	0.0179248	0.0126774	ABL1/APP/ADCY6/APLP1	4
GO:0043266	regulation of potassium ion transport	6/327	73/16672	0.00307318	0.0182593	0.012914	ACTN2/ADORA1/ADRA2A/ANK3/ANK2/ADCYAP1	6
GO:0010959	regulation of metal ion transport	14/327	307/16672	0.00307555	0.0182593	0.012914	ARRB2/ABL1/AKT1/ADCYAP1R1/ARF1/ACTN2/ADORA1/ADRB2/ADRA2A/ANK3/ANK2/ACTN4/AGT/ADCYAP1	14
GO:0007200	phospholipase C-activating G-protein coupled receptor signaling pathway	7/327	98/16672	0.00315616	0.0186689	0.0132036	ADRA1B/ADRA1A/ADRA1D/AGTR1/ACTN2/ADRA2A/AGT	7
GO:0010812	negative regulation of cell-substrate adhesion	5/327	51/16672	0.00315942	0.0186689	0.0132036	ARHGAP6/ACVRL1/ANGPT2/ACTN4/APOD	5
GO:1902653	secondary alcohol biosynthetic process	5/327	51/16672	0.00315942	0.0186689	0.0132036	APOA1/ACLY/APOA4/APOB/APOE	5
GO:0040017	positive regulation of locomotion	17/327	411/16672	0.00321512	0.0189682	0.0134154	ACVR1B/ANGPT1/AKT1/ADAM10/ADAM8/ADRA2A/ALOX12/AKT2/ACTN4/AIF1/AGT/APC/AAMP/RHOB/ANXA3/AGER/ACVR1	17
GO:0061008	hepaticobiliary system development	8/327	125/16672	0.00324961	0.0191417	0.013538	AK4/ASNS/ASS1/ADA/ARG1/ARF6/ANXA1/ACAT1	8
GO:2000181	negative regulation of blood vessel morphogenesis	6/327	74/16672	0.00329039	0.0193516	0.0136865	RHOA/ANGPT2/FASLG/APOH/KLK3/AGT	6
GO:0030282	bone mineralization	7/327	99/16672	0.00334059	0.0196162	0.0138736	ASGR2/ACVR2B/AHSG/ADRB2/ALOX15/ACVR1/ACVR2A	7
GO:2000249	regulation of actin cytoskeleton reorganization	4/327	32/16672	0.00338724	0.0198591	0.0140455	ABL1/ARHGDIB/ABL2/ARHGDIA	4
GO:0002237	response to molecule of bacterial origin	14/327	311/16672	0.00345247	0.0200565	0.014185	ACP5/ABL1/ASS1/AKT1/ABR/ARG1/ADH5/FASLG/ABCA1/APOB/ADM/ALAD/FAS/ALPL	14
GO:0006152	purine nucleoside catabolic process	3/327	16/16672	0.00346352	0.0200565	0.014185	ADA/AMPD3/AHCY	3
GO:0010544	negative regulation of platelet activation	3/327	16/16672	0.00346352	0.0200565	0.014185	ABAT/ALOX12/APOE	3
GO:0046130	purine ribonucleoside catabolic process	3/327	16/16672	0.00346352	0.0200565	0.014185	ADA/AMPD3/AHCY	3
GO:0055070	copper ion homeostasis	3/327	16/16672	0.00346352	0.0200565	0.014185	ARF1/APP/XIAP	3
GO:0071380	cellular response to prostaglandin E stimulus	3/327	16/16672	0.00346352	0.0200565	0.014185	AKT1/ACACA/ADCY6	3
GO:1903392	negative regulation of adherens junction organization	3/327	16/16672	0.00346352	0.0200565	0.014185	ARHGAP6/ACVRL1/APOD	3
GO:1904385	cellular response to angiotensin	3/327	16/16672	0.00346352	0.0200565	0.014185	AGTR1/ACTN2/AGTR2	3
GO:0072507	divalent inorganic cation homeostasis	17/327	415/16672	0.00354545	0.0204994	0.0144983	ADRA1B/ABL1/ADRA1A/ADCY5/ADCYAP1R1/ADRA1D/AGTR1/ABL2/ANXA6/ANK3/ANK2/AGT/ADM/APP/ADCYAP1/APOE/ANXA7	17
GO:0030879	mammary gland development	8/327	127/16672	0.00358124	0.0206745	0.0146221	APRT/AKT1/SERPINC1/AR/ARG1/AKT2/ARHGAP5/AREG	8
GO:0009205	purine ribonucleoside triphosphate metabolic process	12/327	247/16672	0.00360234	0.0207645	0.0146858	AK4/PARP1/ACTN3/AK2/AMPD3/ALDOB/ALDOA/ADCYAP1/ARNT/AMPD2/AK1/ALDOC	12
GO:0019320	hexose catabolic process	5/327	53/16672	0.00373896	0.021519	0.0152194	ACTN3/ALDH1A1/ALDOB/ALDOA/ALDOC	5
GO:0034614	cellular response to reactive oxygen species	8/327	128/16672	0.00375658	0.0215424	0.015236	ABL1/APEX1/ARG1/ANXA1/AKR1B1/APOA4/RHOB/AQP1	8
GO:0070167	regulation of biomineral tissue development	6/327	76/16672	0.00375885	0.0215424	0.015236	ACVR2B/AHSG/ADRB2/ACVR1/AMELX/ACVR2A	6
GO:0007626	locomotory behavior	10/327	186/16672	0.0037602	0.0215424	0.015236	ARRB2/ADCY5/ABAT/ASTN1/APBA1/ALDH1A3/APP/ZFHX3/APBA2/ARCN1	10
GO:0002686	negative regulation of leukocyte migration	4/327	33/16672	0.00379576	0.0216146	0.015287	ABR/ADA/ADORA1/APOD	4
GO:0043268	positive regulation of potassium ion transport	4/327	33/16672	0.00379576	0.0216146	0.015287	ACTN2/ADORA1/ADRA2A/ANK2	4
GO:0044058	regulation of digestive system process	4/327	33/16672	0.00379576	0.0216146	0.015287	APOA1/APOA4/APOA2/AQP1	4
GO:0098801	regulation of renal system process	4/327	33/16672	0.00379576	0.0216146	0.015287	AGTR1/ADORA1/AGT/AGTR2	4
GO:0055074	calcium ion homeostasis	16/327	383/16672	0.00381862	0.0217119	0.0153559	ADRA1B/ABL1/ADRA1A/ADCY5/ADCYAP1R1/ADRA1D/AGTR1/ABL2/ANXA6/ANK2/AGT/ADM/APP/ADCYAP1/APOE/ANXA7	16
GO:0060047	heart contraction	12/327	249/16672	0.0038424	0.0218142	0.0154282	ADRA1B/ADRA1A/ADRB1/ADA/ADORA1/ACTC1/ANK2/ASPH/AGT/ADM/GRK2/AGTR2	12
GO:0008154	actin polymerization or depolymerization	10/327	187/16672	0.00390554	0.0221393	0.0156581	ABL1/ARHGAP6/ARF1/ACTN2/ANG/ARF6/AIF1/ALOX15/ADD2/ADD1	10
GO:0046165	alcohol biosynthetic process	7/327	102/16672	0.00394345	0.0223205	0.0157863	APOA1/ADCYAP1R1/ACLY/AKR1B1/APOA4/APOB/APOE	7
GO:0060840	artery development	6/327	77/16672	0.0040108	0.0226613	0.0160273	ACVR2B/AP2B1/ACVRL1/APOB/JAG1/APOE	6
GO:0032956	regulation of actin cytoskeleton organization	13/327	283/16672	0.00401569	0.0226613	0.0160273	ABL1/APOA1/ARHGAP6/ARHGDIB/ARF1/ACTN2/RHOA/ABL2/ARF6/ARHGDIA/ALOX15/ADD2/ADD1	13
GO:0046578	regulation of Ras protein signal transduction	10/327	188/16672	0.0040553	0.0228181	0.0161382	APOA1/ADRA1A/APOC3/ARHGDIB/ABR/ARRB1/ARF6/ARHGDIA/ABCA1/APOE	10
GO:0001541	ovarian follicle development	5/327	54/16672	0.0040556	0.0228181	0.0161382	ARRB2/AMH/ANG/ARRB1/ADCYAP1	5
GO:0032970	regulation of actin filament-based process	14/327	317/16672	0.00408795	0.0229657	0.0162426	ABL1/APOA1/ARHGAP6/ARHGDIB/ARF1/ACTN2/RHOA/ABL2/ARF6/ANK2/ARHGDIA/ALOX15/ADD2/ADD1	14
GO:0007204	positive regulation of cytosolic calcium ion concentration	12/327	251/16672	0.00409519	0.0229721	0.0162471	ADRA1B/ABL1/ADRA1A/ADCY5/ADCYAP1R1/ADRA1D/AGTR1/ABL2/ANK2/AGT/ADM/ADCYAP1	12
GO:0030335	positive regulation of cell migration	16/327	386/16672	0.00411561	0.0230523	0.0163039	ACVR1B/ANGPT1/AKT1/ADAM10/ADAM8/ADRA2A/ALOX12/AKT2/ACTN4/AIF1/AGT/APC/AAMP/RHOB/ANXA3/ACVR1	16
GO:0002831	regulation of response to biotic stimulus	8/327	130/16672	0.00412713	0.0230825	0.0163252	BIRC2/ARF1/AP2B1/AP2A1/AP1B1/AP1G1/AP2A2/BIRC3	8
GO:0006577	amino-acid betaine metabolic process	3/327	17/16672	0.00414516	0.0231489	0.0163722	ALDH9A1/ACADL/ACADM	3
GO:0010634	positive regulation of epithelial cell migration	7/327	103/16672	0.00416168	0.0231725	0.0163888	ANGPT1/AKT1/ALOX12/AGT/AAMP/RHOB/ANXA3	7
GO:0034101	erythrocyte homeostasis	7/327	103/16672	0.00416168	0.0231725	0.0163888	ACVR1B/AMPD3/ALAS2/ARNT/ADAR/ADD1/ACVR2A	7
GO:0016051	carbohydrate biosynthetic process	10/327	189/16672	0.00420957	0.023381	0.0165363	AKT1/ADCYAP1R1/AP2A1/AKT2/ALDOB/AKR1B1/ALDOA/ATF3/AGL/ALDOC	10
[truncated: 145 more rows]

## Sheet: Sheet5
Enriched GO terms of down-regulted common DEGs
[truncated: 646 more rows]

## Sheet: Sheet6
Enriched GO terms of down-regulted DEGs of PP-MS
[truncated: 619 more rows]

[truncated: 7 more sheets: Sheet7, Sheet8, Sheet9, Sheet10, Sheet11, Sheet12, Sheet13]
