# Supplementary material for: Identification of key genes associated with multiple sclerosis based on gene expression data from peripheral blood mononuclear cells
Source: PeerJ. 2020 Feb 3;8:e8357. doi: 10.7717/peerj.8357 (PMC7003695; doi:10.7717/peerj.8357)
Supplement: Table S3 [file peerj-08-8357-s007.xlsx]

## Sheet: Sheet1
		Attributes of network nodes
#node1	node2	node1_string_internal_id	node2_string_internal_id	node1_external_id	node2_external_id	neighborhood_on_chromosome	gene_fusion	phylogenetic_cooccurrence	homology	coexpression	experimentally_determined_interaction	database_annotated	automated_textmining	combined_score
JUN	FOS	1855436	1848822	9606.ENSP00000360266	9606.ENSP00000306245	0	0	0	0	0.522	0.952	0.9	0.99	0.999
PRKACB	PRKAR1A	1855328	1853711	9606.ENSP00000359719	9606.ENSP00000351410	0	0.019	0	0	0.681	0.923	0.9	0.755	0.999
JUN	FOSB	1855436	1843783	9606.ENSP00000360266	9606.ENSP00000245919	0	0	0	0	0.573	0.646	0.9	0.895	0.998
TP53	CDKN1A	1846083	1843736	9606.ENSP00000269305	9606.ENSP00000244741	0	0	0	0	0	0.574	0.9	0.963	0.998
JUN	ATF3	1855436	1852803	9606.ENSP00000360266	9606.ENSP00000344352	0	0	0	0	0.478	0.848	0.9	0.818	0.998
EAF1	ELL2	1858427	1843472	9606.ENSP00000380054	9606.ENSP00000237853	0	0	0	0	0.056	0.774	0.9	0.876	0.997
JUN	FOSL2	1855436	1845606	9606.ENSP00000360266	9606.ENSP00000264716	0	0	0	0	0.096	0.848	0.9	0.844	0.997
IL1R2	IL1B	1851300	1845335	9606.ENSP00000330959	9606.ENSP00000263341	0	0	0	0	0.058	0.866	0.9	0.726	0.996
TP53	RB1	1846083	1845924	9606.ENSP00000269305	9606.ENSP00000267163	0	0	0	0	0	0.325	0.9	0.951	0.996
VEGFA	HIF1A	1855611	1852062	9606.ENSP00000361125	9606.ENSP00000338018	0	0	0	0	0.049	0.36	0.9	0.942	0.996
JUN	TP53	1855436	1846083	9606.ENSP00000360266	9606.ENSP00000269305	0	0	0	0	0	0.13	0.9	0.919	0.992
VEGFA	THBS1	1855611	1844779	9606.ENSP00000361125	9606.ENSP00000260356	0	0	0	0	0.052	0.36	0.9	0.879	0.991
JUN	IL8	1855436	1848852	9606.ENSP00000360266	9606.ENSP00000306512	0	0	0	0	0.091	0.285	0.9	0.866	0.99
HIF1A	TP53	1852062	1846083	9606.ENSP00000338018	9606.ENSP00000269305	0	0	0	0	0.042	0.36	0.9	0.845	0.989
RB1	CDKN1A	1845924	1843736	9606.ENSP00000267163	9606.ENSP00000244741	0	0	0	0	0	0.336	0.9	0.827	0.987
TP53	MSH2	1846083	1843341	9606.ENSP00000269305	9606.ENSP00000233146	0	0	0	0	0	0.36	0.9	0.825	0.987
FOS	TP53	1848822	1846083	9606.ENSP00000306245	9606.ENSP00000269305	0	0	0	0	0	0	0.9	0.867	0.986
VEGFA	JUN	1855611	1855436	9606.ENSP00000361125	9606.ENSP00000360266	0	0	0	0	0	0.119	0.9	0.861	0.986
FOS	CREM	1848822	1845738	9606.ENSP00000306245	9606.ENSP00000265372	0	0	0	0	0.051	0.398	0.9	0.796	0.986
IL8	IL1B	1848852	1845335	9606.ENSP00000306512	9606.ENSP00000263341	0	0	0	0	0.609	0	0	0.964	0.985
XAF1	OAS2	1854224	1852576	9606.ENSP00000354822	9606.ENSP00000342278	0	0	0	0	0.816	0	0.9	0.276	0.985
PMAIP1	TP53	1850799	1846083	9606.ENSP00000326119	9606.ENSP00000269305	0	0	0	0	0	0.097	0.9	0.846	0.984
JUN	CDKN1A	1855436	1843736	9606.ENSP00000360266	9606.ENSP00000244741	0	0	0	0	0	0.324	0.9	0.791	0.984
JUN	PTGS2	1855436	1854602	9606.ENSP00000360266	9606.ENSP00000356438	0	0	0	0	0	0	0.9	0.847	0.984
PTGS2	FOS	1854602	1848822	9606.ENSP00000356438	9606.ENSP00000306245	0	0	0	0	0.127	0	0.9	0.811	0.982
JUN	HIF1A	1855436	1852062	9606.ENSP00000360266	9606.ENSP00000338018	0	0	0	0	0	0.36	0.9	0.736	0.981
IL8	FOS	1848852	1848822	9606.ENSP00000306512	9606.ENSP00000306245	0	0	0	0	0.089	0	0.9	0.811	0.981
ATF3	TP53	1852803	1846083	9606.ENSP00000344352	9606.ENSP00000269305	0	0	0	0	0	0.36	0.9	0.73	0.981
ATG4C	GABARAPL1	1850418	1845870	9606.ENSP00000322159	9606.ENSP00000266458	0	0	0	0	0.124	0.513	0.9	0.612	0.981
MRPS31	MRPS28	1849784	1846503	9606.ENSP00000315397	9606.ENSP00000276585	0	0	0	0	0.137	0.791	0.9	0.053	0.98
CCL20	IL8	1853751	1848852	9606.ENSP00000351671	9606.ENSP00000306512	0	0	0	0	0.362	0	0.9	0.703	0.979
TIMMDC1	NDUFAF1	1861381	1844780	9606.ENSP00000418803	9606.ENSP00000260361	0	0	0	0	0.056	0.774	0.9	0.165	0.979
OAS1	XAF1	1859322	1854224	9606.ENSP00000388001	9606.ENSP00000354822	0	0	0	0	0.745	0	0.9	0.244	0.979
FOS	FOSB	1848822	1843783	9606.ENSP00000306245	9606.ENSP00000245919	0	0	0	0.825	0.864	0.152	0.8	0.917	0.979
TIMMDC1	NDUFA8	1861381	1855985	9606.ENSP00000418803	9606.ENSP00000362873	0	0	0	0	0.063	0.774	0.9	0.152	0.979
PLK3	TP53	1855637	1846083	9606.ENSP00000361275	9606.ENSP00000269305	0	0	0	0	0	0.36	0.9	0.691	0.978
CCR2	CCL3	1847341	1843010	9606.ENSP00000292301	9606.ENSP00000225245	0	0	0	0	0.057	0.145	0.8	0.875	0.977
ECHDC1	ACADM	1862038	1860801	9606.ENSP00000436585	9606.ENSP00000409612	0.309	0	0	0	0.338	0.07	0.941	0.254	0.977
CXCL2	IL8	1861702	1848852	9606.ENSP00000427279	9606.ENSP00000306512	0	0	0	0.875	0.764	0	0.9	0.725	0.977
DDIT3	ATF3	1862449	1852803	9606.ENSP00000447803	9606.ENSP00000344352	0	0	0	0	0.116	0.628	0.72	0.771	0.976
JUN	RB1	1855436	1845924	9606.ENSP00000360266	9606.ENSP00000267163	0	0	0	0	0	0.36	0.9	0.665	0.976
GABARAPL3	ATG4C	1859764	1850418	9606.ENSP00000394008	9606.ENSP00000322159	0	0	0	0	0.124	0.513	0.9	0.504	0.976
JUN	IFNG	1855436	1843180	9606.ENSP00000360266	9606.ENSP00000229135	0	0	0	0	0	0	0.9	0.756	0.974
SMAD7	PPP1R15A	1845078	1842391	9606.ENSP00000262158	9606.ENSP00000200453	0	0	0	0	0	0.36	0.9	0.617	0.973
JUN	CREM	1855436	1845738	9606.ENSP00000360266	9606.ENSP00000265372	0	0	0	0	0	0.139	0.9	0.695	0.971
PLAUR	SERPINB2	1852201	1848072	9606.ENSP00000339328	9606.ENSP00000299502	0	0	0	0	0.086	0	0.9	0.703	0.97
IL8	CCR2	1848852	1847341	9606.ENSP00000306512	9606.ENSP00000292301	0	0	0	0	0.065	0	0.9	0.709	0.97
CXCL2	CCL20	1861702	1853751	9606.ENSP00000427279	9606.ENSP00000351671	0	0	0	0	0.267	0	0.9	0.63	0.97
CXCL2	CCR2	1861702	1847341	9606.ENSP00000427279	9606.ENSP00000292301	0	0	0	0	0.052	0	0.9	0.714	0.97
JUN	MEF2C	1855436	1852378	9606.ENSP00000360266	9606.ENSP00000340874	0	0	0	0	0	0.133	0.9	0.672	0.969
RPA2	PARP1	1856012	1854450	9606.ENSP00000363021	9606.ENSP00000355759	0	0	0	0	0.177	0.523	0.9	0.289	0.968
NLRP3	IL1B	1851990	1845335	9606.ENSP00000337383	9606.ENSP00000263341	0	0	0	0	0.188	0	0.8	0.821	0.968
JUN	NFKBIA	1855436	1842621	9606.ENSP00000360266	9606.ENSP00000216797	0	0	0	0	0.134	0.054	0.9	0.639	0.966
GBP1	OAS2	1855263	1852576	9606.ENSP00000359504	9606.ENSP00000342278	0	0	0	0	0.455	0	0.9	0.441	0.966
JUN	IL1B	1855436	1845335	9606.ENSP00000360266	9606.ENSP00000263341	0	0	0	0	0.054	0	0.8	0.831	0.965
CCL20	CXCL3	1853751	1847662	9606.ENSP00000351671	9606.ENSP00000296026	0	0	0	0	0.258	0	0.9	0.574	0.965
HSPA1A	RANBP2	1856351	1846837	9606.ENSP00000364802	9606.ENSP00000283195	0	0	0	0	0.102	0.292	0.9	0.504	0.964
OAS1	GBP1	1859322	1855263	9606.ENSP00000388001	9606.ENSP00000359504	0	0	0	0	0.415	0	0.9	0.439	0.964
JUN	PLAUR	1855436	1852201	9606.ENSP00000360266	9606.ENSP00000339328	0	0	0	0	0.053	0	0.9	0.641	0.963
CXCL2	CXCL3	1861702	1847662	9606.ENSP00000427279	9606.ENSP00000296026	0	0	0	0.976	0.643	0	0.9	0.759	0.963
HIF1A	CDKN1A	1852062	1843736	9606.ENSP00000338018	9606.ENSP00000244741	0	0	0	0	0	0	0.9	0.639	0.962
NLRC4	NLRP3	1854083	1851990	9606.ENSP00000354159	9606.ENSP00000337383	0	0	0	0	0.171	0.336	0.72	0.783	0.962
EREG	HBEGF	1843742	1843270	9606.ENSP00000244869	9606.ENSP00000230990	0	0	0	0	0.054	0	0.9	0.64	0.962
PLK2	TP53	1846372	1846083	9606.ENSP00000274289	9606.ENSP00000269305	0	0	0	0	0	0	0.9	0.63	0.961
DDIT4	TP53	1848949	1846083	9606.ENSP00000307305	9606.ENSP00000269305	0	0	0	0	0	0	0.9	0.629	0.961
HIF1A	ADM	1852062	1846549	9606.ENSP00000338018	9606.ENSP00000278175	0	0	0	0	0	0	0.9	0.619	0.96
FOS	IL1B	1848822	1845335	9606.ENSP00000306245	9606.ENSP00000263341	0	0	0	0	0.055	0	0.8	0.807	0.96
DYNC1I2	DYNLL1	1858457	1843632	9606.ENSP00000380308	9606.ENSP00000242577	0	0	0	0	0.122	0.202	0.9	0.504	0.96
CARD6	RIPK2	1844314	1842798	9606.ENSP00000254691	9606.ENSP00000220751	0	0	0	0	0	0.36	0.8	0.712	0.96
JUN	ATF1	1855436	1845050	9606.ENSP00000360266	9606.ENSP00000262053	0	0	0	0	0	0.374	0.9	0.399	0.959
RPA2	TP53	1856012	1846083	9606.ENSP00000363021	9606.ENSP00000269305	0	0	0	0	0	0.36	0.9	0.414	0.959
CCL20	CCR2	1853751	1847341	9606.ENSP00000351671	9606.ENSP00000292301	0	0	0	0	0	0.094	0.9	0.577	0.958
PRKACB	PDE4B	1855328	1851429	9606.ENSP00000359719	9606.ENSP00000332116	0	0	0	0	0.205	0.142	0.9	0.453	0.957
RGCC	TP53	1857014	1846083	9606.ENSP00000368664	9606.ENSP00000269305	0	0	0	0	0	0	0.9	0.571	0.955
IL8	HBEGF	1848852	1843270	9606.ENSP00000306512	9606.ENSP00000230990	0	0	0	0	0.159	0	0.9	0.48	0.952
PTGS2	IL1B	1854602	1845335	9606.ENSP00000356438	9606.ENSP00000263341	0	0	0	0	0.422	0	0	0.917	0.95
ATF3	IFNG	1852803	1843180	9606.ENSP00000344352	9606.ENSP00000229135	0	0	0	0	0.051	0	0.9	0.507	0.949
HIST1H1C	TP53	1852230	1846083	9606.ENSP00000339566	9606.ENSP00000269305	0	0	0	0	0	0	0.9	0.506	0.948
NLRC4	TP53	1854083	1846083	9606.ENSP00000354159	9606.ENSP00000269305	0	0	0	0	0	0	0.9	0.504	0.948
RANBP2	NXT1	1846837	1844345	9606.ENSP00000283195	9606.ENSP00000254998	0	0	0	0	0.073	0.293	0.9	0.308	0.948
FOS	IFNG	1848822	1843180	9606.ENSP00000306245	9606.ENSP00000229135	0	0	0	0	0.051	0	0.9	0.491	0.947
RPA2	MSH2	1856012	1843341	9606.ENSP00000363021	9606.ENSP00000233146	0	0	0	0	0.238	0.184	0.9	0.245	0.946
TP53	BCL2A1	1846083	1845978	9606.ENSP00000269305	9606.ENSP00000267953	0	0	0	0	0	0.097	0.9	0.443	0.945
HSPA1A	C11orf73	1856351	1846568	9606.ENSP00000364802	9606.ENSP00000278483	0	0	0	0	0.124	0.413	0.9	0	0.944
JUN	SMAD7	1855436	1845078	9606.ENSP00000360266	9606.ENSP00000262158	0	0	0	0	0	0.069	0.9	0.447	0.944
PARP1	TP53	1854450	1846083	9606.ENSP00000355759	9606.ENSP00000269305	0	0	0	0	0.092	0.36	0	0.905	0.941
VEGFA	TP53	1855611	1846083	9606.ENSP00000361125	9606.ENSP00000269305	0	0	0	0	0	0	0	0.941	0.941
HCK	IL8	1856392	1848852	9606.ENSP00000365012	9606.ENSP00000306512	0	0	0	0	0.066	0	0.9	0.364	0.935
PFKFB3	HIF1A	1857093	1852062	9606.ENSP00000369100	9606.ENSP00000338018	0	0	0	0	0.053	0	0.9	0.36	0.934
CXCL3	CCR2	1847662	1847341	9606.ENSP00000296026	9606.ENSP00000292301	0	0	0	0	0.052	0	0.9	0.365	0.934
JUN	CRYZ	1855436	1852214	9606.ENSP00000360266	9606.ENSP00000339399	0	0	0	0	0	0	0.9	0.366	0.933
PTGS2	IL8	1854602	1848852	9606.ENSP00000356438	9606.ENSP00000306512	0	0	0	0	0.707	0	0	0.781	0.933
VEGFA	CSF1R	1855611	1847002	9606.ENSP00000361125	9606.ENSP00000286301	0	0	0	0	0	0.098	0.8	0.659	0.933
TLR7	TLR8	1857265	1842687	9606.ENSP00000370034	9606.ENSP00000218032	0	0	0	0.914	0.299	0	0.9	0.922	0.932
IRF2	GBP1	1858109	1855263	9606.ENSP00000377218	9606.ENSP00000359504	0	0	0	0	0.072	0	0.9	0.331	0.932
RPA2	DBF4	1856012	1845796	9606.ENSP00000363021	9606.ENSP00000265728	0	0	0	0	0.056	0	0.9	0.347	0.932
RB1	ASF1A	1845924	1843214	9606.ENSP00000267163	9606.ENSP00000229595	0	0	0	0	0.229	0	0.9	0.185	0.931
FOS	SMAD7	1848822	1845078	9606.ENSP00000306245	9606.ENSP00000262158	0	0	0	0	0	0	0.9	0.347	0.931
HCK	BLNK	1856392	1842996	9606.ENSP00000365012	9606.ENSP00000224337	0	0	0	0	0.06	0.169	0.9	0.226	0.931
IL8	CXCL3	1848852	1847662	9606.ENSP00000306512	9606.ENSP00000296026	0	0	0	0.871	0.265	0	0.9	0.709	0.93
PRKACB	CREM	1855328	1845738	9606.ENSP00000359719	9606.ENSP00000265372	0	0	0	0	0.054	0	0.9	0.316	0.929
HIF1A	BHLHE40	1852062	1844442	9606.ENSP00000338018	9606.ENSP00000256495	0	0	0	0	0	0.07	0.9	0.307	0.929
SIK1	TP53	1846133	1846083	9606.ENSP00000270162	9606.ENSP00000269305	0	0	0	0	0	0.1	0.9	0.274	0.928
DYNC1I2	COPB2	1858457	1851147	9606.ENSP00000380308	9606.ENSP00000329419	0	0	0	0	0.31	0	0.9	0	0.928
IRF2	JUN	1858109	1855436	9606.ENSP00000377218	9606.ENSP00000360266	0	0	0	0	0	0	0.9	0.304	0.927
JUN	MSH2	1855436	1843341	9606.ENSP00000360266	9606.ENSP00000233146	0	0	0	0	0	0.065	0.9	0.289	0.927
IL1B	IFNG	1845335	1843180	9606.ENSP00000263341	9606.ENSP00000229135	0	0	0	0	0.053	0	0	0.925	0.927
NDUFA8	NDUFAF1	1855985	1844780	9606.ENSP00000362873	9606.ENSP00000260361	0	0	0	0	0.197	0.155	0.9	0	0.926
CRYZ	FOS	1852214	1848822	9606.ENSP00000339399	9606.ENSP00000306245	0	0	0	0	0.053	0	0.9	0.287	0.926
THBD	JUN	1856612	1855436	9606.ENSP00000366307	9606.ENSP00000360266	0	0	0	0	0	0	0.9	0.284	0.925
OAS1	TRIM5	1859322	1857137	9606.ENSP00000388001	9606.ENSP00000369373	0	0	0	0	0.186	0	0.9	0.161	0.925
TNFAIP3	RIPK2	1843455	1842798	9606.ENSP00000237289	9606.ENSP00000220751	0	0	0	0	0.127	0.054	0.9	0.2	0.925
IRF2	OAS2	1858109	1852576	9606.ENSP00000377218	9606.ENSP00000342278	0	0	0	0	0	0	0.9	0.272	0.924
IL1B	CCL3	1845335	1843010	9606.ENSP00000263341	9606.ENSP00000225245	0	0	0	0	0.548	0	0	0.84	0.924
TRIM34	OAS1	1860356	1859322	9606.ENSP00000402595	9606.ENSP00000388001	0	0	0	0	0.097	0.185	0.9	0.087	0.923
TRIM34	OAS2	1860356	1852576	9606.ENSP00000402595	9606.ENSP00000342278	0	0	0	0	0.088	0.185	0.9	0.087	0.923
TP53	ASF1A	1846083	1843214	9606.ENSP00000269305	9606.ENSP00000229595	0	0	0	0	0	0.133	0.9	0.189	0.923
OAS1	IRF2	1859322	1858109	9606.ENSP00000388001	9606.ENSP00000377218	0	0	0	0	0	0	0.9	0.246	0.921
TRIM5	OAS2	1857137	1852576	9606.ENSP00000369373	9606.ENSP00000342278	0	0	0	0	0.177	0	0.9	0.122	0.921
VEGFA	IL8	1855611	1848852	9606.ENSP00000361125	9606.ENSP00000306512	0	0	0	0	0	0	0	0.919	0.919
PTPN6	IFNG	1859578	1843180	9606.ENSP00000391592	9606.ENSP00000229135	0	0	0	0	0.053	0	0.9	0.204	0.918
MEF2C	RB1	1852378	1845924	9606.ENSP00000340874	9606.ENSP00000267163	0	0	0	0	0.05	0	0.9	0.21	0.918
HIF1A	HBEGF	1852062	1843270	9606.ENSP00000338018	9606.ENSP00000230990	0	0	0	0	0	0	0.9	0.211	0.917
TP53	TAF4	1846083	1844180	9606.ENSP00000269305	9606.ENSP00000252996	0	0	0	0	0	0	0.9	0.212	0.917
VEGFA	PTGS2	1855611	1854602	9606.ENSP00000361125	9606.ENSP00000356438	0	0	0	0	0.058	0	0	0.916	0.917
FOS	MSH2	1848822	1843341	9606.ENSP00000306245	9606.ENSP00000233146	0	0	0	0	0	0	0.9	0.185	0.915
P2RY13	CCR2	1850239	1847341	9606.ENSP00000320376	9606.ENSP00000292301	0	0	0	0.668	0.175	0	0.9	0.089	0.915
P2RY14	IL8	1849063	1848852	9606.ENSP00000308361	9606.ENSP00000306512	0	0	0	0	0	0	0.9	0.193	0.915
CX3CR1	CCL3	1853665	1843010	9606.ENSP00000351059	9606.ENSP00000225245	0	0	0	0	0	0	0.8	0.588	0.914
ACADM	SUCLA2	1860801	1856910	9606.ENSP00000409612	9606.ENSP00000367923	0.062	0	0	0	0.476	0.778	0	0.303	0.914
PMAIP1	BCL2A1	1850799	1845978	9606.ENSP00000326119	9606.ENSP00000267953	0	0	0	0	0.071	0.829	0	0.5	0.914
P2RY13	P2RY14	1850239	1849063	9606.ENSP00000320376	9606.ENSP00000308361	0	0	0	0.928	0.122	0	0.9	0.865	0.914
ACADM	HIBCH	1860801	1853891	9606.ENSP00000409612	9606.ENSP00000352706	0.309	0	0	0	0.553	0.434	0.435	0.254	0.913
OAS2	SAMHD1	1852576	1845231	9606.ENSP00000342278	9606.ENSP00000262878	0	0	0	0	0.165	0	0.9	0.047	0.913
FOS	FOSL2	1848822	1845606	9606.ENSP00000306245	9606.ENSP00000264716	0	0	0	0.869	0.081	0	0.9	0.75	0.913
PRKAR1A	CREM	1853711	1845738	9606.ENSP00000351410	9606.ENSP00000265372	0	0	0	0	0.053	0	0.9	0.159	0.913
RANBP2	MAD1L1	1846837	1845817	9606.ENSP00000283195	9606.ENSP00000265854	0	0	0	0	0.092	0	0.9	0.123	0.913
IRF2	XAF1	1858109	1854224	9606.ENSP00000377218	9606.ENSP00000354822	0	0	0	0	0.091	0	0.9	0.122	0.913
DUSP6	DUSP4	1846636	1843550	9606.ENSP00000279488	9606.ENSP00000240100	0	0	0	0.803	0.059	0	0.9	0.63	0.913
PTGS2	TP53	1854602	1846083	9606.ENSP00000356438	9606.ENSP00000269305	0	0	0	0	0	0.36	0	0.868	0.912
MRPS28	MRPL51	1846503	1843184	9606.ENSP00000276585	9606.ENSP00000229238	0	0	0	0	0.156	0	0.9	0	0.912
P2RY13	IL8	1850239	1848852	9606.ENSP00000320376	9606.ENSP00000306512	0	0	0	0	0	0	0.9	0.161	0.912
NLRC4	IL1B	1854083	1845335	9606.ENSP00000354159	9606.ENSP00000263341	0	0	0	0	0	0	0.8	0.574	0.911
TICAM2	IL1B	1859151	1845335	9606.ENSP00000386341	9606.ENSP00000263341	0	0	0	0	0	0	0.9	0.152	0.911
NEK7	RANBP2	1854578	1846837	9606.ENSP00000356355	9606.ENSP00000283195	0	0	0	0	0.116	0	0.9	0.081	0.911
MTIF3	MRPS31	1857334	1849784	9606.ENSP00000370508	9606.ENSP00000315397	0	0	0	0	0.15	0	0.9	0	0.911
OAS1	SAMHD1	1859322	1845231	9606.ENSP00000388001	9606.ENSP00000262878	0	0	0	0	0.116	0	0.9	0.082	0.911
HIST1H1C	ASF1A	1852230	1843214	9606.ENSP00000339566	9606.ENSP00000229595	0	0	0	0	0.057	0.071	0.9	0.096	0.91
TRIM5	GBP1	1857137	1855263	9606.ENSP00000369373	9606.ENSP00000359504	0	0	0	0	0.104	0	0.9	0.083	0.91
TRIM34	IRF2	1860356	1858109	9606.ENSP00000402595	9606.ENSP00000377218	0	0	0	0	0.129	0	0.9	0.054	0.91
IRF2	TRIM5	1858109	1857137	9606.ENSP00000377218	9606.ENSP00000369373	0	0	0	0	0.092	0	0.9	0.089	0.91
HCAR3	CXCL3	1862042	1847662	9606.ENSP00000436714	9606.ENSP00000296026	0	0	0	0	0.058	0	0.9	0.116	0.909
DUSP2	DUSP6	1847145	1846636	9606.ENSP00000288943	9606.ENSP00000279488	0	0	0	0.841	0.059	0	0.9	0.525	0.909
FOS	ZFP36	1848822	1843925	9606.ENSP00000306245	9606.ENSP00000248673	0	0	0	0	0.844	0	0	0.441	0.909
HCAR3	IL8	1862042	1848852	9606.ENSP00000436714	9606.ENSP00000306512	0	0	0	0	0	0	0.9	0.126	0.908
HSD17B4	JUN	1861507	1855436	9606.ENSP00000420914	9606.ENSP00000360266	0	0	0	0	0	0.067	0.9	0.1	0.908
MTIF3	MRPL51	1857334	1843184	9606.ENSP00000370508	9606.ENSP00000229238	0	0	0	0	0	0	0.9	0.113	0.907
IRF2	SAMHD1	1858109	1845231	9606.ENSP00000377218	9606.ENSP00000262878	0	0	0	0	0.079	0	0.9	0.078	0.907
HCAR3	CCL20	1862042	1853751	9606.ENSP00000436714	9606.ENSP00000351671	0	0	0	0	0	0	0.9	0.1	0.906
HCAR3	CXCL2	1862042	1861702	9606.ENSP00000436714	9606.ENSP00000427279	0	0	0	0	0.058	0	0.9	0.09	0.906
PDE4B	DCK	1851429	1847023	9606.ENSP00000332116	9606.ENSP00000286648	0	0	0	0	0.075	0	0.9	0.067	0.906
HCAR3	P2RY13	1862042	1850239	9606.ENSP00000436714	9606.ENSP00000320376	0	0	0	0.665	0.078	0	0.9	0.123	0.906
COPB2	DYNLL1	1851147	1843632	9606.ENSP00000329419	9606.ENSP00000242577	0	0	0	0	0.101	0	0.9	0	0.906
HIST1H1C	RB1	1852230	1845924	9606.ENSP00000339566	9606.ENSP00000267163	0	0	0	0	0	0	0.9	0.097	0.905
XAF1	SAMHD1	1854224	1845231	9606.ENSP00000354822	9606.ENSP00000262878	0	0	0	0	0.091	0	0.9	0.042	0.905
HCAR3	P2RY14	1862042	1849063	9606.ENSP00000436714	9606.ENSP00000308361	0	0	0	0.663	0.052	0	0.9	0.15	0.904
P2RY14	CCR2	1849063	1847341	9606.ENSP00000308361	9606.ENSP00000292301	0	0	0	0.69	0.053	0	0.9	0.111	0.903
HIF1A	LRRK2	1852062	1848005	9606.ENSP00000338018	9606.ENSP00000298910	0	0	0	0	0.046	0	0.9	0.064	0.903
DUSP2	DUSP4	1847145	1843550	9606.ENSP00000288943	9606.ENSP00000240100	0	0	0	0.939	0	0	0.9	0.655	0.903
CCL20	P2RY14	1853751	1849063	9606.ENSP00000351671	9606.ENSP00000308361	0	0	0	0	0	0	0.9	0.074	0.903
RANBP2	C11orf73	1846837	1846568	9606.ENSP00000283195	9606.ENSP00000278483	0	0	0	0	0.061	0	0.9	0	0.902
SKA2	RANBP2	1851585	1846837	9606.ENSP00000333433	9606.ENSP00000283195	0	0	0	0	0	0	0.9	0.065	0.902
CXCL2	P2RY13	1861702	1850239	9606.ENSP00000427279	9606.ENSP00000320376	0	0	0	0	0.051	0	0.9	0	0.901
CCL3L1	CCR2	1860750	1847341	9606.ENSP00000408984	9606.ENSP00000292301	0	0	0	0	0.057	0.145	0.8	0.458	0.901
SLC2A14	MEF2C	1858405	1852378	9606.ENSP00000379834	9606.ENSP00000340874	0	0	0	0	0.052	0	0.9	0.045	0.901
TRIM34	GBP1	1860356	1855263	9606.ENSP00000402595	9606.ENSP00000359504	0	0	0	0	0.054	0	0.9	0	0.901
CCL20	P2RY13	1853751	1850239	9606.ENSP00000351671	9606.ENSP00000320376	0	0	0	0	0	0	0.9	0.055	0.901
GPR84	PTGER2	1845912	1843759	9606.ENSP00000267015	9606.ENSP00000245457	0	0	0	0	0.052	0	0.9	0	0.901
MRPS31	MRPL51	1849784	1843184	9606.ENSP00000315397	9606.ENSP00000229238	0	0	0	0	0.057	0	0.9	0	0.901
NFIL3	BHLHE40	1847898	1844442	9606.ENSP00000297689	9606.ENSP00000256495	0	0	0	0	0	0.611	0	0.758	0.901
P2RY13	CXCL3	1850239	1847662	9606.ENSP00000320376	9606.ENSP00000296026	0	0	0	0	0.051	0	0.9	0	0.901
DYNC1I2	HAUS3	1858457	1843680	9606.ENSP00000380308	9606.ENSP00000243706	0	0	0	0	0	0	0.9	0.057	0.901
RACGAP1	DYNLL1	1849236	1843632	9606.ENSP00000309871	9606.ENSP00000242577	0	0	0	0	0.054	0	0.9	0	0.901
HCAR3	CCR2	1862042	1847341	9606.ENSP00000436714	9606.ENSP00000292301	0	0	0	0.691	0	0	0.9	0.078	0.901
LRRK2	HBEGF	1848005	1843270	9606.ENSP00000298910	9606.ENSP00000230990	0	0	0	0	0.053	0	0.9	0	0.901
DYNC1I2	RACGAP1	1858457	1849236	9606.ENSP00000380308	9606.ENSP00000309871	0	0	0	0	0.049	0	0.9	0	0.9
COPB2	RACGAP1	1851147	1849236	9606.ENSP00000329419	9606.ENSP00000309871	0	0	0	0	0	0	0.9	0	0.9
HAUS3	DYNLL1	1843680	1843632	9606.ENSP00000243706	9606.ENSP00000242577	0	0	0	0	0	0	0.9	0.048	0.9
CXCL2	P2RY14	1861702	1849063	9606.ENSP00000427279	9606.ENSP00000308361	0	0	0	0	0	0	0.9	0	0.9
P2RY14	CXCL3	1849063	1847662	9606.ENSP00000308361	9606.ENSP00000296026	0	0	0	0	0	0	0.9	0	0.9
GABARAPL3	GABARAPL1	1859764	1845870	9606.ENSP00000394008	9606.ENSP00000266458	0	0	0	0.986	0	0	0.9	0.47	0.9
SKA2	MAD1L1	1851585	1845817	9606.ENSP00000333433	9606.ENSP00000265854	0	0	0	0	0	0	0.9	0	0.9
ADM	GPR84	1846549	1845912	9606.ENSP00000278175	9606.ENSP00000267015	0	0	0	0	0	0	0.9	0	0.9
KBTBD8	DTX3L	1860312	1847691	9606.ENSP00000401878	9606.ENSP00000296161	0	0	0	0	0	0	0.9	0	0.9
MTIF3	MRPS28	1857334	1846503	9606.ENSP00000370508	9606.ENSP00000276585	0	0	0	0	0	0	0.9	0	0.9
ADM	PTGER2	1846549	1843759	9606.ENSP00000278175	9606.ENSP00000245457	0	0	0	0	0	0	0.9	0	0.9
IL8	IFNG	1848852	1843180	9606.ENSP00000306512	9606.ENSP00000229135	0	0	0	0	0	0	0	0.898	0.899
CX3CR1	IL8	1853665	1848852	9606.ENSP00000351059	9606.ENSP00000306512	0	0	0	0	0	0	0.8	0.505	0.896
ATF3	CREM	1852803	1845738	9606.ENSP00000344352	9606.ENSP00000265372	0	0	0	0	0.073	0.074	0.8	0.45	0.893
CXCL2	IL1B	1861702	1845335	9606.ENSP00000427279	9606.ENSP00000263341	0	0	0	0	0.503	0	0	0.776	0.884
CCL20	CX3CR1	1853751	1853665	9606.ENSP00000351671	9606.ENSP00000351059	0	0	0	0	0	0	0.8	0.44	0.883
BTN3A2	BTN3A3	1853339	1843719	9606.ENSP00000348751	9606.ENSP00000244519	0	0	0	0.988	0.797	0.437	0	0.63	0.881
GIMAP5	GIMAP4	1853717	1844396	9606.ENSP00000351473	9606.ENSP00000255945	0	0	0	0.856	0.86	0	0	0.91	0.878
TP53	TNFSF10	1846083	1843591	9606.ENSP00000269305	9606.ENSP00000241261	0	0	0	0	0	0	0	0.875	0.875
FOS	CCL3	1848822	1843010	9606.ENSP00000306245	9606.ENSP00000225245	0	0	0	0	0.164	0	0.8	0.303	0.873
JUN	CCL3	1855436	1843010	9606.ENSP00000360266	9606.ENSP00000225245	0	0	0	0	0.052	0	0.8	0.376	0.871
OAS1	DDX58	1859322	1857110	9606.ENSP00000388001	9606.ENSP00000369213	0	0	0	0	0.73	0.083	0	0.518	0.87
CREM	ATF1	1845738	1845050	9606.ENSP00000265372	9606.ENSP00000262053	0	0	0	0.94	0	0.359	0.8	0.543	0.87
TNFAIP3	NFKBIA	1843455	1842621	9606.ENSP00000237289	9606.ENSP00000216797	0	0	0	0	0.759	0	0	0.48	0.869
SLC2A14	SLC2A3	1858405	1842244	9606.ENSP00000379834	9606.ENSP00000075120	0	0	0.527	0.989	0.866	0	0	0.697	0.868
ACTL6A	BANF1	1860014	1849280	9606.ENSP00000397552	9606.ENSP00000310275	0	0	0	0	0.11	0.164	0	0.835	0.867
CXCL2	CX3CR1	1861702	1853665	9606.ENSP00000427279	9606.ENSP00000351059	0	0	0	0	0	0	0.8	0.366	0.867
DDX58	OAS2	1857110	1852576	9606.ENSP00000369213	9606.ENSP00000342278	0	0	0	0	0.75	0.083	0	0.458	0.865
GIMAP8	GIMAP4	1848703	1844396	9606.ENSP00000305107	9606.ENSP00000255945	0	0	0	0.798	0.855	0	0	0.367	0.865
DDIT3	PPP1R15A	1862449	1842391	9606.ENSP00000447803	9606.ENSP00000200453	0	0	0	0	0.196	0	0	0.837	0.863
VEGFA	IL1B	1855611	1845335	9606.ENSP00000361125	9606.ENSP00000263341	0	0	0	0	0	0	0	0.862	0.862
GIMAP6	GIMAP4	1851247	1844396	9606.ENSP00000330374	9606.ENSP00000255945	0	0	0	0.868	0.848	0	0	0.645	0.861
CCL3L1	CX3CR1	1860750	1853665	9606.ENSP00000408984	9606.ENSP00000351059	0	0	0	0	0	0	0.8	0.338	0.861
XAF1	SAMD9L	1854224	1850811	9606.ENSP00000354822	9606.ENSP00000326247	0	0	0	0	0.827	0	0	0.186	0.853
ATF3	ATF1	1852803	1845050	9606.ENSP00000344352	9606.ENSP00000262053	0	0	0	0	0.051	0.074	0.8	0.266	0.853
DDX60	OAS2	1858119	1852576	9606.ENSP00000377344	9606.ENSP00000342278	0	0	0	0	0.781	0.066	0	0.322	0.85
IL8	CCL3	1848852	1843010	9606.ENSP00000306512	9606.ENSP00000225245	0	0	0	0	0.192	0	0	0.821	0.849
DDX60	SAMD9L	1858119	1850811	9606.ENSP00000377344	9606.ENSP00000326247	0	0	0	0	0.814	0	0	0.211	0.847
IL1B	NFKBIA	1845335	1842621	9606.ENSP00000263341	9606.ENSP00000216797	0	0	0	0	0.132	0	0	0.829	0.845
DDX60	DDX58	1858119	1857110	9606.ENSP00000377344	9606.ENSP00000369213	0	0	0	0	0.765	0	0	0.352	0.841
NR4A2	FOSB	1852822	1843783	9606.ENSP00000344479	9606.ENSP00000245919	0	0	0	0	0.76	0	0	0.367	0.841
ACADM	ACSL1	1860801	1846727	9606.ENSP00000409612	9606.ENSP00000281455	0.309	0	0	0	0.351	0.096	0.435	0.402	0.838
GBP1	SAMD9L	1855263	1850811	9606.ENSP00000359504	9606.ENSP00000326247	0	0	0	0	0.792	0	0	0.25	0.837
DDIT3	JUN	1862449	1855436	9606.ENSP00000447803	9606.ENSP00000360266	0	0	0	0	0.088	0.604	0	0.58	0.835
CX3CR1	CXCL3	1853665	1847662	9606.ENSP00000351059	9606.ENSP00000296026	0	0	0	0	0	0	0.8	0.205	0.834
CCL20	IL1B	1853751	1845335	9606.ENSP00000351671	9606.ENSP00000263341	0	0	0	0	0.364	0	0	0.749	0.834
FOSL2	FOSB	1845606	1843783	9606.ENSP00000264716	9606.ENSP00000245919	0	0	0	0.803	0.053	0	0.8	0.823	0.834
TLR7	DDX58	1857265	1857110	9606.ENSP00000370034	9606.ENSP00000369213	0	0	0	0	0.053	0	0	0.827	0.829
TLR5	IL8	1852287	1848852	9606.ENSP00000340089	9606.ENSP00000306512	0	0	0	0	0.055	0	0	0.824	0.826
PRKACB	NFKBIA	1855328	1842621	9606.ENSP00000359719	9606.ENSP00000216797	0	0	0	0	0.096	0.072	0.8	0.057	0.82
HSPA1A	MKKS	1856351	1843796	9606.ENSP00000364802	9606.ENSP00000246062	0.309	0	0	0	0.464	0.3	0	0.373	0.815
ACTL6A	TP53	1860014	1846083	9606.ENSP00000397552	9606.ENSP00000269305	0	0	0	0	0	0.36	0	0.722	0.815
GIMAP5	GIMAP8	1853717	1848703	9606.ENSP00000351473	9606.ENSP00000305107	0	0	0	0.834	0.805	0	0	0.311	0.814
AREG	EREG	1845557	1843742	9606.ENSP00000264487	9606.ENSP00000244869	0	0	0	0	0.189	0	0	0.78	0.814
HSD17B4	ACSL1	1861507	1846727	9606.ENSP00000420914	9606.ENSP00000281455	0.048	0	0	0	0.712	0	0.108	0.324	0.812
OAS2	SAMD9L	1852576	1850811	9606.ENSP00000342278	9606.ENSP00000326247	0	0	0	0	0.782	0	0	0.167	0.811
CCL3L1	JUN	1860750	1855436	9606.ENSP00000408984	9606.ENSP00000360266	0	0	0	0	0.052	0	0.8	0.086	0.811
TRIB1	FOSL2	1849501	1845606	9606.ENSP00000312150	9606.ENSP00000264716	0	0	0	0	0.068	0.785	0	0.123	0.81
CCL3L1	FOS	1860750	1848822	9606.ENSP00000408984	9606.ENSP00000306245	0	0	0	0	0	0	0.8	0.088	0.809
DYNC1I2	TUBB2A	1858457	1857206	9606.ENSP00000380308	9606.ENSP00000369703	0	0	0	0	0.053	0	0.8	0.065	0.807
PRKACB	ATF1	1855328	1845050	9606.ENSP00000359719	9606.ENSP00000262053	0	0	0	0	0.05	0	0.8	0.066	0.807
OAS1	OAS2	1859322	1852576	9606.ENSP00000388001	9606.ENSP00000342278	0	0	0	0.94	0.797	0	0	0.861	0.807
OAS1	DDX60	1859322	1858119	9606.ENSP00000388001	9606.ENSP00000377344	0	0	0	0	0.745	0.066	0	0.239	0.803
HSD17B4	ACADM	1861507	1860801	9606.ENSP00000420914	9606.ENSP00000409612	0.309	0	0	0	0.354	0	0.435	0.309	0.802
CCL3L1	CCL3	1860750	1843010	9606.ENSP00000408984	9606.ENSP00000225245	0	0	0	0.985	0	0	0.8	0.726	0.802
TP53	THBS1	1846083	1844779	9606.ENSP00000269305	9606.ENSP00000260356	0	0	0	0	0	0	0	0.801	0.801
HSPA1A	HSPA1B	1856351	1856350	9606.ENSP00000364802	9606.ENSP00000364801	0	0	0.527	0.991	0	0.8	0	0.595	0.801
TRIM34	ENSG00000258588	1860356	1853105	9606.ENSP00000402595	9606.ENSP00000346916	0	0	0	0.989	0	0.8	0	0.416	0.8
DCK	SAMHD1	1847023	1845231	9606.ENSP00000286648	9606.ENSP00000262878	0	0	0	0	0.091	0.746	0	0.204	0.8
SAMD9	SAMD9L	1857120	1850811	9606.ENSP00000369292	9606.ENSP00000326247	0	0	0	0.967	0.793	0	0	0.91	0.799
GIMAP6	GIMAP8	1851247	1848703	9606.ENSP00000330374	9606.ENSP00000305107	0	0	0	0.845	0.782	0	0	0.393	0.795
GIMAP5	GIMAP6	1853717	1851247	9606.ENSP00000351473	9606.ENSP00000330374	0	0	0	0.886	0.779	0	0	0.508	0.791
DDX60	SAMD9	1858119	1857120	9606.ENSP00000377344	9606.ENSP00000369292	0	0	0	0	0.706	0	0	0.304	0.787
VEGFA	CCL3	1855611	1843010	9606.ENSP00000361125	9606.ENSP00000225245	0	0	0	0	0	0	0	0.785	0.785
DDIT3	FOS	1862449	1848822	9606.ENSP00000447803	9606.ENSP00000306245	0	0	0	0	0.046	0.628	0	0.443	0.785
STX7	PPIF	1854689	1843008	9606.ENSP00000356918	9606.ENSP00000225174	0	0	0	0	0.054	0.777	0	0	0.781
HSPA1B	MKKS	1856350	1843796	9606.ENSP00000364801	9606.ENSP00000246062	0.309	0	0	0	0.464	0.3	0	0.254	0.78
STX7	SBDS	1854689	1843839	9606.ENSP00000356918	9606.ENSP00000246868	0	0	0	0	0.056	0.774	0	0.044	0.779
CXCL2	CCL3	1861702	1843010	9606.ENSP00000427279	9606.ENSP00000225245	0	0	0	0	0.268	0	0	0.711	0.779
FOS	RB1	1848822	1845924	9606.ENSP00000306245	9606.ENSP00000267163	0	0	0	0	0	0.36	0	0.665	0.777
JUN	PARP1	1855436	1854450	9606.ENSP00000360266	9606.ENSP00000355759	0	0	0	0	0	0.36	0	0.666	0.777
TUBB2A	LRRK2	1857206	1848005	9606.ENSP00000369703	9606.ENSP00000298910	0	0	0	0	0.042	0.595	0	0.469	0.776
ZFP36	FOSB	1843925	1843783	9606.ENSP00000248673	9606.ENSP00000245919	0	0	0	0	0.643	0	0	0.396	0.775
MPLKIP	SBDS	1848650	1843839	9606.ENSP00000304553	9606.ENSP00000246868	0	0	0	0	0	0.774	0	0	0.774
DDX60	XAF1	1858119	1854224	9606.ENSP00000377344	9606.ENSP00000354822	0	0	0	0	0.736	0	0	0.166	0.771
DDX58	SAMD9L	1857110	1850811	9606.ENSP00000369213	9606.ENSP00000326247	0	0	0	0	0.767	0	0	0.056	0.77
GIMAP1	GIMAP4	1848457	1844396	9606.ENSP00000302833	9606.ENSP00000255945	0	0	0	0.873	0.738	0	0	0.91	0.768
LRRK2	RANBP2	1848005	1846837	9606.ENSP00000298910	9606.ENSP00000283195	0	0	0	0	0.128	0.472	0	0.536	0.768
HSD17B4	HIBCH	1861507	1853891	9606.ENSP00000420914	9606.ENSP00000352706	0.309	0	0	0	0.296	0	0.435	0.254	0.767
ACTL6A	RB1	1860014	1845924	9606.ENSP00000397552	9606.ENSP00000267163	0	0	0	0	0.054	0	0.72	0.186	0.765
HCK	MNDA	1856392	1854743	9606.ENSP00000365012	9606.ENSP00000357123	0	0	0	0	0.749	0.094	0	0.053	0.765
CSF1R	IGSF6	1847002	1846016	9606.ENSP00000286301	9606.ENSP00000268389	0	0	0	0	0.758	0	0	0.056	0.763
NR4A2	FOS	1852822	1848822	9606.ENSP00000344479	9606.ENSP00000306245	0	0	0	0	0.604	0	0	0.424	0.762
TP53	PPIF	1846083	1843008	9606.ENSP00000269305	9606.ENSP00000225174	0	0	0	0	0	0.43	0	0.6	0.762
TP53	SMAD7	1846083	1845078	9606.ENSP00000269305	9606.ENSP00000262158	0	0	0	0	0.049	0.324	0	0.657	0.76
TRIB1	LRRK2	1849501	1848005	9606.ENSP00000312150	9606.ENSP00000298910	0.054	0	0	0	0.101	0.529	0	0.471	0.759
ECHDC1	HSD17B4	1862038	1861507	9606.ENSP00000436585	9606.ENSP00000420914	0.309	0	0	0	0.232	0	0.435	0.279	0.754
IL8	NAMPT	1848852	1842925	9606.ENSP00000306512	9606.ENSP00000222553	0	0	0	0	0.3	0	0	0.662	0.753
PARP1	CDKN1A	1854450	1843736	9606.ENSP00000355759	9606.ENSP00000244741	0	0	0	0	0	0.36	0	0.629	0.752
VEGFA	PLAUR	1855611	1852201	9606.ENSP00000361125	9606.ENSP00000339328	0	0	0	0	0.047	0	0	0.751	0.752
TUBB2A	TXNDC9	1857206	1845514	9606.ENSP00000369703	9606.ENSP00000264255	0	0	0	0	0.054	0.66	0	0.287	0.751
VEGFA	OSM	1855611	1842507	9606.ENSP00000361125	9606.ENSP00000215781	0	0	0	0	0	0	0	0.751	0.751
TNFSF10	IFNG	1843591	1843180	9606.ENSP00000241261	9606.ENSP00000229135	0	0	0	0	0	0	0	0.75	0.75
PTGS2	IFNG	1854602	1843180	9606.ENSP00000356438	9606.ENSP00000229135	0	0	0	0	0	0	0	0.749	0.749
DDX60	GBP1	1858119	1855263	9606.ENSP00000377344	9606.ENSP00000359504	0	0	0	0	0.713	0	0	0.16	0.748
HSPA1A	TP53	1856351	1846083	9606.ENSP00000364802	9606.ENSP00000269305	0	0	0	0	0.052	0.424	0	0.574	0.747
ATF3	FOS	1852803	1848822	9606.ENSP00000344352	9606.ENSP00000306245	0	0	0	0.724	0.548	0.359	0	0.588	0.746
LRRK2	RIPK2	1848005	1842798	9606.ENSP00000298910	9606.ENSP00000220751	0.054	0	0	0.615	0.047	0.67	0	0.575	0.746
ATF3	PPP1R15A	1852803	1842391	9606.ENSP00000344352	9606.ENSP00000200453	0	0	0	0	0.507	0	0	0.506	0.746
VEGFA	TNFSF10	1855611	1843591	9606.ENSP00000361125	9606.ENSP00000241261	0	0	0	0	0	0	0	0.743	0.743
TP53	IL1B	1846083	1845335	9606.ENSP00000269305	9606.ENSP00000263341	0	0	0	0	0	0	0	0.742	0.742
DPYD	MSH2	1855189	1843341	9606.ENSP00000359211	9606.ENSP00000233146	0.367	0	0	0	0.053	0	0	0.597	0.737
TP53	NFKBIA	1846083	1842621	9606.ENSP00000269305	9606.ENSP00000216797	0	0	0	0	0	0.407	0	0.573	0.736
DDX58	XAF1	1857110	1854224	9606.ENSP00000369213	9606.ENSP00000354822	0	0	0	0	0.695	0	0	0.17	0.736
GPR183	RGS1	1856496	1854596	9606.ENSP00000365596	9606.ENSP00000356429	0	0	0	0	0.71	0	0	0.127	0.736
IL8	NFKBIA	1848852	1842621	9606.ENSP00000306512	9606.ENSP00000216797	0	0	0	0	0.246	0	0	0.663	0.735
SMAD7	SKIL	1845078	1844666	9606.ENSP00000262158	9606.ENSP00000259119	0	0	0	0	0.055	0.051	0	0.727	0.734
IL8	TNFSF10	1848852	1843591	9606.ENSP00000306512	9606.ENSP00000241261	0	0	0	0	0.049	0	0	0.73	0.732
IFI16	TP53	1854740	1846083	9606.ENSP00000357113	9606.ENSP00000269305	0	0	0	0	0	0.36	0	0.598	0.732
THBS1	FGL2	1844779	1843920	9606.ENSP00000260356	9606.ENSP00000248598	0	0	0	0	0	0	0.72	0.074	0.729
OAS1	SAMD9L	1859322	1850811	9606.ENSP00000388001	9606.ENSP00000326247	0	0	0	0	0.658	0	0	0.241	0.729
PARP1	TIPARP	1854450	1847644	9606.ENSP00000355759	9606.ENSP00000295924	0	0	0	0	0	0	0	0.728	0.728
IL8	TP53	1848852	1846083	9606.ENSP00000306512	9606.ENSP00000269305	0	0	0	0	0	0.126	0	0.7	0.726
DDX58	TNFSF10	1857110	1843591	9606.ENSP00000369213	9606.ENSP00000241261	0	0	0	0	0.297	0	0	0.624	0.725
TP53	BHLHE40	1846083	1844442	9606.ENSP00000269305	9606.ENSP00000256495	0	0	0	0	0	0.36	0	0.587	0.724
PRKACB	CDKN1A	1855328	1843736	9606.ENSP00000359719	9606.ENSP00000244741	0	0	0	0	0	0	0.72	0.052	0.723
ATF3	FOSL2	1852803	1845606	9606.ENSP00000344352	9606.ENSP00000264716	0	0	0	0.739	0.189	0.628	0	0.441	0.719
GBP1	XAF1	1855263	1854224	9606.ENSP00000359504	9606.ENSP00000354822	0	0	0	0	0.629	0	0	0.27	0.717
SLC2A14	HIF1A	1858405	1852062	9606.ENSP00000379834	9606.ENSP00000338018	0	0	0	0	0.088	0	0	0.701	0.716
LRRK2	TP53	1848005	1846083	9606.ENSP00000298910	9606.ENSP00000269305	0	0	0	0	0.05	0.36	0	0.568	0.714
SUCLA2	DPYD	1856910	1855189	9606.ENSP00000367923	9606.ENSP00000359211	0.356	0	0	0	0.181	0	0	0.503	0.714
HIF1A	SLC2A3	1852062	1842244	9606.ENSP00000338018	9606.ENSP00000075120	0	0	0	0	0.071	0	0	0.702	0.712
GIMAP6	GIMAP7	1851247	1849788	9606.ENSP00000330374	9606.ENSP00000315474	0	0	0	0.87	0.683	0	0	0.704	0.711
PTGS2	HBEGF	1854602	1843270	9606.ENSP00000356438	9606.ENSP00000230990	0	0	0	0	0.149	0	0	0.671	0.709
HIF1A	DDIT4	1852062	1848949	9606.ENSP00000338018	9606.ENSP00000307305	0	0	0	0	0.043	0	0	0.709	0.709
GIMAP7	GIMAP4	1849788	1844396	9606.ENSP00000315474	9606.ENSP00000255945	0	0	0	0.888	0.687	0	0	0.63	0.708
PARP1	TNFSF10	1854450	1843591	9606.ENSP00000355759	9606.ENSP00000241261	0	0	0	0	0	0	0	0.707	0.707
GIMAP5	GIMAP7	1853717	1849788	9606.ENSP00000351473	9606.ENSP00000315474	0	0	0	0.881	0.685	0	0	0.575	0.706
PTGS2	ZFP36	1854602	1843925	9606.ENSP00000356438	9606.ENSP00000248673	0	0	0	0	0.108	0	0	0.683	0.705
XAF1	TP53	1854224	1846083	9606.ENSP00000354822	9606.ENSP00000269305	0	0	0	0	0	0.326	0	0.578	0.703
VEGFA	ADM	1855611	1846549	9606.ENSP00000361125	9606.ENSP00000278175	0	0	0	0	0.053	0	0	0.698	0.702
PTGS2	HIF1A	1854602	1852062	9606.ENSP00000356438	9606.ENSP00000338018	0	0	0	0	0.055	0	0	0.697	0.701
GIMAP8	GIMAP1	1848703	1848457	9606.ENSP00000305107	9606.ENSP00000302833	0	0	0	0.848	0.682	0	0	0.362	0.698
PTGS2	AREG	1854602	1845557	9606.ENSP00000356438	9606.ENSP00000264487	0	0	0	0	0.054	0	0	0.69	0.694
THBS1	JAG1	1844779	1844342	9606.ENSP00000260356	9606.ENSP00000254958	0	0	0	0	0	0.36	0	0.54	0.693
DDX58	GBP1	1857110	1855263	9606.ENSP00000369213	9606.ENSP00000359504	0	0	0	0	0.59	0	0	0.28	0.693
GIMAP7	GIMAP8	1849788	1848703	9606.ENSP00000315474	9606.ENSP00000305107	0	0	0	0.822	0.674	0	0	0.344	0.692
PRKAR1A	LRRK2	1853711	1848005	9606.ENSP00000351410	9606.ENSP00000298910	0.045	0	0	0	0.106	0.423	0	0.447	0.691
UGDH	IL1B	1850153	1845335	9606.ENSP00000319501	9606.ENSP00000263341	0	0	0	0	0	0	0	0.687	0.687
DDX58	IL1B	1857110	1845335	9606.ENSP00000369213	9606.ENSP00000263341	0	0	0	0	0.054	0	0	0.682	0.686
PLAUR	TP53	1852201	1846083	9606.ENSP00000339328	9606.ENSP00000269305	0	0	0	0	0	0	0	0.684	0.684
DDIT3	FOSL2	1862449	1845606	9606.ENSP00000447803	9606.ENSP00000264716	0	0	0	0	0.046	0.628	0	0.183	0.684
DDX58	TLR8	1857110	1842687	9606.ENSP00000369213	9606.ENSP00000218032	0	0	0	0	0.052	0	0	0.679	0.683
IFNG	CCL3	1843180	1843010	9606.ENSP00000229135	9606.ENSP00000225245	0	0	0	0	0.054	0	0	0.678	0.682
GIMAP7	GIMAP1	1849788	1848457	9606.ENSP00000315474	9606.ENSP00000302833	0	0	0	0.876	0.653	0	0	0.63	0.679
NLRC4	TLR5	1854083	1852287	9606.ENSP00000354159	9606.ENSP00000340089	0	0	0	0	0.165	0	0	0.628	0.676
CCNL1	CDKN1A	1847645	1843736	9606.ENSP00000295926	9606.ENSP00000244741	0	0	0	0	0.052	0	0.54	0.316	0.675
CD83	CCL3	1856986	1843010	9606.ENSP00000368450	9606.ENSP00000225245	0	0	0	0	0.43	0	0	0.449	0.673
VEGFA	MEF2C	1855611	1852378	9606.ENSP00000361125	9606.ENSP00000340874	0	0	0	0	0.053	0	0	0.669	0.673
RNF20	TP53	1857797	1846083	9606.ENSP00000373772	9606.ENSP00000269305	0	0	0	0	0	0.36	0	0.509	0.672
LRRK2	NFKBIA	1848005	1842621	9606.ENSP00000298910	9606.ENSP00000216797	0	0	0	0	0.058	0.339	0	0.516	0.672
CCL20	CCL3	1853751	1843010	9606.ENSP00000351671	9606.ENSP00000225245	0	0	0	0	0.057	0	0	0.666	0.671
PTGS2	PTGER2	1854602	1843759	9606.ENSP00000356438	9606.ENSP00000245457	0	0	0	0	0	0	0	0.666	0.666
SAMD9	OAS2	1857120	1852576	9606.ENSP00000369292	9606.ENSP00000342278	0	0	0	0	0.614	0	0	0.169	0.666
MAFF	ATF3	1852928	1852803	9606.ENSP00000345393	9606.ENSP00000344352	0	0	0	0	0.44	0.191	0	0.322	0.666
TP53	JAG1	1846083	1844342	9606.ENSP00000269305	9606.ENSP00000254958	0	0	0	0	0.052	0	0	0.66	0.664
GIMAP5	GIMAP1	1853717	1848457	9606.ENSP00000351473	9606.ENSP00000302833	0	0	0	0.894	0.628	0	0	0.91	0.663
NR4A2	TP53	1852822	1846083	9606.ENSP00000344479	9606.ENSP00000269305	0	0	0	0	0	0	0	0.662	0.662
PLK3	LRRK2	1855637	1848005	9606.ENSP00000361275	9606.ENSP00000298910	0	0	0	0	0.055	0.514	0	0.325	0.662
JUN	THBS1	1855436	1844779	9606.ENSP00000360266	9606.ENSP00000260356	0	0	0	0	0	0	0	0.659	0.66
HIF1A	IL1B	1852062	1845335	9606.ENSP00000338018	9606.ENSP00000263341	0	0	0	0	0	0	0	0.66	0.66
XAF1	TNFSF10	1854224	1843591	9606.ENSP00000354822	9606.ENSP00000241261	0	0	0	0	0.416	0	0	0.44	0.659
VEGFA	FOS	1855611	1848822	9606.ENSP00000361125	9606.ENSP00000306245	0	0	0	0	0	0	0	0.658	0.658
VEGFA	IFNG	1855611	1843180	9606.ENSP00000361125	9606.ENSP00000229135	0	0	0	0	0	0	0	0.658	0.658
HSPA1B	RANBP2	1856350	1846837	9606.ENSP00000364801	9606.ENSP00000283195	0	0	0	0	0.102	0.292	0	0.504	0.657
DDIT3	NFIL3	1862449	1847898	9606.ENSP00000447803	9606.ENSP00000297689	0	0	0	0	0	0.628	0	0.116	0.657
ZFP36	GADD45B	1843925	1842495	9606.ENSP00000248673	9606.ENSP00000215631	0	0	0	0	0.611	0	0	0.143	0.653
FOS	ADM	1848822	1846549	9606.ENSP00000306245	9606.ENSP00000278175	0	0	0	0	0	0	0	0.652	0.652
PLK3	JUN	1855637	1855436	9606.ENSP00000361275	9606.ENSP00000360266	0	0	0	0	0.112	0	0	0.624	0.652
JUN	BCL2A1	1855436	1845978	9606.ENSP00000360266	9606.ENSP00000267953	0	0	0	0	0.053	0	0	0.646	0.651
GBP1	IFNG	1855263	1843180	9606.ENSP00000359504	9606.ENSP00000229135	0	0	0	0	0.053	0	0	0.645	0.649
ATF3	PMAIP1	1852803	1850799	9606.ENSP00000344352	9606.ENSP00000326119	0	0	0	0	0.099	0	0	0.625	0.648
FOS	SIK1	1848822	1846133	9606.ENSP00000306245	9606.ENSP00000270162	0	0	0	0	0.194	0	0	0.579	0.647
TNFAIP8L2	IGSF6	1854917	1846016	9606.ENSP00000357906	9606.ENSP00000268389	0	0	0	0	0.646	0	0	0	0.646
TLR7	IL8	1857265	1848852	9606.ENSP00000370034	9606.ENSP00000306512	0	0	0	0	0.055	0	0	0.639	0.644
HSPA1A	DPYD	1856351	1855189	9606.ENSP00000364802	9606.ENSP00000359211	0	0	0	0	0.099	0	0	0.621	0.644
SUCLA2	IDH1	1856910	1844837	9606.ENSP00000367923	9606.ENSP00000260985	0.12	0	0	0	0.324	0	0	0.45	0.644
IDI1	SC5DL	1857368	1845461	9606.ENSP00000370748	9606.ENSP00000264027	0	0	0	0	0.325	0	0	0.493	0.643
HSPA1B	DPYD	1856350	1855189	9606.ENSP00000364801	9606.ENSP00000359211	0	0	0	0	0.099	0	0	0.621	0.643
EGR3	FOS	1850005	1848822	9606.ENSP00000318057	9606.ENSP00000306245	0	0	0	0	0.352	0.066	0	0.456	0.642
CLK1	CCNL1	1859823	1847645	9606.ENSP00000394734	9606.ENSP00000295926	0	0	0	0	0.562	0	0	0.214	0.642
LRRK2	CSF1R	1848005	1847002	9606.ENSP00000298910	9606.ENSP00000286301	0.054	0	0	0.61	0.093	0.529	0	0.473	0.638
IL8	TNFAIP3	1848852	1843455	9606.ENSP00000306512	9606.ENSP00000237289	0	0	0	0	0.432	0	0	0.388	0.638
EGR3	FOSB	1850005	1843783	9606.ENSP00000318057	9606.ENSP00000245919	0	0	0	0	0.358	0.066	0	0.445	0.638
ZFP36	PPP1R15A	1843925	1842391	9606.ENSP00000248673	9606.ENSP00000200453	0	0	0	0	0.618	0	0	0.089	0.638
VEGFA	OLR1	1855611	1849145	9606.ENSP00000361125	9606.ENSP00000309124	0	0	0	0	0	0	0	0.637	0.637
IL1B	NAMPT	1845335	1842925	9606.ENSP00000263341	9606.ENSP00000222553	0	0	0	0	0.153	0	0	0.586	0.635
HCK	LRRK2	1856392	1848005	9606.ENSP00000365012	9606.ENSP00000298910	0.054	0	0	0.638	0.102	0.529	0	0.471	0.635
CXCL2	PTGS2	1861702	1854602	9606.ENSP00000427279	9606.ENSP00000356438	0	0	0	0	0.433	0	0	0.38	0.634
PTGS2	NFKBIA	1854602	1842621	9606.ENSP00000356438	9606.ENSP00000216797	0	0	0	0	0.053	0	0	0.63	0.634
TP53	PPP1R15A	1846083	1842391	9606.ENSP00000269305	9606.ENSP00000200453	0	0	0	0	0	0	0	0.633	0.633
NFIL3	ATF1	1847898	1845050	9606.ENSP00000297689	9606.ENSP00000262053	0	0	0	0	0.054	0.628	0	0	0.633
IRF2	IFNG	1858109	1843180	9606.ENSP00000377218	9606.ENSP00000229135	0	0	0	0	0.07	0	0	0.62	0.632
VEGFA	RB1	1855611	1845924	9606.ENSP00000361125	9606.ENSP00000267163	0	0	0	0	0	0	0	0.63	0.63
TP53	IDH1	1846083	1844837	9606.ENSP00000269305	9606.ENSP00000260985	0	0	0	0	0	0	0	0.63	0.63
VEGFA	HBEGF	1855611	1843270	9606.ENSP00000361125	9606.ENSP00000230990	0	0	0	0	0	0	0	0.628	0.628
PMAIP1	TNFSF10	1850799	1843591	9606.ENSP00000326119	9606.ENSP00000241261	0	0	0	0	0	0	0	0.628	0.628
ACADM	PDHB	1860801	1848936	9606.ENSP00000409612	9606.ENSP00000307241	0.049	0	0	0	0.196	0.103	0.435	0.185	0.627
DPYD	TXNDC9	1855189	1845514	9606.ENSP00000359211	9606.ENSP00000264255	0.073	0	0	0	0.064	0	0	0.605	0.627
LRRK2	MKKS	1848005	1843796	9606.ENSP00000298910	9606.ENSP00000246062	0	0	0	0	0.043	0.097	0	0.601	0.626
PRKACB	LRRK2	1855328	1848005	9606.ENSP00000359719	9606.ENSP00000298910	0	0	0	0.629	0.12	0.513	0	0.461	0.626
GIMAP4	FGL2	1844396	1843920	9606.ENSP00000255945	9606.ENSP00000248598	0	0	0	0	0.626	0	0	0	0.626
CD83	IL8	1856986	1848852	9606.ENSP00000368450	9606.ENSP00000306512	0	0	0	0	0.155	0	0	0.573	0.624
JUN	PPP1R15A	1855436	1842391	9606.ENSP00000360266	9606.ENSP00000200453	0	0	0	0	0.453	0	0	0.34	0.624
FOSL2	ATF1	1845606	1845050	9606.ENSP00000264716	9606.ENSP00000262053	0	0	0	0	0.051	0.52	0	0.24	0.624
HSPA1A	IL8	1856351	1848852	9606.ENSP00000364802	9606.ENSP00000306512	0	0	0	0	0	0	0	0.622	0.622
DPYD	PDE4B	1855189	1851429	9606.ENSP00000359211	9606.ENSP00000332116	0	0	0	0	0.292	0	0	0.489	0.622
GIMAP6	GIMAP1	1851247	1848457	9606.ENSP00000330374	9606.ENSP00000302833	0	0	0	0.896	0.596	0	0	0.587	0.62
CSF1R	FGL2	1847002	1843920	9606.ENSP00000286301	9606.ENSP00000248598	0	0	0	0	0.565	0.145	0	0.059	0.619
SMAD7	CDKN1A	1845078	1843736	9606.ENSP00000262158	9606.ENSP00000244741	0	0	0	0	0	0	0	0.619	0.619
HSD17B4	IDH1	1861507	1844837	9606.ENSP00000420914	9606.ENSP00000260985	0.064	0	0	0	0.259	0.417	0	0.167	0.619
HCK	IGSF6	1856392	1846016	9606.ENSP00000365012	9606.ENSP00000268389	0	0	0	0	0.619	0	0	0	0.619
CXCL2	TNFAIP3	1861702	1843455	9606.ENSP00000427279	9606.ENSP00000237289	0	0	0	0	0.446	0	0	0.339	0.618
TP53	IFNG	1846083	1843180	9606.ENSP00000269305	9606.ENSP00000229135	0	0	0	0	0	0	0	0.616	0.616
NR4A2	EGR3	1852822	1850005	9606.ENSP00000344479	9606.ENSP00000318057	0	0	0	0	0.282	0.121	0	0.441	0.616
SGK1	TP53	1854674	1846083	9606.ENSP00000356832	9606.ENSP00000269305	0	0	0	0	0	0	0	0.616	0.616
ACTL6A	LRRK2	1860014	1848005	9606.ENSP00000397552	9606.ENSP00000298910	0	0	0	0	0	0.256	0	0.504	0.615
FOS	TNFSF10	1848822	1843591	9606.ENSP00000306245	9606.ENSP00000241261	0	0	0	0	0.044	0	0	0.613	0.614
MNDA	IGSF6	1854743	1846016	9606.ENSP00000357123	9606.ENSP00000268389	0	0	0	0	0.614	0	0	0	0.614
RGS1	CCL3	1854596	1843010	9606.ENSP00000356429	9606.ENSP00000225245	0	0	0	0	0.543	0	0	0.186	0.612
C15orf48	ACSL1	1852480	1846727	9606.ENSP00000341610	9606.ENSP00000281455	0	0	0	0	0.055	0.604	0	0	0.61
MAFF	NFIL3	1852928	1847898	9606.ENSP00000345393	9606.ENSP00000297689	0	0	0	0	0.143	0.501	0	0.16	0.61
COA3	C15orf48	1854211	1852480	9606.ENSP00000354762	9606.ENSP00000341610	0	0	0	0	0	0.605	0	0	0.605
NDUFA8	C15orf48	1855985	1852480	9606.ENSP00000362873	9606.ENSP00000341610	0	0	0	0	0	0.605	0	0	0.605
HSPA1B	TP53	1856350	1846083	9606.ENSP00000364801	9606.ENSP00000269305	0	0	0	0	0.052	0.424	0	0.334	0.605
PTGS2	CYP1B1	1854602	1844805	9606.ENSP00000356438	9606.ENSP00000260630	0	0	0	0	0.057	0	0	0.599	0.605
JUN	ZFP36	1855436	1843925	9606.ENSP00000360266	9606.ENSP00000248673	0	0	0	0	0.393	0	0	0.375	0.604
IL1B	ZFP36	1845335	1843925	9606.ENSP00000263341	9606.ENSP00000248673	0	0	0	0	0.104	0	0	0.575	0.604
IGSF6	FGL2	1846016	1843920	9606.ENSP00000268389	9606.ENSP00000248598	0	0	0	0	0.603	0	0	0	0.603
IL1B	SMAD7	1845335	1845078	9606.ENSP00000263341	9606.ENSP00000262158	0	0	0	0	0	0	0	0.602	0.602
ACTL6A	JUN	1860014	1855436	9606.ENSP00000397552	9606.ENSP00000360266	0	0	0	0	0	0.195	0	0.524	0.601
GADD45B	PPP1R15A	1842495	1842391	9606.ENSP00000215631	9606.ENSP00000200453	0	0	0	0	0.418	0	0	0.339	0.6
JUN	ADM	1855436	1846549	9606.ENSP00000360266	9606.ENSP00000278175	0	0	0	0	0	0	0	0.6	0.6
SLC35B3	SLC35A1	1857070	1855056	9606.ENSP00000368981	9606.ENSP00000358565	0	0	0	0	0.279	0	0	0.467	0.599
IRF2	DDX58	1858109	1857110	9606.ENSP00000377218	9606.ENSP00000369213	0	0	0	0	0.052	0	0	0.595	0.599
PARP1	PMAIP1	1854450	1850799	9606.ENSP00000355759	9606.ENSP00000326119	0	0	0	0	0	0	0	0.598	0.598
VEGFA	ATF3	1855611	1852803	9606.ENSP00000361125	9606.ENSP00000344352	0	0	0	0	0	0	0	0.598	0.598
DUSP6	RB1	1846636	1845924	9606.ENSP00000279488	9606.ENSP00000267163	0	0	0	0	0.215	0	0	0.508	0.598
COMMD8	TXNDC9	1857400	1845514	9606.ENSP00000370984	9606.ENSP00000264255	0	0	0	0	0.596	0	0	0	0.596
FOSB	PPP1R15A	1843783	1842391	9606.ENSP00000245919	9606.ENSP00000200453	0	0	0	0	0.533	0	0	0.167	0.595
EEA1	CDKN1A	1849997	1843736	9606.ENSP00000317955	9606.ENSP00000244741	0	0	0	0	0	0.595	0	0	0.595
DDX58	NLRP3	1857110	1851990	9606.ENSP00000369213	9606.ENSP00000337383	0	0	0	0	0	0	0	0.595	0.595
VEGFA	CDKN1A	1855611	1843736	9606.ENSP00000361125	9606.ENSP00000244741	0	0	0	0	0	0	0	0.594	0.594
PTGS2	EREG	1854602	1843742	9606.ENSP00000356438	9606.ENSP00000244869	0	0	0	0	0.055	0	0	0.586	0.592
VEGFA	ZFP36	1855611	1843925	9606.ENSP00000361125	9606.ENSP00000248673	0	0	0	0	0	0	0	0.59	0.59
CDKN1A	PPP1R15A	1843736	1842391	9606.ENSP00000244741	9606.ENSP00000200453	0	0	0	0	0.132	0	0	0.547	0.59
PRKAR1A	LRRN3	1853711	1849482	9606.ENSP00000351410	9606.ENSP00000312001	0	0	0	0	0.055	0.197	0	0.503	0.589
TP53	SLC2A3	1846083	1842244	9606.ENSP00000269305	9606.ENSP00000075120	0	0	0	0	0	0	0	0.589	0.589
OAS1	TNFAIP3	1859322	1843455	9606.ENSP00000388001	9606.ENSP00000237289	0	0	0	0	0	0.511	0	0.191	0.587
LRRK2	PLK2	1848005	1846372	9606.ENSP00000298910	9606.ENSP00000274289	0	0	0	0.612	0.055	0.514	0	0.382	0.587
ZC3H12A	IL1B	1855826	1845335	9606.ENSP00000362174	9606.ENSP00000263341	0	0	0	0	0.266	0.36	0	0.182	0.583
DPYD	IDH1	1855189	1844837	9606.ENSP00000359211	9606.ENSP00000260985	0	0	0	0	0.053	0	0.435	0.283	0.583
FOS	CDKN1A	1848822	1843736	9606.ENSP00000306245	9606.ENSP00000244741	0	0	0	0	0.054	0	0	0.577	0.582
SGK1	LRRK2	1854674	1848005	9606.ENSP00000356832	9606.ENSP00000298910	0	0	0	0.628	0.056	0.5	0	0.431	0.582
AREG	IL1B	1845557	1845335	9606.ENSP00000264487	9606.ENSP00000263341	0	0	0	0	0.054	0	0	0.575	0.581
TP53	DUSP4	1846083	1843550	9606.ENSP00000269305	9606.ENSP00000240100	0	0	0	0	0	0.071	0	0.568	0.581
PARP1	HIF1A	1854450	1852062	9606.ENSP00000355759	9606.ENSP00000338018	0	0	0	0	0	0.36	0	0.371	0.581
VPS35	LRRK2	1848019	1848005	9606.ENSP00000299138	9606.ENSP00000298910	0	0	0	0	0.058	0.173	0	0.504	0.58
CDKN1A	GADD45B	1843736	1842495	9606.ENSP00000244741	9606.ENSP00000215631	0	0	0	0	0.132	0.36	0	0.304	0.58
TP53	MAP3K8	1846083	1845272	9606.ENSP00000269305	9606.ENSP00000263056	0	0	0	0	0	0	0	0.579	0.579
GBP1	IFI16	1855263	1854740	9606.ENSP00000359504	9606.ENSP00000357113	0	0	0	0	0.365	0	0	0.364	0.579
PRKACB	LRRN3	1855328	1849482	9606.ENSP00000359719	9606.ENSP00000312001	0	0	0	0	0.054	0.178	0	0.503	0.579
HIF1A	RB1	1852062	1845924	9606.ENSP00000338018	9606.ENSP00000267163	0	0	0	0	0	0.36	0	0.368	0.578
TLR7	IL1B	1857265	1845335	9606.ENSP00000370034	9606.ENSP00000263341	0	0	0	0	0.053	0	0	0.573	0.578
JUN	TNFSF10	1855436	1843591	9606.ENSP00000360266	9606.ENSP00000241261	0	0	0	0	0	0	0	0.578	0.578
VEGFA	PARP1	1855611	1854450	9606.ENSP00000361125	9606.ENSP00000355759	0	0	0	0	0	0	0	0.577	0.577
SLC2A14	TP53	1858405	1846083	9606.ENSP00000379834	9606.ENSP00000269305	0	0	0	0	0	0	0	0.577	0.577
MNDA	FGL2	1854743	1843920	9606.ENSP00000357123	9606.ENSP00000248598	0	0	0	0	0.575	0	0	0.046	0.577
PRKAR1A	PDE4B	1853711	1851429	9606.ENSP00000351410	9606.ENSP00000332116	0	0	0	0	0.153	0	0	0.521	0.576
RGCC	RB1	1857014	1845924	9606.ENSP00000368664	9606.ENSP00000267163	0	0	0	0	0	0	0	0.576	0.576
DDIT3	TP53	1862449	1846083	9606.ENSP00000447803	9606.ENSP00000269305	0	0	0	0	0	0	0	0.575	0.575
DPYD	DCK	1855189	1847023	9606.ENSP00000359211	9606.ENSP00000286648	0	0	0	0	0.132	0	0	0.529	0.574
OAS2	TNFAIP3	1852576	1843455	9606.ENSP00000342278	9606.ENSP00000237289	0	0	0	0	0	0.511	0	0.159	0.571
DUSP10	LRRK2	1854467	1848005	9606.ENSP00000355866	9606.ENSP00000298910	0	0	0	0	0.054	0.308	0	0.396	0.57
LRRK2	DUSP2	1848005	1847145	9606.ENSP00000298910	9606.ENSP00000288943	0	0	0	0	0.054	0.308	0	0.396	0.57
LRRK2	DUSP4	1848005	1843550	9606.ENSP00000298910	9606.ENSP00000240100	0	0	0	0	0.054	0.308	0	0.396	0.57
SUCLA2	PDHB	1856910	1848936	9606.ENSP00000367923	9606.ENSP00000307241	0	0	0	0	0.348	0	0	0.365	0.569
RANBP2	TP53	1846837	1846083	9606.ENSP00000283195	9606.ENSP00000269305	0	0	0	0	0	0.366	0	0.347	0.569
IL1B	TNFAIP3	1845335	1843455	9606.ENSP00000263341	9606.ENSP00000237289	0	0	0	0	0.295	0.145	0	0.341	0.568
PRF1	IFNG	1849900	1843180	9606.ENSP00000316746	9606.ENSP00000229135	0	0	0	0	0.104	0	0	0.538	0.568
PRKACB	CCNL1	1855328	1847645	9606.ENSP00000359719	9606.ENSP00000295926	0	0	0	0	0	0.067	0.54	0.074	0.567
SAMD9	DDX58	1857120	1857110	9606.ENSP00000369292	9606.ENSP00000369213	0	0	0	0	0.545	0	0	0.088	0.567
LRRK2	DUSP6	1848005	1846636	9606.ENSP00000298910	9606.ENSP00000279488	0	0	0	0	0.046	0.308	0	0.396	0.566
DUSP7	LRRK2	1861273	1848005	9606.ENSP00000417183	9606.ENSP00000298910	0	0	0	0	0.046	0.308	0	0.396	0.566
CCR2	IFNG	1847341	1843180	9606.ENSP00000292301	9606.ENSP00000229135	0	0	0	0	0.078	0	0	0.547	0.566
JAG1	IFNG	1844342	1843180	9606.ENSP00000254958	9606.ENSP00000229135	0	0	0	0	0	0	0	0.564	0.564
IL1R2	IFNG	1851300	1843180	9606.ENSP00000330959	9606.ENSP00000229135	0	0	0	0	0	0	0	0.563	0.563
OAS1	SAMD9	1859322	1857120	9606.ENSP00000388001	9606.ENSP00000369292	0	0	0	0	0.466	0	0	0.214	0.563
IFI16	TNFSF10	1854740	1843591	9606.ENSP00000357113	9606.ENSP00000241261	0	0	0	0	0.137	0	0	0.512	0.561
PLAUR	IL8	1852201	1848852	9606.ENSP00000339328	9606.ENSP00000306512	0	0	0	0	0.242	0	0	0.441	0.559
CSF1R	HBEGF	1847002	1843270	9606.ENSP00000286301	9606.ENSP00000230990	0	0	0	0	0	0	0	0.558	0.558
FOS	MAP3K8	1848822	1845272	9606.ENSP00000306245	9606.ENSP00000263056	0	0	0	0	0	0	0	0.557	0.557
LRRK2	TXNDC9	1848005	1845514	9606.ENSP00000298910	9606.ENSP00000264255	0	0	0	0	0.055	0.293	0	0.388	0.555
SAMD9	GBP1	1857120	1855263	9606.ENSP00000369292	9606.ENSP00000359504	0	0	0	0	0.442	0	0	0.235	0.555
CD83	IL1B	1856986	1845335	9606.ENSP00000368450	9606.ENSP00000263341	0	0	0	0	0.171	0	0	0.485	0.555
TP53	TNFAIP3	1846083	1843455	9606.ENSP00000269305	9606.ENSP00000237289	0	0	0	0	0	0.36	0	0.331	0.553
VEGFA	NR4A2	1855611	1852822	9606.ENSP00000361125	9606.ENSP00000344479	0	0	0	0	0	0	0	0.553	0.553
FOS	CSF1R	1848822	1847002	9606.ENSP00000306245	9606.ENSP00000286301	0	0	0	0	0	0.09	0	0.529	0.553
PARP1	RB1	1854450	1845924	9606.ENSP00000355759	9606.ENSP00000267163	0	0	0	0	0.086	0	0	0.532	0.553
PTGS2	NFIL3	1854602	1847898	9606.ENSP00000356438	9606.ENSP00000297689	0	0	0	0	0.142	0	0	0.499	0.553
NR4A2	SIK1	1852822	1846133	9606.ENSP00000344479	9606.ENSP00000270162	0	0	0	0	0.432	0	0	0.245	0.552
GABARAPL3	OAS2	1859764	1852576	9606.ENSP00000394008	9606.ENSP00000342278	0	0	0	0	0.122	0.054	0	0.503	0.551
GABARAPL3	OAS1	1859764	1859322	9606.ENSP00000394008	9606.ENSP00000388001	0	0	0	0	0.122	0.054	0	0.503	0.551
OAS2	GABARAPL1	1852576	1845870	9606.ENSP00000342278	9606.ENSP00000266458	0	0	0	0	0.122	0.054	0	0.503	0.551
OAS1	GABARAPL1	1859322	1845870	9606.ENSP00000388001	9606.ENSP00000266458	0	0	0	0	0.122	0.054	0	0.503	0.551
IL8	TLR8	1848852	1842687	9606.ENSP00000306512	9606.ENSP00000218032	0	0	0	0	0.055	0	0	0.542	0.549
HIF1A	PMAIP1	1852062	1850799	9606.ENSP00000338018	9606.ENSP00000326119	0	0	0	0	0	0	0	0.549	0.549
OAS2	NRIP3	1852576	1849270	9606.ENSP00000342278	9606.ENSP00000310205	0	0	0	0	0.054	0.393	0	0.274	0.546
OAS1	NRIP3	1859322	1849270	9606.ENSP00000388001	9606.ENSP00000310205	0	0	0	0	0.054	0.393	0	0.274	0.546
DUSP2	TP53	1847145	1846083	9606.ENSP00000288943	9606.ENSP00000269305	0	0	0	0	0	0.071	0	0.53	0.545
CCR2	IL1B	1847341	1845335	9606.ENSP00000292301	9606.ENSP00000263341	0	0	0	0	0.053	0	0	0.54	0.545
DUSP10	FOS	1854467	1848822	9606.ENSP00000355866	9606.ENSP00000306245	0	0	0	0	0.092	0.389	0	0.243	0.543
DPYD	SLC2A3	1855189	1842244	9606.ENSP00000359211	9606.ENSP00000075120	0.071	0.051	0	0	0.095	0	0	0.494	0.543
JUN	GADD45B	1855436	1842495	9606.ENSP00000360266	9606.ENSP00000215631	0	0	0	0	0.216	0	0	0.44	0.542
ATF3	AREG	1852803	1845557	9606.ENSP00000344352	9606.ENSP00000264487	0	0	0	0	0.053	0	0	0.535	0.542
CD83	IFNG	1856986	1843180	9606.ENSP00000368450	9606.ENSP00000229135	0	0	0	0	0.053	0	0	0.535	0.541
TLR5	IL1B	1852287	1845335	9606.ENSP00000340089	9606.ENSP00000263341	0	0	0	0	0	0	0	0.54	0.54
GBP1	TNFSF10	1855263	1843591	9606.ENSP00000359504	9606.ENSP00000241261	0	0	0	0	0.418	0	0	0.243	0.54
FOS	NFKBIA	1848822	1842621	9606.ENSP00000306245	9606.ENSP00000216797	0	0	0	0	0.101	0.051	0	0.504	0.54
TLR7	IFNG	1857265	1843180	9606.ENSP00000370034	9606.ENSP00000229135	0	0	0	0	0	0	0	0.539	0.539
OLR1	HBEGF	1849145	1843270	9606.ENSP00000309124	9606.ENSP00000230990	0	0	0	0	0	0	0	0.537	0.537
PTPN6	BLNK	1859578	1842996	9606.ENSP00000391592	9606.ENSP00000224337	0	0	0	0	0.086	0.36	0	0.272	0.537
TLR7	CD83	1857265	1856986	9606.ENSP00000370034	9606.ENSP00000368450	0	0	0	0	0.055	0	0	0.531	0.537
SAMD9L	TNFSF10	1850811	1843591	9606.ENSP00000326247	9606.ENSP00000241261	0	0	0	0	0.533	0	0	0.048	0.536
THBD	VEGFA	1856612	1855611	9606.ENSP00000366307	9606.ENSP00000361125	0	0	0	0	0.053	0	0	0.53	0.535
OAS1	RANBP2	1859322	1846837	9606.ENSP00000388001	9606.ENSP00000283195	0	0	0	0	0.073	0.075	0	0.501	0.534
OAS2	RANBP2	1852576	1846837	9606.ENSP00000342278	9606.ENSP00000283195	0	0	0	0	0.073	0.075	0	0.501	0.534
SMAD7	JAG1	1845078	1844342	9606.ENSP00000262158	9606.ENSP00000254958	0	0	0	0	0.053	0.066	0	0.516	0.534
SAMD9	XAF1	1857120	1854224	9606.ENSP00000369292	9606.ENSP00000354822	0	0	0	0	0.436	0	0	0.206	0.533
DPYD	CTBP2	1855189	1849465	9606.ENSP00000359211	9606.ENSP00000311825	0.065	0	0	0	0.073	0	0	0.504	0.532
RIT1	MSRB1	1854779	1854294	9606.ENSP00000357306	9606.ENSP00000355084	0	0	0	0	0	0	0	0.531	0.531
CX3CR1	CSF1R	1853665	1847002	9606.ENSP00000351059	9606.ENSP00000286301	0	0	0	0	0.096	0	0	0.502	0.53
ACTL6A	FOS	1860014	1848822	9606.ENSP00000397552	9606.ENSP00000306245	0	0	0	0	0.052	0	0	0.525	0.53
PLAUR	IL1B	1852201	1845335	9606.ENSP00000339328	9606.ENSP00000263341	0	0	0	0	0.337	0	0	0.32	0.53
TLR5	NLRP3	1852287	1851990	9606.ENSP00000340089	9606.ENSP00000337383	0	0	0	0	0.109	0	0	0.494	0.53
IL1B	OSM	1845335	1842507	9606.ENSP00000263341	9606.ENSP00000215781	0	0	0	0	0.19	0	0	0.444	0.53
RB1	MSH2	1845924	1843341	9606.ENSP00000267163	9606.ENSP00000233146	0	0	0	0	0.24	0	0	0.407	0.53
RGCC	CDKN1A	1857014	1843736	9606.ENSP00000368664	9606.ENSP00000244741	0	0	0	0	0	0	0	0.527	0.527
PARP1	ARFIP1	1854450	1847754	9606.ENSP00000355759	9606.ENSP00000296557	0	0	0	0	0	0	0	0.526	0.526
PMAIP1	CDKN1A	1850799	1843736	9606.ENSP00000326119	9606.ENSP00000244741	0	0	0	0	0	0	0	0.526	0.526
ZFP36	NFKBIA	1843925	1842621	9606.ENSP00000248673	9606.ENSP00000216797	0	0	0	0	0.451	0	0	0.172	0.526
SERPINB2	IFNG	1848072	1843180	9606.ENSP00000299502	9606.ENSP00000229135	0	0	0	0	0	0	0	0.526	0.526
JUN	HBEGF	1855436	1843270	9606.ENSP00000360266	9606.ENSP00000230990	0	0	0	0	0.121	0	0	0.482	0.525
CCL20	IFNG	1853751	1843180	9606.ENSP00000351671	9606.ENSP00000229135	0	0	0	0	0	0	0	0.524	0.524
IL8	OSM	1848852	1842507	9606.ENSP00000306512	9606.ENSP00000215781	0	0	0	0	0.122	0	0	0.481	0.524
SLC2A14	DPYD	1858405	1855189	9606.ENSP00000379834	9606.ENSP00000359211	0.071	0.043	0	0	0.066	0	0	0.494	0.523
VEGFA	EGR3	1855611	1850005	9606.ENSP00000361125	9606.ENSP00000318057	0	0	0	0	0	0	0	0.522	0.522
TP53	MAD1L1	1846083	1845817	9606.ENSP00000269305	9606.ENSP00000265854	0	0	0	0	0	0	0	0.522	0.522
HIBCH	CRYZ	1853891	1852214	9606.ENSP00000352706	9606.ENSP00000339399	0	0	0	0	0.144	0	0.411	0.127	0.521
TUBB2A	CETN3	1857206	1846832	9606.ENSP00000369703	9606.ENSP00000283122	0	0	0	0	0.057	0.144	0	0.455	0.521
NLRC4	RIPK2	1854083	1842798	9606.ENSP00000354159	9606.ENSP00000220751	0	0	0	0	0	0	0	0.521	0.521
TLR7	NLRP3	1857265	1851990	9606.ENSP00000370034	9606.ENSP00000337383	0	0	0	0	0.049	0	0	0.517	0.521
STX7	VPS35	1854689	1848019	9606.ENSP00000356918	9606.ENSP00000299138	0	0	0	0	0.196	0.05	0	0.421	0.52
TLR5	RIPK2	1852287	1842798	9606.ENSP00000340089	9606.ENSP00000220751	0.05	0	0	0	0	0.173	0	0.436	0.518
CXCL3	CCL3	1847662	1843010	9606.ENSP00000296026	9606.ENSP00000225245	0	0	0	0	0.085	0	0	0.495	0.518
IFNG	NFKBIA	1843180	1842621	9606.ENSP00000229135	9606.ENSP00000216797	0	0	0	0	0	0	0	0.516	0.516
CCR2	CSF1R	1847341	1847002	9606.ENSP00000292301	9606.ENSP00000286301	0	0	0	0	0.053	0.048	0	0.506	0.516
LRRN3	RANBP2	1849482	1846837	9606.ENSP00000312001	9606.ENSP00000283195	0	0	0	0	0.092	0.338	0	0.259	0.515
PTPN6	PTS	1859578	1846670	9606.ENSP00000391592	9606.ENSP00000280362	0	0	0	0	0	0	0	0.515	0.515
PTPN6	FCRL3	1859578	1854756	9606.ENSP00000391592	9606.ENSP00000357167	0	0	0	0	0	0.335	0	0.299	0.514
DDX58	IFI16	1857110	1854740	9606.ENSP00000369213	9606.ENSP00000357113	0	0	0	0	0.12	0	0	0.47	0.513
IL1B	JAG1	1845335	1844342	9606.ENSP00000263341	9606.ENSP00000254958	0	0	0	0	0	0	0	0.512	0.512
CRYZ	PDHB	1852214	1848936	9606.ENSP00000339399	9606.ENSP00000307241	0	0	0	0	0.111	0	0.435	0.104	0.511
FOS	ATF1	1848822	1845050	9606.ENSP00000306245	9606.ENSP00000262053	0	0	0	0	0.051	0.074	0	0.486	0.509
IL8	BCL2A1	1848852	1845978	9606.ENSP00000306512	9606.ENSP00000267953	0	0	0	0	0.285	0	0	0.342	0.509
TLR7	CCL3	1857265	1843010	9606.ENSP00000370034	9606.ENSP00000225245	0	0	0	0	0.054	0	0	0.503	0.509
HSD17B4	PDHB	1861507	1848936	9606.ENSP00000420914	9606.ENSP00000307241	0.062	0	0	0	0.133	0	0.435	0.056	0.509
NFKBIA	GADD45B	1842621	1842495	9606.ENSP00000216797	9606.ENSP00000215631	0	0	0	0	0.259	0	0	0.364	0.509
VEGFA	JAG1	1855611	1844342	9606.ENSP00000361125	9606.ENSP00000254958	0	0	0	0	0.052	0	0	0.504	0.509
THBD	IL8	1856612	1848852	9606.ENSP00000366307	9606.ENSP00000306512	0	0	0	0	0.054	0	0	0.502	0.508
ZC3H12A	TNFAIP3	1855826	1843455	9606.ENSP00000362174	9606.ENSP00000237289	0	0	0	0	0.433	0	0	0.167	0.508
OMA1	NLRC4	1855439	1854083	9606.ENSP00000360270	9606.ENSP00000354159	0	0	0	0	0.071	0	0	0.492	0.508
NFIL3	NAMPT	1847898	1842925	9606.ENSP00000297689	9606.ENSP00000222553	0	0	0	0	0.361	0	0	0.261	0.508
CREM	TAF4	1845738	1844180	9606.ENSP00000265372	9606.ENSP00000252996	0	0	0	0	0	0.36	0	0.261	0.507
IRS2	TNFSF10	1856394	1843591	9606.ENSP00000365016	9606.ENSP00000241261	0	0	0	0	0	0	0	0.507	0.507
HSD17B4	CRYZ	1861507	1852214	9606.ENSP00000420914	9606.ENSP00000339399	0	0	0	0	0.055	0	0.435	0.151	0.507
HSPA1A	JUN	1856351	1855436	9606.ENSP00000364802	9606.ENSP00000360266	0	0	0	0	0.1	0.065	0	0.46	0.506
SIK1	CREM	1846133	1845738	9606.ENSP00000270162	9606.ENSP00000265372	0	0	0	0	0.053	0	0	0.499	0.506
HCK	CSF1R	1856392	1847002	9606.ENSP00000365012	9606.ENSP00000286301	0	0	0	0.705	0.456	0	0	0.342	0.506
DDX58	TLR5	1857110	1852287	9606.ENSP00000369213	9606.ENSP00000340089	0	0	0	0	0.051	0	0	0.501	0.506
CD1D	IFNG	1854753	1843180	9606.ENSP00000357153	9606.ENSP00000229135	0	0	0	0	0	0	0	0.506	0.506
FOS	DUSP6	1848822	1846636	9606.ENSP00000306245	9606.ENSP00000279488	0	0	0	0	0.136	0.117	0	0.403	0.505
DUSP6	PLK2	1846636	1846372	9606.ENSP00000279488	9606.ENSP00000274289	0	0	0	0	0.181	0.292	0	0.215	0.505
IL1B	BHLHE40	1845335	1844442	9606.ENSP00000263341	9606.ENSP00000256495	0	0	0	0	0	0	0	0.505	0.505
VEGFA	CCR2	1855611	1847341	9606.ENSP00000361125	9606.ENSP00000292301	0	0	0	0	0	0	0	0.505	0.505
DDX58	IL8	1857110	1848852	9606.ENSP00000369213	9606.ENSP00000306512	0	0	0	0	0	0	0	0.505	0.505
VEGFA	AREG	1855611	1845557	9606.ENSP00000361125	9606.ENSP00000264487	0	0	0	0	0	0	0	0.504	0.504
CDKN1A	TNFSF10	1843736	1843591	9606.ENSP00000244741	9606.ENSP00000241261	0	0	0	0	0	0	0	0.504	0.504
TP53	SAMHD1	1846083	1845231	9606.ENSP00000269305	9606.ENSP00000262878	0	0	0	0	0	0	0	0.503	0.503
FOS	DUSP4	1848822	1843550	9606.ENSP00000306245	9606.ENSP00000240100	0	0	0	0	0.241	0.119	0	0.316	0.503
TUBB2A	PLK2	1857206	1846372	9606.ENSP00000369703	9606.ENSP00000274289	0	0	0	0	0.072	0.178	0	0.401	0.503
RGS1	ZFP36	1854596	1843925	9606.ENSP00000356429	9606.ENSP00000248673	0	0	0	0	0.242	0	0	0.371	0.503
MPLKIP	PPIF	1848650	1843008	9606.ENSP00000304553	9606.ENSP00000225174	0	0	0	0	0	0.503	0	0	0.503
NLRP3	IL8	1851990	1848852	9606.ENSP00000337383	9606.ENSP00000306512	0	0	0	0	0	0	0	0.502	0.502
OMA1	DCK	1855439	1847023	9606.ENSP00000360270	9606.ENSP00000286648	0	0	0	0	0.077	0	0	0.483	0.502
CD83	CCL20	1856986	1853751	9606.ENSP00000368450	9606.ENSP00000351671	0	0	0	0	0.147	0	0	0.44	0.502
ACSL1	CYP1B1	1846727	1844805	9606.ENSP00000281455	9606.ENSP00000260630	0	0	0	0	0.124	0.087	0.384	0.107	0.501
TCL1A	NFKBIA	1859012	1842621	9606.ENSP00000385036	9606.ENSP00000216797	0	0	0	0	0	0	0	0.501	0.501
IL8	THBS1	1848852	1844779	9606.ENSP00000306512	9606.ENSP00000260356	0	0	0	0	0	0	0	0.501	0.501
VPS35	DNAJC13	1848019	1844825	9606.ENSP00000299138	9606.ENSP00000260818	0	0	0	0	0.174	0	0	0.419	0.5
LRRK2	CETN3	1848005	1846832	9606.ENSP00000298910	9606.ENSP00000283122	0	0	0	0	0.055	0.112	0	0.452	0.499
TP53INP2	TP53	1856183	1846083	9606.ENSP00000363942	9606.ENSP00000269305	0	0	0	0	0	0.097	0	0.468	0.499
RGPD2	NXT1	1858576	1844345	9606.ENSP00000381214	9606.ENSP00000254998	0	0	0	0	0.058	0.293	0	0.308	0.499
DCK	ATF1	1847023	1845050	9606.ENSP00000286648	9606.ENSP00000262053	0	0	0	0	0.096	0	0	0.467	0.497
CCL20	TNFAIP3	1853751	1843455	9606.ENSP00000351671	9606.ENSP00000237289	0	0	0	0	0.285	0	0	0.325	0.497
TLR5	NFKBIA	1852287	1842621	9606.ENSP00000340089	9606.ENSP00000216797	0	0	0	0	0	0.12	0	0.452	0.497
PTGS2	CDKN1A	1854602	1843736	9606.ENSP00000356438	9606.ENSP00000244741	0	0	0	0	0.054	0	0	0.49	0.496
PTPN6	IRS2	1859578	1856394	9606.ENSP00000391592	9606.ENSP00000365016	0	0	0	0	0	0.382	0	0.216	0.496
NLRP3	RIPK2	1851990	1842798	9606.ENSP00000337383	9606.ENSP00000220751	0	0	0	0	0.056	0	0	0.488	0.496
HCK	PLAUR	1856392	1852201	9606.ENSP00000365012	9606.ENSP00000339328	0	0	0	0	0.103	0.36	0	0.192	0.496
FOS	HBEGF	1848822	1843270	9606.ENSP00000306245	9606.ENSP00000230990	0	0	0	0	0.13	0	0	0.443	0.495
VEGFA	NR4A3	1855611	1851549	9606.ENSP00000361125	9606.ENSP00000333122	0	0	0	0	0	0	0	0.495	0.495
FOS	OSM	1848822	1842507	9606.ENSP00000306245	9606.ENSP00000215781	0	0	0	0	0.134	0	0	0.441	0.495
HSPA1A	PPIF	1856351	1843008	9606.ENSP00000364802	9606.ENSP00000225174	0	0	0	0	0.073	0.111	0	0.436	0.494
MAFF	IL1B	1852928	1845335	9606.ENSP00000345393	9606.ENSP00000263341	0	0	0	0	0.072	0	0	0.476	0.493
HSPA1A	AHSA1	1856351	1842603	9606.ENSP00000364802	9606.ENSP00000216479	0	0	0	0	0.244	0.141	0	0.282	0.493
GBP1	TP53	1855263	1846083	9606.ENSP00000359504	9606.ENSP00000269305	0	0	0	0	0	0	0	0.492	0.492
HIF1A	IL8	1852062	1848852	9606.ENSP00000338018	9606.ENSP00000306512	0	0	0	0	0.042	0	0	0.492	0.492
CXCL3	IL1B	1847662	1845335	9606.ENSP00000296026	9606.ENSP00000263341	0	0	0	0	0.189	0	0	0.399	0.492
HIBCH	ACSL1	1853891	1846727	9606.ENSP00000352706	9606.ENSP00000281455	0.309	0	0	0	0.141	0	0.112	0.15	0.492
TLR7	GADD45B	1857265	1842495	9606.ENSP00000370034	9606.ENSP00000215631	0	0	0	0	0	0	0	0.492	0.491
RGS1	MEF2C	1854596	1852378	9606.ENSP00000356429	9606.ENSP00000340874	0	0	0	0	0.049	0	0	0.487	0.491
TNFSF10	PPP1R15A	1843591	1842391	9606.ENSP00000241261	9606.ENSP00000200453	0	0	0	0	0	0	0	0.49	0.49
PTPN6	CSF1R	1859578	1847002	9606.ENSP00000391592	9606.ENSP00000286301	0	0	0	0	0.095	0.191	0	0.359	0.49
ATF3	FOSB	1852803	1843783	9606.ENSP00000344352	9606.ENSP00000245919	0	0	0	0.748	0.422	0	0	0.493	0.49
PTGS2	PARP1	1854602	1854450	9606.ENSP00000356438	9606.ENSP00000355759	0	0	0	0	0	0	0	0.49	0.489
ZFP36	CCL3	1843925	1843010	9606.ENSP00000248673	9606.ENSP00000225245	0	0	0	0	0.122	0.359	0	0.165	0.489
TUBB2A	PLK3	1857206	1855637	9606.ENSP00000369703	9606.ENSP00000361275	0	0	0	0	0.072	0.178	0	0.385	0.489
C4orf34	MITD1	1847650	1847165	9606.ENSP00000295958	9606.ENSP00000289359	0	0	0	0	0	0	0	0.489	0.489
HSPA1A	FOS	1856351	1848822	9606.ENSP00000364802	9606.ENSP00000306245	0	0	0	0	0.1	0.085	0	0.429	0.489
RB1	CBX1	1845924	1843036	9606.ENSP00000267163	9606.ENSP00000225603	0	0	0	0	0	0.363	0	0.23	0.489
TXNDC9	MKKS	1845514	1843796	9606.ENSP00000264255	9606.ENSP00000246062	0.057	0	0	0	0.093	0.292	0	0.254	0.488
PRKACB	RIT1	1855328	1854779	9606.ENSP00000359719	9606.ENSP00000357306	0	0	0	0	0.084	0.162	0	0.385	0.487
PLK3	DUSP6	1855637	1846636	9606.ENSP00000361275	9606.ENSP00000279488	0	0	0	0	0.204	0.292	0	0.161	0.487
CD83	TNFRSF17	1856986	1842219	9606.ENSP00000368450	9606.ENSP00000053243	0	0	0	0	0	0	0	0.487	0.487
PLK2	DBF4	1846372	1845796	9606.ENSP00000274289	9606.ENSP00000265728	0	0	0	0	0.071	0.184	0	0.378	0.487
RIT1	LRRN3	1854779	1849482	9606.ENSP00000357306	9606.ENSP00000312001	0.057	0	0	0	0.056	0.147	0	0.403	0.486
NLRP3	CSF1R	1851990	1847002	9606.ENSP00000337383	9606.ENSP00000286301	0	0	0	0	0.407	0	0	0.166	0.485
NFIL3	AREG	1847898	1845557	9606.ENSP00000297689	9606.ENSP00000264487	0	0	0	0	0	0	0	0.484	0.484
PLK3	RACGAP1	1855637	1849236	9606.ENSP00000361275	9606.ENSP00000309871	0	0	0	0	0.42	0	0	0.145	0.483
JUN	CSF1R	1855436	1847002	9606.ENSP00000360266	9606.ENSP00000286301	0	0	0	0	0	0.102	0	0.447	0.483
JMJD6	TP53	1859772	1846083	9606.ENSP00000394085	9606.ENSP00000269305	0	0	0	0	0	0.285	0	0.304	0.481
PDE4B	LRRN3	1851429	1849482	9606.ENSP00000332116	9606.ENSP00000312001	0	0	0	0	0.052	0.073	0	0.457	0.481
DDIT3	PARP1	1862449	1854450	9606.ENSP00000447803	9606.ENSP00000355759	0	0	0	0	0	0	0	0.481	0.481
CXCL2	NFKBIA	1861702	1842621	9606.ENSP00000427279	9606.ENSP00000216797	0	0	0	0	0.239	0	0	0.345	0.48
CSF1R	GIMAP4	1847002	1844396	9606.ENSP00000286301	9606.ENSP00000255945	0	0	0	0	0.479	0	0	0	0.479
FCAR	IFNG	1853202	1843180	9606.ENSP00000347714	9606.ENSP00000229135	0	0	0	0	0	0	0	0.478	0.478
ECHDC1	ACSL1	1862038	1846727	9606.ENSP00000436585	9606.ENSP00000281455	0.309	0	0	0	0.141	0	0.112	0.128	0.478
SGK1	FOS	1854674	1848822	9606.ENSP00000356832	9606.ENSP00000306245	0	0	0	0	0.14	0.121	0	0.364	0.478
CRYZ	CYP1B1	1852214	1844805	9606.ENSP00000339399	9606.ENSP00000260630	0	0	0	0	0.042	0	0	0.477	0.477
HSPA1A	TXNDC9	1856351	1845514	9606.ENSP00000364802	9606.ENSP00000264255	0.048	0	0	0	0.1	0.14	0	0.374	0.477
NLRP3	TLR8	1851990	1842687	9606.ENSP00000337383	9606.ENSP00000218032	0	0	0	0	0.128	0	0	0.424	0.477
PLK3	DUSP2	1855637	1847145	9606.ENSP00000361275	9606.ENSP00000288943	0	0	0	0	0.164	0.292	0	0.187	0.477
CCL3L3	CCR2	1856854	1847341	9606.ENSP00000367605	9606.ENSP00000292301	0	0	0	0	0.057	0.145	0	0.402	0.476
MAT2B	UGDH	1850737	1850153	9606.ENSP00000325425	9606.ENSP00000319501	0.309	0	0	0	0	0.17	0	0.158	0.476
PARP1	MSH2	1854450	1843341	9606.ENSP00000355759	9606.ENSP00000233146	0	0	0	0	0.245	0	0	0.334	0.476
DPYD	MSRB1	1855189	1854294	9606.ENSP00000359211	9606.ENSP00000355084	0.064	0	0	0	0.062	0	0	0.451	0.475
TLR7	RIPK2	1857265	1842798	9606.ENSP00000370034	9606.ENSP00000220751	0.05	0	0	0	0	0.173	0	0.386	0.475
PFKFB3	SLC2A3	1857093	1842244	9606.ENSP00000369100	9606.ENSP00000075120	0.048	0	0	0	0.12	0	0	0.422	0.474
ECHDC1	CRYZ	1862038	1852214	9606.ENSP00000436585	9606.ENSP00000339399	0	0	0	0	0.052	0	0.411	0.134	0.474
NR4A3	EGR3	1851549	1850005	9606.ENSP00000333122	9606.ENSP00000318057	0	0	0	0	0.187	0.121	0	0.322	0.474
NEK7	NLRP3	1854578	1851990	9606.ENSP00000356355	9606.ENSP00000337383	0	0	0	0	0.061	0	0	0.462	0.473
PIGA	FCAR	1857225	1853202	9606.ENSP00000369820	9606.ENSP00000347714	0	0	0	0	0	0	0	0.473	0.473
DUSP2	ZFP36	1847145	1843925	9606.ENSP00000288943	9606.ENSP00000248673	0	0	0	0	0.099	0.397	0	0.105	0.472
HSPA1A	NFKBIA	1856351	1842621	9606.ENSP00000364802	9606.ENSP00000216797	0.056	0	0	0	0	0.221	0	0.339	0.472
TP53	AREG	1846083	1845557	9606.ENSP00000269305	9606.ENSP00000264487	0	0	0	0	0	0	0	0.472	0.472
ECHDC1	IDH1	1862038	1844837	9606.ENSP00000436585	9606.ENSP00000260985	0	0	0	0	0.214	0	0	0.355	0.471
TNFSF10	TNFAIP3	1843591	1843455	9606.ENSP00000241261	9606.ENSP00000237289	0	0	0	0	0	0.357	0	0.211	0.471
JUN	SAMHD1	1855436	1845231	9606.ENSP00000360266	9606.ENSP00000262878	0	0	0	0	0	0	0	0.47	0.47
IL1B	TNFSF10	1845335	1843591	9606.ENSP00000263341	9606.ENSP00000241261	0	0	0	0	0	0	0	0.47	0.47
SERPINB2	RB1	1848072	1845924	9606.ENSP00000299502	9606.ENSP00000267163	0	0	0	0	0	0.36	0	0.205	0.469
OAS1	TNFSF10	1859322	1843591	9606.ENSP00000388001	9606.ENSP00000241261	0	0	0	0	0.298	0	0	0.275	0.469
HSPA1A	LRRK2	1856351	1848005	9606.ENSP00000364802	9606.ENSP00000298910	0	0	0	0	0.052	0.17	0	0.379	0.469
IGSF6	TLR8	1846016	1842687	9606.ENSP00000268389	9606.ENSP00000218032	0	0	0	0	0.468	0	0	0	0.468
TP53	CYP1B1	1846083	1844805	9606.ENSP00000269305	9606.ENSP00000260630	0	0	0	0	0	0.088	0	0.44	0.467
ATF3	GADD45B	1852803	1842495	9606.ENSP00000344352	9606.ENSP00000215631	0	0	0	0	0.188	0	0	0.37	0.467
DCK	CREM	1847023	1845738	9606.ENSP00000286648	9606.ENSP00000265372	0	0	0	0	0	0	0	0.467	0.467
CXCL2	ATF3	1861702	1852803	9606.ENSP00000427279	9606.ENSP00000344352	0	0	0	0	0.247	0	0	0.322	0.467
HSPA1A	CREM	1856351	1845738	9606.ENSP00000364802	9606.ENSP00000265372	0	0	0	0	0.049	0.11	0	0.421	0.467
JUN	DCK	1855436	1847023	9606.ENSP00000360266	9606.ENSP00000286648	0	0	0	0	0	0	0	0.465	0.465
CYSLTR1	FOS	1855879	1848822	9606.ENSP00000362401	9606.ENSP00000306245	0	0	0	0	0	0	0	0.465	0.465
IFI16	RB1	1854740	1845924	9606.ENSP00000357113	9606.ENSP00000267163	0	0	0	0	0.069	0.396	0	0.124	0.465
DPYD	MKKS	1855189	1843796	9606.ENSP00000359211	9606.ENSP00000246062	0.063	0	0	0	0.056	0	0	0.444	0.465
PDE4B	LRRK2	1851429	1848005	9606.ENSP00000332116	9606.ENSP00000298910	0	0	0	0	0.093	0.114	0	0.387	0.464
PTPN6	CLEC12A	1859578	1853232	9606.ENSP00000391592	9606.ENSP00000347916	0	0	0	0	0	0	0	0.464	0.463
NR4A2	ATF3	1852822	1852803	9606.ENSP00000344479	9606.ENSP00000344352	0	0	0	0	0.258	0	0	0.305	0.462
HSPA1B	LRRK2	1856350	1848005	9606.ENSP00000364801	9606.ENSP00000298910	0	0	0	0	0.052	0.17	0	0.372	0.462
GIMAP8	FGL2	1848703	1843920	9606.ENSP00000305107	9606.ENSP00000248598	0	0	0	0	0.462	0	0	0	0.461
TUBB2A	OAS2	1857206	1852576	9606.ENSP00000369703	9606.ENSP00000342278	0	0	0	0	0	0.104	0	0.422	0.46
DUSP2	PLK2	1847145	1846372	9606.ENSP00000288943	9606.ENSP00000274289	0	0	0	0	0.121	0.292	0	0.202	0.46
MSH2	ASF1A	1843341	1843214	9606.ENSP00000233146	9606.ENSP00000229595	0	0	0	0	0.403	0.095	0	0.081	0.46
RACGAP1	PLK2	1849236	1846372	9606.ENSP00000309871	9606.ENSP00000274289	0	0	0	0	0.42	0	0	0.107	0.459
IGSF6	GIMAP4	1846016	1844396	9606.ENSP00000268389	9606.ENSP00000255945	0	0	0	0	0.459	0	0	0	0.459
ACTL6A	CETN3	1860014	1846832	9606.ENSP00000397552	9606.ENSP00000283122	0	0	0	0	0.162	0.292	0	0.161	0.459
RACGAP1	DBF4	1849236	1845796	9606.ENSP00000309871	9606.ENSP00000265728	0	0	0	0	0.459	0	0	0	0.459
DPYD	NAMPT	1855189	1842925	9606.ENSP00000359211	9606.ENSP00000222553	0.085	0	0	0	0.219	0.073	0	0.278	0.459
PLK3	DBF4	1855637	1845796	9606.ENSP00000361275	9606.ENSP00000265728	0	0	0	0	0.071	0.184	0	0.342	0.458
VEGFA	XAF1	1855611	1854224	9606.ENSP00000361125	9606.ENSP00000354822	0	0	0	0	0	0	0	0.458	0.458
JUN	EGR3	1855436	1850005	9606.ENSP00000360266	9606.ENSP00000318057	0	0	0	0	0.08	0.118	0	0.385	0.457
NLRC4	IGSF6	1854083	1846016	9606.ENSP00000354159	9606.ENSP00000268389	0	0	0	0	0.458	0	0	0	0.457
NR4A2	THBS1	1852822	1844779	9606.ENSP00000344479	9606.ENSP00000260356	0	0	0	0	0	0	0	0.457	0.457
CSF1R	TP53	1847002	1846083	9606.ENSP00000286301	9606.ENSP00000269305	0	0	0	0	0	0.063	0	0.444	0.456
TLR7	NFKBIA	1857265	1842621	9606.ENSP00000370034	9606.ENSP00000216797	0	0	0	0	0	0.12	0	0.406	0.455
RIPK2	NFKBIA	1842798	1842621	9606.ENSP00000220751	9606.ENSP00000216797	0.048	0	0	0	0.099	0.17	0	0.324	0.455
IRS2	JUN	1856394	1855436	9606.ENSP00000365016	9606.ENSP00000360266	0	0	0	0	0.052	0	0	0.448	0.454
ZC3H12A	VEGFA	1855826	1855611	9606.ENSP00000362174	9606.ENSP00000361125	0	0	0	0	0	0	0	0.454	0.454
JUN	SIK1	1855436	1846133	9606.ENSP00000360266	9606.ENSP00000270162	0	0	0	0	0.142	0.111	0	0.341	0.454
MAFF	FOS	1852928	1848822	9606.ENSP00000345393	9606.ENSP00000306245	0	0	0	0	0.057	0.191	0	0.342	0.454
OAS1	TUBB2A	1859322	1857206	9606.ENSP00000388001	9606.ENSP00000369703	0	0	0	0	0	0.104	0	0.416	0.454
PLK2	DUSP4	1846372	1843550	9606.ENSP00000274289	9606.ENSP00000240100	0	0	0	0	0.121	0.292	0	0.192	0.453
HCK	CYP1B1	1856392	1844805	9606.ENSP00000365012	9606.ENSP00000260630	0.052	0	0	0	0.053	0	0	0.44	0.453
VPS35	RAB10	1848019	1845602	9606.ENSP00000299138	9606.ENSP00000264710	0	0	0	0	0.091	0	0	0.422	0.453
IRS2	ATF3	1856394	1852803	9606.ENSP00000365016	9606.ENSP00000344352	0	0	0	0	0	0	0	0.452	0.452
JAG1	RIPK2	1844342	1842798	9606.ENSP00000254958	9606.ENSP00000220751	0	0	0	0	0.046	0.054	0	0.442	0.452
NLRC4	TLR8	1854083	1842687	9606.ENSP00000354159	9606.ENSP00000218032	0	0	0	0	0.247	0	0	0.303	0.452
OAS2	ATG4C	1852576	1850418	9606.ENSP00000342278	9606.ENSP00000322159	0	0	0	0	0.052	0	0	0.444	0.45
OAS1	ATG4C	1859322	1850418	9606.ENSP00000388001	9606.ENSP00000322159	0	0	0	0	0.052	0	0	0.444	0.45
JUN	TAF4	1855436	1844180	9606.ENSP00000360266	9606.ENSP00000252996	0	0	0	0	0	0.325	0	0.218	0.45
DUSP7	PLK3	1861273	1855637	9606.ENSP00000417183	9606.ENSP00000361275	0	0	0	0	0.181	0.292	0	0.128	0.45
BANF1	TP53	1849280	1846083	9606.ENSP00000310275	9606.ENSP00000269305	0	0	0	0	0.157	0	0	0.375	0.45
PIGA	UGDH	1857225	1850153	9606.ENSP00000369820	9606.ENSP00000319501	0.309	0	0	0	0.12	0	0	0.167	0.449
ACADM	AHSA1	1860801	1842603	9606.ENSP00000409612	9606.ENSP00000216479	0	0	0	0	0.071	0.431	0	0	0.449
FOS	SAMHD1	1848822	1845231	9606.ENSP00000306245	9606.ENSP00000262878	0	0	0	0	0.054	0	0	0.442	0.449
MAFF	PPP1R15A	1852928	1842391	9606.ENSP00000345393	9606.ENSP00000200453	0	0	0	0	0.377	0	0	0.152	0.449
HSPA1B	PPIF	1856350	1843008	9606.ENSP00000364801	9606.ENSP00000225174	0	0	0	0	0.073	0.111	0	0.385	0.448
HSD17B4	HDHD1	1861507	1859935	9606.ENSP00000420914	9606.ENSP00000396452	0	0	0	0	0	0	0.435	0.064	0.448
CXCL2	IFRD1	1861702	1842134	9606.ENSP00000427279	9606.ENSP00000005558	0	0	0	0	0	0	0	0.448	0.448
RANBP2	TLR8	1846837	1842687	9606.ENSP00000283195	9606.ENSP00000218032	0	0	0	0	0.121	0.338	0	0.128	0.448
OAS1	IFI16	1859322	1854740	9606.ENSP00000388001	9606.ENSP00000357113	0	0	0	0	0.146	0	0	0.38	0.448
PLK3	DUSP10	1855637	1854467	9606.ENSP00000361275	9606.ENSP00000355866	0	0	0	0	0.146	0.292	0	0.159	0.448
ICAM2	IL8	1859365	1848852	9606.ENSP00000388666	9606.ENSP00000306512	0	0	0	0	0.055	0	0	0.44	0.448
DUSP7	PLK2	1861273	1846372	9606.ENSP00000417183	9606.ENSP00000274289	0	0	0	0	0.181	0.292	0	0.124	0.447
TLR7	TNFSF10	1857265	1843591	9606.ENSP00000370034	9606.ENSP00000241261	0	0	0	0	0.053	0	0	0.441	0.447
ATF3	ZFP36	1852803	1843925	9606.ENSP00000344352	9606.ENSP00000248673	0	0	0	0	0.339	0	0	0.199	0.447
JUN	MKKS	1855436	1843796	9606.ENSP00000360266	9606.ENSP00000246062	0	0	0	0	0	0	0	0.447	0.447
VEGFA	SMAD7	1855611	1845078	9606.ENSP00000361125	9606.ENSP00000262158	0	0	0	0	0.054	0	0	0.44	0.447
PTGS2	CCL3	1854602	1843010	9606.ENSP00000356438	9606.ENSP00000225245	0	0	0	0	0.098	0	0	0.411	0.446
TLR5	IFNG	1852287	1843180	9606.ENSP00000340089	9606.ENSP00000229135	0	0	0	0	0	0	0	0.446	0.446
HDHD1	DPYD	1859935	1855189	9606.ENSP00000396452	9606.ENSP00000359211	0.074	0	0	0	0.067	0	0.411	0	0.446
TLR7	CSF1R	1857265	1847002	9606.ENSP00000370034	9606.ENSP00000286301	0.05	0	0	0	0.107	0.173	0	0.302	0.446
BCL2A1	IL1B	1845978	1845335	9606.ENSP00000267953	9606.ENSP00000263341	0	0	0	0	0.235	0	0	0.304	0.445
TRIM5	DDX58	1857137	1857110	9606.ENSP00000369373	9606.ENSP00000369213	0	0	0	0	0.128	0	0	0.389	0.445
OAS1	TLR8	1859322	1842687	9606.ENSP00000388001	9606.ENSP00000218032	0	0	0	0	0.05	0.097	0	0.404	0.444
IL1B	TLR8	1845335	1842687	9606.ENSP00000263341	9606.ENSP00000218032	0	0	0	0	0.046	0	0	0.442	0.444
PFKFB3	PRKACB	1857093	1855328	9606.ENSP00000369100	9606.ENSP00000359719	0	0	0	0	0.106	0.381	0	0.076	0.444
CREM	FOSB	1845738	1843783	9606.ENSP00000265372	9606.ENSP00000245919	0	0	0	0	0.051	0.074	0	0.418	0.444
PLAUR	HBEGF	1852201	1843270	9606.ENSP00000339328	9606.ENSP00000230990	0	0	0	0	0.234	0	0	0.304	0.444
NDUFA8	PDHB	1855985	1848936	9606.ENSP00000362873	9606.ENSP00000307241	0	0	0	0	0.443	0	0	0	0.443
LRRK2	MAP3K8	1848005	1845272	9606.ENSP00000298910	9606.ENSP00000263056	0	0	0	0.619	0.097	0.343	0	0.295	0.443
TLR5	GADD45B	1852287	1842495	9606.ENSP00000340089	9606.ENSP00000215631	0	0	0	0	0	0	0	0.443	0.443
CD83	TLR8	1856986	1842687	9606.ENSP00000368450	9606.ENSP00000218032	0	0	0	0	0.053	0	0	0.436	0.443
PTGS2	TNFSF10	1854602	1843591	9606.ENSP00000356438	9606.ENSP00000241261	0	0	0	0	0	0	0	0.443	0.443
RIT1	EREG	1854779	1843742	9606.ENSP00000357306	9606.ENSP00000244869	0	0	0	0	0	0	0	0.442	0.442
VEGFA	NFKBIA	1855611	1842621	9606.ENSP00000361125	9606.ENSP00000216797	0	0	0	0	0	0	0	0.442	0.442
RB1	SKIL	1845924	1844666	9606.ENSP00000267163	9606.ENSP00000259119	0	0	0	0	0	0.36	0	0.164	0.442
VEGFA	SAMHD1	1855611	1845231	9606.ENSP00000361125	9606.ENSP00000262878	0	0	0	0	0	0	0	0.442	0.442
CCL20	TLR5	1853751	1852287	9606.ENSP00000351671	9606.ENSP00000340089	0	0	0	0	0	0	0	0.441	0.441
GIMAP8	IGSF6	1848703	1846016	9606.ENSP00000305107	9606.ENSP00000268389	0	0	0	0	0.441	0	0	0	0.441
CX3CR1	IL1B	1853665	1845335	9606.ENSP00000351059	9606.ENSP00000263341	0	0	0	0	0	0	0	0.441	0.441
DDX58	NLRC4	1857110	1854083	9606.ENSP00000369213	9606.ENSP00000354159	0	0	0	0	0	0	0	0.441	0.441
PTGS2	RB1	1854602	1845924	9606.ENSP00000356438	9606.ENSP00000267163	0	0	0	0	0	0	0	0.441	0.441
RB1	TNFSF10	1845924	1843591	9606.ENSP00000267163	9606.ENSP00000241261	0	0	0	0	0	0	0	0.441	0.441
DDX58	IFNG	1857110	1843180	9606.ENSP00000369213	9606.ENSP00000229135	0	0	0	0	0	0	0	0.441	0.441
TP53	HBEGF	1846083	1843270	9606.ENSP00000269305	9606.ENSP00000230990	0	0	0	0	0	0	0	0.441	0.441
TNFSF10	NFKBIA	1843591	1842621	9606.ENSP00000241261	9606.ENSP00000216797	0	0	0	0	0	0	0	0.441	0.441
DUSP10	PLK2	1854467	1846372	9606.ENSP00000355866	9606.ENSP00000274289	0	0	0	0	0.121	0.292	0	0.173	0.44
IL1B	GADD45B	1845335	1842495	9606.ENSP00000263341	9606.ENSP00000215631	0	0	0	0	0.056	0	0	0.432	0.44
IL1B	RIPK2	1845335	1842798	9606.ENSP00000263341	9606.ENSP00000220751	0	0	0	0	0.1	0.098	0	0.365	0.44
HIF1A	THBS1	1852062	1844779	9606.ENSP00000338018	9606.ENSP00000260356	0	0	0	0	0	0	0	0.439	0.439
MARCH1	FGL2	1846358	1843920	9606.ENSP00000274056	9606.ENSP00000248598	0	0	0	0	0.439	0	0	0	0.439
JUN	OSM	1855436	1842507	9606.ENSP00000360266	9606.ENSP00000215781	0	0	0	0	0	0	0	0.439	0.439
CRYZ	TP53	1852214	1846083	9606.ENSP00000339399	9606.ENSP00000269305	0	0	0	0	0	0	0	0.439	0.439
TRIM34	TRIM5	1860356	1857137	9606.ENSP00000402595	9606.ENSP00000369373	0	0	0	0.951	0.128	0.36	0	0.759	0.439
OAS1	TLR7	1859322	1857265	9606.ENSP00000388001	9606.ENSP00000370034	0	0	0	0	0.053	0.097	0	0.397	0.439
IL8	AREG	1848852	1845557	9606.ENSP00000306512	9606.ENSP00000264487	0	0	0	0	0.088	0	0	0.41	0.439
ZC3H12A	FOS	1855826	1848822	9606.ENSP00000362174	9606.ENSP00000306245	0	0	0	0	0.046	0	0	0.436	0.439
IL8	GADD45B	1848852	1842495	9606.ENSP00000306512	9606.ENSP00000215631	0	0	0	0	0	0	0	0.438	0.438
MAP3K8	TNFAIP3	1845272	1843455	9606.ENSP00000263056	9606.ENSP00000237289	0	0	0	0	0.317	0	0	0.211	0.438
ACADM	DPYD	1860801	1855189	9606.ENSP00000409612	9606.ENSP00000359211	0.062	0	0	0	0.059	0	0	0.415	0.438
CXCL2	IFNG	1861702	1843180	9606.ENSP00000427279	9606.ENSP00000229135	0	0	0	0	0	0	0	0.438	0.438
FUNDC1	GABARAPL1	1856802	1845870	9606.ENSP00000367284	9606.ENSP00000266458	0	0	0	0	0.054	0.244	0	0.277	0.438
ZNF559	LRRK2	1858136	1848005	9606.ENSP00000377461	9606.ENSP00000298910	0	0	0	0	0.088	0.178	0	0.309	0.437
IL1B	HBEGF	1845335	1843270	9606.ENSP00000263341	9606.ENSP00000230990	0	0	0	0	0.15	0	0	0.364	0.436
ARFIP1	TXNDC9	1847754	1845514	9606.ENSP00000296557	9606.ENSP00000264255	0	0	0	0	0.073	0.417	0	0	0.436
P2RY13	DUSP2	1850239	1847145	9606.ENSP00000320376	9606.ENSP00000288943	0	0	0	0	0	0	0	0.436	0.436
HCK	TLR8	1856392	1842687	9606.ENSP00000365012	9606.ENSP00000218032	0.05	0	0	0	0.237	0.173	0	0.17	0.436
SLC2A14	PFKFB3	1858405	1857093	9606.ENSP00000379834	9606.ENSP00000369100	0.048	0	0	0	0.103	0	0	0.391	0.435
JUN	NR4A2	1855436	1852822	9606.ENSP00000360266	9606.ENSP00000344479	0	0	0	0	0.176	0	0	0.342	0.435
HCK	FGL2	1856392	1843920	9606.ENSP00000365012	9606.ENSP00000248598	0	0	0	0	0.373	0.119	0	0.059	0.434
TLR7	CCR2	1857265	1847341	9606.ENSP00000370034	9606.ENSP00000292301	0	0	0	0	0.12	0	0	0.382	0.434
BRI3BP	BLNK	1852366	1842996	9606.ENSP00000340761	9606.ENSP00000224337	0	0	0	0	0	0	0	0.434	0.434
GIMAP1	FGL2	1848457	1843920	9606.ENSP00000302833	9606.ENSP00000248598	0	0	0	0	0.434	0	0	0	0.434
SAMD9	EEA1	1857120	1849997	9606.ENSP00000369292	9606.ENSP00000317955	0	0	0	0	0.082	0.408	0	0	0.434
PLK3	HIF1A	1855637	1852062	9606.ENSP00000361275	9606.ENSP00000338018	0	0	0	0	0	0	0	0.434	0.434
PARP1	NFKBIA	1854450	1842621	9606.ENSP00000355759	9606.ENSP00000216797	0	0	0	0	0.055	0	0	0.425	0.433
IL8	RIPK2	1848852	1842798	9606.ENSP00000306512	9606.ENSP00000220751	0	0	0	0	0.124	0	0	0.38	0.433
OAS2	TNFSF10	1852576	1843591	9606.ENSP00000342278	9606.ENSP00000241261	0	0	0	0	0.305	0	0	0.215	0.432
IL8	MAP3K8	1848852	1845272	9606.ENSP00000306512	9606.ENSP00000263056	0	0	0	0	0.129	0	0	0.375	0.432
JUN	DUSP6	1855436	1846636	9606.ENSP00000360266	9606.ENSP00000279488	0	0	0	0	0.055	0.069	0	0.406	0.432
PTGS2	OSM	1854602	1842507	9606.ENSP00000356438	9606.ENSP00000215781	0	0	0	0	0.14	0	0	0.366	0.432
ACADM	CRYZ	1860801	1852214	9606.ENSP00000409612	9606.ENSP00000339399	0	0	0	0	0.334	0	0	0.181	0.431
P2RY13	IGSF6	1850239	1846016	9606.ENSP00000320376	9606.ENSP00000268389	0	0	0	0	0.431	0	0	0	0.431
TLR5	RANBP2	1852287	1846837	9606.ENSP00000340089	9606.ENSP00000283195	0	0	0	0	0.092	0.338	0	0.128	0.43
TLR7	RANBP2	1857265	1846837	9606.ENSP00000370034	9606.ENSP00000283195	0	0	0	0	0.092	0.338	0	0.128	0.43
TNFAIP8L2	CSF1R	1854917	1847002	9606.ENSP00000357906	9606.ENSP00000286301	0	0	0	0	0.43	0	0	0	0.43
GIMAP1	IGSF6	1848457	1846016	9606.ENSP00000302833	9606.ENSP00000268389	0	0	0	0	0.429	0	0	0	0.429
GBP1	IL1B	1855263	1845335	9606.ENSP00000359504	9606.ENSP00000263341	0	0	0	0	0.06	0	0	0.417	0.428
HSPA1B	CREM	1856350	1845738	9606.ENSP00000364801	9606.ENSP00000265372	0	0	0	0	0.049	0.11	0	0.379	0.428
ATF3	CDKN1A	1852803	1843736	9606.ENSP00000344352	9606.ENSP00000244741	0	0	0	0	0.167	0	0	0.341	0.428
HSPA1B	OAS2	1856350	1852576	9606.ENSP00000364801	9606.ENSP00000342278	0	0	0	0	0.065	0.104	0	0.37	0.426
OAS1	HSPA1A	1859322	1856351	9606.ENSP00000388001	9606.ENSP00000364802	0	0	0	0	0.065	0.104	0	0.37	0.426
OAS1	HSPA1B	1859322	1856350	9606.ENSP00000388001	9606.ENSP00000364801	0	0	0	0	0.065	0.104	0	0.37	0.426
CD83	TNFAIP3	1856986	1843455	9606.ENSP00000368450	9606.ENSP00000237289	0	0	0	0	0.321	0	0	0.189	0.426
TNFAIP8L2	FGL2	1854917	1843920	9606.ENSP00000357906	9606.ENSP00000248598	0	0	0	0	0.427	0	0	0	0.426
HSPA1A	OAS2	1856351	1852576	9606.ENSP00000364802	9606.ENSP00000342278	0	0	0	0	0.065	0.104	0	0.37	0.426
JUN	DUSP10	1855436	1854467	9606.ENSP00000360266	9606.ENSP00000355866	0	0	0	0	0.107	0.1	0	0.342	0.426
LRRK2	PPIF	1848005	1843008	9606.ENSP00000298910	9606.ENSP00000225174	0	0	0	0	0.054	0.179	0	0.32	0.426
HSPA1A	ATF3	1856351	1852803	9606.ENSP00000364802	9606.ENSP00000344352	0	0	0	0	0.245	0.058	0	0.258	0.426
PFKFB3	IL1B	1857093	1845335	9606.ENSP00000369100	9606.ENSP00000263341	0	0	0	0	0.087	0	0	0.396	0.425
P2RY14	GIMAP4	1849063	1844396	9606.ENSP00000308361	9606.ENSP00000255945	0	0	0	0	0.424	0	0	0	0.424
HIF1A	FOSL2	1852062	1845606	9606.ENSP00000338018	9606.ENSP00000264716	0	0	0	0	0	0	0	0.424	0.424
RGS1	TNFRSF17	1854596	1842219	9606.ENSP00000356429	9606.ENSP00000053243	0	0	0	0	0	0	0	0.424	0.424
SAMD9L	EEA1	1850811	1849997	9606.ENSP00000326247	9606.ENSP00000317955	0	0	0	0	0.065	0.408	0	0	0.423
JUN	MAFF	1855436	1852928	9606.ENSP00000360266	9606.ENSP00000345393	0	0	0	0	0.114	0.099	0	0.335	0.423
HCK	HSPA1A	1856392	1856351	9606.ENSP00000365012	9606.ENSP00000364802	0	0	0	0	0	0.169	0	0.334	0.423
DDX60	TNFSF10	1858119	1843591	9606.ENSP00000377344	9606.ENSP00000241261	0	0	0	0	0.392	0	0	0.09	0.423
IFNG	TLR8	1843180	1842687	9606.ENSP00000229135	9606.ENSP00000218032	0	0	0	0	0.068	0	0	0.406	0.423
CREM	FOSL2	1845738	1845606	9606.ENSP00000265372	9606.ENSP00000264716	0	0	0	0	0.052	0.074	0	0.394	0.422
FOS	GADD45B	1848822	1842495	9606.ENSP00000306245	9606.ENSP00000215631	0	0	0	0	0.157	0	0	0.342	0.422
PTGS2	THBS1	1854602	1844779	9606.ENSP00000356438	9606.ENSP00000260356	0	0	0	0	0.054	0	0	0.415	0.422
NR4A3	TNFSF10	1851549	1843591	9606.ENSP00000333122	9606.ENSP00000241261	0	0	0	0	0	0	0	0.423	0.422
TIPARP	CSRNP1	1847644	1846301	9606.ENSP00000295924	9606.ENSP00000273153	0	0	0	0	0.057	0	0	0.411	0.421
CXCL2	FOS	1861702	1848822	9606.ENSP00000427279	9606.ENSP00000306245	0	0	0	0	0.245	0	0	0.264	0.421
TLR5	TLR8	1852287	1842687	9606.ENSP00000340089	9606.ENSP00000218032	0	0	0	0.64	0.146	0	0	0.893	0.419
MAP3K8	NFKBIA	1845272	1842621	9606.ENSP00000263056	9606.ENSP00000216797	0	0	0	0	0.188	0.099	0	0.27	0.419
DUSP6	JAG1	1846636	1844342	9606.ENSP00000279488	9606.ENSP00000254958	0	0	0	0	0.054	0	0	0.411	0.418
JUN	DUSP4	1855436	1843550	9606.ENSP00000360266	9606.ENSP00000240100	0	0	0	0	0.086	0.069	0	0.37	0.417
PLK3	DUSP4	1855637	1843550	9606.ENSP00000361275	9606.ENSP00000240100	0	0	0	0	0.121	0.292	0	0.138	0.417
ATF3	EGR3	1852803	1850005	9606.ENSP00000344352	9606.ENSP00000318057	0	0	0	0	0.159	0.066	0	0.318	0.417
MNDA	TLR8	1854743	1842687	9606.ENSP00000357123	9606.ENSP00000218032	0	0	0	0	0.372	0	0	0.111	0.417
IL8	CDKN1A	1848852	1843736	9606.ENSP00000306512	9606.ENSP00000244741	0	0	0	0	0.054	0	0	0.409	0.417
VPS35	ACSL1	1848019	1846727	9606.ENSP00000299138	9606.ENSP00000281455	0	0	0	0	0.055	0	0	0.408	0.417
JUN	PMAIP1	1855436	1850799	9606.ENSP00000360266	9606.ENSP00000326119	0	0	0	0	0	0	0	0.416	0.416
MNDA	RB1	1854743	1845924	9606.ENSP00000357123	9606.ENSP00000267163	0	0	0	0	0	0.363	0	0.12	0.416
IFI16	SAMD9L	1854740	1850811	9606.ENSP00000357113	9606.ENSP00000326247	0	0	0	0	0.408	0	0	0.055	0.416
MEF2C	TNFRSF17	1852378	1842219	9606.ENSP00000340874	9606.ENSP00000053243	0	0	0	0	0	0	0	0.417	0.416
HIF1A	RACGAP1	1852062	1849236	9606.ENSP00000338018	9606.ENSP00000309871	0	0	0	0	0	0	0	0.416	0.416
TLR7	OAS2	1857265	1852576	9606.ENSP00000370034	9606.ENSP00000342278	0	0	0	0	0.131	0.097	0	0.314	0.415
LRRK2	ZNF331	1848005	1844203	9606.ENSP00000298910	9606.ENSP00000253144	0	0	0	0	0.053	0.178	0	0.309	0.415
ZNF146	LRRK2	1859619	1848005	9606.ENSP00000392095	9606.ENSP00000298910	0	0	0	0	0.053	0.178	0	0.309	0.415
GZF1	LRRK2	1852094	1848005	9606.ENSP00000338290	9606.ENSP00000298910	0	0	0	0	0.053	0.178	0	0.309	0.415
ZBTB43	LRRK2	1855909	1848005	9606.ENSP00000362556	9606.ENSP00000298910	0	0	0	0	0.053	0.178	0	0.309	0.415
ZBTB10	LRRK2	1859276	1848005	9606.ENSP00000387462	9606.ENSP00000298910	0	0	0	0	0.053	0.178	0	0.309	0.415
ZNF260	LRRK2	1861805	1848005	9606.ENSP00000429803	9606.ENSP00000298910	0	0	0	0	0.053	0.178	0	0.309	0.415
EGR3	LRRK2	1850005	1848005	9606.ENSP00000318057	9606.ENSP00000298910	0	0	0	0	0.053	0.178	0	0.309	0.415
ZNF295	LRRK2	1849108	1848005	9606.ENSP00000308759	9606.ENSP00000298910	0	0	0	0	0.053	0.178	0	0.309	0.415
TLR5	CSF1R	1852287	1847002	9606.ENSP00000340089	9606.ENSP00000286301	0.05	0	0	0	0.159	0.173	0	0.218	0.414
IL8	CSF1R	1848852	1847002	9606.ENSP00000306512	9606.ENSP00000286301	0	0	0	0	0	0	0	0.415	0.414
MNDA	NLRC4	1854743	1854083	9606.ENSP00000357123	9606.ENSP00000354159	0	0	0	0	0.251	0	0	0.25	0.414
GIMAP5	CSF1R	1853717	1847002	9606.ENSP00000351473	9606.ENSP00000286301	0	0	0	0	0.412	0	0	0	0.412
RIT1	PRKAR1A	1854779	1853711	9606.ENSP00000357306	9606.ENSP00000351410	0	0	0	0	0.085	0.132	0	0.319	0.412
DDX58	TDRD7	1857110	1853172	9606.ENSP00000369213	9606.ENSP00000347444	0	0	0	0	0.413	0	0	0	0.412
GIMAP5	IGSF6	1853717	1846016	9606.ENSP00000351473	9606.ENSP00000268389	0	0	0	0	0.412	0	0	0	0.412
PARP1	BANF1	1854450	1849280	9606.ENSP00000355759	9606.ENSP00000310275	0	0	0	0	0.055	0.164	0	0.315	0.412
NR4A2	NR4A3	1852822	1851549	9606.ENSP00000344479	9606.ENSP00000333122	0	0	0	0.95	0.39	0	0	0.711	0.411
EEA1	TP53	1849997	1846083	9606.ENSP00000317955	9606.ENSP00000269305	0	0	0	0	0	0.285	0	0.211	0.411
CD1D	CCR2	1854753	1847341	9606.ENSP00000357153	9606.ENSP00000292301	0	0	0	0	0.167	0	0	0.323	0.411
DCP1B	ZFP36	1846681	1843925	9606.ENSP00000280665	9606.ENSP00000248673	0	0	0	0	0	0.325	0	0.162	0.411
MARCH1	IGSF6	1846358	1846016	9606.ENSP00000274056	9606.ENSP00000268389	0	0	0	0	0.411	0	0	0	0.411
DDIT3	TNFSF10	1862449	1843591	9606.ENSP00000447803	9606.ENSP00000241261	0	0	0	0	0	0	0	0.41	0.41
CCL3L3	CX3CR1	1856854	1853665	9606.ENSP00000367605	9606.ENSP00000351059	0	0	0	0	0	0	0	0.41	0.41
PARP1	FOS	1854450	1848822	9606.ENSP00000355759	9606.ENSP00000306245	0	0	0	0	0	0	0	0.41	0.41
GIMAP7	FGL2	1849788	1843920	9606.ENSP00000315474	9606.ENSP00000248598	0	0	0	0	0.41	0	0	0	0.41
VEGFA	SLC2A3	1855611	1842244	9606.ENSP00000361125	9606.ENSP00000075120	0	0	0	0	0	0	0	0.41	0.41
RIT1	DUSP4	1854779	1843550	9606.ENSP00000357306	9606.ENSP00000240100	0	0	0	0	0.043	0.164	0	0.322	0.41
RACGAP1	TP53	1849236	1846083	9606.ENSP00000309871	9606.ENSP00000269305	0	0	0	0	0.078	0	0	0.385	0.409
DDX58	GADD45B	1857110	1842495	9606.ENSP00000369213	9606.ENSP00000215631	0	0	0	0	0	0	0	0.408	0.408
MSRB1	EREG	1854294	1843742	9606.ENSP00000355084	9606.ENSP00000244869	0	0	0	0	0	0	0	0.409	0.408
HCK	JUN	1856392	1855436	9606.ENSP00000365012	9606.ENSP00000360266	0	0	0	0	0.048	0.109	0	0.358	0.408
CXCL3	TNFAIP3	1847662	1843455	9606.ENSP00000296026	9606.ENSP00000237289	0	0	0	0	0.163	0	0	0.322	0.408
IL8	ADM	1848852	1846549	9606.ENSP00000306512	9606.ENSP00000278175	0	0	0	0	0	0	0	0.408	0.408
TLR8	GADD45B	1842687	1842495	9606.ENSP00000218032	9606.ENSP00000215631	0	0	0	0	0	0	0	0.409	0.408
IL8	SAMHD1	1848852	1845231	9606.ENSP00000306512	9606.ENSP00000262878	0	0	0	0	0	0	0	0.408	0.408
IL8	RB1	1848852	1845924	9606.ENSP00000306512	9606.ENSP00000267163	0	0	0	0	0	0	0	0.409	0.408
VEGFA	CX3CR1	1855611	1853665	9606.ENSP00000361125	9606.ENSP00000351059	0	0	0	0	0	0	0	0.409	0.408
DDX58	MSH2	1857110	1843341	9606.ENSP00000369213	9606.ENSP00000233146	0	0	0	0	0.129	0.146	0	0.269	0.408
PARP1	IL8	1854450	1848852	9606.ENSP00000355759	9606.ENSP00000306512	0	0	0	0	0	0	0	0.408	0.408
PFKFB3	DPYD	1857093	1855189	9606.ENSP00000369100	9606.ENSP00000359211	0.162	0	0	0	0.085	0	0	0.291	0.408
IL1B	MAP3K8	1845335	1845272	9606.ENSP00000263341	9606.ENSP00000263056	0	0	0	0	0.124	0	0	0.352	0.408
DCK	RB1	1847023	1845924	9606.ENSP00000286648	9606.ENSP00000267163	0	0	0	0	0.131	0	0	0.346	0.408
CXCL2	VEGFA	1861702	1855611	9606.ENSP00000427279	9606.ENSP00000361125	0	0	0	0	0	0	0	0.409	0.408
TP53	GADD45B	1846083	1842495	9606.ENSP00000269305	9606.ENSP00000215631	0	0	0	0	0	0	0	0.407	0.407
BCL2A1	NFKBIA	1845978	1842621	9606.ENSP00000267953	9606.ENSP00000216797	0	0	0	0	0.065	0.116	0	0.341	0.407
TRIM5	SAMHD1	1857137	1845231	9606.ENSP00000369373	9606.ENSP00000262878	0	0	0	0	0.053	0	0	0.4	0.407
CX3CR1	IFNG	1853665	1843180	9606.ENSP00000351059	9606.ENSP00000229135	0	0	0	0	0	0	0	0.407	0.407
LRRK2	ZFP36	1848005	1843925	9606.ENSP00000298910	9606.ENSP00000248673	0	0	0	0	0.055	0.177	0	0.299	0.407
CD83	CCR2	1856986	1847341	9606.ENSP00000368450	9606.ENSP00000292301	0	0	0	0	0.055	0	0	0.396	0.405
TLR8	NFKBIA	1842687	1842621	9606.ENSP00000218032	9606.ENSP00000216797	0	0	0	0	0	0.12	0	0.351	0.404
GIMAP8	CSF1R	1848703	1847002	9606.ENSP00000305107	9606.ENSP00000286301	0	0	0	0	0.404	0	0	0	0.404
DDIT3	GADD45B	1862449	1842495	9606.ENSP00000447803	9606.ENSP00000215631	0	0	0	0	0.053	0	0	0.396	0.403
SUCLA2	TXNDC9	1856910	1845514	9606.ENSP00000367923	9606.ENSP00000264255	0	0	0	0	0.244	0.171	0	0.123	0.403
CXCL2	JUN	1861702	1855436	9606.ENSP00000427279	9606.ENSP00000360266	0	0	0	0	0.133	0	0	0.339	0.403
GIMAP5	FGL2	1853717	1843920	9606.ENSP00000351473	9606.ENSP00000248598	0	0	0	0	0.403	0	0	0	0.403
ATF3	TNFAIP3	1852803	1843455	9606.ENSP00000344352	9606.ENSP00000237289	0	0	0	0	0.154	0	0	0.323	0.403
TLR7	JUN	1857265	1855436	9606.ENSP00000370034	9606.ENSP00000360266	0	0	0	0	0	0.069	0	0.384	0.402
MNDA	TP53	1854743	1846083	9606.ENSP00000357123	9606.ENSP00000269305	0	0	0	0	0	0.325	0	0.15	0.402
PTGS2	ATF3	1854602	1852803	9606.ENSP00000356438	9606.ENSP00000344352	0	0	0	0	0.118	0	0	0.348	0.401
CCL3	NFKBIA	1843010	1842621	9606.ENSP00000225245	9606.ENSP00000216797	0	0	0	0	0.125	0	0	0.344	0.401
THBD	IL1B	1856612	1845335	9606.ENSP00000366307	9606.ENSP00000263341	0	0	0	0	0	0	0	0.4	0.4
VEGFA	CCL20	1855611	1853751	9606.ENSP00000361125	9606.ENSP00000351671	0	0	0	0	0	0	0	0.4	0.4
NLRP3	IFNG	1851990	1843180	9606.ENSP00000337383	9606.ENSP00000229135	0	0	0	0	0	0	0	0.4	0.4
OMA1	TP53	1855439	1846083	9606.ENSP00000360270	9606.ENSP00000269305	0	0	0	0	0	0	0	0.4	0.4
SLC2A14	VEGFA	1858405	1855611	9606.ENSP00000379834	9606.ENSP00000361125	0	0	0	0	0	0	0	0.4	0.4

## Sheet: Sheet2
Attributes of network nodes
node_name	MCC	DMNC	MNC	Degree	EPC	BottleNeck	EcCentricity	Closeness	Radiality	Betweenness	Stress	ClusteringCoefficient
TP53	823658	0.20914	64	68	33.421	66	0.23312	136.5	6.65035	12120.5	65516	0.10799
LRRK2	237	0.18286	29	40	21.52	48	0.1865	116.4	6.36212	7844.68	43086	0.07179
JUN	1194788	0.27018	57	57	33.809	17	0.23312	128.583	6.5359	5877.92	44574	0.16353
CSF1R	903	0.30153	19	20	20.713	13	0.1865	106.517	6.26463	3696.02	31176	0.23684
IL1B	761408	0.34433	43	45	31.378	10	0.1865	118.267	6.34941	3568.04	26908	0.20808
IL8	1206323	0.37751	45	46	31.981	11	0.1865	120.85	6.41722	3259.12	26644	0.23575
IFNG	742192	0.4757	26	30	26.947	8	0.1865	110.6	6.28159	3053.71	20896	0.27816
FOS	1145651	0.31925	43	44	31.164	8	0.1865	120.283	6.4257	2713.07	22424	0.2019
RANBP2	71	0.27806	12	15	13.592	8	0.1865	99.6833	6.12476	2140.89	11454	0.18095
HSPA1A	285	0.32321	18	19	19.364	3	0.1865	107.6	6.30278	2113.9	18274	0.25731
VEGFA	1200606	0.3648	40	40	30.198	3	0.1865	116.683	6.35788	1881.45	16362	0.24744
CRYZ	28	0.2864	9	9	10.222	1	0.1865	92.5333	5.98065	1845.56	13452	0.33333
OAS1	10708	0.31531	24	24	17.546	6	0.15541	96.5667	5.9425	1777.25	21554	0.25362
DPYD	31	0.2927	7	17	9.471	6	0.1865	88.2167	5.77296	1504.64	10402	0.08824
OAS2	10576	0.32902	22	22	16.413	2	0.15541	95.0667	5.91707	1501.62	19178	0.27273
PTPN6	7	0	1	7	6.019	6	0.15541	79.55	5.57798	1441.71	8528	0
RACGAP1	18	0.38896	5	8	6.529	6	0.1865	87.0333	5.8111	1351.39	6882	0.32143
TNFSF10	772594	0.44614	27	27	26.334	4	0.1865	108.85	6.2604	1348.95	13662	0.34473
HCK	44	0.33919	10	12	14.463	5	0.1865	98.0667	6.12052	1335.57	8718	0.25758
RB1	403387	0.39303	20	23	21.823	5	0.1865	105.017	6.19258	1328.92	7560	0.25296
PARP1	444010	0.5923	16	18	21.27	4	0.1865	101.933	6.15019	1322.05	6366	0.43137
NFKBIA	774715	0.52252	24	25	27.254	4	0.1865	110.767	6.33669	1296.69	10568	0.38667
VPS35	5	0	1	5	3.171	7	0.1865	78.5333	5.56527	1272.05	6008	0
PDHB	9	0.37893	4	5	2.516	4	0.15541	69.3	5.19227	1229.79	8874	0.4
PTGS2	1188273	0.54504	24	25	26.52	5	0.1865	107.983	6.26463	1213.89	8472	0.40333
PPIF	26	0.56839	4	6	7.824	4	0.1865	90.7667	5.95946	1148.1	5684	0.4
HIF1A	46290	0.36558	22	22	22.157	3	0.1865	106.883	6.24768	1102.15	7664	0.30303
ACSL1	15	0.47366	4	7	2.908	3	0.15541	73.0167	5.33214	1039.94	4892	0.2381
ZFP36	5383	0.45045	14	15	20.582	4	0.1865	98.3833	6.0739	1038.4	8144	0.38095
HSD17B4	35	0.34989	8	9	5.665	8	0.1865	85.9333	5.7772	1025.41	6958	0.33333
DDX58	12422	0.47901	20	22	20.215	3	0.15541	96.6667	5.92555	966.09	10170	0.33766
CDKN1A	404722	0.58287	17	19	21.631	4	0.1865	102.433	6.15019	890.174	5148	0.4269
NDUFA8	4	0.30779	2	4	1.462	3	0.13321	54.6762	4.32336	882.377	6036	0.16667
TXNDC9	18	0.33284	6	8	6.319	4	0.1865	85.35	5.78567	817.988	3620	0.25
TUBB2A	11	0.25931	5	8	7.193	2	0.1865	85.5333	5.76872	711.622	4012	0.17857
UGDH	3	0	1	3	3.435	3	0.15541	75.55	5.44235	688.632	3816	0
TLR7	3708	0.49217	18	18	21.461	1	0.1865	101.633	6.14595	687.418	8278	0.43791
CXCL2	380307	0.62439	18	19	23.494	3	0.1865	98.95	6.0527	684.525	5232	0.49708
CYP1B1	6	0.30898	3	5	7.613	4	0.1865	88.2833	5.91283	674.393	3920	0.2
IGSF6	273	0.36587	12	13	8.872	5	0.15541	84.2333	5.67971	652.592	6060	0.32051
GBP1	10626	0.5408	15	15	16.395	3	0.1865	97.6	6.06542	644.593	5620	0.51429
TLR8	2428	0.44871	16	16	18.789	4	0.15541	96.6833	6.01456	607.75	5184	0.41667
RIPK2	149	0.41901	10	11	15.33	2	0.15541	92.5667	5.95098	596.652	4526	0.38182
FGL2	381	0.4242	11	12	7.541	2	0.15541	79.9833	5.52288	567.133	7264	0.37879
PRKACB	27	0.29157	8	11	10.011	1	0.15541	89.3833	5.84501	540.107	2960	0.2
C15orf48	3	0	1	3	1.498	2	0.13321	55.9095	4.44204	511.626	2368	0
CCL3	381612	0.60235	18	18	23.676	2	0.1865	98.6667	6.0527	493.048	5330	0.53595
RGS1	5	0.30779	2	5	5.164	2	0.15541	73.1167	5.3491	486.776	3840	0.2
HBEGF	11536	0.53647	13	13	19.457	2	0.1865	102.05	6.20105	486.524	4032	0.53846
CCR2	12257	0.50256	16	17	18.489	3	0.15541	93.55	5.90435	478.507	5284	0.41176
ADM	50	0.58344	5	7	12.314	3	0.1865	88.5333	5.86197	474.927	2994	0.47619
PLK3	88	0.32197	12	12	12.245	1	0.1865	96.7667	6.06542	472.001	3850	0.33333
HSPA1B	86	0.3791	10	10	11.65	9	0.1865	97.7667	6.11204	467.604	5276	0.42222
ATF3	3594	0.38738	24	24	24.573	2	0.1865	105.267	6.19258	461.295	4432	0.31159
BLNK	3	0	1	3	2.659	2	0.15541	69.6833	5.2728	449.722	1914	0
TRIM34	121	0.64826	5	6	6.098	2	0.15541	73.6167	5.36605	438	2404	0.66667
CCNL1	3	0.30779	2	3	3.179	2	0.15541	72.5167	5.36181	438	1940	0.33333
TIPARP	2	0	1	2	2.85	2	0.15541	68.75	5.23042	438	1788	0
NXT1	2	0	1	2	2.611	2	0.15541	67.9	5.20499	438	1618	0
GABARAPL1	25	0.56839	4	5	4.425	2	0.13321	67.0119	5.03544	438	6216	0.6
TNFAIP3	444	0.36053	15	15	19.725	3	0.1865	98.9333	6.09509	435.768	5466	0.34286
DYNC1I2	9	0.37893	4	5	2.788	1	0.15541	68.6667	5.17956	381.907	1836	0.4
SAMHD1	178	0.39027	11	11	15.407	2	0.1865	97.35	6.09085	348.587	5624	0.41818
MEF2C	10	0.37893	4	6	8.68	3	0.1865	85.4667	5.76024	323.828	2078	0.33333
IDH1	5	0.30779	2	5	5.408	2	0.1865	86.85	5.84925	306.082	2110	0.2
GIMAP4	481	0.64146	8	9	5.882	1	0.15541	76.6833	5.43387	302.564	4582	0.61111
IRF2	418	0.51877	10	10	12.588	1	0.1865	90.45	5.8874	299.27	2916	0.57778
DUSP4	121	0.55399	8	9	12.484	2	0.1865	94.6333	6.02303	281.396	2360	0.52778
MSH2	134	0.51223	7	9	12.711	5	0.1865	95.5167	6.05694	274.924	2554	0.38889
STX7	3	0	1	3	2.126	1	0.1865	66.2167	5.12021	262.051	1740	0
ACADM	35	0.34989	8	9	4.26	1	0.1865	74.55	5.34062	250.591	1462	0.33333
THBS1	751	0.58315	8	9	14.799	1	0.1865	95.7167	6.05694	244.036	2880	0.55556
PLK2	58	0.27934	10	10	9.506	2	0.1865	92.4333	5.96369	241.607	1972	0.31111
CX3CR1	5769	0.57863	10	11	16.069	2	0.15541	89.0333	5.81958	239.206	3654	0.52727
NLRC4	156	0.3791	10	10	12.472	1	0.1865	94.85	6.03575	237.438	2304	0.42222
GIMAP8	480	0.64146	8	8	5.146	2	0.15541	75.4333	5.40844	230.604	3826	0.78571
GIMAP5	480	0.64146	8	8	4.871	1	0.15541	75.4333	5.40844	230.604	3826	0.78571
XAF1	10242	0.5854	12	12	16.103	1	0.1865	93.8833	5.98065	218.183	3236	0.60606
CREM	284	0.31933	13	13	13.475	1	0.1865	90.9667	5.89588	218.169	1818	0.32051
NLRP3	1645	0.63848	10	11	13.765	2	0.15541	90.1333	5.86621	215.052	1522	0.58182
MNDA	22	0.32929	7	7	10.393	3	0.1865	90.0167	5.92979	206.946	2194	0.42857
CD83	1585	0.64439	9	10	15.186	2	0.15541	86.2833	5.73905	206.786	1268	0.6
EREG	6	0.30898	3	5	6.182	2	0.15541	76.9333	5.5356	192.985	1712	0.3
ACTL6A	30	0.32929	7	7	11.514	2	0.1865	93.05	5.9976	189.28	1366	0.42857
DCK	13	0.32413	5	8	8.689	1	0.1865	89.0333	5.87044	187.778	1268	0.21429
MPLKIP	2	0	1	2	1.528	2	0.15541	64.1333	5.03968	185.949	1408	0
FCAR	2	0	1	2	2.999	1	0.15541	72.3833	5.37029	183.368	1470	0
TLR5	1304	0.49815	13	13	17.739	1	0.15541	92.9667	5.92555	177.867	2178	0.5
SMAD7	289	0.58315	8	9	15.18	2	0.1865	94.05	6.01032	161.304	1050	0.55556
SUCLA2	8	0.25931	5	5	2.97	1	0.1865	71.9167	5.294	160.463	912	0.4
PDE4B	14	0.47366	4	6	5.803	1	0.1865	82.0167	5.66699	150.376	788	0.4
GADD45B	2088	0.55082	15	15	20.793	1	0.1865	99.85	6.12476	143.288	2160	0.52381
SLC2A14	38	0.40246	7	7	10.352	1	0.1865	90.3333	5.92555	140.175	1326	0.52381
DUSP2	99	0.51223	7	8	10.14	2	0.1865	92.4667	5.98065	137.443	918	0.5
DYNLL1	8	0.37893	4	4	1.812	2	0.15541	63.75	4.94643	135.195	926	0.66667
EGR3	247	0.5854	7	8	12.407	1	0.1865	90.4667	5.92131	129.802	1072	0.57143
NAMPT	4	0.30779	2	4	7.357	3	0.1865	83.6333	5.73481	124.976	1164	0.16667
AREG	148	0.43736	8	8	13.364	4	0.1865	93.1333	5.99336	119.156	1250	0.53571
IRS2	5	0.30898	3	4	7.546	1	0.1865	83.35	5.73481	118.275	1122	0.33333
FOSL2	267	0.52483	8	9	12.672	1	0.1865	86.5333	5.78567	116.294	730	0.5
PFKFB3	15	0.38896	5	6	8.049	1	0.1865	86.35	5.81534	110.662	938	0.4
P2RY13	5042	0.76834	7	9	11.552	1	0.15541	84.9	5.71786	105.677	806	0.58333
PLAUR	727	0.62199	7	8	13.589	1	0.1865	94.7167	6.04423	104.921	986	0.60714
MAD1L1	4	0.30898	3	3	4.698	2	0.1865	84.5	5.79839	95.1578	494	0.66667
DUSP6	67	0.43736	8	9	11.592	1	0.1865	91.3833	5.93826	92.8572	932	0.41667
MKKS	26	0.42794	6	6	8.088	1	0.1865	90.6	5.95522	92.1042	1138	0.6
P2RY14	5041	0.76834	7	8	10.234	1	0.15541	81.4667	5.59494	92.0478	990	0.75
DDIT3	409	0.59666	9	10	15.612	1	0.1865	93.4333	5.98913	84.4757	812	0.55556
IFI16	132	0.51223	7	7	11.12	2	0.1865	89.7167	5.90859	83.3141	1248	0.66667
CCL20	17448	0.61091	15	15	18.611	1	0.15541	90.45	5.80687	81.4234	856	0.58095
RIT1	9	0.46346	3	6	4.472	1	0.15541	72.5833	5.31095	79.7413	542	0.26667
LRRN3	13	0.47366	4	5	4.145	1	0.15541	73.25	5.35758	78.3066	420	0.5
SLC2A3	36	0.47549	6	6	8.911	1	0.1865	89.4167	5.90859	73.8758	940	0.66667
PRKAR1A	20	0.38039	6	6	5.267	1	0.15541	80.5167	5.60341	73.7019	530	0.53333
RPA2	7	0.46346	3	4	5.719	1	0.1865	84.1167	5.7772	72.3702	628	0.5
MAP3K8	246	0.5854	7	7	13.779	1	0.1865	95.85	6.08661	71.5564	1260	0.7619
EEA1	4	0.30779	2	4	6.986	2	0.1865	84.75	5.79839	70.6544	624	0.33333
NR4A2	414	0.51877	10	10	14.723	1	0.1865	92.05	5.94674	64.2699	552	0.57778
ATF1	129	0.47564	7	8	12.401	1	0.1865	86.5667	5.79415	60.71	578	0.46429
JAG1	57	0.43905	7	8	12.995	3	0.1865	92.7167	5.99336	54.9979	570	0.42857
PPP1R15A	366	0.49207	11	11	15.721	2	0.1865	93.85	5.99336	54.481	710	0.52727
MSRB1	3	0.30779	2	3	2.573	1	0.1865	66.2833	5.05664	40.5969	156	0.33333
PTGER2	3	0.30779	2	3	4.671	2	0.15541	71.9333	5.35334	38.2017	258	0.33333
BHLHE40	7	0.46346	3	4	8.43	1	0.1865	88.25	5.89588	36.5154	372	0.5
AHSA1	2	0	1	2	2.873	1	0.1865	73.5833	5.47202	29.4505	424	0
CXCL3	6600	0.66175	11	11	15.39	1	0.15541	85.4	5.69666	29.0366	396	0.70909
MAFF	19	0.45378	5	6	10.228	2	0.1865	85.7167	5.76872	27.7489	376	0.46667
NFIL3	7	0.30779	2	7	7.57	1	0.15541	76.5333	5.46354	27.1353	166	0.04762
DUSP10	8	0.25931	5	5	8.377	1	0.1865	87.4667	5.87044	24.5411	484	0.4
SAMD9L	10202	0.63848	10	10	10.878	1	0.15541	80.2167	5.53984	23.726	186	0.71111
ARFIP1	2	0	1	2	2.452	1	0.15541	72.2667	5.39148	20.2556	76	0
CCL3L1	10	0.32413	5	5	9.578	1	0.1865	82.9667	5.69666	18.0124	514	0.5
TRIB1	2	0	1	2	3.676	1	0.15541	76.35	5.51864	16.4783	70	0
GIMAP1	360	0.65858	7	7	3.31	2	0.13321	63.5357	4.81928	16.2809	346	0.85714
SAMD9	5042	0.64146	8	8	9.423	1	0.15541	76	5.41268	16.0464	82	0.78571
OMA1	3	0.30779	2	3	5.277	1	0.1865	84.7833	5.80687	14.3874	110	0.33333
FOSB	288	0.54893	9	9	12.522	1	0.1865	85.8167	5.76024	12.2026	76	0.63889
ECHDC1	14	0.38896	5	5	3.12	1	0.15541	68.6833	5.17532	10.3389	48	0.6
DBF4	5	0.30898	3	4	3.983	1	0.15541	69.2167	5.21346	9.39893	34	0.33333
TRIM5	264	0.62199	7	7	7.915	1	0.15541	76.3667	5.44235	9.34416	108	0.80952
PMAIP1	270	0.55399	8	8	13.068	1	0.1865	91.85	5.96793	7.6845	98	0.67857
SERPINB2	3	0	1	3	5.099	1	0.15541	76.5833	5.49745	7.12991	78	0
SGK1	4	0.30898	3	3	7.44	1	0.1865	89.2167	5.92979	6.76844	160	0.66667
BCL2A1	126	0.57059	6	6	13.075	1	0.1865	92.4667	5.99336	6.45633	88	0.8
SIK1	30	0.51861	5	5	10.258	1	0.1865	88.7167	5.89588	6.17587	70	0.8
TNFRSF17	3	0.30779	2	3	2.923	1	0.15541	67.6	5.14988	5.35093	32	0.33333
TAF4	4	0.30898	3	3	8.036	1	0.1865	87.2167	5.87468	5.24204	62	0.66667
HDHD1	2	0	1	2	2.505	1	0.1865	67.15	5.13717	4.62778	24	0
SBDS	2	0	1	2	1.362	1	0.15541	51.2333	4.20044	4.5	14	0
NR4A3	8	0.37893	4	4	7.192	1	0.15541	79.95	5.62461	4.11223	72	0.66667
PIGA	2	0	1	2	1.626	1	0.13321	57.1286	4.57344	4	4	0
HIBCH	12	0.47366	4	4	2.927	1	0.15541	68.1833	5.17108	3.83889	30	0.83333
CETN3	4	0.30898	3	3	3.775	1	0.15541	78.0833	5.59494	3.76141	44	0.66667
GIMAP7	240	0.66569	6	6	3.328	1	0.13321	60.4024	4.64549	3.40249	60	0.93333
DDX60	10080	0.78725	8	8	10.246	1	0.15541	79.2167	5.53136	3.33997	78	0.96429
NEK7	2	0	1	2	3.239	1	0.15541	71.9333	5.39572	3.28865	18	0
BANF1	4	0.30898	3	3	6.504	1	0.1865	82.95	5.74753	2.28333	14	0.66667
ASF1A	12	0.47366	4	4	6.108	1	0.1865	84.75	5.79839	1.67448	14	0.83333
ZC3H12A	8	0.37893	4	4	8.603	1	0.15541	83.8	5.72633	1.14497	16	0.66667
SKIL	2	0	1	2	3.564	1	0.15541	70.75	5.30671	0.79167	6	0
DUSP7	4	0.30898	3	3	4.735	1	0.15541	75.9333	5.49745	0.2	2	0.66667
CCL3L3	2	0	1	2	4.147	1	0.13321	64.5119	4.98458	0.18182	2	0
OSM	720	0.71324	6	6	13.802	1	0.1865	87.8	5.82382	0	0	1
THBD	24	0.56839	4	4	10.128	1	0.1865	85.7167	5.78567	0	0	1
RGCC	6	0.46346	3	3	6.754	1	0.1865	84	5.78143	0	0	1
HIST1H1C	6	0.46346	3	3	6.247	1	0.1865	83.5833	5.76872	0	0	1
DDIT4	2	0.30779	2	2	5.384	1	0.1865	82.45	5.74329	0	0	1
JMJD6	1	0	1	1	3.389	1	0.1865	81.3667	5.72209	0	0	0
TP53INP2	1	0	1	1	3.388	1	0.1865	81.3667	5.72209	0	0	0
RNF20	1	0	1	1	3.335	1	0.1865	81.3667	5.72209	0	0	0
HCAR3	5040	0.76834	7	7	10.532	1	0.15541	79.9667	5.56527	0	0	1
OLR1	2	0.30779	2	2	4.796	1	0.15541	76.1833	5.53136	0	0	1
IL1R2	2	0.30779	2	2	5.169	1	0.15541	76.1	5.47626	0	0	1
ICAM2	1	0	1	1	3.071	1	0.15541	75.3	5.48897	0	0	0
CYSLTR1	1	0	1	1	3.159	1	0.15541	75.2	5.49745	0	0	0
TICAM2	1	0	1	1	3.221	1	0.15541	74.05	5.42115	0	0	0
CD1D	2	0.30779	2	2	4.498	1	0.15541	73.65	5.41692	0	0	1
ZNF295	1	0	1	1	2.498	1	0.15541	73.6	5.43387	0	0	0
ZNF260	1	0	1	1	2.66	1	0.15541	73.6	5.43387	0	0	0
ZBTB10	1	0	1	1	2.814	1	0.15541	73.6	5.43387	0	0	0
ZBTB43	1	0	1	1	2.778	1	0.15541	73.6	5.43387	0	0	0
GZF1	1	0	1	1	2.439	1	0.15541	73.6	5.43387	0	0	0
ZNF146	1	0	1	1	3.423	1	0.15541	73.6	5.43387	0	0	0
ZNF331	1	0	1	1	2.401	1	0.15541	73.6	5.43387	0	0	0
ZNF559	1	0	1	1	2.799	1	0.15541	73.6	5.43387	0	0	0
C11orf73	2	0.30779	2	2	3.228	1	0.15541	72.9	5.42115	0	0	1
TNFAIP8L2	6	0.46346	3	3	4.029	1	0.15541	72.6	5.37877	0	0	1
TCL1A	1	0	1	1	3.592	1	0.15541	72	5.40844	0	0	0
PRF1	1	0	1	1	2.95	1	0.15541	71.4667	5.35334	0	0	0
CBX1	1	0	1	1	2.485	1	0.15541	69.2333	5.26433	0	0	0
SKA2	2	0.30779	2	2	2.327	1	0.15541	67.7333	5.20075	0	0	1
DCP1B	1	0	1	1	2.272	1	0.15541	66.5167	5.14565	0	0	0
GABARAPL3	24	0.56839	4	4	3.968	1	0.13321	66.5119	5.0312	0	0	1
ATG4C	24	0.56839	4	4	4.649	1	0.13321	66.5119	5.0312	0	0	1
IFRD1	1	0	1	1	2.408	1	0.15541	66.4667	5.12445	0	0	0
NRIP3	2	0.30779	2	2	3.578	1	0.13321	65.3452	5.01849	0	0	1
TDRD7	1	0	1	1	2.752	1	0.13321	64.9286	4.9973	0	0	0
CARD6	1	0	1	1	2.154	1	0.13321	63.919	5.02273	0	0	0
COPB2	6	0.46346	3	3	1.749	1	0.15541	63.25	4.94219	0	0	1
GPR84	2	0.30779	2	2	2.332	1	0.15541	63.1167	4.95915	0	0	1
CTBP2	1	0	1	1	1.574	1	0.15541	61.1667	4.84471	0	0	0
MARCH1	2	0.30779	2	2	2.14	1	0.13321	60.7024	4.7896	0	0	1
COMMD8	1	0	1	1	1.363	1	0.15541	60.5167	4.85742	0	0	0
GIMAP6	120	0.64826	5	5	2.741	1	0.13321	57.6786	4.52257	0	0	1
CLEC12A	1	0	1	1	1.438	1	0.13321	57.4786	4.64973	0	0	0
FCRL3	1	0	1	1	1.511	1	0.13321	57.4786	4.64973	0	0	0
PTS	1	0	1	1	1.4	1	0.13321	57.4786	4.64973	0	0	0
RAB10	1	0	1	1	1.197	1	0.15541	57.0833	4.63702	0	0	0
DNAJC13	1	0	1	1	1.255	1	0.15541	57.0833	4.63702	0	0	0
MAT2B	1	0	1	1	1.197	1	0.13321	55.5619	4.5141	0	0	0
ENSG00000258588	1	0	1	1	1.521	1	0.13321	54.3286	4.4378	0	0	0
GPR183	1	0	1	1	1.517	1	0.13321	54.1286	4.42085	0	0	0
CLK1	1	0	1	1	1.378	1	0.13321	54.0452	4.43356	0	0	0
BRI3BP	1	0	1	1	1.103	1	0.13321	52.5357	4.34455	0	0	0
HAUS3	2	0.30779	2	2	1.336	1	0.13321	52.1952	4.25554	0	0	1
CSRNP1	1	0	1	1	1.083	1	0.13321	52.0786	4.30217	0	0	0
RGPD2	1	0	1	1	1.249	1	0.13321	51.6286	4.27674	0	0	0
FUNDC1	1	0	1	1	1.328	1	0.11656	50.5107	4.10719	0	0	0
COA3	1	0	1	1	1.107	1	0.11656	44.0964	3.51379	0	0	0
NDUFAF1	2	0.30779	2	2	1.192	1	0.11656	43.6774	3.39935	0	0	1
TIMMDC1	2	0.30779	2	2	1.19	1	0.11656	43.6774	3.39935	0	0	1
MTIF3	6	0.46346	3	3	1.299	1	0.01688	3	0.02813	0	0	1
MRPL51	6	0.46346	3	3	1.297	1	0.01688	3	0.02813	0	0	1
MRPS28	6	0.46346	3	3	1.28	1	0.01688	3	0.02813	0	0	1
MRPS31	6	0.46346	3	3	1.302	1	0.01688	3	0.02813	0	0	1
MITD1	1	0	1	1	1.082	1	0.00844	1	0.02532	0	0	0
C4orf34	1	0	1	1	1.082	1	0.00844	1	0.02532	0	0	0
SLC35A1	1	0	1	1	1.078	1	0.00844	1	0.02532	0	0	0
SLC35B3	1	0	1	1	1.078	1	0.00844	1	0.02532	0	0	0
SC5DL	1	0	1	1	1.079	1	0.00844	1	0.02532	0	0	0
IDI1	1	0	1	1	1.079	1	0.00844	1	0.02532	0	0	0
BTN3A3	1	0	1	1	1.08	1	0.00844	1	0.02532	0	0	0
BTN3A2	1	0	1	1	1.08	1	0.00844	1	0.02532	0	0	0
DTX3L	1	0	1	1	1.079	1	0.00844	1	0.02532	0	0	0
KBTBD8	1	0	1	1	1.079	1	0.00844	1	0.02532	0	0	0
ELL2	1	0	1	1	1.1	1	0.00844	1	0.02532	0	0	0
EAF1	1	0	1	1	1.1	1	0.00844	1	0.02532	0	0	0
