# Supplementary material for: Identification of key genes associated with multiple sclerosis based on gene expression data from peripheral blood mononuclear cells
Source: PeerJ. 2020 Feb 3;8:e8357. doi: 10.7717/peerj.8357 (PMC7003695; doi:10.7717/peerj.8357)
Supplement: Table S4 [file peerj-08-8357-s008.xlsx]

## Sheet: Sheet1
Statistics of miRNA-mRNA-TF regulatory relationship retrieved from database
Database	Interaction	Amount	TFs	miRNAs	mRNAs
Starbase	miRNA-mRNA	244	na	99	13
CHIPBase	TF-mRNA	21	3	na	12
	TF-miRNA	39	4	28	na

## Sheet: Sheet2
Node attributes of net of MS related miRNA and hub genes
node_name	MCC	DMNC	MNC	Degree	EPC	BottleNeck	EcCentricity	Closeness	Radiality	Betweenness	Stress	ClusteringCoefficient
FOS	162	0.13818	38	50	29.245	18	0.33333	74.8333	4.3125	3080.33	19188	0.05469
TP53	136	0.15468	32	45	27.994	31	0.33333	73.5	4.27679	2940.67	16046	0.05657
VEGFA	40	0	1	40	24.287	42	0.33333	66	3.875	2763.41	33114	0
JUN	102	0.16512	26	33	25.998	20	0.33333	68.5	4.15179	1962.07	9902	0.07955
HIF1A	70	0.23034	15	32	24.988	14	0.33333	67.8333	4.13393	2416.87	13312	0.04637
RB1	40	0.19025	12	30	25.363	20	0.33333	63.1667	3.90179	1282.76	13360	0.02989
PTGS2	31	0.19025	12	21	21.755	5	0.33333	57	3.73214	714.052	7288	0.0619
CXCL8	29	0.23755	11	18	21.48	3	0.33333	57.1667	3.79464	536.701	4588	0.0915
OAS2	15	0	1	15	16.738	2	0.25	48.6667	3.38393	439.091	6172	0
NFKBIA	18	0.32929	7	11	16.785	3	0.25	54.25	3.75893	296.565	1658	0.16364
OAS1	13	0.38896	5	10	16.173	3	0.25	50.5833	3.58036	301.027	2046	0.13333
hsa-let-7a-5p	11	0.28529	6	9	19.669	1	0.25	54.25	3.79464	109.537	1946	0.16667
hsa-miR-340-5p	9	0.30898	3	8	17.16	4	0.25	57.4167	3.97321	246.169	3250	0.07143
hsa-let-7e	11	0.28529	6	8	18.645	1	0.25	54.25	3.79464	105.874	1798	0.21429
hsa-miR-155-5p	10	0.47366	4	7	17.998	3	0.25	54.4167	3.83036	103.038	1636	0.2381
hsa-let-7g	11	0.28529	6	7	16.962	1	0.25	54.25	3.79464	82.6515	1390	0.28571
hsa-let-7c	11	0.28529	6	7	16.824	1	0.25	54.25	3.79464	82.6515	1390	0.28571
TNFSF10	7	0	1	7	11.177	1	0.2	42.2	3.125	30.242	342	0
hsa-miR-299-5p	5	0	1	6	15.06	4	0.25	53.75	3.83036	151.101	2704	0
hsa-miR-26b-5p	11	0.45378	5	6	15.569	1	0.25	54.5833	3.83929	85.557	1560	0.46667
hsa-miR-330-3p	25	0.75786	4	5	15.881	1	0.25	56.9167	4.00893	95.3596	2096	0.8
ATF3	5	0.61557	2	5	9.864	1	0.33333	47.8333	3.52679	92.5831	616	0.2
hsa-miR-106b-5p	5	0	1	5	14.107	1	0.25	53.6667	3.83036	108.184	2130	0
hsa-miR-29b-3p	4	0.61557	2	5	14.822	1	0.25	53.6667	3.84821	109.289	2392	0.2
hsa-miR-27a-3p	12	0.66313	4	5	14.769	1	0.25	51.0833	3.67857	4.11906	54	0.7
hsa-miR-26a-5p	6	0.46346	3	5	13.836	1	0.25	52.4167	3.74107	59.8416	1140	0.3
hsa-miR-24-3p	7	0.77244	3	5	14.502	1	0.25	55.25	3.9375	87.6333	2148	0.5
hsa-miR-20b-5p	5	0	1	5	13.026	1	0.25	53.6667	3.83036	108.184	2130	0
hsa-miR-20a-5p	5	0	1	5	14.428	1	0.25	53.6667	3.83036	108.184	2130	0
hsa-miR-17-5p	5	0	1	5	13.748	1	0.25	53.6667	3.83036	108.184	2130	0
hsa-miR-4677-3p	5	0.30898	3	4	12.582	3	0.25	50.3333	3.61607	17.3261	324	0.33333
hsa-miR-365a-3p	4	0.30898	3	4	12.922	1	0.25	49.0833	3.5625	5.56369	112	0.33333
hsa-miR-342-3p	5	0.46346	3	4	13.377	1	0.25	54.25	3.88393	60.9789	1482	0.5
hsa-miR-338-3p	8	0.47366	4	4	12.458	1	0.25	52.4167	3.75	8.64218	148	0.83333
hsa-miR-335-5p	4	0.30779	2	4	12.329	1	0.25	53	3.80357	82.7442	1440	0.16667
hsa-miR-186	4	0	1	4	11.936	1	0.25	52.5833	3.78571	77.0681	1612	0
hsa-miR-143-3p	3	0	1	4	12.571	1	0.25	51.75	3.75893	80.0194	1856	0
hsa-miR-141-3p	5	0.46346	3	4	12.259	1	0.25	53.0833	3.8125	59.2151	1198	0.5
hsa-miR-130a-3p	5	0.30898	3	4	11.815	1	0.25	50.8333	3.65179	43.8774	712	0.33333
hsa-miR-29a-3p	4	0.61557	2	4	12.541	1	0.25	53.6667	3.84821	83.7446	1672	0.33333
hsa-miR-23a-3p	5	0.46346	3	4	13.232	1	0.25	54.5833	3.90179	60.6714	1686	0.5
hsa-miR-22-3p	6	0.77244	3	4	13.617	1	0.25	50.0833	3.64286	0	0	0.83333
hsa-miR-9-5p	4	0	1	4	12.315	1	0.25	49.8333	3.59821	37.6669	526	0
hsa-miR-379-5p	3	0	1	3	9.452	2	0.25	50.75	3.69643	69.2911	948	0
hsa-miR-361-5p	3	0	1	3	11.003	1	0.25	50.9167	3.70536	43.2119	992	0
hsa-miR-223	3	0.30779	2	3	9.833	1	0.25	47.3333	3.48214	10.7198	194	0.33333
hsa-miR-219a-5p	4	0.46346	3	3	9.964	1	0.25	48.0833	3.51786	7.66255	94	1
hsa-miR-200c-3p	6	0.61795	3	3	10.377	1	0.25	47.9167	3.50893	0	0	1.33333
hsa-miR-196a-5p	3	0.30779	2	3	8.323	1	0.25	45.25	3.35714	11.7027	122	0.33333
hsa-miR-181d-5p	3	0.30779	2	3	10.622	1	0.25	51.25	3.73214	30.2087	836	0.33333
hsa-miR-181c-5p	3	0.30779	2	3	9.604	1	0.25	51.25	3.73214	30.2087	836	0.33333
hsa-miR-181b-5p	3	0.30779	2	3	10.09	1	0.25	51.25	3.73214	30.2087	836	0.33333
hsa-miR-181a-5p	3	0.30779	2	3	10.464	1	0.25	51.25	3.73214	30.2087	836	0.33333
hsa-miR-146b-5p	3	0	1	3	8.437	1	0.25	48.6667	3.5625	32.3552	544	0
hsa-miR-142-5p	3	0	1	3	10.372	1	0.25	49.25	3.60714	20.5938	506	0
hsa-miR-139-5p	3	0.61557	2	3	10.317	1	0.25	52.25	3.78571	45.7265	1020	0.66667
hsa-miR-134-5p	3	0	1	3	8.013	1	0.25	48.5833	3.57143	42.9735	602	0
hsa-miR-128-3p	3	0.61557	2	3	10.496	1	0.25	49.75	3.625	11.7267	258	0.66667
hsa-miR-30a-5p	6	0.77244	3	3	11.379	1	0.25	50.0833	3.64286	0	0	1.66667
hsa-miR-27b-3p	4	0.30898	3	3	9.303	1	0.25	48.1667	3.51786	4.11906	54	0.66667
hsa-miR-7-5p	4	0.46346	3	3	11.232	1	0.25	50.9167	3.6875	4.43125	134	1
hsa-miR-584-5p	2	0.30779	2	2	8.155	1	0.25	48.25	3.54464	0	0	1
hsa-miR-449b-5p	2	0	1	2	6.608	1	0.25	44.3333	3.29464	9.36957	124	0
hsa-miR-320a	2	0.30779	2	2	8.145	1	0.25	45.9167	3.38393	0	0	1
hsa-miR-218-5p	2	0.61557	2	2	8.744	1	0.25	48.0833	3.55357	0	0	2
hsa-miR-214-3p	2	0	1	2	6.513	1	0.25	44.5833	3.25893	14.6201	328	0
hsa-miR-200b-3p	2	0.30779	2	2	6.916	1	0.25	44.1667	3.29464	0	0	1
hsa-miR-199a-5p	2	0	1	2	6.943	1	0.25	47.9167	3.55357	23.3149	456	0
hsa-miR-193b-3p	2	0	1	2	7.341	1	0.25	45.3333	3.38393	3.49524	72	0
hsa-miR-190a-5p	2	0	1	2	6.396	1	0.25	43.9167	3.30357	6.64683	104	0
hsa-miR-152-3p	2	0	1	2	6.019	1	0.25	42.1667	3.04464	15.8256	282	0
hsa-miR-151a-3p	2	0.30779	2	2	7.749	1	0.25	47.0833	3.47321	0	0	1
hsa-miR-150-5p	2	0	1	2	7.505	1	0.25	46.0833	3.375	14.3333	424	0
hsa-miR-148a-3p	2	0	1	2	5.295	1	0.25	42.3333	3.11607	10.937	68	0
hsa-miR-146a-5p	2	0	1	2	5.707	1	0.25	39.6667	2.91964	6.63977	124	0
hsa-miR-145-5p	2	0	1	2	7.78	1	0.25	50.0833	3.67857	26.3182	620	0
hsa-miR-124-3p	2	0	1	2	7.185	1	0.25	46.1667	3.41964	7.29546	124	0
hsa-miR-96-5p	2	0	1	2	6.153	1	0.25	43.1667	3.24107	14.7021	96	0
hsa-miR-92a-3p	2	0.30779	2	2	8.217	1	0.25	47.1667	3.48214	0	0	1
hsa-miR-34a-5p	2	0	1	2	6.026	1	0.25	44.3333	3.29464	9.36957	124	0
hsa-miR-30b-5p	2	0.61557	2	2	8.225	1	0.25	46.25	3.4375	0	0	2
hsa-miR-25-3p	2	0.30779	2	2	7.636	1	0.25	47.1667	3.48214	0	0	1
hsa-miR-23b-3p	2	0	1	2	6.944	1	0.25	46.0833	3.375	14.3333	424	0
hsa-miR-19b-3p	2	0.30779	2	2	7.783	1	0.25	47.0833	3.47321	0	0	1
hsa-miR-19a-3p	2	0.30779	2	2	7.883	1	0.25	47.0833	3.47321	0	0	1
IL1B	1	0	1	1	5.386	1	0.25	43.75	3.32143	0	0	0
DDX58	1	0	1	1	4.341	1	0.25	43.75	3.32143	0	0	0
hsa-miR-671-5p	1	0	1	1	3.459	1	0.2	32.9	2.39286	0	0	0
hsa-miR-650	1	0	1	1	5.049	1	0.25	43.25	3.28571	0	0	0
hsa-miR-629-5p	1	0	1	1	4.141	1	0.25	39.5	2.88393	0	0	0
hsa-miR-599	1	0	1	1	4.869	1	0.25	41.4167	3.16071	0	0	0
hsa-miR-532-5p	1	0	1	1	4.561	1	0.25	38.9167	2.91071	0	0	0
hsa-miR-497-5p	1	0	1	1	4.036	1	0.25	39.5	2.88393	0	0	0
hsa-miR-491-5p	1	0	1	1	5.435	1	0.25	43.25	3.28571	0	0	0
hsa-miR-486-5p	1	0	1	1	4.119	1	0.25	39.5	2.88393	0	0	0
hsa-miR-431-5p	1	0	1	1	5.249	1	0.25	43.75	3.32143	0	0	0
hsa-miR-376a-3p	1	0	1	1	5.003	1	0.25	41.1667	3.14286	0	0	0
hsa-miR-320b	1	0	1	1	4.739	1	0.25	41.1667	3.14286	0	0	0
hsa-miR-195-5p	1	0	1	1	3.998	1	0.25	39.5	2.88393	0	0	0
hsa-miR-193a-3p	1	0	1	1	4.273	1	0.25	36.9167	2.80357	0	0	0
hsa-miR-142-3p	1	0	1	1	4.074	1	0.25	36.5833	2.74107	0	0	0
hsa-miR-140-5p	1	0	1	1	4.204	1	0.25	39.5	2.88393	0	0	0
hsa-miR-140-3p	1	0	1	1	4.173	1	0.25	41.1667	3.14286	0	0	0
hsa-miR-129-2-3p	1	0	1	1	4.468	1	0.25	38.9167	2.91071	0	0	0
hsa-miR-31-5p	1	0	1	1	3.393	1	0.2	34.2833	2.58929	0	0	0
hsa-miR-30e-5p	1	0	1	1	4.795	1	0.25	41.4167	3.16071	0	0	0
hsa-miR-30d-5p	1	0	1	1	4.447	1	0.25	41.4167	3.16071	0	0	0
hsa-miR-30c-5p	1	0	1	1	4.837	1	0.25	41.4167	3.16071	0	0	0
hsa-miR-28-5p	1	0	1	1	4.648	1	0.25	41.1667	3.14286	0	0	0
hsa-miR-18b-5p	1	0	1	1	4.179	1	0.25	41.1667	3.14286	0	0	0
hsa-miR-18a-5p	1	0	1	1	4.606	1	0.25	41.1667	3.14286	0	0	0
hsa-miR-16-5p	1	0	1	1	4.306	1	0.25	39.5	2.88393	0	0	0
hsa-miR-15a-5p	1	0	1	1	4.82	1	0.25	39.5	2.88393	0	0	0
