# Supplementary material for: Identification of key genes associated with multiple sclerosis based on gene expression data from peripheral blood mononuclear cells
Source: PeerJ. 2020 Feb 3;8:e8357. doi: 10.7717/peerj.8357 (PMC7003695; doi:10.7717/peerj.8357)
Supplement: Table S5 [file peerj-08-8357-s009.xlsx]

## Sheet: Sheet1
Retrieved result by DEG_eSNP from mirSNP DataBase
SNP ID	Gene Symble	miRNA
35440828	ADM	hsa-miR-1185-5p
2070889	OSM	hsa-miR-1247-5p
62521034	TRIB1	hsa-miR-1253
7562	FOSL2	hsa-miR-1275
4698	ADM	hsa-miR-181a-5p
4698	ADM	hsa-miR-181b-5p
4698	ADM	hsa-miR-181c-5p
4698	ADM	hsa-miR-181d
1060257	SLC7A5	hsa-miR-212-5p
56407566	CBX1	hsa-miR-212-5p
62521034	TRIB1	hsa-miR-2467-5p
1049160	VEGFA	hsa-miR-3150a-3p
3025053	VEGFA	hsa-miR-324-5p
35440828	ADM	hsa-miR-3679-5p
17405319	TRIB1	hsa-miR-3692-5p
7075	KRCC1	hsa-miR-374a-5p
7075	KRCC1	hsa-miR-374b-5p
1042535	TP53	hsa-miR-380-5p
3047288	BTN3A2	hsa-miR-3918
62521034	TRIB1	hsa-miR-3919
4698	ADM	hsa-miR-4262
696	NFKBIA	hsa-miR-4302
4698	ADM	hsa-miR-4329
1049160	VEGFA	hsa-miR-4450
1049160	VEGFA	hsa-miR-450a-3p
56395423	TRIB1	hsa-miR-450a-3p
7562	FOSL2	hsa-miR-4665-5p
1049160	VEGFA	hsa-miR-4700-5p
7562	FOSL2	hsa-miR-4731-5p
1049160	VEGFA	hsa-miR-4731-5p
7104648	TRIM6	hsa-miR-4753-3p
2070889	OSM	hsa-miR-4763-3p
2070889	OSM	hsa-miR-486-3p
1049160	VEGFA	hsa-miR-505-5p
7562	FOSL2	hsa-miR-5196-5p
62521034	TRIB1	hsa-miR-5197-3p
1053433	KCTD12	hsa-miR-548n
62521034	TRIB1	hsa-miR-5581-3p
1042535	TP53	hsa-miR-563
35440828	ADM	hsa-miR-5692b
35440828	ADM	hsa-miR-5692c
7562	FOSL2	hsa-miR-5698
7562	FOSL2	hsa-miR-637
4698	ADM	hsa-miR-720
1049160	VEGFA	hsa-miR-939
11348357	LBH	hsa-miR-1244
11929781	ARFIP1	hsa-miR-1252
6673	CRYZ	hsa-miR-126-5p
4020751	RIT1	hsa-miR-1277-5p
11929781	ARFIP1	hsa-miR-136-5p
4648291	PTGS2	hsa-miR-2116-5p
10050965	CARD6	hsa-miR-2682-3p
17633107	THBS1	hsa-miR-29b-1-5p
6457937	CDKN1A	hsa-miR-3135b
11348357	LBH	hsa-miR-3148
55692642	HIATL1	hsa-miR-3613-3p
63013160	MXD1	hsa-miR-3662
10397	SUCLA2	hsa-miR-3686
7230	PDHB	hsa-miR-370
17633107	THBS1	hsa-miR-3938
1043864	SNX9	hsa-miR-4290
2289047	IRS2	hsa-miR-4461
1349027	CLEC12A	hsa-miR-4493
6457937	CDKN1A	hsa-miR-4531
11929781	ARFIP1	hsa-miR-4533
63013160	MXD1	hsa-miR-4647
63013160	MXD1	hsa-miR-4662b
1043864	SNX9	hsa-miR-4667-3p
1043864	SNX9	hsa-miR-4713-5p
17633107	THBS1	hsa-miR-4762-3p
10397	SUCLA2	hsa-miR-4775
56656269	PFKFB3	hsa-miR-493-3p
60687169	GIMAP7	hsa-miR-5011-5p
41315060	THBS1	hsa-miR-509-3-5p
1043864	SNX9	hsa-miR-629-3p
10050965	CARD6	hsa-miR-877-3p
41315060	THBS1	hsa-miR-92a-2-5p
5008	ADM	hsa-let-7a-2-3p
35579124	MAP3K8	hsa-let-7a-2-3p
2855658	CYP1B1	hsa-let-7a-3p
1017732	EREG	hsa-let-7a-3p
10414707	FCAR	hsa-let-7a-3p
9333352	NFKBIA	hsa-let-7a-3p
3176927	PDE4B	hsa-let-7a-3p
13475	ACN9	hsa-let-7a-3p
62525317	ATP6V1C1	hsa-let-7a-5p
2855658	CYP1B1	hsa-let-7b-3p
10414707	FCAR	hsa-let-7b-3p
9333352	NFKBIA	hsa-let-7b-3p
3176927	PDE4B	hsa-let-7b-3p
13475	ACN9	hsa-let-7b-3p
62525317	ATP6V1C1	hsa-let-7b-5p
62525317	ATP6V1C1	hsa-let-7c
41301202	PRKACB	hsa-let-7d-3p
62525317	ATP6V1C1	hsa-let-7d-5p
2855658	CYP1B1	hsa-let-7f-1-3p
10414707	FCAR	hsa-let-7f-1-3p
9333352	NFKBIA	hsa-let-7f-1-3p
3176927	PDE4B	hsa-let-7f-1-3p
13475	ACN9	hsa-let-7f-1-3p
1126716	ADM	hsa-let-7f-2-3p
5008	ADM	hsa-let-7g-3p
62525317	ATP6V1C1	hsa-let-7g-5p
62525317	ATP6V1C1	hsa-let-7i-5p
4734685	ATP6V1C1	hsa-miR-1
57315098	PDE4B	hsa-miR-100-3p
34492231	LRRN3	hsa-miR-101-3p
1802040	VEGFA	hsa-miR-103a-2-5p
1042757	ST6GAL1	hsa-miR-103a-3p
5029966	TNFAIP3	hsa-miR-103a-3p
10361	GIMAP5	hsa-miR-103a-3p
10361	GIMAP1-GIMAP5	hsa-miR-103a-3p
577	SNX9	hsa-miR-105-3p
6912748	SNX9	hsa-miR-105-3p
8082254	PRKAR1A	hsa-miR-105-5p
6683	ECHDC1	hsa-miR-105-5p
1042273	GPR183	hsa-miR-106a-5p
1137363	TMEM69	hsa-miR-106a-5p
1042273	GPR183	hsa-miR-106b-5p
3093280	FGL2	hsa-miR-106b-5p
1137363	TMEM69	hsa-miR-106b-5p
1042757	ST6GAL1	hsa-miR-107
5029966	TNFAIP3	hsa-miR-107
10361	GIMAP5	hsa-miR-107
10361	GIMAP1-GIMAP5	hsa-miR-107
6912748	SNX9	hsa-miR-10a-5p
15306	GADD45B	hsa-miR-10b-3p
4648300	PTGS2	hsa-miR-10b-3p
6732	KCTD12	hsa-miR-10b-3p
1799885	CYP1B1	hsa-miR-1178
1803605	FOSB	hsa-miR-1178
3188824	GBP1	hsa-miR-1179
62208115	C20orf118	hsa-miR-1179
1126517	ADM	hsa-miR-1182
1064899	PFKFB3	hsa-miR-1183
1064900	PFKFB3	hsa-miR-1183
55671274	OAS2	hsa-miR-1185-5p
1126722	PDHB	hsa-miR-1185-5p
1801380	ST6GAL1	hsa-miR-1185-5p
1491980	P2RY13	hsa-miR-1185-5p
12312458	ETNK1	hsa-miR-1185-5p
4150239	HBEGF	hsa-miR-1197
11541872	PHLDA1	hsa-miR-1202
1064900	PFKFB3	hsa-miR-1206
1794292	TP53	hsa-miR-1207-3p
1794293	TP53	hsa-miR-1207-3p
34779845	DTX3L	hsa-miR-1207-3p
13385	HBEGF	hsa-miR-1207-5p
11671026	FOSB	hsa-miR-1207-5p
1044062	STX7	hsa-miR-1207-5p
45458901	TP53INP2	hsa-miR-1207-5p
10206415	LBH	hsa-miR-1207-5p
41301192	PRKACB	hsa-miR-122-3p
8007589	C14orf119	hsa-miR-1224-3p
7231	PDHB	hsa-miR-1224-5p
34857337	LBH	hsa-miR-1224-5p
11210432	FPGT	hsa-miR-1226-3p
11569610	NFKBIA	hsa-miR-1226-5p
35993958	TP53	hsa-miR-1233
13124044	DCK	hsa-miR-1236
13124045	DCK	hsa-miR-1236
689468	PTGS2	hsa-miR-1236
34773212	BTN3A2	hsa-miR-1236
2240774	JMJD6	hsa-miR-1236
35572620	RGS1	hsa-miR-1237
34662212	DCK	hsa-miR-1244
45628236	FOS	hsa-miR-1244
34637389	BTN3A2	hsa-miR-1245a
1051495	JAG1	hsa-miR-1245b-3p
1042618	PTGER2	hsa-miR-1245b-3p
6957664	GIMAP8	hsa-miR-1245b-3p
1044068	STX7	hsa-miR-124-5p
952827	GIMAP8	hsa-miR-1246
5006	ADM	hsa-miR-1247-3p
55783502	CX3CR1	hsa-miR-1247-5p
10424098	FOSB	hsa-miR-1247-5p
11465460	HBEGF	hsa-miR-1248
34194442	OAS2	hsa-miR-1248
59038032	PPIF	hsa-miR-1248
2453995	ATP6V1C1	hsa-miR-1251
1130690	PLGLB2	hsa-miR-1251
1130690	PLGLB1	hsa-miR-1251
4734685	ATP6V1C1	hsa-miR-1252
34354934	OAS1	hsa-miR-1252
6835	KCTD12	hsa-miR-1252
9917371	MXD1	hsa-miR-1253
62145230	PLGLB2	hsa-miR-1253
34857337	LBH	hsa-miR-1255a
9770	BTN3A3	hsa-miR-1255b-2-3p
34857337	LBH	hsa-miR-1255b-5p
12475412	MXD1	hsa-miR-125a-3p
3021485	CD1D	hsa-miR-125b-2-3p
11465458	HBEGF	hsa-miR-125b-2-3p
2240772	JMJD6	hsa-miR-1260b
1889490	PRF1	hsa-miR-1261
753121	PPIF	hsa-miR-1262
7689343	ARFIP1	hsa-miR-1262
4646431	CYP1B1	hsa-miR-1264
2230341	GPR183	hsa-miR-1264
45501991	PTGER2	hsa-miR-1264
1060254	SLC7A5	hsa-miR-1264
6977687	DBF4	hsa-miR-1264
10713741	GCA	hsa-miR-1264
2248718	ATP6V1C1	hsa-miR-1265
12798155	TRIM34	hsa-miR-1265
62579753	HIATL1	hsa-miR-1265
12798155	TRIM6-TRIM34	hsa-miR-1265
7911	GBP1	hsa-miR-126-5p
10233682	DBF4	hsa-miR-126-5p
2240775	JMJD6	hsa-miR-126-5p
1126517	ADM	hsa-miR-1266
3180688	FOS	hsa-miR-1266
41291287	PFKFB3	hsa-miR-1266
1046922	PHLDA1	hsa-miR-1266
3180364	ZC3H12A	hsa-miR-1266
1803055	JAG1	hsa-miR-1267
35686785	DCK	hsa-miR-1269a
9558	LBH	hsa-miR-1269a
35686785	DCK	hsa-miR-1269b
9558	LBH	hsa-miR-1269b
17880703	PLK3	hsa-miR-1270
4251924	PLAUR	hsa-miR-1271-5p
35320531	CYP1B1	hsa-miR-1272
17099190	HIF1A	hsa-miR-1272
2286585	JMJD6	hsa-miR-1272
61303135	TRIM5	hsa-miR-1272
12400	C14orf119	hsa-miR-1273a
4648301	PTGS2	hsa-miR-1273e
1803523	SLC7A5	hsa-miR-1273e
17880703	PLK3	hsa-miR-1273f
1042273	GPR183	hsa-miR-1273f
7607134	MXD1	hsa-miR-1273f
1042526	TP53	hsa-miR-1273f
4821766	MAFF	hsa-miR-1273f
2453995	ATP6V1C1	hsa-miR-1273g-3p
12500	CSF1R	hsa-miR-1273g-3p
12490075	DTX3L	hsa-miR-1273g-3p
34779845	DTX3L	hsa-miR-1273g-3p
1046363	CDK2AP2	hsa-miR-1275
3169944	CCL3	hsa-miR-1276
1017732	EREG	hsa-miR-1277-5p
4647016	JUN	hsa-miR-1277-5p
41301210	PRKACB	hsa-miR-1277-5p
2184934	RIT1	hsa-miR-1277-5p
17881999	ZFP36	hsa-miR-1277-5p
11117304	SLC7A5	hsa-miR-1277-5p
12798155	TRIM34	hsa-miR-1279
12316161	ETNK1	hsa-miR-1279
12798155	TRIM6-TRIM34	hsa-miR-1279
1539233	PFKFB3	hsa-miR-128
1044062	STX7	hsa-miR-128
34637389	BTN3A2	hsa-miR-128
1811095	TP53	hsa-miR-1280
1811096	TP53	hsa-miR-1280
6093564	C20orf118	hsa-miR-1281
13218591	BTN3A2	hsa-miR-1282
5859247	DCK	hsa-miR-1283
1042481	DPYD	hsa-miR-1283
3215279	DUSP10	hsa-miR-1283
1049698	FOSB	hsa-miR-1285-3p
1058920	CSF1R	hsa-miR-1285-5p
28381254	FOSB	hsa-miR-1286
35293303	HSD17B4	hsa-miR-1286
45472599	PTGER2	hsa-miR-1287
6060004	TP53INP2	hsa-miR-1288
5995550	MAFF	hsa-miR-1290
1053591	SBDS	hsa-miR-1290
35550891	GIMAP8	hsa-miR-1291
35904042	TRIB1	hsa-miR-1294
3867461	CTBP2	hsa-miR-1295b-3p
10052625	CARD6	hsa-miR-1295b-3p
4150238	HBEGF	hsa-miR-1295b-5p
1050648	CD83	hsa-miR-1295b-5p
3208624	CTBP2	hsa-miR-129-5p
1056843	CYP1B1	hsa-miR-129-5p
3768671	YPEL5	hsa-miR-129-5p
41314497	MINPP1	hsa-miR-1297
11046539	ETNK1	hsa-miR-1299
11046540	ETNK1	hsa-miR-1299
12349	GZF1	hsa-miR-1299
3199147	CTBP2	hsa-miR-1302
9733	GOLPH3L	hsa-miR-1303
708905	FOSB	hsa-miR-1304-3p
11554721	ST6GAL1	hsa-miR-1304-3p
35812684	XAF1	hsa-miR-1304-3p
3176357	CDKN1A	hsa-miR-1304-5p
41272170	CDKN1A	hsa-miR-1304-5p
1046283	FOS	hsa-miR-1304-5p
17099190	HIF1A	hsa-miR-1305
2289046	IRS2	hsa-miR-1306-5p
1060254	SLC7A5	hsa-miR-130a-3p
1137363	TMEM69	hsa-miR-130a-3p
3179769	THBD	hsa-miR-130a-5p
3732824	TIPARP	hsa-miR-130a-5p
62318855	ANKRD33B	hsa-miR-130a-5p
1060254	SLC7A5	hsa-miR-130b-3p
1137363	TMEM69	hsa-miR-130b-3p
1131542	TNFSF10	hsa-miR-130b-5p
7248	GABARAPL1	hsa-miR-130b-5p
3742486	C14orf119	hsa-miR-130b-5p
7601357	FOSL2	hsa-miR-1321
12779059	PPIF	hsa-miR-1321
9972278	C14orf119	hsa-miR-1321
35550891	GIMAP8	hsa-miR-1321
11552593	PRKACB	hsa-miR-1323
13475	ACN9	hsa-miR-1323
10802502	NLRP3	hsa-miR-1323
7963767	MAT2A	hsa-miR-1324
10361	GIMAP5	hsa-miR-1324
9435	ETNK1	hsa-miR-1324
10361	GIMAP1-GIMAP5	hsa-miR-1324
3826598	PMAIP1	hsa-miR-134
41282644	VEGFA	hsa-miR-134
35919705	TP53	hsa-miR-1343
8019084	HIF1A	hsa-miR-135a-5p
34873475	HIF1A	hsa-miR-135a-5p
7967134	MAT2A	hsa-miR-135a-5p
28412469	XAF1	hsa-miR-135a-5p
45616942	OAS2	hsa-miR-135b-3p
2687	PLAUR	hsa-miR-135b-3p
8019084	HIF1A	hsa-miR-135b-5p
34873475	HIF1A	hsa-miR-135b-5p
7967134	MAT2A	hsa-miR-135b-5p
28412469	XAF1	hsa-miR-135b-5p
3830766	G0S2	hsa-miR-136-5p
12798155	TRIM34	hsa-miR-137
12798155	TRIM6-TRIM34	hsa-miR-137
41544618	RPA2	hsa-miR-138-1-3p
45575441	OAS2	hsa-miR-139-5p
55703732	OAS2	hsa-miR-139-5p
56078692	OAS2	hsa-miR-139-5p
56157208	OAS2	hsa-miR-139-5p
13376116	PRKACB	hsa-miR-139-5p
15459	BTG3	hsa-miR-139-5p
9835495	EAF1	hsa-miR-139-5p
1042642	ST6GAL1	hsa-miR-140-3p
58831255	C14orf119	hsa-miR-140-3p
17848065	ACADM	hsa-miR-140-5p
4648294	PTGS2	hsa-miR-140-5p
4648294	PTGS2	hsa-miR-141-3p
11554162	SGK1	hsa-miR-141-3p
35572620	RGS1	hsa-miR-141-5p
11947521	ATP10D	hsa-miR-141-5p
1803899	ACSL1	hsa-miR-142-3p
28943595	HSD17B4	hsa-miR-142-3p
34396430	HSPA1B	hsa-miR-142-3p
41268577	SNX9	hsa-miR-142-3p
4645858	FOS	hsa-miR-142-5p
3188893	GBP1	hsa-miR-142-5p
17757228	GZF1	hsa-miR-142-5p
17520676	LRRK2	hsa-miR-142-5p
1042692	DUSP4	hsa-miR-143-3p
1042693	DUSP4	hsa-miR-143-3p
61758580	ATP10D	hsa-miR-143-3p
14573	TXNDC9	hsa-miR-143-5p
4337937	FBLIM1	hsa-miR-143-5p
35579124	MAP3K8	hsa-miR-144-3p
35007750	CYP1B1	hsa-miR-145-3p
4648300	PTGS2	hsa-miR-145-3p
7765016	ASF1A	hsa-miR-145-3p
58791443	RANBP2	hsa-miR-145-5p
41281150	HIATL1	hsa-miR-145-5p
41271295	CD83	hsa-miR-1468
6769752	ACTL6A	hsa-miR-146a-3p
62208020	GZF1	hsa-miR-146b-3p
2248718	ATP6V1C1	hsa-miR-147a
41391746	CX3CR1	hsa-miR-147a
1061422	ZNF331	hsa-miR-147a
55882158	FPGT	hsa-miR-147b
3208579	CTBP2	hsa-miR-148a-5p
1042481	DPYD	hsa-miR-148a-5p
1060255	YPEL5	hsa-miR-148b-5p
11786226	ATP6V1C1	hsa-miR-149-3p
2066933	CSF1R	hsa-miR-149-3p
3216780	CSF1R	hsa-miR-149-3p
7601357	FOSL2	hsa-miR-149-3p
3214277	GADD45B	hsa-miR-149-3p
1042526	TP53	hsa-miR-149-3p
55882158	FPGT	hsa-miR-149-3p
34857337	LBH	hsa-miR-149-3p
2234687	IFNG	hsa-miR-149-5p
1042618	PTGER2	hsa-miR-150-3p
582752	KCTD12	hsa-miR-150-3p
11884725	FOSL2	hsa-miR-151b
1060254	SLC7A5	hsa-miR-152
56858247	EREG	hsa-miR-153
6141507	TP53INP2	hsa-miR-153
3176134	THBD	hsa-miR-1539
35007233	GALNT7	hsa-miR-154-5p
1126700	ATF3	hsa-miR-155-5p
45629236	FOS	hsa-miR-155-5p
12641970	ATP10D	hsa-miR-155-5p
1053969	EREG	hsa-miR-1587
2816308	RGS1	hsa-miR-1587
2286585	JMJD6	hsa-miR-1587
3208571	CTBP2	hsa-miR-15a-3p
7967134	MAT2A	hsa-miR-15a-3p
11541879	SLC7A5	hsa-miR-15a-3p
11557531	C17orf62	hsa-miR-15a-3p
6097	SERPINB2	hsa-miR-15a-5p
6097	SERPINB2	hsa-miR-15b-5p
10361	GIMAP5	hsa-miR-15b-5p
10361	GIMAP1-GIMAP5	hsa-miR-15b-5p
9341262	CYP1B1	hsa-miR-16-1-3p
14860	ZFP36	hsa-miR-16-2-3p
571848	FPGT	hsa-miR-16-2-3p
6977504	DBF4	hsa-miR-16-2-3p
6097	SERPINB2	hsa-miR-16-5p
1804171	PCMT1	hsa-miR-16-5p
1042273	GPR183	hsa-miR-17-5p
1137363	TMEM69	hsa-miR-17-5p
28382129	TAF4	hsa-miR-181a-5p
3803332	C15orf48	hsa-miR-181a-5p
1365770	LRRK2	hsa-miR-181a-5p
11554721	ST6GAL1	hsa-miR-181b-3p
41282644	VEGFA	hsa-miR-181b-3p
3183732	STX7	hsa-miR-181b-3p
9835495	EAF1	hsa-miR-181b-3p
3034	MAP3K8	hsa-miR-181b-5p
58665242	PMAIP1	hsa-miR-181b-5p
28382129	TAF4	hsa-miR-181b-5p
3803332	C15orf48	hsa-miR-181b-5p
1365770	LRRK2	hsa-miR-181b-5p
3034	MAP3K8	hsa-miR-181c-5p
58665242	PMAIP1	hsa-miR-181c-5p
28382129	TAF4	hsa-miR-181c-5p
1365770	LRRK2	hsa-miR-181c-5p
34354539	ADM	hsa-miR-181d
3034	MAP3K8	hsa-miR-181d
28382129	TAF4	hsa-miR-181d
3803332	C15orf48	hsa-miR-181d
1365770	LRRK2	hsa-miR-181d
704074	DUSP6	hsa-miR-182-3p
12490075	DTX3L	hsa-miR-1825
1042692	DUSP4	hsa-miR-182-5p
1042693	DUSP4	hsa-miR-182-5p
1049176	CCL3	hsa-miR-182-5p
1049176	CCL3L3	hsa-miR-182-5p
5006	ADM	hsa-miR-1827
56745384	EREG	hsa-miR-1827
62087489	PRKAR1A	hsa-miR-1827
41383045	THBS1	hsa-miR-1827
41527948	THBS1	hsa-miR-1827
2240775	JMJD6	hsa-miR-183-3p
13306851	THBD	hsa-miR-184
56040843	ZBTB43	hsa-miR-185-3p
1064891	PFKFB3	hsa-miR-185-5p
2853805	PTGS2	hsa-miR-186-3p
3835508	PTGS2	hsa-miR-186-3p
3170940	ZC3H12A	hsa-miR-186-3p
1064894	PFKFB3	hsa-miR-186-5p
10853045	C17orf72	hsa-miR-18a-3p
1051544	PRKACB	hsa-miR-18a-5p
1051544	PRKACB	hsa-miR-18b-5p
1049698	FOSB	hsa-miR-1909-3p
8512	IER3	hsa-miR-1909-3p
4150238	HBEGF	hsa-miR-1912
1126594	GPR183	hsa-miR-1912
3181718	GPR183	hsa-miR-1912
1050648	CD83	hsa-miR-1912
3829148	PFKFB3	hsa-miR-1915-3p
1049479	RGS1	hsa-miR-1915-3p
41282153	RNF20	hsa-miR-1915-3p
1048608	EAF1	hsa-miR-1915-5p
1049739	FOSB	hsa-miR-192-3p
2240772	JMJD6	hsa-miR-192-3p
1060252	SLC7A5	hsa-miR-192-5p
1126517	ADM	hsa-miR-193a-5p
3176133	THBD	hsa-miR-193a-5p
12206621	BTN3A2	hsa-miR-193a-5p
1051442	THBS1	hsa-miR-193b-5p
56078692	OAS2	hsa-miR-194-3p
1051529	PRKACB	hsa-miR-194-3p
1803697	HBEGF	hsa-miR-194-5p
14860	ZFP36	hsa-miR-195-3p
571848	FPGT	hsa-miR-195-3p
6977504	DBF4	hsa-miR-195-3p
6097	SERPINB2	hsa-miR-195-5p
1804171	PCMT1	hsa-miR-195-5p
1053418	KCTD12	hsa-miR-196a-3p
2057482	HIF1A	hsa-miR-196a-5p
35997067	XAF1	hsa-miR-196a-5p
2057482	HIF1A	hsa-miR-196b-5p
35997067	XAF1	hsa-miR-196b-5p
2453996	ATP6V1C1	hsa-miR-1972
3180688	FOS	hsa-miR-197-5p
60688846	MXD1	hsa-miR-197-5p
4560030	FCAR	hsa-miR-1976
3176134	THBD	hsa-miR-1976
45628236	FOS	hsa-miR-199a-3p
1049640	PLGLB2	hsa-miR-199a-3p
13376116	PRKACB	hsa-miR-199a-3p
16869283	ACN9	hsa-miR-199a-3p
3188733	GBP1	hsa-miR-199a-5p
45628236	FOS	hsa-miR-199b-3p
1049640	PLGLB2	hsa-miR-199b-3p
13376116	PRKACB	hsa-miR-199b-3p
16869283	ACN9	hsa-miR-199b-3p
3188733	GBP1	hsa-miR-199b-5p
1137363	TMEM69	hsa-miR-19a-3p
14573	TXNDC9	hsa-miR-19a-5p
14573	TXNDC9	hsa-miR-19b-1-5p
14573	TXNDC9	hsa-miR-19b-2-5p
1137363	TMEM69	hsa-miR-19b-3p
4648294	PTGS2	hsa-miR-200a-3p
11554162	SGK1	hsa-miR-200a-3p
9131	CXCL2	hsa-miR-200a-5p
1044416	IDH1	hsa-miR-200b-3p
7245349	PMAIP1	hsa-miR-200b-3p
34120135	PMAIP1	hsa-miR-200b-3p
364879	GIN1	hsa-miR-200b-3p
9131	CXCL2	hsa-miR-200b-5p
1044416	IDH1	hsa-miR-200c-3p
7245349	PMAIP1	hsa-miR-200c-3p
34120135	PMAIP1	hsa-miR-200c-3p
35904042	TRIB1	hsa-miR-202-3p
6679100	NEK7	hsa-miR-202-3p
3208602	CTBP2	hsa-miR-202-5p
3208603	CTBP2	hsa-miR-202-5p
1977	BTN3A2	hsa-miR-202-5p
3745574	ZNF559	hsa-miR-202-5p
35339463	RAB10	hsa-miR-203
35073632	ETNK1	hsa-miR-203
11547020	DDIT3	hsa-miR-204-3p
15306	GADD45B	hsa-miR-204-3p
41290898	TP53INP2	hsa-miR-204-3p
3180364	ZC3H12A	hsa-miR-204-3p
6093564	C20orf118	hsa-miR-204-5p
34544682	CYP1B1	hsa-miR-2052
41268579	SNX9	hsa-miR-2052
1071676	IL1B	hsa-miR-2053
1049480	RGS1	hsa-miR-2053
45622835	BTN3A3	hsa-miR-2053
6732	KCTD12	hsa-miR-2053
1048772	GBP1	hsa-miR-205-3p
3188809	GBP1	hsa-miR-205-3p
56157208	OAS2	hsa-miR-205-3p
56369948	OAS2	hsa-miR-205-3p
35058357	C11orf73	hsa-miR-205-3p
11557679	TRIM34	hsa-miR-205-3p
11557679	TRIM6-TRIM34	hsa-miR-205-3p
1043020	PLK2	hsa-miR-2054
7268	HBEGF	hsa-miR-205-5p
10424098	FOSB	hsa-miR-205-5p
7344213	TP53INP2	hsa-miR-205-5p
4734685	ATP6V1C1	hsa-miR-206
61758579	ATP10D	hsa-miR-208a
61758579	ATP10D	hsa-miR-208b
3219149	PARP1	hsa-miR-20a-3p
1548083	NUDCD1	hsa-miR-20a-3p
1042273	GPR183	hsa-miR-20a-5p
1137363	TMEM69	hsa-miR-20a-5p
35498666	KBTBD8	hsa-miR-20b-3p
1042273	GPR183	hsa-miR-20b-5p
1137363	TMEM69	hsa-miR-20b-5p
17131308	PRKACB	hsa-miR-2110
17054823	TMEM69	hsa-miR-2110
3741784	ETNK1	hsa-miR-2110
15202	ATP6V1C1	hsa-miR-2113
41291287	PFKFB3	hsa-miR-211-3p
2149246	BCL2L13	hsa-miR-211-3p
2149247	BCL2L13	hsa-miR-211-3p
6920961	SNX9	hsa-miR-2114-5p
7828	JAG1	hsa-miR-2115-3p
10413148	FCAR	hsa-miR-2115-3p
7818	PCMT1	hsa-miR-2115-3p
1057300	SGK1	hsa-miR-2115-5p
12779059	PPIF	hsa-miR-2115-5p
1894820	SLC2A14	hsa-miR-2115-5p
8679	PARP1	hsa-miR-2116-3p
34893035	OAS1	hsa-miR-2116-3p
11567829	PTGS2	hsa-miR-2116-5p
35388773	CD1D	hsa-miR-2117
17883348	TP53	hsa-miR-2117
1802660	NR4A3	hsa-miR-2117
61200304	CYP1B1	hsa-miR-212-5p
1042692	DUSP4	hsa-miR-212-5p
1042693	DUSP4	hsa-miR-212-5p
2240774	JMJD6	hsa-miR-212-5p
1060243	YPEL5	hsa-miR-21-3p
8512	IER3	hsa-miR-214-3p
1060252	SLC7A5	hsa-miR-215
35520682	HSD17B4	hsa-miR-21-5p
1071676	IL1B	hsa-miR-21-5p
1804141	PDE4B	hsa-miR-21-5p
3182249	ST6GAL1	hsa-miR-21-5p
11554722	ST6GAL1	hsa-miR-21-5p
1978	BTN3A2	hsa-miR-216a
9883767	DTX3L	hsa-miR-216a
1804317	PARP1	hsa-miR-216b
1058227	HIBCH	hsa-miR-216b
1048796	ETNK1	hsa-miR-216b
6822	NDUFA8	hsa-miR-217
1548083	NUDCD1	hsa-miR-217
1724120	DUSP2	hsa-miR-218-1-3p
4648294	PTGS2	hsa-miR-218-1-3p
32613	PLK2	hsa-miR-218-1-3p
2066933	CSF1R	hsa-miR-219-1-3p
2066934	CSF1R	hsa-miR-219-1-3p
1804141	PDE4B	hsa-miR-219-1-3p
1539234	PFKFB3	hsa-miR-219-1-3p
1333718	DPYD	hsa-miR-219-2-3p
3801791	DOCK4	hsa-miR-219-2-3p
14232	BTN3A2	hsa-miR-221-3p
17045718	KBTBD8	hsa-miR-221-3p
14232	BTN3A2	hsa-miR-222-3p
16869283	ACN9	hsa-miR-222-5p
10802501	NLRP3	hsa-miR-223-3p
3188757	GBP1	hsa-miR-223-5p
1126735	PDHB	hsa-miR-223-5p
3177977	OAS1	hsa-miR-224-3p
11540571	PRKAR1A	hsa-miR-224-3p
28730842	PRKAR1A	hsa-miR-224-3p
62063982	XAF1	hsa-miR-224-3p
34078085	C17orf72	hsa-miR-224-5p
2816308	RGS1	hsa-miR-22-5p
9341268	CYP1B1	hsa-miR-2276
35697089	KRCC1	hsa-miR-2276
1064887	PFKFB3	hsa-miR-2278
56040843	ZBTB43	hsa-miR-2278
10784548	LRRK2	hsa-miR-2355-3p
28381252	FOSB	hsa-miR-2355-5p
3740535	CTBP2	hsa-miR-2392
13218591	BTN3A2	hsa-miR-2392
3179769	THBD	hsa-miR-23a-3p
4251923	PLAUR	hsa-miR-23a-5p
3179769	THBD	hsa-miR-23b-3p
4251923	PLAUR	hsa-miR-23b-5p
9131	CXCL2	hsa-miR-23c
3179769	THBD	hsa-miR-23c
6036394	GZF1	hsa-miR-23c
1803022	ACADM	hsa-miR-24-3p
2234687	IFNG	hsa-miR-24-3p
3176927	PDE4B	hsa-miR-24-3p
5744087	TLR8	hsa-miR-2467-3p
1130690	PLGLB2	hsa-miR-25-3p
1130690	PLGLB1	hsa-miR-25-3p
9230	CD83	hsa-miR-2681-3p
3169944	CCL3	hsa-miR-2681-5p
41289178	FPGT	hsa-miR-2681-5p
4560030	FCAR	hsa-miR-2682-3p
1539233	PFKFB3	hsa-miR-2682-3p
3742486	C14orf119	hsa-miR-2682-3p
7601341	FOSL2	hsa-miR-2682-5p
1064893	PFKFB3	hsa-miR-26a-1-3p
1064893	PFKFB3	hsa-miR-26a-2-3p
41314497	MINPP1	hsa-miR-26a-5p
1419008	GZF1	hsa-miR-26a-5p
35388773	CD1D	hsa-miR-26b-3p
1049640	PLGLB2	hsa-miR-26b-3p
11567829	PTGS2	hsa-miR-26b-3p
5029967	TNFAIP3	hsa-miR-26b-3p
32613	PLK2	hsa-miR-26b-3p
41314497	MINPP1	hsa-miR-26b-5p
1419008	GZF1	hsa-miR-26b-5p
45480193	FOS	hsa-miR-27a-3p
1044061	STX7	hsa-miR-27a-3p
1044062	STX7	hsa-miR-27a-3p
34637389	BTN3A2	hsa-miR-27a-3p
17565261	SNX9	hsa-miR-27a-3p
45480193	FOS	hsa-miR-27b-3p
1044062	STX7	hsa-miR-27b-3p
34637389	BTN3A2	hsa-miR-27b-3p
17565261	SNX9	hsa-miR-27b-3p
1071676	IL1B	hsa-miR-27b-5p
56073218	C15orf48	hsa-miR-28-3p
661617	KCTD12	hsa-miR-28-3p
2660	OAS1	hsa-miR-28-5p
4648296	PTGS2	hsa-miR-28-5p
1803173	ATF3	hsa-miR-2861
1804439	PTPN6	hsa-miR-2861
5744087	TLR8	hsa-miR-2861
45616942	OAS2	hsa-miR-296-3p
34566540	SERPINB2	hsa-miR-296-3p
1802016	FPGT	hsa-miR-296-3p
9458905	SNX9	hsa-miR-296-5p
1057098	IFI16	hsa-miR-297
6097	SERPINB2	hsa-miR-298
41291287	PFKFB3	hsa-miR-298
4151634	RB1	hsa-miR-298
1052282	ZC3H12A	hsa-miR-298
1058477	OAS2	hsa-miR-299-3p
14232	BTN3A2	hsa-miR-299-3p
1802263	ZBTB43	hsa-miR-299-3p
1063489	CBX1	hsa-miR-299-5p
1042361	DUSP2	hsa-miR-29a-3p
61746370	GZF1	hsa-miR-29a-5p
1042361	DUSP2	hsa-miR-29b-3p
1042361	DUSP2	hsa-miR-29c-3p
2855658	CYP1B1	hsa-miR-300
1803697	HBEGF	hsa-miR-300
9333352	NFKBIA	hsa-miR-300
1060253	SLC7A5	hsa-miR-301a-3p
1137363	TMEM69	hsa-miR-301a-3p
1060253	SLC7A5	hsa-miR-301b
1137363	TMEM69	hsa-miR-301b
808078	VPS35	hsa-miR-302a-3p
1053393	VPS35	hsa-miR-302a-3p
10171296	LBH	hsa-miR-302a-3p
17045718	KBTBD8	hsa-miR-302a-3p
689469	PTGS2	hsa-miR-302a-5p
4648303	PTGS2	hsa-miR-302a-5p
1052225	ZC3H12A	hsa-miR-302a-5p
1053393	VPS35	hsa-miR-302b-3p
10171296	LBH	hsa-miR-302b-3p
17045718	KBTBD8	hsa-miR-302b-3p
3179876	NR4A2	hsa-miR-302b-5p
8082254	PRKAR1A	hsa-miR-302b-5p
61047121	TRIM5	hsa-miR-302b-5p
1053393	VPS35	hsa-miR-302c-3p
10171296	LBH	hsa-miR-302c-3p
17045718	KBTBD8	hsa-miR-302c-3p
3179876	NR4A2	hsa-miR-302c-5p
41292548	ASF1A	hsa-miR-302c-5p
808078	VPS35	hsa-miR-302d-3p
1053393	VPS35	hsa-miR-302d-3p
10171296	LBH	hsa-miR-302d-3p
17045718	KBTBD8	hsa-miR-302d-3p
3179876	NR4A2	hsa-miR-302d-5p
61047121	TRIM5	hsa-miR-302d-5p
10171296	LBH	hsa-miR-302e
61303135	TRIM5	hsa-miR-302f
61746370	GZF1	hsa-miR-3064-3p
28628780	HSPA1B	hsa-miR-3065-5p
1051897	PTGS2	hsa-miR-3065-5p
1046128	NXT1	hsa-miR-3065-5p
7818	PCMT1	hsa-miR-3074-3p
7106798	TRIM34	hsa-miR-3074-3p
7106798	TRIM6-TRIM34	hsa-miR-3074-3p
3188659	GBP1	hsa-miR-3074-5p
34194442	OAS2	hsa-miR-3074-5p
41291287	PFKFB3	hsa-miR-3074-5p
9341262	CYP1B1	hsa-miR-30a-3p
1048772	GBP1	hsa-miR-30a-3p
3188809	GBP1	hsa-miR-30a-3p
3183620	IFRD1	hsa-miR-30a-3p
3183621	IFRD1	hsa-miR-30a-3p
1071676	IL1B	hsa-miR-30a-3p
34554723	PRKACB	hsa-miR-30a-3p
9309020	CYP1B1	hsa-miR-30a-5p
16857226	B3GNT5	hsa-miR-30a-5p
1159227	ATP6V1C1	hsa-miR-30b-3p
1136646	CDKN1A	hsa-miR-30b-3p
2066933	CSF1R	hsa-miR-30b-3p
2066934	CSF1R	hsa-miR-30b-3p
1042526	TP53	hsa-miR-30b-3p
41282151	RNF20	hsa-miR-30b-3p
9309020	CYP1B1	hsa-miR-30b-5p
16857226	B3GNT5	hsa-miR-30b-5p
11571553	ATF3	hsa-miR-30c-1-3p
3170167	FOSB	hsa-miR-30c-1-3p
28381258	FOSB	hsa-miR-30c-1-3p
56078692	OAS2	hsa-miR-30c-1-3p
1046353	CDK2AP2	hsa-miR-30c-1-3p
7353935	GZF1	hsa-miR-30c-1-3p
11571553	ATF3	hsa-miR-30c-2-3p
35007750	CYP1B1	hsa-miR-30c-2-3p
28381258	FOSB	hsa-miR-30c-2-3p
56078692	OAS2	hsa-miR-30c-2-3p
1046353	CDK2AP2	hsa-miR-30c-2-3p
7353935	GZF1	hsa-miR-30c-2-3p
9309020	CYP1B1	hsa-miR-30c-5p
16857226	B3GNT5	hsa-miR-30c-5p
9341262	CYP1B1	hsa-miR-30d-3p
1048772	GBP1	hsa-miR-30d-3p
3188809	GBP1	hsa-miR-30d-3p
3183621	IFRD1	hsa-miR-30d-3p
1071676	IL1B	hsa-miR-30d-3p
34554723	PRKACB	hsa-miR-30d-3p
9309020	CYP1B1	hsa-miR-30d-5p
16857226	B3GNT5	hsa-miR-30d-5p
9341262	CYP1B1	hsa-miR-30e-3p
1048772	GBP1	hsa-miR-30e-3p
3188809	GBP1	hsa-miR-30e-3p
3183620	IFRD1	hsa-miR-30e-3p
3183621	IFRD1	hsa-miR-30e-3p
34554723	PRKACB	hsa-miR-30e-3p
17146787	DBF4	hsa-miR-30e-3p
9309020	CYP1B1	hsa-miR-30e-5p
16857226	B3GNT5	hsa-miR-30e-5p
1049723	RB1	hsa-miR-3117-3p
6141507	TP53INP2	hsa-miR-3117-3p
17575347	CREM	hsa-miR-3117-5p
3826598	PMAIP1	hsa-miR-3118
41282644	VEGFA	hsa-miR-3118
15202	ATP6V1C1	hsa-miR-3119
12661	TNFAIP3	hsa-miR-3120-3p
1051148	SLC35A1	hsa-miR-3120-3p
3801792	DOCK4	hsa-miR-3120-5p
5008	ADM	hsa-miR-3121-3p
2057482	HIF1A	hsa-miR-3121-3p
7245349	PMAIP1	hsa-miR-3121-3p
41366349	THBS1	hsa-miR-3121-3p
1803473	SLC35A1	hsa-miR-3121-3p
3741784	ETNK1	hsa-miR-3121-3p
1048608	EAF1	hsa-miR-3121-3p
3208605	CTBP2	hsa-miR-3121-5p
8904	NFKBIA	hsa-miR-3121-5p
28382128	TAF4	hsa-miR-3121-5p
3199147	CTBP2	hsa-miR-3122
59396124	TP53INP2	hsa-miR-3122
1058227	HIBCH	hsa-miR-3123
16870033	ATP6V1C1	hsa-miR-3124-3p
9341268	CYP1B1	hsa-miR-3124-3p
2725124	ST8SIA4	hsa-miR-3124-3p
6977687	DBF4	hsa-miR-3124-3p
7248	GABARAPL1	hsa-miR-3124-3p
9925	PRKAR1A	hsa-miR-3125
61672126	FCAR	hsa-miR-3126-3p
28381257	FOSB	hsa-miR-3126-3p
41292548	ASF1A	hsa-miR-3126-3p
4150240	HBEGF	hsa-miR-3126-5p
56858247	EREG	hsa-miR-3127-3p
7354	GADD45B	hsa-miR-3127-3p
14384	GADD45B	hsa-miR-3127-3p
3783503	GADD45B	hsa-miR-3127-3p
14232	BTN3A2	hsa-miR-3127-5p
3180364	ZC3H12A	hsa-miR-3127-5p
41292548	ASF1A	hsa-miR-3128
5741889	TLR8	hsa-miR-3129-3p
1548082	NUDCD1	hsa-miR-3129-3p
45628236	FOS	hsa-miR-3129-5p
1049640	PLGLB2	hsa-miR-3129-5p
13376116	PRKACB	hsa-miR-3129-5p
16869283	ACN9	hsa-miR-3129-5p
32613	PLK2	hsa-miR-3130-5p
5744087	TLR8	hsa-miR-3130-5p
6087620	TP53INP2	hsa-miR-3130-5p
58414332	GAPT	hsa-miR-3130-5p
3180688	FOS	hsa-miR-3132
60688846	MXD1	hsa-miR-3132
689467	PTGS2	hsa-miR-3133
4150237	HBEGF	hsa-miR-3136-3p
3853839	TLR7	hsa-miR-3136-3p
3170940	ZC3H12A	hsa-miR-3136-3p
3826598	PMAIP1	hsa-miR-3136-5p
1064899	PFKFB3	hsa-miR-3137
1064900	PFKFB3	hsa-miR-3137
1548082	NUDCD1	hsa-miR-3137
956	FPGT	hsa-miR-3138
41289178	FPGT	hsa-miR-3138
1061422	ZNF331	hsa-miR-3138
15202	ATP6V1C1	hsa-miR-3140-3p
9835495	EAF1	hsa-miR-3143
12803	NR4A2	hsa-miR-3144-3p
1803606	FOSB	hsa-miR-3144-5p
8438	CBX1	hsa-miR-3145-3p
9435	ETNK1	hsa-miR-3145-3p
1802570	CDKN1A	hsa-miR-3145-5p
730214	SLC7A5	hsa-miR-3147
1126889	TNFRSF17	hsa-miR-3148
3208579	CTBP2	hsa-miR-3148
7435426	EREG	hsa-miR-3148
1064889	PFKFB3	hsa-miR-3148
34358618	PRKAR1A	hsa-miR-3148
3853839	TLR7	hsa-miR-3148
11557679	TRIM34	hsa-miR-3148
33936237	HIATL1	hsa-miR-3148
11557679	TRIM6-TRIM34	hsa-miR-3148
41268581	SNX9	hsa-miR-3149
3170167	FOSB	hsa-miR-3150a-3p
6935678	BTN3A2	hsa-miR-3150a-3p
6679100	NEK7	hsa-miR-3150a-3p
1064756	PRKAR1A	hsa-miR-3150b-3p
34600329	OAS2	hsa-miR-3151
45505991	OAS2	hsa-miR-3151
1052282	ZC3H12A	hsa-miR-3151
3177977	OAS1	hsa-miR-3152-3p
3750665	PFKFB3	hsa-miR-3152-5p
1131579	TNFSF10	hsa-miR-3152-5p
11547020	DDIT3	hsa-miR-3153
1042273	GPR183	hsa-miR-3153
1065526	PLGLB2	hsa-miR-3153
1065526	PLGLB1	hsa-miR-3153
41301212	PRKACB	hsa-miR-3154
1042642	ST6GAL1	hsa-miR-3155a
13306851	THBD	hsa-miR-3155a
13306852	THBD	hsa-miR-3155a
41328344	THBD	hsa-miR-3155a
1042642	ST6GAL1	hsa-miR-3155b
13306851	THBD	hsa-miR-3155b
13306852	THBD	hsa-miR-3155b
41328344	THBD	hsa-miR-3155b
12500	CSF1R	hsa-miR-3156-3p
15175	CLK1	hsa-miR-3156-5p
1062755	STX7	hsa-miR-3156-5p
7601341	FOSL2	hsa-miR-3157-3p
7344244	TP53INP2	hsa-miR-3158-3p
56094735	THBS1	hsa-miR-3158-5p
4806293	ZNF146	hsa-miR-3159
3829148	PFKFB3	hsa-miR-31-5p
36102318	PFKFB3	hsa-miR-31-5p
55643411	PFKFB3	hsa-miR-31-5p
2240773	JMJD6	hsa-miR-3160-3p
4150238	HBEGF	hsa-miR-3160-5p
3208919	ACSL1	hsa-miR-3160-5p
4141180	C17orf72	hsa-miR-3161
1064892	PFKFB3	hsa-miR-3162-3p
3093283	FGL2	hsa-miR-3162-3p
35579124	MAP3K8	hsa-miR-3163
3867457	CTBP2	hsa-miR-3163
3867458	CTBP2	hsa-miR-3163
34964253	SERPINB2	hsa-miR-3163
1126722	PDHB	hsa-miR-3163
17131308	PRKACB	hsa-miR-3163
28730842	PRKAR1A	hsa-miR-3163
1042618	PTGER2	hsa-miR-3163
13306032	PTGS2	hsa-miR-3163
58791443	RANBP2	hsa-miR-3163
41366349	THBS1	hsa-miR-3163
34202355	ZFP36	hsa-miR-3163
16900627	RIPK2	hsa-miR-3163
1133071	DDX58	hsa-miR-3163
3188744	GBP1	hsa-miR-3164
12475412	MXD1	hsa-miR-3164
1054519	MARS	hsa-miR-3164
56745384	EREG	hsa-miR-3167
3208579	CTBP2	hsa-miR-3168
1042481	DPYD	hsa-miR-3168
6060004	TP53INP2	hsa-miR-3169
1058477	OAS2	hsa-miR-3170
4821766	MAFF	hsa-miR-3170
3802065	SAMD9	hsa-miR-3170
10052625	CARD6	hsa-miR-3170
13218591	BTN3A2	hsa-miR-3173-3p
1803605	FOSB	hsa-miR-3173-5p
35993958	TP53	hsa-miR-3173-5p
2151562	DPYD	hsa-miR-3174
4150239	HBEGF	hsa-miR-3175
1049739	FOSB	hsa-miR-3175
1064891	PFKFB3	hsa-miR-3175
1064756	PRKAR1A	hsa-miR-3175
1046363	CDK2AP2	hsa-miR-3175
41282153	RNF20	hsa-miR-3175
3783505	GADD45B	hsa-miR-3176
3210238	EAF1	hsa-miR-3176
56285713	C17orf72	hsa-miR-3177-3p
1042482	DPYD	hsa-miR-3179
41430645	VEGFA	hsa-miR-3179
1058740	PPIF	hsa-miR-3180-5p
596408	ETNK1	hsa-miR-3180-5p
1802660	NR4A3	hsa-miR-3182
11554721	ST6GAL1	hsa-miR-3183
11465458	HBEGF	hsa-miR-3184-3p
1804276	RB1	hsa-miR-3184-3p
1803662	ZFP36	hsa-miR-3184-5p
6088587	TP53INP2	hsa-miR-3184-5p
1064888	PFKFB3	hsa-miR-3185
1049698	FOSB	hsa-miR-3187-5p
1159227	ATP6V1C1	hsa-miR-3189-3p
3182249	ST6GAL1	hsa-miR-3190-3p
1046607	PPIL1	hsa-miR-3190-3p
61672126	FCAR	hsa-miR-3190-5p
62123425	FCAR	hsa-miR-3190-5p
28381257	FOSB	hsa-miR-3190-5p
34210833	TRIM6	hsa-miR-3190-5p
10566169	DDIT4	hsa-miR-3191-5p
1804640	PLK3	hsa-miR-3192
2687	PLAUR	hsa-miR-3192
41282151	RNF20	hsa-miR-3192
16986361	C20orf118	hsa-miR-3193
28551159	BTN3A2	hsa-miR-3194-3p
3176357	CDKN1A	hsa-miR-3197
3208617	CTBP2	hsa-miR-3197
3208618	CTBP2	hsa-miR-3197
10754558	NLRP3	hsa-miR-3197
3208580	CTBP2	hsa-miR-3199
9648	C17orf62	hsa-miR-3199
15306	GADD45B	hsa-miR-3202
4251923	PLAUR	hsa-miR-3202
41430645	VEGFA	hsa-miR-3202
1050289	OLR1	hsa-miR-320a
1050289	OLR1	hsa-miR-320b
1050289	OLR1	hsa-miR-320c
1050289	OLR1	hsa-miR-320d
34893035	OAS1	hsa-miR-323a-3p
4655837	PDE4B	hsa-miR-323a-3p
2289046	IRS2	hsa-miR-323b-3p
1049199	CCL3	hsa-miR-323b-5p
1049200	CCL3	hsa-miR-323b-5p
3210166	CCL3	hsa-miR-323b-5p
17879353	TP53	hsa-miR-323b-5p
1048797	ETNK1	hsa-miR-32-3p
16925301	ETNK1	hsa-miR-32-3p
17491821	LRRK2	hsa-miR-32-3p
2059040	STARD4	hsa-miR-32-3p
1062820	TP53INP2	hsa-miR-324-5p
55912516	GABARAPL1	hsa-miR-325
1130690	PLGLB2	hsa-miR-32-5p
1130690	PLGLB1	hsa-miR-32-5p
3180365	ZC3H12A	hsa-miR-326
1724120	DUSP2	hsa-miR-329
35924181	EAF1	hsa-miR-329
34882982	PRKACB	hsa-miR-330-3p
12661	TNFAIP3	hsa-miR-330-3p
5029967	TNFAIP3	hsa-miR-330-3p
17146787	DBF4	hsa-miR-330-3p
7353935	GZF1	hsa-miR-330-5p
3180365	ZC3H12A	hsa-miR-330-5p
11540601	PCMT1	hsa-miR-335-3p
17883348	TP53	hsa-miR-335-3p
34161035	GIMAP4	hsa-miR-335-3p
10059556	CARD6	hsa-miR-335-3p
17491828	LRRK2	hsa-miR-335-3p
1048819	GBP1	hsa-miR-335-5p
698365	TMED7	hsa-miR-335-5p
11210432	FPGT	hsa-miR-338-3p
1062820	TP53INP2	hsa-miR-338-3p
1017732	EREG	hsa-miR-338-5p
28381252	FOSB	hsa-miR-339-5p
35438708	DTX3L	hsa-miR-339-5p
9341265	CYP1B1	hsa-miR-33a-3p
56073218	C15orf48	hsa-miR-33a-3p
12317915	ETNK1	hsa-miR-33b-3p
1803605	FOSB	hsa-miR-342-3p
33955254	ZBTB10	hsa-miR-345-3p
5029967	TNFAIP3	hsa-miR-345-5p
11554721	ST6GAL1	hsa-miR-346
2655	JUN	hsa-miR-34a-3p
34611923	CARD6	hsa-miR-34b-3p
7601341	FOSL2	hsa-miR-34b-5p
28628780	HSPA1B	hsa-miR-3529-3p
1051529	PRKACB	hsa-miR-3529-3p
34222187	NLRP3	hsa-miR-3529-3p
3188701	GBP1	hsa-miR-3545-3p
10434	VEGFA	hsa-miR-3545-5p
11002941	PPIF	hsa-miR-3591-5p
13218591	BTN3A2	hsa-miR-3605-5p
1048797	ETNK1	hsa-miR-3606
5743786	TLR7	hsa-miR-3607-3p
6036394	GZF1	hsa-miR-3607-3p
1054519	MARS	hsa-miR-3609
11567829	PTGS2	hsa-miR-3609
5744178	TLR5	hsa-miR-3609
62087489	PRKAR1A	hsa-miR-3610
5006	ADM	hsa-miR-3612
1064756	PRKAR1A	hsa-miR-3612
41527948	THBS1	hsa-miR-3612
17884586	TP53	hsa-miR-3612
9341258	CYP1B1	hsa-miR-3613-3p
3199902	ETV3	hsa-miR-3613-3p
3188857	GBP1	hsa-miR-3613-3p
3188860	GBP1	hsa-miR-3613-3p
41270537	HSPA1B	hsa-miR-3613-3p
1131745	THBS1	hsa-miR-3613-3p
36001252	VEGFA	hsa-miR-3613-3p
14860	ZFP36	hsa-miR-3613-3p
3093282	FGL2	hsa-miR-3613-3p
3093283	FGL2	hsa-miR-3613-3p
3215279	DUSP10	hsa-miR-3613-3p
3217059	JMJD6	hsa-miR-3613-3p
1046125	NXT1	hsa-miR-3613-3p
1046128	NXT1	hsa-miR-3613-3p
11539545	SAMD9	hsa-miR-3613-3p
9341262	CYP1B1	hsa-miR-3613-5p
9230	CD83	hsa-miR-3613-5p
3829148	PFKFB3	hsa-miR-361-3p
55643411	PFKFB3	hsa-miR-361-3p
35932603	PTGER2	hsa-miR-361-3p
45460603	PTGER2	hsa-miR-361-3p
9458905	SNX9	hsa-miR-361-3p
6060005	TP53INP2	hsa-miR-361-3p
11571554	ATF3	hsa-miR-3614-3p
9379871	BTN3A2	hsa-miR-3614-3p
35978993	CYP1B1	hsa-miR-3614-5p
6977687	DBF4	hsa-miR-3614-5p
17882252	TP53	hsa-miR-3615
1802172	IER3	hsa-miR-3615
9558	LBH	hsa-miR-3615
1059366	DUSP6	hsa-miR-361-5p
11914287	EAF1	hsa-miR-3616-3p
27026	CTBP2	hsa-miR-3616-5p
34486624	TP53	hsa-miR-3616-5p
1064954	ZNF331	hsa-miR-3616-5p
11551614	TP53INP2	hsa-miR-3616-5p
35555206	OLR1	hsa-miR-3617
17094935	FPGT	hsa-miR-3617
3188874	GBP1	hsa-miR-3618
7705	KCTD12	hsa-miR-3618
7268	HBEGF	hsa-miR-3619-3p
8512	IER3	hsa-miR-3619-5p
11544353	MAFF	hsa-miR-3619-5p
45595436	C20orf118	hsa-miR-3619-5p
5007	ADM	hsa-miR-3622a-3p
45507596	OAS1	hsa-miR-3622a-3p
61746370	GZF1	hsa-miR-3622a-3p
5007	ADM	hsa-miR-3622b-3p
45507596	OAS1	hsa-miR-3622b-3p
8110350	ZNF331	hsa-miR-3622b-3p
61746370	GZF1	hsa-miR-3622b-3p
1724120	DUSP2	hsa-miR-362-3p
1044060	STX7	hsa-miR-362-3p
35924181	EAF1	hsa-miR-362-3p
56123348	DBF4	hsa-miR-362-5p
1130690	PLGLB2	hsa-miR-363-3p
1130690	PLGLB1	hsa-miR-363-3p
1064890	PFKFB3	hsa-miR-363-5p
1539232	PFKFB3	hsa-miR-363-5p
3750665	PFKFB3	hsa-miR-363-5p
34354934	OAS1	hsa-miR-3646
1050289	OLR1	hsa-miR-3646
41301204	PRKACB	hsa-miR-3646
4648295	PTGS2	hsa-miR-3646
1803606	FOSB	hsa-miR-3649
1057098	IFI16	hsa-miR-3650
56858247	EREG	hsa-miR-3651
11551614	TP53INP2	hsa-miR-3652
1804276	RB1	hsa-miR-3653
11551615	TP53INP2	hsa-miR-3653
1056876	CYP1B1	hsa-miR-3657
3188717	GBP1	hsa-miR-3657
1803484	DCK	hsa-miR-3658
1804276	RB1	hsa-miR-3658
1053922	TICAM2	hsa-miR-3658
1053922	TMED7-TICAM2	hsa-miR-3658
7240310	PMAIP1	hsa-miR-365a-3p
7240310	PMAIP1	hsa-miR-365b-3p
56285713	C17orf72	hsa-miR-3660
16845677	DCK	hsa-miR-3662
34354934	OAS1	hsa-miR-3662
1050289	OLR1	hsa-miR-3662
5275	PTGS2	hsa-miR-3662
61303135	TRIM5	hsa-miR-3662
7765016	ASF1A	hsa-miR-3663-5p
45465198	C14orf119	hsa-miR-3664-3p
6060004	TP53INP2	hsa-miR-3664-3p
1058920	CSF1R	hsa-miR-3664-5p
11567829	PTGS2	hsa-miR-3664-5p
9365617	SNX9	hsa-miR-3664-5p
61876273	NRIP3	hsa-miR-3664-5p
41527948	THBS1	hsa-miR-3665
1060254	SLC7A5	hsa-miR-3666
1137363	TMEM69	hsa-miR-3666
1131340	NR4A3	hsa-miR-3667-3p
1473683	G0S2	hsa-miR-3667-3p
9458905	SNX9	hsa-miR-3667-3p
45547731	GZF1	hsa-miR-3670
1042274	IFNG	hsa-miR-3671
41301194	PRKACB	hsa-miR-3671
1050650	CD83	hsa-miR-3671
3204901	SBDS	hsa-miR-3671
61876273	NRIP3	hsa-miR-3672
2059041	STARD4	hsa-miR-3672
4734684	ATP6V1C1	hsa-miR-3673
1130690	PLGLB2	hsa-miR-367-3p
1130690	PLGLB1	hsa-miR-367-3p
4821766	MAFF	hsa-miR-3674
4625635	C14orf119	hsa-miR-3674
17045726	KBTBD8	hsa-miR-3674
571848	FPGT	hsa-miR-3675-3p
1058227	HIBCH	hsa-miR-3675-3p
1064757	PRKAR1A	hsa-miR-3677-5p
56094735	THBS1	hsa-miR-3678-3p
9393721	BTN3A3	hsa-miR-3678-3p
9846247	EAF1	hsa-miR-3678-3p
13306033	PTGS2	hsa-miR-3678-5p
8007589	C14orf119	hsa-miR-3679-3p
55671274	OAS2	hsa-miR-3679-5p
1801380	ST6GAL1	hsa-miR-3679-5p
1491980	P2RY13	hsa-miR-3679-5p
12312458	ETNK1	hsa-miR-3679-5p
3208624	CTBP2	hsa-miR-3680-3p
3208625	CTBP2	hsa-miR-3680-3p
8080739	PRKAR1A	hsa-miR-3680-3p
4151631	RB1	hsa-miR-3680-3p
1053589	SBDS	hsa-miR-3680-3p
1131340	NR4A3	hsa-miR-3680-5p
34637389	BTN3A2	hsa-miR-3681-3p
8110538	ZNF331	hsa-miR-3681-5p
162562	CYP1B1	hsa-miR-3682-5p
41301206	PRKACB	hsa-miR-3682-5p
56094735	THBS1	hsa-miR-3682-5p
41289178	FPGT	hsa-miR-3682-5p
35007750	CYP1B1	hsa-miR-3685
2059041	STARD4	hsa-miR-3685
7988	GZF1	hsa-miR-3686
6036394	GZF1	hsa-miR-3686
1133071	DDX58	hsa-miR-3688-3p
34490156	YPEL5	hsa-miR-3688-3p
62145230	PLGLB2	hsa-miR-3688-5p
1136646	CDKN1A	hsa-miR-3689a-3p
2066933	CSF1R	hsa-miR-3689a-3p
2066934	CSF1R	hsa-miR-3689a-3p
41527948	THBS1	hsa-miR-3689a-3p
1042526	TP53	hsa-miR-3689a-3p
36082945	MXD1	hsa-miR-3689a-5p
36051049	OLR1	hsa-miR-3689a-5p
11544853	UGDH	hsa-miR-3689a-5p
1136646	CDKN1A	hsa-miR-3689b-3p
2066933	CSF1R	hsa-miR-3689b-3p
2066934	CSF1R	hsa-miR-3689b-3p
41527948	THBS1	hsa-miR-3689b-3p
1042526	TP53	hsa-miR-3689b-3p
36082945	MXD1	hsa-miR-3689b-5p
36051049	OLR1	hsa-miR-3689b-5p
11544853	UGDH	hsa-miR-3689b-5p
1136646	CDKN1A	hsa-miR-3689c
2066933	CSF1R	hsa-miR-3689c
2066934	CSF1R	hsa-miR-3689c
41527948	THBS1	hsa-miR-3689c
1042526	TP53	hsa-miR-3689c
9972278	C14orf119	hsa-miR-3689d
36082945	MXD1	hsa-miR-3689e
36051049	OLR1	hsa-miR-3689e
11544853	UGDH	hsa-miR-3689e
36082945	MXD1	hsa-miR-3689f
36051049	OLR1	hsa-miR-3689f
11544853	UGDH	hsa-miR-3689f
13306851	THBD	hsa-miR-3690
13306852	THBD	hsa-miR-3690
17455449	SNX9	hsa-miR-3690
35550891	GIMAP8	hsa-miR-3690
616790	PRKACB	hsa-miR-3691-3p
4141180	C17orf72	hsa-miR-3691-5p
16979666	ZNF559	hsa-miR-3692-3p
1894820	SLC2A14	hsa-miR-3692-3p
15306	GADD45B	hsa-miR-3692-5p
1046363	CDK2AP2	hsa-miR-3692-5p
9341261	CYP1B1	hsa-miR-369-3p
1050283	OLR1	hsa-miR-369-3p
1044364	IRS2	hsa-miR-369-3p
35339463	RAB10	hsa-miR-369-3p
1803173	ATF3	hsa-miR-370
1046363	CDK2AP2	hsa-miR-370
41271295	CD83	hsa-miR-3713
2654	JUN	hsa-miR-3714
17054823	TMEM69	hsa-miR-3714
13535	ZNF559	hsa-miR-3714
1064899	PFKFB3	hsa-miR-371a-5p
3210238	EAF1	hsa-miR-371a-5p
1042273	GPR183	hsa-miR-371b-3p
9341258	CYP1B1	hsa-miR-371b-5p
58779789	EEA1	hsa-miR-371b-5p
11914325	EAF1	hsa-miR-371b-5p
3093280	FGL2	hsa-miR-372
808078	VPS35	hsa-miR-372
1053393	VPS35	hsa-miR-372
10171296	LBH	hsa-miR-372
17045718	KBTBD8	hsa-miR-372
808078	VPS35	hsa-miR-373-3p
1053393	VPS35	hsa-miR-373-3p
10171296	LBH	hsa-miR-373-3p
17045718	KBTBD8	hsa-miR-373-3p
7435426	EREG	hsa-miR-373-5p
11914325	EAF1	hsa-miR-373-5p
1642789	TP53	hsa-miR-374a-3p
61758580	ATP10D	hsa-miR-374a-3p
10744	DUSP6	hsa-miR-374a-5p
1063237	MAFF	hsa-miR-374a-5p
10744	DUSP6	hsa-miR-374b-5p
35339463	RAB10	hsa-miR-374b-5p
1063237	MAFF	hsa-miR-374b-5p
27026	CTBP2	hsa-miR-374c-5p
1058498	CTBP2	hsa-miR-374c-5p
4648299	PTGS2	hsa-miR-374c-5p
5741889	TLR8	hsa-miR-374c-5p
62152022	MXD1	hsa-miR-376a-3p
35781052	PFKFB3	hsa-miR-376a-3p
9379871	BTN3A2	hsa-miR-376a-5p
661617	KCTD12	hsa-miR-376a-5p
62152022	MXD1	hsa-miR-376b
35781052	PFKFB3	hsa-miR-376b
3188893	GBP1	hsa-miR-377-3p
11550719	TMED7	hsa-miR-377-3p
8763	ACADM	hsa-miR-377-5p
1159227	ATP6V1C1	hsa-miR-377-5p
4251924	PLAUR	hsa-miR-377-5p
17879353	TP53	hsa-miR-377-5p
35686785	DCK	hsa-miR-378a-3p
6060004	TP53INP2	hsa-miR-378a-3p
35686785	DCK	hsa-miR-378b
6060004	TP53INP2	hsa-miR-378b
35686785	DCK	hsa-miR-378c
6060004	TP53INP2	hsa-miR-378c
35686785	DCK	hsa-miR-378d
6060004	TP53INP2	hsa-miR-378d
35686785	DCK	hsa-miR-378e
6060004	TP53INP2	hsa-miR-378e
35686785	DCK	hsa-miR-378f
1053589	SBDS	hsa-miR-378f
6060004	TP53INP2	hsa-miR-378f
1804439	PTPN6	hsa-miR-378g
59775513	XAF1	hsa-miR-378g
35686785	DCK	hsa-miR-378h
35339463	RAB10	hsa-miR-378h
6060004	TP53INP2	hsa-miR-378h
35686785	DCK	hsa-miR-378i
6060004	TP53INP2	hsa-miR-378i
3867460	CTBP2	hsa-miR-379-3p
34513310	CREM	hsa-miR-380-3p
59396124	TP53INP2	hsa-miR-380-3p
34329725	CYP1B1	hsa-miR-380-5p
2855658	CYP1B1	hsa-miR-381
1803697	HBEGF	hsa-miR-381
9333352	NFKBIA	hsa-miR-381
16857225	B3GNT5	hsa-miR-382-3p
11552591	PRKACB	hsa-miR-382-5p
1048848	GBP1	hsa-miR-384
13376116	PRKACB	hsa-miR-384
41544618	RPA2	hsa-miR-384
11282	THBS1	hsa-miR-384
1131340	NR4A3	hsa-miR-384
2240774	JMJD6	hsa-miR-384
12449410	XAF1	hsa-miR-3907
55658726	HIATL1	hsa-miR-3907
55686751	HIATL1	hsa-miR-3907
4151634	RB1	hsa-miR-3908
16857226	B3GNT5	hsa-miR-3908
1053594	SBDS	hsa-miR-3910
3183620	IFRD1	hsa-miR-3911
3183621	IFRD1	hsa-miR-3911
11541590	PFKFB3	hsa-miR-3911
730214	SLC7A5	hsa-miR-3911
62150255	RGPD4	hsa-miR-3911
62150255	RGPD3	hsa-miR-3911
59396124	TP53INP2	hsa-miR-3913-5p
9925	PRKAR1A	hsa-miR-3916
7120093	TRIM6	hsa-miR-3916
9846247	EAF1	hsa-miR-3919
3210095	GTF3A	hsa-miR-3921
4686848	ST6GAL1	hsa-miR-3921
3783505	GADD45B	hsa-miR-3922-3p
35054573	GADD45B	hsa-miR-3922-3p
3210238	EAF1	hsa-miR-3922-3p
55912516	GABARAPL1	hsa-miR-3923
13124290	DCK	hsa-miR-3924
1017732	EREG	hsa-miR-3924
1057098	IFI16	hsa-miR-3924
9875079	ST6GAL1	hsa-miR-3924
1054187	DOCK4	hsa-miR-3924
1054188	DOCK4	hsa-miR-3924
1894820	SLC2A14	hsa-miR-3924
12490075	DTX3L	hsa-miR-3925-3p
56745384	EREG	hsa-miR-3929
11376390	PMAIP1	hsa-miR-3929
59218593	TRIM5	hsa-miR-3929
4678198	DTX3L	hsa-miR-3929
2453996	ATP6V1C1	hsa-miR-3934
8086	ACSL1	hsa-miR-3934
3219148	PARP1	hsa-miR-3936
28381258	FOSB	hsa-miR-3936
2132862	ATP6V1C1	hsa-miR-3937
9450722	SLC35A1	hsa-miR-3941
35924181	EAF1	hsa-miR-3941
3208619	CTBP2	hsa-miR-3942-3p
41301208	PRKACB	hsa-miR-3942-3p
11567830	PTGS2	hsa-miR-3942-3p
41302802	ATG4C	hsa-miR-3942-3p
13311	OAS2	hsa-miR-3942-5p
34882982	PRKACB	hsa-miR-3942-5p
11554722	ST6GAL1	hsa-miR-3942-5p
12317915	ETNK1	hsa-miR-3942-5p
10878441	LRRK2	hsa-miR-3942-5p
3829148	PFKFB3	hsa-miR-3943
13857	ST8SIA4	hsa-miR-3944-5p
11541872	PHLDA1	hsa-miR-3972
17225053	MSH2	hsa-miR-3973
6847	CBX1	hsa-miR-3973
17146789	DBF4	hsa-miR-3974
7963767	MAT2A	hsa-miR-3975
41366349	THBS1	hsa-miR-3976
2149246	BCL2L13	hsa-miR-3976
2672	CYP1B1	hsa-miR-3977
62152022	MXD1	hsa-miR-3977
1802613	PLAUR	hsa-miR-3977
34514963	ZNF146	hsa-miR-3977
6142229	TP53INP2	hsa-miR-3977
1059356	C14orf119	hsa-miR-409-3p
952827	GIMAP8	hsa-miR-409-3p
162562	CYP1B1	hsa-miR-409-5p
1058507	CTBP2	hsa-miR-411-3p
3867460	CTBP2	hsa-miR-411-3p
8086	ACSL1	hsa-miR-411-5p
8316	DDIT4	hsa-miR-412
3205007	TUBB2A	hsa-miR-421
61758578	ATP10D	hsa-miR-421
45595436	C20orf118	hsa-miR-421
35686785	DCK	hsa-miR-422a
6060004	TP53INP2	hsa-miR-422a
61735070	FCAR	hsa-miR-423-3p
1803662	ZFP36	hsa-miR-423-5p
6088587	TP53INP2	hsa-miR-423-5p
6097	SERPINB2	hsa-miR-424-5p
10361	GIMAP5	hsa-miR-424-5p
10361	GIMAP1-GIMAP5	hsa-miR-424-5p
59218593	TRIM5	hsa-miR-4251
12490075	DTX3L	hsa-miR-4252
34698509	DTX3L	hsa-miR-4252
17009176	YPEL5	hsa-miR-4253
577	SNX9	hsa-miR-425-3p
1803900	ACSL1	hsa-miR-4254
8679	PARP1	hsa-miR-4255
27026	CTBP2	hsa-miR-4255
1044068	STX7	hsa-miR-4255
11545325	CREM	hsa-miR-425-5p
3203635	EEA1	hsa-miR-4257
1043259	RAB10	hsa-miR-4257
3174607	OSBPL11	hsa-miR-4257
4141180	C17orf72	hsa-miR-4259
58665242	PMAIP1	hsa-miR-4262
28382129	TAF4	hsa-miR-4262
3803332	C15orf48	hsa-miR-4262
1365770	LRRK2	hsa-miR-4262
14232	BTN3A2	hsa-miR-4265
34773212	BTN3A2	hsa-miR-4265
10744	DUSP6	hsa-miR-4267
61735070	FCAR	hsa-miR-4267
41266833	BTN3A2	hsa-miR-4268
916132	TP53	hsa-miR-4269
4150239	HBEGF	hsa-miR-4270
34760279	MXD1	hsa-miR-4270
1044061	STX7	hsa-miR-4270
34035103	RAB10	hsa-miR-4270
35550891	GIMAP8	hsa-miR-4270
55703732	OAS2	hsa-miR-4271
17883348	TP53	hsa-miR-4273
1802660	NR4A3	hsa-miR-4273
15459	BTG3	hsa-miR-4273
1060300	YPEL5	hsa-miR-4273
1803899	ACSL1	hsa-miR-4275
36051049	OLR1	hsa-miR-4276
1050592	CX3CR1	hsa-miR-4277
6088587	TP53INP2	hsa-miR-4278
28943595	HSD17B4	hsa-miR-4280
11544353	MAFF	hsa-miR-4281
34169771	CYP1B1	hsa-miR-4282
11552592	PRKACB	hsa-miR-4282
3134589	PTGS2	hsa-miR-4282
3134590	PTGS2	hsa-miR-4282
3176122	THBD	hsa-miR-4282
3801792	DOCK4	hsa-miR-4282
698365	TMED7	hsa-miR-4282
1962685	EREG	hsa-miR-4284
35812684	XAF1	hsa-miR-4284
1059247	CDKN1A	hsa-miR-4286
7120209	TRIM6	hsa-miR-4286
1041978	PMAIP1	hsa-miR-4287
36107658	ARFIP1	hsa-miR-4287
1473683	G0S2	hsa-miR-4287
6093564	C20orf118	hsa-miR-4287
12425514	OAS2	hsa-miR-4288
3801792	DOCK4	hsa-miR-4288
11930255	ATP10D	hsa-miR-4288
1136646	CDKN1A	hsa-miR-4289
3188757	GBP1	hsa-miR-4289
3188764	GBP1	hsa-miR-4289
1044416	IDH1	hsa-miR-429
7245349	PMAIP1	hsa-miR-429
35964378	GABARAPL1	hsa-miR-4292
8316	DDIT4	hsa-miR-4292
1053922	TICAM2	hsa-miR-4293
1053922	TMED7-TICAM2	hsa-miR-4293
2233169	MINPP1	hsa-miR-4294
1060253	SLC7A5	hsa-miR-4295
1060254	SLC7A5	hsa-miR-4295
1137363	TMEM69	hsa-miR-4295
14232	BTN3A2	hsa-miR-4296
708905	FOSB	hsa-miR-4297
28551159	BTN3A2	hsa-miR-4297
3199147	CTBP2	hsa-miR-4298
1050648	CD83	hsa-miR-4298
61254141	ATP6V1C1	hsa-miR-4299
1044065	STX7	hsa-miR-4299
12214031	BTN3A2	hsa-miR-4299
1804640	PLK3	hsa-miR-4300
7120209	TRIM6	hsa-miR-4301
3183620	IFRD1	hsa-miR-4302
3183621	IFRD1	hsa-miR-4302
3205007	TUBB2A	hsa-miR-4302
3205008	TUBB2A	hsa-miR-4302
616790	PRKACB	hsa-miR-4303
28381256	FOSB	hsa-miR-4305
1064891	PFKFB3	hsa-miR-4306
34544682	CYP1B1	hsa-miR-4307
34938789	OLR1	hsa-miR-4307
1050650	CD83	hsa-miR-4307
3839837	SAMD9	hsa-miR-4307
1042757	ST6GAL1	hsa-miR-4310
5029966	TNFAIP3	hsa-miR-4310
60418626	NLRP3	hsa-miR-4311
60129124	GIMAP8	hsa-miR-4311
3208919	ACSL1	hsa-miR-4315
2230341	GPR183	hsa-miR-431-5p
1049739	FOSB	hsa-miR-4317
2625	GBP1	hsa-miR-4320
4648296	PTGS2	hsa-miR-4321
14232	BTN3A2	hsa-miR-4322
34773212	BTN3A2	hsa-miR-4322
13306851	THBD	hsa-miR-432-3p
1803523	SLC7A5	hsa-miR-4325
17880703	PLK3	hsa-miR-432-5p
3034	MAP3K8	hsa-miR-432-5p
1053589	SBDS	hsa-miR-432-5p
1064898	PFKFB3	hsa-miR-4327
1802013	CTBP2	hsa-miR-4328
3208600	CTBP2	hsa-miR-4328
3208601	CTBP2	hsa-miR-4328
14573	TXNDC9	hsa-miR-4328
11046536	ETNK1	hsa-miR-4328
35543813	TMEM212	hsa-miR-4328
10916	CYP1B1	hsa-miR-433
2234687	IFNG	hsa-miR-4330
1060300	YPEL5	hsa-miR-4330
35191749	C2orf74	hsa-miR-4330
14232	BTN3A2	hsa-miR-4417
34773212	BTN3A2	hsa-miR-4417
4648294	PTGS2	hsa-miR-4418
1042526	TP53	hsa-miR-4419a
11930255	ATP10D	hsa-miR-4419b
4678198	DTX3L	hsa-miR-4419b
2660	OAS1	hsa-miR-4420
11554721	ST6GAL1	hsa-miR-4420
41282644	VEGFA	hsa-miR-4420
3183732	STX7	hsa-miR-4420
9835495	EAF1	hsa-miR-4420
10878441	LRRK2	hsa-miR-4421
35438708	DTX3L	hsa-miR-4421
3210095	GTF3A	hsa-miR-4422
10422572	FOSB	hsa-miR-4423-3p
56157208	OAS2	hsa-miR-4424
4648297	PTGS2	hsa-miR-4424
4141180	C17orf72	hsa-miR-4425
10782824	PRKACB	hsa-miR-4427
1054808	SCML1	hsa-miR-4427
5743784	TLR7	hsa-miR-4428
60647279	DTX3L	hsa-miR-4428
60129124	GIMAP8	hsa-miR-4428
1050289	OLR1	hsa-miR-4429
11551614	TP53INP2	hsa-miR-4430
4648289	PTGS2	hsa-miR-4433-3p
6088587	TP53INP2	hsa-miR-4433-3p
6142229	TP53INP2	hsa-miR-4433-3p
28381258	FOSB	hsa-miR-4434
1046353	CDK2AP2	hsa-miR-4434
1046363	CDK2AP2	hsa-miR-4434
61672126	FCAR	hsa-miR-4435
62123425	FCAR	hsa-miR-4435
3210240	EAF1	hsa-miR-4435
415523	SGSM1	hsa-miR-4435
13117	CSF1R	hsa-miR-4436b-3p
6076062	GZF1	hsa-miR-4436b-3p
1803022	ACADM	hsa-miR-4437
11571553	ATF3	hsa-miR-4437
41291287	PFKFB3	hsa-miR-4437
13306852	THBD	hsa-miR-4438
59218593	TRIM5	hsa-miR-4438
3826598	PMAIP1	hsa-miR-4439
1044061	STX7	hsa-miR-4441
12779059	PPIF	hsa-miR-4441
35550891	GIMAP8	hsa-miR-4441
13306851	THBD	hsa-miR-4443
35659787	TP53	hsa-miR-4443
2294053	OSBPL11	hsa-miR-4444
4150237	HBEGF	hsa-miR-4445-3p
3179567	PTGS2	hsa-miR-4445-5p
1131542	TNFSF10	hsa-miR-4445-5p
34779934	ADM	hsa-miR-4446-3p
4853173	MXD1	hsa-miR-4446-3p
2687	PLAUR	hsa-miR-4446-3p
2544919	ST8SIA4	hsa-miR-4446-5p
1044065	STX7	hsa-miR-4446-5p
5743785	TLR7	hsa-miR-4446-5p
3742486	C14orf119	hsa-miR-4446-5p
10046116	CDKN1A	hsa-miR-4447
41291285	PFKFB3	hsa-miR-4447
1060258	SLC7A5	hsa-miR-4447
5006	ADM	hsa-miR-4449
1060258	SLC7A5	hsa-miR-4449
60688846	MXD1	hsa-miR-4451
1064578	PARP1	hsa-miR-4452
11541590	PFKFB3	hsa-miR-4455
55671274	OAS2	hsa-miR-4456
28381251	FOSB	hsa-miR-4457
11401540	C14orf119	hsa-miR-4457
62525317	ATP6V1C1	hsa-miR-4458
1046573	UGDH	hsa-miR-4459
11914287	EAF1	hsa-miR-4459
4150239	HBEGF	hsa-miR-4462
4648290	PTGS2	hsa-miR-4465
41314497	MINPP1	hsa-miR-4465
60304316	FCAR	hsa-miR-4466
11884725	FOSL2	hsa-miR-4469
3176121	THBD	hsa-miR-4469
11752373	CASP8AP2	hsa-miR-4469
3208601	CTBP2	hsa-miR-4470
10046116	CDKN1A	hsa-miR-4472
35319355	OAS2	hsa-miR-4472
45572836	OAS2	hsa-miR-4472
41291285	PFKFB3	hsa-miR-4472
1060258	SLC7A5	hsa-miR-4472
11752373	CASP8AP2	hsa-miR-4473
34764881	XAF1	hsa-miR-4473
7601241	FOSL2	hsa-miR-4474-3p
28381256	FOSB	hsa-miR-4476
2240775	JMJD6	hsa-miR-4477a
11556740	PLK2	hsa-miR-4477b
4678198	DTX3L	hsa-miR-4478
62525328	ATP6V1C1	hsa-miR-448
11545325	CREM	hsa-miR-448
45481698	OAS1	hsa-miR-448
2849431	PMAIP1	hsa-miR-448
41268577	SNX9	hsa-miR-4480
9341266	CYP1B1	hsa-miR-4481
60864864	MXD1	hsa-miR-4481
1052282	ZC3H12A	hsa-miR-4481
35528190	GAPT	hsa-miR-4481
3208579	CTBP2	hsa-miR-4482-3p
36051049	OLR1	hsa-miR-4482-3p
41289178	FPGT	hsa-miR-4482-3p
32613	PLK2	hsa-miR-4482-5p
5744087	TLR8	hsa-miR-4482-5p
6087620	TP53INP2	hsa-miR-4482-5p
58414332	GAPT	hsa-miR-4482-5p
489941	FPGT	hsa-miR-4490
2687	PLAUR	hsa-miR-4492
8316	DDIT4	hsa-miR-4492
3180364	ZC3H12A	hsa-miR-4492
9309020	CYP1B1	hsa-miR-4495
689469	PTGS2	hsa-miR-4495
16857226	B3GNT5	hsa-miR-4495
1539232	PFKFB3	hsa-miR-4496
9034	NAMPT	hsa-miR-4496
1548083	NUDCD1	hsa-miR-4496
2687	PLAUR	hsa-miR-4498
8316	DDIT4	hsa-miR-4498
10206415	LBH	hsa-miR-4498
13117	CSF1R	hsa-miR-4499
62145230	PLGLB2	hsa-miR-4499
45465198	C14orf119	hsa-miR-4499
8177039	MAP3K8	hsa-miR-449b-3p
7601341	FOSL2	hsa-miR-449c-5p
62525317	ATP6V1C1	hsa-miR-4500
3188744	GBP1	hsa-miR-4501
35320531	CYP1B1	hsa-miR-4502
6977504	DBF4	hsa-miR-4502
2286585	JMJD6	hsa-miR-4502
34753910	HSD17B4	hsa-miR-4503
6142228	TP53INP2	hsa-miR-4503
10878441	LRRK2	hsa-miR-4503
17520676	LRRK2	hsa-miR-4503
17146787	DBF4	hsa-miR-4504
1060243	YPEL5	hsa-miR-4504
7623808	KBTBD8	hsa-miR-4504
2687	PLAUR	hsa-miR-4505
1804439	PTPN6	hsa-miR-4505
3180364	ZC3H12A	hsa-miR-4505
7911	GBP1	hsa-miR-4506
3811829	ATP10D	hsa-miR-4506
6935678	BTN3A2	hsa-miR-450a-3p
59839286	ZNF559	hsa-miR-450a-3p
1048734	GBP1	hsa-miR-450b-5p
3188766	GBP1	hsa-miR-450b-5p
1042526	TP53	hsa-miR-4510
1803173	ATF3	hsa-miR-4512
15306	GADD45B	hsa-miR-4512
6088588	TP53INP2	hsa-miR-4512
1042757	ST6GAL1	hsa-miR-4514
1803900	ACSL1	hsa-miR-4516
28381258	FOSB	hsa-miR-4516
1046353	CDK2AP2	hsa-miR-4516
1046363	CDK2AP2	hsa-miR-4516
12661	TNFAIP3	hsa-miR-4517
10704657	ZBTB10	hsa-miR-4517
2059041	STARD4	hsa-miR-4517
1126517	ADM	hsa-miR-4518
3180688	FOS	hsa-miR-4518
14232	BTN3A2	hsa-miR-4518
1046922	PHLDA1	hsa-miR-4518
1045089	DTX3L	hsa-miR-451a
12500	CSF1R	hsa-miR-4520a-3p
3755026	CYP1B1	hsa-miR-4520a-3p
12500	CSF1R	hsa-miR-4520a-5p
1064888	PFKFB3	hsa-miR-4520a-5p
12500	CSF1R	hsa-miR-4520b-5p
1064888	PFKFB3	hsa-miR-4520b-5p
35293303	HSD17B4	hsa-miR-4521
9365617	SNX9	hsa-miR-4522
61876273	NRIP3	hsa-miR-4522
4141181	C17orf72	hsa-miR-4522
14350	IER3	hsa-miR-4523
489941	FPGT	hsa-miR-452-3p
35561651	ATP6V1C1	hsa-miR-4524a-3p
1127448	SLC2A3	hsa-miR-4524a-3p
5995550	MAFF	hsa-miR-4524a-3p
1053594	SBDS	hsa-miR-4524a-3p
9341267	CYP1B1	hsa-miR-4524a-5p
1127448	SLC2A3	hsa-miR-4524b-3p
5995550	MAFF	hsa-miR-4524b-3p
9341267	CYP1B1	hsa-miR-4524b-5p
5743785	TLR7	hsa-miR-452-5p
59396124	TP53INP2	hsa-miR-452-5p
56285713	C17orf72	hsa-miR-4526
7680	MAD1L1	hsa-miR-4527
4655837	PDE4B	hsa-miR-4528
3208571	CTBP2	hsa-miR-4529-5p
1803900	ACSL1	hsa-miR-4531
1063932	DDIT4	hsa-miR-4532
36108637	DDIT4	hsa-miR-4532
4734685	ATP6V1C1	hsa-miR-4533
28381256	FOSB	hsa-miR-4533
1802172	IER3	hsa-miR-4533
28381981	TRIM5	hsa-miR-4533
13306851	THBD	hsa-miR-4534
2515205	ATP6V1C1	hsa-miR-4536-5p
1060253	SLC7A5	hsa-miR-4536-5p
13547	HDHD2	hsa-miR-4536-5p
2687	PLAUR	hsa-miR-4537
62087489	PRKAR1A	hsa-miR-4537
3208623	CTBP2	hsa-miR-4539
10878441	LRRK2	hsa-miR-4540
1060253	SLC7A5	hsa-miR-454-3p
1060254	SLC7A5	hsa-miR-454-3p
1137363	TMEM69	hsa-miR-454-3p
1054519	MARS	hsa-miR-454-5p
1064897	PFKFB3	hsa-miR-454-5p
41497048	CSF1R	hsa-miR-455-3p
1042694	DUSP4	hsa-miR-455-5p
35682891	XAF1	hsa-miR-455-5p
1804640	PLK3	hsa-miR-4633-3p
4648296	PTGS2	hsa-miR-4633-3p
1042642	ST6GAL1	hsa-miR-4635
17882252	TP53	hsa-miR-4635
34492231	LRRN3	hsa-miR-4635
7344208	TP53INP2	hsa-miR-4635
35550891	GIMAP8	hsa-miR-4638-3p
3219147	PARP1	hsa-miR-4638-5p
1064262	CREM	hsa-miR-4638-5p
35812684	XAF1	hsa-miR-4638-5p
3021481	CD1D	hsa-miR-4639-3p
1131340	NR4A3	hsa-miR-4639-3p
9379871	BTN3A2	hsa-miR-4639-3p
28381252	FOSB	hsa-miR-4640-3p
1064892	PFKFB3	hsa-miR-4640-3p
13389106	LBH	hsa-miR-4640-3p
1894821	SLC2A14	hsa-miR-4640-3p
7589796	FOSL2	hsa-miR-4640-5p
6088587	TP53INP2	hsa-miR-4640-5p
1389308	GAPT	hsa-miR-4642
45627531	GZF1	hsa-miR-4643
1064891	PFKFB3	hsa-miR-4644
1057738	PRKACB	hsa-miR-4644
1042526	TP53	hsa-miR-4644
2655	JUN	hsa-miR-4645-3p
35073632	ETNK1	hsa-miR-4645-3p
41282151	RNF20	hsa-miR-4645-3p
1064262	CREM	hsa-miR-4645-5p
11547020	DDIT3	hsa-miR-4646-5p
1064887	PFKFB3	hsa-miR-4646-5p
3180364	ZC3H12A	hsa-miR-4646-5p
1802172	IER3	hsa-miR-4647
1050648	CD83	hsa-miR-4648
4678198	DTX3L	hsa-miR-4649-3p
41430645	VEGFA	hsa-miR-4649-5p
45458901	TP53INP2	hsa-miR-4649-5p
1804090	JOSD1	hsa-miR-4650-5p
3219148	PARP1	hsa-miR-4651
28381258	FOSB	hsa-miR-4651
1042526	TP53	hsa-miR-4651
3180365	ZC3H12A	hsa-miR-4651
45622835	BTN3A3	hsa-miR-4652-3p
62063982	XAF1	hsa-miR-4652-3p
35850273	GAPT	hsa-miR-4652-3p
9365617	SNX9	hsa-miR-4652-5p
4648297	PTGS2	hsa-miR-4653-3p
41282151	RNF20	hsa-miR-4653-3p
4686848	ST6GAL1	hsa-miR-4653-5p
2174770	ZC3H12A	hsa-miR-4653-5p
41272170	CDKN1A	hsa-miR-4655-3p
6142229	TP53INP2	hsa-miR-4656
12500	CSF1R	hsa-miR-4657
9104	BTN3A2	hsa-miR-4658
5741890	TLR8	hsa-miR-4658
10171305	LBH	hsa-miR-4658
4150238	HBEGF	hsa-miR-4659a-3p
1049155	EGR3	hsa-miR-4659a-3p
14866	GBP1	hsa-miR-4659a-3p
3188678	GBP1	hsa-miR-4659a-3p
3134589	PTGS2	hsa-miR-4659a-3p
661617	KCTD12	hsa-miR-4659a-3p
4150238	HBEGF	hsa-miR-4659b-3p
1049155	EGR3	hsa-miR-4659b-3p
14866	GBP1	hsa-miR-4659b-3p
3188678	GBP1	hsa-miR-4659b-3p
3134589	PTGS2	hsa-miR-4659b-3p
661617	KCTD12	hsa-miR-4659b-3p
4831915	PHLDA1	hsa-miR-466
13078632	KBTBD8	hsa-miR-466
1365770	LRRK2	hsa-miR-4662a-3p
11541879	SLC7A5	hsa-miR-4662a-5p
11930255	ATP10D	hsa-miR-4663
1046363	CDK2AP2	hsa-miR-4665-5p
1017732	EREG	hsa-miR-4666a-3p
4648299	PTGS2	hsa-miR-4666a-3p
1802660	NR4A3	hsa-miR-4666a-5p
61546381	TRIM5	hsa-miR-4666a-5p
3176134	THBD	hsa-miR-4667-3p
11762	CD1D	hsa-miR-4668-3p
14866	GBP1	hsa-miR-4668-3p
3188857	GBP1	hsa-miR-4668-3p
58791443	RANBP2	hsa-miR-4668-3p
1388628	P2RY13	hsa-miR-4668-3p
41272172	CDKN1A	hsa-miR-4668-5p
3208580	CTBP2	hsa-miR-4668-5p
41420044	CX3CR1	hsa-miR-4668-5p
9341265	CYP1B1	hsa-miR-4668-5p
17131308	PRKACB	hsa-miR-4668-5p
8080739	PRKAR1A	hsa-miR-4668-5p
1059379	C14orf119	hsa-miR-4668-5p
3200051	C14orf119	hsa-miR-4668-5p
1803900	ACSL1	hsa-miR-4670-3p
3188717	GBP1	hsa-miR-4670-3p
10681831	SLC35A1	hsa-miR-4670-3p
10694624	SLC35A1	hsa-miR-4670-3p
34496174	SLC35A1	hsa-miR-4670-3p
1133505	MARCH1	hsa-miR-4670-3p
12349	GZF1	hsa-miR-4671-3p
2654	JUN	hsa-miR-4672
10681831	SLC35A1	hsa-miR-4672
10694624	SLC35A1	hsa-miR-4672
34496174	SLC35A1	hsa-miR-4672
1064262	CREM	hsa-miR-4673
14232	BTN3A2	hsa-miR-4674
34773212	BTN3A2	hsa-miR-4674
12206621	BTN3A2	hsa-miR-4674
59775513	XAF1	hsa-miR-4674
34779934	ADM	hsa-miR-4675
1053969	EREG	hsa-miR-4675
2816308	RGS1	hsa-miR-4675
56040843	ZBTB43	hsa-miR-4675
59396124	TP53INP2	hsa-miR-4676-3p
11571553	ATF3	hsa-miR-4677-3p
1158921	ATP6V1C1	hsa-miR-4677-3p
11539461	AHSA1	hsa-miR-4677-3p
27026	CTBP2	hsa-miR-4677-5p
3867458	CTBP2	hsa-miR-4677-5p
41301204	PRKACB	hsa-miR-4677-5p
11567829	PTGS2	hsa-miR-4677-5p
2816308	RGS1	hsa-miR-4677-5p
2233169	MINPP1	hsa-miR-4677-5p
9366654	BTN3A2	hsa-miR-4677-5p
35274545	MAT2B	hsa-miR-4677-5p
16857224	B3GNT5	hsa-miR-4678
1053969	EREG	hsa-miR-4679
10754558	NLRP3	hsa-miR-4679
3801791	DOCK4	hsa-miR-4680-3p
13475	ACN9	hsa-miR-4680-3p
11567829	PTGS2	hsa-miR-4680-5p
7344213	TP53INP2	hsa-miR-4680-5p
1058920	CSF1R	hsa-miR-4683
11539461	AHSA1	hsa-miR-4684-3p
35388773	CD1D	hsa-miR-4684-5p
571848	FPGT	hsa-miR-4684-5p
4951983	YPEL5	hsa-miR-4684-5p
35438708	DTX3L	hsa-miR-4684-5p
1041978	PMAIP1	hsa-miR-4685-3p
1473683	G0S2	hsa-miR-4685-3p
6093564	C20orf118	hsa-miR-4685-3p
55643411	PFKFB3	hsa-miR-4685-5p
56216931	PLGLB2	hsa-miR-4685-5p
5029967	TNFAIP3	hsa-miR-4687-3p
57315098	PDE4B	hsa-miR-4687-5p
34078085	C17orf72	hsa-miR-4687-5p
28628506	ARFIP1	hsa-miR-4688
9648	C17orf62	hsa-miR-4689
3853839	TLR7	hsa-miR-4690-5p
8177039	MAP3K8	hsa-miR-4691-3p
9648	C17orf62	hsa-miR-4691-3p
7163020	THBS1	hsa-miR-4691-5p
45481698	OAS1	hsa-miR-4693-3p
41291285	PFKFB3	hsa-miR-4693-3p
4151632	RB1	hsa-miR-4693-5p
1133071	DDX58	hsa-miR-4694-3p
952827	GIMAP8	hsa-miR-4694-3p
3177977	OAS1	hsa-miR-4694-5p
1058920	CSF1R	hsa-miR-4695-3p
1802172	IER3	hsa-miR-4695-3p
41328344	THBD	hsa-miR-4695-5p
3829148	PFKFB3	hsa-miR-4696
36102318	PFKFB3	hsa-miR-4696
55643411	PFKFB3	hsa-miR-4696
9366655	BTN3A2	hsa-miR-4697-3p
1050289	OLR1	hsa-miR-4698
7356	RPA2	hsa-miR-4698
5780531	G0S2	hsa-miR-4698
11290686	G0S2	hsa-miR-4698
34629121	HSPA1A	hsa-miR-4699-3p
34169771	CYP1B1	hsa-miR-4699-5p
3835508	PTGS2	hsa-miR-4699-5p
4648302	PTGS2	hsa-miR-4699-5p
9875078	ST6GAL1	hsa-miR-4699-5p
36101978	ST6GAL1	hsa-miR-4699-5p
12312458	ETNK1	hsa-miR-4699-5p
6957664	GIMAP8	hsa-miR-4699-5p
7689343	ARFIP1	hsa-miR-4701-3p
1064757	PRKAR1A	hsa-miR-4701-5p
1044416	IDH1	hsa-miR-4703-5p
13311	OAS2	hsa-miR-4703-5p
34882982	PRKACB	hsa-miR-4703-5p
5741889	TLR8	hsa-miR-4703-5p
12317915	ETNK1	hsa-miR-4703-5p
1058498	CTBP2	hsa-miR-4704-3p
1058501	CTBP2	hsa-miR-4704-3p
13306033	PTGS2	hsa-miR-4704-3p
1133073	DDX58	hsa-miR-4704-3p
7240965	PMAIP1	hsa-miR-4704-5p
34490298	ETNK1	hsa-miR-4704-5p
55882158	FPGT	hsa-miR-4706
5029967	TNFAIP3	hsa-miR-4708-3p
1017734	EREG	hsa-miR-4708-5p
7601341	FOSL2	hsa-miR-4708-5p
1044061	STX7	hsa-miR-4708-5p
5744178	TLR5	hsa-miR-4709-3p
3205008	TUBB2A	hsa-miR-4709-5p
4150240	HBEGF	hsa-miR-4710
41328344	THBD	hsa-miR-4710
34808193	C17orf72	hsa-miR-4710
1804090	JOSD1	hsa-miR-4711-5p
1389308	GAPT	hsa-miR-4711-5p
1049479	RGS1	hsa-miR-4713-3p
10422572	FOSB	hsa-miR-4714-3p
1045273	COQ5	hsa-miR-4714-5p
9917371	MXD1	hsa-miR-4715-3p
9916600	XAF1	hsa-miR-4715-3p
1064891	PFKFB3	hsa-miR-4716-3p
8512	IER3	hsa-miR-4716-3p
34544682	CYP1B1	hsa-miR-4716-5p
9333352	NFKBIA	hsa-miR-4716-5p
9366654	BTN3A2	hsa-miR-4716-5p
28412469	XAF1	hsa-miR-4716-5p
3210240	EAF1	hsa-miR-4716-5p
8708	JAG1	hsa-miR-4717-3p
41391746	CX3CR1	hsa-miR-4717-3p
1057738	PRKACB	hsa-miR-4717-3p
9393716	BTN3A2	hsa-miR-4718
35293303	HSD17B4	hsa-miR-4719
41267923	BTN3A3	hsa-miR-4719
1017736	EREG	hsa-miR-4720-3p
6142228	TP53INP2	hsa-miR-4720-3p
1054182	DOCK4	hsa-miR-4720-5p
41291287	PFKFB3	hsa-miR-4721
2240772	JMJD6	hsa-miR-4722-3p
1803605	FOSB	hsa-miR-4722-5p
5744088	TLR8	hsa-miR-4722-5p
7109861	TRIM34	hsa-miR-4722-5p
34611923	CARD6	hsa-miR-4722-5p
11914287	EAF1	hsa-miR-4722-5p
7109861	TRIM6-TRIM34	hsa-miR-4722-5p
4647017	JUN	hsa-miR-4723-5p
3214277	GADD45B	hsa-miR-4723-5p
1064891	PFKFB3	hsa-miR-4723-5p
1046363	CDK2AP2	hsa-miR-4723-5p
7268	HBEGF	hsa-miR-4724-3p
1048608	EAF1	hsa-miR-4724-3p
3208623	CTBP2	hsa-miR-4724-5p
1048671	GBP1	hsa-miR-4724-5p
3188701	GBP1	hsa-miR-4724-5p
11554721	ST6GAL1	hsa-miR-4724-5p
34490298	ETNK1	hsa-miR-4724-5p
55703732	OAS2	hsa-miR-4725-3p
17054823	TMEM69	hsa-miR-4725-3p
730214	SLC7A5	hsa-miR-4726-3p
1060258	SLC7A5	hsa-miR-4726-3p
7589796	FOSL2	hsa-miR-4726-5p
6088587	TP53INP2	hsa-miR-4726-5p
34600329	OAS2	hsa-miR-4727-3p
45505991	OAS2	hsa-miR-4727-3p
3802065	SAMD9	hsa-miR-4727-3p
10434	VEGFA	hsa-miR-4727-5p
13095160	TIPARP	hsa-miR-4727-5p
35886888	LRRN3	hsa-miR-4728-3p
11786226	ATP6V1C1	hsa-miR-4728-5p
2066933	CSF1R	hsa-miR-4728-5p
3216780	CSF1R	hsa-miR-4728-5p
3214277	GADD45B	hsa-miR-4728-5p
1042526	TP53	hsa-miR-4728-5p
55882158	FPGT	hsa-miR-4728-5p
41282151	RNF20	hsa-miR-4728-5p
34857337	LBH	hsa-miR-4728-5p
62318855	ANKRD33B	hsa-miR-4729
1048819	GBP1	hsa-miR-4731-3p
3214277	GADD45B	hsa-miR-4731-5p
1046363	CDK2AP2	hsa-miR-4731-5p
34779845	DTX3L	hsa-miR-4731-5p
1042361	DUSP2	hsa-miR-4733-3p
56216931	PLGLB2	hsa-miR-4733-3p
41301198	PRKACB	hsa-miR-4733-3p
35930058	IFRD1	hsa-miR-4733-5p
1051544	PRKACB	hsa-miR-4735-3p
1131568	TNFSF10	hsa-miR-4735-5p
41383045	THBS1	hsa-miR-4736
41527948	THBS1	hsa-miR-4736
4643786	DCK	hsa-miR-4738-3p
11557679	TRIM34	hsa-miR-4738-3p
1548083	NUDCD1	hsa-miR-4738-3p
11557679	TRIM6-TRIM34	hsa-miR-4738-3p
34698509	DTX3L	hsa-miR-4738-5p
55671274	OAS2	hsa-miR-4739
12779059	PPIF	hsa-miR-4739
[truncated: 4,859 more rows]

## Sheet: Sheet2
MS related miRNAs obained from Database
miRNA_name
hsa-let-7g
hsa-miR-122
hsa-miR-326
hsa-miR-422a
hsa-miR-572
hsa-miR-599
hsa-miR-614
hsa-miR-648
hsa-miR-1275
hsa-miR-142-3p
hsa-miR-186
hsa-miR-223
hsa-miR-491-5p
hsa-miR-664
hsa-miR-140-5p
hsa-miR-29a-3p
hsa-miR-320a
hsa-miR-338-3p
hsa-miR-27b-3p
hsa-let-7c
hsa-miR-15a-5p
hsa-miR-18a-5p
hsa-miR-21-5p
hsa-miR-22-3p
hsa-miR-23a-3p
hsa-miR-27a-3p
hsa-miR-28-5p
hsa-miR-30a-5p
hsa-miR-30a-3p
hsa-miR-29b-3p
hsa-miR-199a-5p
hsa-miR-148a-3p
hsa-miR-30d-5p
hsa-miR-34a-5p
hsa-miR-181b-5p
hsa-miR-181c-5p
hsa-miR-204-5p
hsa-miR-181a-3p
hsa-miR-214-3p
hsa-miR-219a-5p
hsa-miR-223-3p
hsa-miR-23b-3p
hsa-miR-124-3p
hsa-miR-130a-3p
hsa-miR-135a-5p
hsa-miR-142-5p
hsa-miR-152-3p
hsa-miR-9-5p
hsa-miR-126-3p
hsa-miR-146a-5p
hsa-miR-190a-5p
hsa-miR-193a-3p
hsa-miR-195-5p
hsa-miR-200c-3p
hsa-miR-155-5p
hsa-miR-365a-3p
hsa-miR-330-3p
hsa-miR-151a-3p
hsa-miR-20b-5p
hsa-miR-146b-5p
hsa-miR-497-5p
hsa-miR-181d-5p
hsa-miR-532-5p
hsa-miR-642a-5p
hsa-miR-650
hsa-miR-660-5p
hsa-miR-27a-5p
hsa-miR-27b-5p
hsa-miR-340-5p
hsa-miR-629-5p
hsa-miR-152-5p
hsa-miR-181d-3p
hsa-miR-17-5p
hsa-miR-19b-3p
hsa-miR-20a-5p
hsa-miR-181a-5p
hsa-miR-150-5p
hsa-miR-106b-5p
hsa-miR-633
hsa-miR-922
hsa-miR-19a-3p
hsa-miR-197-3p
hsa-miR-200b-3p
hsa-miR-125a-5p
hsa-miR-361-5p
hsa-miR-376a-3p
hsa-miR-485-3p
hsa-miR-486-5p
hsa-miR-16-2-3p
hsa-miR-1202
hsa-miR-3653-3p
hsa-miR-548am-3p
hsa-miR-4677-3p
hsa-let-7e
hsa-let-7a-5p
hsa-miR-24-3p
hsa-miR-25-3p
hsa-miR-26a-5p
hsa-miR-31-5p
hsa-miR-92a-3p
hsa-miR-95-3p
hsa-miR-196a-5p
hsa-miR-30c-5p
hsa-miR-139-5p
hsa-miR-7-5p
hsa-miR-210-3p
hsa-miR-218-5p
hsa-miR-30b-5p
hsa-miR-128-3p
hsa-miR-143-3p
hsa-miR-134-5p
hsa-miR-30e-5p
hsa-miR-30e-3p
hsa-miR-379-5p
hsa-miR-342-3p
hsa-miR-335-5p
hsa-miR-18b-5p
hsa-miR-193b-3p
hsa-miR-299-5p
hsa-miR-584-5p
hsa-miR-449b-5p
hsa-miR-671-5p
hsa-miR-21-3p
hsa-miR-22-5p
hsa-miR-92a-1-5p
hsa-miR-140-3p
hsa-miR-129-2-3p
hsa-miR-34c-3p
hsa-miR-337-5p
hsa-miR-338-5p
hsa-miR-20b-3p
hsa-miR-505-5p
hsa-miR-320b
hsa-miR-95-5p
hsa-miR-210-5p
hsa-miR-134-3p
hsa-miR-16-5p
hsa-miR-3676
hsa-miR-26b-5p
hsa-miR-96-5p
hsa-miR-141-3p
hsa-miR-145-5p
hsa-miR-378a-5p
hsa-miR-431-5p
hsa-miR-499a-5p
hsa-miR-502-5p
hsa-miR-542-5p
hsa-miR-26b-3p
hsa-miR-29b-2-5p

## Sheet: Sheet3
Correlation pairs of MS_miRNA,DEG_eSNP and DEG
SNP ID	Gene Symble	miRNA
7562	FOSL2	hsa-miR-1275
4698	ADM	hsa-miR-181a-5p
4698	ADM	hsa-miR-181b-5p
4698	ADM	hsa-miR-181c-5p
1049160	VEGFA	hsa-miR-505-5p
62525317	ATP6V1C1	hsa-let-7a-5p
62525317	ATP6V1C1	hsa-let-7c
1042273	GPR183	hsa-miR-106b-5p
3093280	FGL2	hsa-miR-106b-5p
1137363	TMEM69	hsa-miR-106b-5p
11541872	PHLDA1	hsa-miR-1202
1046363	CDK2AP2	hsa-miR-1275
1060254	SLC7A5	hsa-miR-130a-3p
1137363	TMEM69	hsa-miR-130a-3p
8019084	HIF1A	hsa-miR-135a-5p
34873475	HIF1A	hsa-miR-135a-5p
28412469	XAF1	hsa-miR-135a-5p
45575441	OAS2	hsa-miR-139-5p
55703732	OAS2	hsa-miR-139-5p
56078692	OAS2	hsa-miR-139-5p
56157208	OAS2	hsa-miR-139-5p
13376116	PRKACB	hsa-miR-139-5p
15459	BTG3	hsa-miR-139-5p
9835495	EAF1	hsa-miR-139-5p
1042642	ST6GAL1	hsa-miR-140-3p
58831255	C14orf119	hsa-miR-140-3p
17848065	ACADM	hsa-miR-140-5p
4648294	PTGS2	hsa-miR-140-5p
4648294	PTGS2	hsa-miR-141-3p
11554162	SGK1	hsa-miR-141-3p
1803899	ACSL1	hsa-miR-142-3p
28943595	HSD17B4	hsa-miR-142-3p
34396430	HSPA1B	hsa-miR-142-3p
41268577	SNX9	hsa-miR-142-3p
4645858	FOS	hsa-miR-142-5p
3188893	GBP1	hsa-miR-142-5p
17757228	GZF1	hsa-miR-142-5p
17520676	LRRK2	hsa-miR-142-5p
1042692	DUSP4	hsa-miR-143-3p
1042693	DUSP4	hsa-miR-143-3p
61758580	ATP10D	hsa-miR-143-3p
58791443	RANBP2	hsa-miR-145-5p
41281150	HIATL1	hsa-miR-145-5p
1126700	ATF3	hsa-miR-155-5p
45629236	FOS	hsa-miR-155-5p
12641970	ATP10D	hsa-miR-155-5p
6097	SERPINB2	hsa-miR-15a-5p
14860	ZFP36	hsa-miR-16-2-3p
571848	FPGT	hsa-miR-16-2-3p
6977504	DBF4	hsa-miR-16-2-3p
6097	SERPINB2	hsa-miR-16-5p
1804171	PCMT1	hsa-miR-16-5p
1042273	GPR183	hsa-miR-17-5p
1137363	TMEM69	hsa-miR-17-5p
28382129	TAF4	hsa-miR-181a-5p
3803332	C15orf48	hsa-miR-181a-5p
1365770	LRRK2	hsa-miR-181a-5p
3034	MAP3K8	hsa-miR-181b-5p
58665242	PMAIP1	hsa-miR-181b-5p
28382129	TAF4	hsa-miR-181b-5p
3803332	C15orf48	hsa-miR-181b-5p
1365770	LRRK2	hsa-miR-181b-5p
3034	MAP3K8	hsa-miR-181c-5p
58665242	PMAIP1	hsa-miR-181c-5p
28382129	TAF4	hsa-miR-181c-5p
1365770	LRRK2	hsa-miR-181c-5p
1051544	PRKACB	hsa-miR-18a-5p
1051544	PRKACB	hsa-miR-18b-5p
6097	SERPINB2	hsa-miR-195-5p
1804171	PCMT1	hsa-miR-195-5p
2057482	HIF1A	hsa-miR-196a-5p
35997067	XAF1	hsa-miR-196a-5p
3188733	GBP1	hsa-miR-199a-5p
1137363	TMEM69	hsa-miR-19a-3p
1137363	TMEM69	hsa-miR-19b-3p
1044416	IDH1	hsa-miR-200b-3p
7245349	PMAIP1	hsa-miR-200b-3p
34120135	PMAIP1	hsa-miR-200b-3p
364879	GIN1	hsa-miR-200b-3p
1044416	IDH1	hsa-miR-200c-3p
7245349	PMAIP1	hsa-miR-200c-3p
34120135	PMAIP1	hsa-miR-200c-3p
1042273	GPR183	hsa-miR-20a-5p
1137363	TMEM69	hsa-miR-20a-5p
35498666	KBTBD8	hsa-miR-20b-3p
1042273	GPR183	hsa-miR-20b-5p
1137363	TMEM69	hsa-miR-20b-5p
1060243	YPEL5	hsa-miR-21-3p
8512	IER3	hsa-miR-214-3p
35520682	HSD17B4	hsa-miR-21-5p
1071676	IL1B	hsa-miR-21-5p
1804141	PDE4B	hsa-miR-21-5p
3182249	ST6GAL1	hsa-miR-21-5p
11554722	ST6GAL1	hsa-miR-21-5p
10802501	NLRP3	hsa-miR-223-3p
2816308	RGS1	hsa-miR-22-5p
3179769	THBD	hsa-miR-23a-3p
3179769	THBD	hsa-miR-23b-3p
1803022	ACADM	hsa-miR-24-3p
2234687	IFNG	hsa-miR-24-3p
3176927	PDE4B	hsa-miR-24-3p
41314497	MINPP1	hsa-miR-26a-5p
1419008	GZF1	hsa-miR-26a-5p
35388773	CD1D	hsa-miR-26b-3p
11567829	PTGS2	hsa-miR-26b-3p
5029967	TNFAIP3	hsa-miR-26b-3p
32613	PLK2	hsa-miR-26b-3p
41314497	MINPP1	hsa-miR-26b-5p
1419008	GZF1	hsa-miR-26b-5p
45480193	FOS	hsa-miR-27a-3p
1044061	STX7	hsa-miR-27a-3p
1044062	STX7	hsa-miR-27a-3p
34637389	BTN3A2	hsa-miR-27a-3p
17565261	SNX9	hsa-miR-27a-3p
45480193	FOS	hsa-miR-27b-3p
1044062	STX7	hsa-miR-27b-3p
34637389	BTN3A2	hsa-miR-27b-3p
17565261	SNX9	hsa-miR-27b-3p
1071676	IL1B	hsa-miR-27b-5p
2660	OAS1	hsa-miR-28-5p
4648296	PTGS2	hsa-miR-28-5p
1063489	CBX1	hsa-miR-299-5p
1042361	DUSP2	hsa-miR-29a-3p
1042361	DUSP2	hsa-miR-29b-3p
9341262	CYP1B1	hsa-miR-30a-3p
1048772	GBP1	hsa-miR-30a-3p
3188809	GBP1	hsa-miR-30a-3p
3183620	IFRD1	hsa-miR-30a-3p
3183621	IFRD1	hsa-miR-30a-3p
1071676	IL1B	hsa-miR-30a-3p
34554723	PRKACB	hsa-miR-30a-3p
9309020	CYP1B1	hsa-miR-30a-5p
16857226	B3GNT5	hsa-miR-30a-5p
9309020	CYP1B1	hsa-miR-30b-5p
16857226	B3GNT5	hsa-miR-30b-5p
9309020	CYP1B1	hsa-miR-30c-5p
16857226	B3GNT5	hsa-miR-30c-5p
9309020	CYP1B1	hsa-miR-30d-5p
16857226	B3GNT5	hsa-miR-30d-5p
9341262	CYP1B1	hsa-miR-30e-3p
1048772	GBP1	hsa-miR-30e-3p
3188809	GBP1	hsa-miR-30e-3p
3183620	IFRD1	hsa-miR-30e-3p
3183621	IFRD1	hsa-miR-30e-3p
34554723	PRKACB	hsa-miR-30e-3p
17146787	DBF4	hsa-miR-30e-3p
9309020	CYP1B1	hsa-miR-30e-5p
16857226	B3GNT5	hsa-miR-30e-5p
3829148	PFKFB3	hsa-miR-31-5p
36102318	PFKFB3	hsa-miR-31-5p
55643411	PFKFB3	hsa-miR-31-5p
1050289	OLR1	hsa-miR-320a
1050289	OLR1	hsa-miR-320b
3180365	ZC3H12A	hsa-miR-326
34882982	PRKACB	hsa-miR-330-3p
12661	TNFAIP3	hsa-miR-330-3p
5029967	TNFAIP3	hsa-miR-330-3p
17146787	DBF4	hsa-miR-330-3p
1048819	GBP1	hsa-miR-335-5p
11210432	FPGT	hsa-miR-338-3p
1062820	TP53INP2	hsa-miR-338-3p
1017732	EREG	hsa-miR-338-5p
1803605	FOSB	hsa-miR-342-3p
1059366	DUSP6	hsa-miR-361-5p
7240310	PMAIP1	hsa-miR-365a-3p
62152022	MXD1	hsa-miR-376a-3p
35781052	PFKFB3	hsa-miR-376a-3p
35686785	DCK	hsa-miR-422a
6060004	TP53INP2	hsa-miR-422a
2230341	GPR183	hsa-miR-431-5p
11571553	ATF3	hsa-miR-4677-3p
1158921	ATP6V1C1	hsa-miR-4677-3p
11539461	AHSA1	hsa-miR-4677-3p
3170167	FOSB	hsa-miR-491-5p
6097	SERPINB2	hsa-miR-497-5p
8177037	MAP3K8	hsa-miR-499a-5p
7227934	PMAIP1	hsa-miR-499a-5p
35952194	DYNC1I2	hsa-miR-502-5p
13386455	LBH	hsa-miR-502-5p
1048608	EAF1	hsa-miR-502-5p
13306852	THBD	hsa-miR-505-5p
17412738	DNAJC13	hsa-miR-548am-3p
4552	PCMT1	hsa-miR-584-5p
61758579	ATP10D	hsa-miR-633
689467	PTGS2	hsa-miR-642a-5p
689468	PTGS2	hsa-miR-642a-5p
3176121	THBD	hsa-miR-642a-5p
17886358	TP53	hsa-miR-642a-5p
11752373	CASP8AP2	hsa-miR-642a-5p
28943595	HSD17B4	hsa-miR-648
5006	ADM	hsa-miR-650
3034	MAP3K8	hsa-miR-650
41328344	THBD	hsa-miR-650
41527948	THBS1	hsa-miR-650
17884586	TP53	hsa-miR-650
34925966	DTX3L	hsa-miR-650
34873475	HIF1A	hsa-miR-660-5p
41282151	RNF20	hsa-miR-7-5p
45616942	OAS2	hsa-miR-92a-1-5p
730214	SLC7A5	hsa-miR-92a-1-5p
1060254	SLC7A5	hsa-miR-9-5p
12422278	LRRK2	hsa-miR-9-5p
4251924	PLAUR	hsa-miR-96-5p
62494314	EGR3	hsa-let-7a-5p
5029406	CCL3	hsa-let-7a-5p
62494314	EGR3	hsa-let-7c
17194416	EEA1	hsa-miR-1202
8987	RACGAP1	hsa-miR-130a-3p
916973	OAS2	hsa-miR-139-5p
10505755	OLR1	hsa-miR-140-3p
7332	PPIF	hsa-miR-140-3p
2129613	ETNK1	hsa-miR-140-3p
9318457	KCTD12	hsa-miR-140-3p
34856860	DPYD	hsa-miR-142-5p
2824386	BTG3	hsa-miR-142-5p
7324963	KCTD12	hsa-miR-142-5p
11055940	SLC2A14	hsa-miR-142-5p
11055941	SLC2A14	hsa-miR-142-5p
17156197	FGL2	hsa-miR-143-3p
35205895	STARD4	hsa-miR-145-5p
36112954	MEGF9	hsa-miR-148a-3p
6440735	P2RY13	hsa-miR-150-5p
6042492	SIRPB2	hsa-miR-150-5p
832337	RGPD4	hsa-miR-150-5p
832337	RGPD3	hsa-miR-150-5p
256996	TICAM2	hsa-miR-151a-3p
296738	RACGAP1	hsa-miR-15a-5p
34707191	SLC2A14	hsa-miR-15a-5p
257317	GIN1	hsa-miR-16-2-3p
296738	RACGAP1	hsa-miR-16-5p
34707191	SLC2A14	hsa-miR-16-5p
8987	RACGAP1	hsa-miR-17-5p
55898535	IFNG	hsa-miR-181a-5p
58856914	JMJD6	hsa-miR-181a-5p
55898535	IFNG	hsa-miR-181b-5p
58856914	JMJD6	hsa-miR-181b-5p
55898535	IFNG	hsa-miR-181c-5p
58856914	JMJD6	hsa-miR-181c-5p
4237962	OLR1	hsa-miR-18a-5p
296738	RACGAP1	hsa-miR-195-5p
34707191	SLC2A14	hsa-miR-195-5p
4034677	ELL2	hsa-miR-19a-3p
34926621	VPS35	hsa-miR-19a-3p
4034677	ELL2	hsa-miR-19b-3p
34926621	VPS35	hsa-miR-19b-3p
2697366	NR4A2	hsa-miR-204-5p
1065526	RGPD1	hsa-miR-204-5p
8987	RACGAP1	hsa-miR-20a-5p
28514414	KCTD12	hsa-miR-20b-3p
11544369	GRASP	hsa-miR-20b-3p
8987	RACGAP1	hsa-miR-20b-5p
916973	OAS2	hsa-miR-22-5p
14017	COQ5	hsa-miR-22-5p
41287028	KCTD12	hsa-miR-25-3p
11670917	ZNF260	hsa-miR-25-3p
2296883	GBP1	hsa-miR-26b-5p
34707191	SLC2A14	hsa-miR-26b-5p
13337	KCTD12	hsa-miR-27a-5p
55882088	DUSP4	hsa-miR-28-5p
3734665	CD83	hsa-miR-299-5p
57248097	OSM	hsa-miR-29a-3p
16837089	RIT1	hsa-miR-29a-3p
57248097	OSM	hsa-miR-29b-3p
3751978	CBX1	hsa-miR-30a-5p
3751978	CBX1	hsa-miR-30b-5p
11135441	ELL2	hsa-miR-30b-5p
3751978	CBX1	hsa-miR-30c-5p
11135441	ELL2	hsa-miR-30c-5p
3751978	CBX1	hsa-miR-30d-5p
11135441	ELL2	hsa-miR-30d-5p
3751978	CBX1	hsa-miR-30e-5p
12317584	PHLDA1	hsa-miR-31-5p
36031726	GIMAP6	hsa-miR-320a
36031726	GIMAP6	hsa-miR-320b
7294433	PHLDA1	hsa-miR-326
55720411	MEGF9	hsa-miR-330-3p
12816	JUN	hsa-miR-330-3p
41275080	IRS2	hsa-miR-330-3p
268571	LACTB2	hsa-miR-330-3p
1423380	ST8SIA4	hsa-miR-338-3p
2348978	ELL2	hsa-miR-338-5p
257317	GIN1	hsa-miR-338-5p
10236444	SAMD9L	hsa-miR-338-5p
7029002	DDX58	hsa-miR-340-5p
28600681	SAMD9	hsa-miR-340-5p
7324963	KCTD12	hsa-miR-340-5p
1877670	EGR3	hsa-miR-342-3p
62627406	SGK1	hsa-miR-342-3p
2292899	ACSL1	hsa-miR-34a-5p
11554926	CBX1	hsa-miR-34c-3p
16841607	ERMN	hsa-miR-361-5p
1054519	DDIT3	hsa-miR-376a-3p
16354	PDE4B	hsa-miR-376a-3p
58628744	SLC7A5	hsa-miR-431-5p
2292899	ACSL1	hsa-miR-449b-5p
4862413	ACSL1	hsa-miR-449b-5p
7467	IFRD1	hsa-miR-485-3p
62466121	SAMD9L	hsa-miR-491-5p
296738	RACGAP1	hsa-miR-497-5p
34707191	SLC2A14	hsa-miR-497-5p
257316	GIN1	hsa-miR-532-5p
56006088	SGK1	hsa-miR-548am-3p
57657256	ST8SIA4	hsa-miR-548am-3p
10735304	EEA1	hsa-miR-548am-3p
35685841	IRS2	hsa-miR-548am-3p
7485921	RACGAP1	hsa-miR-548am-3p
3741856	SLC2A14	hsa-miR-650
35852130	TRIM5	hsa-miR-671-5p
10235151	GIMAP6	hsa-miR-7-5p
41287028	KCTD12	hsa-miR-92a-3p
11670917	ZNF260	hsa-miR-92a-3p
35200545	MEF2C	hsa-miR-9-5p
17470762	DPYD	hsa-miR-96-5p
1049638	RGPD1	hsa-miR-96-5p
1049638	RGPD2	hsa-miR-96-5p
56743633	PRF1	hsa-miR-181a-5p
56743633	PRF1	hsa-miR-181b-5p
56743633	PRF1	hsa-miR-181c-5p
1049160	VEGFA	hsa-miR-1275
56395423	TRIB1	hsa-miR-1275
3735085	GIMAP6	hsa-miR-9-5p
1046353	CDK2AP2	hsa-miR-106b-5p
41268579	SNX9	hsa-miR-106b-5p
10422572	FOSB	hsa-miR-124-3p
1136646	CDKN1A	hsa-miR-1275
2066934	CSF1R	hsa-miR-1275
3182249	ST6GAL1	hsa-miR-1275
1042526	TP53	hsa-miR-1275
56369948	OAS2	hsa-miR-139-5p
1064578	PARP1	hsa-miR-140-3p
1053639	DDIT4	hsa-miR-140-3p
1051495	JAG1	hsa-miR-140-5p
6087620	TP53INP2	hsa-miR-140-5p
16857224	B3GNT5	hsa-miR-142-5p
1042694	DUSP4	hsa-miR-143-3p
2240773	JMJD6	hsa-miR-143-3p
16857225	B3GNT5	hsa-miR-145-5p
45575441	OAS2	hsa-miR-148a-3p
8007589	C14orf119	hsa-miR-150-5p
9341261	CYP1B1	hsa-miR-151a-3p
9341262	CYP1B1	hsa-miR-16-2-3p
1046353	CDK2AP2	hsa-miR-17-5p
41268579	SNX9	hsa-miR-17-5p
1460008	EREG	hsa-miR-181a-5p
689470	PTGS2	hsa-miR-181a-5p
10681831	SLC35A1	hsa-miR-181a-5p
10694624	SLC35A1	hsa-miR-181a-5p
1460008	EREG	hsa-miR-181b-5p
689470	PTGS2	hsa-miR-181b-5p
10681831	SLC35A1	hsa-miR-181b-5p
10694624	SLC35A1	hsa-miR-181b-5p
1460008	EREG	hsa-miR-181c-5p
689470	PTGS2	hsa-miR-181c-5p
10681831	SLC35A1	hsa-miR-181c-5p
10694624	SLC35A1	hsa-miR-181c-5p
1802821	HIF1A	hsa-miR-193a-3p
1802821	HIF1A	hsa-miR-193b-3p
3025040	VEGFA	hsa-miR-199a-5p
162562	CYP1B1	hsa-miR-200b-3p
11539	GABARAPL1	hsa-miR-200b-3p
162562	CYP1B1	hsa-miR-200c-3p
11539	GABARAPL1	hsa-miR-200c-3p
16979655	ZNF559	hsa-miR-204-5p
1063297	EAF1	hsa-miR-204-5p
1046353	CDK2AP2	hsa-miR-20a-5p
41268579	SNX9	hsa-miR-20a-5p
4648293	PTGS2	hsa-miR-20b-3p
13547	HDHD2	hsa-miR-20b-3p
1046353	CDK2AP2	hsa-miR-20b-5p
41268579	SNX9	hsa-miR-20b-5p
1642789	TP53	hsa-miR-21-3p
3768008	GOLPH3L	hsa-miR-21-3p
4647015	JUN	hsa-miR-214-3p
8905	PRKAR1A	hsa-miR-214-3p
1046367	GIMAP5	hsa-miR-214-3p
1046367	GIMAP1-GIMAP5	hsa-miR-214-3p
4648298	PTGS2	hsa-miR-21-5p
1050286	OLR1	hsa-miR-24-3p
15344	IDH1	hsa-miR-25-3p
45481698	OAS1	hsa-miR-27a-5p
4648297	PTGS2	hsa-miR-28-5p
34513310	CREM	hsa-miR-30a-5p
34513310	CREM	hsa-miR-30b-5p
34513310	CREM	hsa-miR-30c-5p
34513310	CREM	hsa-miR-30d-5p
34513310	CREM	hsa-miR-30e-5p
45458901	TP53INP2	hsa-miR-31-5p
41420044	CX3CR1	hsa-miR-320a
41420044	CX3CR1	hsa-miR-320b
3177639	MAFF	hsa-miR-326
1064893	PFKFB3	hsa-miR-335-5p
1802040	VEGFA	hsa-miR-338-5p
16857224	B3GNT5	hsa-miR-340-5p
1962685	EREG	hsa-miR-342-3p
28381254	FOSB	hsa-miR-342-3p
1131340	NR4A3	hsa-miR-342-3p
1064898	PFKFB3	hsa-miR-34a-5p
1803662	ZFP36	hsa-miR-34a-5p
56040843	ZBTB43	hsa-miR-34a-5p
753121	PPIF	hsa-miR-365a-3p
10052625	CARD6	hsa-miR-376a-3p
1053591	SBDS	hsa-miR-422a
3210238	EAF1	hsa-miR-422a
1064898	PFKFB3	hsa-miR-449b-5p
1803662	ZFP36	hsa-miR-449b-5p
56040843	ZBTB43	hsa-miR-449b-5p
3210166	CCL3	hsa-miR-4677-3p
1050649	CD83	hsa-miR-485-3p
13475	ACN9	hsa-miR-485-3p
3183620	IFRD1	hsa-miR-491-5p
1060243	YPEL5	hsa-miR-491-5p
62150255	RGPD4	hsa-miR-491-5p
62150255	RGPD3	hsa-miR-491-5p
6141507	TP53INP2	hsa-miR-499a-5p
2687	PLAUR	hsa-miR-505-5p
1049479	RGS1	hsa-miR-505-5p
9267570	HSPA1B	hsa-miR-548am-3p
1053599	SBDS	hsa-miR-548am-3p
11557679	TRIM34	hsa-miR-548am-3p
61303135	TRIM5	hsa-miR-548am-3p
11557679	TRIM6-TRIM34	hsa-miR-548am-3p
2240772	JMJD6	hsa-miR-614
35007233	GALNT7	hsa-miR-629-5p
9458905	SNX9	hsa-miR-642a-5p
10704657	ZBTB10	hsa-miR-642a-5p
28381257	FOSB	hsa-miR-660-5p
35498666	KBTBD8	hsa-miR-660-5p
17054823	TMEM69	hsa-miR-7-5p
11541589	PFKFB3	hsa-miR-922
8512	IER3	hsa-miR-922
15344	IDH1	hsa-miR-92a-3p
57657256	ST8SIA4	hsa-miR-106b-5p
35656984	JMJD6	hsa-miR-1275
34819683	C17orf62	hsa-miR-1275
13337	KCTD12	hsa-miR-135a-5p
11545562	HIATL1	hsa-miR-142-3p
3833344	BTG3	hsa-miR-142-5p
3828609	CSF1R	hsa-miR-155-5p
57657256	ST8SIA4	hsa-miR-17-5p
6042492	SIRPB2	hsa-miR-199a-5p
1054519	DDIT3	hsa-miR-204-5p
2615499	NR4A2	hsa-miR-204-5p
57657256	ST8SIA4	hsa-miR-20a-5p
57657256	ST8SIA4	hsa-miR-20b-5p
10075853	ST8SIA4	hsa-miR-218-5p
34794	GIN1	hsa-miR-26b-3p
2625416	TLR8	hsa-miR-320a
2625416	TLR8	hsa-miR-320b
3751978	CBX1	hsa-miR-337-5p
11546511	MAT2B	hsa-miR-378a-5p
17175483	SLC7A5	hsa-miR-431-5p
3814190	PFKFB3	hsa-miR-4677-3p
62494314	EGR3	hsa-miR-491-5p
2271262	LBH	hsa-miR-491-5p
55868120	IDI1	hsa-miR-499a-5p
34614586	EGR3	hsa-miR-614
10235151	GIMAP6	hsa-miR-648
41275080	IRS2	hsa-miR-660-5p
34607064	TP53	hsa-miR-922
55696854	DPYD	hsa-miR-96-5p
10639858	EAF1	hsa-miR-21-3p
35440828	ADM	hsa-miR-338-5p
56395423	TRIB1	hsa-miR-542-5p
7562	FOSL2	hsa-miR-650
56407566	CBX1	hsa-miR-499a-5p
62521034	TRIB1	hsa-miR-650
3817143	LBH	hsa-miR-642a-5p

## Sheet: Sheet4
GWASdb_MS_SNP
MS_SNP
rs3748816
rs4648356
rs10492972
rs4654925
rs10903122
rs282177
rs11811702
rs10789144
rs11211176
rs2809944
rs17418151
rs2201841
rs11465804
rs2647389
rs7517698
rs233100
rs11165441
rs11164607
rs4970700
rs12743520
rs11808092
rs1415296
rs10735781
rs11800848
rs11810217
rs4847267
rs34202284
rs6680578
rs11164814
rs6604026
rs7514280
rs10874746
rs2811600
rs35183060
rs7536563
rs2255723
rs11164835
rs9651257
rs11164838
rs12745968
rs17380908
rs521428
rs532834
rs496465
rs12048904
rs11581062
rs1182580
rs41419745
rs11185337
rs4838992
rs6679677
rs2476601
rs12025416
rs12044852
rs1335532
rs2300747
rs11586238
rs4085613
rs3761959
rs2274910
rs10800309
rs1538370
rs1011731
rs9286879
rs2205960
rs4916321
rs12047808
rs745317
rs533259
rs10754012
rs2760524
rs2816316
rs1323292
rs1359062
rs7522462
rs296547
rs11584383
rs12122721
rs3024505
rs12083980
rs11118986
rs841503
rs2936040
rs4233060
rs4669226
rs1109670
rs13013085
rs4668486
rs1438131
rs7572644
rs4666040
rs7577363
rs867574
rs6544170
rs6718520
rs12466022
rs7583622
rs698853
rs41385746
rs34498089
rs17039547
rs13017599
rs13003464
rs934734
rs17035378
rs7592330
rs7595037
rs10205487
rs1529409
rs2861913
rs11676922
rs917997
rs17174870
rs651477
rs6744496
rs1437898
rs1821625
rs4953911
rs882300
rs2334310
rs1990760
rs13010713
rs7574865
rs281783
rs10191601
rs1980422
rs3087243
rs4675374
rs41482445
rs17113
rs7608541
rs10201872
rs3828309
rs1597944
rs7644569
rs3804945
rs9821630
rs11129295
rs669607
rs170934
rs13314993
rs13098911
rs3197999
rs1500710
rs6445975
rs13315591
rs753821
rs2365045
rs267122
rs267120
rs9861174
rs9829960
rs1658146
rs301923
rs771767
rs2028597
rs9657904
rs12487066
rs12487092
rs12695132
rs6798831
rs11712428
rs11712165
rs1132200
rs2293370
rs4285028
rs2681424
rs4308217
rs9282641
rs995540
rs908821
rs1841770
rs1356122
rs12638253
rs17810546
rs4680534
rs2243123
rs10936599
rs2280391
rs9840074
rs1464510
rs6808275
rs1546736
rs10937486
rs10028937
rs9684799
rs10517086
rs874040
rs6448715
rs1447372
rs11736632
rs10518025
rs1390088
rs2868879
rs1880943
rs2695217
rs10516487
rs228614
rs10015924
rs13151961
rs17388568
rs6822844
rs1478091
rs769673
rs12644284
rs1898593
rs12513380
rs4600896
rs1903524
rs17090640
rs7672826
rs1031313
rs6821894
rs11734807
rs4957048
rs2962694
rs2963341
rs13359910
rs9313264
rs6555588
rs706306
rs6861526
rs931555
rs6897932
rs1304732
rs350058
rs4613763
rs6896969
rs9292777
rs6859219
rs4301182
rs7709237
rs154447
rs32477
rs26232
rs576547
rs395561
rs1105769
rs1105770
rs2188962
rs20541
rs756699
rs4246794
rs2302103
rs1062158
rs11747270
rs888989
rs7708392
rs17728338
rs6556352
rs4704970
rs2082412
rs2546890
rs10045431
rs6887695
rs10866713
rs2431697
rs168678
rs11957313
rs4976682
rs11949767
rs6885410
rs4075958
rs11755724
rs6941421
rs6908425
rs11968423
rs3130252
rs1610585
rs1610593
rs1632953
rs1059174
rs1736921
rs2735057
rs1736916
rs1736913
rs2523393
rs1610603
rs1633070
rs1633069
rs1737076
rs1610630
rs1737068
rs1737060
rs1737055
rs1632971
rs3094159
rs3094157
rs3132718
rs3132712
rs2735096
rs417162
rs1655904
rs2508037
rs9260489
rs2523990
rs2517646
rs3132671
rs3130391
rs3132666
rs1013518
rs2844780
rs3094055
rs2516675
rs3130000
rs3094123
rs3130649
rs3095350
rs3095345
rs2517451
rs2530710
rs2530709
rs2844678
rs1634731
rs6903912
rs2844670
rs2517538
rs4713429
rs9262615
rs9262635
rs9262636
rs2523881
rs2523880
rs9263597
rs2233969
rs1265052
rs2233967
rs3130975
rs3130981
rs3095324
rs386579334
rs111199278
rs3095314
rs3130558
rs3131009
rs528878831
rs3130564
rs2074478
rs2233952
rs1265074
rs2073723
rs3130933
rs2106074
rs9263804
rs3130501
rs3132524
rs3095238
rs3094609
rs4516988
rs3130952
rs9295965
rs3130531
rs3095250
rs3130532
rs3130534
rs3130712
rs3130542
rs3132486
rs6906846
rs7382297
rs2524095
rs2524089
rs6457374
rs6931332
rs2596503
rs2523535
rs2523534
rs41519045
rs2844558
rs5025315
rs5022119
rs2523638
rs3997982
rs2596571
rs2523485
rs3016013
rs3099848
rs2395485
rs2596517
rs2596464
rs2516460
rs3131622
rs3131621
rs2844507
rs2844505
rs2248373
rs2523650
rs2904776
rs2905747
rs9267247
rs3131631
rs3130637
rs3093993
rs3095227
rs2734573
rs3093983
rs3115537
rs3093978
rs2516393
rs2736177
rs2736172
rs3132453
rs1077394
rs760293
rs3130050
rs805297
rs2227956
rs9267649
rs660550
rs644827
rs2242665
rs9267658
rs486416
rs535586
rs659445
rs644045
rs2734335
rs2072633
rs630379
rs437179
rs406936
rs454212
rs387608
rs389883
rs12333245
rs2269429
rs3130287
rs169496
rs204899
rs17421624
rs3134954
rs9296009
rs3134603
rs2269423
rs3134943
rs3131294
rs438475
rs415929
rs3132946
rs3134931
rs404890
rs2849015
rs9267873
rs3134926
rs3130299
rs9267954
rs3115576
rs6936204
rs9267971
rs3130311
rs3115573
rs9267992
rs3130315
rs3130320
rs926070
rs544358
rs547261
rs574710
rs539703
rs547077
rs12524063
rs9405090
rs926591
rs3129900
rs9368716
rs1033500
rs4959093
rs910050
rs910049
rs9268302
rs6907322
rs2894249
rs2395150
rs9268368
rs3129932
rs3129934
rs9268384
rs3129941
rs9268402
rs9391858
rs9268403
rs9268418
rs9268429
rs12528797
rs3117098
rs2076533
rs2076530
rs9268480
rs3806156
rs3763307
rs3135377
rs9268557
rs9268560
rs3135363
rs3135342
rs7756262
rs3135338
rs5000563
rs2395173
rs3129871
rs3129872
rs9268645
rs3129877
rs3135392
rs3129882
rs2239804
rs7192
rs3177928
rs7194
rs3135388
rs2395182
rs3129889
rs9268831
rs9268832
rs6903608
rs9268853
rs9268858
rs9268877
rs9270986
rs615672
rs9271366
rs3129768
rs9272105
rs2040406
rs9272346
rs9469220
rs2157051
rs6457617
rs6457620
rs2647046
rs9275418
rs9275523
rs9275572
rs9275765
rs9275772
rs9461799
rs9469240
rs9275793
rs2227127
rs9276429
rs9276431
rs9276432
rs9276440
rs2301271
rs7768538
rs7453920
rs2051549
rs6902723
rs6903130
rs9296044
rs2857212
rs2857210
rs2621384
rs2857161
rs2621383
rs2621382
rs2157082
rs2857154
rs2857136
rs2857129
rs1800454
rs241427
rs9276825
rs241403
rs3101942
rs151719
rs1050391
rs11539216
rs17840186
rs3129305
rs3130578
rs3130179
rs4715222
rs16888118
rs6454267
rs854917
rs10806425
rs11755527
rs12212193
rs4388292
rs733724
rs11962089
rs7746082
rs548234
rs6568431
rs9480865
rs2297939
rs524235
rs9388489
rs802734
rs9321490
rs11154801
rs17066096
rs9321619
rs13192841
rs2327832
rs10499194
rs6920220
rs892999
rs5029937
rs610604
rs9376783
rs9403525
rs6915752
rs6570578
rs13208348
rs17250161
rs11756951
rs1738074
rs212389
rs3127390
rs2301436
rs3093023
rs6952809
rs1843938
rs10259085
rs2214543
rs2908734
rs2240571
rs17280766
rs2214935
rs2066992
rs7804356
rs849142
rs2391720
rs550396
rs17675986
rs17748997
rs11984075
rs1427658
rs1456893
rs4948088
rs7789940
rs758944
rs7779014
rs17149161
rs1509913
rs6467970
rs4529380
rs7809799
rs10487180
rs10244615
rs17157903
rs868824
rs17157942
rs1528041
rs1881164
rs1950004
rs7778910
rs10243024
rs10488631
rs6942866
rs4389875
rs354033
rs11772925
rs7822510
rs13279485
rs13272161
rs1529316
rs11786333
rs9644677
rs6986386
rs2736340
rs3924999
rs10954863
rs11991723
rs4609155
rs4733171
rs1962862
rs6993479
rs348164
rs2116078
rs4738350
rs1520333
rs16905824
rs2369294
rs6993386
rs4150894
rs39767
rs4615542
rs11992975
rs13256880
rs17749211
rs1551398
rs4410871
rs2019960
rs9792269
rs6984045
rs6998423
rs2922350
rs1868368
rs2614724
rs4961252
rs10975130
rs2804262
rs10975200
rs9696204
rs4741717
rs7020673
rs10815070
rs10758669
rs2150702
rs1556099
rs1755289
rs1857652
rs951005
rs2260411
rs2842488
rs903547
rs2842483
rs2803418
rs2047995
rs1757948
rs1634352
rs1029046
rs290986
rs4562454
rs2812314
rs2567719
rs4263839
rs10984447
rs3761847
rs3780792
rs11256497
rs791587
rs706778
rs2104286
rs3118470
rs12722489
rs7089861
rs7090512
rs947474
rs4750316
rs637440
rs11258164
rs1927457
rs793108
rs17582416
rs2503875
rs2503876
rs1733706
rs10995271
rs10822550
rs10823051
rs10823717
rs7912269
rs2670117
rs1250542
rs1250540
rs1250552
rs1250550
rs10509540
rs7923837
rs11190140
rs716595
rs11195680
rs17267338
rs730080
rs7068990
rs7069806
rs4963128
rs1004446
rs11026091
rs10500817
rs1002254
rs17824933
rs4939490
rs650258
rs694739
rs1620013
rs7927894
rs616214
rs1386330
rs4409785
rs7924357
rs655763
rs491111
rs486394
rs180358
rs11216515
rs630923
rs4938780
rs6589804
rs4142654
rs4373935
rs3133224
rs7941030
rs11221332
rs2156696
rs1944850
rs1800693
rs4149584
rs4149576
rs7311897
rs1805755
rs10771901
rs4763655
rs10466829
rs4763879
rs11053720
rs4764422
rs6488848
rs2417686
rs261902
rs11175593
rs10878220
rs1458175
rs2292239
rs2066808
rs10876994
rs12368653
rs703842
rs1558744
rs7960353
rs7137596
rs653178
rs17696736
rs10507257
rs4767621
rs7137953
rs949143
rs1106240
rs1569068
rs1727315
rs1727313
rs1716167
rs1716168
rs1790100
rs2049114
rs2695478
rs10773145
rs4412800
rs12578774
rs1330730
rs2812746
rs9550637
rs11841753
rs17594362
rs3764147
rs6561169
rs12877713
rs9568281
rs806321
rs9596270
rs914936
rs9523762
rs3899870
rs3899871
rs7334107
rs7493138
rs4468527
rs7160860
rs4902647
rs1465788
rs1125221
rs2300603
rs2119704
rs11629242
rs8008466
rs4900384
rs1579821
rs8031623
rs7174015
rs16976351
rs3825932
rs17841157
rs11631489
rs11074079
rs7171661
rs9788634
rs4393551
rs7163635
rs2744148
rs733410
rs11860603
rs11865121
rs2041670
rs7200786
rs12708716
rs7184083
rs6498169
rs11640138
rs12928822
rs7191700
rs11864333
rs8049603
rs1035946
rs4788084
rs8049439
rs11860650
rs12232421
rs10500510
rs17765606
rs1728785
rs4783708
rs7191888
rs7202877
rs12598123
rs386965
rs13333054
rs1401884
rs17445836
rs9924445
rs11247565
rs4791841
rs34889454
rs5820007
rs4999077
rs2872507
rs2305480
rs2290400
rs7221109
rs2293152
rs9891119
rs744166
rs4792814
rs1373089
rs9901869
rs4239162
rs8070463
rs180515
rs2219402
rs8081928
rs8081176
rs4797328
rs2542151
rs1893217
rs2920001
rs1527436
rs11661212
rs1557351
rs948651
rs12456021
rs7238078
rs763361
rs337718
rs3859314
rs4807569
rs454453
rs390821
rs1077667
rs2278442
rs8112449
rs7253363
rs3745672
rs346172
rs10411936
rs874628
rs10500264
rs241935
rs7255066
rs425105
rs307896
rs281380
rs2303759
rs299175
rs397020
rs2281808
rs747996
rs17408919
rs2223712
rs2424167
rs636116
rs17301932
rs6018946
rs2870137
rs41354748
rs6017342
rs2425752
rs6131010
rs6074022
rs1569723
rs4810485
rs3746821
rs2425764
rs495337
rs2016367
rs2762932
rs2248359
rs2315008
rs6062314
rs1736135
rs467092
rs914148
rs2836878
rs9976767
rs2155722
rs8129601
rs762421
rs4819388
rs2283792
rs2412973
rs5753037
rs136319
rs9621545
rs2072711
rs743777
rs229541
rs3752591
rs874960
rs17000271
rs5771069
rs140522
rs5978649
rs886546
rs5926910
rs1368769
rs4271113
rs5918201
rs12008641
